# Supplementary material for: The Response of Growth and Transcriptome Profiles of Tea Grey Blight Disease Pathogen Pestalotiopsis theae to the Variation of Exogenous L-Theanine
Source: MDPI journal article supplement (doi:10.3390/ijms25063493), 2024-03-20

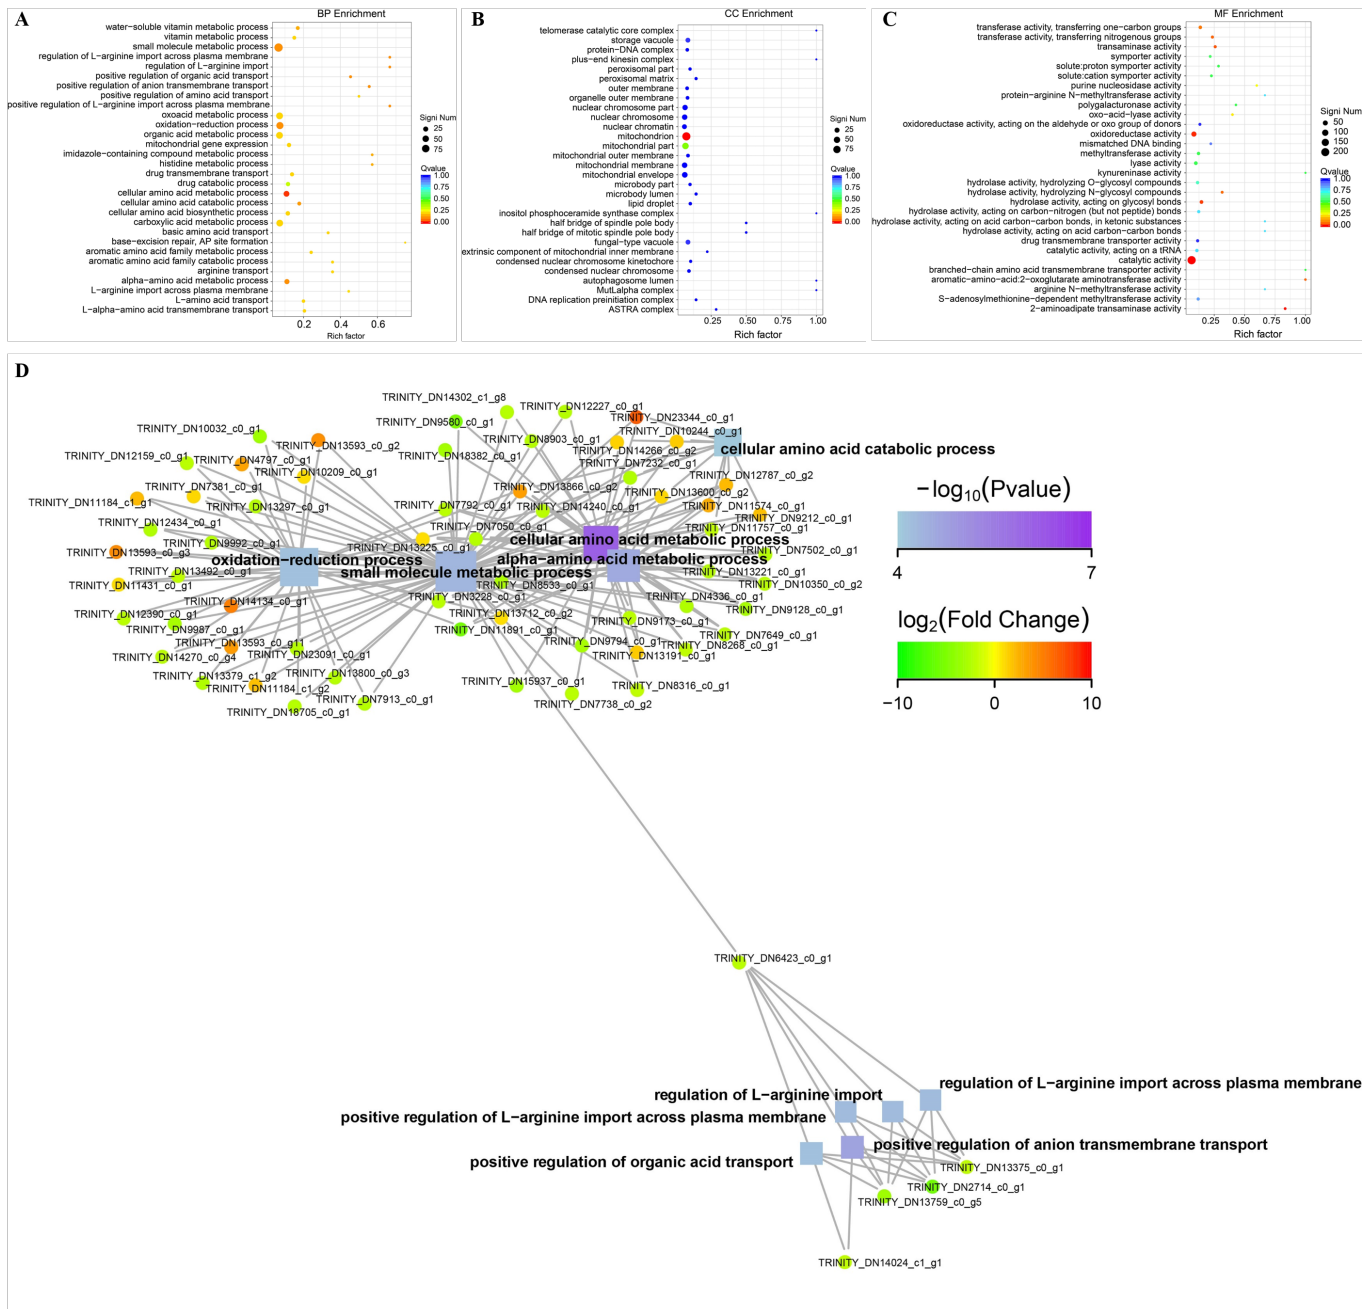

Figure S2. BP/CC/MF analysis and gene correlation network of DEGs in Th2 vs. Th0 comparison

A

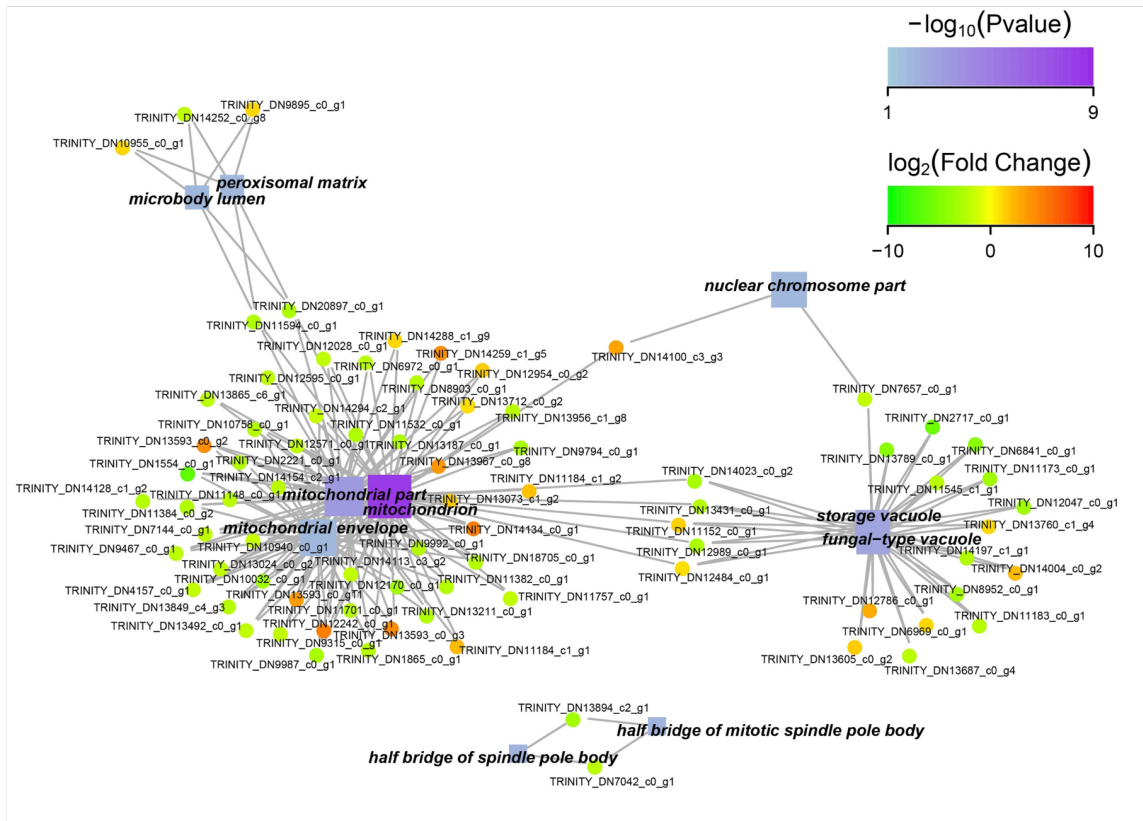

B

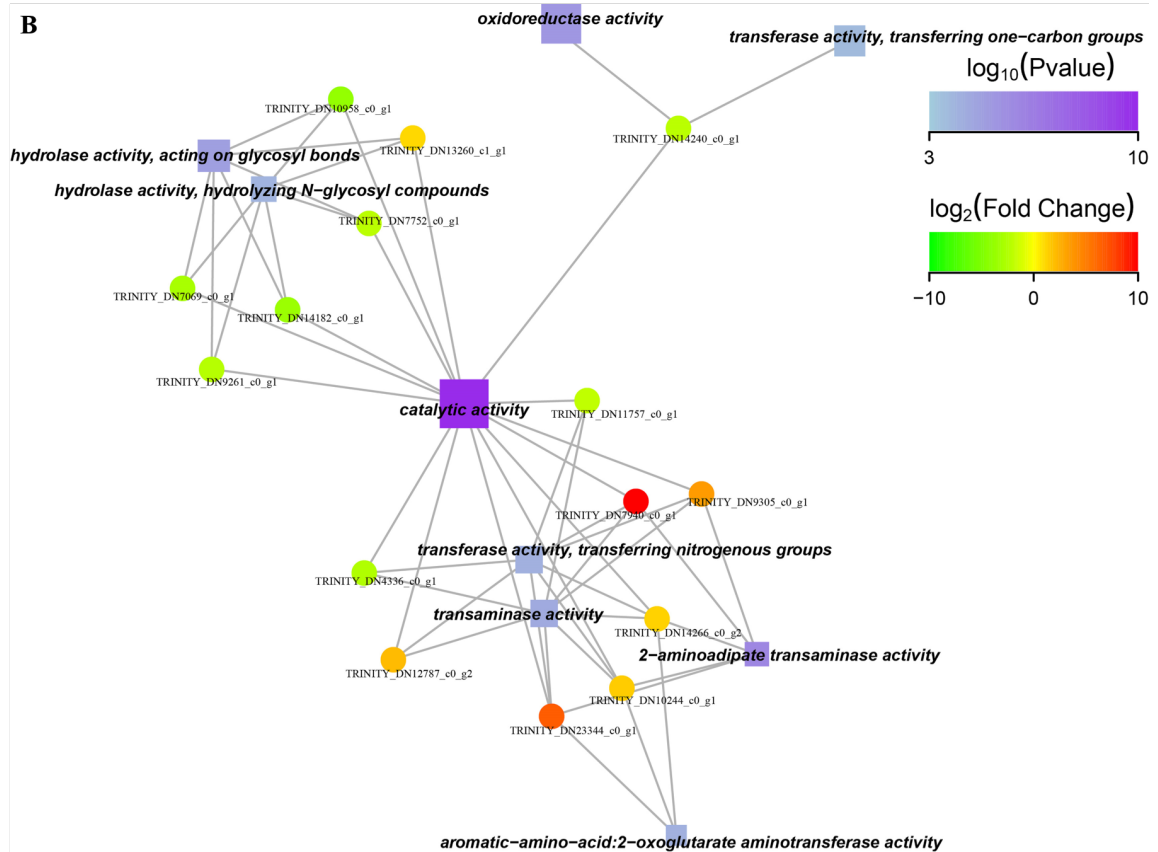

Figure S3. Correlation network of DEGs involved in CC and MF in Th2 vs. Th0 comparison

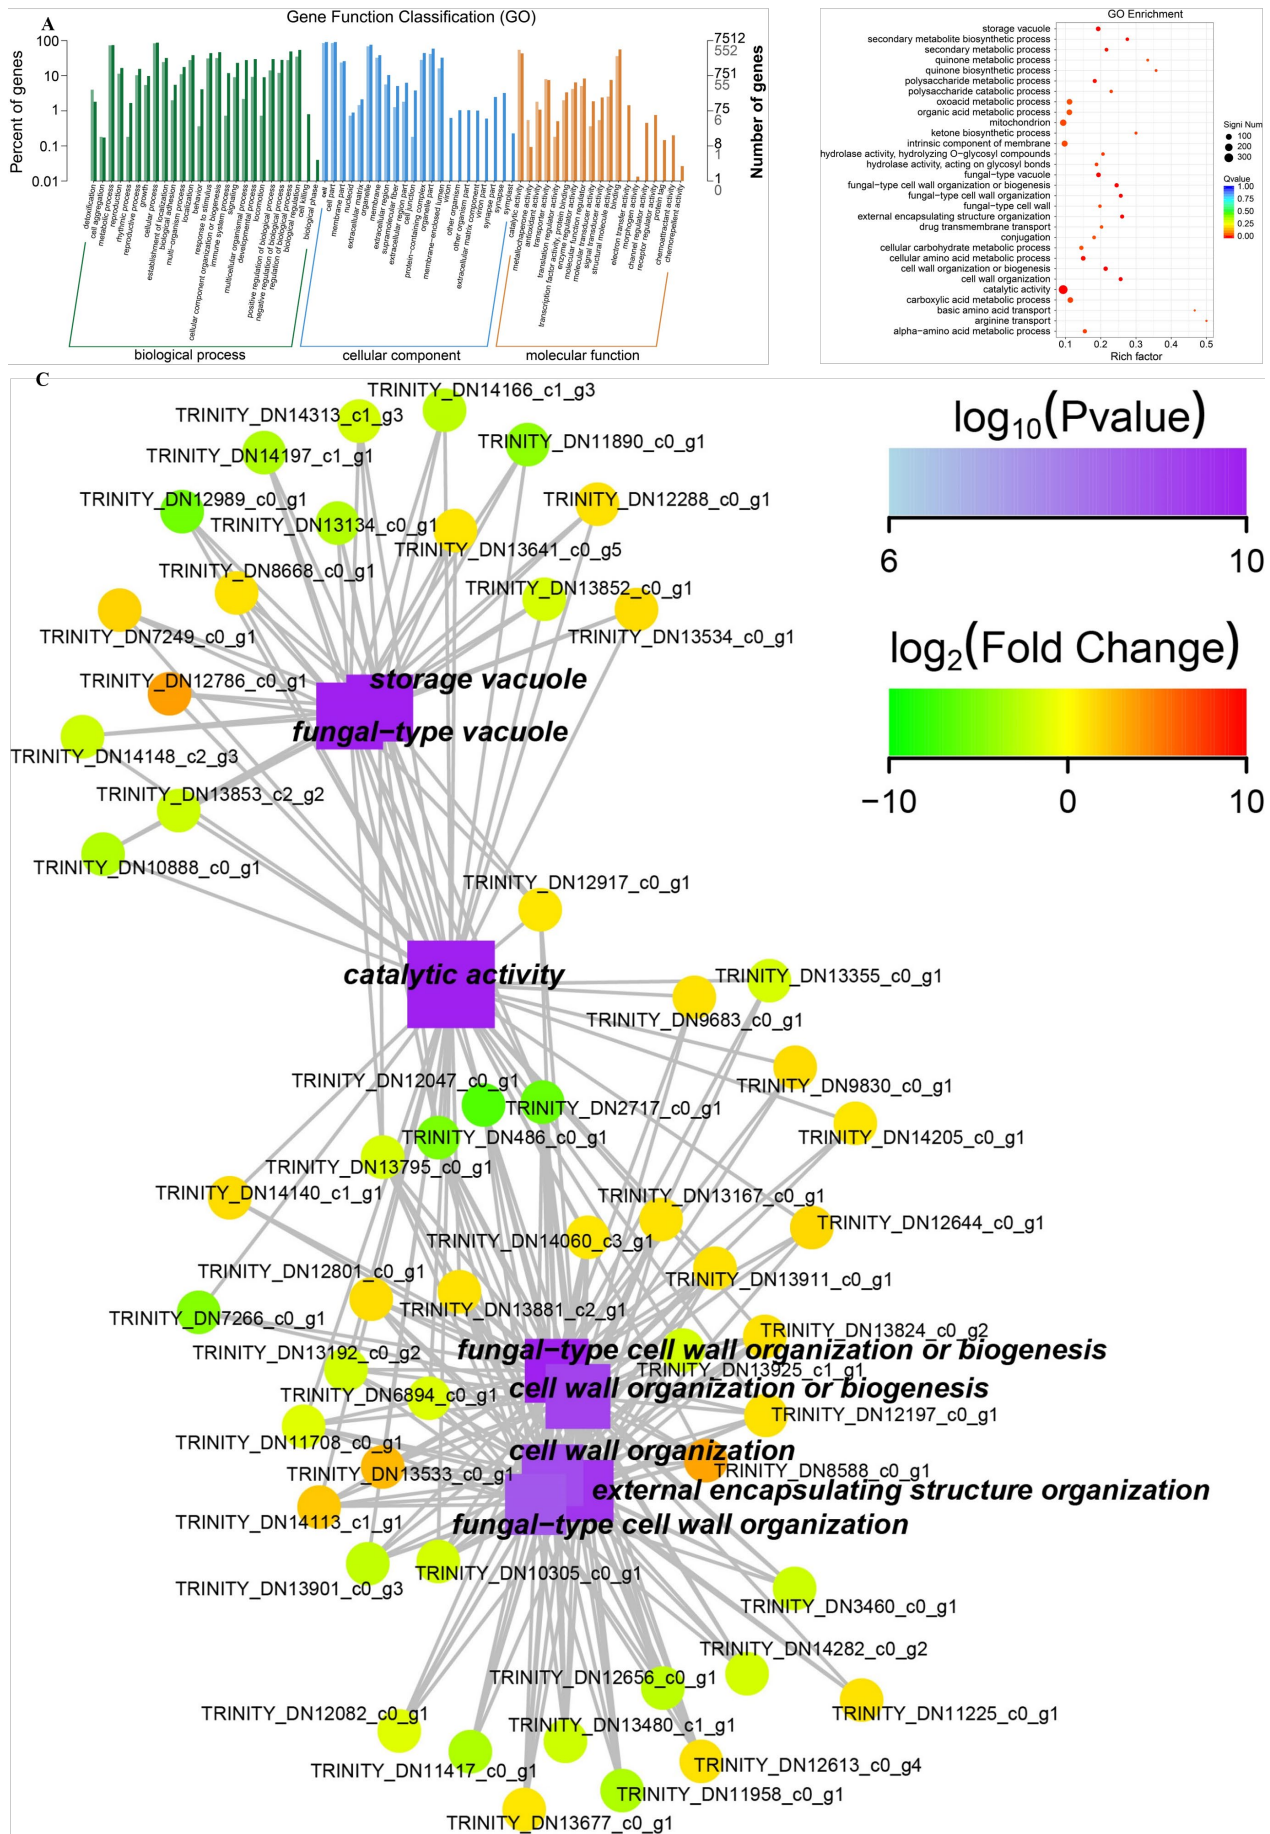



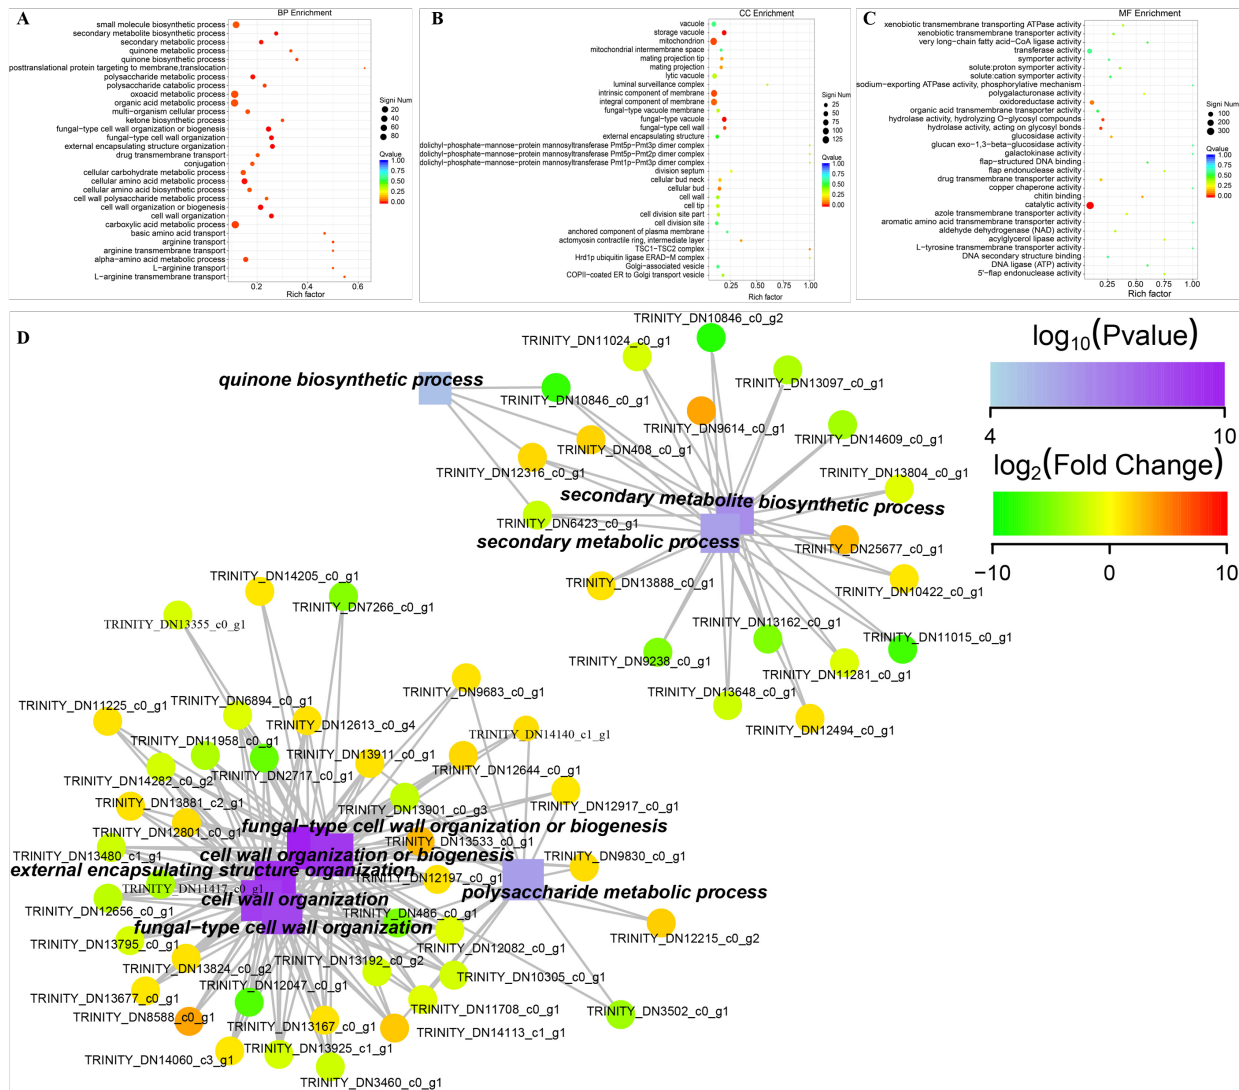

Figure S5. BP/CC/MF analysis and gene correlation network of DEGs in Th4\_vs\_Th0 comparison

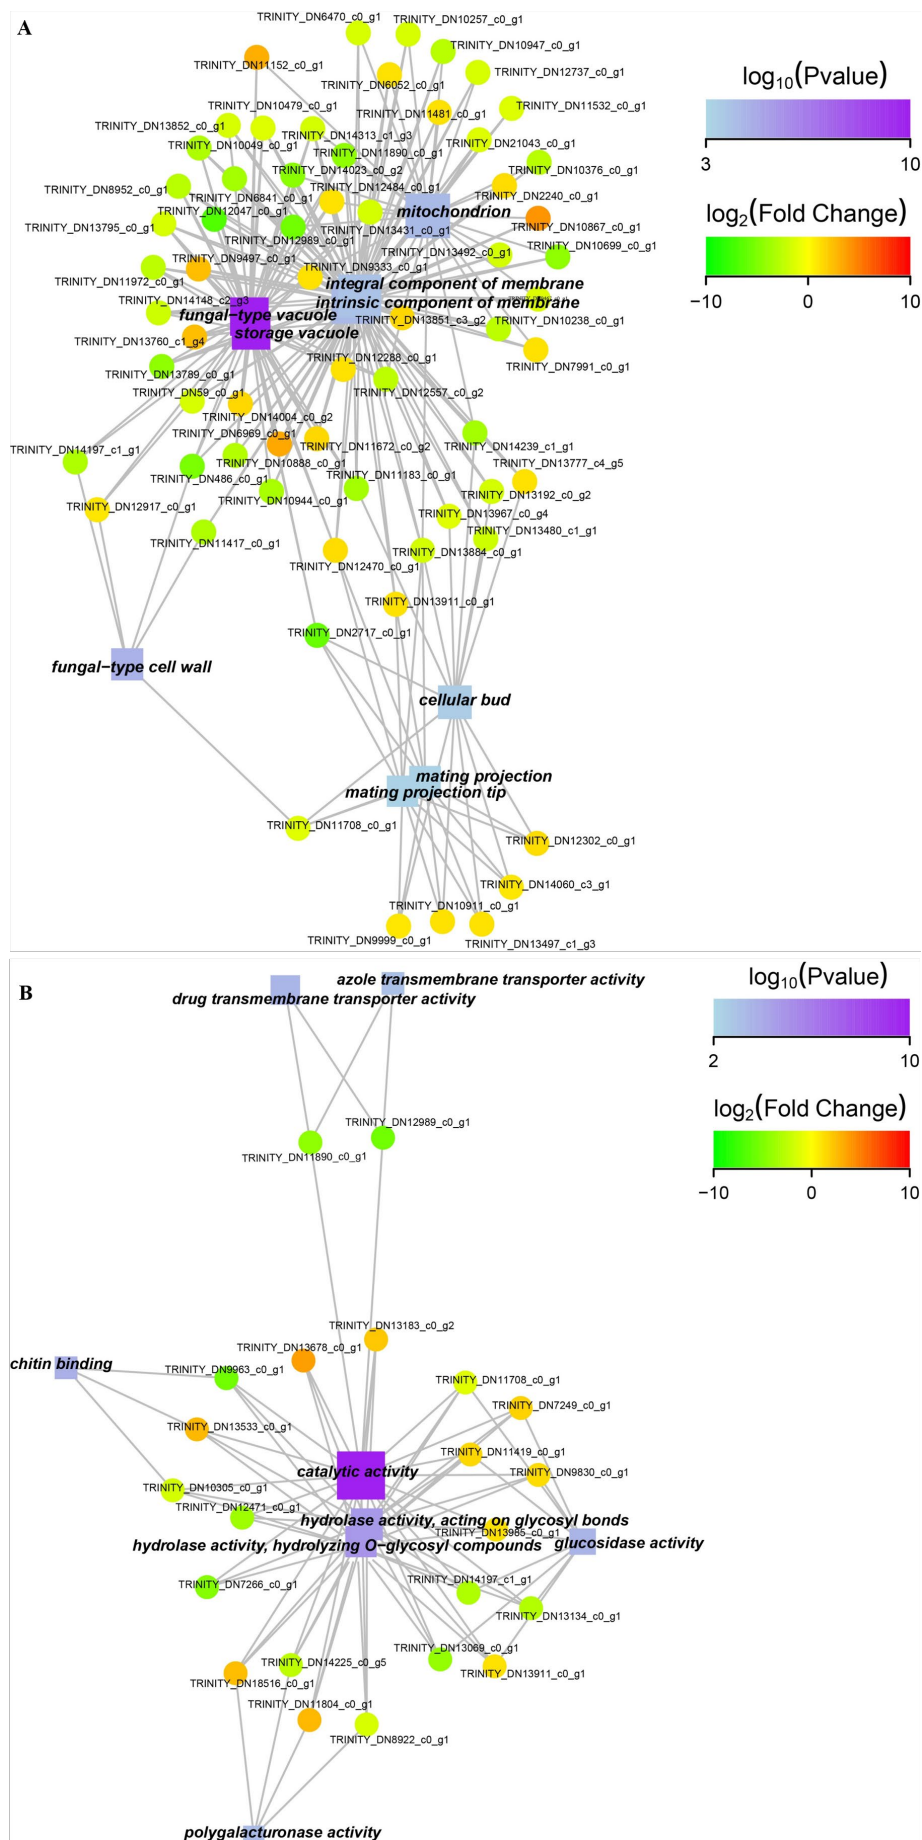

Figure S6. Correlation network of DEGs involved in CC and MF in Th4 vs. Th0 comparison

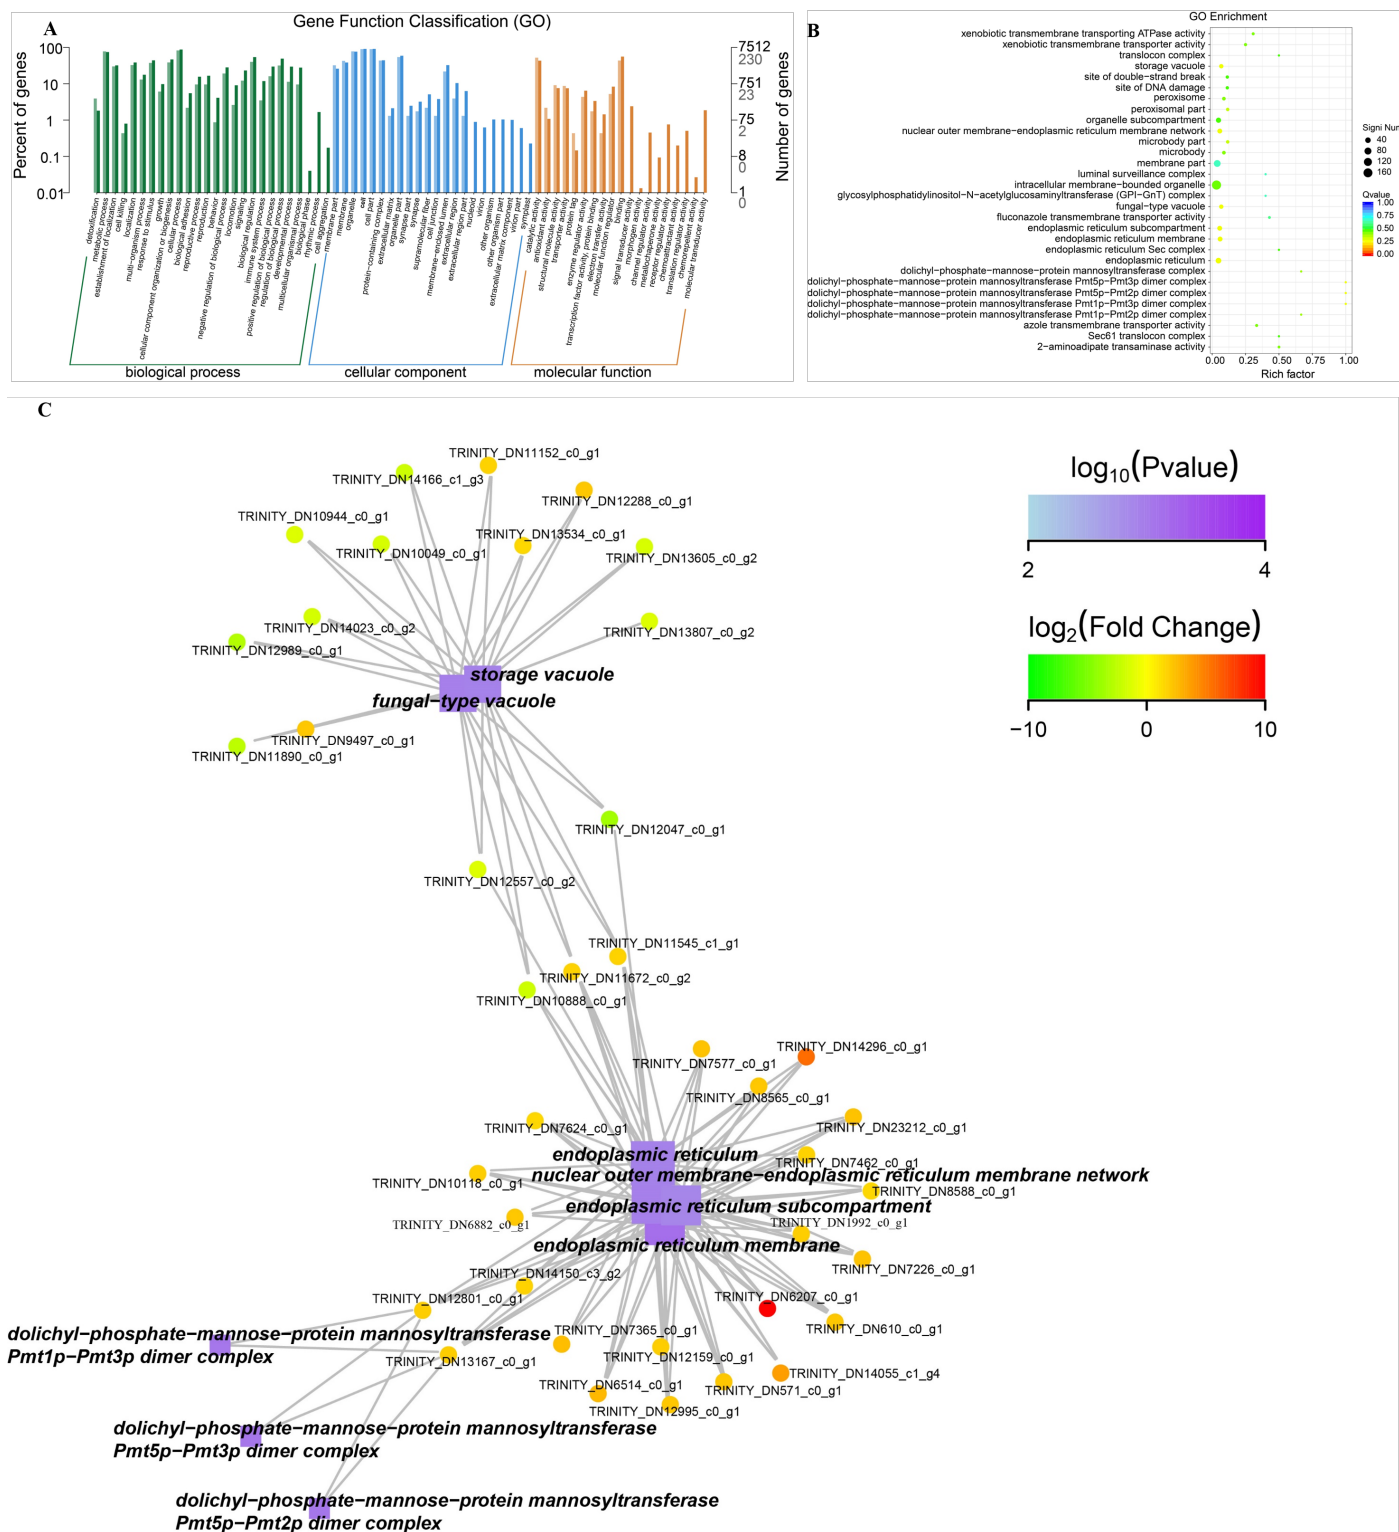

Figure S7. GO analysis of DEGs in Th4 vs. Th2 comparison

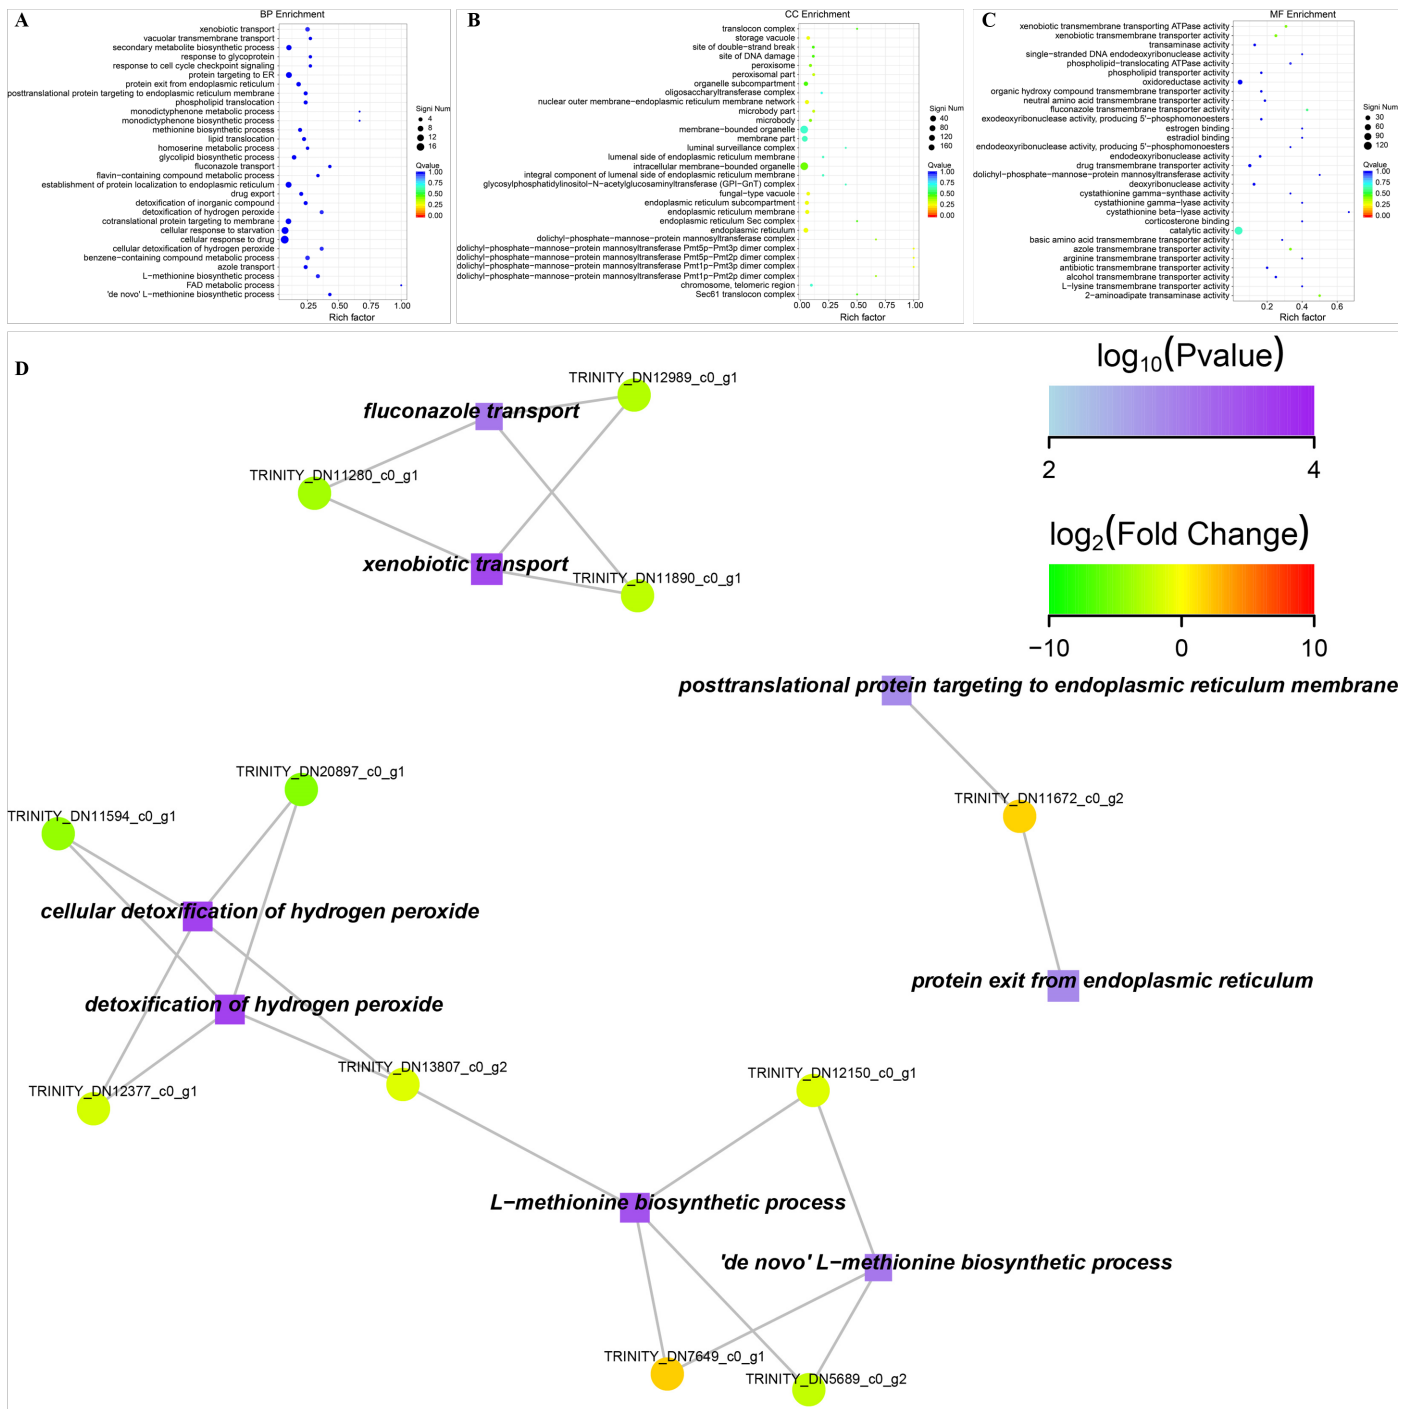

Figure S8. BP/CC/MF analysis and gene correlation network of DEGs in Th4 vs. Th2 comparison



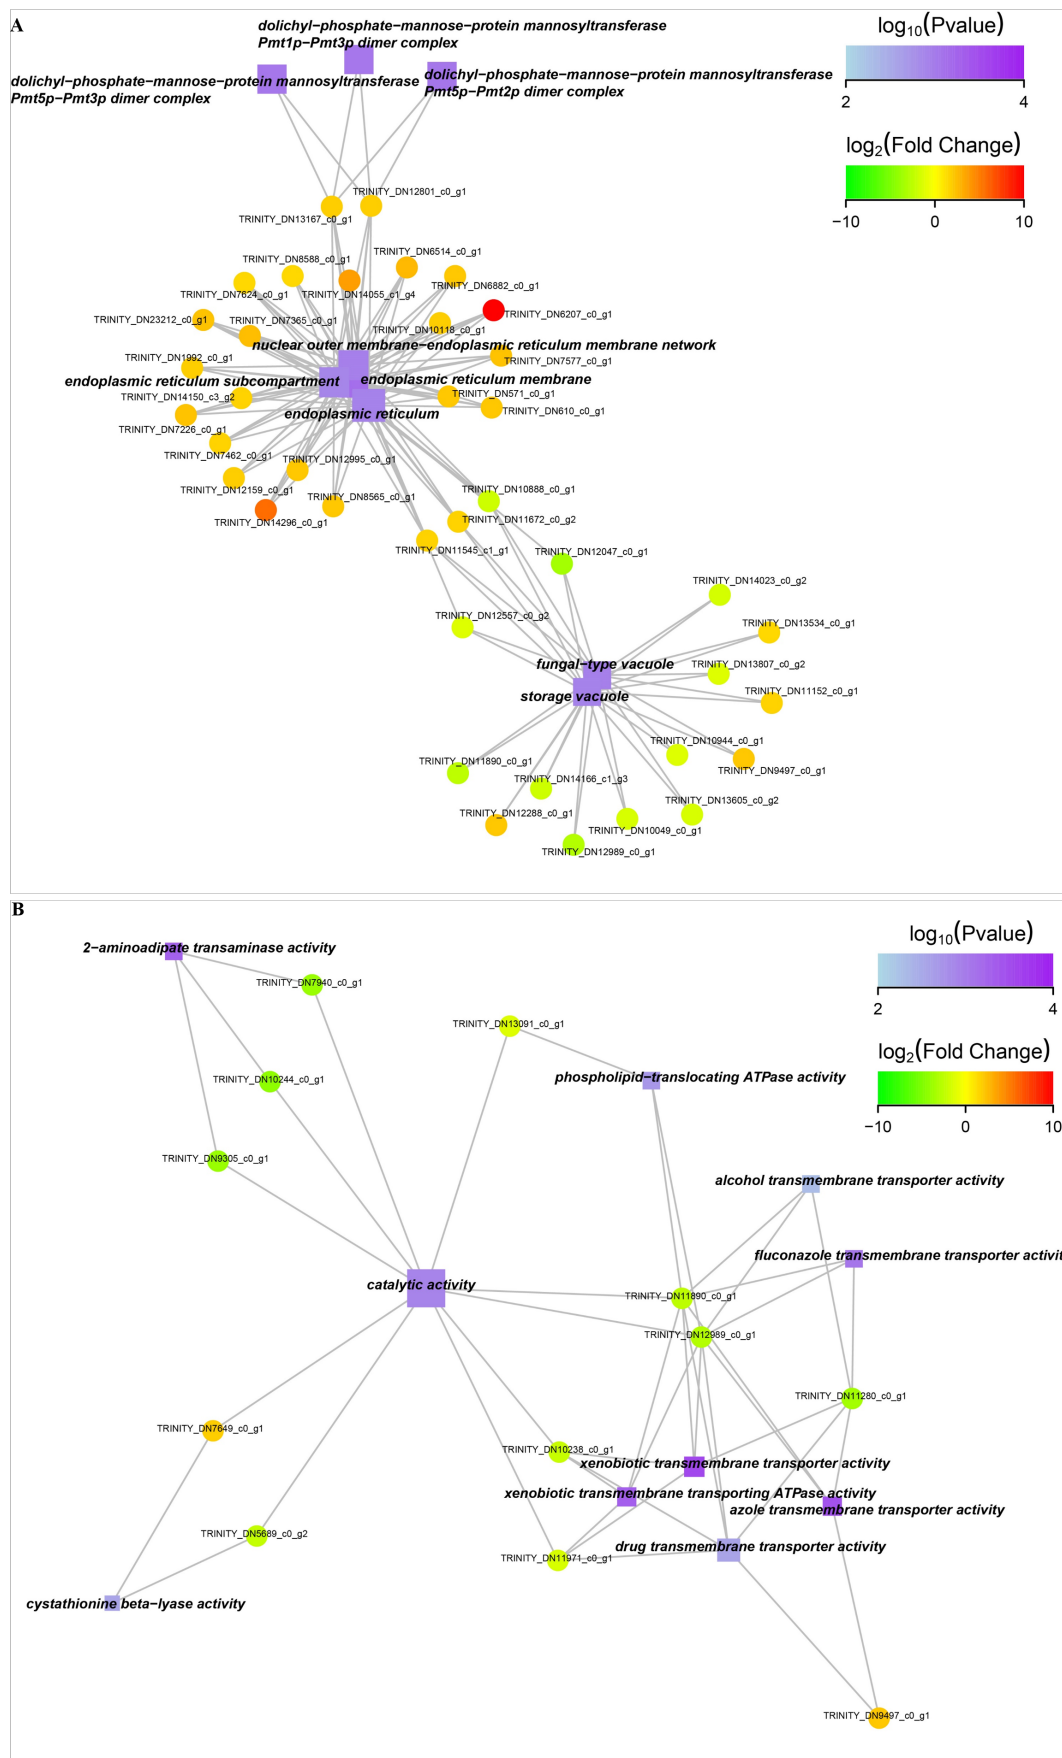

Figure S9. Correlation network of DEGs involved in CC and MF in Th4 vs. Th2 comparison

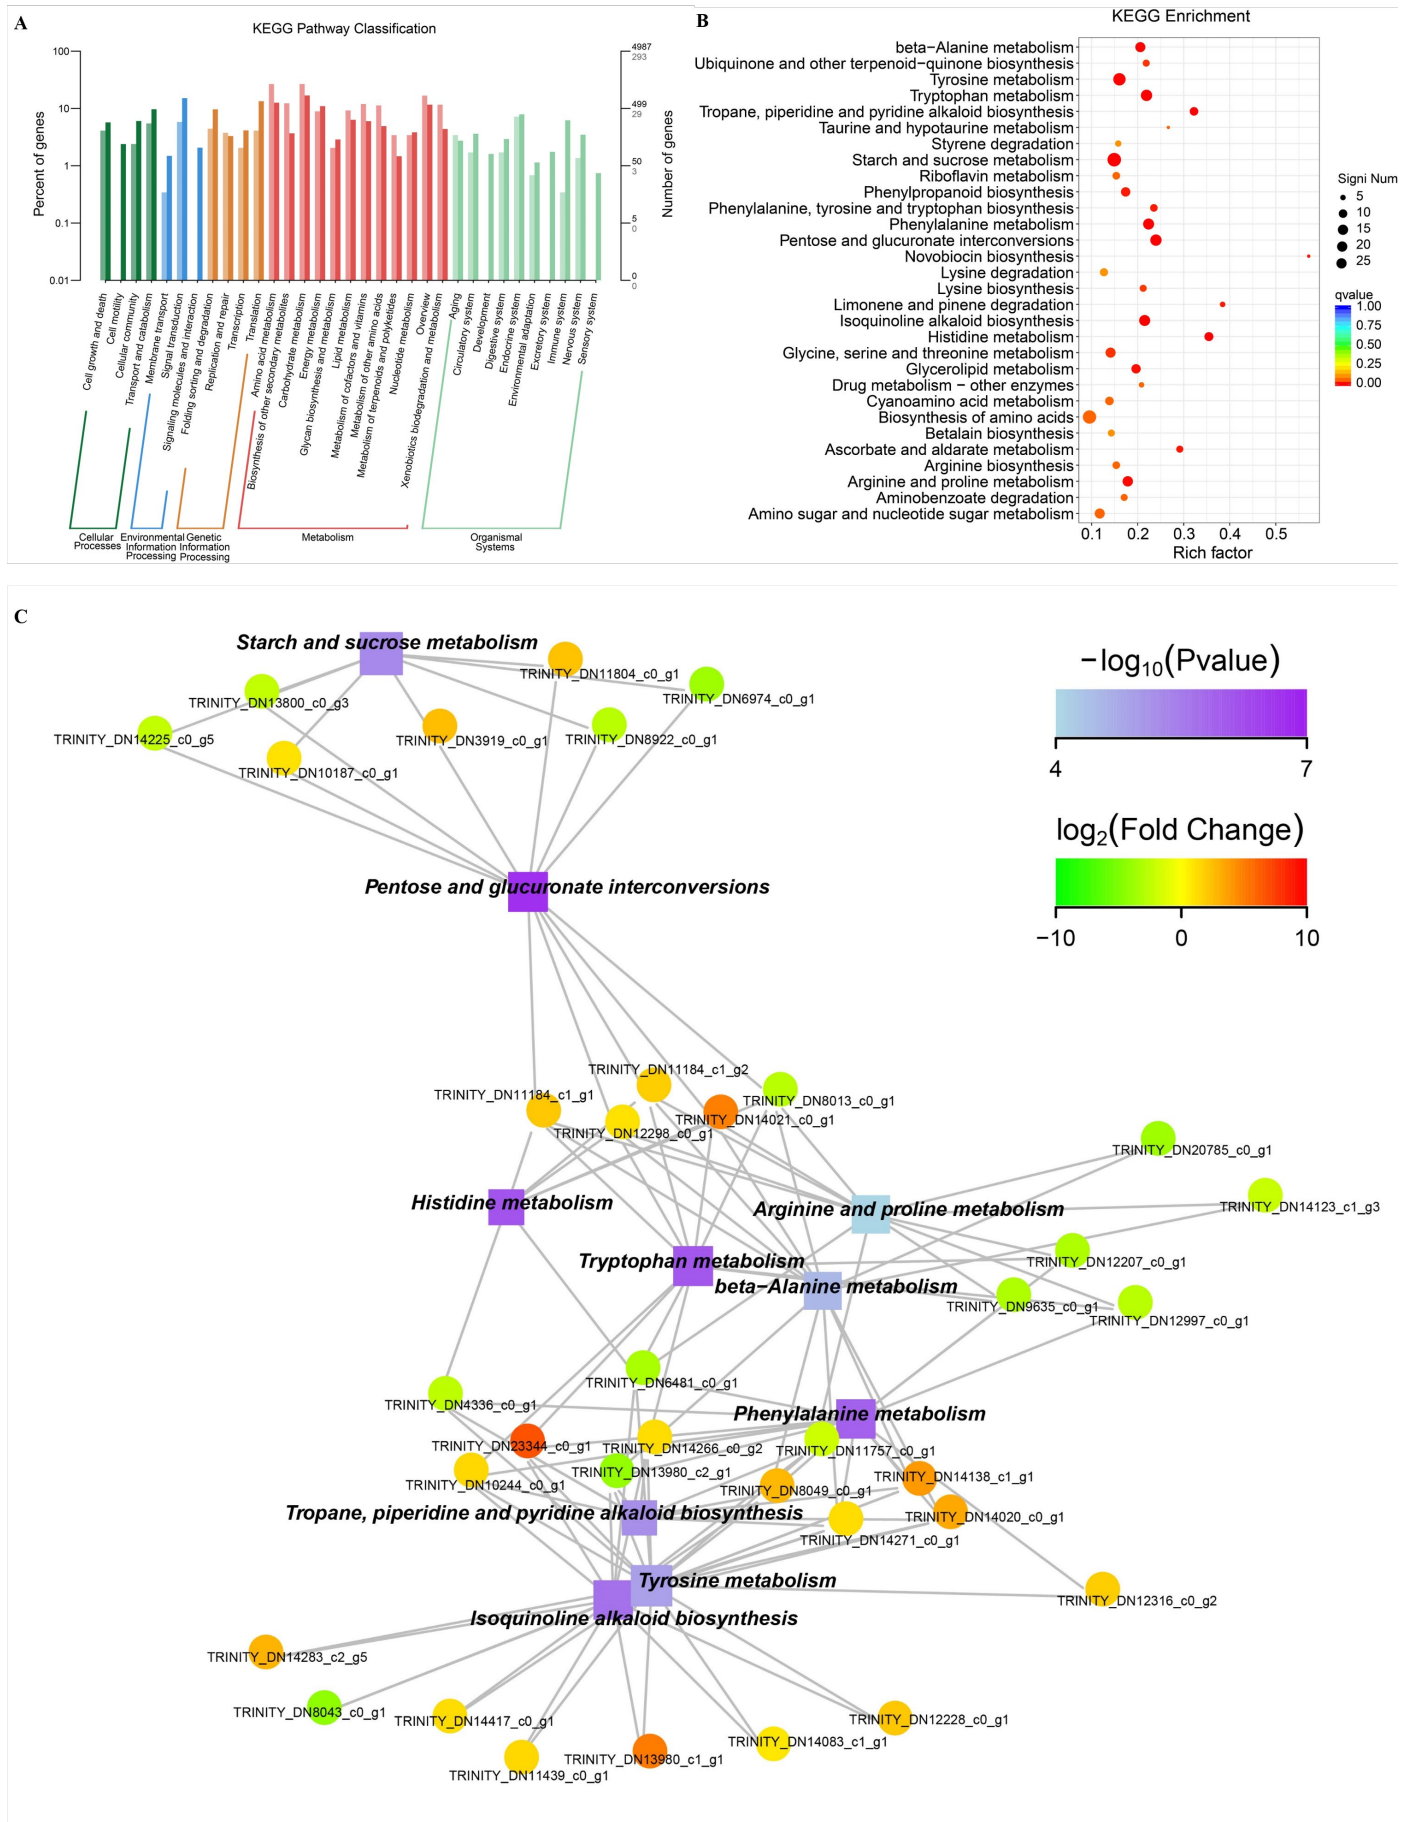

Figure S10. KEGG analysis of DEGs in Th2 vs. Th0 comparison

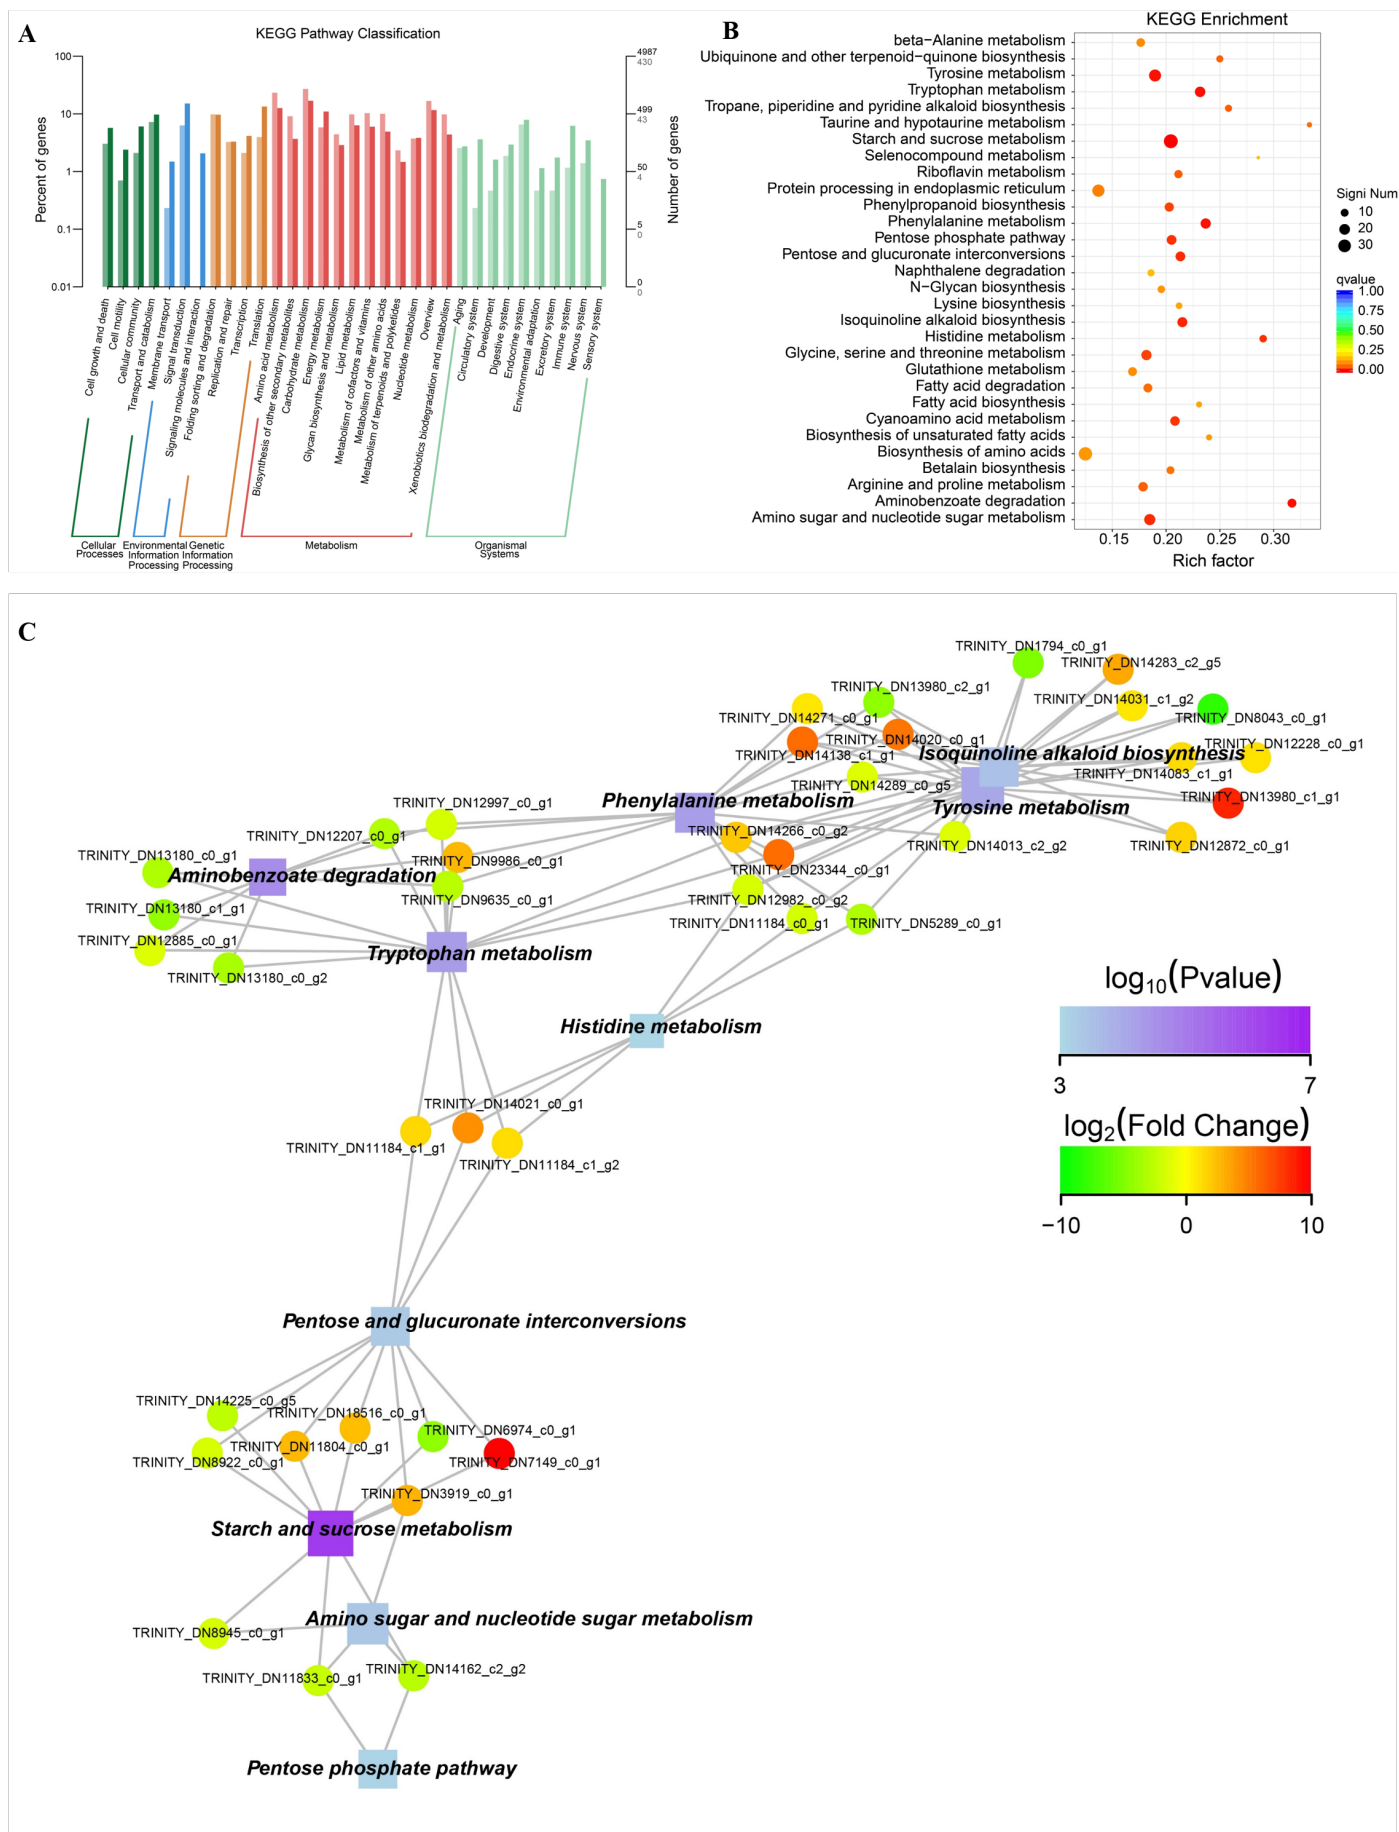

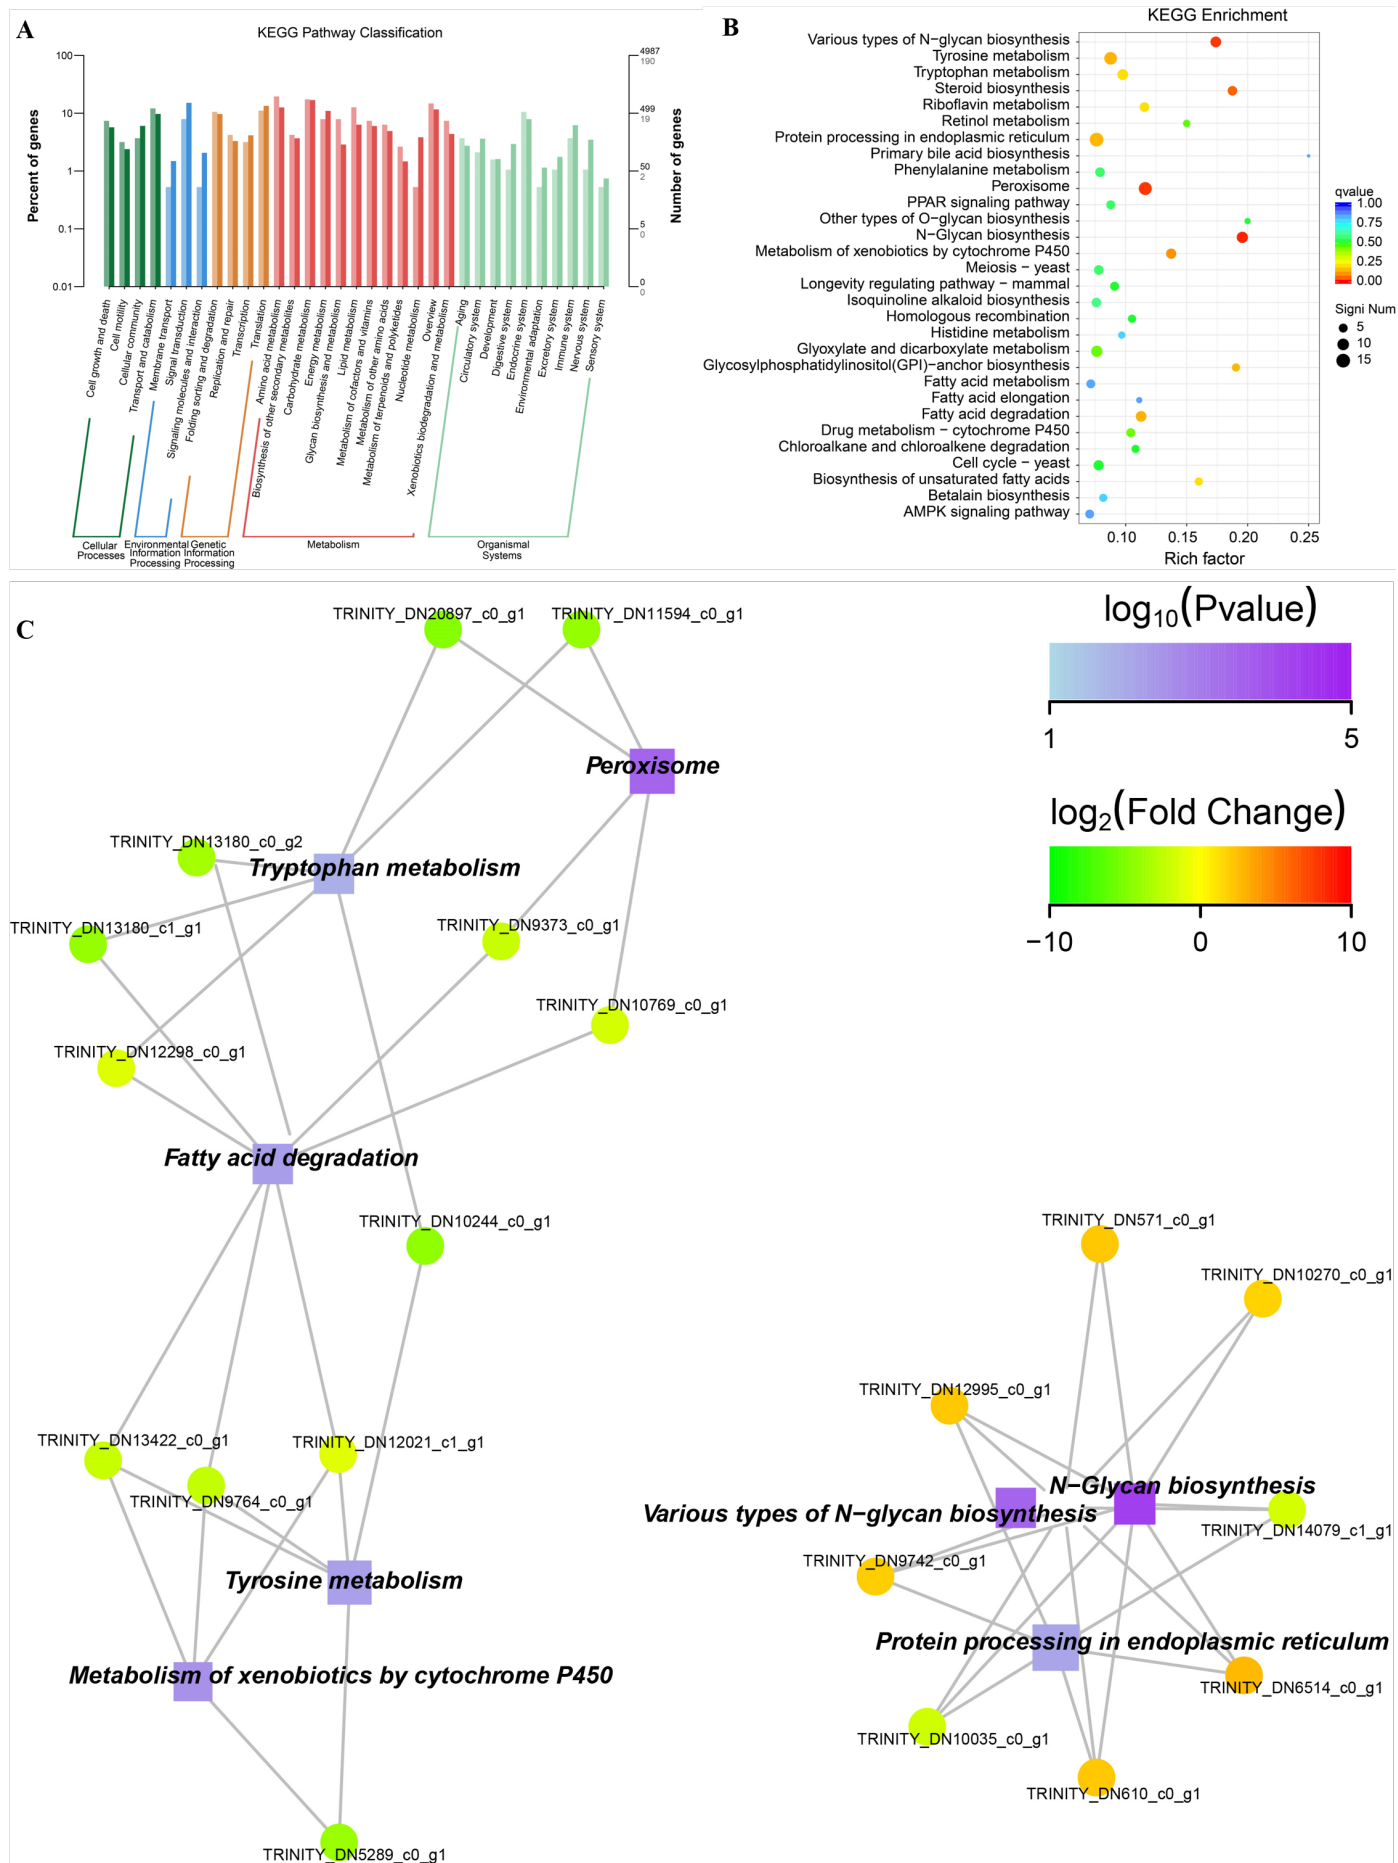



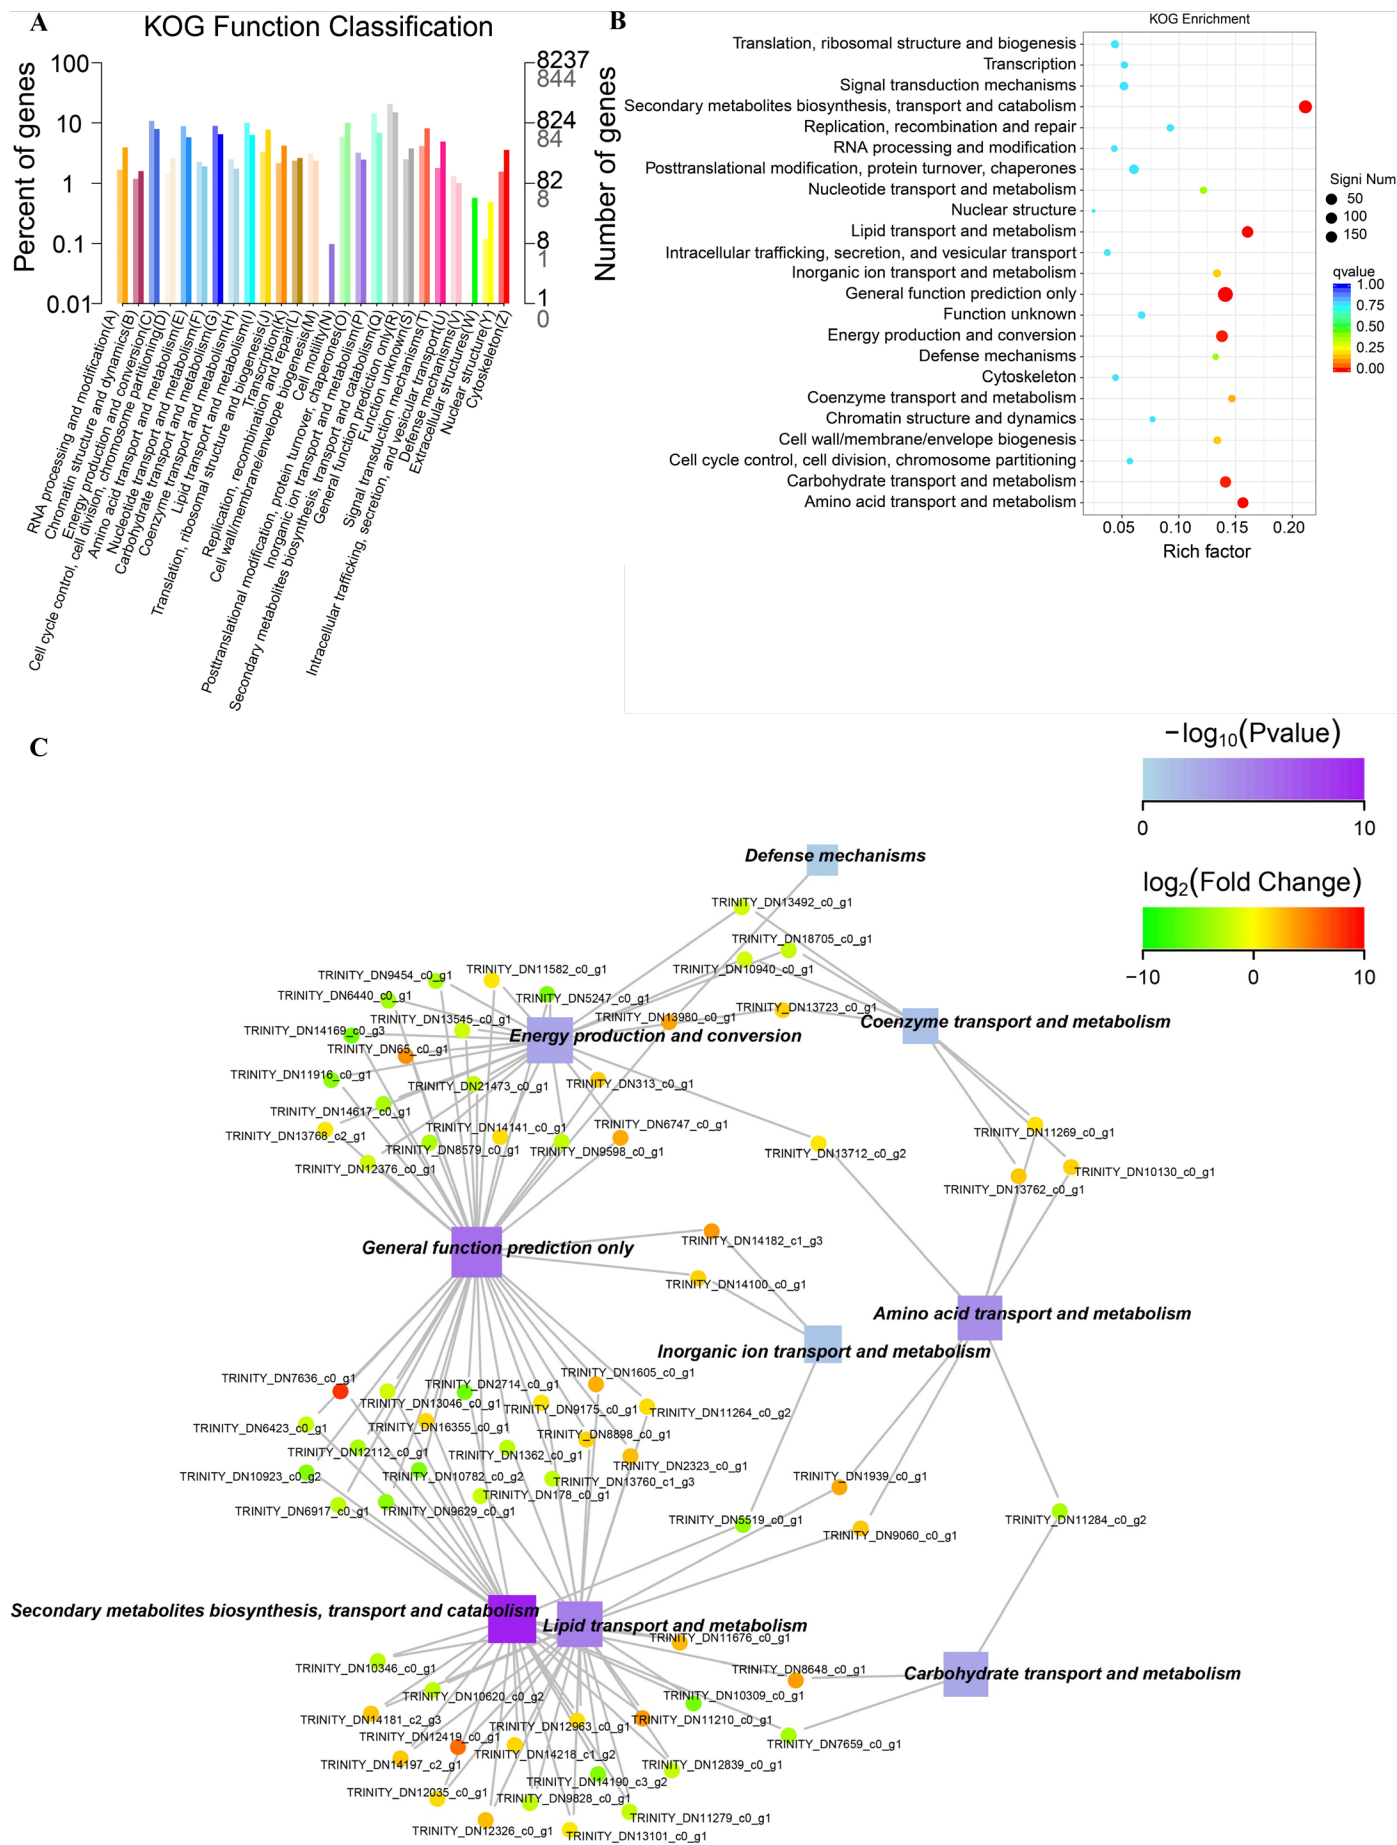

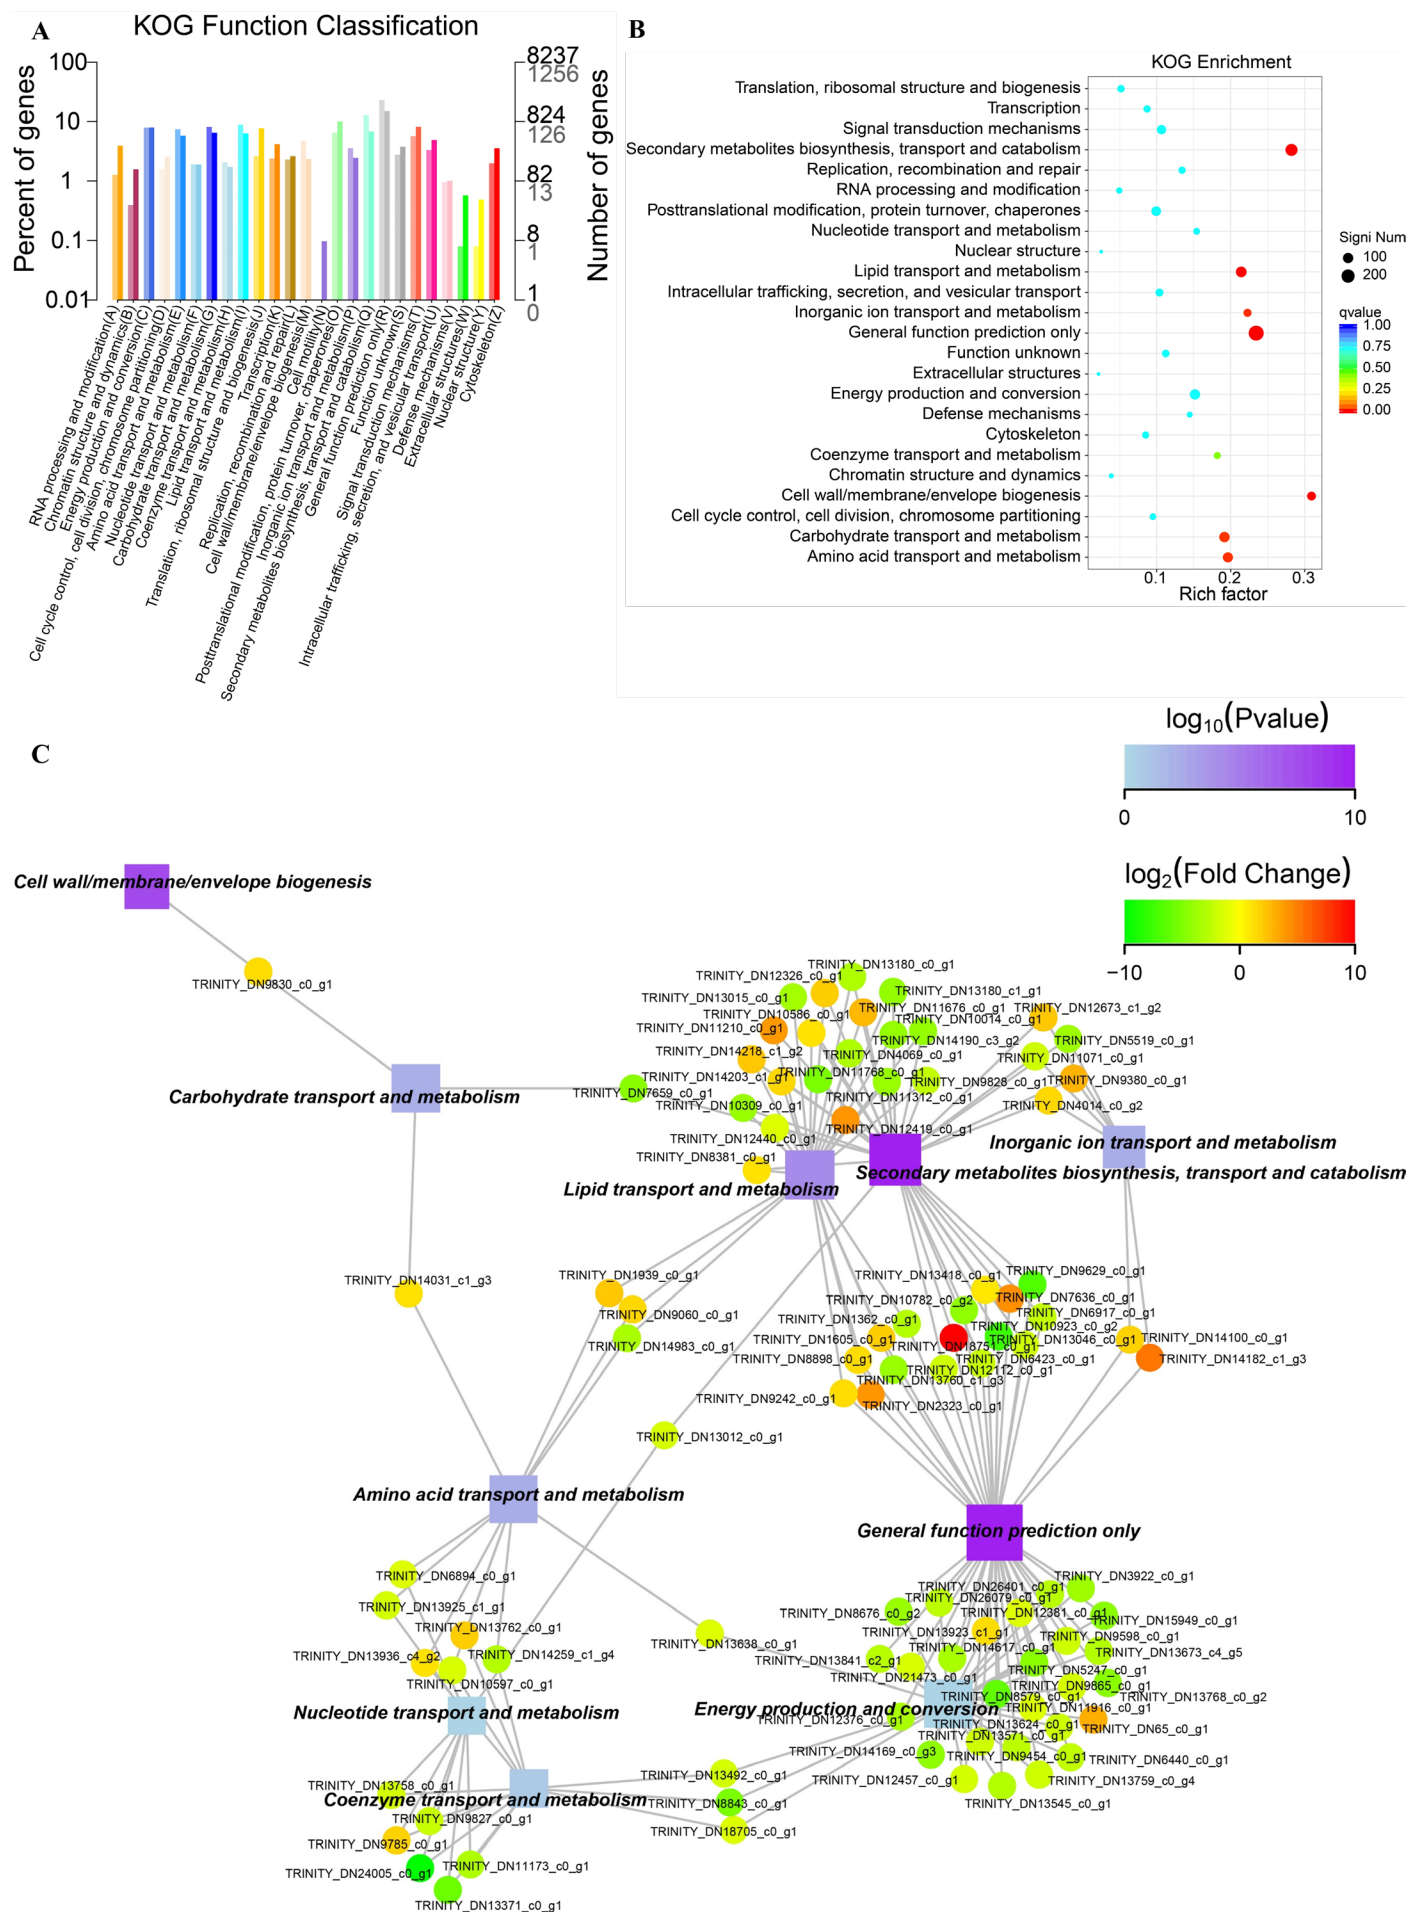

Figure S14. KOG analysis of DEGs in Th4 vs. Th0 comparison

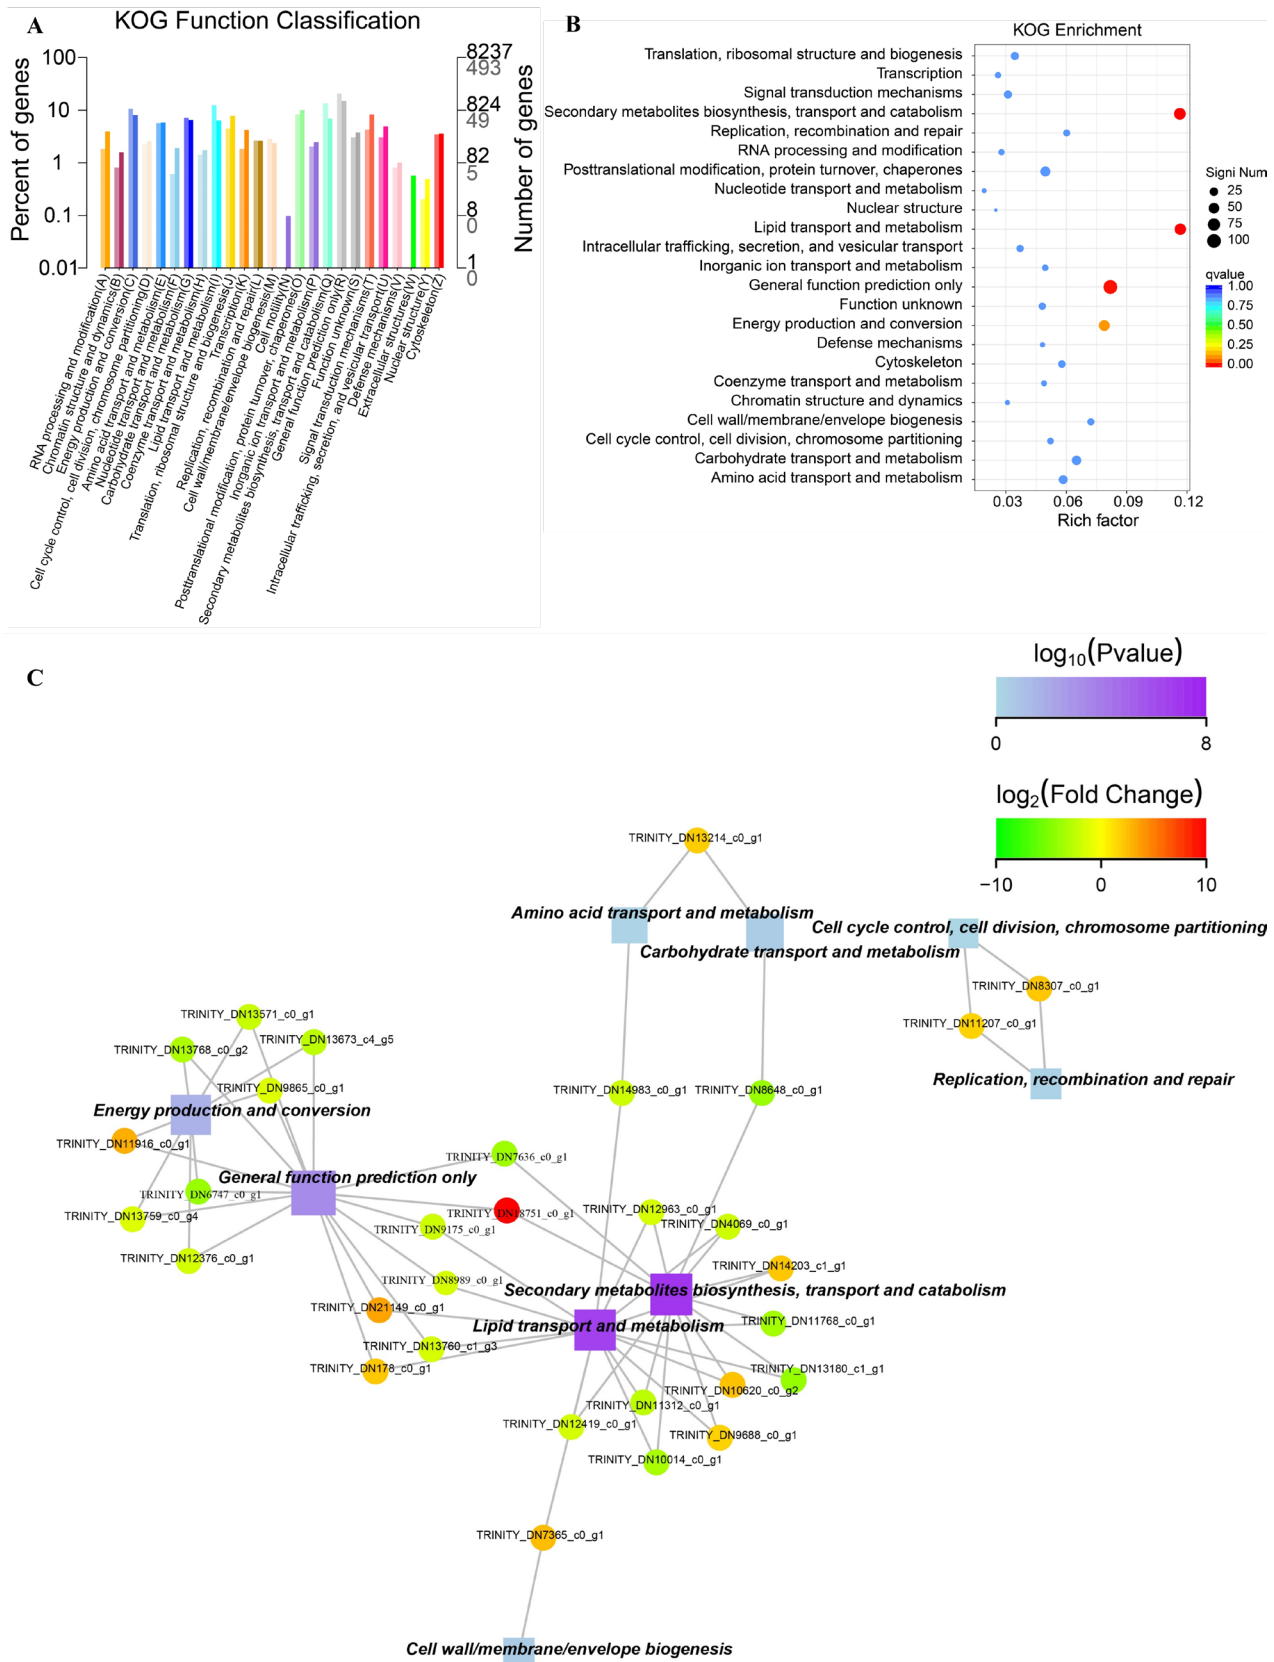

Supplement: s1 [file s1]
