# Supplementary material for: The Response of Growth and Transcriptome Profiles of Tea Grey Blight Disease Pathogen Pestalotiopsis theae to the Variation of Exogenous L-Theanine
Source: Int J Mol Sci. 2024 Mar 20;25(6):3493. doi: 10.3390/ijms25063493 (PMC10971465; doi:10.3390/ijms25063493)
Supplement: Supplementary file 1 [file ijms-25-03493-s001.zip]

Archive with 11 entries (11 files):
- ijms-2863686-supplementary/Supplemental Table S1.xlsx
- ijms-2863686-supplementary/Supplemental Table S10.xlsx
- ijms-2863686-supplementary/Supplemental Table S2.xlsx
- ijms-2863686-supplementary/Supplemental Table S3.xlsx
- ijms-2863686-supplementary/Supplemental Table S4.xlsx
- ijms-2863686-supplementary/Supplemental Table S5.xlsx
- ijms-2863686-supplementary/Supplemental Table S6.xlsx
- ijms-2863686-supplementary/Supplemental Table S7.xlsx
- ijms-2863686-supplementary/Supplemental Table S8.xlsx
- ijms-2863686-supplementary/Supplemental Table S9.xlsx
- ijms-2863686-supplementary/Supplementary Figures S1-S15.pdf
