# Supplementary material for: The Response of Growth and Transcriptome Profiles of Tea Grey Blight Disease Pathogen Pestalotiopsis theae to the Variation of Exogenous L-Theanine
Source: Int J Mol Sci. 2024 Mar 20;25(6):3493. doi: 10.3390/ijms25063493 (PMC10971465; doi:10.3390/ijms25063493)
Supplement: Supplementary file 1 [file ijms-25-03493-s001.zip › ijms-2863686-supplementary/Supplemental Table S1.xlsx]

## Sheet: QC
Table S1. Summary of the sequencing and mapping statistics
Index	Th0-1	Th0-2	Th0-3	Th2-1	Th2-2	Th2-3	Th4-1	Th4-2	Th4-3
Raw Reads
Total Raw Reads Count(#)	48991594	58861044	49221970	58528460	60162814	56346080	56346344	58964178	54849142
Total Raw Bases Count(bp)	7348739100	8829156600	7383295500	8779269000	9024422100	8451912000	8451951600	8844626700	8227371300
Average Raw Read Length(bp)	150	150	150	150	150	150	150	150	150
Q10 Bases Count(bp)	7343753039	8824200341	7379719243	8773958868	9019050318	8447314817	8447869838	8839740890	8223695517
Q10 Bases Ratio(%)	0.9993	0.9994	0.9995	0.9994	0.9994	0.9995	0.9995	0.9994	0.9996
Q20 Bases Count(bp)	7079991052	8530609003	7160003758	8464682996	8707087820	8183536366	8207478237	8550881247	8038191213
Q20 Bases Ratio(%)	0.9634	0.9662	0.9698	0.9642	0.9648	0.9682	0.9711	0.9668	0.977
Q30 Bases Count(bp)	6738647410	8146614719	6863384663	8058092320	8294984445	7829950626	7887883721	8172167768	7749990691
Q30 Bases Ratio(%)	0.917	0.9227	0.9296	0.9179	0.9192	0.9264	0.9333	0.924	0.942
N Bases Count(bp)	4986061	4956259	3576257	5310132	5371782	4597183	4081762	4885810	3675783
N Bases Ratio(%)	0.0007	0.0006	0.0005	0.0006	0.0006	0.0005	0.0005	0.0006	0.0004
GC Bases Count(bp)	3876896486	4712085943	3936853707	4664286246	4724675279	4336661169	4520288051	4582793169	4299520808
GC Bases Ratio(%)	0.5276	0.5337	0.5332	0.5313	0.5235	0.5131	0.5348	0.5181	0.5226
Clean Reads
Total Clean Reads Count(#)	44610600	54286066	45964848	53761332	55268590	52370120	52759384	54498568	52011706
Total Clean Bases Count(bp)	6494620229	7919179293	6717139390	7856307716	8092900439	7667740313	7682122291	7968665552	7461361156
Average Clean Read Length(bp)	145.58	145.88	146.14	146.13	146.43	146.41	145.61	146.22	143.46
Q10 Bases Count(bp)	6493973988	7918486236	6716613253	7855546688	8092121223	7667071572	7681556820	7967961693	7460961535
Q10 Bases Ratio(%)	0.9999	0.9999	0.9999	0.9999	0.9999	0.9999	0.9999	0.9999	0.9999
Q20 Bases Count(bp)	6379465785	7784510409	6609928212	7713769714	7947405956	7539071422	7567694670	7833273244	7381336508
Q20 Bases Ratio(%)	0.9823	0.983	0.984	0.9819	0.982	0.9832	0.9851	0.983	0.9893
Q30 Bases Count(bp)	6161462678	7528556698	6404740434	7441598668	7670754334	7296223209	7349756938	7578354307	7189742527
Q30 Bases Ratio(%)	0.9487	0.9507	0.9535	0.9472	0.9478	0.9515	0.9567	0.951	0.9636
N Bases Count(bp)	646241	693057	526137	761028	779216	668741	565471	703859	399621
N Bases Ratio(%)	0.0001	0.0001	0.0001	0.0001	0.0001	0.0001	0.0001	0.0001	0.0001
GC Bases Count(bp)	3438425423	4240679617	3590622536	4186266383	4249630797	3945183438	4119906993	4140582354	3901690995
GC Bases Ratio(%)	0.5294	0.5355	0.5345	0.5329	0.5251	0.5145	0.5363	0.5196	0.5229
Mapped Reads
Total reads	44165908(100.00%)	53595634(100.00%)	44903400(100.00%)	50960986(100.00%)	41438726(100.00%)	62075936(100.00%)	51907352(100.00%)	35743096(100.00%)	51842338(100.00%)
Total mapped	43708845(98.97%)	53097471(99.07%)	44510262(99.12%)	50326077(98.75%)	40962544(98.85%)	61069409(98.38%)	51356898(98.94%)	35253671(98.63%)	50805072(98.00%)
Mutiple mapped	38776210(87.80%)	47183138(88.04%)	38826782(86.47%)	44955743(88.22%)	35683225(86.11%)	53179430(85.67%)	45505419(87.67%)	31318327(87.62%)	45451874(87.67%)
Uniquely mapped	4932635(11.17%)	5914333(11.04%)	5683480(12.66%)	5370334(10.54%)	5279319(12.74%)	7889979(12.71%)	5851479(11.27%)	3935344(11.01%)	5353198(10.33%)
Read-1 mapped	2468463(5.59%)	2956270(5.52%)	2841342(6.33%)	2684069(5.27%)	2643283(6.38%)	3948228(6.36%)	2929180(5.64%)	1966557(5.50%)	2667118(5.14%)
Read-2 mapped	2464172(5.58%)	2958063(5.52%)	2842138(6.33%)	2686265(5.27%)	2636036(6.36%)	3941751(6.35%)	2922299(5.63%)	1968787(5.51%)	2686080(5.18%)
Reads map to '+'	2456839(5.56%)	2934032(5.47%)	2831857(6.31%)	2649664(5.20%)	2631355(6.35%)	3920013(6.31%)	2916242(5.62%)	1940221(5.43%)	2600520(5.02%)
Reads map to '-'	2475796(5.61%)	2980301(5.56%)	2851623(6.35%)	2720670(5.34%)	2647964(6.39%)	3969966(6.40%)	2935237(5.65%)	1995123(5.58%)	2752678(5.31%)
Non-splice reads	4932635(11.17%)	5914333(11.04%)	5683480(12.66%)	5370334(10.54%)	5279319(12.74%)	7889979(12.71%)	5851479(11.27%)	3935344(11.01%)	5353198(10.33%)
Splice reads	0(0.00%)	0(0.00%)	0(0.00%)	0(0.00%)	0(0.00%)	0(0.00%)	0(0.00%)	0(0.00%)	0(0.00%)
Reads mapped in proper pairs	4726146(10.70%)	5680460(10.60%)	5493150(12.23%)	5101754(10.01%)	5108146(12.33%)	7530216(12.13%)	5599588(10.79%)	3740420(10.46%)	4859038(9.37%)
