# Supplementary material for: The Response of Growth and Transcriptome Profiles of Tea Grey Blight Disease Pathogen Pestalotiopsis theae to the Variation of Exogenous L-Theanine
Source: Int J Mol Sci. 2024 Mar 20;25(6):3493. doi: 10.3390/ijms25063493 (PMC10971465; doi:10.3390/ijms25063493)
Supplement: Supplementary file 1 [file ijms-25-03493-s001.zip › ijms-2863686-supplementary/Supplemental Table S2.xlsx]

## Sheet: gene_expression
Table S2 . All unigenes identified in the transcriptome of all fungal samples
Gene ID	Count (Th0-1)	TPM (Th0-1)	Count (Th0-2)	TPM (Th0-2)	Count (Th0-3)	TPM (Th0-3)	Count (Th2-1)	TPM (Th2-1)	Count (Th2-2)	TPM (Th2-2)	Count (Th2-3)	TPM (Th2-3)	Count (Th4-1)	TPM (Th4-1)	Count (Th4-2)	TPM (Th4-2)	Count (Th4-3)	TPM (Th4-3)
TRINITY_DN9213_c0_g2	79	7.54704	92	8.2388	129	12.0548	12	0.938237	7	0.636825	24	1.19564	78	7.26425	19	3.28422	13	0.955
TRINITY_DN4621_c0_g1	12	1.0366	15	1.0756	14	1.18418	151	10.6737	461	37.8503	650	29.25	45	3.32323	32	2.99131	27	1.79836
TRINITY_DN23563_c0_g1	2	2.44871	2	2.10245	4	4.84556	1	1.11447	2	2.76992	0	0	4	4.02121	0	0	1	0.770039
TRINITY_DN9213_c0_g1	0	0	0	0	0	0	3	3.95224	0	0	4	2.94354	0	0	0	0	1	0.886781
TRINITY_DN12351_c0_g1	145	10.2945	205	10.7005	383	19.5093	287	17.0679	2342	167.477	560.001	20.7656	978	49.9132	328	23.403	259	15.2105
TRINITY_DN18969_c0_g1	0	0	0	0	0	0	1	2.30236	0	0	0	0	0	0	0	0	5	7.4929
TRINITY_DN13887_c2_g4	1	0.228387	3	0.562915	1	0.22018	47	8.80692	6	1.32634	12	1.43559	16	3.06179	9	2.22658	28	4.73247
TRINITY_DN13887_c2_g2	106	4.35327	142	5.06701	150	6.34612	84	3.07635	14	0.601628	81	1.73159	69	2.4384	36	1.59939	12	0.385143
TRINITY_DN13887_c2_g3	46	4.11943	42	3.12147	54	4.73346	14	1.02599	0	0	25	1.16727	8	0.612195	11	1.06601	4	0.27594
TRINITY_DN13887_c2_g1	68	2.51459	69	1.92871	81.0001	2.99311	267	7.61059	30	1.0123	162	2.95283	73	2.88721	63	2.52043	148	4.30011
TRINITY_DN17367_c0_g1	0	0	0	0	2	2.44135	0	0	3	4.18708	0	0	0	0	0	0	0	0
TRINITY_DN16799_c0_g1	0	0	0	0	0	0	0	0	0	0	0	0	0	0	2	5.60403	0	0
TRINITY_DN957_c0_g1	1	2.63517	1	2.32552	3	8.11911	2	4.9087	0	0	0	0	6	12.9714	1	3.10865	2	3.20824
TRINITY_DN13520_c0_g1	7648.01	97.326	11632	125.495	12554	162.538	8244	84.9958	8227	98.3059	7199.01	47.5175	11402	127.178	7441	102.576	9423.01	95.3469
TRINITY_DN14280_c3_g1	363	26.5423	589.001	43.3644	803	71.4386	355	24.476	451	30.2239	544.999	22.8626	1007	64.1689	541	52.0482	377	28.7277
TRINITY_DN3863_c0_g2	1	0.9436	1	0.790975	4	3.65417	3	2.50145	1	1.035	3	1.58971	4	3.07861	0	0	1	0.607815
TRINITY_DN12185_c0_g1	310	12.1157	312	10.1573	431	16.5804	92	2.93971	30	1.10897	165	3.35653	82	2.75848	47	1.9871	14	0.427861
TRINITY_DN576_c0_g1	0	0	0	0	0	0	0	0	0	0	0	0	0	0	0	0	4	3.93206
TRINITY_DN7282_c0_g1	117	6.62484	127	5.9316	122	6.79349	34	1.53834	13	0.70232	97	2.84751	18	0.855143	8	0.478838	12	0.516626
TRINITY_DN22790_c0_g1	0	0	0	0	0	0	0	0	0	0	0	0	0	0	0	0	2	2.9681
TRINITY_DN12628_c0_g1	847	36.0052	619	21.9271	360	15.0638	1287	44.7252	804	32.2439	2294	50.6509	867	31.7106	885	40.7359	2112	70.1741
TRINITY_DN4105_c0_g1	4	0.841027	3	0.518909	6	1.21861	5	0.862245	0	0	2	0.220137	4	0.70648	0	0	2	0.312807
TRINITY_DN16273_c0_g1	14	3.62271	3	0.636399	19	4.72433	12	2.54913	3	0.754195	4	0.542747	0	0	1	0.280371	1	0.189867
TRINITY_DN13341_c0_g1	866	15.435	1243	18.487	1521	26.7629	603	8.78074	1028	17.2627	1190	11.0484	2252	34.6176	777.999	14.9785	575	8.06921
TRINITY_DN19690_c0_g1	0	0	0	0	0	0	1	1.87668	0	0	0	0	0	0	0	0	2	2.44947
TRINITY_DN9639_c1_g1	0	0	0	0	0	0	1	2.07783	0	0	1	1.27324	0	0	0	0	0	0
TRINITY_DN3640_c0_g1	0	0	0	0	1	2.25382	1	2.05829	0	0	0	0	1	1.81163	1	2.63443	0	0
TRINITY_DN22022_c0_g1	2	6.22878	0	0	0	0	1	2.8479	0	0	0	0	1	2.53037	0	0	0	0
TRINITY_DN26517_c0_g1	0	0	0	0	0	0	0	0	0	0	0	0	0	0	0	0	36	9.81763
TRINITY_DN12013_c0_g1	1676	49.3714	2816.01	69.1614	4859	141.637	1493	35.8832	2334	64.7767	3108	47.5642	7492.01	190.848	5727	183.076	3130	72.4922
TRINITY_DN739_c0_g1	3	2.50673	0	0	0	0	0	0	0	0	0	0	0	0	0	0	4	2.179
TRINITY_DN24237_c0_g1	0	0	0	0	0	0	0	0	0	0	0	0	0	0	0	0	3	4.58331
TRINITY_DN26838_c0_g1	0	0	0	0	0	0	1	2.43203	0	0	0	0	0	0	0	0	2	3.17684
TRINITY_DN4255_c0_g2	2	0.398313	6	0.983817	7	1.34828	3	0.489934	0	0	2	0.208436	0	0	0	0	0	0
TRINITY_DN11060_c0_g1	640	40.5666	490	25.8797	703	43.5971	253	13.1558	16	0.954128	233	7.73678	147	8.00008	41	2.80897	58	2.86427
TRINITY_DN4255_c0_g1	3	0.384984	3	0.318597	16	2.0012	1	0.105091	0	0	0	0	0	0	0	0	0	0
TRINITY_DN27767_c0_g1	2	6.0304	0	0	0	0	0	0	0	0	0	0	0	0	0	0	0	0
TRINITY_DN20388_c0_g1	0	0	0	0	0	0	0	0	0	0	0	0	0	0	0	0	4	4.46096
TRINITY_DN103_c0_g1	3	6.39373	0	0	5	10.9473	0	0	1	2.46277	0	0	0	0	0	0	0	0
TRINITY_DN2738_c0_g1	13	0.751265	28	1.34601	57	3.23561	14	0.661694	17	0.931298	17	0.51167	82	4.06783	28	1.75066	18	0.808882
TRINITY_DN23416_c0_g1	1	0.443677	0	0	2	0.839625	1	0.367111	0	0	1	0.235029	0	0	1	0.483614	2	0.620001
TRINITY_DN26669_c0_g1	1	0.526387	7	2.99443	1	0.497208	3	1.31719	4	2.1374	6	1.68664	1	0.427932	2	1.15624	0	0
TRINITY_DN16693_c0_g1	9	4.73748	6	2.56666	4	1.98883	16	7.02499	5	2.67175	5	1.40553	3	1.2838	0	0	5	1.805
TRINITY_DN18403_c0_g1	6	1.14371	7	1.09926	3	0.553579	3	0.468854	2	0.367289	0	0	1	0.160566	1	0.206429	0	0
TRINITY_DN26646_c0_g1	6	1.45578	1	0.199135	5	1.16775	1	0.199119	3	0.705762	0	0	2	0.405784	2	0.525707	0	0
TRINITY_DN6089_c0_g1	3	1.5068	0	0	0	0	0	0	0	0	0	0	0	0	0	0	8	2.76962
TRINITY_DN22946_c0_g1	1	2.91867	0	0	0	0	0	0	0	0	0	0	1	2.38157	0	0	2	3.55578
TRINITY_DN17141_c0_g1	45	5.21072	69	6.61806	98	11.0754	18	1.70648	9	0.994873	42	2.53786	22	2.1687	3	0.375991	13	1.15068
TRINITY_DN14850_c0_g1	3	0.856341	3	0.700704	0	0	1	0.234464	2	0.556504	2	0.299644	6	1.42377	1	0.309359	2	0.415787
TRINITY_DN6793_c0_g1	293	22.3772	410	26.026	957	71.9594	369	23.0574	4	0.291849	157	6.20312	32	2.03777	43	3.57299	97	5.70027
TRINITY_DN12434_c0_g1	4148	70.4925	5526	78.3545	5514	92.5148	643	8.93857	1840	29.5244	996	8.79587	4826	70.8836	1798	33.0614	671	8.97288
TRINITY_DN25104_c0_g1	0	0	0	0	0	0	0	0	0	0	0	0	0	0	0	0	3	6.0233
TRINITY_DN15885_c0_g1	0	0	0	0	0	0	0	0	1	3.65452	0	0	0	0	0	0	1	2.05527
TRINITY_DN22180_c0_g1	4	2.00138	1	0.406383	3	1.41796	5	2.08066	6	3.031	5	1.33221	0	0	0	0	3	1.03507
TRINITY_DN2561_c0_g1	0	0	0	0	0	0	0	0	0	0	0	0	0	0	0	0	4	5.82286
TRINITY_DN21619_c0_g1	0	0	0	0	0	0	0	0	0	0	0	0	0	0	0	0	3	4.53937
TRINITY_DN7426_c0_g1	4	1.05802	11	2.41085	13	3.33282	6	1.22591	4	0.966222	1	0.146101	5	1.09996	2	0.571433	0	0
TRINITY_DN5104_c0_g1	0	0	0	0	0	0	4	4.8212	0	0	1	0.75926	1	1.08138	0	0	3	2.46624
TRINITY_DN19674_c0_g1	0	0	0	0	2	2.5772	0	0	0	0	1	0.747577	1	1.06547	0	0	0	0
TRINITY_DN20710_c0_g1	0	0	0	0	0	0	0	0	0	0	0	0	0	0	0	0	3	4.01647
TRINITY_DN13726_c5_g1	288	6.1612	344	6.1084	276	5.77955	237	4.14458	293	5.86239	263	2.89014	367.001	6.74849	106	2.4372	150	2.48774
TRINITY_DN3297_c0_g1	44	4.83411	186	16.9341	25	2.68248	3407	306.431	1622	169.997	9236	529.413	5	0.46805	20	2.37819	21	1.76671
TRINITY_DN6117_c0_g1	1	0.750159	1	0.618129	1	0.715437	0	0	0	0	0	0	0	0	0	0	1	0.494877
TRINITY_DN6117_c0_g2	7	8.33278	2	2.03877	1	1.17525	2	2.16108	0	0	0	0	1	0.97684	0	0	0	0
TRINITY_DN18313_c0_g1	0	0	0	0	0	0	1	2.38838	0	0	1	1.45101	1	2.10156	0	0	0	0
TRINITY_DN15707_c0_g1	2	5.21921	0	0	0	0	0	0	0	0	0	0	0	0	0	0	0	0
TRINITY_DN20050_c0_g1	0	0	2	1.20958	0	0	1	0.6312	3	2.33746	0	0	0	0	0	0	0	0
TRINITY_DN17111_c0_g1	0	0	0	0	0	0	0	0	2	4.75711	0	0	0	0	0	0	0	0
TRINITY_DN26288_c0_g1	0	0	0	0	0	0	0	0	1	1.40645	0	0	0	0	1	1.47844	4	3.1202
TRINITY_DN10495_c0_g1	319	55.4576	475	68.1123	870	146.682	87	12.3966	20	3.34287	128	11.6348	71	10.4218	117	22.0247	192	25.0893
TRINITY_DN10495_c0_g2	96	10.2034	164	13.7811	146	19.7003	121	9.22658	22	1.75845	126	7.02175	76	5.4628	65	5.91189	83	5.81084
TRINITY_DN12306_c0_g1	548	20.2618	838	25.8959	508	18.5374	932	28.1406	1007	35.2202	1366	26.2606	1169	37.2981	622	24.9011	1050	30.4303
TRINITY_DN16430_c0_g1	0	0	0	0	0	0	0	0	0	0	0	0	0	0	0	0	4	6.17054
TRINITY_DN14226_c0_g1	952.864	14.4441	1110	13.9362	1195	17.5377	1965	23.6381	1132	15.8177	2099.13	16.0697	1723	22.0618	858	13.7646	936	10.9357
TRINITY_DN14226_c0_g2	63	5.63752	55	3.38974	78	6.6076	44	2.92373	31	2.56768	26	1.19382	43	2.6475	20	1.57007	46	2.69762
TRINITY_DN24648_c0_g1	0	0	0	0	0	0	0	0	0	0	0	0	0	0	0	0	3	3.77263
TRINITY_DN14270_c0_g10	1	0.302038	2	0.49374	1	0.288924	10	2.48191	2	0.59012	14	2.22089	1	0.250534	0	0	3	0.656924
TRINITY_DN9628_c0_g1	1	0.189746	4	0.468989	7	0.834801	11	1.24456	9	1.50005	13	2.12493	36	3.74402	8	1.64387	9	0.851858
TRINITY_DN8683_c1_g1	0	0	0	0	0	0	0	0	0	0	0	0	0	0	0	0	3	3.3736
TRINITY_DN9712_c0_g1	28	4.06222	20	2.17573	16	2.30685	35	3.74989	4	0.555973	15	1.06094	11	1.28666	2	0.269207	2	0.239429
TRINITY_DN1530_c0_g1	12	1.42532	7	0.688545	14	1.62243	26	2.52856	22	2.49547	50	3.0994	29	2.93114	17	2.18555	29	2.63074
TRINITY_DN14434_c0_g1	0	0	0	0	0	0	0	0	0	0	0	0	0	0	0	0	2	4.06252
TRINITY_DN6282_c0_g1	10	1.60203	1	0.13227	5	0.777986	9	1.08611	4	0.56468	5	0.384765	7	0.873931	0	0	0	0
TRINITY_DN26691_c0_g1	30	3.49658	29	2.79958	26	2.95739	7	0.667991	28	3.11573	4	0.243291	3	0.297638	1	0.126152	0	0
TRINITY_DN22133_c0_g1	0	0	0	0	0	0	2	6.09547	0	0	0	0	0	0	0	0	0	0
TRINITY_DN21785_c0_g1	0	0	2	4.32664	2	5.01278	0	0	0	0	0	0	0	0	0	0	3	4.45215
TRINITY_DN18126_c0_g1	1	1.9288	1	1.71462	1	1.97403	3	5.42827	0	0	4	4.48203	0	0	0	0	0	0
TRINITY_DN6827_c0_g1	4	9.95008	0	0	4	10.2217	0	0	0	0	1	1.41475	0	0	1	2.95316	1	1.51312
TRINITY_DN5301_c0_g1	1	3.11439	5	13.5228	1	3.17338	3	8.54371	0	0	3	5.1504	2	5.06074	0	0	14	26.5694
TRINITY_DN10516_c0_g1	13	1.10252	12	0.858895	19.0001	1.60997	21	1.46307	20	1.56229	11	0.492831	66	4.81125	12	1.08995	23	1.43581
TRINITY_DN11146_c0_g1	109	9.56177	149	10.8489	138	11.8518	45	3.23031	9	0.751132	56	2.46962	14	1.11641	4	0.363073	5	0.338058
TRINITY_DN11945_c0_g1	2154	59.8041	2802	64.7607	3482	95.5672	3369	76.2005	3593	94.448	4087	59.0287	10729	257.812	3999	120.225	4162	90.788
TRINITY_DN22066_c0_g1	0	0	1	2.78341	0	0	1	2.92904	0	0	0	0	0	0	0	0	0	0
TRINITY_DN12678_c0_g1	2323	124.823	2098	93.8698	1601	84.8656	562	24.3983	64.0001	3.24499	183	5.03145	465.999	21.4976	313	18.0298	1160	48.5779
TRINITY_DN22447_c0_g1	0	0	0	0	0	0	0	0	0	0	0	0	0	0	2	5.95704	0	0
TRINITY_DN3198_c0_g1	5	0.379508	5	0.315272	3	0.22322	11	0.683074	9	0.648984	20	0.791106	49	3.18432	27	2.2175	47	2.75916
TRINITY_DN11466_c0_g1	334	12.9198	365	11.7612	345	13.1365	72	2.27703	96	3.51214	153	3.08046	328	10.9214	287	12.0096	482	14.5813
TRINITY_DN10227_c0_g1	651	76.9527	1200	117.51	1299	149.901	904	87.2674	968	109.015	1274	78.5787	1882	189.483	897	114.877	1042	93.9553
TRINITY_DN11466_c0_g2	0	0	2	0.177578	0	0	3	0.263077	2	0.204315	11	0.614734	14	1.27833	12	1.39128	9	0.738858
TRINITY_DN25679_c0_g1	68	5.16446	62	3.91174	146	10.8699	108	6.71065	80	5.7723	117	4.6308	459	29.8466	150	12.327	107	6.28523
TRINITY_DN8239_c0_g1	46	4.50788	55	4.45461	54	5.188	176	14.0486	102	9.46225	138	6.98777	163	13.5874	80	8.4917	112	8.43725
TRINITY_DN9996_c0_g1	14	0.833281	26	1.30601	18	1.03343	4	0.188617	14	0.788406	12	0.377509	33	1.69758	9	0.588114	13	0.61008
TRINITY_DN11427_c0_g2	7	0.784292	16	1.4853	16	1.75036	21	1.92625	6	0.641465	42	2.45531	45	4.29453	17	2.06152	6	0.514441
TRINITY_DN10227_c0_g2	145	5.92173	261	8.87774	551	22.1452	161	5.37589	273	10.5474	289	6.14363	879	30.8908	300	13.2539	151	4.81968
TRINITY_DN20156_c0_g1	1	2.66166	0	0	0	0	0	0	0	0	0	0	0	0	0	0	3	4.86053
TRINITY_DN27672_c0_g1	0	0	0	0	0	0	0	0	0	0	2	2.75618	0	0	0	0	0	0
TRINITY_DN16005_c0_g1	0	0	0	0	2	5.25846	0	0	0	0	0	0	0	0	0	0	0	0
TRINITY_DN13077_c0_g3	1	0.113265	2	0.187673	7	0.774041	79	7.32566	20	2.16189	35	2.06852	16	1.54335	6	0.735546	21	1.81955
TRINITY_DN13077_c0_g2	3517	94.1273	4786	106.419	3938	104.065	4984	107.257	3941	99.0845	6641	91.4562	4126	95.0675	5214	151	5909	124.179
TRINITY_DN13077_c0_g5	20	1.72647	39	2.79464	13	1.09884	264	18.6484	86	7.0618	243	10.9355	53	3.91134	29	2.70899	93	6.19015
TRINITY_DN13077_c0_g4	23	3.11873	21	2.35526	8	1.05644	26	2.88753	5	0.648794	7	0.495642	9	1.036	7	1.02749	9	0.927492
TRINITY_DN27951_c0_g1	0	0	0	0	0	0	0	0	2	6.63485	0	0	0	0	0	0	0	0
TRINITY_DN13936_c2_g1	1048	28.127	1176	26.3509	1445	38.2465	810	17.7371	163	4.13256	624	8.71943	1307	30.2493	638	18.5387	663	13.9416
TRINITY_DN17540_c0_g1	0	0	0	0	0	0	0	0	2	6.57482	0	0	0	0	0	0	0	0
TRINITY_DN20017_c0_g1	0	0	0	0	0	0	1	2.77014	0	0	1	1.67061	1	2.45664	0	0	0	0
TRINITY_DN1995_c0_g1	0	0	0	0	0	0	0	0	9	12.5895	0	0	0	0	0	0	0	0
TRINITY_DN6926_c0_g1	518	15.5561	596	14.9191	1489	44.0591	2228	54.6945	1013	28.7422	1292	20.1894	3438	88.9845	3890	126.366	3406	80.2017
TRINITY_DN1640_c0_g1	2	0.2855	4	0.601792	8	1.24357	14	1.88649	0	0	9	0.755526	36	4.89723	16	3.02813	11	1.39857
TRINITY_DN19378_c0_g1	0	0	0	0	1	0.391852	1	0.34136	4	1.64278	0	0	7	2.37014	4	1.79929	5	1.45528
TRINITY_DN27542_c0_g1	0	0	0	0	0	0	0	0	0	0	0	0	0	0	0	0	2	2.65324
TRINITY_DN24278_c0_g1	0	0	0	0	0	0	0	0	0	0	0	0	0	0	0	0	3	3.34572
TRINITY_DN22816_c0_g1	0	0	0	0	0	0	0	0	0	0	0	0	0	0	2	5.17615	0	0
TRINITY_DN27305_c0_g1	0	0	0	0	0	0	3	5.23945	0	0	1	1.08391	0	0	0	0	1	1.14343
TRINITY_DN6393_c0_g1	9	0.743896	8	0.549046	25	2.02417	9	0.608682	4	0.314358	15	0.646268	22	1.5554	9	0.804973	5	0.319006
TRINITY_DN13822_c2_g1	188	10.4818	242	11.2338	432	23.6508	73	3.31429	63	3.34647	143.383	4.16995	487.79	23.3167	130	7.7668	68	2.86929
TRINITY_DN13822_c2_g3	831	17.2351	1193.23	20.6306	1733	35.4313	638	10.8064	453	8.85807	737	7.94714	1628	29.1223	939	21.0522	716	11.6692
TRINITY_DN16547_c0_g1	0	0	0	0	1	0.182069	4	0.61661	18	3.25963	18	1.77043	2	0.316882	0	0	0	0
TRINITY_DN2718_c0_g1	2	0.56959	5	1.30888	1	0.30617	4	0.935699	0	0	2	0.337093	6	1.42064	0	0	8	1.85035
TRINITY_DN18259_c0_g1	0	0	0	0	0	0	0	0	0	0	0	0	0	0	0	0	2	2.3457
TRINITY_DN2473_c0_g1	0	0	1	2.43549	0	0	0	0	1	3.12151	0	0	1	2.26901	1	3.24989	0	0
TRINITY_DN7987_c0_g1	0	0	1	0.756053	1	0.873573	0	0	0	0	1	0.506293	2	1.47487	0	0	1	0.585399
TRINITY_DN3450_c0_g1	12	1.86951	6	0.828382	14	2.23929	6	0.822665	10	1.5855	5	0.407032	7	0.989752	7	1.26807	4	0.497606
TRINITY_DN7987_c0_g2	6	1.71368	0	0	2	0.492325	2	0.420464	0	0	3	0.402836	6	1.45226	1	0.332263	0	0
TRINITY_DN27372_c0_g1	1	1.87885	0	0	0	0	0	0	0	0	2	2.186	0	0	0	0	0	0
TRINITY_DN9903_c0_g1	87	4.794	99	4.52947	148	8.0156	39	1.75117	80	4.12913	105	3.02274	191	9.06554	56	3.33512	73	3.11208
TRINITY_DN22908_c0_g1	4	12.3244	0	0	0	0	0	0	0	0	0	0	0	0	0	0	0	0
TRINITY_DN25793_c0_g1	1	2.71682	0	0	0	0	0	0	0	0	0	0	0	0	2	6.38618	0	0
TRINITY_DN3556_c0_g1	0	0	0	0	0	0	0	0	0	0	0	0	4	7.38374	0	0	1	1.36366
TRINITY_DN19308_c0_g1	0	0	0	0	0	0	0	0	0	0	0	0	0	0	0	0	4	7.76273
TRINITY_DN4090_c0_g1	24	1.07232	22	0.818457	37	1.62622	117	4.2744	47	1.98754	121	2.8145	147	5.64873	67	3.23849	75	2.616
TRINITY_DN26493_c0_g1	0	0	1	0.790975	0	0	0	0	1	1.035	0	0	4	3.07861	0	0	0	0
TRINITY_DN3980_c0_g1	3	7.60812	0	0	1	2.60429	0	0	0	0	0	0	0	0	0	0	0	0
TRINITY_DN18498_c0_g1	8	1.1265	8	0.931395	5	0.685275	6	0.692049	3	0.404505	5	0.367711	0	0	0	0	5	0.53428
TRINITY_DN15748_c0_g1	0	0	0	0	1	3.30195	0	0	0	0	2	3.55957	0	0	0	0	0	0
TRINITY_DN456_c0_g1	0	0	0	0	0	0	0	0	4	9.43249	0	0	2	3.37079	0	0	0	0
TRINITY_DN17292_c0_g1	0	0	0	0	1	1.06846	0	0	1	1.21807	2	1.24105	2	1.78587	1	1.28348	0	0
TRINITY_DN19035_c0_g1	1	2.07318	0	0	2	4.25537	0	0	0	0	1	1.19893	0	0	0	0	0	0
TRINITY_DN1074_c0_g1	20	4.48986	21	4.09241	22	4.55861	2	0.409461	1	0.242054	3	0.392255	4	0.608704	1	0.195347	0	0
TRINITY_DN24255_c0_g1	1	2.32248	0	0	0	0	0	0	0	0	0	0	0	0	1	2.77791	4	5.6593
TRINITY_DN3571_c0_g1	15	1.76606	13	1.25751	19	2.15817	7	0.680116	4	0.453283	7	0.433501	21	2.12056	6	0.770635	12	1.08758
TRINITY_DN18250_c0_g1	2	6.65102	0	0	0	0	0	0	0	0	0	0	0	0	0	0	0	0
TRINITY_DN26047_c0_g1	0	0	0	0	0	0	0	0	0	0	0	0	0	0	1	0.580575	10	3.62288
TRINITY_DN8868_c0_g1	0	0	1	1.19241	0	0	0	0	0	0	0	0	0	0	2	3.29654	5	4.2821
TRINITY_DN18837_c0_g1	0	0	1	0.714759	0	0	2	1.50187	1	0.930834	2	0.956389	2	1.39879	0	0	0	0
TRINITY_DN11017_c0_g1	182	8.37572	246	9.4388	264	11.9847	172	6.47033	15	0.657086	94	2.26462	17	0.676413	21	1.05129	41	1.48041
TRINITY_DN22874_c0_g1	2	5.32333	0	0	0	0	0	0	0	0	0	0	0	0	0	0	0	0
TRINITY_DN1713_c0_g1	24	10.2225	14	4.84531	8	3.22702	42	14.7819	11	4.66414	29	6.53378	7	2.43883	7	3.24607	12	3.58681
TRINITY_DN19766_c0_g1	0	0	1	0.507047	0	0	2	1.04938	8	5.14805	2	0.671309	0	0	0	0	0	0
TRINITY_DN15224_c0_g1	2	4.34446	0	0	0	0	0	0	0	0	0	0	0	0	0	0	2	2.65324
TRINITY_DN10136_c0_g1	607	60.888	514	41.0355	887	81.5755	549	45.7607	1080	96.9664	1832	95.2374	336	26.8325	157	15.4114	173	12.8244
TRINITY_DN6555_c0_g1	1	2.71682	0	0	0	0	0	0	0	0	0	0	0	0	1	3.19309	2	2.93932
TRINITY_DN9498_c0_g1	60	3.17009	88	3.86902	202	10.4892	93	4.0183	86	4.30476	171	4.70475	291	13.2076	122	6.97362	74	3.04478
TRINITY_DN5938_c0_g1	1	0.716698	2	1.17758	0	0	3	1.84141	0	0	1	0.391982	5	2.90889	0	0	0	0
TRINITY_DN10661_c0_g2	18	1.41811	19	1.24326	14	1.08091	28	1.80486	8	0.59899	31	1.2729	7	0.471982	4	0.341001	3	0.182648
TRINITY_DN2687_c0_g1	3	0.817037	3	0.764182	5	1.49009	3	0.73267	0	0	2	0.327711	1	0.258342	2	0.633223	1	0.22548
TRINITY_DN10324_c0_g1	485	26.1578	698	31.3241	795	42.1351	510	22.4946	409	20.9012	615	17.2731	1167	54.0594	503	29.3501	329	13.8139
TRINITY_DN8592_c0_g1	4	1.86069	0	0	5	1.79399	11	3.42272	35	13.9496	5	0.995459	0	0	1	0.41017	4	1.39932
TRINITY_DN22196_c0_g1	0	0	0	0	0	0	0	0	0	0	1	1.32997	1	1.91525	0	0	0	0
TRINITY_DN14196_c3_g1	2	5.83733	0	0	0	0	0	0	0	0	0	0	1	2.60669	0	0	0	0
TRINITY_DN7705_c0_g1	2	0.527392	6	1.2966	6	1.51952	2	0.432994	2	0.51269	0	0	4	0.87946	0	0	0	0
TRINITY_DN7705_c0_g2	9	0.951831	7	0.613664	13	1.34335	3	0.259718	5	0.504195	7	0.386191	18	1.62294	5	0.572305	1	0.0810815
TRINITY_DN17672_c0_g1	0	0	0	0	0	0	0	0	0	0	0	0	1	1.38121	0	0	2	2.05985
TRINITY_DN23566_c0_g1	0	0	0	0	0	0	0	0	0	0	0	0	0	0	0	0	4	3.20225
TRINITY_DN18831_c0_g1	260	18.316	241	14.1095	222	15.3403	644	37.1129	84	5.61813	559	20.5185	225	13.5816	149	11.3573	278	15.1716
TRINITY_DN15765_c0_g1	0	0	0	0	0	0	0	0	0	0	0	0	0	0	0	0	4	3.90221
TRINITY_DN17627_c0_g1	0	0	0	0	0	0	0	0	0	0	0	0	0	0	0	0	3	5.39105
TRINITY_DN8496_c0_g1	2	2.30069	4	3.92739	2	2.26451	1	1.0398	1	1.29263	1	0.65773	0	0	0	0	0	0
TRINITY_DN5866_c0_g1	4	7.64788	0	0	0	0	0	0	0	0	0	0	0	0	0	0	4	4.69141
TRINITY_DN9792_c0_g1	10	9.66792	5	4.06095	5	4.68937	0	0	0	0	0	0	0	0	0	0	2	1.24258
TRINITY_DN1968_c0_g1	0	0	0	0	0	0	0	0	4	10.7566	0	0	0	0	0	0	0	0
TRINITY_DN13787_c0_g3	130	5.91889	119	4.51103	194	8.68801	81	3.01553	355	15.2994	272	6.44733	926	36.2555	476	23.4455	655	23.275
TRINITY_DN13787_c0_g2	27	1.24065	37	1.41549	39	1.7626	21	0.789025	217	9.4388	51	1.22005	75	2.96338	52	2.58492	102	3.65749
TRINITY_DN13787_c0_g1	84.0001	2.81851	138	3.28932	190	5.66614	91.9999	2.97922	115	4.25212	180	3.76745	355	10.9421	223	9.01051	286	8.32156
TRINITY_DN18408_c0_g1	258	31.1497	315	31.4909	740	87.1524	315	31.1407	259	29.87	179	11.2796	815	83.7101	287	37.5061	241	22.2101
TRINITY_DN24003_c0_g1	0	0	0	0	0	0	0	0	0	0	0	0	0	0	0	0	3	3.73954
TRINITY_DN536_c0_g1	2	6.09615	0	0	0	0	0	0	0	0	0	0	0	0	1	3.5196	1	1.85674
TRINITY_DN15425_c0_g1	2	3.9627	0	0	0	0	0	0	1	2.29727	0	0	0	0	0	0	1	1.21407
TRINITY_DN8692_c0_g1	1791	136.023	1901	119.939	2657	197.818	838	51.8832	1963	141.638	1752	69.3433	3788	246.121	2112	173.235	1723	100.857
TRINITY_DN3063_c0_g1	7	3.69953	6	2.57708	3	1.49759	4	1.76371	3	1.61018	4	1.1292	2	0.859218	0	0	5	1.81144
TRINITY_DN13030_c0_g1	207	4.48203	297	5.36357	406	8.66969	245	4.33571	520	10.6269	575	6.47181	774	14.4613	376	8.78906	144	2.45091
TRINITY_DN15352_c0_g1	0	0	0	0	0	0	1	0.548896	1	0.674383	1	0.351	3	1.57605	1	0.722116	0	0
TRINITY_DN22289_c0_g1	0	0	0	0	0	0	0	0	0	0	0	0	0	0	0	0	3	4.05365
TRINITY_DN12016_c0_g1	1775	70.9766	2724	90.7261	4707	185.246	1202	39.2969	1306	49.399	2182	45.4156	7152	246.126	6322	273.47	4737	148.078
TRINITY_DN18294_c0_g1	0	0	0	0	0	0	0	0	0	0	0	0	0	0	3	8.04587	2	2.72731
TRINITY_DN12016_c0_g2	2187	76.6415	2919	85.3194	3777	134.318	2047	60.7755	1243	42.4077	2441	46.4043	3682	117.782	1736	68.8057	1965	55.8581
TRINITY_DN24156_c0_g1	0	0	0	0	0	0	0	0	0	0	0	0	0	0	0	0	4	7.85076
TRINITY_DN27316_c0_g1	0	0	0	0	0	0	0	0	0	0	0	0	0	0	0	0	3	3.08977
TRINITY_DN10859_c0_g1	94	1.86742	168	2.79467	390	7.68614	123	2.02737	272	5.14634	282	2.9266	574	9.96805	201	4.33558	145	2.27396
TRINITY_DN19587_c0_g1	1	1.78381	0	0	0	0	1	1.67066	0	0	1	1.03905	2	2.95566	0	0	0	0
TRINITY_DN21489_c0_g1	2	6.16219	0	0	0	0	0	0	0	0	0	0	0	0	0	0	0	0
TRINITY_DN19110_c0_g1	3	0.55818	3	0.459996	1	0.180203	2	0.305068	3	0.537458	2	0.194643	5	0.784134	1	0.201487	3	0.418091
TRINITY_DN14991_c0_g1	0	0	0	0	0	0	2	5.38478	1	3.2578	0	0	0	0	0	0	0	0
TRINITY_DN12731_c0_g1	306	15.986	328	14.2326	291	15.1086	643	27.627	217	10.9363	743	20.539	258	11.8994	123	7.02951	154	6.30045
TRINITY_DN14310_c1_g1	189	20.8184	317	28.9887	567	60.7315	346	31.1382	343	36.4928	284	16.276	1018	96.2299	370	43.7426	464	39.4487
TRINITY_DN23994_c0_g1	3	1.00043	3	0.816113	2	0.636063	3	0.822845	2	0.654345	10	1.75393	11	3.03059	3	1.08515	3	0.71915
TRINITY_DN15573_c0_g1	0	0	0	0	0	0	0	0	0	0	0	0	0	0	0	0	4	5.99432
TRINITY_DN7321_c0_g1	0	0	3	1.10009	1	0.522159	4	1.49523	0	0	0	0	3	1.26639	1	0.492401	2	0.629743
TRINITY_DN13061_c0_g1	3523	147.827	4748.01	177.398	3432	139.571	2068	75.0442	1093	43.2946	2814.99	59.146	4079	139.628	2397	106.997	1810	59.2937
TRINITY_DN3288_c0_g1	6	1.50263	10	2.05429	9	2.16777	22	4.52228	10	2.43058	28	3.6759	11	2.30114	7	1.89931	2	0.368373
TRINITY_DN21960_c0_g1	0	0	1	2.73049	2	6.40821	0	0	0	0	0	0	0	0	0	0	0	0
TRINITY_DN3291_c0_g1	0	0	0	0	0	0	3	7.78271	2	6.29523	1	1.56927	0	0	0	0	0	0
TRINITY_DN11058_c0_g1	155	9.87984	94	4.9919	57	3.58796	314	16.3729	1217	73.4706	716	23.7439	123	6.72654	413	28.4575	1302	64.4535
TRINITY_DN13362_c0_g1	3936	177.595	5212.01	193.392	7279	337.739	2640	104.39	462	22.0576	3150	77.7608	1884	81.8067	1052	54.1711	879.001	34.4375
TRINITY_DN14374_c0_g1	2	0.644612	3	0.789299	4	1.2308	1	0.264999	0	0	3	0.508283	0	0	0	0	0	0
TRINITY_DN25900_c0_g1	3	0.880525	1	0.240035	2	0.562019	2	0.482268	0	0	1	0.154102	4	0.974937	1	0.318131	0	0
TRINITY_DN6112_c0_g1	0	0	0	0	0	0	0	0	3	8.80607	0	0	0	0	0	0	0	0
TRINITY_DN26306_c0_g1	0	0	0	0	1	2.32	0	0	0	0	0	0	0	0	0	0	0	0
TRINITY_DN14100_c4_g1	14	6.10564	15	5.31438	10	4.12805	35	12.6226	6	2.60972	16	3.69405	3	1.06929	0	0	12	3.66337
TRINITY_DN25080_c0_g1	0	0	0	0	1	1.68035	1	1.5459	1	1.91556	0	0	0	0	0	0	1	1.02188
TRINITY_DN24644_c0_g1	12	4.68582	3	0.952999	1	0.370667	8	2.57576	3	1.15925	2	0.412086	2	0.641039	0	0	2	0.553014
TRINITY_DN25814_c0_g1	1	2.34526	3	6.25107	0	0	0	0	0	0	1	1.34166	0	0	0	0	0	0
TRINITY_DN16556_c0_g1	91	17.1104	106	16.4227	132	24.0331	246	37.9215	275	49.7999	229	22.5238	179	28.361	146	29.7285	394	55.4586
TRINITY_DN20923_c0_g1	3	2.76409	0	0	1	0.890367	0	0	0	0	0	0	0	0	2	2.13005	4	2.3794
TRINITY_DN10775_c0_g1	5	0.72203	7	0.835551	5	1.48295	57	6.65586	19.0001	2.91792	39	3.32166	60.0001	9.34044	17	2.61731	14	1.80257
TRINITY_DN5689_c0_g2	10	1.05759	11	0.964329	30	3.10004	13	1.12545	32	3.22685	59	3.25504	12	1.08196	4	0.457844	1	0.0810815
TRINITY_DN5689_c0_g1	1	1.35424	0	0	0	0	0	0	2	3.09229	0	0	1	1.11434	0	0	0	0
TRINITY_DN10420_c0_g1	25	1.04118	11	0.382413	31	1.27337	110	3.76526	31	1.19848	174	3.79601	138	4.93035	47	2.11296	37	1.26396
TRINITY_DN19278_c0_g1	0	0	0	0	0	0	0	0	0	0	0	0	0	0	0	0	3	3.90873
TRINITY_DN12444_c0_g1	53	2.31713	37	1.34946	78	3.47782	68	2.54322	97	4.11365	156	3.63006	176	6.75985	82.0001	3.88113	62	2.1205
TRINITY_DN20154_c0_g1	7	1.70505	9	1.79911	12	2.81328	13	2.59872	10	2.36202	17	2.17016	7	1.42561	8	2.11107	7	1.25642
TRINITY_DN17877_c0_g1	0	0	0	0	0	0	0	0	0	0	1	1.7323	0	0	0	0	4	7.6761
TRINITY_DN22361_c0_g1	0	0	2	2.79613	0	0	0	0	0	0	0	0	0	0	0	0	4	3.93206
TRINITY_DN11314_c0_g1	10	1.09287	26	2.35476	96	10.1864	13	1.16307	10	1.04248	25	1.39315	73	6.7794	31	3.64776	12	1.0044
TRINITY_DN11314_c0_g2	3	1.05079	4	1.14186	17	5.67019	2	0.576523	3	1.03339	1	0.184375	8	2.3103	5	1.90045	0	0
TRINITY_DN16062_c0_g1	323	33.7586	593	51.3797	253	25.8399	101	8.64087	62	6.17759	156	8.50503	60	5.34717	12	1.35737	32	2.56505
TRINITY_DN17155_c0_g1	0	0	0	0	0	0	0	0	1	3.20054	2	3.19299	1	2.33506	0	0	1	1.7408
TRINITY_DN12859_c1_g1	10680	198.021	12525	193.67	8372	153.095	10609	160.764	6970	121.939	17927	173.124	8093	129.876	5639	113.07	8203	119.714
TRINITY_DN17358_c0_g1	2	2.1386	0	0	0	0	0	0	0	0	0	0	0	0	0	0	4	2.7229
TRINITY_DN13206_c0_g1	401	11.2012	429.001	9.95648	614	17.0029	347	7.95006	421	11.1564	597.999	8.63188	1154	27.8712	381	11.4612	238	5.18664
TRINITY_DN13464_c0_g4	11	28.9869	1	2.32552	0	0	1	2.45435	3	8.9613	1	1.48925	0	0	11	34.1952	3	4.81237
TRINITY_DN13464_c0_g1	134	19.907	12	1.19414	9	0.945741	25	2.19197	6	0.548278	11	0.514731	10	1.12966	75	19.9407	324	19.4841
TRINITY_DN13464_c0_g3	1	0.706065	0	0	0	0	0	0	0	0	0	0	1	0.57308	1	0.793946	7	3.28117
TRINITY_DN13464_c0_g2	9	1.05292	1	0.096897	1	0.114168	2	0.191574	0	0	0	0	0	0	3	0.379881	26	2.32434
TRINITY_DN10061_c0_g1	143	26.1764	139	20.8416	292	51.8907	122	17.5873	180	31.1564	150	14.2577	511	78.6456	137	27.0838	127	16.9962
TRINITY_DN21570_c0_g1	2	5.16957	0	0	0	0	0	0	0	0	0	0	0	0	0	0	0	0
TRINITY_DN9993_c0_g1	11	0.764099	15	0.865998	19	1.29473	19	1.07965	30	1.97825	46	1.66485	83	4.9409	35	2.6306	28	1.5072
TRINITY_DN4563_c0_g1	0	0	0	0	0	0	1	1.45611	5	9.03361	0	0	0	0	1	1.89201	0	0
TRINITY_DN4182_c0_g1	2	3.14592	0	0	1	1.45385	1	1.58674	0	0	0	0	0	0	5	9.89765	3	3.13842
TRINITY_DN19660_c0_g1	2	5.54667	0	0	0	0	0	0	0	0	0	0	0	0	0	0	0	0
TRINITY_DN14390_c0_g1	1	3.32551	1	2.86461	0	0	0	0	1	3.62099	1	1.81363	0	0	0	0	0	0
TRINITY_DN13783_c7_g1	0	0	0	0	0	0	0	0	0	0	0	0	0	0	0	0	4	7.34632
TRINITY_DN10676_c0_g1	223	10.0508	409	15.3997	459	20.4796	195	7.47989	10	0.439042	61.0001	1.44317	117	4.53891	59	2.87566	37	1.26678
TRINITY_DN2895_c0_g1	5	16.8171	0	0	0	0	0	0	0	0	0	0	0	0	0	0	0	0
TRINITY_DN12626_c0_g1	414	14.1678	483.001	14.6991	367	12.2989	676	19.0788	193	6.95762	444	8.18988	386	12.2689	213	8.32854	180	5.20869
TRINITY_DN24584_c0_g1	0	0	0	0	0	0	0	0	0	0	0	0	0	0	0	0	5	3.95104
TRINITY_DN8675_c0_g1	0	0	1	0.214319	4	1.00474	3	0.644008	7	1.77886	2	0.274248	6	1.30851	0	0	1	0.191714
TRINITY_DN8675_c0_g2	1	0.186898	5	0.770065	17	2.92981	3	0.409675	35	6.04312	7	0.652264	9	1.39421	0	0	3	0.419873
TRINITY_DN25607_c0_g1	4	4.19499	0	0	0	0	0	0	0	0	0	0	0	0	0	0	6	4.0132
TRINITY_DN22261_c0_g1	0	0	0	0	3	4.99652	1	1.53241	0	0	0	0	1	1.35826	0	0	0	0
TRINITY_DN4843_c0_g1	1	2.91867	0	0	0	0	0	0	0	0	0	0	0	0	0	0	5	8.88946
TRINITY_DN5511_c0_g1	2	3.75769	0	0	3	5.76268	0	0	0	0	0	0	0	0	0	0	0	0
TRINITY_DN6874_c0_g1	49	6.97256	109	12.7852	43	5.97372	31	3.59875	35	4.69793	31	2.27623	53	6.33679	20	3.1014	28	3.02814
TRINITY_DN23689_c0_g1	2	5.66075	0	0	0	0	0	0	0	0	0	0	0	0	0	0	0	0
TRINITY_DN20837_c0_g1	1	1.59037	0	0	1	1.60857	0	0	2	3.67354	0	0	0	0	0	0	0	0
TRINITY_DN27019_c0_g1	0	0	0	0	0	0	0	0	0	0	0	0	0	0	0	0	8	6.2404
TRINITY_DN11442_c0_g1	521.999	14.3261	418	9.40174	264	7.10413	391	8.72437	129	3.36052	226	3.2274	199	4.67302	57.0001	1.66667	82	1.73009
TRINITY_DN6187_c0_g1	0	0	0	0	0	0	0	0	0	0	0	0	0	0	1	2.95316	3	4.53937
TRINITY_DN19066_c0_g1	1	0.346392	0	0	1	0.329965	0	0	0	0	0	0	0	0	2	0.751696	65	16.1289
TRINITY_DN25147_c0_g1	0	0	0	0	0	0	0	0	0	0	0	0	0	0	0	0	2	2.38643
TRINITY_DN20876_c0_g1	182	10.6763	193	9.41716	222	12.7906	96	4.60583	83	4.61598	95	2.90254	86	4.33006	55	3.49067	68	3.10105
TRINITY_DN21911_c0_g1	0	0	0	0	0	0	0	0	0	0	0	0	0	0	0	0	3	5.27752
TRINITY_DN28020_c0_g1	0	0	0	0	1	2.87047	0	0	0	0	0	0	0	0	0	0	1	1.70506
TRINITY_DN27997_c0_g1	0	0	0	0	0	0	0	0	0	0	0	0	0	0	0	0	2	3.71347
TRINITY_DN21170_c0_g1	0	0	0	0	0	0	0	0	0	0	0	0	0	0	0	0	3	3.34572
TRINITY_DN737_c0_g1	5	6.29643	0	0	1	1.24921	0	0	0	0	0	0	0	0	0	0	0	0
TRINITY_DN11578_c0_g1	740	100.342	1196	136.672	1515	205.654	775	86.0456	542	73.5832	724	52.0671	1417	164.09	680	99.6563	597	63.1919
TRINITY_DN24331_c0_g1	2	6.36454	0	0	0	0	0	0	0	0	0	0	0	0	0	0	0	0
TRINITY_DN11727_c0_g1	86	10.53	66.9999	6.68212	185	22.0533	167	16.4331	101	11.6437	92	5.78216	377	39.0759	153	20.0932	180	16.5162
TRINITY_DN20970_c0_g1	0	0	0	0	0	0	0	0	0	0	0	0	1	2.71994	1	3.81851	4	8.22108
TRINITY_DN12090_c0_g1	140	17.9685	93	9.0854	83	9.56943	44.0001	4.37955	39	3.98029	68	4.49824	25	1.79053	13	1.50377	8	0.903184
TRINITY_DN12599_c0_g1	794	12.5857	1033	13.6721	1679	26.2591	661	8.55052	1447	21.6384	1498	12.3326	2081	28.4626	770	13.187	545	6.80436
TRINITY_DN1981_c0_g1	485	69.7134	724	85.9864	1510	210.722	549	64.5126	546	74.9462	566	42.4339	1658	201.535	700	108.65	523	56.8808
TRINITY_DN14886_c0_g1	3	3.47447	2	1.97834	2	2.28127	0	0	0	0	2	1.3251	0	0	0	0	0	0
TRINITY_DN8225_c0_g1	236	29.8781	212	22.1127	362	44.6869	233	23.9184	143	17.2314	221	14.518	483	51.9109	194	26.5777	187	17.8318
TRINITY_DN12805_c0_g1	0	0	0	0	0	0	0	0	0	0	0	0	0	0	0	0	392	12.5813
TRINITY_DN23637_c0_g1	0	0	0	0	2	1.31512	0	0	0	0	0	0	2	1.12363	1	0.776937	0	0
TRINITY_DN4437_c0_g1	1	0.803872	1	0.665282	0	0	0	0	0	0	1	0.444515	1	0.653567	0	0	3	1.57885
TRINITY_DN9220_c0_g1	3724	233.296	2349	122.368	1808	111.197	1120	57.3897	2079	123.537	1838	59.9798	2206	118.549	1786	121.056	3853	187.427
TRINITY_DN9220_c0_g2	43	2.42748	80	3.75716	157	8.70727	32	1.47742	67	3.58494	53	1.55824	300	14.5409	99	6.0466	56	2.4593
TRINITY_DN14182_c0_g1	191	17.4506	264	17.7097	371	37.2617	30	1.92402	31.0001	2.88883	37	2.12807	421	34.2845	153	13.9599	72	6.06302
TRINITY_DN10204_c0_g1	218	8.54846	264	8.60907	432	16.5814	108	3.44153	165	6.12015	170	3.4444	738	24.8792	201	8.47634	129	4.00422
TRINITY_DN6942_c0_g1	5	1.55029	0	0	4	1.19496	8	2.05148	0	0	0	0	0	0	0	0	0	0
TRINITY_DN11935_c0_g1	54	2.07627	50	1.60478	153	5.82249	32	1.00713	12	0.439566	87	1.74984	117	3.90056	72	3.00718	24	0.726935
TRINITY_DN8500_c0_g1	52	5.07898	16	1.34802	5	0.510247	133	10.7456	32	2.98662	48	2.42867	25	2.10234	20	2.09996	53	3.95242
TRINITY_DN13873_c0_g1	995.001	74.3315	1284	79.6531	1599	116.531	1041	63.1504	759	52.8684	1269	48.3566	3193	201.779	1040	81.2626	1350	78.8392
TRINITY_DN13598_c0_g1	431	5.37311	579	6.04017	257	3.16303	299	3.04604	189	2.22143	547	3.54441	177	1.90664	167	2.2497	84	0.831924
TRINITY_DN9924_c0_g1	2093	67.0617	2561	68.3875	2232	70.4484	1437	37.6387	1468	44.4503	2764	46.143	1959	54.0817	996	34.5207	932	23.42
TRINITY_DN14477_c0_g1	0	0	0	0	0	0	0	0	0	0	0	0	0	0	0	0	3	5.88807
TRINITY_DN6566_c0_g1	2	0.528511	0	0	1	0.253775	3	0.570553	4	1.02763	1	0.138593	3	0.660943	1	0.286333	0	0
TRINITY_DN23490_c0_g1	0	0	1	1.44724	0	0	0	0	0	0	3	2.8722	0	0	0	0	0	0
TRINITY_DN15021_c0_g1	0	0	0	0	2	2.12183	0	0	1	1.20913	4	2.46455	2	1.77393	0	0	0	0
TRINITY_DN3487_c0_g1	18	3.42588	27	4.23359	15	2.76375	7	1.09231	9	1.65021	14	1.39395	23	3.68752	6	1.23668	10	1.42386
TRINITY_DN23083_c0_g1	2	0.424095	9	1.56978	1	0.204792	2	0.347847	0	0	4	0.44405	6	1.06848	2	0.459343	1	0.157655
TRINITY_DN7358_c0_g1	149	18.3973	197	20.1472	609	73.2939	393	39.7493	233	27.515	266	17.1172	802	84.3127	276	36.7257	291	27.1532
TRINITY_DN20379_c0_g1	0	0	0	0	0	0	0	0	0	0	0	0	0	0	0	0	3	4.86053
TRINITY_DN13048_c0_g2	55	4.18482	62.9999	4.03011	85	6.42404	48	3.00786	89	6.47966	81.0001	3.26709	68	4.49163	45	3.7624	46	2.74168
TRINITY_DN13048_c0_g1	121	5.33143	165	6.10494	197	8.47359	88	3.2094	244	10.2647	168	3.92171	353	13.6336	148	7.14654	213	7.3764
TRINITY_DN7742_c0_g1	952	146.809	1349	171.833	1970	295.074	1510	190.678	543	80.2957	1095	88.185	1847	241.034	1040	173.537	1366	159.208
TRINITY_DN12527_c0_g1	37	2.42373	44.0001	2.45165	76	4.96242	31	1.64915	24	1.59397	41	1.45876	73.0001	4.13595	26	1.85554	20	1.09209
TRINITY_DN19512_c0_g1	1	1.61619	1	1.42241	3	4.90927	5	7.52992	0	0	0	0	2	2.67185	1	1.95514	2	1.9965
TRINITY_DN18994_c0_g1	49	8.54242	40	5.75164	30	5.07191	24	3.42936	8	1.34097	21	1.93205	27.9999	4.20246	16	3.0508	13	1.70327
TRINITY_DN24353_c0_g1	1	0.864302	2	1.43831	2	1.66251	1	0.755702	2	1.8738	0	0	0	0	0	0	0	0
TRINITY_DN13559_c0_g1	1504	19.3526	2742	29.4464	2397	30.4479	1471	15.4676	562	6.8182	1661	11.1148	3135	34.8532	1562	21.7384	1637	16.6016
TRINITY_DN16115_c0_g1	2	4.60076	1	2.04474	0	0	0	0	0	0	0	0	0	0	0	0	0	0
TRINITY_DN26524_c0_g1	0	0	2	3.79242	1	2.18946	0	0	0	0	0	0	0	0	0	0	0	0
TRINITY_DN23870_c0_g1	0	0	0	0	0	0	0	0	0	0	0	0	0	0	0	0	2	2.38643
TRINITY_DN16157_c0_g1	0	0	0	0	0	0	0	0	0	0	0	0	0	0	0	0	2	3.14593
TRINITY_DN8439_c0_g2	6	0.953853	5	0.656341	9	1.38983	14	1.82368	2	0.30513	9	0.747709	17	2.28667	12	2.06545	11	1.32007
TRINITY_DN26348_c0_g1	0	0	1	1.30542	1	1.50275	1	1.38454	1	1.71853	0	0	0	0	0	0	0	0
TRINITY_DN8439_c0_g1	1	0.439115	0	0	0	0	4	1.45282	1	0.438183	10	2.32522	1	0.358794	1	0.478486	15	4.60728
TRINITY_DN17121_c0_g1	3	5.73591	0	0	0	0	0	0	0	0	0	0	0	0	0	0	0	0
TRINITY_DN8276_c0_g1	30	6.32524	37	6.54545	53	10.7669	12	2.02141	2	0.396491	9	0.967573	1	0.201375	3	0.667382	7	1.07102
TRINITY_DN6460_c0_g1	244	30.1316	273	27.9092	460	55.3952	348	35.1899	450	53.0997	628	40.4796	752	78.9706	311	41.5707	401	37.7683
TRINITY_DN24078_c0_g1	0	0	0	0	0	0	0	0	0	0	0	0	0	0	3	10.1771	0	0
TRINITY_DN27810_c0_g1	0	0	1	2.14334	1	2.48183	0	0	0	0	0	0	0	0	0	0	0	0
TRINITY_DN20822_c0_g1	0	0	0	0	0	0	0	0	0	0	0	0	0	0	0	0	2	3.71347
TRINITY_DN9915_c0_g1	194	7.19146	196	6.05303	244	8.90501	135	4.09131	142	4.97748	287	5.53718	314	10.0217	130	5.21301	121	3.50955
TRINITY_DN23492_c0_g1	0	0	1	0.556205	4	2.57757	0	0	0	0	1	0.369553	0	0	0	0	0	0
TRINITY_DN2624_c0_g1	1	0.69909	3	1.72072	0	0	2	1.19444	0	0	1	0.381526	1	0.567398	0	0	1	0.464596
TRINITY_DN2624_c0_g2	1	0.955069	0	0	0	0	0	0	2	2.09852	0	0	0	0	0	0	2	1.22896
TRINITY_DN12426_c0_g2	2665	69.3141	3522	76.3925	4617	118.372	3316	70.492	3195	78.4391	2885	39.0296	5626	126.167	2117	59.5581	2076	42.3819
TRINITY_DN26484_c0_g1	0	0	0	0	0	0	0	0	0	0	0	0	0	0	0	0	6	4.77219
TRINITY_DN23309_c0_g1	4	1.06836	2	0.437654	0	0	0	0	0	0	3	0.420278	2	0.445179	1	0.28941	2	0.391037
TRINITY_DN1227_c0_g1	1565	88.7339	1986	93.6947	2524	140.58	2317	107.456	1673	89.8837	2786	82.2634	4108	199.999	2509	153.904	2493	109.95
TRINITY_DN15043_c0_g1	1	1.73954	1	1.53763	0	0	0	0	0	0	1	1.01364	0	0	0	0	2	2.14214
TRINITY_DN20499_c0_g1	0	0	0	0	0	0	0	0	0	0	0	0	0	0	0	0	2	3.4816
TRINITY_DN21033_c0_g1	0	0	0	0	0	0	0	0	0	0	0	0	0	0	0	0	3	5.88807
TRINITY_DN26980_c0_g1	0	0	0	0	1	3.26805	0	0	0	0	0	0	0	0	1	3.67927	0	0
TRINITY_DN25135_c0_g1	0	0	0	0	0	0	0	0	0	0	0	0	0	0	0	0	3	5.57021
TRINITY_DN3874_c0_g2	0	0	1	0.756053	1	0.873573	0	0	1	0.98727	0	0	4	2.94973	0	0	0	0
TRINITY_DN3874_c0_g1	1	0.324816	2	0.530222	2	0.620047	0	0	1	0.318292	0	0	7	1.88051	4	1.40902	2	0.468071
TRINITY_DN20866_c0_g1	0	0	0	0	0	0	0	0	0	0	0	0	0	0	0	0	2	3.59403
TRINITY_DN24756_c0_g1	0	0	0	0	0	0	1	0.62065	1	0.76575	1	0.396315	3	1.76315	0	0	0	0
TRINITY_DN26768_c0_g1	0	0	0	0	0	0	0	0	0	0	0	0	0	0	0	0	2	3.17684
TRINITY_DN8330_c0_g1	462	32.374	503	29.3083	396	28.2244	184	10.8696	156	10.7409	328	12.443	119	6.65368	59	4.14771	89	4.67171
TRINITY_DN17499_c0_g1	0	0	0	0	0	0	0	0	0	0	0	0	0	0	0	0	2	3.96996
TRINITY_DN15508_c0_g1	5	1.60739	1	0.262436	2	0.613866	24	6.34345	8	2.51898	10	1.68986	8	2.12794	2	0.697216	6	1.39102
TRINITY_DN4678_c0_g1	0	0	0	0	0	0	0	0	0	0	3	5.44088	0	0	1	3.78228	0	0
TRINITY_DN27267_c0_g1	0	0	0	0	0	0	0	0	0	0	0	0	0	0	0	0	3	5.39105
TRINITY_DN371_c0_g1	0	0	0	0	0	0	0	0	9	11.9496	0	0	0	0	0	0	0	0
TRINITY_DN5217_c0_g1	1	1.05555	0	0	0	0	0	0	0	0	0	0	0	0	1	1.23836	2	1.34559
TRINITY_DN12382_c0_g1	51	2.13608	86	3.01088	331	13.6418	94	3.21904	118	4.68757	139	3.04438	386	14.0002	144	6.52461	85	2.79956
TRINITY_DN13351_c0_g2	1	1.44854	1	1.26297	0	0	0	0	3	4.98927	2	1.68166	1	1.1945	0	0	0	0
TRINITY_DN13351_c0_g1	4852.99	103.158	9743	171.473	10332	224.794	9979	183.333	4942	103.714	3849	44.884	7785.01	146.854	4184	99.4915	3139	52.6896
TRINITY_DN14179_c0_g1	49899	1218.8	44671	909.888	44645	1075.13	70657	1410.66	69669	1606.74	90494	1149.99	92794	1955.13	66538	1758.04	155079	2975.2
TRINITY_DN24419_c0_g1	0	0	0	0	0	0	0	0	0	0	0	0	0	0	0	0	3	4.58331
TRINITY_DN12502_c0_g1	48	3.9953	43	2.81755	45	3.71392	58	3.42283	33.0001	1.95908	84	3.03946	54	2.93609	36	2.3166	63	3.91228
TRINITY_DN20949_c0_g1	0	0	0	0	0	0	0	0	1	2.76483	0	0	0	0	0	0	1	1.46966
TRINITY_DN14405_c0_g1	0	0	1	0.130445	2	0.306926	1	0.129434	1	0.151578	1	0.0825489	8	1.06941	6	1.02616	3	0.357838
TRINITY_DN14894_c0_g1	5	7.82663	0	0	0	0	0	0	0	0	0	0	0	0	0	0	0	0
TRINITY_DN25938_c0_g1	1	0.19789	0	0	0	0	0	0	0	0	0	0	0	0	0	0	32	4.72718
TRINITY_DN15446_c0_g1	0	0	0	0	0	0	0	0	0	0	0	0	0	0	0	0	2	3.17684
TRINITY_DN3271_c0_g1	0	0	1	2.36865	0	0	0	0	1	3.04049	0	0	1	2.20406	0	0	0	0
TRINITY_DN6523_c0_g1	0	0	0	0	0	0	0	0	0	0	0	0	0	0	0	0	8	8.2394
TRINITY_DN13295_c0_g1	1222	34.0247	1052	19.2695	1407	29.6434	499	8.69938	1254	29.9322	1240	13.827	1308	29.0776	605	15.0664	728	16.8412
TRINITY_DN14024_c1_g9	3	0.687685	4	0.753271	6	1.32583	3	0.564222	3	0.665681	2	0.240152	6	1.15226	2	0.496621	2	0.339198
TRINITY_DN14024_c1_g8	151	4.01411	275	6.09425	422	11.0018	241	5.16137	217	5.37938	247	3.36589	601	13.8419	357	10.324	243	5.07858
TRINITY_DN14024_c1_g7	59658.1	2595.78	113077	4095.32	93993	4024.01	85845	3051.86	49018	2012.5	77835	1759.95	137789	5162.18	64657	3042.82	147076	4994.65
TRINITY_DN14024_c1_g6	82	6.07213	40	2.43734	74	5.37289	87	5.27055	10	0.698218	91.0001	3.50708	170	10.781	85.9999	6.87685	145	8.30923
TRINITY_DN14024_c1_g5	932.001	29.1186	1184	29.9836	1253	39.0638	862	21.8653	1171	35.4094	1741	28.318	2063	57.1143	1075	36.7951	620	15.3025
TRINITY_DN14024_c1_g4	3486	164.183	5187	203.385	3254.99	150.991	2196	83.7956	16307	725.687	2231	54.5601	7369	298.516	3729	189.842	5466	200.159
TRINITY_DN5552_c0_g1	1	2.11152	0	0	0	0	2	3.96372	0	0	0	0	0	0	0	0	0	0
TRINITY_DN10367_c0_g1	124	3.66375	178	4.38396	307	8.9449	140	3.38604	116	3.24132	373	5.74174	340	8.66607	180	5.76369	88	2.04805
TRINITY_DN14024_c1_g1	5061	118.159	4899	96.7718	4864	112.257	1780	33.3833	693.999	14.9344	3294	39.3393	1442	28.6834	1056	26.374	891.999	16.1638
TRINITY_DN5552_c0_g2	5	12.9239	0	0	1	2.65448	0	0	0	0	0	0	0	0	1	3.05504	0	0
TRINITY_DN7204_c0_g1	5	0.406527	1	0.0675167	3	0.238969	14	0.931355	31	2.3961	49	2.07658	18	1.25206	9	0.791821	12	0.753414
TRINITY_DN16550_c0_g1	2	0.408107	8	1.34353	7	1.3807	5	0.836709	5	0.984566	7	0.747588	9	1.54403	0	0	2	0.304114
TRINITY_DN13402_c0_g1	54	2.30992	51	2.28339	138	6.346	24	1.31649	43	2.95449	72	1.58138	101	3.72596	51	2.93459	21	0.704624
TRINITY_DN2392_c0_g1	3	0.599388	6	0.98693	7	1.35252	12	1.96605	0	0	9	0.940995	3	0.50424	0	0	0	0
TRINITY_DN15329_c0_g1	0	0	0	0	0	0	3	1.86195	2	1.5315	4	1.58526	1	0.587716	2	1.63227	5	2.3967
TRINITY_DN19489_c0_g1	1	0.105759	3	0.262999	14	1.44669	11	0.9523	9	0.907551	8	0.441361	39	3.51638	18	2.0603	6	0.486489
TRINITY_DN14274_c2_g5	0	0	0	0	0	0	1	2.28102	0	0	1	1.39052	0	0	0	0	0	0
TRINITY_DN14274_c2_g4	0	0	0	0	0	0	0	0	0	0	1	1.01364	2	2.8811	0	0	0	0
TRINITY_DN4951_c0_g1	2	0.499871	0	0	2	0.480786	2	0.410287	1	0.242555	1	0.131016	6	1.25273	1	0.270784	3	0.551529
TRINITY_DN14274_c2_g2	0	0	0	0	0	0	0	0	0	0	0	0	11	4.51285	0	0	0	0
TRINITY_DN14274_c2_g1	16.6272	20.2857	4.00521	4.13411	0	0	17	15.9684	5	10.6747	7	6.20311	21.1662	23.889	6	12.5864	4	5.45264
TRINITY_DN20392_c0_g1	3	6.5167	0	0	0	0	0	0	0	0	0	0	0	0	0	0	0	0
TRINITY_DN8445_c0_g2	0	0	0	0	0	0	1	0.701494	0	0	2	0.894337	1	0.657171	1	0.921624	2	1.0577
TRINITY_DN8445_c0_g1	0	0	0	0	0	0	1	2.41014	0	0	0	0	2	4.24248	1	3.05504	0	0
TRINITY_DN25459_c0_g1	1	2.66166	0	0	0	0	0	0	0	0	0	0	0	0	0	0	2	3.24035
TRINITY_DN25163_c0_g1	1	2.77333	4	9.74196	1	2.84231	0	0	0	0	0	0	0	0	0	0	0	0
TRINITY_DN7199_c0_g1	1	0.237992	9	1.75855	3	0.687601	1	0.195297	4	0.922498	3	0.374113	0	0	0	0	2	0.351294
TRINITY_DN7199_c0_g2	15	1.02255	14	0.793291	14	0.936385	6	0.334586	7	0.452926	11	0.390687	18	1.05176	3	0.221279	4	0.211386
TRINITY_DN14238_c0_g1	0	0	0	0	0	0	0	0	0	0	0	0	0	0	0	0	3	4.45215
TRINITY_DN19073_c0_g1	0	0	0	0	0	0	0	0	5	8.88561	0	0	0	0	0	0	0	0
TRINITY_DN2821_c0_g1	107	13.7991	90	9.6579	77	9.72623	138	14.5492	54	6.62399	181	12.2102	62	6.85142	12	1.68957	52	5.13527
TRINITY_DN20808_c0_g1	15	1.02705	60	3.4147	79	5.30696	33	1.84833	5	0.324954	38	1.3556	203	11.9132	97	7.18619	94	4.989
TRINITY_DN22058_c0_g1	0	0	1	0.828743	1	0.956714	5	4.37355	4	4.34568	4	2.22088	7	5.62904	4	4.58647	3	1.89527
TRINITY_DN17553_c0_g1	10	7.06065	6	3.47755	2	1.34239	34	20.5287	16	11.907	50	19.2826	10	5.7308	13	10.3213	23	10.781
TRINITY_DN23685_c0_g1	0	0	0	0	0	0	0	0	2	7.24197	0	0	0	0	0	0	0	0
TRINITY_DN6935_c0_g1	637	76.7596	645	64.3576	938	110.243	903	88.9309	552	63.485	843	52.9557	1415	145.015	1262	164.453	2214	203.484
TRINITY_DN25931_c0_g1	0	0	0	0	0	0	0	0	0	0	0	0	0	0	0	0	5	3.40363
TRINITY_DN3041_c1_g1	3	3.94525	0	0	0	0	0	0	0	0	0	0	0	0	0	0	1	0.822082
TRINITY_DN19897_c0_g1	0	0	0	0	0	0	0	0	0	0	0	0	0	0	0	0	2	3.4816
TRINITY_DN20498_c0_g1	0	0	0	0	0	0	0	0	0	0	0	0	0	0	0	0	3	3.6742
TRINITY_DN19813_c0_g1	1	2.36846	0	0	0	0	0	0	2	5.42776	0	0	0	0	0	0	0	0
TRINITY_DN6468_c0_g1	9	1.08727	6	0.615204	9	1.08701	3	0.304269	6	0.710141	13	0.840466	15	1.57983	8	1.07254	6	0.536874
TRINITY_DN21887_c0_g1	3	4.92801	0	0	0	0	0	0	0	0	0	0	1	1.35826	0	0	0	0
TRINITY_DN21245_c0_g1	0	0	0	0	0	0	0	0	0	0	0	0	0	0	0	0	3	4.7189
TRINITY_DN4764_c0_g1	0	0	0	0	0	0	0	0	5	6.13574	0	0	0	0	0	0	0	0
TRINITY_DN7089_c0_g1	130	23.0625	119	17.2488	213	37.8461	126	17.949	32	5.37878	37	3.37397	240	35.7018	146	27.6296	276	36.2395
TRINITY_DN16532_c0_g1	1	2.11152	0	0	0	0	0	0	0	0	0	0	2	3.49192	0	0	0	0
TRINITY_DN27934_c0_g1	0	0	0	0	0	0	0	0	0	0	0	0	0	0	0	0	2	2.67764
TRINITY_DN20300_c0_g1	0	0	0	0	1	0.647644	2	1.16265	0	0	1	0.371499	6	3.32165	6	4.5875	0	0
TRINITY_DN14496_c0_g1	0	0	0	0	0	0	1	0.893014	0	0	0	0	0	0	1	1.17057	3	1.92752
TRINITY_DN12409_c0_g1	10016	687.518	11482	691.272	2165	142.361	4720	268.707	122048	8215.9	15818	583.469	8102	463.893	4147	304.252	5314	276.138
TRINITY_DN25073_c0_g1	0	0	0	0	0	0	2	3.61884	0	0	0	0	0	0	1	2.33487	0	0
TRINITY_DN22879_c0_g1	3	6.21954	0	0	0	0	0	0	0	0	0	0	0	0	1	2.50231	0	0
TRINITY_DN14749_c0_g1	0	0	0	0	0	0	0	0	0	0	0	0	0	0	0	0	2	3.4816
TRINITY_DN271_c0_g2	0	0	0	0	0	0	0	0	0	0	0	0	0	0	0	0	3	2.23787
TRINITY_DN11133_c0_g2	2	0.55193	0	0	0	0	4	0.906511	1	0.268685	4	0.579175	3	0.689122	0	0	3	0.60455
TRINITY_DN16196_c0_g1	0	0	0	0	0	0	0	0	0	0	0	0	0	0	0	0	2	2.30611
TRINITY_DN3134_c0_g1	2	0.300309	10	1.33458	16	2.48515	4	0.529875	0	0	3	0.253467	30	4.03735	4	0.700119	2	0.243875
TRINITY_DN11133_c0_g1	15	3.52275	2	0.385716	4	1.55651	31	7.78132	7	1.96503	12	1.71079	9	2.98884	4	1.01764	15	4.08058
TRINITY_DN13487_c0_g1	2024	125.584	2760	141.904	6216	385.268	1219	61.7708	3555	209.274	2001	64.7134	15522	825.94	6760	458.031	3611	183.497
TRINITY_DN13487_c0_g2	4	0.275243	10	0.571934	17	1.14764	4	0.225156	6	0.391901	5	0.175657	55	3.24363	17	1.26571	3	0.159999
TRINITY_DN9729_c0_g1	28	1.90772	30	1.84161	34	2.27284	129	9.04625	137	10.8284	206	9.08923	98	7.32228	68	6.40514	42	2.9895
TRINITY_DN22111_c0_g1	4	4.24962	2	1.80046	0	0	1	0.951839	0	0	4	2.41282	1	0.869427	0	0	0	0
TRINITY_DN16031_c0_g1	0	0	1	2.26389	0	0	0	0	1	2.91077	1	1.45101	0	0	0	0	3	4.67311
TRINITY_DN4647_c0_g1	0	0	0	0	0	0	0	0	0	0	0	0	0	0	0	0	3	5.11518
TRINITY_DN8158_c0_g1	0	0	0	0	0	0	0	0	1	2.86328	1	1.42662	0	0	0	0	0	0
TRINITY_DN8158_c0_g2	0	0	0	0	0	0	0	0	1	1.60976	1	0.81445	0	0	0	0	2	1.74883
TRINITY_DN16515_c0_g1	75	5.60378	57	3.53831	98	7.17899	34	2.07833	10	0.709738	46	1.79108	36	2.30338	19	1.5361	12	0.693715
TRINITY_DN26916_c0_g1	0	0	0	0	0	0	0	0	0	0	0	0	0	0	0	0	2	2.24907
TRINITY_DN12503_c0_g1	302	9.67242	342	9.12052	639	20.2938	219	5.73878	369	11.1745	426.001	7.13052	996.999	27.7577	300	10.3105	231	5.79446
TRINITY_DN13497_c1_g1	220	6.92586	357	9.26787	323	10.1116	408	10.6744	442.001	13.242	798	13.288	525	14.4342	776	26.4207	334	7.97887
TRINITY_DN13497_c1_g2	2742.01	89.1373	5251	142.938	5092	166.12	3171	84.1355	3150	95.8884	3346	56.0749	3378	93.6768	1713	59.6694	1629	41.0865
TRINITY_DN13497_c1_g3	439	21.4131	585	23.7519	615	29.4955	559	22.2964	890	41.1077	1081	27.4538	2094	87.7919	958	50.5529	611	23.2373
TRINITY_DN20475_c0_g1	0	0	0	0	0	0	0	0	2	4.75711	0	0	0	0	0	0	0	0
TRINITY_DN23577_c0_g1	2	1.70906	0	0	0	0	1	0.746217	0	0	0	0	0	0	0	0	3	1.66749
TRINITY_DN8656_c0_g1	0	0	0	0	0	0	1	0.979884	0	0	2	1.24105	1	0.892935	0	0	2	1.38585
TRINITY_DN8776_c0_g1	2	2.46592	0	0	0	0	0	0	2	2.79139	3	2.12648	0	0	0	0	0	0
TRINITY_DN17811_c0_g1	2	6.50372	0	0	0	0	0	0	0	0	0	0	0	0	0	0	0	0
TRINITY_DN23477_c0_g1	0	0	0	0	0	0	0	0	0	0	0	0	0	0	0	0	4	5.16509
TRINITY_DN6938_c0_g1	1	1.17406	3	3.01221	5	5.7887	9	9.57613	0	0	7	4.70716	0	0	0	0	3	2.22395
TRINITY_DN18769_c0_g1	2	1.65257	0	0	0	0	0	0	0	0	0	0	0	0	0	0	10	5.39346
TRINITY_DN14363_c0_g1	0	0	4	2.85904	1	0.826216	0	0	1	0.930834	1	0.478194	2	1.39879	0	0	0	0
TRINITY_DN9253_c0_g1	65	2.55482	49	1.60426	88	3.40449	30	0.964052	91	3.38308	45	0.920628	56	1.89449	31	1.31809	49	1.50593
TRINITY_DN7940_c0_g2	0	0	0	0	0	0	0	0	0	0	3	3.75296	0	0	0	0	0	0
TRINITY_DN10944_c0_g1	465.001	23.1996	530.001	22.3707	537	27.5334	230	9.46367	56	2.86364	310	8.1173	73	3.67739	42	2.38134	51	2.1898
TRINITY_DN7940_c0_g1	0	0	0	0	0	0	6	0.337734	56	3.65774	65	2.33035	4	0.2359	0	0	4	0.213332
TRINITY_DN10049_c0_g1	8409.99	338.433	9770	326.764	21076	838.105	1595	52.3627	9488	361.961	4865	101.83	2413	83.8066	1558	67.7762	1248	39.1778
TRINITY_DN17263_c0_g1	0	0	0	0	1	1.12399	1	1.03191	1	1.28303	0	0	1	0.936684	2	2.70209	0	0
TRINITY_DN26878_c0_g1	3	7.17538	0	0	0	0	0	0	0	0	0	0	0	0	0	0	0	0
TRINITY_DN18802_c0_g1	0	0	0	0	0	0	0	0	0	0	0	0	0	0	0	0	4	4.73193
TRINITY_DN4285_c0_g1	544	22.6477	577	20.0058	656	26.8743	372	12.6624	983	38.7189	995	21.5628	863	30.9133	652	29.3641	1004	32.66
TRINITY_DN7520_c0_g1	1	0.117877	1	0.0976248	0	0	28	2.67217	10	1.04063	55	3.3099	52	4.83413	10	1.27587	14	1.26072
TRINITY_DN7355_c0_g1	2	2.22471	0	0	0	0	1	1.00165	0	0	0	0	0	0	0	0	8	5.64476
TRINITY_DN25975_c0_g1	0	0	1	1.66814	0	0	0	0	0	0	0	0	0	0	0	0	2	2.30611
TRINITY_DN10315_c0_g2	0	0	0	0	0	0	0	0	0	0	1	1.12051	0	0	3	7.0046	1	1.18298
TRINITY_DN10315_c0_g1	27.9999	3.95185	27	3.10068	21	2.868	83	9.63884	40	5.42887	60	4.39787	31	3.75683	23	3.59771	33	3.64341
TRINITY_DN27276_c0_g1	2	4.78359	1	2.12335	0	0	0	0	0	0	0	0	0	0	0	0	0	0
TRINITY_DN5597_c0_g1	1	2.58479	0	0	0	0	0	0	0	0	0	0	0	0	1	3.05504	0	0
TRINITY_DN5597_c0_g2	3	3.45103	0	0	2	2.26451	0	0	0	0	0	0	0	0	0	0	1	0.727582
TRINITY_DN8080_c0_g1	161	17.2619	234	20.7944	459	48.0766	106	9.30342	88	8.99771	153	8.55778	449	41.0328	148	17.1739	102	8.3807
TRINITY_DN9316_c0_g1	475	10.5453	644	11.9294	1218	26.738	414	7.52905	791	16.5919	992	11.4546	2156	41.3925	1021	24.5676	585	10.2272
TRINITY_DN7241_c0_g1	2	0.249455	2	0.206493	8	0.972915	8	0.817087	2	0.238399	4	0.260426	7	0.742334	5	0.675042	1	0.0950946
TRINITY_DN7646_c0_g1	7	2.07408	5	1.21135	6	1.7016	9	2.19097	0	0	5	0.777921	28	6.88685	11	3.53284	11	2.36668
TRINITY_DN23841_c0_g1	2	3.31213	0	0	0	0	0	0	0	0	0	0	0	0	0	0	0	0
TRINITY_DN13914_c0_g1	133	4.31557	161	5.8448	165	5.84498	182	4.6112	69	6.62635	225	4.01717	232	8.02139	107	3.85769	73	3.07496
TRINITY_DN9482_c0_g1	238	20.8218	187	13.3262	187	15.71	67	5.01548	55	4.63693	107	4.86796	62	4.51981	50	4.79035	81	5.39366
TRINITY_DN20578_c0_g1	0	0	3	5.63546	1	2.1687	0	0	0	0	0	0	0	0	0	0	0	0
TRINITY_DN18220_c0_g1	0	0	0	0	0	0	0	0	0	0	2	2.59102	2	3.72614	0	0	0	0
TRINITY_DN12007_c0_g1	836	64.1975	1034	65.9229	1473	110.664	803	50.3203	524	38.1008	1136	45.388	2176	142.86	990	82.18	839	49.7259
TRINITY_DN18599_c0_g1	0	0	0	0	0	0	0	0	0	0	0	0	0	0	0	0	2	3.79563
TRINITY_DN11439_c0_g1	16	2.07051	39	3.94643	11	1.28113	61	5.99232	29	3.4324	198	11.9017	19	2.36554	5	0.703779	7	0.684158
TRINITY_DN27365_c0_g1	2	0.79573	9	2.91215	4	1.50987	2	0.656373	0	0	2	0.420071	4	1.30533	0	0	3	0.843594
TRINITY_DN19840_c0_g1	0	0	3	8.51024	0	0	0	0	0	0	0	0	0	0	0	0	1	2.00777
TRINITY_DN12367_c0_g1	1297	43.3174	1597	44.539	1808	59.8173	1531	41.8415	187	5.9026	1016	17.6049	1345	38.7955	473	17.1019	396	10.2456
TRINITY_DN17280_c0_g1	0	0	0	0	0	0	0	0	0	0	2	3.25037	0	0	0	0	0	0
TRINITY_DN23922_c0_g1	0	0	0	0	0	0	0	0	0	0	0	0	0	0	0	0	2	3.67316
TRINITY_DN9112_c0_g1	232	25.3838	302	26.259	284	29.1716	397	34.0169	331	32.9845	507	27.7007	307	27.4673	295	33.4284	676	55.8337
TRINITY_DN14283_c0_g2	30	3.57012	26	2.5623	20	2.32213	93	9.0618	34	3.86412	66	4.09907	40	4.05055	29	3.73543	75	6.8162
TRINITY_DN14283_c0_g1	0	0	0	0	0	0	2	2.79208	0	0	0	0	0	0	0	0	0	0
TRINITY_DN3501_c0_g1	2	6.0304	0	0	1	3.08097	0	0	2	6.69539	0	0	0	0	0	0	0	0
TRINITY_DN22596_c0_g1	0	0	0	0	0	0	0	0	0	0	0	0	0	0	0	0	3	4.67311
TRINITY_DN25112_c0_g1	0	0	0	0	0	0	0	0	0	0	0	0	0	0	0	0	2	2.85641
TRINITY_DN25252_c0_g1	0	0	0	0	0	0	6	12.9333	4	10.5658	6	7.90996	0	0	0	0	1	1.40168
TRINITY_DN9542_c0_g1	65	3.36429	50	2.15369	161	8.19083	53	2.2433	23	1.12767	75	2.02137	100	4.44689	44	2.46382	49	1.9757
TRINITY_DN10128_c0_g1	49	1.94065	61	2.01234	67	2.61176	36	1.1657	3	0.112386	50	1.03074	47	1.60209	19	0.814035	12	0.371581
TRINITY_DN10128_c0_g2	4	0.640813	3	0.39681	10	1.55597	3	0.393815	0	0	3	0.251171	4	0.542101	2	0.346902	1	0.12089
TRINITY_DN1424_c0_g1	2	0.866321	0	0	0	0	0	0	0	0	0	0	0	0	0	0	15	4.55147
TRINITY_DN20067_c0_g1	1	1.68348	0	0	1	1.71025	3	4.71918	0	0	0	0	0	0	0	0	0	0
TRINITY_DN9204_c0_g1	58	6.7738	70.0001	6.01613	105	10.6092	70.9999	6.0688	38.9999	3.81074	85	4.66567	63	6.20677	20	2.29256	13	1.06458
TRINITY_DN8681_c0_g1	730	23.8566	962	26.2	1333	42.9098	739	19.7428	917	28.3225	1083	18.418	2730	76.8632	1316	46.522	914	23.402
TRINITY_DN13941_c4_g6	333	34.472	427	36.6912	466	47.2924	374	31.5668	154	15.0697	393	21.1326	548	48.3601	291	32.5307	393	31.1104
TRINITY_DN13941_c4_g5	11	7.433	0	0	1	0.641168	0	0	0	0	2	0.735242	0	0	2	1.51311	1	0.45071
TRINITY_DN13941_c4_g4	210	5.96812	309	7.18719	654	18.9789	350.001	7.90217	2005	49.0486	1300	17.2063	1390	33.4942	987.001	28.3577	874	18.3292
TRINITY_DN13941_c4_g3	1982	23.0462	2774	26.2862	1596	18.7341	1510	13.8896	2077	21.8673	2915	17.2069	2705	26.686	2405	29.1145	1699	15.0249
TRINITY_DN13941_c4_g2	7381.99	677.741	10324	788.46	18029	1606.87	7269	560.532	5661	510.253	5662	276.566	15686	1215.69	5908	585.43	9084	657.337
TRINITY_DN13941_c4_g1	1531	50.1439	1729	47.1178	3583	115.672	782	20.8839	2025	62.5882	1499	25.5366	2913	82.2988	1774	62.8762	1467	37.7432
TRINITY_DN22241_c0_g1	1	1.75409	1	1.55123	3	5.36127	3	4.92562	4	8.13254	2	2.04382	3	4.35826	0	0	0	0
TRINITY_DN25035_c0_g1	0	0	0	0	0	0	0	0	0	0	0	0	0	0	0	0	2	3.05554
TRINITY_DN7519_c0_g1	7	1.9106	0	0	4	1.0475	4	0.896523	0	0	5	0.71596	11	2.50013	8	2.36614	10	1.99477
TRINITY_DN22731_c0_g1	2	1.39818	3	1.72072	0	0	1	0.597218	0	0	1	0.381526	0	0	0	0	0	0
TRINITY_DN6709_c0_g1	0	0	0	0	0	0	0	0	0	0	0	0	0	0	5	12.8307	0	0
TRINITY_DN21462_c0_g1	0	0	0	0	0	0	0	0	1	2.59583	0	0	0	0	0	0	1	1.37614
TRINITY_DN801_c0_g1	2	5.71808	0	0	0	0	0	0	0	0	0	0	0	0	0	0	0	0
TRINITY_DN801_c0_g2	2	2.09749	0	0	0	0	0	0	0	0	0	0	0	0	0	0	2	1.33773
TRINITY_DN19289_c0_g1	0	0	0	0	0	0	1	0.874711	0	0	1	0.555221	0	0	1	1.14662	1	0.631755
TRINITY_DN6697_c0_g1	375	37.2541	487	40.1227	573	55.6588	175	14.2296	219	20.7281	184	9.53355	848	71.887	172	18.4923	121	9.23318
TRINITY_DN13844_c0_g1	2033	42.661	2674	42.279	5077	105.747	2186	36.5389	1980	36.8591	2879	27.3866	7187.01	133.504	2800	57.3899	2438	37.6993
TRINITY_DN13437_c0_g1	247	6.86422	358	8.34217	375	10.6189	430	9.92808	107	2.77014	195	2.81817	248	5.79685	90.0001	2.63442	98	2.14863
TRINITY_DN27051_c0_g1	2	5.48997	0	0	0	0	0	0	0	0	0	0	0	0	0	0	0	0
TRINITY_DN10343_c0_g1	1085	29.4129	1469	33.3593	1473	39.4372	1172	25.8227	956	24.5684	1803.99	25.5262	1718	40.3473	1137	33.4997	1161	24.7808
TRINITY_DN24434_c0_g1	1	2.80184	0	0	0	0	1	2.59424	1	3.14761	0	0	0	0	0	0	0	0
TRINITY_DN14276_c0_g10	84	6.12908	109	6.60845	62	4.43618	323	19.2805	510	35.3405	812	30.8733	628	39.249	307	24.2378	452.657	25.5676
TRINITY_DN14422_c0_g1	4	0.667429	6	0.826188	9	1.4575	0	0	2	0.32057	4	0.348886	2	0.282046	2	0.361333	1	0.125671
TRINITY_DN14542_c0_g1	6	0.612189	1	0.0845994	0	0	5	0.417578	1	0.093367	6	0.315221	17	1.47954	30	3.31271	73	5.71659
TRINITY_DN19976_c0_g1	0	0	0	0	0	0	0	0	0	0	0	0	0	0	0	0	2	4.11054
TRINITY_DN22661_c0_g1	0	0	0	0	0	0	3	6.65109	0	0	0	0	1	1.95108	0	0	1	1.44177
TRINITY_DN26703_c0_g1	0	0	0	0	0	0	0	0	0	0	0	0	0	0	0	0	2	3.96996
TRINITY_DN4662_c0_g1	25	5.69187	24	4.43135	17	3.73295	23	4.45786	5	1.08683	47	5.63448	23	4.33209	8	1.94698	10	1.66446
TRINITY_DN26500_c0_g1	0	0	0	0	0	0	0	0	0	0	0	0	0	0	0	0	3	3.21321
TRINITY_DN14664_c0_g1	2	0.670521	6	1.64081	7	2.23778	3	0.827302	0	0	2	0.352696	0	0	0	0	0	0
TRINITY_DN9562_c0_g1	66	2.59213	56	1.81188	75	2.89086	123	3.92867	238	8.74858	282	5.71611	548	18.5412	280	11.8636	397	12.1765
TRINITY_DN3126_c0_g1	2	2.61083	0	0	0	0	0	0	0	0	2	1.50677	1	1.07338	2	3.12061	0	0
TRINITY_DN27166_c0_g1	2	3.53766	0	0	0	0	0	0	0	0	0	0	0	0	0	0	0	0
TRINITY_DN8091_c0_g1	1	2.41529	0	0	0	0	0	0	0	0	0	0	0	0	0	0	8	9.68653
TRINITY_DN13885_c0_g1	486	20.3173	589	20.1275	691	28.1829	333	11.3584	247	9.84487	484	10.4622	788	28.4524	452	20.519	276	9.01824
TRINITY_DN14325_c0_g1	0	0	0	0	0	0	0	0	1	2.73919	1	1.36566	1	1.96941	0	0	0	0
TRINITY_DN25149_c0_g1	2	1.83179	0	0	0	0	1	0.806442	0	0	0	0	0	0	0	0	3	1.77502
TRINITY_DN1859_c0_g1	18	2.62059	16	1.9253	7	0.991406	2	0.238528	2	0.278979	2	0.152097	2	0.246835	0	0	0	0
TRINITY_DN13921_c0_g1	9560	306.668	14160	398.411	9355.01	291.252	21270	468.983	8283	173.08	16172	216.843	16678	337.011	7450	180.229	8960	169.908
TRINITY_DN1948_c0_g1	111	7.77992	136	7.92209	224	15.4007	35	2.00677	27	1.7966	62	2.26419	266	15.9759	98	7.43206	46	2.49796
TRINITY_DN13921_c0_g2	72	5.10682	92	5.42285	303	21.0795	30	1.7407	50	3.36719	103	3.8066	570	34.6396	145	11.1281	52	2.85686
TRINITY_DN11390_c0_g1	353	24.4585	263	15.1912	228	15.554	277	15.7007	163	10.8412	323	11.6833	429	25.6793	206	15.4269	330	17.7039
TRINITY_DN12754_c0_g1	931	14.6058	1418.01	18.5074	1155	17.8867	683	8.7435	669	9.85655	1532	12.4917	2029	27.4943	1343	22.7268	629	7.77308
TRINITY_DN12754_c0_g2	163	12.3342	177	11.2047	241	17.9736	163	10.1409	75	5.38051	227	9.04459	215	14.1041	85	6.93424	114	6.63027
TRINITY_DN10213_c0_g1	187	10.0013	195	8.67832	133	6.99562	519	22.6932	781	39.6097	1311	36.5479	237	10.9036	168	9.7353	229	9.55003
TRINITY_DN8557_c0_g1	528	40.2459	855	54.0395	925	69.0011	421	26.0647	474	33.8575	589	23.2743	1066	69.5083	662	54.558	995	58.5171
TRINITY_DN13393_c0_g1	61	9.59689	101	14.9299	77	13.8403	10	1.41774	10	1.96327	22	3.06759	42.0001	7.95141	13	1.91854	14	2.8826
TRINITY_DN13393_c0_g2	19	1.92953	25	2.06132	11	1.08327	35	2.88956	23	2.21249	176	9.34337	6	0.533834	4	0.451699	1	0.0800274
TRINITY_DN22948_c0_g1	0	0	0	0	0	0	0	0	0	0	0	0	0	0	2	5.75345	0	0
TRINITY_DN1308_c0_g1	0	0	0	0	0	0	0	0	0	0	0	0	0	0	3	4.75483	0	0
TRINITY_DN11514_c0_g2	9	0.624127	5	0.288186	10	0.67328	23	1.43866	15	0.966671	14	0.497862	11	0.739735	4	0.290268	11	0.661154
TRINITY_DN11514_c0_g1	3	0.405466	1	0.127097	1	0.131631	36	4.50406	30	4.32411	101	8.04276	170	22.0913	87	14.395	193	22.2042
TRINITY_DN14307_c2_g3	2440	76.0189	3919	102.822	3756	114.282	2339	58.0025	2422	68.3554	2771	43.4042	6430	170.788	3073.01	101.173	2971	69.2972
TRINITY_DN25188_c0_g1	0	0	1	2.6538	0	0	0	0	1	3.37763	0	0	0	0	0	0	1	1.85674
TRINITY_DN12864_c0_g1	997.001	69.6937	1326	68.1101	1792	101.93	1049	57.5834	662	26.0792	1146	36.4658	1732	73.9956	669.999	39.5128	568	24.3827
TRINITY_DN13277_c0_g2	0	0	4	3.02421	0	0	2	1.59175	0	0	0	0	1	0.737433	1	1.04427	0	0
TRINITY_DN13277_c0_g1	97	2.89463	117	2.92805	91	2.68564	173	4.20976	40	1.12518	74	1.14313	60.9999	2.77767	39	1.2666	60	1.41249
TRINITY_DN13288_c0_g1	1262	68.4487	1424	63.8906	1729	89.2803	2479	109.573	918	47.1035	1590	42.959	2648	108.667	1199	66.0006	1081	43.1203
TRINITY_DN8353_c0_g1	4565	360.533	5147	337.608	5375	415.975	2686	173.542	711	53.3117	2741	112.814	2887	195.04	2150	183.688	3692	225.336
TRINITY_DN22238_c0_g1	0	0	0	0	0	0	0	0	0	0	0	0	0	0	0	0	4	7.85076
TRINITY_DN26017_c0_g1	3	0.235309	6	0.390888	7	0.53809	7	0.449222	4	0.298161	19	0.776716	13	0.872716	3	0.254622	0	0
TRINITY_DN4476_c0_g1	7	20.2183	0	0	0	0	0	0	0	0	0	0	0	0	0	0	0	0
TRINITY_DN11643_c0_g1	1286	56.7664	1590	58.4141	1735.01	75.5528	227	8.18328	8	0.337818	95	2.19692	20	0.761368	18	0.849838	19	0.661782
TRINITY_DN22597_c0_g1	0	0	0	0	0	0	0	0	0	0	0	0	0	0	0	0	3	5.88807
TRINITY_DN14479_c0_g1	0	0	0	0	0	0	1	0.868691	0	0	1	0.551497	0	0	1	1.13882	1	0.628232
TRINITY_DN19895_c0_g1	0	0	0	0	0	0	0	0	0	0	0	0	0	0	0	0	3	3.83949
TRINITY_DN23045_c0_g1	1	3.11439	1	2.70455	2	6.34675	0	0	0	0	1	1.7168	0	0	0	0	0	0
TRINITY_DN1378_c0_g1	0	0	0	0	0	0	0	0	0	0	0	0	0	0	0	0	3	5.39544
TRINITY_DN20186_c0_g1	0	0	0	0	0	0	2	4.82027	0	0	0	0	0	0	0	0	0	0
TRINITY_DN21222_c0_g1	0	0	0	0	1	2.14807	0	0	1	2.41997	0	0	0	0	0	0	2	2.55966
TRINITY_DN26794_c0_g1	0	0	0	0	0	0	0	0	0	0	0	0	0	0	0	0	2	3.83805
TRINITY_DN13370_c0_g1	3247	129.024	3905	129.273	5108	199.759	1665	53.8709	2157	80.7494	2254	46.5524	2689	91.8128	950	40.7931	1329	41.2376
TRINITY_DN13370_c0_g2	117	1.70366	139	1.69987	190	2.74185	124	1.48505	205	2.81959	271	2.06548	780	9.83866	313	4.96124	91	1.04379
TRINITY_DN9320_c0_g1	101	4.29238	152	5.37567	89	3.72164	630	21.8864	5678	228.216	838	18.5357	416	15.2001	104	4.78142	156	5.17432
TRINITY_DN27074_c0_g1	0	0	0	0	0	0	0	0	0	0	0	0	0	0	0	0	3	5.01115
TRINITY_DN10193_c0_g1	100	16.7768	192	26.3723	322	51.3663	116	15.8265	65	10.4401	121	10.5643	515	73.1953	183	33.033	162	20.3205
TRINITY_DN9626_c0_g1	54	5.79863	90	8.11621	183	19.2757	87	7.6157	88.0001	9.08285	86	4.79773	818	75.4828	266	31.1663	290	24.0608
TRINITY_DN3659_c0_g1	14	2.29603	9	1.21832	17	2.70676	2	0.268789	2	0.314972	6	0.514321	5	0.693323	1	0.177569	2	0.247242
TRINITY_DN17525_c0_g1	0	0	0	0	0	0	0	0	0	0	0	0	0	0	0	0	4	6.68153
TRINITY_DN25827_c0_g1	3	7.03577	0	0	0	0	0	0	0	0	0	0	0	0	0	0	0	0
TRINITY_DN8662_c0_g1	4	2.69004	4	2.20249	2	0.851184	10	4.87071	0	0	3	0.969865	1	0.545628	0	0	6	2.24991
TRINITY_DN26180_c0_g1	2	1.67115	4	2.77383	2	1.60354	6	4.3671	0	0	2	0.927503	0	0	1	0.955897	1	0.54475
TRINITY_DN19879_c0_g1	2	6.4334	0	0	0	0	0	0	0	0	0	0	0	0	0	0	0	0
TRINITY_DN19517_c0_g1	0	0	0	0	0	0	0	0	2	1.93576	2	0.993311	7	5.071	0	0	1	0.576211
TRINITY_DN2331_c0_g1	4	3.18051	0	0	1	0.760744	1	0.688906	0	0	0	0	0	0	0	0	1	0.521216
TRINITY_DN23657_c0_g1	0	0	0	0	0	0	0	0	0	0	0	0	0	0	0	0	2	2.38643
TRINITY_DN17167_c0_g1	1	0.742469	0	0	0	0	2	1.27684	1	0.788333	2	0.815075	0	0	0	0	0	0
TRINITY_DN2354_c0_g1	0	0	1	1.11829	0	0	3	3.55899	2	2.94801	2	1.49515	1	1.06547	2	3.09634	0	0
TRINITY_DN6933_c0_g1	16	0.911515	26	1.23221	60	3.35788	17	0.792074	30	1.61999	20	0.593408	188	9.19502	74	4.56107	21	0.930534
TRINITY_DN1796_c0_g1	2355	219.559	3074	237.774	3349	305.488	10126	772.355	14010	1242.42	10629	516.528	4712	375.121	4665	470.542	8971	643.265
TRINITY_DN8883_c0_g1	636	127.891	686	113.557	675	131.012	310	50.9485	108	20.8973	425	44.725	576	97.119	227	48.9095	158	23.6958
TRINITY_DN19262_c0_g1	5	3.34657	1	0.547865	4	2.53928	0	0	0	0	0	0	0	0	0	0	0	0
TRINITY_DN15830_c0_g1	0	0	0	0	0	0	0	0	0	0	0	0	0	0	0	0	2	3.14593
TRINITY_DN8633_c0_g2	0	0	0	0	7	8.22673	0	0	0	0	0	0	0	0	0	0	0	0
TRINITY_DN13225_c0_g1	2872.99	73.1734	3731	79.1783	2950	74.0795	6279	130.726	10205	245.553	7222	95.6962	3530	77.5383	2296	63.2629	2888	57.7694
TRINITY_DN24673_c0_g1	2	6.57636	0	0	0	0	0	0	0	0	0	0	0	0	0	0	0	0
TRINITY_DN10332_c0_g1	3866	185.48	4951	197.426	5487	260.949	3991	154.826	4568	204.375	4870.99	119.642	7763	322.006	3691	191.353	3418	126.069
TRINITY_DN27571_c0_g1	3	2.81389	0	0	1	0.907635	0	0	0	0	0	0	0	0	1	1.08634	0	0
TRINITY_DN14075_c1_g1	5	2.74849	5	2.97544	4	2.49567	8	3.36978	3	1.53488	9	2.42728	7	2.88265	4	2.21877	4	1.39434
TRINITY_DN26336_c0_g1	0	0	0	0	0	0	0	0	0	0	0	0	0	0	2	4.39685	2	2.23048
TRINITY_DN14021_c0_g1	150	3.77493	54	1.0101	36	1.20538	917	21.4741	3485	123.234	4006	64.3612	2728	67.9278	1027	34.294	1261	26.9572
TRINITY_DN9315_c0_g1	645	30.0658	934	35.4305	1986	87.3347	466	17.14	312	13.5497	460	11.0115	1369	52.2211	516	24.7654	226	7.88079
TRINITY_DN22442_c0_g1	1	1.84637	0	0	2	3.77329	0	0	0	0	0	0	0	0	1	2.23731	0	0
TRINITY_DN12547_c0_g1	8551	389.046	7728	317.79	7547.01	430.365	6837	268.57	446	10.8003	3284	98.3576	1067	22.3383	1268	71.7838	575	22.3127
TRINITY_DN22095_c0_g1	0	0	0	0	0	0	0	0	0	0	0	0	0	0	0	0	3	5.88807
TRINITY_DN10669_c0_g1	198	14.0444	195	7.98052	245	15.7403	265	12.9168	49	2.26366	201	5.76715	161	6.80415	56	2.97709	69	3.15798
TRINITY_DN23092_c0_g1	10	1.31168	4	0.434106	11	1.40583	4	0.429689	0	0	4	0.273932	10	1.11421	1	0.141986	1	0.099817
TRINITY_DN12869_c0_g1	14876	469.253	17139	450.771	12799	396.838	18488	478.042	17095	508.152	21107	346.507	17954	484.601	15720	535.715	18826	464.413
TRINITY_DN11515_c0_g1	995	21.8298	1432	26.2552	2094	45.4076	764	13.7525	1304	27.0837	1740	19.9129	2487	47.2325	2288.99	54.4028	1220	21.1043
TRINITY_DN23016_c0_g1	0	0	2	2.05441	0	0	0	0	0	0	1	0.687808	0	0	1	1.42329	0	0
TRINITY_DN25172_c0_g1	0	0	2	4.20694	0	0	0	0	1	2.71388	3	4.06049	2	3.90215	0	0	0	0
TRINITY_DN5460_c0_g1	0	0	0	0	1	0.4047	0	0	0	0	0	0	0	0	0	0	10	2.99798
TRINITY_DN17207_c0_g1	0	0	0	0	0	0	0	0	2	6.29523	0	0	0	0	0	0	0	0
TRINITY_DN18375_c0_g1	0	0	1	2.6538	0	0	0	0	1	3.37763	1	1.68587	0	0	0	0	0	0
TRINITY_DN27378_c0_g1	1	0.808295	0	0	1	0.773989	2	1.40299	0	0	0	0	1	0.657171	0	0	1	0.52885
TRINITY_DN199_c0_g2	1	2.71682	0	0	1	2.78754	0	0	0	0	0	0	1	2.2256	0	0	0	0
TRINITY_DN199_c0_g1	5	1.4371	7	1.64606	7	1.92746	2	0.472194	0	0	0	0	0	0	0	0	0	0
TRINITY_DN23843_c0_g1	105	5.26179	119	4.96337	139	6.84793	42	1.72112	134	6.35971	137	3.57474	101	4.34955	55	2.98179	86	3.35892
TRINITY_DN8698_c0_g1	50	2.9114	74	3.50148	146	8.34599	54	2.55711	35	1.92111	126	3.80002	124	6.18171	57	3.55697	35	1.59024
TRINITY_DN22146_c0_g1	0	0	0	0	0	0	0	0	0	0	0	0	0	0	0	0	9	11.12
TRINITY_DN13331_c0_g1	745.999	14.1829	831	13.2401	1260	23.6707	315	4.9096	126	2.2649	393	3.88775	980	16.1775	318	6.57109	142	2.12166
TRINITY_DN3969_c0_g1	0	0	0	0	0	0	0	0	0	0	0	0	0	0	1	0.798299	9	4.23752
TRINITY_DN14836_c0_g1	2	6.50372	0	0	0	0	0	0	0	0	0	0	0	0	0	0	0	0
TRINITY_DN17995_c0_g1	3	4.80951	0	0	1	1.6224	1	1.49321	0	0	1	0.934114	0	0	0	0	0	0
TRINITY_DN14696_c0_g1	0	0	0	0	0	0	0	0	0	0	0	0	0	0	0	0	2	2.70243
TRINITY_DN13445_c0_g2	1480	35.2464	1822	36.2756	2114.01	49.9628	2111	41.181	1711	38.5023	3610	44.792	4373	90.424	3291	85.134	2493	46.7481
TRINITY_DN27025_c0_g1	4	1.26316	7	1.80518	7	2.11167	11	2.85548	2	0.618122	3	0.497866	2	0.522951	1	0.342404	1	0.228087
TRINITY_DN13932_c5_g1	458	13.1268	530	12.6543	336	9.47674	136	3.17779	64	1.72254	207	3.07042	204	5.0266	68	2.11311	58	1.30699
TRINITY_DN6424_c0_g1	97	12.9415	77	8.49845	46	5.97828	113	12.3474	175	22.3368	200	13.9325	107	12.1226	30	4.33268	62	6.29066
TRINITY_DN6849_c0_g1	5	2.5905	4	1.68384	1	0.489402	3	1.29529	0	0	3	0.8293	0	0	0	0	0	0
TRINITY_DN6849_c0_g2	6	1.34564	2	0.368625	2	0.432621	0	0	2	0.433928	1	0.117461	2	0.376046	1	0.242933	0	0
TRINITY_DN20896_c0_g1	0	0	0	0	0	0	0	0	0	0	0	0	0	0	0	0	3	4.16637
TRINITY_DN1536_c0_g1	8	0.995825	6	0.618252	12	1.43866	15	1.52897	9	1.07062	8	0.519807	17	1.71101	4	0.538952	6	0.518958
TRINITY_DN6976_c0_g1	344	10.1809	471	11.6195	666	19.4219	643	15.5558	356	9.95388	763	11.7499	1352	34.488	598	19.1441	521	12.0917
TRINITY_DN22674_c0_g1	1	1.26825	6	6.5551	0	0	3	3.4759	0	0	0	0	0	0	0	0	0	0
TRINITY_DN13822_c2_g2	0	0	0	0	0	0	0	0	0	0	0	0	0	0	0	0	75.9999	11.9418
TRINITY_DN18874_c0_g1	0	0	0	0	0	0	0	0	2	5.05749	0	0	0	0	2	5.26886	0	0
TRINITY_DN13673_c3_g1	1385	76.6828	1471	69.1727	1273	72.719	2230	104.071	1389	77.5705	2937	89.3493	2515	138.717	2192	134.583	3462	154.566
TRINITY_DN10369_c0_g1	764	54.719	811	48.2688	1088	76.4258	1873	109.742	1634	111.125	3517	131.253	5588	342.877	2555	198.003	2816	156.191
TRINITY_DN19325_c0_g1	0	0	0	0	2	5.01278	0	0	0	0	0	0	0	0	0	0	0	0
TRINITY_DN21514_c0_g1	0	0	0	0	0	0	0	0	0	0	1	1.62519	0	0	0	0	1	1.77789
TRINITY_DN26628_c0_g1	1	2.17223	0	0	0	0	0	0	0	0	0	0	0	0	0	0	6	7.95973
TRINITY_DN20908_c0_g1	3	0.399823	10	1.10253	9	1.16843	5	0.545758	1	0.1275	1	0.0695877	2	0.226353	4	0.577072	7	0.709505
TRINITY_DN24305_c0_g1	0	0	0	0	0	0	0	0	0	0	0	0	0	0	0	0	2	3.83805
TRINITY_DN3284_c0_g1	3	3.08658	1	0.869285	1	1.00302	2	1.83674	1	1.14155	3	1.74756	2	1.68252	0	0	0	0
TRINITY_DN18588_c0_g1	9	0.824968	34	2.58605	0	0	3	0.225044	2	0.174499	5	0.238972	2	0.156608	1	0.0991954	1	0.0705667
TRINITY_DN3284_c0_g2	2	1.09182	2	0.887844	5	2.57849	8	3.65143	1	0.556438	5	1.46102	5	2.21745	0	0	0	0
TRINITY_DN25193_c0_g1	0	0	0	0	0	0	0	0	0	0	0	0	0	0	0	0	4	4.35319
TRINITY_DN5427_c0_g1	3	6.96743	0	0	0	0	0	0	0	0	0	0	0	0	0	0	0	0
TRINITY_DN26224_c0_g1	0	0	0	0	0	0	0	0	0	0	0	0	0	0	0	0	3	4.6279
TRINITY_DN23364_c0_g1	2	6.50372	0	0	0	0	0	0	0	0	0	0	0	0	0	0	0	0
TRINITY_DN23142_c0_g1	0	0	1	1.89621	0	0	0	0	1	2.46277	1	1.22939	1	1.76165	0	0	0	0
TRINITY_DN5936_c0_g1	68	6.73392	100	8.21273	310	29.866	49	3.95075	48	4.5112	78	4.02849	426	35.8548	143	15.2653	47	3.57536
TRINITY_DN14055_c1_g1	19555	186.338	23481	182.202	36726.1	336.72	15894	120.612	13611	119.444	16428	79.5809	39658.2	318.514	19393	195.127	18049	133.711
TRINITY_DN8862_c0_g1	14	1.87993	14	1.55508	14	1.83108	4	0.439912	1	0.128478	10	0.701155	1	0.114015	8	1.16287	5	0.510466
TRINITY_DN24067_c0_g1	0	0	0	0	0	0	0	0	0	0	0	0	0	0	0	0	4	4.18456
TRINITY_DN27690_c0_g1	0	0	0	0	0	0	0	0	0	0	0	0	0	0	0	0	2	2.58255
TRINITY_DN3668_c0_g1	1	0.0999024	2	0.165694	9	0.879079	16	1.30832	44	4.18824	13	0.677363	48	4.09161	12	1.29742	9	0.69051
TRINITY_DN26368_c0_g1	0	0	0	0	0	0	0	0	0	0	0	0	0	0	3	8.70711	0	0
TRINITY_DN6825_c0_g1	2	4.97504	0	0	1	2.55541	0	0	0	0	0	0	0	0	0	0	0	0
TRINITY_DN13819_c0_g1	5358	202.545	6339.01	217.126	3846	138.523	1419	47.8143	1421	46.8917	1849	35.5666	3206	73.161	1184	42.9018	1654	46.9398
TRINITY_DN13819_c0_g2	212	7.75915	273	8.34427	481	17.3742	142	4.22565	171	5.93191	196	3.74243	544	17.161	246	9.68347	196	5.59818
TRINITY_DN14236_c0_g3	6398	404.885	8618.94	478.284	8942.01	578.931	1067	41.6509	2175	90.7875	1102	25.4013	4182	213.151	2108	127.156	1337	44.9874
TRINITY_DN12009_c0_g1	68	2.66375	111	8.70347	84	16.3067	97.9999	6.28273	57	4.39194	139	6.3746	29	2.51471	16	2.75121	45	1.3908
TRINITY_DN14236_c0_g1	14	1.07701	18.0528	1.16542	31	2.35747	4	0.265061	12	0.866177	8	0.337706	13	0.836441	5	0.421828	4	0.250181
TRINITY_DN25294_c0_g1	2	4.22303	0	0	0	0	0	0	0	0	0	0	0	0	0	0	0	0
TRINITY_DN21868_c0_g1	0	0	0	0	0	0	2	5.91486	0	0	0	0	0	0	0	0	0	0
TRINITY_DN7342_c0_g1	5	0.377437	8	0.529814	11	0.830748	17	1.04989	2	0.151588	9	0.365007	58.9999	3.84544	18	1.47026	32	1.86855
TRINITY_DN24879_c0_g1	0	0	0	0	0	0	0	0	0	0	0	0	0	0	0	0	2	3.63323
TRINITY_DN14492_c0_g1	6	5.39934	4	3.00516	7	6.07668	1	0.790668	0	0	0	0	1	0.733051	0	0	0	0
TRINITY_DN19448_c0_g1	0	0	0	0	0	0	3	3.0497	3	3.79236	1	0.643399	1	0.923871	0	0	0	0
TRINITY_DN4420_c0_g1	11	1.71371	22	2.80835	9	1.36248	58	7.40352	53	7.89194	117	9.46912	81.0001	10.6571	23	3.73358	28	3.26365
TRINITY_DN8687_c0_g1	2	0.337332	6	0.835034	4	0.654668	1	0.138229	13	1.72446	3	0.195714	2	0.212514	2	0.365254	1	0.0952786
TRINITY_DN14322_c0_g1	0	0	0	0	0	0	0	0	0	0	0	0	0	0	0	0	4	4.77287
TRINITY_DN13534_c0_g1	297	4.66756	346	4.5716	625	9.76353	437	5.60413	280	4.14288	599	4.92835	1853	25.5309	797	13.7025	685.001	8.50977
TRINITY_DN26993_c0_g1	1	0.854531	0	0	0	0	0	0	0	0	1	0.475234	0	0	1	0.979877	6	3.33498
TRINITY_DN23063_c0_g1	0	0	0	0	1	3.01773	0	0	0	0	1	1.64027	0	0	0	0	0	0
TRINITY_DN2933_c0_g1	9	0.569342	18	0.901551	19	1.15274	18.0001	0.902353	20	1.1421	30	0.947666	3	0.164333	6	0.414617	24	1.1898
TRINITY_DN22679_c0_g1	5	4.27266	1	0.710407	0	0	1	0.746217	0	0	0	0	0	0	0	0	0	0
TRINITY_DN26532_c0_g1	1	2.21467	0	0	0	0	1	2.07783	0	0	1	1.27324	0	0	0	0	0	0
TRINITY_DN17370_c0_g1	1	2.95015	0	0	0	0	0	0	0	0	0	0	0	0	0	0	2	3.59403
TRINITY_DN15517_c0_g1	3	4.21573	0	0	0	0	0	0	1	1.60976	1	0.81445	0	0	0	0	3	2.62325
TRINITY_DN13893_c0_g1	218	5.69422	419	9.16694	169	4.34117	50	1.02939	21	0.498497	81	1.06145	52	1.1403	19	0.544894	13	0.270768
TRINITY_DN1430_c0_g1	2	2.78958	1	1.21196	0	0	0	0	0	0	0	0	1	1.1491	0	0	0	0
TRINITY_DN1430_c0_g2	0	0	3	4.30418	1	1.6508	0	0	0	0	0	0	0	0	0	0	0	0
TRINITY_DN13958_c1_g2	69	2.45027	78	2.2468	58	1.95692	202	5.75997	36	1.2016	83	1.50025	34	1.04165	28	1.075	49	1.3546
TRINITY_DN13958_c1_g3	981	33.8457	747	21.508	961.001	32.7215	819	23.2208	4060	135.223	2830	51.8363	4178.95	128.077	3003	115.47	4312	119.981
TRINITY_DN13958_c1_g1	2250	57.0223	2538	46.0682	2439	43.1225	9008	235.963	8212	249.655	15034	252.882	19737	606.888	7007	259.261	7251.01	194.676
TRINITY_DN13958_c1_g4	219	6.29187	263	6.33218	240	6.53722	176	4.06295	161	4.42314	340	4.94013	176.054	4.21707	81	2.32286	54	1.13561
TRINITY_DN2295_c0_g1	153	29.0312	196	30.8456	343	63.1711	93	14.4678	12	2.19342	67	6.75831	65	10.3903	38	8.07415	26	3.69136
TRINITY_DN1702_c0_g1	0	0	3	1.75709	5	3.391	1	0.610432	0	0	2	0.779704	1	0.57885	0	0	0	0
TRINITY_DN20259_c0_g1	0	0	1	0.375892	6	2.62586	1	0.383574	2	0.927853	2	0.49119	2	0.755047	0	0	3	0.965783
TRINITY_DN9463_c0_g1	287	9.33817	364	9.88806	496	15.9542	233	6.1994	227	6.97961	578	9.79343	419	11.7679	233	8.23895	143	3.64102
TRINITY_DN16169_c0_g1	1	1.52867	2	2.67815	0	0	0	0	1	1.76235	0	0	0	0	0	0	0	0
TRINITY_DN14013_c5_g1	0	0	0	0	0	0	1	0.597218	0	0	4	1.52611	4	2.26959	0	0	0	0
TRINITY_DN20815_c0_g1	0	0	0	0	0	0	0	0	0	0	0	0	0	0	1	2.63443	3	4.01647
TRINITY_DN10245_c0_g1	687	22.6992	769	21.1302	1180	38.4029	310	8.32445	284	8.8745	611.999	10.5078	518	14.757	185	6.64295	220	5.67823
TRINITY_DN16936_c0_g1	0	0	0	0	0	0	0	0	0	0	0	0	0	0	0	0	2	2.82965
TRINITY_DN17976_c0_g1	0	0	0	0	0	0	0	0	1	1.43943	0	0	0	0	0	0	3	2.3861
TRINITY_DN13421_c0_g1	21	2.35925	18	1.23699	33	2.85195	9	0.827776	12	1.07204	13	0.560846	20	1.91377	4	0.358242	12	0.934057
TRINITY_DN13421_c0_g2	14	1.84607	13	1.41825	22	2.82634	2	0.215985	6	0.756765	5	0.344236	8	0.896	8	1.14191	2	0.200651
TRINITY_DN13421_c0_g3	549	13.9586	446	9.46548	462	11.6055	199	4.09694	630	14.8807	562	7.4156	984	21.5073	592	16.2747	1243	24.7052
TRINITY_DN7024_c0_g1	19	4.07051	26	4.58103	24	4.96458	17	2.98735	12	2.484	18	2.01901	58	10.4321	15	3.48071	28	4.45714
TRINITY_DN20613_c0_g1	0	0	0	0	0	0	1	2.01934	0	0	0	0	1	1.77785	1	2.58808	0	0
TRINITY_DN18512_c0_g1	1	0.297003	7	1.69985	7	1.98978	0	0	3	0.869855	0	0	3	0.739565	0	0	0	0
TRINITY_DN2531_c0_g1	3	7.17538	0	0	1	2.45752	0	0	0	0	0	0	0	0	1	2.85128	0	0
TRINITY_DN26426_c0_g1	7	1.06391	0	0	4	0.591004	2	0.249042	2	0.291469	1	0.0794084	16	2.0596	9	1.48092	4	0.459854
TRINITY_DN12856_c0_g2	74.0001	2.82506	83	2.64393	135	5.08842	46	1.43999	19	0.67917	91	1.80787	168	5.52116	65	2.69232	32	0.930611
TRINITY_DN9277_c0_g1	5	0.645633	7	0.747976	10	1.25843	4	0.422987	12	1.48164	12	0.808953	43	4.71792	12	1.67729	21	2.06477
TRINITY_DN17293_c0_g1	1	3.18227	1	2.75694	0	0	4	11.6056	0	0	0	0	0	0	0	0	0	0
TRINITY_DN9277_c0_g2	4	0.274182	2	0.113948	15	1.00875	3	0.168215	14	0.910881	7	0.249991	31	1.82125	27	2.00249	18	0.95637
TRINITY_DN20569_c0_g1	0	0	0	0	0	0	0	0	0	0	0	0	0	0	0	0	2	3.20824
TRINITY_DN11879_c0_g1	7	0.795025	10	0.923369	17	1.88489	9	0.836858	1	0.108394	9	0.523302	14	1.32901	10	1.20614	1	0.0868745
TRINITY_DN13685_c0_g1	614	33.6517	610.999	28.3661	469	28.1258	457	12.7543	950	21.0866	876	18.8516	695	14.2741	507	14.162	875	20.3282
TRINITY_DN11879_c0_g2	67	1.86121	99	2.29274	150	4.10667	36	0.817453	35	0.918354	62	0.896128	149	3.5685	57	1.71277	31	0.675684
TRINITY_DN7213_c0_g1	12	1.61311	13	1.44554	14	1.83303	8	0.880776	10	1.28619	15	1.05287	21	2.39685	7	1.01861	3	0.306598
TRINITY_DN23417_c0_g1	1	3.11439	0	0	1	3.17338	1	2.8479	0	0	0	0	2	5.06074	0	0	0	0
TRINITY_DN11664_c0_g1	993.999	35.3441	1169	34.6222	1846	65.2515	632	17.9799	423	14.2629	468	8.63013	1248	38.5777	702	26.6835	759	20.8399
TRINITY_DN26776_c0_g1	0	0	0	0	0	0	0	0	2	4.88241	0	0	0	0	0	0	0	0
TRINITY_DN23335_c0_g1	66	5.77342	86	6.2443	56	4.79604	42	3.00646	421	35.0365	143	6.5215	68	5.08449	97	9.18217	215	14.4967
TRINITY_DN17005_c0_g1	0	0	1	1.71462	0	0	0	0	0	0	0	0	0	0	0	0	2	2.36596
TRINITY_DN8356_c0_g1	0	0	0	0	0	0	3	2.79465	2	2.31586	2	1.1813	0	0	1	1.22094	1	0.664975
TRINITY_DN7306_c0_g1	2	0.463578	3	0.571159	4	0.893507	4	0.760737	8	1.79555	3	0.364284	7	1.35884	1	0.251089	10	1.71369
TRINITY_DN5289_c0_g1	13	1.04263	20	1.34336	21	1.66417	5	0.330895	68	5.21115	27	1.13827	4	0.276806	0	0	3	0.187398
TRINITY_DN22819_c0_g1	0	0	0	0	0	0	0	0	0	0	0	0	0	0	0	0	4	5.99432
TRINITY_DN14320_c6_g1	3	9.44443	0	0	0	0	0	0	0	0	2	3.46459	1	2.55545	0	0	2	3.83805
TRINITY_DN6097_c0_g1	0	0	1	1.38597	1	1.59488	1	1.46837	0	0	0	0	1	1.30393	0	0	1	0.975552
TRINITY_DN26798_c0_g1	0	0	0	0	0	0	0	0	0	0	0	0	0	0	0	0	3	5.69345
TRINITY_DN7698_c0_g1	1	0.309529	2	0.505742	5	1.24324	5	1.06214	1	0.251398	2	1.74539	1	0.2159	3	1.00673	1	0.223945
TRINITY_DN27768_c0_g1	0	0	0	0	0	0	0	0	0	0	0	0	0	0	0	0	4	7.6761
TRINITY_DN16635_c0_g1	0	0	0	0	0	0	0	0	2	7.11267	0	0	0	0	0	0	0	0
TRINITY_DN4509_c0_g1	2	0.477812	5	0.980657	18	4.14103	4	0.784198	4	0.926143	3	0.37556	10	1.99881	12	3.10573	48	8.46124
TRINITY_DN21744_c0_g1	0	0	0	0	3	7.44548	0	0	0	0	0	0	0	0	0	0	0	0
TRINITY_DN18110_c0_g1	0	0	0	0	0	0	0	0	0	0	0	0	0	0	0	0	3	5.16832
TRINITY_DN9577_c0_g1	60	13.1256	42	7.5096	47	9.31789	18	2.67344	7	1.59752	8	0.758053	16	3.30575	13	3.51314	16	2.17444
TRINITY_DN24721_c0_g1	3	8.66499	0	0	0	0	0	0	0	0	0	0	0	0	0	0	0	0
TRINITY_DN16950_c0_g1	0	0	0	0	1	3.33709	0	0	0	0	0	0	2	5.32187	0	0	0	0
TRINITY_DN12307_c0_g1	1652	97.4738	1785	89.6015	1959	112.793	1511	71.4981	733	40.7458	1448	43.8832	2539	126.757	885	57.0637	860	45.3041
TRINITY_DN12307_c0_g2	246	8.2559	295	8.27159	611	21.951	175	4.75977	243	7.65742	329.999	5.73094	1087	31.5424	260	9.47315	207	5.44527
TRINITY_DN23180_c0_g1	1	1.81464	0	0	0	0	0	0	0	0	0	0	0	0	1	2.19842	4	4.46096
TRINITY_DN19887_c0_g1	0	0	0	0	1	2.2978	1	2.09742	0	0	1	1.28436	1	1.84593	0	0	0	0
TRINITY_DN10503_c0_g1	457	25.4252	512	23.7022	577	31.4998	273	12.3875	528	27.7618	515	14.8629	1013	48.3403	401	24.0873	257	11.0418
TRINITY_DN24977_c0_g1	0	0	1	0.431264	1	0.501201	1	0.442812	0	0	2	0.567005	1	0.431299	1	0.583051	0	0
TRINITY_DN16896_c0_g1	0	0	0	0	0	0	0	0	2	1.67352	1	0.431598	0	0	3	2.6678	1	0.513769
TRINITY_DN10987_c0_g1	86	5.95005	109	6.28943	434	29.4926	209	11.7594	514	33.444	281	10.0122	637	37.7359	340	25.4756	304	16.2012
TRINITY_DN10126_c0_g1	1468	118.356	1448	96.9219	2218	179.822	545.001	36.8266	136	10.0314	975.999	40.7973	132	9.0536	62	5.33261	108	7.16059
TRINITY_DN20313_c0_g1	0	0	0	0	0	0	1	1.18633	0	0	0	0	1	1.06547	0	0	4	3.2447
TRINITY_DN6763_c0_g2	8	1.00487	10	1.03969	12	1.46954	0	0	0	0	0	0	0	0	0	0	0	0
TRINITY_DN7854_c0_g2	4	5.073	3	3.27755	5	6.29449	5	5.79316	2	2.87886	0	0	1	1.04228	0	0	0	0
TRINITY_DN6763_c0_g1	0	0	1	2.41305	1	2.81475	0	0	0	0	0	0	0	0	0	0	0	0
TRINITY_DN13865_c2_g1	723	26.5037	995	30.3573	2622	94.5027	2715	81.2999	1652	57.2005	1703	32.4582	2720	85.6753	1246	49.2829	1641	47.066
TRINITY_DN10382_c0_g1	3881	64.431	3624	50.1989	3004	49.2117	8837	119.896	3313	51.8812	9724	83.9637	3296	47.2518	5582	100.233	5098	66.6304
TRINITY_DN23090_c0_g1	392	18.0926	469	18.0218	857	38.9033	213	8.0386	207	9.04412	381	9.15509	921	36.5512	364	18.175	194	6.98693
TRINITY_DN14006_c0_g1	310	7.2032	470	9.11727	887	20.6185	277	5.26359	443	9.82941	297.001	4.32019	603.999	12.8715	345.999	8.74485	401	8.95755
TRINITY_DN14006_c0_g2	4971	184.783	5828	180.35	6190	227.26	5357	160.707	5636	194.854	6854	131.521	5867	188.024	3219	129.599	2879	83.4079
TRINITY_DN14006_c0_g3	1511	120.414	2417	159.968	1262	98.5488	1531	99.826	521	39.4631	2157	89.5927	756	51.5548	340	29.3193	496	30.5376
TRINITY_DN14006_c0_g4	16	1.04604	19	1.03272	46	2.95156	16	0.855634	13	0.806417	32	1.08988	83	4.65299	26	1.83915	17	0.862303
TRINITY_DN9430_c0_g1	429	61.2187	360	44.3341	98	14.4019	468	56.6606	60	8.43384	133	10.8274	25	3.11564	11	1.86942	41	4.86102
TRINITY_DN7079_c0_g1	211	4.51678	277	4.9457	444	9.37379	170	2.97429	459	9.26224	453	5.0444	1300	24.0116	772	17.8737	255	4.29121
TRINITY_DN17895_c0_g1	1	2.34526	1	2.08369	0	0	0	0	0	0	0	0	2	3.86619	0	0	0	0
TRINITY_DN18312_c0_g1	0	0	0	0	2	5.74094	0	0	0	0	0	0	0	0	0	0	0	0
TRINITY_DN11165_c0_g1	234	9.54687	216	7.41658	268	10.8419	100	3.34864	53	2.08413	122	2.62952	367	13.0685	128	5.72369	121	3.84431
TRINITY_DN18632_c0_g1	7	1.01202	9	1.07551	10	1.40658	26	3.0792	56	7.75602	41	3.09616	30	3.67725	11	1.72163	8	0.876726
TRINITY_DN21169_c0_g1	2	2.81049	0	0	0	0	0	0	0	0	2	1.6289	0	0	0	0	0	0
TRINITY_DN22480_c0_g1	0	0	0	0	0	0	0	0	0	0	0	0	0	0	0	0	3	3.18793
TRINITY_DN8509_c0_g1	1	2.63517	0	0	0	0	0	0	0	0	0	0	0	0	0	0	7	9.11015
TRINITY_DN13798_c6_g1	664	15.7187	986	20.8669	791.999	19.7226	615	12.0028	396	8.4253	898	11.1637	2010	38.9295	792	20.1054	613	11.4706
TRINITY_DN13798_c6_g3	10	2.35739	8	1.97614	11	2.95793	17	4.06107	3	0.823571	8	1.10262	9	1.8574	5	1.48209	16	2.97278
TRINITY_DN13798_c6_g2	761	16.3647	984	17.5341	580.999	12.1848	1663	29.477	7322	150.454	3338	37.6766	525	9.8623	381	8.93516	621	10.5985
TRINITY_DN27097_c0_g1	0	0	0	0	0	0	0	0	2	6.92695	0	0	0	0	0	0	0	0
TRINITY_DN13060_c0_g1	3666	53.0689	3513	42.3209	3520.99	50.4053	1173	13.7932	1939	26.3712	1434	10.6545	3006	37.5351	1740	27.147	781	8.77691
TRINITY_DN15431_c0_g1	2	4.83058	0	0	0	0	0	0	0	0	0	0	0	0	0	0	0	0
TRINITY_DN14156_c1_g9	32	0.930684	44	1.06675	78	2.23543	19	0.451706	16	0.439604	37	0.559925	200	5.01393	72	2.26512	31	0.707139
TRINITY_DN18901_c0_g1	0	0	1	2.08369	1	2.4099	0	0	1	2.68914	0	0	1	1.9331	0	0	0	0
TRINITY_DN20956_c0_g1	0	0	0	0	0	0	0	0	0	0	0	0	0	0	0	0	5	5.19005
TRINITY_DN9056_c0_g1	32	1.71917	26	1.16229	45	2.37579	35	1.53774	17	0.865358	67	1.87446	42	1.93808	23	1.33684	20	0.836543
TRINITY_DN8645_c0_g1	0	0	0	0	0	0	0	0	6	9.05845	0	0	0	0	0	0	0	0
TRINITY_DN27357_c0_g1	0	0	0	0	0	0	0	0	0	0	0	0	0	0	0	0	3	4.24448
TRINITY_DN8645_c0_g2	0	0	0	0	0	0	0	0	10	4.44775	0	0	0	0	0	0	0	0
TRINITY_DN8638_c0_g1	89	73.9512	360	248.154	142	113.176	8	5.78693	2	1.79178	0	0	0	0	0	0	0	0
TRINITY_DN9700_c0_g1	50	1.54249	68	1.74848	142	4.31589	32	0.806986	13	0.378946	40	0.642117	70	1.86096	42	1.40157	11	0.266015
TRINITY_DN23624_c0_g1	0	0	0	0	1	1.68035	3	4.63769	0	0	0	0	0	0	0	0	0	0
TRINITY_DN9190_c0_g1	144	28.1826	132	21.275	43	8.14214	84	13.447	709	133.359	247	25.2606	19	3.13005	8	1.69563	16	2.33903
TRINITY_DN11559_c0_g1	4897	149.021	7521	190.807	9288	278.467	4944	122.896	6916	198.743	6480	102.579	7599	199.319	4685	154.164	4285	102.206
TRINITY_DN3852_c0_g1	4	0.350151	7	0.508612	15	1.28555	9	0.644696	7	0.582968	8	0.365096	10	0.748239	0	0	0	0
TRINITY_DN26337_c0_g1	0	0	0	0	0	0	0	0	0	0	0	0	0	0	0	0	3	5.33367
TRINITY_DN13666_c0_g1	7826	151.477	13155	212.385	16472	314.565	11525	182.102	14153	257.992	9615	96.727	15402	257.35	10466	219.15	32088	488.615
TRINITY_DN5704_c0_g1	4	5.53791	0	0	0	0	0	0	0	0	0	0	0	0	0	0	0	0
TRINITY_DN7498_c0_g1	23	1.36646	31	1.50559	19	1.12255	9	0.435437	12	0.68459	25	0.77826	17	0.877677	8	0.520746	2	0.093502
TRINITY_DN15015_c0_g1	1	1.0693	2	1.81331	1	1.04605	0	0	0	0	1	0.607477	0	0	0	0	0	0
TRINITY_DN3220_c0_g1	65	4.73295	11	0.649858	2	0.139454	20	1.16312	10	0.674989	3	0.138728	7	0.42636	20	1.53841	46	2.53287
TRINITY_DN25784_c0_g1	1	1.49351	1	1.30542	1	1.50275	0	0	1	1.71853	0	0	1	1.23256	1	1.80014	0	0
TRINITY_DN13740_c0_g1	383	8.14702	610	10.913	520	11.0031	193	3.37907	1015	20.4904	472	5.26154	767	14.2618	358	8.3525	280	4.77392
TRINITY_DN13740_c0_g2	1080	27.0101	1016	20.9662	1731	43.0264	376.001	7.51887	343	8.02083	444	5.6349	1360	29.4142	462	12.8317	348	6.74668
TRINITY_DN7081_c0_g1	1	0.191793	0	0	1	0.18564	4	0.629005	4	0.739211	6	0.60204	3	0.484586	0	0	9	1.2908
TRINITY_DN23694_c0_g1	0	0	0	0	0	0	0	0	0	0	0	0	0	0	0	0	7	4.54894
TRINITY_DN25190_c0_g1	0	0	0	0	0	0	0	0	0	0	0	0	0	0	0	0	2	2.9681
TRINITY_DN26492_c0_g1	0	0	0	0	0	0	1	2.69239	0	0	0	0	0	0	0	0	1	1.77789
TRINITY_DN23855_c0_g1	833	38.5039	1136	43.7167	1227	55.7817	361	13.6444	230	10.064	794	19.1075	647	25.715	394	19.7022	429	15.4731
TRINITY_DN24523_c0_g1	2	4.97504	0	0	2	5.11083	1	2.32363	1	2.83959	0	0	0	0	1	2.95316	0	0
TRINITY_DN13135_c0_g1	180	6.37819	138	4.26408	245	8.809	44	1.30228	282	10.0568	99.0001	1.93912	169	5.24396	99	3.93985	71	1.96645
TRINITY_DN17289_c0_g1	0	0	1	0.796183	2	1.83907	0	0	3	3.12621	0	0	0	0	0	0	0	0
TRINITY_DN12534_c0_g1	146	14.2052	212	13.6831	269	20.2486	119	7.93045	18	1.2108	114	4.54892	248	15.3119	113	9.09398	101	6.3247
TRINITY_DN18584_c0_g1	0	0	2	0.720779	1	0.419813	3	1.10133	0	0	3	0.705086	9	3.26153	1	0.483614	1	0.31
TRINITY_DN9964_c0_g1	185	14.8938	154	10.313	211	16.7891	170	11.1484	73.0001	5.62064	247	10.3125	337	23.4141	131	11.5122	117	7.33349
TRINITY_DN4353_c0_g1	211	11.9386	244	11.4853	496	27.5704	267	12.3553	161	8.63427	277	8.16256	449	21.8119	226	13.8347	219	9.63909
TRINITY_DN26909_c0_g1	0	0	0	0	0	0	0	0	0	0	0	0	0	0	0	0	2	3.67316
TRINITY_DN6790_c0_g1	9	1.34329	5	0.616642	6	0.870823	2	0.244551	2	0.286132	2	0.155946	2	0.252918	3	0.484753	1	0.112985
TRINITY_DN26790_c0_g1	0	0	0	0	0	0	0	0	5	13.2073	0	0	0	0	0	0	0	0
TRINITY_DN4099_c0_g1	0	0	1	1.03512	1	1.19313	2	2.19482	1	1.36348	1	0.69299	4	3.96361	0	0	0	0
TRINITY_DN22672_c0_g1	1	1.8953	0	0	0	0	0	0	0	0	1	1.10211	1	1.57009	3	6.8861	1	1.16286
TRINITY_DN3451_c0_g1	1	1.73954	2	3.07525	0	0	0	0	0	0	0	0	0	0	0	0	2	2.14214
TRINITY_DN26240_c0_g1	3	0.872312	4	0.951359	7	1.94926	3	0.716608	0	0	2	0.305297	1	0.241549	1	0.315153	0	0
TRINITY_DN26761_c0_g1	0	0	0	0	0	0	0	0	0	0	0	0	0	0	0	0	2	3.4816
TRINITY_DN25144_c0_g1	1	2.46322	0	0	0	0	0	0	0	0	0	0	0	0	0	0	3	4.49574
TRINITY_DN11585_c0_g1	1051	125.553	1427	141.166	2834	330.293	1694	165.696	1285	146.61	1349	84.1053	4624	470.011	1488	192.402	1300	118.585
TRINITY_DN14811_c0_g1	0	0	0	0	1	0.161731	9	1.22903	1	0.160066	11	0.958144	4	0.563355	6	1.08254	3	0.376533
TRINITY_DN12584_c0_g1	105	4.36319	138	4.73243	160	6.57527	23	0.808045	21	0.827993	32	0.70143	91	3.10636	27	1.1273	6	0.189484
TRINITY_DN13936_c1_g2	2468	118.791	3261	130.702	3695	174.925	1430.99	56.1497	1119	50.9424	2591	64.8536	3798	157.102	2451	127.589	3053	114.492
TRINITY_DN15225_c0_g1	1	1.83038	0	0	0	0	0	0	0	0	0	0	0	0	0	0	1	1.12453
TRINITY_DN13936_c1_g1	965	54.5492	1110	43.4592	2454	129.003	643	27.9382	94	6.13311	591	18.1169	152	11.8584	106	7.81579	110	7.85081
TRINITY_DN25802_c0_g1	2	6.72685	0	0	0	0	0	0	0	0	0	0	0	0	0	0	0	0
TRINITY_DN25699_c0_g1	0	0	1	0.960349	0	0	0	0	0	0	1	0.643399	4	3.69548	0	0	0	0
TRINITY_DN3981_c0_g1	0	0	0	0	0	0	14	16.3488	0	0	0	0	3	3.14982	1	2.72963	2	2.77758
TRINITY_DN17520_c0_g1	2	2.5546	0	0	0	0	0	0	0	0	0	0	0	0	1	1.52447	1	0.800563
TRINITY_DN16072_c0_g1	6	0.807425	5	0.556573	5	0.65535	1	0.110216	8	1.03009	6	0.421607	3	0.34277	1	0.145673	1	0.102305
TRINITY_DN19746_c0_g1	1	3.18227	0	0	0	0	0	0	0	0	1	1.74795	0	0	0	0	0	0
TRINITY_DN24033_c0_g1	0	0	0	0	0	0	0	0	0	0	0	0	0	0	1	3.05504	2	3.14593
TRINITY_DN16942_c0_g1	1	2.83038	0	0	0	0	0	0	0	0	0	0	0	0	1	3.30599	0	0
TRINITY_DN9711_c0_g1	3174	92.8314	3700.99	90.2357	2824.01	81.4461	2997	71.7418	1495	41.182	2552	38.784	2542	63.8622	940	29.6479	1267	29.0113
TRINITY_DN24515_c0_g1	0	0	0	0	0	0	0	0	0	0	0	0	0	0	0	0	4	6.75044
TRINITY_DN22817_c0_g1	1	2.21467	0	0	0	0	0	0	0	0	0	0	1	1.82878	0	0	1	1.35122
TRINITY_DN26392_c0_g1	48	9.51386	69	11.2606	47	9.01046	78	12.6772	24	4.58718	88	9.12711	40	6.67116	13	2.79054	12	1.77536
TRINITY_DN13650_c2_g1	10512	621.27	11464	563.471	16708	969.184	11434	551.97	8055	449.567	9096	279.507	14861	753.599	8580	548.18	6963	319.211
TRINITY_DN10716_c0_g1	192	6.94251	314	9.5648	763	27.3842	105	3.15393	125	4.31559	157	3.0022	543	17.0503	268	10.5348	113	3.24881
TRINITY_DN17651_c0_g1	0	0	0	0	0	0	0	0	0	0	0	0	0	0	0	0	3	4.24448
TRINITY_DN14474_c0_g1	0	0	0	0	0	0	0	0	1	1.86761	0	0	0	0	1	1.95514	4	3.99301
TRINITY_DN23387_c0_g1	2	1.00069	1	0.406383	1	0.472655	0	0	1	0.505166	1	0.266443	2	0.814392	1	0.548004	4	1.38009
TRINITY_DN27955_c0_g1	1	3.04807	1	2.6538	1	3.11231	0	0	0	0	1	1.68587	0	0	0	0	0	0
TRINITY_DN13761_c0_g3	4466	162.176	5232.01	156.157	5108.99	191.636	11862	356.419	3688	135.203	9179.01	176.881	10220	409.113	6525	277.609	8631.01	266.782
TRINITY_DN13761_c0_g2	570	14.1042	749.001	15.5432	883	21.8319	541.001	11.0876	626.999	14.9942	819.999	10.6815	1330	29.2429	753	20.4144	595	11.7545
TRINITY_DN13761_c0_g1	1167	16.6388	2433	28.1293	2141	30.246	5801	63.9389	4592.99	59.6972	7913.01	56.0216	16215	190.126	10047	146.607	10038	107.768
TRINITY_DN22589_c0_g1	0	0	0	0	0	0	0	0	0	0	0	0	1	0.97684	2	2.82533	3	2.25194
TRINITY_DN26408_c0_g1	1	0.632672	4	2.0668	0	0	2	1.07042	1	0.656938	4	1.36937	0	0	3	2.11259	1	0.425122
TRINITY_DN22382_c0_g1	0	0	2	4.96206	0	0	0	0	0	0	1	1.58277	3	6.93828	1	3.30599	0	0
TRINITY_DN23267_c0_g1	5	0.508075	7	0.589797	2	0.198662	4	0.332697	0	0	4	0.212004	8	0.693455	7	0.769809	3	0.233998
TRINITY_DN9409_c0_g1	114	18.786	154	20.9558	277	44.5291	125	17.1261	142	24.1203	125	11.1894	270	37.756	101	18.1918	96	12.1332
TRINITY_DN13063_c1_g1	438	12.9188	538	13.1602	435	12.499	249	5.85605	275	7.56402	412	6.25865	291	7.23902	116	3.69716	205	4.7497
TRINITY_DN17758_c0_g1	2	3.36697	0	0	0	0	0	0	0	0	0	0	0	0	0	0	0	0
TRINITY_DN14065_c0_g1	47	4.70301	35	2.94865	34	3.58531	22.0001	1.84082	35	3.34756	70	3.72591	87	7.82669	21	2.39318	16.0001	1.26334
TRINITY_DN22637_c0_g1	1	1.2773	1	1.10096	0	0	2	2.33554	1	1.45077	1	0.736168	4	4.19976	0	0	0	0
TRINITY_DN18407_c0_g1	0	0	0	0	0	0	0	0	0	0	0	0	0	0	1	0.460561	11	3.26834
TRINITY_DN21474_c0_g1	0	0	0	0	0	0	0	0	0	0	0	0	0	0	0	0	2	3.67316
TRINITY_DN835_c0_g1	0	0	0	0	0	0	0	0	0	0	0	0	0	0	0	0	4	5.11932
TRINITY_DN15543_c0_g1	0	0	0	0	0	0	0	0	0	0	0	0	0	0	0	0	6.80735	10.1581
TRINITY_DN16444_c0_g1	2	5.60369	0	0	0	0	0	0	0	0	0	0	0	0	0	0	0	0
TRINITY_DN27914_c0_g1	0	0	0	0	0	0	0	0	0	0	0	0	0	0	0	0	3	3.64221
TRINITY_DN27806_c0_g1	0	0	0	0	0	0	0	0	0	0	0	0	0	0	0	0	2	3.41012
TRINITY_DN12877_c0_g1	45166	1303.55	116214	2795.94	13786	392.085	34770	820.154	92223	2514.34	28980	435.169	4311	107.252	2690	83.9503	3245	73.438
TRINITY_DN27852_c0_g1	1	3.14814	0	0	0	0	0	0	0	0	0	0	0	0	0	0	6	11.5141
TRINITY_DN17874_c0_g1	1	1.2773	1	1.10096	0	0	0	0	2	2.90154	2	1.47234	0	0	0	0	0	0
TRINITY_DN21731_c0_g1	0	0	0	0	0	0	0	0	0	0	0	0	0	0	0	0	2	3.41012
TRINITY_DN3843_c0_g1	2	0.748552	3	0.914017	4	1.42276	0	0	0	0	1	0.197278	1	0.307732	2	0.812918	0	0
TRINITY_DN1497_c0_g1	0	0	0	0	1	2.4099	0	0	0	0	0	0	0	0	0	0	2	2.85641
TRINITY_DN9874_c0_g1	409	31.8038	567	36.6063	662	50.441	171	10.8117	251	18.4919	232	9.36804	1618	107.667	326	27.3867	281	16.7949
TRINITY_DN21773_c0_g1	0	0	0	0	2	4.25537	0	0	0	0	1	1.19893	1	1.71537	0	0	0	0
TRINITY_DN26161_c0_g1	0	0	0	0	0	0	0	0	0	0	0	0	0	0	0	0	13	6.23141
TRINITY_DN12177_c0_g2	1	2.13124	0	0	0	0	0	0	1	2.46277	2	2.45878	1	1.76165	0	0	3	3.90873
TRINITY_DN12177_c0_g1	737	12.645	888	12.7084	872	14.7668	999	14.0089	1243	20.0946	1703	15.1924	1866	27.6525	1797	33.3395	1039	14.0325
TRINITY_DN23947_c0_g1	0	0	0	0	0	0	2	4.31112	1	2.64145	3	3.95498	1	1.89756	0	0	0	0
TRINITY_DN9548_c0_g1	18	1.454	37	2.45111	28.0001	2.21989	14	0.895127	16	1.17619	18	0.725749	29	1.97252	5	0.418564	16	0.956969
TRINITY_DN9548_c0_g2	0	0	0	0	2	2.40442	2	2.21181	1	1.3742	2	1.39643	0	0	0	0	1	0.765089
TRINITY_DN23970_c0_g1	3	6.16284	0	0	0	0	0	0	0	0	0	0	0	0	0	0	0	0
TRINITY_DN17969_c0_g1	0	0	1	1.04313	0	0	1	1.1059	0	0	0	0	1	0.998063	1	1.44496	0	0
TRINITY_DN12810_c0_g1	2322	86.4233	2950	91.5007	3520	129.003	2000	60.6195	565	19.8838	3142	60.6884	1111	35.4977	529	21.2563	956	27.6355
TRINITY_DN5894_c0_g1	18	6.48587	9	2.64162	9	3.08542	25	7.41647	26	9.22694	27	5.12387	17	5.04443	4	1.56449	16	4.11461
TRINITY_DN18019_c0_g1	0	0	0	0	0	0	0	0	0	0	1	0.949497	1	1.34701	2	3.94272	0	0
TRINITY_DN19109_c0_g1	3	5.05045	0	0	1	1.71025	1	1.57306	0	0	1	0.981269	1	1.39288	0	0	2	2.07602
TRINITY_DN16719_c0_g1	0	0	0	0	0	0	0	0	0	0	0	0	0	0	0	0	5	6.28772
TRINITY_DN13698_c3_g6	1368	46.0087	2009	56.3517	2610	86.456	757	20.7489	168	5.34714	879	15.3406	1172	33.8874	680	24.7708	576	15.199
TRINITY_DN13329_c0_g1	38	1.37132	41	1.21633	64	2.23255	44	1.27601	41	1.38968	154	2.82204	186	5.96845	60.9999	2.6315	49	1.33087
TRINITY_DN7541_c0_g1	0	0	3	2.26928	2	1.71421	1	0.732364	7	6.9548	1	0.466585	0	0	0	0	0	0
TRINITY_DN1930_c0_g1	3134	125.238	4017	133.705	3061	120.39	1502	49.0732	709	26.8004	677	14.0819	1975	67.9234	1365	59.0078	1924	60.1059
TRINITY_DN26193_c0_g1	0	0	0	0	1	3.04925	2	5.48845	0	0	0	0	0	0	0	0	0	0
TRINITY_DN9746_c0_g1	12	2.49907	8.00001	1.88469	12	1.59274	10	3.16342	7	2.9524	12	1.09297	11	2.24436	4	1.66627	21	3.06065
TRINITY_DN17046_c0_g1	3	2.66834	12	8.9024	4	3.42924	0	0	0	0	1	0.496655	0	0	0	0	0	0
TRINITY_DN8042_c0_g1	0	0	0	0	0	0	0	0	0	0	0	0	0	0	0	0	0	0
TRINITY_DN8042_c0_g2	0	0	0	0	1	1.17525	0	0	0	0	0	0	0	0	0	0	4	3.00259
TRINITY_DN8042_c0_g3	1	1.15034	0	0	0	0	0	0	0	0	0	0	0	0	1	1.36113	2	1.45516
TRINITY_DN19459_c0_g1	0	0	0	0	0	0	0	0	0	0	0	0	0	0	0	0	4	4.21736
TRINITY_DN3427_c0_g1	2	3.7906	1	1.68347	3	5.81505	31	55.0959	6	13.1898	20	22.0422	6	9.42051	1	2.29537	2	2.32573
TRINITY_DN27325_c0_g1	1	3.25186	0	0	0	0	0	0	0	0	0	0	0	0	0	0	1	1.98498
TRINITY_DN15255_c0_g1	0	0	0	0	0	0	0	0	0	0	0	0	0	0	0	0	4	5.82225
TRINITY_DN10964_c0_g1	6546	947.48	4033	482.505	3029	426.541	4713	558.815	3400	471.458	50149	3791.48	1781	218.555	2788	436.864	9353	1026.14
TRINITY_DN10964_c0_g2	3	2.88272	2	1.6136	0	0	0	0	3	3.16966	7	3.78382	0	0	2	2.23168	0	0
TRINITY_DN20365_c0_g1	2	5.37792	0	0	0	0	0	0	0	0	0	0	0	0	0	0	0	0
TRINITY_DN18893_c0_g1	1	0.610167	4	1.99073	1	0.577273	9	4.63087	4	2.52199	1	0.32918	0	0	1	0.677088	1	0.411636
TRINITY_DN11315_c0_g1	15	0.886601	16	0.786603	14	0.812705	47	2.27209	135	7.56537	64	1.97028	55	2.79008	12	0.767389	28	1.28643
TRINITY_DN11315_c0_g2	1	0.196021	0	0	2	0.379288	4	0.642922	1	0.188975	0	0	8	1.31993	3	0.636863	2	0.292814
TRINITY_DN22483_c0_g1	3	1.56662	1	0.424342	1	0.49328	2	0.87076	2	1.05931	3	0.836252	0	0	1	0.573285	0	0
TRINITY_DN3566_c0_g1	1	1.84637	0	0	0	0	0	0	2	5.45992	0	0	0	0	0	0	0	0
TRINITY_DN4001_c0_g1	199	14.4861	273	16.5129	288	20.559	172	10.243	119	8.22665	389	14.7556	114	7.10832	63	4.96225	73	4.11385
TRINITY_DN18614_c0_g1	3	0.637228	1	0.174713	1	0.205133	2	0.348443	4	0.820751	0	0	2	0.356749	2	0.460128	6	0.947445
TRINITY_DN11700_c0_g1	52	3.86672	56	3.45113	88	6.41589	176	10.7069	998	70.2868	227	8.79091	358	22.7838	141	11.3057	184	10.5813
TRINITY_DN16588_c0_g1	1	2.23603	0	0	0	0	0	0	0	0	0	0	0	0	0	0	5	6.81829
TRINITY_DN24735_c0_g1	2	3.72511	0	0	0	0	0	0	0	0	0	0	0	0	0	0	0	0
TRINITY_DN25735_c0_g1	0	0	0	0	0	0	0	0	0	0	0	0	0	0	0	0	2	3.59403
TRINITY_DN24210_c0_g1	3	8.06688	0	0	0	0	0	0	0	0	0	0	0	0	0	0	0	0
TRINITY_DN7467_c0_g1	47	4.18013	53	3.90543	53	4.61354	45	3.28126	52	4.37333	78	3.61412	69	5.21165	14	1.34994	18	1.23567
TRINITY_DN24607_c0_g1	0	0	0	0	0	0	0	0	0	0	0	0	0	0	0	0	2	2.15924
TRINITY_DN21782_c0_g1	7	1.5476	1	0.181736	2	0.426622	1	0.181367	4	0.85519	0	0	4	0.741739	0	0	4	0.655811
TRINITY_DN11667_c0_g1	59	3.50226	64	3.36279	164	10.6099	38.9999	2.57234	45	3.04787	74	3.13969	342	19.6282	109	9.43059	41	2.16718
TRINITY_DN13760_c0_g1	1066	30.5968	1554	37.33	1505	42.6442	814.001	18.8877	464	12.5107	1132	16.7324	1274	31.1856	649.001	20.0832	579.001	13.0114
TRINITY_DN6490_c0_g1	92	5.59728	73	3.69365	141	8.42351	105	5.22496	117	6.75034	128	4.05635	83	4.33288	85	5.59515	96	4.53764
TRINITY_DN14165_c4_g2	3225	85.3344	4049	89.4098	5761	150.396	3315	71.7213	2395	59.9042	4766	65.6326	6548	149.52	5759	164.985	5965	124.005
TRINITY_DN25270_c0_g1	0	0	0	0	0	0	0	0	0	0	0	0	0	0	0	0	2	3.71347
TRINITY_DN18014_c0_g1	1	1.68348	0	0	1	1.71025	0	0	0	0	0	0	0	0	0	0	1	1.03801
TRINITY_DN10364_c0_g1	293	7.24404	419	8.64815	603	14.705	268	5.41439	319	7.43081	362	4.66162	1024	21.8414	705	18.8754	279	5.42344
TRINITY_DN5551_c0_g1	1	2.13124	2	3.79242	1	2.18946	3	6.00094	0	0	1	1.22939	0	0	0	0	0	0
TRINITY_DN3612_c0_g1	1059	72.247	1515	86.1448	1560	104.323	1773	99.0945	1028	66.8847	1731	61.7836	464	27.26	349	25.884	534	28.3192
TRINITY_DN19964_c0_g1	2	0.604075	1	0.24687	4	1.1557	1	0.248191	1	0.29506	1	0.158635	2	0.501067	4	1.30966	2	0.437949
TRINITY_DN22723_c0_g1	0	0	0	0	0	0	0	0	0	0	0	0	0	0	0	0	6	12.0466
TRINITY_DN20452_c0_g1	0	0	0	0	0	0	0	0	0	0	0	0	0	0	0	0	2	2.05985
TRINITY_DN548_c0_g1	0	0	0	0	1	1.2786	0	0	1	1.46229	0	0	1	1.05766	0	0	1	0.805825
TRINITY_DN548_c0_g2	0	0	0	0	5	3.59675	0	0	2	1.60472	1	0.414503	2	1.22524	1	0.853879	2	0.99433
TRINITY_DN23622_c0_g1	0	0	0	0	0	0	0	0	0	0	2	2.37811	0	0	0	0	0	0
TRINITY_DN9630_c0_g1	430	32.1335	440	27.2774	580	42.4888	239	14.627	159	11.2638	243	9.43303	1370	87.5343	442	35.7349	192	11.1125
TRINITY_DN14204_c2_g2	0	0	0	0	1	1.10767	7	7.11596	13	16.4336	9	5.79059	4	3.69548	3	3.99354	5	3.57124
TRINITY_DN14204_c2_g3	197	16.9506	242	17.3893	262	22.2138	67	4.62357	7	0.578854	82	3.71603	6	0.445847	5	0.470331	16	1.0052
TRINITY_DN14204_c2_g1	410	11.4362	440	10.1211	530	14.5848	342	13.4624	143	3.51464	398	7.18601	655	23.332	487	17.6042	787	20.0441
TRINITY_DN17359_c0_g1	0	0	0	0	0	0	1	1.67066	0	0	0	0	2	2.95566	1	2.16078	1	1.09713
TRINITY_DN7941_c0_g2	3	0.31276	4	0.34571	7	0.939119	0	0	3	0.501706	16	1.08004	9	0.809038	4	1.31292	6	0.479775
TRINITY_DN15720_c0_g1	0	0	0	0	0	0	0	0	0	0	0	0	0	0	2	5.50758	0	0
TRINITY_DN7769_c0_g1	711	18.4577	1025	22.1864	1255	32.1157	761	16.1479	695	17.038	1542	20.8268	1145	25.6334	493	13.8437	487	9.9251
TRINITY_DN3994_c0_g1	17	5.21029	25	6.2609	12	3.58758	3	0.784773	4	1.2461	9	1.44902	16	4.16945	5	1.72518	10	2.2193
TRINITY_DN865_c0_g1	0	0	0	0	0	0	1	2.64243	2	6.40107	1	1.5965	1	2.33506	0	0	0	0
TRINITY_DN24178_c0_g1	0	0	0	0	0	0	1	1.64187	0	0	0	0	0	0	0	0	2	2.15924
TRINITY_DN26422_c0_g1	0	0	0	0	0	0	0	0	0	0	0	0	0	0	0	0	2	2.1766
TRINITY_DN24589_c0_g1	0	0	0	0	0	0	0	0	0	0	0	0	0	0	0	0	2	3.63323
TRINITY_DN13862_c0_g2	2587	92.8549	3823	114.396	3874.99	137.013	4446	130.511	3418	116.047	6015	112.395	5611	173.53	5635	218.832	4300	120.807
TRINITY_DN13862_c0_g1	12700	191.392	13324	168.402	9603	144.485	14243	184.906	32236	488.795	38866	323.973	17633	244.316	9777	169.855	11282	142.581
TRINITY_DN14560_c0_g1	0	0	1	0.756053	0	0	2	1.59175	0	0	1	0.506293	0	0	0	0	1	0.585399
TRINITY_DN13944_c0_g4	0	0	0	0	0	0	0	0	6	14.7766	1	1.22939	0	0	1	2.56615	1	1.30291
TRINITY_DN15911_c0_g1	0	0	0	0	0	0	0	0	0	0	0	0	0	0	1	3.08153	3	4.76526
TRINITY_DN13944_c0_g2	5	3.04874	14	9.03404	10	5.74469	2	3.27676	13	16.2529	0	0	2	2.92206	0	0	1	1.81661
TRINITY_DN13944_c0_g3	22	11.0924	51	20.8864	58.2043	27.7213	5	2.09756	23	11.7174	3	0.805814	1	0.410259	1	0.552445	0	0
TRINITY_DN13944_c0_g1	450	107.172	1076	189.214	697.796	146.536	184	42.1287	616	203.883	169	32.113	56	19.0237	40	11.4571	112	37.118
TRINITY_DN16849_c0_g1	1	1.12725	0	0	0	0	0	0	0	0	0	0	0	0	0	0	4	2.857
TRINITY_DN18239_c0_g1	0	0	0	0	0	0	0	0	0	0	0	0	0	0	0	0	3	4.7189
TRINITY_DN26413_c0_g1	0	0	3	0.360161	1	0.141304	4	0.47594	2	0.278316	1	0.0758703	5	0.615676	2	0.314487	1	0.110081
TRINITY_DN106_c0_g1	0	0	0	0	0	0	0	0	0	0	0	0	0	0	1	2.68196	3	4.09097
TRINITY_DN12735_c0_g1	94	1.99428	148	2.61383	147	7.17004	59	1.01978	85	3.63442	134	3.13056	241	14.1613	152	3.48832	40	0.664744
TRINITY_DN27980_c0_g1	0	0	1	1.59382	0	0	1	1.68552	0	0	1	1.04784	0	0	0	0	0	0
TRINITY_DN19866_c0_g1	0	0	0	0	1	1.56779	0	0	0	0	0	0	2	2.56658	0	0	0	0
TRINITY_DN10584_c1_g1	1	2.74498	0	0	0	0	0	0	1	3.09459	1	1.5426	1	2.2473	0	0	2	3.34076
TRINITY_DN12532_c0_g1	262	15.9408	286	14.476	493	29.3834	265	12.8933	582	33.5484	589	18.6278	2366	123.612	771	50.6234	409	19.1573
TRINITY_DN26762_c0_g1	1	2.46322	0	0	0	0	0	0	0	0	0	0	0	0	1	2.92783	2	2.99716
TRINITY_DN19395_c0_g1	0	0	0	0	0	0	0	0	1	1.79193	0	0	0	0	0	0	3	2.88284
TRINITY_DN11261_c0_g1	493	22.4356	747	28.2631	1054	47.2564	495	18.333	601	25.7795	754	17.8266	1843	72.1622	721	35.4263	464	16.3914
TRINITY_DN27429_c0_g1	0	0	0	0	0	0	0	0	0	0	0	0	0	0	0	0	2	2.9681
TRINITY_DN8621_c0_g1	11	3.37966	9	2.25936	8	2.35001	2	0.505005	4	1.2014	9	1.45263	3	0.764035	3	0.999256	2	0.444862
TRINITY_DN13679_c0_g1	1585	62.9741	1387	45.719	1070	41.7025	969	29.9882	1155	42.1713	1855	36.5827	2849	94.5389	1478	60.47	2188	64.3603
TRINITY_DN15932_c0_g1	0	0	0	0	0	0	0	0	0	0	0	0	0	0	0	0	5	4.91507
TRINITY_DN16895_c0_g1	1	2.1515	0	0	0	0	0	0	0	0	0	0	0	0	0	0	2	2.62936
TRINITY_DN25321_c0_g1	0	0	0	0	2	6.67417	0	0	0	0	0	0	0	0	0	0	0	0
TRINITY_DN2148_c0_g1	0	0	1	1.42241	0	0	1	1.50598	1	1.86761	2	1.88347	0	0	0	0	0	0
TRINITY_DN12774_c0_g2	0	0	0	0	2	1.01877	2	0.90102	1	0.548902	3	0.865244	1	0.438179	1	0.593134	0	0
TRINITY_DN12774_c0_g1	13	0.494719	32	1.0369	50	1.89638	73	2.32199	3	0.114137	61	1.24359	154	5.17617	80	3.35144	64	1.9211
TRINITY_DN23228_c0_g1	4	0.571656	12	1.41773	6	0.834411	8	0.93654	8	1.09506	3	0.223935	21	2.54512	4	0.618854	9	0.975463
TRINITY_DN9107_c0_g1	15	2.8131	19	2.92732	21	3.86925	4	0.624179	7	1.2835	6	0.571854	20.9999	3.33092	8	1.64891	2	0.284772
TRINITY_DN12672_c0_g1	1492	46.0547	1711	44.0982	2862	87.4729	1151	29.2852	1526	44.5963	1639	26.1808	3362	90.4354	1612	54.1446	980	23.8693
TRINITY_DN22317_c0_g1	0	0	0	0	0	0	0	0	0	0	0	0	0	0	0	0	3	4.01647
TRINITY_DN13768_c1_g2	17571	298.346	16484	234.204	10733	179.898	28215	390.862	29617	478.935	21738	193.31	12372	180.363	7014	128.377	14233	189.913
TRINITY_DN13176_c0_g1	224	7.02949	202	5.20569	347	10.8357	249	6.26333	97	3.62357	237	4.24183	110	3.13834	82	2.53452	75	1.9083
TRINITY_DN5150_c0_g1	2	1.34502	1	0.550623	0	0	5	2.86077	1	0.704038	3	1.09712	3	1.63688	0	0	4	1.79516
TRINITY_DN3999_c0_g1	0	0	2	0.647144	1	0.377468	0	0	0	0	0	0	5	1.63166	2	0.865053	0	0
TRINITY_DN3999_c0_g2	0	0	3	0.777505	1	0.303154	0	0	0	0	0	0	6	1.5765	1	0.344154	3	0.687435
TRINITY_DN13529_c9_g2	10.1307	13.9098	0	0	0	0	0	0	0	0	3	2.25335	0	0	8.39538	15.5918	31.6843	32.8595
TRINITY_DN13529_c9_g3	0	0	0	0	0	0	0	0	0	0	0	0	0	0	2	1.94762	6.14443	6.75121
TRINITY_DN13529_c9_g1	0	0	0	0	0	0	0	0	0	0	0	0	0	0	0	0	3.00916	2.2447
TRINITY_DN13529_c9_g4	2	1.05701	0	0	0	0	0	0	0	0	0	0	0	0	2	0.656427	14	3.6814
TRINITY_DN13529_c9_g5	2	3.66076	0	0	0	0	0	0	0	0	0	0	0	0	0	0	0	0
TRINITY_DN14288_c2_g1	1	2.32248	3	6.19215	0	0	0	0	1	2.66501	0	0	0	0	0	0	0	0
TRINITY_DN23215_c0_g1	0	0	3	0.484273	7	1.32751	1	0.16073	2	0.37795	4	0.410266	3	0.494974	2	0.424575	0	0
TRINITY_DN11365_c0_g1	129	3.71746	166	4.26724	195	5.69429	188	4.96029	70	2.1565	251	4.1898	141	4.09721	81.9999	2.92378	102	2.6283
TRINITY_DN11531_c1_g1	5	3.91188	4	2.58555	0	0	4	2.70665	0	0	0	0	1	0.635968	0	0	0	0
TRINITY_DN6975_c0_g1	34	1.92114	26	1.22218	60	3.33062	47	2.17194	158	8.46176	153	4.50241	215	10.4304	103	6.29662	93	4.08783
TRINITY_DN20384_c0_g1	0	0	0	0	0	0	0	0	0	0	0	0	0	0	0	0	2	2.15924
TRINITY_DN6513_c0_g1	0	0	1	2.22305	0	0	0	0	0	0	0	0	0	0	0	0	0	0
TRINITY_DN6513_c0_g2	0	0	1	2.32552	1	2.70637	0	0	0	0	0	0	1	2.1619	0	0	0	0
TRINITY_DN27895_c0_g1	0	0	0	0	0	0	0	0	0	0	0	0	0	0	0	0	2	2.99716
TRINITY_DN10365_c1_g1	23	2.73709	28	2.7594	47	5.45702	7	0.682071	20	2.27301	19	1.18003	10	1.01264	6	0.772847	8	0.727061
TRINITY_DN24724_c0_g1	0	0	2	2.9199	0	0	1	1.5459	0	0	1	0.965362	0	0	0	0	0	0
TRINITY_DN10365_c1_g2	2	0.708446	1	0.288631	3	1.01158	0	0	11	3.83414	0	0	4	1.16765	1	0.384429	0	0
TRINITY_DN13188_c0_g1	673	19.506	852	20.5856	1157	32.9751	694.001	16.3399	1210	33.2945	1125	16.9142	2848	71.7236	837	26.2347	707.999	16.0224
TRINITY_DN11959_c0_g1	28	5.16841	0	0	1	0.0586591	3	1.30301	0	0	5	1.09956	1.99999	0.143465	23	2.49757	187	14.2916
TRINITY_DN14651_c0_g1	0	0	0	0	0	0	0	0	0	0	0	0	0	0	1	1.95514	6	5.98951
TRINITY_DN20602_c0_g1	2	4.10856	0	0	0	0	0	0	0	0	0	0	0	0	0	0	0	0
TRINITY_DN17354_c0_g1	2	2.0194	0	0	0	0	0	0	0	0	0	0	0	0	1	1.17874	3	1.93846
TRINITY_DN20686_c0_g1	0	0	0	0	0	0	0	0	0	0	0	0	0	0	0	0	5	6.01784
TRINITY_DN18636_c0_g1	0	0	0	0	0	0	0	0	0	0	0	0	0	0	0	0	3	5.63126
TRINITY_DN24029_c0_g1	1	1.84637	0	0	0	0	0	0	0	0	1	1.07483	0	0	1	2.23731	0	0
TRINITY_DN3530_c0_g1	44	4.00077	62	4.67809	104	9.25473	24	1.78586	1	0.0865408	15	0.711138	7	0.54378	3	0.295193	5	0.350074
TRINITY_DN27630_c0_g1	0	0	0	0	0	0	0	0	0	0	0	0	0	0	0	0	2	3.30677
TRINITY_DN8347_c0_g1	3	0.624442	10	1.71261	13	2.61444	5	0.853561	9	1.80869	13	1.41643	7	1.2243	9	2.02897	6	0.929564
TRINITY_DN289_c0_g2	3	0.384984	6	0.637194	0	0	7	0.735638	7	0.858858	18	1.20589	2	0.218106	3	0.416727	1	0.0977369
TRINITY_DN289_c0_g1	0	0	0	0	0	0	2	1.31414	0	0	5	2.09628	2	1.23829	0	0	0	0
TRINITY_DN27476_c0_g1	0	0	0	0	0	0	0	0	0	0	0	0	0	0	0	0	4	5.82225
TRINITY_DN22320_c0_g1	13	14.9545	6	5.89109	4	4.52902	4	4.1592	0	0	2	1.31546	0	0	0	0	1	0.727582
TRINITY_DN13599_c0_g1	246	6.43737	339	7.35567	423	10.9309	727	15.6452	382	9.48202	345	4.69344	1637	37.0499	910	25.8865	682	14.0335
TRINITY_DN11977_c0_g1	46	3.32364	34	2.21	35	2.46436	29	1.98673	8	0.410671	31	1.31657	21	0.930074	10	0.743958	20	1.02647
TRINITY_DN25873_c0_g1	2	0.96726	4	1.57102	7	3.19902	36	14.4561	4	1.94664	7	1.7997	15	5.90911	5	2.64418	1	0.334753
TRINITY_DN16201_c0_g1	0	0	0	0	1	1.06846	1	0.979884	1	1.21807	0	0	0	0	0	0	7	4.85049
TRINITY_DN18607_c0_g1	1	1.31508	0	0	0	0	0	0	0	0	0	0	0	0	0	0	5	4.11041
TRINITY_DN16638_c0_g1	0	0	1	0.225958	4	1.05877	5	1.13314	0	0	1	0.144794	3	0.689122	1	0.299053	5	1.00758
TRINITY_DN12105_c0_g1	136	7.99621	105	5.1855	117	6.96961	121	6.01618	80	4.5904	147	4.76398	100	5.26335	28	1.90843	29	1.36621
TRINITY_DN15164_c0_g1	0	0	0	0	1	1.93835	0	0	0	0	2	2.20422	1	1.57009	0	0	0	0
TRINITY_DN16467_c0_g1	0	0	0	0	0	0	0	0	0	0	0	0	0	0	0	0	2	3.63323
TRINITY_DN327_c0_g1	34	3.98143	35	3.39456	26	2.97112	47	4.50622	15	1.67711	35	2.13885	31	3.08981	14	1.77445	33	2.95281
TRINITY_DN26_c0_g1	0	0	4	4.17251	1	1.20221	0	0	1	1.3742	0	0	0	0	0	0	1	0.765089
TRINITY_DN13049_c0_g1	18	2.4069	9	0.994435	5	0.665375	12	1.37267	12	1.60965	14	0.997487	12	1.36852	5	0.805296	7	0.708138
TRINITY_DN1629_c0_g1	310	15.0913	510	20.6665	1397	66.8699	309	12.3007	272	12.5385	299	7.57872	880	36.8228	443	23.3311	205	7.78146
TRINITY_DN4227_c0_g1	1	2.30038	0	0	0	0	0	0	0	0	0	0	0	0	1	2.75379	3	4.20503
TRINITY_DN11030_c0_g1	809	24.0745	850	21.0641	976	28.6013	685	16.6247	1404	39.1183	2097	32.3677	1612	40.9756	1667	53.5078	1862	43.1882
TRINITY_DN27920_c0_g1	0	0	0	0	0	0	0	0	0	0	0	0	0	0	0	0	2	2.65324
TRINITY_DN247_c0_g1	1	3.25186	0	0	0	0	1	2.95743	0	0	0	0	0	0	0	0	3	5.95494
TRINITY_DN27511_c0_g1	0	0	0	0	0	0	0	0	0	0	0	0	0	0	0	0	3	1.79417
TRINITY_DN24846_c0_g1	1	1.48212	1	1.29461	0	0	3	4.11927	0	0	2	1.72202	1	1.22288	2	3.57124	2	1.83826
TRINITY_DN148_c0_g1	3	2.0631	0	0	6	3.54321	26	12.9621	15	9.47324	10	3.28464	17	8.76599	5	3.21397	25	11.2252
TRINITY_DN15559_c0_g1	0	0	0	0	0	0	0	0	0	0	0	0	1	1.71537	1	2.50231	0	0
TRINITY_DN21329_c0_g1	2	1.42626	0	0	2	1.3564	0	0	1	0.75272	3	1.16956	0	0	0	0	0	0
TRINITY_DN21723_c0_g1	0	0	0	0	0	0	0	0	0	0	0	0	0	0	3	3.46347	4	2.54125
TRINITY_DN13787_c0_g4	237	11.867	278	11.5858	189	9.30377	23	0.941759	237	11.239	45	1.17324	20	0.86061	40	2.16683	76	2.96599
TRINITY_DN26811_c0_g1	3	6.64402	0	0	1	2.27569	0	0	0	0	0	0	0	0	2	5.31649	0	0
TRINITY_DN27550_c0_g1	0	0	0	0	0	0	0	0	0	0	0	0	0	0	0	0	2	2.51509
TRINITY_DN22781_c0_g1	0	0	0	0	0	0	0	0	0	0	0	0	0	0	0	0	6	4.39279
TRINITY_DN13853_c2_g4	5	0.808298	5	0.667291	6	0.94192	2	0.264938	1	0.155192	0	0	2	0.273458	2	0.35006	4	0.48775
TRINITY_DN13853_c2_g1	2534.96	87.4548	3346.98	96.0718	3805	129.27	2786.96	78.2403	3672.97	119.78	4349.97	77.7731	5027.94	149.996	2295.98	85.3506	3847.77	103.501
TRINITY_DN14947_c0_g1	0	0	0	0	1	3.08097	0	0	0	0	0	0	2	4.91328	1	3.48766	2	3.67316
TRINITY_DN13853_c2_g3	42.0328	1.41979	33.0197	0.93374	41	1.35078	107.039	2.95331	58.033	1.84769	67.0319	1.17218	68.0536	1.99808	50.0222	1.83134	78.2284	2.06163
TRINITY_DN13853_c2_g2	6054	177.741	11228	272.529	8405	243.085	5471	134.787	1530	50.5094	7242	109.862	1577	73.5865	913	52.0486	1426	61.8594
TRINITY_DN26967_c0_g1	0	0	0	0	0	0	0	0	2	5.77372	0	0	0	0	0	0	0	0
TRINITY_DN25593_c0_g1	2	5.02358	0	0	1	2.57974	0	0	0	0	0	0	1	2.06342	0	0	0	0
TRINITY_DN15159_c0_g1	0	0	0	0	0	0	0	0	0	0	0	0	0	0	0	0	3	4.58331
TRINITY_DN22376_c0_g1	2	3.59822	0	0	0	0	0	0	0	0	0	0	0	0	0	0	0	0
TRINITY_DN13887_c6_g1	7	7.94399	9	8.70695	3	3.34741	1	1.02416	0	0	1	0.648152	1	0.930241	0	0	1	0.718642
TRINITY_DN27281_c0_g1	2	5.71808	0	0	0	0	0	0	0	0	0	0	0	0	0	0	0	0
TRINITY_DN6994_c0_g1	1	2.07318	0	0	0	0	0	0	0	0	0	0	0	0	0	0	3	3.80585
TRINITY_DN24909_c0_g1	0	0	0	0	0	0	0	0	0	0	0	0	0	0	3	6.32166	0	0
TRINITY_DN20297_c0_g1	0	0	0	0	0	0	0	0	0	0	0	0	0	0	0	0	2	3.79563
TRINITY_DN10598_c0_g1	9	0.984451	22	1.99422	14	1.56815	19	1.85311	12	1.34015	10	0.621667	5	0.466026	6	0.773587	25	2.14204
TRINITY_DN5402_c0_g1	9	3.0013	11	2.99241	8	2.54425	7	1.91997	10	3.27172	6	1.05236	1	0.275508	2	0.723436	6	1.4383
TRINITY_DN13980_c1_g1	11	0.662904	14	0.717531	17	1.01113	714.999	32.5945	128	6.78453	1597	46.7046	2852	136.285	3255	198.455	13654	660.777
TRINITY_DN15122_c0_g1	2	0.798242	4	1.29831	1	0.378627	6	1.97547	1	0.395513	5	1.05358	2	0.65464	0	0	1	0.281994
TRINITY_DN13980_c1_g2	24.9999	1.62911	46	2.37987	64	3.99336	37.0001	2.0926	309	20.1632	180	6.48139	179	9.83824	76	5.97506	43	2.46412
TRINITY_DN1728_c0_g1	129	49.0626	273	86.9778	72	26.91	243	75.8095	51	19.3085	238	48.2232	129	42.035	56	23.5932	82	22.4927
TRINITY_DN7338_c0_g1	20.9999	1.76644	21	1.4817	9	0.748817	11	0.760917	5	0.399441	11	0.484756	5	0.36549	4	0.370059	5	0.329685
TRINITY_DN23691_c0_g1	0	0	1	2.39079	0	0	1	2.52445	0	0	0	0	0	0	0	0	1	1.65338
TRINITY_DN20547_c0_g1	0	0	0	0	0	0	0	0	0	0	0	0	0	0	0	0	2	3.34076
TRINITY_DN24795_c0_g1	0	0	0	0	0	0	0	0	0	0	0	0	0	0	0	0	2	2.65324
TRINITY_DN18504_c0_g1	0	0	0	0	0	0	0	0	2	0.851085	2	0.452166	5	1.74765	3	1.39596	0	0
TRINITY_DN15186_c0_g1	0	0	0	0	0	0	0	0	0	0	0	0	0	0	0	0	3	6.0233
TRINITY_DN19254_c0_g1	4	2.0724	1	0.420961	0	0	0	0	0	0	0	0	0	0	2	1.13707	0	0
TRINITY_DN21289_c0_g1	0	0	0	0	2	0.386433	4	0.655351	0	0	0	0	19	3.19352	4	0.865529	1	0.149066
TRINITY_DN11523_c0_g1	305	25.6638	386	26.7077	526	44.4164	235	16.1488	219	17.5764	245	10.9159	688	50.9723	237	22.0794	174	11.0798
TRINITY_DN13983_c2_g2	37	2.39756	35	1.88562	17	1.09363	25	1.36933	31	1.94141	37	1.26879	16	0.889098	7	0.507149	9	0.452551
TRINITY_DN13983_c2_g1	1764	30.4872	1524	21.9825	1540	26.2664	1219	17.2401	848	13.8574	1833	16.472	2323	34.6854	1886	35.3122	3774	51.3885
TRINITY_DN11523_c0_g2	143	7.46474	234	10.189	775	40.1256	119	5.09194	84	4.12708	159	4.32385	972	43.5222	439	24.7919	174	7.05009
TRINITY_DN378_c0_g1	11	1.04764	10	0.790074	10	0.931647	15	1.1692	10	0.906934	8	0.397322	8	0.650542	4	0.412274	9	0.659187
TRINITY_DN9207_c0_g1	131	19.9972	252	32.0103	450	67.8516	96	11.819	104	16.282	207	17.1529	48	6.14726	21	3.61916	30	3.59835
TRINITY_DN2638_c0_g1	6	17.7009	0	0	0	0	0	0	0	0	0	0	0	0	2	6.84713	1	1.79702
TRINITY_DN9804_c0_g1	452	41.73	573	44.3112	614	56.097	210	16.0317	71	6.36176	334	16.2551	171	13.5197	66	6.66183	44	3.07913
TRINITY_DN23035_c0_g1	1	2.95015	1	2.57675	1	3.01773	1	2.71817	0	0	0	0	0	0	0	0	0	0
TRINITY_DN14970_c0_g1	0	0	0	0	0	0	0	0	0	0	0	0	0	0	2	4.59074	0	0
TRINITY_DN17498_c0_g1	1	2.46322	0	0	0	0	0	0	0	0	0	0	0	0	0	0	6	8.99148
TRINITY_DN16928_c0_g1	1	1.47083	0	0	1	1.47799	1	1.3617	1	1.69037	1	0.854205	0	0	0	0	0	0
TRINITY_DN84_c0_g1	1	0.250942	0	0	0	0	0	0	1	0.243563	4	0.526197	7	1.46721	6	1.63127	3	0.553595
TRINITY_DN885_c0_g1	1	1.50504	0	0	0	0	1	1.39604	0	0	0	0	1	1.24243	2	3.62983	0	0
TRINITY_DN885_c0_g2	2	0.609979	3	0.747708	6	1.74997	0	0	0	0	1	0.160206	3	0.758656	0	0	2	0.441872
TRINITY_DN18023_c0_g1	0	0	0	0	0	0	0	0	0	0	0	0	0	0	0	0	2	3.37522
TRINITY_DN27131_c0_g1	0	0	1	1.19241	0	0	5	6.32311	0	0	1	0.795491	1	1.13146	0	0	0	0
TRINITY_DN8024_c0_g1	3	1.7147	1	0.465269	3	2.00278	3	1.73318	2	1.40263	1	0.421676	1	0.464038	3	1.89331	2	0.892587
TRINITY_DN20393_c0_g1	0	0	0	0	0	0	0	0	0	0	0	0	0	0	0	0	2	3.88136
TRINITY_DN7231_c0_g1	21	3.41258	20	2.68294	18	2.65525	36	4.79385	9	1.24815	43	3.48223	22	3.02339	7	1.23161	15	1.83817
TRINITY_DN27603_c0_g1	0	0	0	0	0	0	0	0	0	0	0	0	0	0	0	0	3	5.39105
TRINITY_DN12581_c0_g1	61	3.4332	77	3.53204	51	2.72915	66	3.03715	37.9999	2.05024	101	2.92777	79.9999	3.79669	36	2.22059	27	1.21944
TRINITY_DN4154_c0_g1	3	2.60777	0	0	0	0	0	0	0	0	0	0	0	0	0	0	9	5.07965
TRINITY_DN15485_c0_g1	3	6.77218	0	0	0	0	0	0	0	0	0	0	0	0	1	2.70567	3	4.12843
TRINITY_DN23558_c0_g1	0	0	6	1.3587	1	0.265262	2	0.454268	0	0	2	0.290237	1	0.230198	0	0	2	0.403859
TRINITY_DN13724_c0_g2	10	2.46273	11	2.32871	10	2.23921	5	1.05992	4	1.00344	9	1.15986	6	1.14007	2	0.559576	6	1.09701
TRINITY_DN11680_c0_g2	54	3.88771	123	7.35857	133	9.39074	86	5.06514	127	8.68238	166	6.22738	229	14.1237	120	9.34799	33	1.83969
TRINITY_DN11680_c0_g1	391	12.4384	432	11.4535	795	24.9136	298	7.7495	439	13.1972	683	11.3064	1009	27.6568	629	21.6447	496	12.3653
TRINITY_DN13724_c0_g1	3485	77.9806	4157	76.077	5252	113.998	3285	59.246	5276.99	106.882	6065	69.7455	8208	153.736	6184	144.502	6769	115.145
TRINITY_DN13044_c0_g1	27	2.66483	28	2.64082	56	12.6962	9	0.730267	6	0.806227	11	0.553972	126	11.3638	37.0001	3.85657	15	2.49933
TRINITY_DN15993_c0_g1	2	4.10856	0	0	0	0	0	0	0	0	0	0	0	0	0	0	0	0
TRINITY_DN23120_c0_g1	0	0	0	0	1	2.23208	1	2.03876	1	2.50658	0	0	0	0	0	0	0	0
TRINITY_DN15247_c0_g1	2	5.54667	0	0	0	0	0	0	0	0	0	0	0	0	0	0	2	3.37522
TRINITY_DN21634_c0_g1	2	3.72511	0	0	0	0	0	0	0	0	0	0	0	0	0	0	3	3.43029
TRINITY_DN17341_c0_g1	2	2.25449	0	0	3	3.32301	0	0	0	0	0	0	0	0	2	2.66236	1	0.714249
TRINITY_DN19909_c0_g1	0	0	0	0	0	0	0	0	0	0	0	0	0	0	0	0	2	2.99716
TRINITY_DN11274_c0_g1	950	19.3608	1219	20.7145	1280	25.7344	938	15.6088	2916	56.0232	2444	25.8863	3151	55.432	1872	41.2644	1370	21.9526
TRINITY_DN4060_c0_g1	396	58.4369	404	49.5482	554	73.2775	169	19.3952	5	0.45889	67	4.69089	41	2.63742	14	1.20793	17	1.31047
TRINITY_DN26204_c0_g1	0	0	0	0	0	0	0	0	2	3.43706	1	0.867926	0	0	0	0	0	0
TRINITY_DN14926_c0_g1	0	0	0	0	0	0	0	0	0	0	0	0	0	0	0	0	3	3.51856
TRINITY_DN19295_c0_g1	0	0	0	0	0	0	0	0	0	0	0	0	0	0	0	0	4	7.6761
TRINITY_DN26410_c0_g1	2	5.77666	0	0	0	0	0	0	0	0	0	0	0	0	0	0	0	0
TRINITY_DN9007_c0_g1	8	0.63469	4	0.263564	0	0	16	1.03859	11	0.82944	58	2.3983	55	3.73414	25	2.1462	35	2.14549
TRINITY_DN16359_c0_g1	2	0.470587	6	1.1593	5	1.13334	1	0.193072	1	0.227934	0	0	5	0.984791	2	0.509783	3	0.521364
TRINITY_DN11989_c0_g1	24	0.79139	34	0.934308	153	4.96933	64	3.28417	52	1.6206	70	1.6969	121	3.43729	45	1.60513	21	0.542478
TRINITY_DN20785_c0_g1	8	0.57629	5	0.299301	77	5.43986	2	0.117862	2	0.13681	6	0.225217	19	1.17251	4	0.31178	4	0.223119
TRINITY_DN11989_c0_g2	0	0	0	0	0	0	0	0	0	0	3	2.33142	2	2.21193	0	0	0	0
TRINITY_DN10731_c0_g1	528	39.1548	680	41.8297	1009	73.2168	331	19.9907	305	21.3087	776	29.8047	1273	80.3023	439.001	34.943	212	11.9324
TRINITY_DN24116_c0_g1	0	0	0	0	0	0	0	0	0	0	0	0	0	0	2	6.21731	0	0
TRINITY_DN21951_c0_g1	0	0	0	0	0	0	0	0	0	0	0	0	0	0	2	6.21731	0	0
TRINITY_DN13642_c1_g1	2006	22.0954	2948	27.313	2603	32.7805	3359	30.4803	1931	22.806	3864	22.4779	3797	37.1205	2558	31.2372	1641	14.3632
TRINITY_DN13642_c1_g2	1	0.626884	3	1.53552	1	0.593468	5	2.64949	3	1.95052	0	0	2	1.01737	2	1.39447	10	4.21662
TRINITY_DN13642_c1_g3	354	21.0551	386	18.8586	530	30.5728	616	29.721	125	6.95508	492	15.4067	1297	66.4716	377	23.9592	410	19.1405
TRINITY_DN7389_c0_g1	0	0	0	0	0	0	0	0	0	0	0	0	0	0	0	0	7	5.49571
TRINITY_DN23646_c0_g1	0	0	0	0	0	0	0	0	0	0	2	1.1896	2	1.71605	0	0	0	0
TRINITY_DN12028_c0_g2	3	0.906113	0	0	0	0	0	0	2	0.495359	1	0.158635	4	0.851656	5	1.38171	0	0
TRINITY_DN12028_c0_g1	182	8.18762	263	9.85124	316	13.9837	82	3.01632	86	3.66189	117	2.74018	266	10.2912	129	6.27814	74	2.5986
TRINITY_DN6995_c0_g1	15	0.93734	14	0.727486	63	3.86502	29	1.48225	55	3.25991	48	1.56245	129	6.91515	43	2.90725	31	1.50426
TRINITY_DN27280_c0_g1	1	2.95015	0	0	0	0	0	0	0	0	0	0	0	0	0	0	1	1.79702
TRINITY_DN7144_c0_g1	658	68.6374	781	63.068	857	81.4903	249	19.8397	251	24.7522	351	17.821	453	37.6196	103	10.8292	84	6.28802
TRINITY_DN5606_c0_g1	39	5.14809	61	6.66183	77	9.90254	41	4.4324	15	1.89395	43	2.96359	68	7.62393	45	6.43004	38	3.81625
TRINITY_DN17029_c0_g1	0	0	0	0	0	0	0	0	0	0	0	0	0	0	0	0	5	8.61386
TRINITY_DN3992_c0_g1	302	9.26076	516	13.1589	1029	31.1176	238	5.94979	195	5.64768	498	7.93846	769	20.3348	688	22.8089	564	13.5638
TRINITY_DN22921_c0_g1	0	0	0	0	0	0	0	0	0	0	0	0	0	0	0	0	2	2.67764
TRINITY_DN22735_c0_g1	0	0	0	0	0	0	0	0	2	6.75526	0	0	0	0	0	0	0	0
TRINITY_DN9448_c0_g1	10	0.679469	3	0.175736	8	0.533338	6	0.339958	13	0.83837	24	0.84961	34	2.03432	13	0.955735	10	0.52677
TRINITY_DN24857_c0_g1	0	0	0	0	0	0	0	0	0	0	0	0	0	0	0	0	2	2.75229
TRINITY_DN8631_c0_g1	8	2.29408	5	1.17311	3	0.824208	3	0.70665	3	0.838736	4	0.602074	2	0.476688	1	0.310788	3	0.626322
TRINITY_DN11249_c0_g1	1669.01	30.2735	1991	30.1691	2181	39.1195	2048	30.3197	1497.99	25.6613	3261	30.8169	3051	47.876	4249	83.4872	3113	44.5338
TRINITY_DN19302_c0_g1	1	1.73954	0	0	1	1.77135	2	3.2558	0	0	2	2.02727	0	0	0	0	0	0
TRINITY_DN1876_c0_g1	2	5.96498	0	0	0	0	0	0	0	0	0	0	0	0	0	0	2	3.63323
TRINITY_DN23098_c0_g1	332	5.43933	227	3.0938	688	11.0675	160	2.13156	392	6.05905	773	6.55418	2019	28.5265	665	11.7632	412	5.32894
TRINITY_DN17810_c0_g1	2	5.43364	0	0	0	0	0	0	0	0	0	0	0	0	0	0	0	0
TRINITY_DN23591_c0_g1	2	4.78359	0	0	0	0	0	0	0	0	0	0	0	0	0	0	0	0
TRINITY_DN25064_c0_g1	0	0	0	0	0	0	0	0	0	0	0	0	0	0	0	0	3	4.90987
TRINITY_DN13319_c0_g1	27	0.791926	36	0.892977	47	1.41888	386	9.41048	47	1.30233	198	3.06329	961	24.45	1116	35.6207	2551	59.1495
TRINITY_DN4029_c0_g1	10	1.09287	0	0	0	0	3	0.2684	1	0.104248	0	0	2	0.186249	11	1.30111	113	9.45809
TRINITY_DN11232_c0_g1	772	207.27	1025	225.697	1157	302.686	402	88.6821	82	21.3223	415	59.1514	217	46.8346	59	16.9148	56	10.9504
TRINITY_DN293_c0_g1	0	0	1	0.215652	0	0	5	1.08019	1	0.255786	4	0.552006	4	0.877669	0	0	0	0
TRINITY_DN26319_c0_g1	1	1.66967	0	0	0	0	0	0	0	0	0	0	0	0	0	0	2	2.05985
TRINITY_DN15606_c0_g1	0	0	0	0	0	0	0	0	0	0	0	0	0	0	0	0	2	3.92538
TRINITY_DN12740_c0_g1	292	12.8073	355	13.1475	522	23.1389	207	7.28177	273	11.0108	271	5.96505	907	35.4585	309	14.9804	314	10.7956
TRINITY_DN19219_c0_g1	2	1.07854	5	2.19209	3	1.52816	0	0	0	0	1	0.288415	1	0.438179	0	0	2	0.737684
TRINITY_DN25511_c0_g1	0	0	0	0	0	0	0	0	1	2.1983	1	1.10211	0	0	0	0	0	0
TRINITY_DN12556_c0_g1	515	14.5374	423	9.95055	289	8.02795	160	3.71383	22	0.597198	172	2.5339	46	1.14208	14	0.424469	27	0.600052
TRINITY_DN25736_c0_g1	4	0.53139	5	0.549515	2	0.258832	7	0.76161	3	0.381255	18	1.24855	6	0.676926	0	0	0	0
TRINITY_DN20474_c0_g1	0	0	0	0	0	0	0	0	0	0	0	0	0	0	0	0	3	5.22241
TRINITY_DN7561_c0_g1	121	11.524	121	9.55989	56	5.21722	119	9.27566	34	3.08357	131	6.50615	71	5.77356	60	6.18412	75	5.49322
TRINITY_DN11296_c0_g1	702	20.0519	934	22.0196	1228	34.4503	1182	27.5128	446	11.8379	1480	21.9362	1113	27.3656	752.001	23.327	401.001	8.92677
TRINITY_DN7403_c0_g1	564	25.4554	812	30.5142	981	43.5523	487	17.9725	544	23.2396	737	17.3172	1345	52.2053	632	30.8584	611	21.5251
TRINITY_DN12377_c0_g1	47572	1379.25	66065	1596.38	35665	1017.14	14289	343.717	4747	132.182	9854	150.19	2419	60.4858	1647	51.6488	3756	85.2132
TRINITY_DN11841_c0_g1	1693	78.14	2809	107.97	3151	143.103	763	30.2341	776	36.2652	1253	30.4322	2406	98.1429	1223	61.493	642	23.1021
TRINITY_DN12377_c0_g2	3887	245.831	4861	254.724	2373	148.324	1692	86.7711	227	13.4524	725	23.9484	697	38.692	294	20.4648	326	16.2311
TRINITY_DN20600_c0_g1	0	0	0	0	0	0	0	0	0	0	0	0	0	0	2	4.87713	0	0
TRINITY_DN9488_c0_g1	320	10.5659	327	9.012	430	13.9978	607	16.3337	802	24.9292	1008	17.2649	1145	32.5444	840	29.9406	877	22.6747
TRINITY_DN7737_c0_g1	11	1.20216	23	2.08306	19	2.02807	14	1.25254	43	4.48266	24	1.36842	52	4.84248	11	1.30111	1	0.0836999
TRINITY_DN25335_c0_g1	0	0	0	0	1	3.17338	0	0	0	0	0	0	0	0	0	0	3	5.69345
TRINITY_DN2396_c0_g1	1	2.83038	1	2.48103	4	11.5958	0	0	0	0	0	0	0	0	0	0	0	0
TRINITY_DN9967_c0_g1	31	6.40807	18	3.16909	17.0001	3.43077	15	2.55332	6	1.24818	16	1.74814	8	1.35734	5	1.09245	10	1.50432
TRINITY_DN553_c0_g1	0	0	0	0	0	0	0	0	0	0	0	0	0	0	0	0	4	6.75044
TRINITY_DN13190_c0_g1	768	49.8586	857.001	45.8483	1737	113.36	732	39.6747	1102	70.4102	584	20.1994	1881	104.801	602	43.2959	491	25.002
TRINITY_DN19841_c0_g1	2	5.77666	0	0	0	0	0	0	0	0	0	0	0	0	1	3.36265	0	0
TRINITY_DN18604_c0_g1	22	6.05782	0	0	1	0.264124	1	0.226124	0	0	1	0.144471	0	0	1	0.29839	3	0.603316
TRINITY_DN16223_c0_g1	0	0	0	0	0	0	1	2.64243	0	0	0	0	0	0	1	3.33411	5	8.70401
TRINITY_DN3232_c0_g2	2	0.416295	0	0	6	1.20666	0	0	9	1.80869	0	0	0	0	0	0	0	0
TRINITY_DN3232_c0_g1	0	0	2	1.33835	1	0.773989	2	1.40299	1	0.868126	0	0	0	0	0	0	0	0
TRINITY_DN8979_c0_g1	38	2.00262	37	1.63478	38	1.99032	151	6.50775	84	4.19391	63	1.72892	104	4.71913	39	2.22361	39	1.60067
TRINITY_DN10945_c0_g2	53	4.30568	74	5.03001	239	19.0676	32	2.12274	77	5.86491	74	3.10328	272	18.8781	80	7.00043	66	3.94041
TRINITY_DN10945_c0_g3	0	0	2	0.694485	2	0.8094	1	0.353169	3	1.27663	6	1.3565	1	0.34953	0	0	2	0.599595
TRINITY_DN7941_c0_g1	0	0	3	1.66861	0	0	2	1.15647	1	0.71177	1	0.369553	1	0.550925	1	0.760555	0	0
TRINITY_DN10945_c0_g1	78	3.14524	58	1.94798	222	8.81018	86	2.83529	326	12.4352	312	6.54866	478.881	16.618	247	10.7745	188	5.92576
TRINITY_DN20360_c0_g1	0	0	0	0	0	0	0	0	0	0	0	0	0	0	0	0	2	2.30611
TRINITY_DN21232_c0_g1	0	0	3	6.97657	1	2.70637	0	0	0	0	1	1.48925	0	0	0	0	0	0
TRINITY_DN8446_c0_g1	185	11.1195	373	18.6462	749	44.2096	41	2.01557	55	3.13465	62	1.94103	102	5.26102	46	2.99139	34	1.58803
TRINITY_DN26738_c0_g1	2	4.87818	0	0	0	0	0	0	0	0	0	0	0	0	0	0	0	0
TRINITY_DN4703_c0_g1	0	0	3	0.801452	12	3.74861	0	0	0	0	0	0	0	0	0	0	0	0
TRINITY_DN10252_c0_g1	241.001	6.18944	411	8.7957	587	14.8956	84	1.76208	125	3.03895	196	2.6251	583	12.9116	179	4.98481	66	1.33395
TRINITY_DN11377_c0_g1	996	52.2019	1424	62.0834	1161	59.7241	2102	90.1722	833	41.4018	1993	54.3691	1648	74.6268	804	45.0591	764	30.7904
TRINITY_DN4101_c0_g1	0	0	0	0	0	0	0	0	0	0	0	0	0	0	0	0	6	7.67898
TRINITY_DN9495_c0_g2	4	3.12951	2	1.29277	1	0.747871	0	0	1	0.836762	2	0.863196	0	0	2	1.77853	0	0
TRINITY_DN9495_c0_g1	54	9.65862	104	15.9822	88	14.8572	40	5.96207	4	0.752756	23	2.23579	16	2.47489	13	2.73713	24	3.14033
TRINITY_DN14234_c2_g1	3	8.66499	0	0	0	0	0	0	0	0	0	0	0	0	0	0	0	0
TRINITY_DN13051_c0_g1	1181	30.8918	1663	36.4664	1993	51.6863	1505	32.0637	2822	69.8754	2638	36.5871	4304	97.4948	2502	74.3255	1633	33.796
TRINITY_DN25405_c0_g1	1	3.0811	0	0	0	0	0	0	0	0	0	0	0	0	0	0	4	7.50835
TRINITY_DN8409_c0_g2	2	1.06777	2	0.876836	3	1.51295	0	0	0	0	2	0.576829	3	1.31454	0	0	0	0
TRINITY_DN14645_c0_g1	1	2.48752	0	0	0	0	0	0	0	0	0	0	0	0	0	0	2	3.02624
TRINITY_DN8670_c0_g1	135	9.16782	152	8.58014	388	25.8529	117	6.49948	161	10.3772	268	9.48212	496	28.8723	145	10.6543	107	5.63343
TRINITY_DN8409_c0_g1	530	20.7269	546	17.7864	508	19.5548	131	4.18852	47	1.73848	263	5.35348	38	1.27912	26	1.09994	46	1.4067
TRINITY_DN23018_c0_g1	0	0	0	0	0	0	0	0	0	0	0	0	1	2.33506	1	3.33411	1	1.7408
TRINITY_DN10596_c0_g1	1422	156.842	1667	152.342	1313	141.373	2093	188.399	1607	168.15	2100	120.205	3055	287.124	1445	172.207	2285	192.159
TRINITY_DN19274_c0_g1	3	5.73591	0	0	0	0	0	0	0	0	0	0	0	0	0	0	3	3.51856
TRINITY_DN12455_c0_g1	3	0.282263	5	0.261647	14	1.03493	15	0.720899	98	6.21924	64	2.36909	49.0001	2.7106	13	1.06947	5	0.3006
TRINITY_DN25575_c0_g1	0	0	1	0.360389	0	0	3	1.10133	2	0.886221	2	0.470057	4	1.44957	0	0	0	0
TRINITY_DN24394_c0_g1	0	0	0	0	0	0	0	0	0	0	0	0	0	0	0	0	2	2.40714
TRINITY_DN23428_c0_g1	0	0	1	0.224981	5	1.31779	1	0.225622	0	0	0	0	3	0.686196	2	0.59546	7	1.40487
TRINITY_DN10686_c0_g1	29	2.8633	36	3.74803	21	1.82746	49	5.46959	1115	80.6272	119	5.41495	70	5.08413	48	3.60969	65	3.3321
TRINITY_DN17993_c0_g1	2	6.50372	0	0	0	0	0	0	0	0	0	0	0	0	0	0	1	1.98498
TRINITY_DN27828_c0_g1	0	0	0	0	0	0	1	2.28102	0	0	0	0	0	0	0	0	1	1.48405
TRINITY_DN14197_c1_g8	47	13.3854	67	15.3996	139	35.7783	43	9.27626	46	12.1592	36	4.77228	182	39.7313	51	14.407	42	8.12673
TRINITY_DN14197_c1_g9	665	156.963	779	150.92	574	131.064	117	22.5894	5	1.13967	69	8.50624	7	1.37871	3	0.834919	21	4.26499
TRINITY_DN7518_c0_g1	3	0.590853	5	0.810897	3	0.571574	7	1.52509	3	0.890245	4	0.412226	10	2.0362	4	0.853187	8	1.89194
TRINITY_DN1988_c0_g1	0	0	0	0	0	0	0	0	0	0	1	0.965362	0	0	2	4.00905	4	4.08754
TRINITY_DN14197_c1_g2	2584	73.5271	2623	67.2883	2123	70.0286	1679	43.183	1416	44.4836	2215	36.6139	2879	100.227	1204	46.7014	769	19.873
TRINITY_DN14197_c1_g3	953	37.9888	1116.15	33.4377	1514	49.9452	381	14.9089	419	23.1075	513	12.377	637.929	18.7157	309	12.7545	289	11.3812
TRINITY_DN14197_c1_g4	44608	1821.4	71511	2449.91	28340	1194.26	51964	1362.05	27136	1109.99	31241	601.94	14297	502.586	8266	360.046	11881	354.013
TRINITY_DN14197_c1_g5	840	35.5451	991	34.9139	1447	60.3024	1049	36.2746	763	30.599	935	20.6154	1149	41.851	459	21.0594	785	25.8886
TRINITY_DN14197_c1_g6	25894	2079.11	26565	2050.67	22998	2088.47	23863	1958.13	27350	2933.53	42852	2474.64	27537	2893.89	18075	1746.51	30561	2124.73
TRINITY_DN14197_c1_g7	3	1.43495	2	0.782587	3	1.63676	1	0.390869	0	0	0	0	0	0	1	0.693803	1	0.419955
TRINITY_DN13119_c0_g1	191	5.75445	256	6.6578	562	18.2022	171	5.40269	154	4.72739	255	3.9941	758	18.0217	428	10.05	192	3.27795
TRINITY_DN23932_c0_g1	6	1.08554	0	0	11	1.92858	1	0.148308	0	0	0	0	0	0	1	0.195915	0	0
TRINITY_DN9073_c0_g1	72	4.01085	44	2.03604	34	1.85144	97	4.40456	14	0.735326	31	0.901484	14	0.719004	14	0.83946	20	0.862551
TRINITY_DN14715_c0_g1	229	39.7557	269	38.52	376	63.307	69	9.81803	16	2.67048	82	7.44309	120	17.5904	63	11.8429	42	5.48101
TRINITY_DN2379_c1_g1	2	2.81049	0	0	0	0	1	1.29602	0	0	2	1.6289	0	0	0	0	2	1.74883
TRINITY_DN16403_c0_g1	3	3.47447	2	1.97834	0	0	2	2.09558	2	2.60468	1	0.662552	1	0.949789	0	0	0	0
TRINITY_DN8772_c0_g1	3	5.30648	0	0	0	0	0	0	0	0	0	0	0	0	0	0	2	2.1766
TRINITY_DN18460_c0_g1	3	6.10703	0	0	0	0	0	0	0	0	0	0	0	0	1	2.45966	1	1.24651
TRINITY_DN9279_c0_g1	42	11.3397	40	9.12216	32	9.04808	93.0001	20.9373	14	2.99598	30	4.29071	36	8.81883	16	4.93666	17	2.90861
TRINITY_DN22634_c0_g1	0	0	0	0	0	0	0	0	0	0	0	0	0	0	0	0	2	2.82965
TRINITY_DN1949_c0_g1	25	1.92334	36	2.30065	56	4.22294	18	1.13298	10	0.730989	27	1.08255	82	5.40052	33	2.74715	22	1.30868
TRINITY_DN13920_c0_g1	12630	569.006	16977	654.462	41629	1932.49	13233	525.272	15187	705.244	10252	253.937	36253	1587.54	17398	886.955	10879	367.595
TRINITY_DN13920_c0_g2	129	3.98556	195	5.02576	250	7.60711	219	5.52845	161	4.70692	381	6.12695	444	11.8231	123	4.11523	87	2.1082
TRINITY_DN13920_c0_g3	1612	66.2501	1717	58.8172	2423	97.6977	1789	60.0099	2288	89.0026	1981	42.3931	3222	113.823	1423	63.3068	1654	53.1718
TRINITY_DN13750_c0_g2	4	0.346496	13	0.934768	11	0.932988	8	0.567072	0	0	4	0.180637	21	1.5551	19	1.78104	20	1.33573
TRINITY_DN13750_c0_g1	4005	144.632	6633	198.12	6674	237.143	541	15.7557	470	16.1278	491	9.14502	1503	47.2645	996.001	39.0106	1217	34.3636
TRINITY_DN8602_c0_g1	2	2.44871	1	2.86461	2	6.74555	1	1.11447	0	0	1	0.703492	1	1.0053	1	1.45601	1	0.770039
TRINITY_DN17766_c0_g1	0	0	0	0	0	0	0	0	0	0	0	0	0	0	0	0	3	3.18793
TRINITY_DN22009_c0_g1	0	0	0	0	0	0	0	0	0	0	0	0	0	0	0	0	2	2.91113
TRINITY_DN6696_c0_g1	1	2.21467	4	7.87711	0	0	0	0	0	0	0	0	0	0	0	0	0	0
TRINITY_DN12338_c0_g1	494	43.9949	543	40.5417	306	27.7484	157	11.3908	15	1.2654	174	8.20729	21	1.57926	18	1.72698	28	1.9274
TRINITY_DN5531_c0_g1	68	4.6947	60	3.41787	142	9.57416	71	3.99437	126	8.2413	158	5.68344	313	18.4994	124	9.26294	75	4.01302
TRINITY_DN14022_c3_g2	24009	797.188	36800	965.604	24101	748.046	17701	507.406	11134	401.376	22081	395.775	14114.8	548.79	15345	504.039	17327	410.142
TRINITY_DN14022_c3_g1	2741	66.996	2804	56.8631	1305	31.7294	3155	70.3539	4960.99	118.609	3774	46.6454	3153.24	70.6851	3184	82.3865	5779	109.398
TRINITY_DN18429_c0_g1	3	7.03577	0	0	2	4.81981	0	0	0	0	0	0	0	0	0	0	0	0
TRINITY_DN10948_c0_g1	65	9.05972	75	8.85797	274	36.8289	30	3.36265	124	16.2103	79	5.61465	871	104.729	149	21.7615	104	10.4921
TRINITY_DN13877_c4_g1	3993	84.3943	3376	59.1501	4319.01	90.1664	1862	31.9861	272	5.26829	2194	23.9551	1484	26.9884	1069	24.4052	711	11.8008
TRINITY_DN13877_c4_g3	0	0	0	0	1	1.20221	1	1.1059	0	0	0	0	1	0.998063	0	0	0	0
TRINITY_DN13877_c4_g2	13	10.2582	13	8.47041	26	19.5797	11.7529	8.13042	8	6.70258	20	8.61985	14	8.9049	14	12.5447	161	83.2035
TRINITY_DN18073_c0_g1	2	3.82394	0	0	0	0	0	0	0	0	0	0	0	0	0	0	0	0
TRINITY_DN8049_c0_g1	19	1.1554	26	1.31491	45	2.68705	61	3.03397	395	22.7363	292	9.20505	61	3.18286	28	1.84221	15	0.708665
TRINITY_DN12917_c0_g1	3604	185.457	4379	187.533	7052	356.704	9304	391.524	3417	166.557	9016	241.587	14318	633.049	9218	513.181	8904	356.966
TRINITY_DN12917_c0_g2	0	0	0	0	0	0	0	0	0	0	1	1.5426	0	0	0	0	0	0
TRINITY_DN8433_c0_g1	2	0.446935	2	0.367323	1	0.215553	6	1.09997	19	4.10711	7	0.81925	6	1.12422	7	1.69442	2	0.331214
TRINITY_DN8433_c0_g2	1	0.541464	5	2.20121	0	0	1	0.452468	1	0.551389	3	0.869001	3	1.3198	3	1.78711	0	0
TRINITY_DN15178_c0_g1	5	1.98309	7	2.25801	3	1.12895	9	2.9442	2	0.785746	9	1.88424	0	0	0	0	4	1.12163
TRINITY_DN14279_c1_g1	19.003	16.3632	1	0.317666	4	2.36101	88	50.1014	31.0839	38.133	2	1.89748	62.2374	42.5393	4	6.94034	44	16.7236
TRINITY_DN21915_c0_g1	1	2.1515	0	0	0	0	1	2.01934	0	0	0	0	1	1.77785	1	2.58808	0	0
TRINITY_DN25090_c0_g1	3	7.31726	0	0	0	0	0	0	0	0	0	0	0	0	1	2.90237	0	0
TRINITY_DN20737_c0_g1	0	0	0	0	0	0	0	0	0	0	0	0	0	0	0	0	5	5.81431
TRINITY_DN12813_c0_g1	3	1.30835	4	1.41717	0	0	2	0.72129	0	0	1	0.478194	0	0	3	1.93626	14	4.52731
TRINITY_DN9416_c0_g1	502	60.4333	557	55.5238	760	89.2516	554	54.6089	465	53.4698	564	35.4365	1175	120.342	363	47.3003	329	30.2352
TRINITY_DN7883_c0_g1	1757	65.8915	1963	61.3568	1672	61.8529	1923	58.967	2431	86.2095	4199	81.9538	5103	164.957	2572	104.287	2099	61.45
TRINITY_DN19477_c0_g1	4	2.96987	0	0	1	0.707718	1	0.638419	0	0	0	0	0	0	1	0.839403	1	0.490356
TRINITY_DN17082_c0_g1	0	0	0	0	0	0	0	0	0	0	0	0	0	0	0	0	5	4.02913
TRINITY_DN16205_c0_g1	0	0	0	0	0	0	0	0	1	1.98198	0	0	2	2.83293	0	0	0	0
TRINITY_DN14452_c0_g1	0	0	0	0	0	0	0	0	1	3.4348	0	0	0	0	4	14.3344	0	0
TRINITY_DN22287_c0_g1	0	0	0	0	0	0	0	0	0	0	2	2.78104	0	0	0	0	3	4.45215
TRINITY_DN17364_c0_g1	15	3.30455	16	2.89764	11	2.33831	25	4.51807	16	3.40832	20	2.30733	12	2.21758	16	3.81804	66	10.785
TRINITY_DN22894_c0_g1	0	0	0	0	0	0	0	0	0	0	0	0	0	0	0	0	2	3.24035
TRINITY_DN465_c0_g1	4	11.0933	2	4.87098	0	0	0	0	0	0	0	0	0	0	0	0	1	1.68761
TRINITY_DN530_c0_g1	1	2.19335	0	0	0	0	0	0	0	0	0	0	0	0	0	0	2	2.67764
TRINITY_DN9849_c0_g1	2576	120.615	2465	96.0684	2108	97.0842	1942	74.2761	2217	98.1444	2283	55.6138	4446	178.968	1605	81.2771	2217	80.94
TRINITY_DN14380_c0_g1	0	0	5	1.68576	1	0.393099	4	1.37002	0	0	0	0	0	0	3	1.35398	6	1.75145
TRINITY_DN21781_c0_g1	0	0	1	2.50416	0	0	0	0	0	0	0	0	1	2.33506	0	0	0	0
TRINITY_DN24806_c0_g1	1	1.13486	0	0	1	1.1158	1	1.02416	1	1.27353	4	2.59261	3	2.79072	0	0	1	0.718642
TRINITY_DN27112_c0_g1	0	0	0	0	0	0	0	0	0	0	0	0	0	0	0	0	3	3.94404
TRINITY_DN22615_c0_g1	0	0	0	0	0	0	0	0	0	0	0	0	0	0	0	0	5	4.37208
TRINITY_DN19263_c0_g1	1	2.91867	0	0	0	0	1	2.69239	0	0	0	0	0	0	0	0	0	0
TRINITY_DN22326_c0_g1	0	0	0	0	0	0	2	5.7488	0	0	0	0	0	0	0	0	0	0
TRINITY_DN16862_c0_g1	2	3.36697	0	0	0	0	0	0	0	0	0	0	0	0	0	0	0	0
TRINITY_DN2488_c0_g1	3	4.88816	0	0	0	0	0	0	1	1.88338	1	0.949497	0	0	0	0	0	0
TRINITY_DN24449_c0_g1	0	0	0	0	0	0	0	0	10	18.8338	0	0	0	0	0	0	0	0
TRINITY_DN21148_c0_g1	3	0.411271	4	0.453512	0	0	2	0.22457	2	0.262423	8	0.572715	7	0.814478	9	1.33563	15	1.56217
TRINITY_DN28027_c0_g1	0	0	0	0	0	0	0	0	0	0	0	0	0	0	0	0	2	2.55966
TRINITY_DN16527_c0_g1	0	0	1	0.621535	0	0	0	0	2	1.60472	0	0	1	0.612622	2	1.70776	0	0
TRINITY_DN13683_c0_g1	174	5.21931	133	3.31554	229	6.7455	214	5.25933	55	1.54345	276	4.31933	174	4.40292	95.9999	3.03668	83	1.95205
TRINITY_DN8383_c0_g1	4	1.18592	7	1.62735	5	1.54337	6	1.90151	3	1.24787	2	0.466708	7	1.18395	2	0.88542	0	0
TRINITY_DN7954_c0_g1	208	15.7204	303	19.0247	507	37.5652	188	11.6247	184	13.2112	300	11.816	369	23.8791	178	14.5569	125	7.30769
TRINITY_DN10958_c0_g1	27	1.97528	19	1.6113	84	6.59405	5	0.290946	1	0.0675378	6	0.346126	71	4.62472	28	2.15501	20	2.16234
TRINITY_DN13941_c1_g1	380	11.5592	253	6.34224	181	5.30191	224	5.51296	177	5.03889	232	3.58809	96	2.61962	79.9999	2.7106	242	5.84411
TRINITY_DN18481_c0_g1	0	0	0	0	0	0	0	0	0	0	0	0	0	0	0	0	2	3.11541
TRINITY_DN27530_c0_g1	2	5.54667	0	0	0	0	0	0	0	0	0	0	0	0	0	0	0	0
TRINITY_DN12461_c0_g1	1491	38.0475	2052	42.6308	2672	65.8878	685	14.8569	643	13.9537	1071	14.0454	2589	50.3488	1039	25.389	876	16.0055
TRINITY_DN9943_c0_g1	7	15.5244	0	0	0	0	1	2.13618	0	0	1	1.30681	0	0	1	2.72963	0	0
TRINITY_DN25597_c0_g1	0	0	0	0	0	0	1	2.05829	0	0	0	0	0	0	0	0	3	4.01647
TRINITY_DN5363_c0_g1	0	0	0	0	0	0	0	0	1	0.449841	0	0	11	9.27538	0	0	0	0
TRINITY_DN10578_c0_g1	4165	125.691	4482	112.753	2029	60.4152	1388	34.0912	469	13.3914	1848	28.922	937	24.0383	975	31.7093	1915	44.8031
TRINITY_DN18704_c0_g1	7	1.63164	9	1.72294	0	0	3	0.573771	1	0.22574	4	0.488462	1	0.195175	1	0.252502	3	0.516805
TRINITY_DN22881_c0_g1	1	2.71682	0	0	0	0	0	0	0	0	0	0	3	6.6768	0	0	0	0
TRINITY_DN25544_c0_g1	47	2.96378	51	2.67418	107	6.62383	32	1.65052	8	0.478525	43	1.41249	73	3.94858	23	1.56923	13	0.636464
TRINITY_DN21022_c0_g1	0	0	0	0	0	0	0	0	0	0	0	0	0	0	0	0	4	4.61223
TRINITY_DN18366_c0_g1	168	9.97255	193	9.52894	375	21.8617	91	4.41805	120	6.75384	201	6.21451	691	35.2027	239	15.3495	102	4.70605
TRINITY_DN18649_c0_g1	2	0.388979	1	0.160181	0	0	0	0	0	0	0	0	0	0	2	0.421255	27	3.92382
TRINITY_DN7582_c0_g1	22.0001	1.59963	19	1.12281	23	1.60372	6	0.368091	20	1.42465	21	0.781556	76	4.88008	34	2.75875	26	1.50836
TRINITY_DN14888_c0_g1	0	0	1	0.974606	2	2.24798	2	2.06382	0	0	0	0	0	0	0	0	0	0
TRINITY_DN7759_c0_g1	0	0	2	0.676488	0	0	0	0	0	0	1	0.219981	0	0	0	0	10	2.92765
TRINITY_DN25049_c0_g1	0	0	0	0	0	0	0	0	0	0	0	0	0	0	0	0	4	6.61353
TRINITY_DN20471_c0_g1	2	2.74859	0	0	1	1.37322	0	0	0	0	1	0.795491	0	0	0	0	0	0
TRINITY_DN10014_c0_g1	95.9999	6.31548	146	7.95456	99	6.69942	200	10.9541	6	0.366183	38	1.26265	13	0.74112	3	0.215839	6	0.342745
TRINITY_DN16618_c0_g1	72	15.2156	130	22.5988	86	17.5537	75	12.9998	76	15.5128	126	13.9397	104	18.4593	65	14.8779	62	9.74343
TRINITY_DN5143_c0_g1	11	2.70584	14	2.82576	19	4.49719	9	1.81697	11	3.81159	13	2.37193	48	12.0157	16	8.06031	14	2.87025
TRINITY_DN9153_c0_g1	146	5.92028	174	5.83614	163	6.40365	174	5.69567	145	5.50126	209	4.35891	159	5.51919	82	3.60735	118	3.66887
TRINITY_DN13799_c0_g1	1247	29.6313	897	29.2291	778.999	32.7527	327	10.7802	837	18.6999	516	6.09922	702	15.2931	498	13.1113	1052	20.9212
TRINITY_DN11544_c0_g1	12	0.679284	22	1.0509	35	1.96078	10	0.462956	12	0.643843	19	0.560142	45	2.18704	13	0.796166	4	0.176135
TRINITY_DN11544_c0_g2	1	1.91197	1	1.69897	2	3.9121	1	1.7932	1	2.21738	0	0	1	1.58371	0	0	0	0
TRINITY_DN12608_c0_g1	677	23.3312	812	23.3179	1360	46.1575	515	14.5094	569	18.5366	1170	20.984	1241	36.8366	876	32.6569	1131	30.5211
TRINITY_DN17601_c0_g1	0	0	2	0.986238	0	0	0	0	0	0	0	0	0	0	5	3.35296	0	0
TRINITY_DN8554_c0_g1	573	43.8122	637	40.46	733	54.9386	395	24.7096	317	23.0287	576	22.9522	837	54.7899	502	41.5331	544	32.1658
TRINITY_DN12465_c0_g1	323	13.9172	763	27.4205	919	39.0227	144	5.08542	98	4.00548	171	3.81196	488	17.9829	191	8.86557	156	5.22193
TRINITY_DN20830_c0_g1	0	0	0	0	0	0	0	0	0	0	0	0	0	0	0	0	3	3.31831
TRINITY_DN11605_c0_g1	81	3.23199	92.9999	3.0744	182	7.15818	51	1.66046	102	3.82789	115	2.39358	249	8.52358	64	2.75745	59	1.84433
TRINITY_DN15875_c0_g1	0	0	0	0	0	0	0	0	0	0	0	0	0	0	0	0	2	3.4816
TRINITY_DN12476_c0_g2	521	10.5011	841	14.1353	537	10.6246	157	2.57066	419	7.9245	483	5.01046	298	5.16746	384	8.31685	580	9.1672
TRINITY_DN9727_c0_g1	73	4.03319	76	3.44416	97	5.28673	69	3.08491	369	19.3222	197	5.66663	160	7.51549	61	3.66091	48	2.07194
TRINITY_DN21124_c0_g1	0	0	0	0	0	0	0	0	0	0	4	0.798815	3	0.933836	2	0.822839	1	0.269016
TRINITY_DN10955_c0_g1	9389	543.546	11834	578.874	9620	559.146	32212	1571.89	22417	1250.26	35863	1089.2	5776.99	305.895	5144	326.106	8537	387.462
TRINITY_DN7959_c0_g1	37	16.416	15	5.40584	11	4.61794	8	2.93689	4	1.77244	5	1.17514	5	1.81196	4	1.93445	2	0.620001
TRINITY_DN21718_c0_g1	3	8.32	0	0	0	0	0	0	0	0	0	0	0	0	0	0	0	0
TRINITY_DN11268_c0_g1	36	6.04317	48	4.52553	27	2.81128	29	2.9116	11	1.11789	14	0.825786	17	1.99212	4	0.640913	8	0.653494
TRINITY_DN22778_c0_g1	0	0	0	0	0	0	0	0	0	0	0	0	0	0	0	0	5	2.5327
TRINITY_DN6905_c0_g1	21	1.84738	36	2.62858	58	4.99514	17	1.22379	10	0.836975	17	0.779679	105	7.89488	33	3.1415	17	1.15256
TRINITY_DN24652_c0_g1	0	0	0	0	0	0	0	0	0	0	0	0	0	0	0	0	3	5.82204
TRINITY_DN15931_c0_g1	0	0	0	0	0	0	0	0	0	0	0	0	0	0	0	0	5	7.4929
TRINITY_DN24304_c0_g1	0	0	0	0	0	0	0	0	0	0	0	0	0	0	0	0	3	4.53937
TRINITY_DN25427_c0_g1	0	0	0	0	0	0	0	0	0	0	0	0	0	0	0	0	3	4.45215
TRINITY_DN20634_c0_g1	1	3.36343	0	0	0	0	2	6.09547	0	0	0	0	0	0	0	0	0	0
TRINITY_DN14359_c0_g1	0	0	0	0	0	0	0	0	0	0	0	0	0	0	0	0	2	2.88354
TRINITY_DN274_c0_g1	9	2.51713	7	1.68196	6	1.64769	7	1.60789	1	0.272432	2	0.293528	13	3.22376	3	0.909275	5	1.0201
TRINITY_DN21263_c0_g1	0	0	0	0	1	2.04913	0	0	0	0	0	0	3	4.96707	0	0	0	0
TRINITY_DN25347_c0_g1	0	0	0	0	0	0	0	0	0	0	0	0	0	0	0	0	3	4.90987
TRINITY_DN11902_c0_g1	7252	389.418	9353	418.752	9315	491.934	5163	228.04	7367.99	376.055	7087	199.611	8595	397.569	3701	215.506	2459	103.016
TRINITY_DN7887_c0_g1	82	2.56271	113	2.94341	562	17.3034	108	2.75916	110	3.24848	99	1.61001	578	15.5659	186	6.28798	84	2.05766
TRINITY_DN759_c0_g1	10	1.39393	26	2.99684	26	3.52807	42	4.79539	14	1.86834	25	1.81994	82	9.69811	26	3.92335	18	1.90481
TRINITY_DN25409_c0_g1	0	0	0	0	0	0	0	0	0	0	1	1.58277	0	0	0	0	2	3.44554
TRINITY_DN27091_c0_g1	0	0	0	0	0	0	0	0	0	0	0	0	0	0	0	0	2	3.24035
TRINITY_DN24115_c0_g1	0	0	0	0	1	1.85268	2	3.40141	0	0	1	1.05675	2	3.00758	0	0	0	0
TRINITY_DN6669_c0_g1	0	0	0	0	0	0	0	0	0	0	0	0	0	0	0	0	20	5.60814
TRINITY_DN21657_c0_g1	101	6.29247	170	8.80736	151	9.23615	82	4.17858	129	7.62283	68	2.20681	221	11.8116	82	5.5274	109	5.27359
TRINITY_DN22614_c0_g1	1	2.01746	0	0	0	0	0	0	0	0	0	0	0	0	0	0	4	4.94222
TRINITY_DN14631_c0_g1	0	0	0	0	0	0	3	3.67398	0	0	0	0	4	4.39069	0	0	1	0.833253
TRINITY_DN14295_c1_g1	1	2.48752	0	0	0	0	0.999999	2.32363	1.40209	3.98138	1	1.41475	3	5.11162	0	0	0	0
TRINITY_DN14657_c0_g1	0	0	1	1.76237	0	0	0	0	0	0	0	0	0	0	0	0	3	3.64221
TRINITY_DN10342_c0_g1	1440	277.803	1889	302.567	2774	490.968	1456	211.492	1200	207.475	1548	143.821	4141.99	626.207	1589	323.467	1377	188.273
TRINITY_DN21519_c0_g1	3	1.12283	2	0.609345	0	0	6	1.84999	0	0	7	1.38094	6	1.84639	1	0.406459	1	0.26613
TRINITY_DN14263_c0_g1	32	4.99023	42	5.52987	99	15.078	10	1.2934	6	0.89216	10	0.809989	17	2.25713	20	3.35658	30	3.55385
TRINITY_DN16006_c0_g1	0	0	0	0	0	0	0	0	0	0	0	0	0	0	2	5.0896	0	0
TRINITY_DN11726_c0_g1	730.001	37.5079	550.001	23.3543	925.999	47.3156	727	30.2706	417	20.531	762	20.354	1098	49.383	422.001	23.7422	357	14.0124
TRINITY_DN11190_c0_g1	373	28.7557	619	39.7478	1176	88.9956	398	25.0102	279	20.4007	411	16.5045	1554	102.493	478	39.794	452	26.8602
TRINITY_DN14685_c0_g1	0	0	0	0	0	0	0	0	0	0	0	0	0	0	0	0	5	7.42025
TRINITY_DN27691_c0_g1	2	2.26971	0	0	2	2.23161	0	0	0	0	0	0	0	0	0	0	0	0
TRINITY_DN22561_c0_g1	0	0	0	0	0	0	0	0	0	0	0	0	0	0	0	0	5	9.70341
TRINITY_DN8077_c0_g1	939	35.4512	1260	39.582	2057	76.5764	718	22.026	310	11.0714	802	15.7375	1375	44.7116	521	21.2983	390	11.5025
TRINITY_DN27363_c0_g1	0	0	0	0	0	0	0	0	0	0	0	0	0	0	0	0	3	4.53937
TRINITY_DN4368_c0_g2	0	0	0	0	0	0	0	0	0	0	0	0	0	0	0	0	2	4.11054
TRINITY_DN4368_c0_g1	1	2.1515	0	0	0	0	0	0	0	0	0	0	0	0	0	0	1	1.31468
TRINITY_DN22802_c0_g1	0	0	0	0	0	0	0	0	2	6.24302	0	0	0	0	0	0	0	0
TRINITY_DN23062_c0_g1	0	0	0	0	0	0	2	4.35107	0	0	0	0	0	0	0	0	0	0
TRINITY_DN15014_c0_g1	0	0	0	0	0	0	0	0	0	0	0	0	0	0	0	0	2	3.14593
TRINITY_DN14737_c0_g1	0	0	0	0	0	0	0	0	0	0	0	0	0	0	0	0	2	3.75417
TRINITY_DN13569_c0_g1	20199	406.137	28148	466.215	20588	406.587	19916	319.724	7524.99	139.867	36603	377.354	13693	242.793	21301	453.401	44590	688.948
TRINITY_DN14057_c3_g9	0	0	0	0	0	0	0	0	0	0	0	0	0	0	0	0	3	5.22241
TRINITY_DN14057_c3_g8	258	8.4327	365	9.94027	462	14.9028	106	2.83139	118	3.64771	108	1.84082	359	10.1331	184	6.50068	211	5.3989
TRINITY_DN14057_c3_g7	2039	66.2696	2264	61.3226	2416	77.3471	1132	30.076	1348	41.4052	2351	39.7627	3013	84.3681	1698	59.6969	1373	34.9633
TRINITY_DN14057_c3_g6	784.921	36.2048	1152	43.1204	1658	65.5624	869	24.0805	623	29.5142	1023.88	19.9598	2272	82.8183	916	32.1897	511.857	15.8773
TRINITY_DN14057_c3_g5	39	1.35454	53	1.53384	60	2.05845	73	2.07968	59	1.95018	68	1.23812	116	3.47643	58	2.17911	92	2.5019
TRINITY_DN14057_c3_g4	0	0	0	0	1	0.831253	0	0	0	0	1	0.481191	5	3.51735	0	0	0	0
TRINITY_DN14057_c3_g3	569	21.7001	722	22.9099	1203	45.1222	451	14.0679	515	18.576	640	12.6893	1956	64.204	1117	46.0411	986	29.3717
TRINITY_DN19290_c0_g1	0	0	0	0	0	0	0	0	0	0	0	0	0	0	1	2.16078	6	6.58277
TRINITY_DN14057_c3_g1	1046	28.4339	1335	30.2064	1704	45.699	641	14.1837	810	20.5891	1125	15.8913	1829	42.8912	1076	31.6548	577	12.3852
TRINITY_DN14637_c0_g1	0	0	2	2.63291	0	0	0	0	0	0	1	0.874991	0	0	0	0	0	0
TRINITY_DN18302_c0_g1	3	9.14422	0	0	0	0	0	0	0	0	0	0	0	0	0	0	0	0
TRINITY_DN17698_c0_g1	0	0	0	0	0	0	0	0	0	0	1	0.77714	4	4.42386	0	0	0	0
TRINITY_DN14719_c0_g1	1	1.61619	0	0	1	1.63642	0	0	0	0	1	0.941736	0	0	0	0	0	0
TRINITY_DN16021_c0_g1	0	0	0	0	0	0	0	0	0	0	0	0	0	0	0	0	3	3.48859
TRINITY_DN15605_c0_g1	2	4.51478	0	0	0	0	0	0	0	0	0	0	0	0	0	0	0	0
TRINITY_DN8688_c0_g1	0	0	0	0	0	0	0	0	0	0	0	0	0	0	0	0	8	3.90497
TRINITY_DN10973_c0_g1	19	2.38082	38	3.8848	76	9.15224	37	5.52369	27.9999	3.90805	18	1.16024	36	7.63665	12	1.60401	19	2.3642
TRINITY_DN14277_c1_g8	289	15.5334	381	17.3275	603	32.3071	400	17.7383	517	28.3788	831	24.5017	847	41.4335	750	45.6335	830	33.9482
TRINITY_DN14277_c1_g5	88	6.70387	87	5.50576	64	4.77936	200	12.4652	80	5.79012	111	4.4068	58	3.78288	28	2.30808	47	2.76906
TRINITY_DN14277_c1_g4	2752	166.925	3791	197.067	3869	222.664	1883	89.7186	1466	73.5682	3137	92.2598	3042	118.711	2573	190.834	3539	248.223
TRINITY_DN14277_c1_g7	235	21.8139	362	27.8805	130	11.8075	347	26.3606	281	24.8314	300	14.5207	148	11.7339	61	6.12768	108	7.71517
TRINITY_DN14277_c1_g6	391	26.4006	314	17.6017	304	20.0281	556	30.4809	496	31.5817	640	22.3663	465	26.8832	221	16.142	306	15.9781
TRINITY_DN14277_c1_g1	495	17.1679	261	6.81984	184	4.30024	191	3.84809	306	11.1162	330.999	3.91472	378	7.52897	540.999	13.0941	1071	19.5539
TRINITY_DN14277_c1_g3	29213	992.299	52530	1290.08	24595	836.832	8209	259.202	7011	296.323	9824	203.643	15412	652.596	14182	563.644	17286	510.259
TRINITY_DN14277_c1_g2	1356	23.4478	1366	19.916	1016	18.4585	3149	40.4781	1024	15.7453	1695	13.9233	1050	16.0371	594	10.8084	1112	14.4979
TRINITY_DN10973_c0_g2	0	0	0	0	1	3.04925	0	0	0	0	0	0	0	0	0	0	2	3.63323
TRINITY_DN25790_c0_g1	0	0	0	0	0	0	0	0	0	0	0	0	0	0	0	0	2	2.53723
TRINITY_DN8561_c0_g1	18	2.8362	16	2.08189	24	3.67395	104	13.3772	145	21.848	440	36.2291	200	26.6481	96	16.3547	125	14.8739
TRINITY_DN17436_c0_g1	0	0	0	0	0	0	0	0	0	0	1	1.29551	0	0	1	2.70567	0	0
TRINITY_DN6664_c0_g1	0	0	0	0	0	0	0	0	0	0	0	0	0	0	0	0	8	9.14745
TRINITY_DN7434_c0_g1	21	2.42941	6	0.574953	12	1.35493	11	1.04188	11	1.21481	15	0.905531	15	1.47731	3	0.375641	11	0.97278
TRINITY_DN26862_c0_g1	0	0	0	0	0	0	0	0	0	0	0	0	0	0	0	0	2	3.30677
TRINITY_DN15950_c0_g1	2	0.297438	2	0.245782	17	2.45863	2	0.243672	1	0.142544	4	0.310769	0	0	4	0.644018	1	0.112598
TRINITY_DN7318_c0_g1	3	0.512244	12	1.7296	7	1.205	4	0.515114	0	0	2	0.198221	3	0.478844	0	0	0	0
TRINITY_DN19564_c0_g1	0	0	0	0	0	0	0	0	0	0	0	0	0	0	0	0	4	7.42694
TRINITY_DN10621_c0_g1	82	3.98099	102	4.12205	194	9.24862	90.0001	3.56495	58.9999	2.7021	122	3.06791	493	20.5332	249	13.0648	175	6.61754
TRINITY_DN10696_c0_g1	405	14.7593	676	20.5748	1269	45.723	533.999	15.9437	568	19.6016	933	17.7323	1375	43.2803	1058	41.7953	712	20.3664
TRINITY_DN14817_c0_g1	0	0	0	0	4	3.47239	0	0	0	0	1	0.50305	2	1.4661	0	0	0	0
TRINITY_DN17796_c0_g1	0	0	0	0	0	0	0	0	0	0	0	0	1	2.02571	2	5.85566	0	0
TRINITY_DN7733_c0_g1	165	8.13426	254	10.4227	494	23.9442	211	8.50605	241	11.2512	360	9.24071	870	36.8624	392	20.9068	325	12.4905
TRINITY_DN15180_c0_g1	3	3.27121	2	1.8525	3	3.20537	2	1.95977	1	1.21807	4	2.48211	1	0.892935	0	0	1	0.692927
TRINITY_DN3658_c0_g1	1	1.49351	1	1.30542	0	0	1	1.38454	1	1.71853	3	2.60378	0	0	2	3.60028	3	2.7775
TRINITY_DN4447_c0_g1	2	1.35145	4	2.21361	0	0	0	0	0	0	1	0.367621	2	1.09653	0	0	0	0
TRINITY_DN4447_c0_g2	0	0	0	0	0	0	0	0	2	0.961559	1	0.254131	2	0.779417	0	0	1	0.331455
TRINITY_DN20258_c0_g1	1	1.30542	0	0	2	2.59743	3	3.5873	0	0	3	2.26016	0	0	0	0	0	0
TRINITY_DN15891_c0_g1	0	0	0	0	0	0	0	0	0	0	0	0	0	0	0	0	3	3.54895
TRINITY_DN10586_c0_g1	25	1.74145	30	1.73682	59	4.03165	47	2.6782	52	3.43864	45	1.63323	154	9.19284	48	3.61777	67	3.6164
TRINITY_DN7760_c0_g1	0	0	0	0	0	0	0	0	0	0	0	0	0	0	0	0	7	3.79425
TRINITY_DN15130_c0_g1	2	6.4334	0	0	0	0	0	0	0	0	0	0	0	0	0	0	0	0
TRINITY_DN4418_c0_g1	0	0	0	0	0	0	0	0	0	0	1	0.29608	0	0	3	1.82663	7	4.54903
TRINITY_DN7623_c0_g1	0	0	0	0	4	12.8164	0	0	0	0	0	0	0	0	0	0	0	0
TRINITY_DN7623_c0_g2	226	20.9273	242	18.5887	367	33.2102	379	28.7045	581	51.2277	454	21.9295	1484	117.399	390	39.0952	392	27.8444
TRINITY_DN16851_c0_g1	6	5.15634	2	1.42952	3	2.47865	1	0.750936	0	0	0	0	0	0	1	0.986008	0	0
TRINITY_DN16713_c0_g1	0	0	0	0	0	0	2	4.23383	0	0	0	0	0	0	0	0	0	0
TRINITY_DN6789_c0_g1	22	4.21944	45	7.10959	17	3.15587	137	21.5434	433	80.0196	315	31.6071	66	10.6609	71	14.7469	190	27.2503
TRINITY_DN1636_c0_g1	0	0	0	0	0	0	0	0	4	9.93833	0	0	0	0	0	0	0	0
TRINITY_DN1636_c0_g2	0	0	0	0	0	0	0	0	1	3.06741	0	0	0	0	0	0	0	0
TRINITY_DN15082_c0_g1	2	1.17292	0	0	0	0	1	0.492972	0	0	1	0.31547	3	1.42805	1	0.648794	0	0
TRINITY_DN8237_c0_g2	0	0	0	0	0	0	0	0	3	2.51029	0	0	1	0.635968	1	0.889267	3	1.54131
TRINITY_DN8237_c0_g3	0	0	0	0	0	0	0	0	1	2.41997	1	1.20887	0	0	0	0	0	0
TRINITY_DN10229_c0_g1	23	1.29256	30	1.4026	22	1.24596	20	0.919217	9	0.47937	29	0.861647	15	0.73043	9	0.547209	19	0.851876
TRINITY_DN8237_c0_g1	0	0	0	0	0	0	0	0	11	1.35817	7	0.463245	14	1.53607	4	0.54344	0	0
TRINITY_DN10454_c0_g1	162	9.41683	173	8.42691	246	14.0824	62	2.92209	28	1.46001	67.9999	2.0321	121	5.77921	55	3.33293	20	0.875198
TRINITY_DN20568_c0_g1	0	0	0	0	0	0	0	0	0	0	0	0	0	0	0	0	2	2.80335
TRINITY_DN2957_c0_g1	2	1.39131	0	0	0	0	0	0	0	0	0	0	0	0	0	0	5	2.31279
TRINITY_DN27796_c0_g1	0	0	0	0	0	0	0	0	3	5.8953	0	0	0	0	0	0	0	0
TRINITY_DN23381_c0_g1	0	0	0	0	0	0	0	0	0	0	0	0	0	0	0	0	9	5.41159
TRINITY_DN24404_c0_g1	1	0.750159	2	1.23626	1	0.715437	8	5.16616	1	0.797642	2	0.824326	4	2.4376	2	1.69802	1	0.494877
TRINITY_DN26228_c0_g1	2	4.51478	0	0	1	2.32	2	4.23383	0	0	0	0	0	0	0	0	0	0
TRINITY_DN25401_c0_g1	0	0	0	0	0	0	0	0	0	0	0	0	0	0	0	0	7	7.61809
TRINITY_DN13224_c0_g1	1128	44.3797	1531	35.811	2391	77.7678	1147	25.5368	1390	26.6616	1875	19.6812	3575	122.939	1503	55.4041	1296	28.2876
TRINITY_DN24834_c0_g1	0	0	0	0	0	0	0	0	0	0	0	0	0	0	1	2.5448	5	6.45636
TRINITY_DN17381_c0_g1	0	0	0	0	0	0	0	0	0	0	0	0	0	0	0	0	4	5.55516
TRINITY_DN14175_c2_g3	4	1.47568	0	0	2	0.672544	0	0	54	19.2483	9	1.7288	3	0.897162	0	0	3	0.815893
TRINITY_DN14175_c2_g2	0	0	0	0	1	2.70637	2	4.82027	1.00384	2.99856	2.17883	3.24482	1.17027	2.53	2	6.11009	1	1.57297
TRINITY_DN14175_c2_g5	2	3.7906	2	3.36694	2	3.8767	3	4.12672	4	5.80469	5	2.56494	6.00895	4.30311	0	0	2.05944	2.39485
TRINITY_DN2574_c0_g1	3	1.5983	2	0.866062	1	0.503224	4	1.77886	4	2.16619	2	0.56943	4	1.73201	1	0.585546	2	0.729771
TRINITY_DN14175_c2_g6	2	4.73691	0	0	0	0	0	0	3	8.58983	0	0	5.26023	2.60454	0	0	0	0
TRINITY_DN26709_c0_g1	0	0	0	0	0	0	0	0	4	9.43249	0	0	0	0	0	0	0	0
TRINITY_DN2622_c0_g1	24	4.03739	29	4.24123	21	3.61302	15	2.17484	5	0.780091	8	0.679461	88	13.3589	16	3.00872	12	1.63534
TRINITY_DN13892_c5_g1	3	1.1936	3	0.970716	6	2.26481	4	1.31275	4	1.57676	5	1.05018	3	0.978994	3	1.29758	1	0.281198
TRINITY_DN22123_c0_g1	0	0	0	0	1	1.03144	1	0.945011	0	0	1	0.598983	1	0.863704	0	0	1	0.672795
TRINITY_DN25456_c0_g1	3	9.14422	0	0	0	0	1	2.79591	0	0	0	0	0	0	0	0	0	0
TRINITY_DN27435_c0_g1	0	0	1	1.96928	0	0	1	2.07783	0	0	0	0	0	0	0	0	0	0
TRINITY_DN23181_c0_g1	3	0.224826	2	0.124523	4	0.293895	5	0.306557	5	0.355947	7	0.273378	13	0.834253	9	0.729816	12	0.695757
TRINITY_DN19647_c0_g1	1	0.713128	0	0	0	0	1	0.610432	0	0	2	0.779704	2	1.1577	1	0.8027	0	0
TRINITY_DN13530_c0_g1	768	24.0488	753	19.7411	631.999	21.3505	72	1.82666	39.9999	1.26414	95	1.52448	126	3.42823	44	2.41525	40	1.91685
TRINITY_DN16399_c0_g1	0	0	1	1.03512	3	3.5794	4	4.38964	1	1.36348	0	0	0	0	1	1.43405	1	0.760205
TRINITY_DN16538_c0_g1	0	0	0	0	0	0	0	0	1	2.64145	0	0	2	3.79512	1	2.75379	0	0
TRINITY_DN17661_c0_g1	0	0	0	0	1	1.0761	2	1.9741	1	1.22715	0	0	0	0	0	0	0	0
TRINITY_DN9431_c0_g1	542	69.6775	744	79.1306	1038	130.001	375	39.0359	586	71.3911	627	41.766	3321	361.432	917	126.424	750	72.8803
TRINITY_DN4336_c0_g1	331	30.0528	502	37.8226	620	55.0928	111	8.24752	105	9.07338	136	6.43822	668	51.8175	241	23.6793	117	8.18011
TRINITY_DN22745_c0_g1	0	0	0	0	0	0	5	4.82884	0	0	0	0	0	0	0	0	0	0
TRINITY_DN25547_c0_g1	5	0.441726	13	0.953224	30	2.59459	4	0.28918	7	0.588404	13	0.598772	37	2.7937	15	1.43404	6	0.408474
TRINITY_DN11164_c0_g1	350	28.0146	264	18.655	181	15.0766	1368	90.3003	91	7.55941	739	32.7187	570	39.3565	257	23.2212	213	13.9592
TRINITY_DN21199_c0_g1	1	1.94588	3	5.19112	0	0	0	0	0	0	0	0	0	0	0	0	0	0
TRINITY_DN25763_c0_g1	1	0.448329	0	0	1	0.424132	3	1.11331	5	2.24069	7	1.66309	4	1.46425	1	0.488846	0	0
TRINITY_DN9317_c0_g1	0	0	0	0	0	0	0	0	0	0	0	0	0	0	0	0	36	5.57738
TRINITY_DN26479_c0_g1	2	6.16219	0	0	0	0	0	0	0	0	0	0	0	0	0	0	0	0
TRINITY_DN25991_c0_g1	0	0	0	0	0	0	0	0	0	0	0	0	0	0	0	0	3	4.28461
TRINITY_DN24215_c0_g1	0	0	0	0	0	0	0	0	2	3.01948	0	0	0	0	1	1.58494	0	0
TRINITY_DN14127_c0_g1	999.999	8.01031	1364	9.11246	697	5.49841	2222	14.6572	631	4.77183	1310	5.46068	1244	8.61996	976	8.46764	2136	13.7486
TRINITY_DN9907_c0_g1	17	0.610191	13	0.388776	39	1.44786	15	0.505474	26	0.934566	19	0.383294	103	3.30575	63	2.55814	42	1.25224
TRINITY_DN3073_c0_g1	0	0	0	0	0	0	0	0	0	0	0	0	0	0	0	0	3	3.97987
TRINITY_DN27650_c0_g1	0	0	0	0	0	0	0	0	0	0	1	1.45101	0	0	0	0	2	3.11541
TRINITY_DN11693_c0_g1	240	20.0103	294	19.5527	350	27.5714	723	46.2168	490	36.4876	526	21.783	1114	75.8497	408	35.4532	559	36.957
TRINITY_DN2708_c0_g1	1	2.46322	0	0	0	0	0	0	0	0	0	0	0	0	0	0	2	2.99716
TRINITY_DN15951_c0_g1	360	32.9018	483	36.6299	564	50.4445	333	24.9063	119	10.3519	476	22.6831	220	17.1769	124	12.2641	151	10.6251
TRINITY_DN14711_c0_g1	2	5.83733	0	0	0	0	0	0	0	0	0	0	0	0	0	0	0	0
TRINITY_DN6954_c0_g1	9	0.53861	15	0.759813	14	0.822796	19	0.947431	13	0.737695	17	0.52991	21	1.07851	14	0.906483	24	1.15182
TRINITY_DN7952_c0_g1	1159	29.7958	2087	44.7361	1752	44.4	2747	57.7235	2090	50.7377	3404	45.5359	4303	95.4006	2874	79.9487	1838	37.0978
TRINITY_DN15772_c0_g1	0	0	0	0	0	0	0	0	0	0	0	0	0	0	0	0	2	4.06252
TRINITY_DN18155_c0_g1	1	2.03568	0	0	0	0	0	0	0	0	1	1.17917	0	0	0	0	0	0
TRINITY_DN15829_c0_g1	0	0	0	0	0	0	0	0	0	0	0	0	0	0	2	5.22176	0	0
TRINITY_DN14746_c0_g1	0	0	0	0	0	0	0	0	0	0	0	0	0	0	0	0	3	4.86053
TRINITY_DN19933_c0_g1	2	3.10598	0	0	1	1.56779	1	1.44391	1	1.79193	0	0	0	0	0	0	0	0
TRINITY_DN22952_c0_g1	1	1.15034	1	0.981849	1	1.13225	0	0	1	1.29263	0	0	0	0	0	0	0	0
TRINITY_DN108_c0_g1	679	35.1732	1417	61.0862	841	42.821	301	12.7509	72	3.53306	391	10.5469	561	24.9677	401	22.473	519	20.9434
TRINITY_DN5135_c0_g1	1	0.678972	0	0	2	1.28878	0	0	4	2.84708	0	0	0	0	1	0.760555	0	0
TRINITY_DN10900_c0_g1	258	10.3029	285	9.48091	371	14.5916	300	9.80157	138	5.20012	463	9.62245	756	26	333	14.3799	253	7.87153
TRINITY_DN16241_c0_g1	2	5.48997	0	0	0	0	0	0	0	0	0	0	0	0	0	0	0	0
TRINITY_DN6962_c0_g1	17	2.78168	12	1.59536	8	1.2744	4	0.527812	3	0.463733	2	0.168319	4	0.564882	0	0	3	0.364459
TRINITY_DN24450_c0_g1	0	0	2	2.18503	6	7.55339	1	1.15863	0	0	0	0	1	1.04228	0	0	0	0
TRINITY_DN15725_c0_g1	0	0	0	0	0	0	0	0	1	0.879084	5	2.26288	0	0	3	2.79857	0	0
TRINITY_DN27008_c0_g1	0	0	0	0	1	2.38689	0	0	0	0	0	0	0	0	2	5.55582	0	0
TRINITY_DN26238_c0_g1	0	0	0	0	0	0	0	0	0	0	0	0	0	0	1	3.0038	2	3.08527
TRINITY_DN9342_c0_g1	443	12.2816	717	16.5718	674	18.4158	443	10.039	481	12.5954	587	8.46729	1038	24.8101	573	17.1833	288	6.26485
TRINITY_DN20565_c0_g1	0	0	0	0	0	0	0	0	8	11.3382	0	0	0	0	0	0	0	0
TRINITY_DN11290_c0_g1	11	1.43338	5	0.598885	12	1.50845	6	0.681718	6	0.78028	33	2.38927	16	1.91129	5	0.784384	10	1.09835
TRINITY_DN16084_c0_g1	14	2.58936	8	1.21946	3	0.53746	1	0.151624	0	0	0	0	0	0	0	0	0	0
TRINITY_DN20702_c0_g1	0	0	2	2.82043	3	4.86719	0	0	0	0	0	0	0	0	0	0	0	0
TRINITY_DN11075_c0_g1	745	62.9613	778	54.5432	1056	87.4048	241	16.6085	114	8.96891	336	14.7783	583	41.9371	156	14.1957	136	8.81441
TRINITY_DN13982_c0_g1	226	13.18	298	11.8093	130	6.05634	11	0.324282	45	2.13167	16	0.512246	19	0.79444	14	0.802637	30.9999	1.18002
TRINITY_DN24927_c0_g1	0	0	0	0	0	0	0	0	0	0	0	0	0	0	0	0	5	7.14102
TRINITY_DN10970_c0_g1	26	0.796568	26	0.663941	50	1.50115	38	0.939656	103	2.98165	85	1.34511	240	6.3143	122	4.01548	82	1.95226
TRINITY_DN11688_c0_g1	32	1.78544	33	1.52713	29	1.58972	10	0.456309	11	0.581667	17	0.482494	129	6.13216	46	2.77678	42	1.80478
TRINITY_DN20652_c0_g1	0	0	0	0	0	0	0	0	0	0	0	0	0	0	2	5.90633	0	0
TRINITY_DN24385_c0_g1	0	0	0	0	0	0	0	0	0	0	0	0	0	0	2	6.91128	0	0
TRINITY_DN11220_c0_g1	325	7.98836	365	7.46927	466	11.2927	282	5.61927	221	5.12378	527	6.75084	480	10.2102	275	7.33345	171	3.31274
TRINITY_DN9638_c0_g1	239	16.2261	281	15.7441	153	10.1759	519	28.9525	273	17.6369	621	22.0445	471	27.5555	191	14.1161	158	8.29186
TRINITY_DN505_c0_g1	5	0.640979	8	0.848725	10	1.24948	0	0	0	0	4	0.267699	4	0.43577	7	0.97136	5	0.4882
TRINITY_DN1855_c0_g2	6	3.32995	4	1.80587	2	1.04869	8	3.71649	2	1.13363	6	1.78434	4	1.80302	5	3.05788	3	1.1352
TRINITY_DN1855_c0_g1	3	6.64402	0	0	0	0	4	8.31134	0	0	1	1.27324	2	3.65756	1	2.65824	1	1.35122
TRINITY_DN11996_c0_g1	87.9999	1.7782	81	1.35221	53.0001	1.11518	68.9999	1.13441	85	1.75154	188	2.09767	65	1.2085	51.9999	1.32709	24	0.380169
TRINITY_DN21678_c0_g1	3	0.842829	2	0.459909	1	0.269325	12	2.76889	2	0.547408	5	0.737162	0	0	1	0.304462	4	0.819475
TRINITY_DN3639_c0_g1	2	1.84273	0	0	0	0	0	0	0	0	1	0.516215	0	0	1	1.06502	20	13.0937
TRINITY_DN21063_c0_g1	0	0	2	3.72218	0	0	0	0	0	0	0	0	0	0	0	0	0	0
TRINITY_DN19321_c0_g1	2	6.09615	0	0	0	0	0	0	0	0	0	0	0	0	0	0	0	0
TRINITY_DN21703_c0_g1	0	0	0	0	0	0	0	0	0	0	0	0	0	0	2	6.00761	0	0
TRINITY_DN17462_c0_g1	0	0	0	0	0	0	0	0	0	0	0	0	0	0	0	0	2	3.71347
TRINITY_DN27279_c0_g1	0	0	0	0	0	0	0	0	0	0	0	0	0	0	0	0	2	3.59403
TRINITY_DN24624_c0_g1	2	4.97504	0	0	0	0	0	0	0	0	0	0	0	0	0	0	0	0
TRINITY_DN7917_c0_g2	0	0	0	0	0	0	1	1.5459	1	1.91556	2	1.93072	1	1.36965	0	0	0	0
TRINITY_DN7917_c0_g1	0	0	0	0	0	0	0	0	2	5.01316	0	0	0	0	0	0	1	1.32662
TRINITY_DN4098_c0_g1	0	0	0	0	0	0	1	2.00031	0	0	0	0	0	0	0	0	1	1.30291
TRINITY_DN4098_c0_g2	6	1.82994	4	0.996944	4	1.16665	5	1.25318	5	1.4903	6	0.961233	4	1.01154	2	0.661263	10	2.20936
TRINITY_DN3105_c0_g1	0	0	2	1.75062	4	4.03995	4	3.69964	0	0	1	0.586555	0	0	1	1.21232	0	0
TRINITY_DN25712_c0_g1	2	0.422655	6	1.04302	6	1.22468	0	0	3	0.612346	2	0.221266	0	0	0	0	0	0
TRINITY_DN26000_c0_g1	0	0	3	1.75709	2	1.3564	0	0	1	0.75272	2	0.779704	0	0	1	0.8027	0	0
TRINITY_DN12699_c0_g1	1969	46.7041	2810	55.5555	5906	138.209	7675.01	148.694	1927	43.2028	8601.01	106.188	9105	186.598	4856	124.722	2511	46.7893
TRINITY_DN13091_c0_g1	12461	146.771	11342	111.468	11989	139.544	37407	359.391	20791	230.19	27365	167.395	10170	103.739	8694.99	110.909	13107	121.773
TRINITY_DN2074_c0_g1	0	0	0	0	0	0	0	0	0	0	0	0	0	0	0	0	3	5.57021
TRINITY_DN26235_c0_g1	2	2.74859	0	0	0	0	0	0	0	0	1	0.795491	0	0	0	0	1	0.856421
TRINITY_DN18048_c0_g1	0	0	0	0	0	0	0	0	0	0	0	0	0	0	0	0	3	5.27752
TRINITY_DN15095_c0_g1	0	0	1	0.953355	0	0	1	1.00908	2	2.50956	1	0.638693	0	0	1	1.32142	0	0
TRINITY_DN14087_c2_g3	2	2.5008	0	0	2	2.47921	2	2.28147	8	11.3382	2	1.43925	7	7.19068	2	2.97972	4	3.1404
TRINITY_DN14087_c2_g2	1118	22.5132	1315	22.0736	1347	26.6664	2724	44.9356	488	9.28549	1339	13.9721	1053	18.2249	985	21.4224	1010	16.0427
TRINITY_DN14087_c2_g1	561	137.067	908	223.476	499	126.462	825.999	189.701	1633	408.505	1794	264.907	759	179.031	281	85.8416	544	132.108
TRINITY_DN4626_c0_g1	0	0	0	0	0	0	5	6.0265	14	20.9683	5	3.7963	2	2.16277	0	0	2	1.64416
TRINITY_DN20608_c0_g1	0	0	0	0	0	0	0	0	0	0	0	0	0	0	0	0	2	3.27325
TRINITY_DN6653_c0_g1	14	0.827697	21	1.04029	39	2.28118	8	0.389702	28	1.58121	19	0.589413	26	1.32896	11	0.708828	6	0.273519
TRINITY_DN17650_c0_g1	0	0	0	0	0	0	0	0	0	0	0	0	0	0	0	0	2	2.36596
TRINITY_DN12942_c0_g1	40	2.11898	29	1.2969	17	0.883615	92	3.90977	19	0.937334	30	0.815683	67	3.03608	12	0.687776	26	1.05742
TRINITY_DN250_c0_g1	0	0	1	2.60235	0	0	1	2.74422	1	3.31742	0	0	0	0	0	0	0	0
TRINITY_DN250_c0_g2	4	0.620064	4	0.512142	3	0.451935	10	1.27009	3	0.44608	4	0.323995	10	1.31234	2	0.335658	6	0.702908
TRINITY_DN20090_c0_g1	0	0	0	0	0	0	0	0	0	0	0	0	0	0	2	7.35855	0	0
TRINITY_DN10017_c0_g1	158	12.9342	213	14.4486	162	13.0121	90	5.936	54	4.18195	116	4.8549	116	8.14773	50.9999	4.48016	67	4.17177
TRINITY_DN12852_c0_g1	106	5.02334	82	2.45439	62	2.19315	120	3.52434	155	5.26466	340	6.35692	117	4.19526	46	2.30898	59	1.65899
TRINITY_DN22864_c0_g1	1	2.07318	0	0	0	0	0	0	0	0	0	0	0	0	2	5.00461	0	0
TRINITY_DN18767_c0_g1	0	0	0	0	1	1.14914	1	1.05586	0	0	0	0	2	1.91289	2	2.76296	0	0
TRINITY_DN10518_c0_g2	128	6.27156	138	5.64436	156	7.56256	298	11.907	112	5.18614	206	5.26834	135	5.70711	118	6.26365	324	12.3989
TRINITY_DN10501_c0_g1	1	0.990873	3	2.50319	2	1.92626	15	13.2115	50	54.7032	48	26.8321	5	4.04659	2	2.30898	1	0.635312
TRINITY_DN17922_c0_g1	1	0.647551	1	0.529261	2	1.22697	0	0	0	0	1	0.351	0	0	1	0.722116	1	0.433977
TRINITY_DN17842_c0_g1	0	0	2	2.99733	0	0	0	0	1	1.9651	0	0	0	0	0	0	0	0
TRINITY_DN17321_c0_g1	1	1.43753	1	1.25264	1	1.442	0	0	1	1.64971	1	0.834179	0	0	0	0	1	0.89311
TRINITY_DN8061_c0_g1	0	0	0	0	0	0	0	0	1	3.46348	0	0	0	0	0	0	1	2.00777
TRINITY_DN8061_c0_g2	1	2.71682	0	0	0	0	0	0	0	0	0	0	0	0	1	3.19309	2	3.30677
TRINITY_DN16377_c0_g1	0	0	0	0	0	0	0	0	0	0	0	0	0	0	0	0	4	5.40486
TRINITY_DN27994_c0_g1	0	0	0	0	0	0	0	0	0	0	0	0	0	0	0	0	2	3.24035
TRINITY_DN19704_c0_g1	0	0	0	0	0	0	0	0	2	4.35917	0	0	0	0	0	0	0	0
TRINITY_DN21484_c0_g1	2	1.38451	3	1.70302	1	0.657558	0	0	1	0.72766	0	0	1	0.561814	2	1.55387	4	1.84216
TRINITY_DN8245_c0_g1	145	12.5169	212	15.1465	434	36.6703	86	6.07485	111	9.03585	105	4.70589	470	34.5809	210	19.5824	133	8.80627
TRINITY_DN10293_c0_g1	541	17.512	511	13.7527	277	8.85693	654.001	17.2283	1627	49.6146	1429	24.0161	2101	58.6259	1317	46.1567	2110	53.4654
TRINITY_DN24161_c0_g1	2	4.42935	0	0	0	0	1	2.07783	0	0	0	0	0	0	1	2.65824	0	0
TRINITY_DN27853_c0_g1	2	2.91926	0	0	0	0	0	0	0	0	0	0	0	0	0	0	2	1.81198
TRINITY_DN7763_c0_g1	39	1.64398	21	0.737209	16	0.663646	28	0.965038	32	1.2763	79	1.7335	11	0.398935	5	0.228007	8	0.263458
TRINITY_DN7064_c1_g1	0	0	0	0	0	0	0	0	2	6.02746	0	0	0	0	0	0	0	0
TRINITY_DN20126_c0_g1	0	0	0	0	0	0	2	3.58641	0	0	0	0	0	0	2	4.62991	0	0
TRINITY_DN26066_c0_g1	0	0	2	3.10245	1	1.78709	4	6.5675	0	0	1	1.02191	0	0	0	0	1	1.07962
TRINITY_DN10983_c0_g1	276	6.1534	184	3.42395	287	6.336	129	3.94449	127	3.1731	220	2.55098	272	5.26761	178	4.31206	140	4.11402
TRINITY_DN26745_c0_g1	1	1.76883	0	0	2	3.6062	0	0	0	0	0	0	2	2.93029	0	0	0	0
TRINITY_DN7680_c0_g1	1	1.30542	0	0	4	4.14107	3	3.5873	1	1.48584	0	0	0	0	0	0	0	0
TRINITY_DN23213_c0_g1	0	0	0	0	0	0	0	0	0	0	0	0	0	0	0	0	5	4.841
TRINITY_DN11035_c0_g1	3518	70.47	3353	55.9737	3615	71.5031	2344	38.2094	691	12.9931	1482	15.4105	2950	50.8676	2102	45.5468	2594	40.7934
TRINITY_DN4222_c0_g1	16	6.34587	25	7.88971	24	8.85063	30	9.71506	34	12.7416	11	2.19316	42	13.4102	10	4.2116	22	6.04222
TRINITY_DN21740_c0_g1	7	3.68471	6	2.56666	10	4.97208	2	0.878124	3	1.60305	4	1.12443	6	2.56759	1	0.578121	0	0
TRINITY_DN20099_c0_g1	0	0	0	0	0	0	0	0	0	0	0	0	0	0	1	2.03825	3	3.11403
TRINITY_DN7573_c0_g1	0	0	0	0	0	0	0	0	0	0	0	0	0	0	3	3.90655	4	2.80532
TRINITY_DN10465_c0_g1	212	12.0997	158	7.50171	98	5.49454	41	1.9138	413	22.3431	280	8.32298	226	11.0737	442	27.2931	1175	52.1595
TRINITY_DN5272_c0_g1	9	8.65315	1	0.106854	5	1.50983	1	0.105747	3	1.70738	3	0.860096	22	2.41382	5	2.2745	4	3.54712
TRINITY_DN13463_c0_g1	43052.1	797.326	65694	1016.64	19715	360.33	27062	410.675	7236	126.699	21340	206.213	2666	42.784	2931	58.9921	5618	82.1647
TRINITY_DN27755_c0_g1	0	0	1	1.76237	0	0	0	0	1	2.29727	2	2.2992	1	1.64096	0	0	0	0
TRINITY_DN13848_c2_g1	3067.81	89.1085	3767	92.7791	5059.81	160.928	5890	116.117	3759	121.294	8569	127.909	12503	400.456	6991	188.812	5668.99	103.646
TRINITY_DN13843_c0_g1	214	10.7197	402.299	16.7727	488	24.032	136	5.57091	244	11.5757	485	12.65	985	42.402	694	37.6096	367	14.3283
TRINITY_DN1924_c0_g1	0	0	1	0.591916	0	0	3	1.85163	0	0	4	1.57654	3	1.7542	0	0	0	0
TRINITY_DN23924_c0_g1	2	5.12069	0	0	0	0	0	0	0	0	0	0	0	0	0	0	0	0
TRINITY_DN3550_c0_g1	136	10.3289	214	13.4352	792	58.8641	164	10.0965	220	15.6745	158	6.18121	669	43.3441	288	23.614	217	12.6334
TRINITY_DN17774_c0_g1	0	0	0	0	0	0	0	0	0	0	0	0	0	0	0	0	2	3.4816
TRINITY_DN27060_c0_g1	0	0	0	0	0	0	0	0	4	11.1615	0	0	0	0	0	0	0	0
TRINITY_DN25772_c0_g1	2	3.92679	4	6.98509	0	0	1	1.84258	1	2.27699	4	4.55915	1	1.62631	0	0	5	6.01784
TRINITY_DN1372_c0_g1	72	22.6575	84	21.4319	77	22.1051	87	22.525	83	25.5735	78	12.8766	126	32.2816	37	12.233	91	20.9147
TRINITY_DN7843_c0_g1	30	7.76294	26	5.51546	57	14.173	19	4.03612	1	0.251398	30	4.0706	23	4.317	8	2.24296	7	1.32907
TRINITY_DN5928_c0_g1	104	7.44438	118	7.01906	500	35.1021	171	10.0134	248	16.8562	162	6.04229	707	43.3564	182	14.0962	92	5.09996
TRINITY_DN16505_c0_g1	0	0	0	0	0	0	0	0	0	0	0	0	0	0	0	0	4	2.96526
TRINITY_DN9888_c0_g1	24	1.13853	28	1.10576	41	1.91269	25	0.969769	40	1.79655	32	0.790357	58	2.36541	26	1.33434	31	1.14709
TRINITY_DN15671_c0_g1	1	1.13486	3	2.90232	0	0	1	1.02416	0	0	2	1.2963	1	0.930241	0	0	0	0
TRINITY_DN9747_c0_g1	275	18.1358	335	18.5149	479	30.5651	105	5.34542	95	6.11801	159	5.14849	657	40.1328	225	16.8328	127	6.02978
TRINITY_DN14285_c3_g1	0	0	0	0	0	0	0	0	0	0	0	0	2	2.389	0	0	0	0
TRINITY_DN25455_c0_g1	0	0	0	0	0	0	0	0	0	0	0	0	0	0	0	0	2	3.63323
TRINITY_DN13757_c0_g3	1	0.618442	0	0	3	1.75582	0	0	2	1.28042	0	0	0	0	1	0.687016	0	0
TRINITY_DN9245_c0_g1	495	30.5186	841	43.1194	703	42.5559	580	29.2481	236	13.7995	556	17.8559	265	14.0173	105	7.00412	175	8.38032
TRINITY_DN16684_c0_g1	1	0.293508	2	0.48007	2	0.562019	2	0.482268	1	0.28641	1	0.154102	1	0.243734	1	0.318131	0	0
TRINITY_DN26941_c0_g1	0	0	0	0	0	0	0	0	0	0	2	1.10299	0	0	3	3.41646	0	0
TRINITY_DN23569_c0_g1	0	0	4	0.999338	5	1.46178	0	0	0	0	1	0.160603	2	0.506961	2	0.662891	1	0.221432
TRINITY_DN13734_c1_g6	25	1.82627	29	1.76026	92	6.59038	12	0.717147	25	1.73443	32	1.21811	28	1.75199	33	2.60843	31	1.753
TRINITY_DN13734_c1_g4	521	14.4859	511	11.8448	514	14.0847	572	13	1176	30.8844	1137	16.4485	1645	39.4323	935	28.1205	994	21.6847
TRINITY_DN12103_c0_g1	17	1.93851	16	1.56453	13	1.40498	11	1.08277	25	2.98388	49.9999	3.07508	32.0001	3.68143	17	2.50092	30	3.00276
TRINITY_DN13734_c1_g2	1403	68.2458	1529	67.8177	1971	107.596	444.999	22.1668	682	47.1771	853	30.247	1918	143.093	711	45.3668	561	21.2207
TRINITY_DN13734_c1_g3	1766	69.8172	2086	69.769	1799	70.6464	1030	33.2207	1288	48.0513	1603	33.054	2585	88.0206	1501	64.2282	2323	71.6391
TRINITY_DN13734_c1_g1	2651	106.045	2042	67.8901	1396	55.0409	789	25.8671	2751	104.264	1946	40.5067	1124	38.917	981	42.5017	1372	43.0288
TRINITY_DN14255_c2_g4	12	1.25524	23	1.99447	24	2.45325	9	0.770626	0	0	8	0.436523	6	0.53516	0	0	0	0
TRINITY_DN14255_c2_g5	1	0.298424	2	0.48795	0	0	6	1.47121	0	0	3	0.470143	3	0.742964	2	0.646965	3	0.64971
TRINITY_DN14255_c2_g1	2605	78.8794	2638	69.8576	2553	84.2464	2658	63.0405	2433	71.2816	2925	48.4616	3152	93.8958	2419.01	91.3043	3039	79.0251
TRINITY_DN14255_c2_g2	7950	339.478	14435.2	490.661	10162	404.845	8852.99	348.979	18630.4	742.42	15536	411.405	25604	909.485	13957	872.963	10659	366.934
TRINITY_DN14255_c2_g3	1238	25.0644	1693	28.6188	2217	44.4122	1045	17.2747	900	17.156	1592	16.7414	2216	38.5916	1735	37.9117	1291	20.5436
TRINITY_DN11194_c0_g1	359	10.1023	451	10.5675	722	19.9916	390	8.94289	320	8.48245	394	5.76249	1205	29.2257	394	11.9654	468	10.2859
TRINITY_DN7181_c0_g2	15	6.99272	12	4.54321	12	5.28911	5	1.9323	6	2.80548	18	4.45405	9	3.4215	7	3.56328	13	4.21192
TRINITY_DN7181_c0_g1	1	0.734953	2	1.20958	2	1.40027	4	2.5248	5	3.89576	7	2.82095	5	2.98417	0	0	8	3.88722
TRINITY_DN20208_c0_g1	2	5.48997	0	0	0	0	0	0	1	3.09459	0	0	0	0	0	0	0	0
TRINITY_DN19108_c0_g1	0	0	0	0	0	0	0	0	1	3.40659	0	0	1	2.50592	1	3.55168	0	0
TRINITY_DN18109_c0_g1	0	0	0	0	0	0	0	0	0	0	0	0	0	0	0	0	2	3.17684
TRINITY_DN19257_c0_g1	0	0	0	0	0	0	0	0	0	0	0	0	0	0	0	0	2	2.99716
TRINITY_DN12067_c0_g1	19	2.50273	17	1.78267	21	2.40378	22	2.27243	3	0.36155	18	1.2153	57	6.23788	17	2.57168	18	1.79096
TRINITY_DN10101_c0_g1	1182	52.6882	1550	57.5467	2274	99.7243	3327	121.196	3095	130.465	3117.99	72.3221	3040	116.596	956	46.0919	1075	37.4243
TRINITY_DN1611_c0_g1	3	2.18269	0	0	0	0	0	0	0	0	0	0	0	0	0	0	4	1.92604
TRINITY_DN3054_c0_g1	1	0.53063	0	0	0	0	0	0	0	0	0	0	0	0	0	0	8	2.90867
TRINITY_DN14046_c1_g1	2545	225.668	5044	403.465	4923	448.166	1522	109.635	1288	85.7853	2018	92.3823	3332	233.404	2004	193.998	1327	91.9144
TRINITY_DN15824_c0_g1	3	5.44393	0	0	0	0	0	0	0	0	0	0	0	0	0	0	0	0
TRINITY_DN25916_c0_g1	1	1.42661	1	1.24238	1	1.43026	0	0	0	0	0	0	1	1.17615	0	0	0	0
TRINITY_DN3426_c0_g1	0	0	0	0	0	0	0	0	0	0	0	0	0	0	1	1.97136	3	3.01809
TRINITY_DN19458_c0_g1	0	0	0	0	0	0	0	0	0	0	0	0	0	0	0	0	3	5.16832
TRINITY_DN13567_c0_g1	90	3.59766	89.9999	2.48339	195	6.49309	43	1.42197	32	0.923359	74	1.15658	144	3.94476	47	1.56399	26	0.620986
TRINITY_DN12019_c0_g1	766	18.6883	1112	22.6235	2173	52.2765	802	15.9942	643	14.8047	784	9.94689	2411	50.7433	1008	26.5945	714	13.6849
TRINITY_DN13713_c0_g1	2194	41.5813	2972	50.4704	6344.01	137.777	1574	24.0111	586.999	10.2608	1359	13.2308	2448	45.3719	1182	25.7801	1387	26.3469
TRINITY_DN23445_c0_g1	0	0	1	0.673107	0	0	4	2.82316	1	0.87357	0	0	1	0.660816	1	0.927213	1	0.531436
TRINITY_DN20872_c0_g1	3	2.37248	2	1.30768	1	0.756409	1	0.684789	0	0	0	0	1	0.642923	0	0	5	2.59355
TRINITY_DN25754_c0_g1	0	0	0	0	0	0	0	0	0	0	0	0	0	0	0	0	2	2.44947
TRINITY_DN26829_c0_g1	1	2.1515	0	0	0	0	0	0	0	0	0	0	0	0	0	0	3	3.94404
TRINITY_DN18386_c0_g1	138	9.87812	127	7.55441	88	6.17797	14	0.81981	1	0.0679687	30	1.11894	7	0.429272	5	0.387258	1	0.0554343
TRINITY_DN14294_c3_g1	1	0.473022	2	0.768285	1	0.447126	6	2.35418	0	0	3	0.753686	0	0	0	0	4	1.31286
TRINITY_DN13632_c0_g1	234	4.16005	268	3.94973	380	6.66188	180	2.6029	75	1.23481	214	2.02458	245	3.81548	125	2.46869	124	1.81861
TRINITY_DN13972_c0_g1	5052	140.8	5980	139.02	4192	107.211	5107	113.559	2911	71.442	5694	80.7231	2588	55.7693	1117	30.0926	1294	25.2866
TRINITY_DN13972_c0_g2	45090	7172.23	48445	6364.02	24781	3823.34	3578	466.858	101	15.4897	2704.01	225.264	17	2.28186	28	4.82523	62	7.45071
TRINITY_DN10194_c0_g1	465	21.9869	641.001	25.3334	699	32.7257	2060	79.6205	1886	84.5664	1471	36.1719	1320	54.0028	612	31.4355	525	19.4886
TRINITY_DN27173_c0_g1	1	0.372067	1	0.302903	0	0	12	3.67772	1	0.367089	1	0.196085	1	0.305987	6	2.42413	13	3.44128
TRINITY_DN17222_c0_g1	0	0	0	0	0	0	0	0	0	0	0	0	0	0	0	0	4	6.11108
TRINITY_DN16383_c0_g1	0	0	0	0	1	2.38689	2	4.35107	0	0	1	1.32997	0	0	0	0	0	0
TRINITY_DN9340_c0_g1	64	5.7771	84	6.22227	51.0001	4.4836	9	0.664832	0	0	21	0.9686	0	0	0	0	1	0.0695207
TRINITY_DN25121_c0_g1	0	0	0	0	0	0	2	3.61884	0	0	0	0	0	0	0	0	0	0
TRINITY_DN8465_c0_g1	1	0.10881	2	0.18035	3	0.318839	0	0	2	0.207572	9	0.510907	10	0.92724	8	0.942122	2	0.166692
TRINITY_DN18981_c0_g1	0	0	0	0	0	0	0	0	0	0	0	0	0	0	0	0	3	3.31831
TRINITY_DN14826_c0_g1	1	0.591584	2	0.964077	3	1.6781	2	0.995241	0	0	1	0.318435	0	0	0	0	0	0
TRINITY_DN8380_c0_g1	4	0.9859	8	1.87753	8	2.08497	8	2.15364	5	1.50729	5	0.774723	6	1.23597	1	0.355042	4	0.848025
TRINITY_DN21593_c0_g1	1	1.42661	0	0	0	0	0	0	0	0	0	0	4	4.7046	1	1.7154	0	0
TRINITY_DN6964_c0_g1	993	60.1203	1459	73.3158	1947	115.608	1309	64.5799	1435	82.0459	1723	54.1528	2467	128.109	1874	122.555	1907	89.5342
TRINITY_DN24386_c0_g1	0	0	0	0	0	0	0	0	0	0	0	0	0	0	0	0	5	9.81344
TRINITY_DN22345_c0_g1	0	0	0	0	0	0	0	0	0	0	0	0	0	0	2	5.26886	0	0
TRINITY_DN27411_c0_g1	1	1.43753	0	0	0	0	0	0	0	0	0	0	1	1.18528	2	3.45857	0	0
TRINITY_DN22156_c0_g1	2	3.69274	0	0	2	3.77329	0	0	0	0	0	0	0	0	0	0	0	0
TRINITY_DN17571_c0_g1	0	0	0	0	1	1.52822	1	1.40772	0	0	1	0.882178	0	0	0	0	0	0
TRINITY_DN9974_c0_g1	23	2.00772	35	2.52412	33	2.82035	400	28.378	146	12.0826	398	17.9926	673	50.1017	274	25.836	187	12.5829
TRINITY_DN18128_c0_g1	0	0	0	0	0	0	0	0	0	0	0	0	0	0	0	0	2	2.70243
TRINITY_DN8368_c0_g1	193	23.7778	210	21.4709	286	35.3546	77	7.72681	81	9.18787	98	6.23422	196	19.8105	104	13.9996	95	8.90288
TRINITY_DN22221_c0_g1	0	0	0	0	0	0	0	0	0	0	0	0	0	0	1	2.41751	2	2.44947
TRINITY_DN12355_c0_g1	29	2.98157	26	1.99037	63	6.31645	7	0.413236	2	0.360355	5	0.342998	27	2.91428	16	2.28003	4	0.223498
TRINITY_DN12632_c0_g1	79	2.16987	97	2.21732	124	3.34469	257	5.75703	88.9999	2.30572	378	5.37612	1134	26.8094	542	16.029	521.001	11.1356
TRINITY_DN12632_c0_g2	13	0.704495	9	0.405819	6	0.319514	2	0.088637	10	0.513495	7	0.197548	28	1.30322	16	0.938074	13	0.548411
TRINITY_DN1562_c0_g1	0	0	0	0	0	0	1	0.188422	9	2.00083	1	0.120299	1	0.192387	0	0	0	0
TRINITY_DN1562_c0_g2	0	0	0	0	0	0	0	0	8	4.0584	1	0.26752	1	0.408722	0	0	0	0
TRINITY_DN15895_c0_g1	0	0	1	2.55185	0	0	0	0	0	0	0	0	0	0	1	3.39235	2	3.55578
TRINITY_DN27748_c0_g1	0	0	0	0	0	0	0	0	3	5.51031	0	0	0	0	0	0	0	0
TRINITY_DN8710_c0_g1	0	0	0	0	0	0	0	0	0	0	1	1.70133	1	2.50592	1	3.55168	0	0
TRINITY_DN14411_c0_g1	101	7.50588	107	6.6066	98	7.14073	30	1.82395	2	0.141178	23	0.890715	5	0.318213	8	0.643301	19	1.09261
TRINITY_DN8916_c0_g1	2	1.60774	0	0	1	0.769521	0	0	0	0	1	0.444515	0	0	2	1.8322	3	1.57885
TRINITY_DN8492_c0_g2	0	0	0	0	0	0	0	0	2	0.718456	3	0.576066	3	0.900099	0	0	0	0
TRINITY_DN8492_c0_g1	1	0.264255	1	0.216549	0	0	2	0.433918	1	0.256907	2	0.277185	8	1.68996	3	0.858998	0	0
TRINITY_DN14349_c0_g1	2	0.262889	0	0	5	0.640346	6	0.645898	4	0.502886	4	0.274513	2	0.223304	3	0.426857	7	0.700138
TRINITY_DN13929_c1_g1	24	1.52289	18	0.955504	42	2.57539	40	2.04345	142	8.93936	36	1.27861	176	9.85887	114	8.08124	120	6.30848
TRINITY_DN23370_c0_g1	0	0	0	0	1	1.92089	0	0	2	4.35917	0	0	0	0	1	2.27601	0	0
TRINITY_DN4831_c0_g1	1	2.68896	0	0	0	0	0	0	0	0	0	0	0	0	0	0	4	6.5465
TRINITY_DN9923_c1_g1	0	0	0	0	0	0	0	0	0	0	0	0	0	0	0	0	3	4.40897
TRINITY_DN18935_c0_g1	0	0	2	0.986238	4	2.2882	1	0.509589	0	0	1	0.326047	1	0.490764	0	0	3	1.22517
TRINITY_DN26260_c0_g1	2	5.37792	0	0	0	0	0	0	0	0	0	0	0	0	0	0	4	5.40866
TRINITY_DN12673_c0_g1	77	6.97587	95	7.14213	239	21.1915	74	5.48632	98	8.4498	97	4.58191	389	30.1101	167	16.3726	167	11.6511
TRINITY_DN17331_c0_g1	1	0.566744	0	0	0	0	0	0	0	0	0	0	0	0	0	0	11	4.24057
TRINITY_DN15096_c0_g1	1	2.6096	0	0	0	0	0	0	0	0	0	0	0	0	1	3.08153	2	3.17684
TRINITY_DN12821_c0_g1	387	5.56597	507	6.08504	599	8.50318	198	2.32716	69	0.935838	262	1.95972	416	5.16823	267	4.15338	164	1.85817
TRINITY_DN14270_c0_g1	1783	118.029	2041	110.841	950	61.2953	1746.99	88.6491	288	17.0962	1935	66.2153	550	27.7367	250	16.2878	333	14.2899
TRINITY_DN14270_c0_g3	39.0001	5.28168	59	6.59515	76	10.165	216	24.0175	446	58.1107	465	32.9896	592	68.3827	179	26.3058	302	31.1734
TRINITY_DN14270_c0_g2	412	12.7719	681	17.596	869	26.5457	524	13.2783	707	20.6942	861	13.8735	1172	31.3125	917	30.7468	807	19.6087
TRINITY_DN14270_c0_g5	2	0.439053	1	0.180474	0	0	13	2.34108	2	0.424497	9	1.03461	3	0.552501	1	0.237785	2	0.325737
TRINITY_DN14270_c0_g4	788	23.8307	1309	34.2385	1040	34.5776	518	13.0798	172	4.91344	381	6.23818	386.001	10.2595	200	6.62025	204	4.27138
TRINITY_DN14270_c0_g7	249	11.0726	304	11.1693	361	15.8279	203	7.45004	321	13.6925	419	9.72878	634	24.3241	267	12.8908	239	8.42
TRINITY_DN14270_c0_g6	158	4.81136	223	5.6801	151	4.62588	106	2.60101	370	10.5922	196	3.1245	149	3.92123	82	2.77084	98	2.39974
TRINITY_DN14270_c0_g9	772	32.3779	1314	45.8699	1851	76.3675	907	31.0687	914	36.2484	1214	26.475	3086	111.305	1259	57.0825	1159	37.7508
TRINITY_DN14270_c0_g8	33348	1724.61	33439.9	1360.62	17242	732.087	140445	6431.34	131379	7462.49	252322	7420.84	258750	14470.7	167123	9934.33	264195	11814.8
TRINITY_DN17484_c0_g1	0	0	0	0	0	0	0	0	0	0	0	0	0	0	0	0	4	8.22108
TRINITY_DN15462_c0_g1	0	0	0	0	0	0	0	0	0	0	0	0	0	0	0	0	2	2.99716
TRINITY_DN9108_c0_g1	2760	135.867	3298.99	134.787	3145	151.548	2502	100.223	2013	92.9907	2986.01	75.983	4040	169.898	2503	132.277	3297	125.811
TRINITY_DN14319_c4_g3	3	0.840932	0	0	10	2.66702	0	0	0	0	0	0	15	3.47872	0	0	0	0
TRINITY_DN14319_c4_g2	1	0.31579	0	0	0	0	4	1.03836	585.106	180.834	0	0	0	0	0	0	0	0
TRINITY_DN14319_c4_g1	25.2984	14.8125	1	0.389843	0	0	0	0	0	0	0	0	0	0	0	0	1	0.332548
TRINITY_DN741_c0_g1	3	4.62229	0	0	1	1.55438	1	1.43176	1	1.77712	1	0.896727	2	2.54596	0	0	0	0
TRINITY_DN18055_c0_g1	1	0.984735	1	0.828743	0	0	3	2.62413	0	0	0	0	1	0.804149	0	0	1	0.631755
TRINITY_DN22127_c0_g1	1	1.98135	0	0	0	0	0	0	0	0	0	0	0	0	2	4.79292	0	0
TRINITY_DN6603_c0_g1	0	0	1	1.89621	2	4.37891	0	0	0	0	0	0	2	3.52331	0	0	0	0
TRINITY_DN22655_c0_g1	1	0.604744	3	1.47936	4	2.2882	1	0.509589	0	0	0	0	0	0	0	0	0	0
TRINITY_DN19672_c0_g1	2	4.3867	0	0	0	0	0	0	0	0	0	0	0	0	0	0	0	0
TRINITY_DN19837_c0_g1	0	0	0	0	1	3.30195	0	0	0	0	0	0	3	7.899	0	0	1	1.98498
TRINITY_DN8870_c0_g1	52	3.38363	52	2.81315	115	7.34444	28	1.49031	19	1.17302	30	1.01695	29	1.61817	11	0.774441	11	0.555387
TRINITY_DN21246_c0_g1	2	1.44059	1	0.591916	0	0	0	0	1	0.76137	0	0	0	0	1	0.811616	1	0.477192
TRINITY_DN18489_c0_g1	1	0.256632	0	0	0	0	1	0.210667	9	2.24334	2	0.269116	1	0.214184	1	0.278054	5	0.942071
TRINITY_DN11639_c0_g1	145	12.7903	171	11.632	361	27.8831	111	7.30025	214	15.6889	203	8.15364	1250	83.204	350	30.5488	208	12.4785
TRINITY_DN2376_c0_g1	0	0	0	0	0	0	0	0	0	0	0	0	2	3.93882	0	0	2	2.91113
TRINITY_DN21690_c0_g1	2	6.72685	0	0	0	0	0	0	0	0	0	0	0	0	0	0	0	0
TRINITY_DN10992_c0_g1	6	0.402844	8	0.464527	23	1.608	33	1.85264	10	0.655359	64	2.41224	260	15.3687	88	6.5737	66	3.50493
TRINITY_DN16909_c0_g1	5	1.88256	10	3.06462	5	1.78878	14	4.34292	7	2.60216	4	0.793935	6	1.85697	1	0.408926	0	0
TRINITY_DN18748_c0_g1	2	4.5576	0	0	0	0	0	0	0	0	0	0	0	0	0	0	1	1.38879
TRINITY_DN5320_c0_g1	2	5.77666	0	0	0	0	1	2.66716	1	3.22873	0	0	0	0	0	0	6	10.555
TRINITY_DN14915_c0_g1	0	0	0	0	1	2.4335	1	2.21703	0	0	0	0	0	0	0	0	0	0
TRINITY_DN16567_c0_g1	1	2.03568	1	1.81081	0	0	0	0	0	0	0	0	1	1.68539	0	0	0	0
TRINITY_DN18193_c0_g1	0	0	0	0	0	0	1	2.15556	0	0	0	0	2	3.79512	0	0	1	1.40168
TRINITY_DN7911_c0_g1	1313	50.8054	1711	55.1498	2019	76.901	1727	54.6341	1198	43.8422	2470	49.7459	2868	95.5252	1913	80.0747	2639	79.8589
TRINITY_DN19709_c0_g1	0	0	0	0	0	0	0	0	0	0	0	0	0	0	0	0	4	6.75044
TRINITY_DN18053_c0_g1	0	0	0	0	1	3.4085	0	0	0	0	0	0	0	0	0	0	2	4.11054
TRINITY_DN15735_c0_g1	0	0	0	0	0	0	0	0	2	7.17623	0	0	0	0	0	0	0	0
TRINITY_DN22645_c0_g1	0	0	2	0.510705	3	0.896222	1	0.256967	0	0	2	0.328542	1	0.258963	1	0.338956	2	0.451993
TRINITY_DN21261_c0_g1	0	0	0	0	0	0	0	0	0	0	0	0	0	0	0	0	3	3.6742
TRINITY_DN5044_c0_g1	0	0	0	0	0	0	0	0	0	0	0	0	0	0	0	0	3	3.6107
TRINITY_DN5044_c0_g2	2	0.582901	0	0	0	0	0	0	0	0	0	0	0	0	0	0	18	3.8145
TRINITY_DN22919_c0_g1	0	0	1	1.65295	1	1.90368	1	1.74648	0	0	0	0	1	1.54334	0	0	0	0
TRINITY_DN24135_c0_g1	0	0	0	0	0	0	0	0	0	0	0	0	0	0	0	0	5	8.26692
TRINITY_DN20559_c0_g1	1	2.30038	0	0	0	0	0	0	0	0	1	1.31833	0	0	1	2.75379	0	0
TRINITY_DN27971_c0_g1	1	1.01602	1	0.857442	0	0	0	0	0	0	1	0.574562	2	1.66085	1	1.18699	0	0
TRINITY_DN23145_c0_g1	7	1.69841	8	1.59308	3	0.700651	13	2.58855	3	0.705762	3	0.381464	13	2.6376	3	0.788561	2	0.357673
TRINITY_DN23003_c0_g1	0	0	0	0	0	0	0	0	0	0	0	0	0	0	0	0	3	4.96015
TRINITY_DN16100_c0_g1	101	10.512	118	10.1815	228	23.1903	163	13.8867	193	19.1488	201	10.9124	221	19.6143	101	11.3768	224	17.8826
TRINITY_DN18658_c0_g1	2	5.32333	0	0	0	0	0	0	0	0	0	0	0	0	0	0	0	0
TRINITY_DN21090_c0_g1	0	0	0	0	0	0	0	0	0	0	0	0	0	0	0	0	2	4.11054
TRINITY_DN23885_c0_g1	1	1.98135	1	1.76237	0	0	0	0	1	2.29727	0	0	0	0	1	2.39646	0	0
TRINITY_DN18397_c0_g1	9	3.1436	1	0.284684	3	0.997917	0	0	0	0	1	0.183852	0	0	0	0	1	0.250016
TRINITY_DN24825_c0_g1	0	0	0	0	0	0	0	0	0	0	0	0	0	0	2	7.10336	0	0
TRINITY_DN27228_c0_g1	0	0	0	0	0	0	0	0	4	5.41176	2	1.37562	0	0	0	0	0	0
TRINITY_DN9131_c0_g1	1091	26.4627	1518	30.7038	1793	42.8783	867	17.1886	1051	24.0685	1096	13.8301	3566	74.6088	1307	34.2907	758	14.4411
TRINITY_DN11883_c0_g1	13	2.30471	20	3.30183	17	0.982309	32	3.33842	26	1.84777	37	1.90105	66	3.01412	22	1.75534	10	0.665787
TRINITY_DN4601_c0_g1	4	1.134	0	0	8	2.17363	1	0.232854	0	0	0	0	3	0.707212	0	0	0	0
TRINITY_DN20197_c0_g1	1	1.21577	0	0	0	0	0	0	0	0	0	0	0	0	3	4.33488	2	1.53018
TRINITY_DN11573_c0_g1	3967	148.178	5565.01	173.189	4403	159.294	8378	255.101	4484	156.263	7927	152.378	9605	297.712	6695	269.666	4640	131.775
TRINITY_DN16022_c0_g1	73	8.92624	71	7.18778	139	16.5768	29	2.90362	5	0.584114	12	0.765867	4	0.416002	3	0.397061	2	0.186586
TRINITY_DN25418_c0_g1	3	2.19373	1	0.601531	1	0.69639	3	1.88293	1	0.774631	2	0.801495	1	0.593758	0	0	2	0.967398
TRINITY_DN20525_c0_g1	0	0	1	1.05123	0	0	0	0	0	0	0	0	0	0	0	0	8	6.12071
TRINITY_DN7686_c0_g2	6	0.58855	7	0.569494	8	0.767394	22	1.76627	5	0.467207	20	1.02315	168	14.0647	52	5.52017	52	3.91939
TRINITY_DN7686_c0_g1	0	0	1	0.834398	0	0	0	0	2	2.18813	1	0.559002	5	4.04659	1	1.15449	5	3.17656
TRINITY_DN26823_c0_g1	0	0	0	0	0	0	0	0	0	0	0	0	0	0	0	0	2	3.41012
TRINITY_DN21858_c0_g1	0	0	0	0	0	0	0	0	0	0	0	0	0	0	0	0	3	4.81237
TRINITY_DN19388_c0_g1	1	2.80184	1	2.45816	0	0	0	0	0	0	0	0	0	0	2	6.55593	0	0
TRINITY_DN2547_c0_g2	0	0	0	0	0	0	0	0	0	0	0	0	1	0.575951	0	0	4	1.88334
TRINITY_DN2547_c0_g1	0	0	0	0	0	0	1	0.319949	0	0	0	0	0	0	0	0	10	2.74977
TRINITY_DN14307_c1_g1	436	13.1283	713	18.325	1122	33.582	409	10.1752	561	15.7699	1037	16.4109	1668	43.3846	1197	39.3677	934	22.331
TRINITY_DN14307_c1_g2	4	0.80565	3	0.497399	5	0.973727	8	1.32134	7	1.36011	14	1.47569	7	1.18581	5	1.09068	1	0.150202
TRINITY_DN20084_c0_g1	1	2.91867	1	2.55185	0	0	0	0	0	0	1	1.62519	0	0	0	0	0	0
TRINITY_DN5884_c0_g1	7	0.853425	4	0.412202	7	0.850395	9	0.954699	8	0.931796	3	0.202872	18	1.8666	4	0.527858	6	0.591706
TRINITY_DN13929_c3_g4	297	20.5828	695	38.2788	598.001	39.3788	222	10.8571	37	2.11619	136	4.341	57	3.02604	80	5.49644	147	7.23433
TRINITY_DN14931_c0_g1	0	0	0	0	0	0	0	0	0	0	0	0	0	0	0	0	4	5.45463
TRINITY_DN11610_c0_g1	23	1.46147	36	1.90204	43	2.68215	40	2.07896	23	1.38637	66	2.18464	124	6.75807	30	2.0625	16	0.789225
TRINITY_DN12933_c0_g1	569.999	9.80758	502	7.21844	471	8.06368	607	8.48821	399	6.54134	690	6.15017	1103	16.5671	601	11.1423	762	10.3195
TRINITY_DN23103_c0_g1	2	2.09749	0	0	2	2.04843	2	1.87651	0	0	0	0	0	0	0	0	0	0
TRINITY_DN3950_c0_g1	0	0	0	0	0	0	0	0	0	0	0	0	0	0	0	0	6	4.08435
TRINITY_DN15625_c0_g1	1	2.23603	0	0	0	0	0	0	0	0	0	0	2	3.69187	0	0	0	0
TRINITY_DN10301_c0_g1	191	6.97842	262	7.97523	366	13.1662	75	2.24024	117	4.04192	165	3.13756	77	2.42239	27	1.06713	26	0.74339
TRINITY_DN14202_c1_g1	0	0	0	0	0	0	0	0	0	0	0	0	0	0	1	3.08153	0	0
TRINITY_DN16187_c0_g1	0	0	1	1.84405	0	0	2	3.89191	0	0	1	1.19893	0	0	0	0	0	0
TRINITY_DN10045_c0_g1	71	3.90716	73.9999	3.3944	135	7.29683	42	1.89021	23	1.22343	52	1.49398	10	0.472579	2	0.122431	1	0.0440141
TRINITY_DN27665_c0_g1	0	0	0	0	0	0	0	0	0	0	0	0	0	0	0	0	2	3.96996
TRINITY_DN26573_c0_g1	0	0	0	0	0	0	0	0	0	0	0	0	0	0	0	0	2	3.92538
TRINITY_DN25826_c0_g1	246	14.722	429	21.3533	754	44.3134	253	12.3836	176	9.98718	241	7.51226	582	29.89	344	22.2736	353	16.4174
TRINITY_DN14708_c0_g1	51	6.24841	46	4.66596	52	6.21342	35	3.51128	16	1.8729	91	5.81931	5	0.521008	4	0.530458	5	0.467351
TRINITY_DN14303_c2_g4	750	16.7545	1000	18.3212	1146	25.7108	588	10.0103	750	15.5546	1020	11.409	2227	44.0116	1279	29.9219	585	9.9608
TRINITY_DN15943_c0_g1	8	2.55867	1	0.261119	1	0.30541	3	0.788831	7	2.19233	6	1.00866	1	0.264686	1	0.346813	2	0.461505
TRINITY_DN16929_c0_g1	0	0	0	0	0	0	0	0	0	0	0	0	0	0	1	3.71278	5	9.92491
TRINITY_DN10160_c0_g1	683	56.0303	940	64.0634	952	76.7033	530	35.5819	538	41.97	668	28.5515	860	60.4788	308	27.3088	265	16.6228
TRINITY_DN19016_c0_g1	0	0	0	0	0	0	0	0	0	0	0	0	0	0	0	0	4	4.31848
TRINITY_DN18104_c0_g1	2	3.99886	0	0	0	0	0	0	0	0	0	0	0	0	2	4.83503	0	0
TRINITY_DN14110_c0_g1	184.186	152.847	65.857	45.7308	10.0016	7.98001	42.6702	33.5548	117.937	164.33	60.9671	34.5139	225.033	168.257	45.8445	45.1457	1	0.601288
TRINITY_DN24563_c0_g1	0	0	0	0	0	0	0	0	0	0	0	0	0	0	0	0	2	3.14593
TRINITY_DN11993_c0_g1	2603.99	68.5809	4946.01	108.839	2049	53.1719	1627	35.2303	1418	34.2265	1658	22.3407	1792	39.8445	914.001	25.6311	687	13.978
TRINITY_DN23606_c0_g1	3	6.83639	0	0	1	2.34213	2	4.27236	2	5.23694	0	0	3	5.64063	0	0	1	1.38879
TRINITY_DN12285_c0_g1	3583	82.4386	5109.01	97.9563	4268	96.8247	4190	78.7664	3829	83.1169	5338	63.8771	5671	112.545	3302	82.1391	3960	71.6108
TRINITY_DN14303_c2_g9	56	3.15279	41	1.92034	61	3.37396	32	1.47341	10	0.533604	41	1.20216	22	1.06346	6	0.365466	20	0.875976
TRINITY_DN21796_c0_g1	0	0	0	0	0	0	0	0	0	0	0	0	0	0	1	2.95316	2	3.02624
TRINITY_DN18010_c0_g1	0	0	0	0	0	0	0	0	0	0	0	0	0	0	1	3.45564	1	1.81661
TRINITY_DN379_c0_g1	0	0	0	0	3	0.752022	1	0.214217	3	0.760719	1	0.136834	6	1.30587	0	0	1	0.191341
TRINITY_DN13444_c0_g1	2018	41.403	2518	44.803	2314	47.9308	853	15.0764	653	12.6618	1046	11.1252	1849	32.8897	999	22.3006	957	15.4648
TRINITY_DN27423_c0_g1	0	0	0	0	0	0	0	0	0	0	0	0	0	0	0	0	4	6.82024
TRINITY_DN7121_c0_g1	49	3.60062	45	2.74748	55	3.96297	60	3.60693	70	4.88532	132	5.05445	60	3.77618	25	1.98776	32	1.81999
TRINITY_DN79_c0_g1	9	1.60039	15	2.19944	14	2.4133	13	1.89484	5	0.855233	8	0.743892	18	2.70102	8	1.54042	17	2.26963
TRINITY_DN79_c0_g2	2	1.24246	1	0.507047	2	1.17597	1	0.524692	0	0	0	0	0	0	0	0	0	0
TRINITY_DN7855_c0_g1	3	0.432205	17	1.44643	19	1.90575	1	0.177258	1	0.097809	5	0.452594	9	0.940518	2	0.222123	0	0
TRINITY_DN20999_c0_g1	0	0	1	1.56527	0	0	1	1.65612	1	2.05087	0	0	0	0	0	0	0	0
TRINITY_DN24286_c0_g1	1	2.21467	1	1.96928	1	2.27569	0	0	0	0	1	1.27324	0	0	0	0	0	0
TRINITY_DN22490_c0_g1	0	0	0	0	0	0	0	0	0	0	0	0	0	0	0	0	4	3.08016
TRINITY_DN16647_c0_g1	23	12.9801	28	12.8592	10	5.33264	40	18.9187	56	32.3423	33	9.99024	23	10.5399	12	7.47109	28	10.7537
TRINITY_DN5495_c0_g1	0	0	0	0	0	0	0	0	0	0	0	0	0	0	0	0	7	4.05472
TRINITY_DN19462_c0_g1	0	0	0	0	0	0	0	0	0	0	0	0	0	0	2	4.91932	0	0
TRINITY_DN16095_c0_g1	22	4.61007	0	0	4	0.809735	0	0	0	0	0	0	0	0	3	0.680884	5	0.779542
TRINITY_DN18813_c0_g1	2	6.57636	0	0	0	0	0	0	0	0	0	0	0	0	0	0	0	0
TRINITY_DN8815_c0_g1	1	1.14257	3	2.92382	2	2.24798	0	0	1	1.28303	0	0	0	0	0	0	0	0
TRINITY_DN21159_c0_g1	2	1.20949	0	0	0	0	0	0	0	0	0	0	0	0	2	1.34119	3	1.22517
TRINITY_DN20021_c0_g1	0	0	0	0	1	2.38689	0	0	0	0	1	1.32997	0	0	1	2.77791	0	0
TRINITY_DN27610_c0_g1	0	0	0	0	0	0	1	1.67066	1	2.06894	0	0	2	2.95566	2	4.32156	0	0
TRINITY_DN12977_c0_g1	342	10.1119	788	19.4237	507	14.8961	693	16.6965	615	17.0399	673	10.2546	2333	59.2017	885.999	29.1859	670	15.9869
TRINITY_DN12516_c0_g1	4511	404.925	5868	436.776	5541	486.448	6592	484.26	3656	314.828	9182	430.166	7816	601.827	6090	591.183	9602	662.888
TRINITY_DN26689_c0_g1	2	4.83058	0	0	0	0	0	0	0	0	0	0	0	0	0	0	0	0
TRINITY_DN12429_c0_g1	2711	80.6558	2597	62.7289	2058	62.1501	3168	78.0826	1443	43.3517	5506	86.6914	2080	58.6761	1742	59.571	1092	25.7419
TRINITY_DN1354_c0_g1	0	0	0	0	0	0	0	0	0	0	0	0	0	0	0	0	3	5.95494
TRINITY_DN25469_c0_g1	0	0	0	0	0	0	0	0	0	0	0	0	0	0	0	0	5	8.43805
TRINITY_DN19588_c0_g1	2	4.03493	0	0	0	0	0	0	0	0	0	0	0	0	0	0	0	0
TRINITY_DN9570_c0_g1	122	6.31257	130	5.60988	257	13.123	50	2.09943	50	2.47103	87	2.34128	130	5.81808	43	2.38936	41	1.60566
TRINITY_DN26713_c0_g1	0	0	0	0	0	0	0	0	0	0	0	0	0	0	0	0	2	3.4816
TRINITY_DN19158_c0_g1	0	0	0	0	0	0	3	1.9712	0	0	1	0.419255	0	0	0	0	1	0.501805
TRINITY_DN8504_c0_g3	4	0.461886	10	0.956492	2	0.225408	6	0.567241	16	1.76367	21	1.26538	2	0.196615	1	0.124981	1	0.0882761
TRINITY_DN8504_c0_g2	12	0.89553	4	0.248007	7	0.512175	3	0.183162	8	0.567103	12	0.466676	1	0.0639069	4	0.323001	2	0.115484
TRINITY_DN8504_c0_g1	0	0	3	1.92817	0	0	0	0	4	3.3268	2	0.858174	0	0	1	0.884062	0	0
TRINITY_DN25707_c0_g1	1	0.459541	1	0.37322	3	1.30371	0	0	0	0	1	0.243774	0	0	2	1.00301	0	0
TRINITY_DN27098_c0_g1	3	7.17538	0	0	0	0	0	0	0	0	0	0	0	0	0	0	0	0
TRINITY_DN16823_c0_g1	0	0	0	0	0	0	0	0	0	0	0	0	0	0	0	0	4	4.49814
TRINITY_DN23538_c0_g1	0	0	2	3.33628	2	3.84179	0	0	0	0	1	1.093	0	0	0	0	0	0
TRINITY_DN20836_c0_g1	57	6.65597	84	8.12421	47	5.35595	0	0	0	0	0	0	0	0	0	0	2	0.178472
TRINITY_DN13865_c6_g1	503	47.2548	647	50.4281	1014	93.199	225	17.2994	183	16.3689	250	12.2471	828	66.4287	245	24.9085	235	16.9848
TRINITY_DN21770_c0_g1	0	0	0	0	0	0	6	5.00289	1	1.035	0	0	0	0	1	1.09358	1	0.607815
TRINITY_DN3305_c0_g1	26	2.98564	5	0.475621	48	5.38023	0	0	0	0	0	0	2	0.195544	1	0.124289	0	0
TRINITY_DN9972_c0_g2	1	1.29586	2	2.23657	2	2.5772	0	0	0	0	1	0.747577	7	7.45826	1	1.54817	2	1.62235
TRINITY_DN9972_c0_g1	965	42.7938	1223	45.1595	1418	61.8597	577	20.9219	451	18.9285	719	16.5989	1380	52.6347	599	28.7364	476	16.4803
TRINITY_DN3305_c0_g2	0	0	2	3.36694	1	1.93835	0	0	0	0	0	0	0	0	0	0	0	0
TRINITY_DN17999_c0_g1	0	0	0	0	0	0	0	0	0	0	0	0	0	0	0	0	2	2.55966
TRINITY_DN16991_c0_g1	6	2.38719	5	1.61786	4	1.50987	38	12.4711	6	2.36513	27	5.67096	11	3.58965	6	2.59516	3	0.843594
TRINITY_DN15111_c0_g1	3	10.0903	0	0	0	0	0	0	0	0	0	0	0	0	0	0	0	0
TRINITY_DN21001_c0_g1	22	1.23692	19	0.888714	21	1.15996	44	2.02319	6	0.319726	25	0.732026	5	0.241371	0	0	7	0.306183
TRINITY_DN1040_c0_g1	0	0	0	0	2	2.16769	0	0	0	0	1	0.629464	0	0	1	1.30218	5	3.50665
TRINITY_DN16219_c0_g1	0	0	1	0.443922	4	2.06279	4	1.82572	5	2.78219	4	1.16882	11	4.87839	6	3.60546	4	1.49153
TRINITY_DN8842_c0_g1	2	5.16957	0	0	1	2.65448	1	2.41014	1	2.93536	0	0	0	0	0	0	1	1.57297
TRINITY_DN15926_c0_g1	0	0	0	0	0	0	0	0	0	0	0	0	0	0	0	0	4	4.18456
TRINITY_DN20731_c0_g1	2	5.60369	0	0	0	0	0	0	0	0	0	0	0	0	0	0	0	0
TRINITY_DN23466_c0_g1	1	0.220694	1	0.181419	0	0	0	0	2	0.426816	4	0.462291	3	0.555348	4	0.956206	2	0.327361
TRINITY_DN14779_c0_g1	0	0	0	0	0	0	0	0	0	0	0	0	0	0	0	0	3	3.08977
TRINITY_DN20385_c0_g1	1	1.79911	0	0	1	1.83589	1	1.68552	0	0	0	0	1	1.49075	0	0	0	0
TRINITY_DN17024_c0_g1	0	0	0	0	0	0	0	0	0	0	0	0	0	0	0	0	4	5.30649
TRINITY_DN26292_c0_g1	0	0	0	0	0	0	0	0	0	0	0	0	0	0	0	0	1	1.23556
TRINITY_DN27392_c0_g1	2	3.59822	0	0	0	0	0	0	0	0	0	0	0	0	0	0	0	0
TRINITY_DN12711_c0_g1	11472	213.088	17004	263.14	8893	162.83	7063	106.723	4464.01	78.2027	10003	96.5345	3709	59.3672	3968	79.6828	8910	130.185
TRINITY_DN13376_c0_g1	2631	53.9206	3042	51.9166	4188	84.6185	2204	36.9705	3420	66.5605	3615	38.6313	7433.01	132.303	3668	81.6574	3817	61.8674
TRINITY_DN13628_c1_g1	534	20.0309	834	26.0129	1143	42.1888	988	30.4034	797	28.2254	1137	22.1809	1996	64.1165	1107	44.7688	1143	33.7277
TRINITY_DN13628_c1_g2	22	1.72996	22	1.43686	22	1.69537	61	3.92455	29	2.16718	105	4.30325	46	3.09579	19	1.61668	20	1.2154
TRINITY_DN26753_c0_g1	0	0	0	0	0	0	0	0	2	5.77372	0	0	0	0	0	0	0	0
TRINITY_DN14449_c0_g1	0	0	0	0	0	0	0	0	0	0	0	0	0	0	0	0	2	4.11054
TRINITY_DN9594_c0_g2	0	0	0	0	1	0.431536	0	0	1	0.456783	2	0.48395	4	1.4894	0	0	1	0.317865
TRINITY_DN9594_c0_g1	1	0.73869	0	0	2	3.72164	0	0	0	0	0	0	0	0	0	0	6	2.92873
TRINITY_DN18830_c0_g1	0	0	0	0	0	0	0	0	0	0	0	0	0	0	0	0	4	3.52219
TRINITY_DN12048_c0_g1	2602	148.707	3080.99	137.243	1763	103.685	3721	178.447	152	8.47993	3077	95.241	491	27.4744	231	15.3083	398	16.5675
TRINITY_DN17032_c0_g1	0	0	1	2.41305	1	2.81475	0	0	0	0	0	0	1	2.2473	0	0	1	1.67038
TRINITY_DN14094_c1_g1	25	6.36333	35	7.30544	41	10.0325	26	5.43234	65	16.0652	41	5.47137	39	8.28727	14	3.86086	10	1.86984
TRINITY_DN7145_c0_g2	0	0	1	0.194663	4	0.9134	9	1.75095	3	0.689162	5	0.621127	7	1.38886	3	0.770508	8	1.40018
TRINITY_DN7145_c0_g1	0	0	1	0.244548	0	0	3	0.73738	2	0.584237	0	0	5	1.24113	3	0.972784	2	0.434093
TRINITY_DN7414_c0_g1	156	8.59291	97	4.45667	102	5.55437	69	3.09767	71.0001	3.74558	77	2.24882	358	17.1966	151	9.06282	261	11.2595
TRINITY_DN27407_c0_g1	2	5.37792	0	0	0	0	0	0	0	0	0	0	0	0	0	0	0	0
TRINITY_DN13887_c5_g1	3	0.228961	2	0.126801	0	0	29	1.81078	1	0.0725109	12	0.47729	12	0.784089	8	0.660664	10	0.590221
TRINITY_DN18940_c0_g1	0	0	0	0	0	0	0	0	0	0	0	0	0	0	0	0	2	4.06252
TRINITY_DN18409_c0_g1	0	0	0	0	0	0	0	0	0	0	2	2.52418	0	0	1	2.63443	0	0
TRINITY_DN10020_c0_g1	120	6.45178	174	7.99627	263	14.2567	34.9999	1.54729	57	2.97373	63	1.79673	138	6.53388	81	4.83056	87	3.76499
TRINITY_DN23512_c0_g1	5379	330.163	4841	247.109	3096	186.589	3036	152.418	2104	122.476	5645	180.482	2808	147.877	3488	231.637	6484	309.15
TRINITY_DN20849_c0_g1	31	2.24743	35	2.10846	127	9.0222	198	11.7432	450	30.9199	350	13.222	517	32.0867	194	15.2183	168	9.42973
TRINITY_DN20807_c0_g1	203	19.3189	316	24.9474	316	29.4178	310	24.145	509	46.1272	403	19.9998	643	52.2479	529	54.4816	1056	77.2871
TRINITY_DN18962_c0_g1	2	0.675951	4	1.10256	4	1.28877	51	14.1794	2	0.663599	14	2.48921	3	0.837219	0	0	6	1.45596
TRINITY_DN23514_c0_g1	0	0	0	0	0	0	2	5.38478	1	3.2578	2	3.25037	0	0	0	0	1	1.77789
TRINITY_DN12376_c0_g1	379	14.9055	471	15.3718	654	25.6471	242	8.0141	60	3.19927	187	5.11654	69	2.35144	41	1.72917	49	1.57354
TRINITY_DN14177_c1_g2	369.046	26.23	529	31.7816	589	36.4672	572	36.74	412	25.2561	829	34.2261	812.001	49.2423	354	29.5562	521	33.2078
TRINITY_DN14177_c1_g3	2147	145.374	1711	96.1436	1287	85.5847	2166	120.09	115	7.3718	2127	75.1351	42	2.44352	130	9.54692	302	15.8915
TRINITY_DN24477_c0_g1	0	0	0	0	0	0	0	0	0	0	0	0	0	0	0	0	2	2.60582
TRINITY_DN14177_c1_g1	33	2.44546	31	2.00674	45.0001	2.82409	91	5.51008	126	14.0852	181	9.35597	112	10.2217	55	3.44409	65.0001	6.84553
TRINITY_DN14177_c1_g6	205857	4313.7	262228	4581.27	177503	3674.59	109850	1898.23	281505	5662.79	116701	1281.53	93049	1688.04	80044	1821.94	168609	2948.83
TRINITY_DN14177_c1_g7	205	8.26366	453	15.2095	500	19.8363	222	7.31663	122	4.65215	129	2.70674	403	13.9803	143	6.23584	77	2.42626
TRINITY_DN14177_c1_g4	1996.95	75.5966	3533	86.6909	3326	103.074	4056.01	85.7651	2171	44.7554	2401	34.889	4782	90.2245	2529	58.6703	2806	50.6394
TRINITY_DN14177_c1_g5	1516	47.6337	2221	58.6245	1624	50.8032	723	16.9948	1077	31.5298	1186	19.5598	1759	48.1594	859	29.4452	691	16.4712
TRINITY_DN24354_c0_g1	1	2.63517	0	0	0	0	0	0	0	0	0	0	0	0	1	3.10865	0	0
TRINITY_DN24992_c0_g1	1	2.66166	0	0	0	0	0	0	0	0	0	0	1	2.18283	0	0	0	0
TRINITY_DN4376_c0_g1	1	0.997103	0	0	0	0	0	0	0	0	0	0	0	0	2	2.32495	2	1.27779
TRINITY_DN9481_c0_g1	1	0.695654	0	0	0	0	1	0.593988	0	0	0	0	0	0	0	0	12	5.55069
TRINITY_DN640_c0_g1	0	0	0	0	0	0	0	0	0	0	0	0	0	0	0	0	3	2.37062
TRINITY_DN2357_c0_g1	0	0	0	0	0	0	0	0	0	0	0	0	1	1.57009	2	4.59074	1	1.16286
TRINITY_DN24324_c0_g1	0	0	0	0	0	0	0	0	0	0	0	0	0	0	0	0	2	3.96996
TRINITY_DN25822_c0_g1	199	19.1431	301	24.0185	827	77.813	294	23.147	153	14.0171	283	14.1969	645	52.9696	292	30.3986	292	21.5957
TRINITY_DN17602_c0_g1	4	5.45691	0	0	1	1.36221	0	0	0	0	0	0	0	0	0	0	1	0.85051
TRINITY_DN27235_c0_g1	9	7.00416	6	3.85634	2	1.48735	8	5.38136	9	7.4853	7	3.00361	0	0	3	2.65219	1	0.511338
TRINITY_DN3946_c0_g1	1183	164.594	1314	151.27	1826	247.634	155	17.6584	20	2.66906	291	21.1841	46	5.4404	19	2.86707	17	1.79899
TRINITY_DN22997_c0_g1	0	0	0	0	0	0	0	0	0	0	0	0	0	0	0	0	3	4.32531
TRINITY_DN522_c0_g1	1	0.163571	1	0.135018	0	0	7	0.938281	2	0.314127	8	0.683949	0	0	1	0.177102	10	1.23312
TRINITY_DN25041_c0_g1	0	0	0	0	0	0	0	0	2	6.92695	0	0	0	0	0	0	0	0
TRINITY_DN7914_c0_g1	490	10.2474	580	10.1244	702	14.4868	258	4.40172	377	7.42724	388	4.21856	657	11.858	400	9.04532	174	2.85401
TRINITY_DN8587_c0_g1	14	1.99595	35	5.81758	13	2.93352	173	35.3908	47	13.7031	66	9.62065	15	2.47331	14	2.5253	20	4.06538
TRINITY_DN18657_c0_g1	2	4.303	0	0	0	0	0	0	0	0	0	0	0	0	0	0	0	0
TRINITY_DN22643_c0_g1	0	0	0	0	0	0	0	0	0	0	0	0	0	0	0	0	4	5.11932
TRINITY_DN20010_c0_g1	0	0	0	0	0	0	0	0	2	7.04988	0	0	0	0	0	0	0	0
TRINITY_DN7369_c0_g1	7	0.928941	0	0	0	0	0	0	0	0	1	0.0692896	0	0	6	0.861913	66	6.66219
TRINITY_DN12062_c0_g1	32	1.67126	16	0.695392	37	1.89766	9	0.38953	7	0.34378	18	0.48956	21	0.954731	13	0.729159	21	0.848116
TRINITY_DN12062_c0_g2	3	0.685162	4	0.750553	2	0.440361	4	0.749525	1	0.221057	1	0.119632	0	0	2	0.494795	3	0.50705
TRINITY_DN19717_c0_g1	2	3.47909	0	0	0	0	0	0	0	0	0	0	0	0	0	0	0	0
TRINITY_DN4300_c0_g1	2	0.644612	1.10293	0.290179	5	1.5385	4	1.05999	0	0	1	0.169428	2	0.533301	0	0	0	0
TRINITY_DN4300_c0_g2	6	2.70889	6.89707	2.52913	5	2.13531	4	1.49523	0	0	4	0.957283	0	0	3	1.4772	3	0.944615
TRINITY_DN20927_c0_g1	6	0.976297	5	0.671601	4	0.631978	12	1.60005	5	0.781131	18	1.5308	7	0.963215	7	1.23323	9	1.10427
TRINITY_DN13881_c0_g1	80	3.15836	68	2.23617	43	1.67091	224	7.23024	152	5.67607	118	2.42482	154	5.23284	94	4.01456	212	6.54402
TRINITY_DN7167_c0_g3	1	0.504199	5	2.04768	5	2.38138	0	0	1	0.509453	3	0.805814	0	0	0	0	0	0
TRINITY_DN7167_c0_g2	1	0.363456	6	1.7761	2	0.69142	3	0.89782	1	0.358131	0	0	1	0.299201	0	0	0	0
TRINITY_DN7167_c0_g1	1	0.320654	6	1.57065	2	0.612339	1	0.263625	0	0	1	0.168547	1	0.265338	1	0.347708	2	0.462587
TRINITY_DN6839_c0_g1	0	0	0	0	0	0	0	0	0	0	0	0	0	0	0	0	3	3.87382
TRINITY_DN6839_c0_g2	0	0	0	0	0	0	0	0	0	0	0	0	0	0	0	0	3	3.51856
TRINITY_DN24816_c0_g1	0	0	0	0	0	0	0	0	0	0	0	0	0	0	0	0	2	2.30611
TRINITY_DN15044_c0_g1	1	0.692255	0	0	0	0	0	0	0	0	3	1.13237	1	0.561814	0	0	1	0.460541
TRINITY_DN20173_c0_g1	2	3.15554	0	0	0	0	0	0	0	0	0	0	0	0	0	0	7	6.82886
TRINITY_DN26827_c0_g1	0	0	0	0	0	0	0	0	0	0	0	0	0	0	0	0	2	4.11054
TRINITY_DN13727_c0_g4	7	1.27475	6	0.833042	13	1.82647	11	1.30122	4	0.553347	14	1.05599	24	3.35051	15	2.34496	10	1.09469
TRINITY_DN26345_c0_g1	0	0	1	0.326608	3	1.14289	1	0.331385	0	0	2	0.424183	1	0.329315	1	0.436726	0	0
TRINITY_DN18376_c0_g1	0	0	7	8.69663	5	7.1513	1	1.31741	0	0	4	3.31017	0	0	1	1.7154	0	0
TRINITY_DN24464_c0_g1	0	0	0	0	0	0	0	0	0	0	0	0	0	0	0	0	4	4.05564
TRINITY_DN25848_c0_g1	0	0	0	0	0	0	0	0	0	0	0	0	0	0	1	1.28348	5	3.46464
TRINITY_DN16534_c0_g1	0	0	0	0	0	0	0	0	0	0	0	0	0	0	0	0	2	3.96996
TRINITY_DN15034_c0_g1	0	0	0	0	0	0	2	4.27236	1	2.61847	1	1.30681	0	0	0	0	0	0
TRINITY_DN23388_c0_g1	0	0	0	0	1	2.55541	1	2.32363	0	0	0	0	2	4.08918	0	0	0	0
TRINITY_DN13932_c9_g1	2	4.34446	0	0	0	0	0	0	0	0	0	0	0	0	0	0	0	0
TRINITY_DN14163_c0_g2	19165	874.439	24276	945.663	15563	633.75	8887.36	200.245	12506	320.857	13321	191.125	17549	418.737	8286	223.957	8209	142.901
TRINITY_DN14163_c0_g3	29.0508	4.0907	25.0727	2.91908	57.2437	7.84553	19	2.19149	24.0957	3.24894	33.1093	2.43493	88	10.5116	38	5.79257	19.1524	2.04655
TRINITY_DN14163_c0_g1	4238.95	76.9126	5104.92	77.7827	4998.76	89.6324	2277	34.6894	1922.9	30.7003	2129.89	19.8402	3057	42.9045	1140	20.1659	1178.85	16.1665
TRINITY_DN3375_c0_g1	6	0.859457	11	1.3358	0	0	19	2.46282	3	0.467432	5	0.399987	6	0.768678	2	0.35143	1	0.122392
TRINITY_DN14351_c0_g1	0	0	1	0.445784	2	1.03568	0	0	1	0.558998	3	0.880463	0	0	0	0	0	0
TRINITY_DN13689_c0_g1	527	11.5448	654	12.6416	891	18.8028	343	5.84482	402	8.63515	634.001	7.69036	885	16.0065	509	13.1031	332	6.13938
TRINITY_DN13689_c0_g2	16	0.887549	11	0.507668	45	2.45261	26	1.17952	40	2.10282	18	0.52	125	5.95425	30	1.80045	17	0.733811
TRINITY_DN11201_c0_g1	1996	164.502	1954	134.526	2956	240.201	1126	76.2758	156	12.2408	678	29.2642	270	19.0748	121	10.8562	180	11.5432
TRINITY_DN11795_c0_g1	257	10.396	302	10.172	614	24.4362	155	5.10689	116	4.44796	273	5.75997	736	25.6502	269	11.7953	85	2.69299
TRINITY_DN22163_c0_g1	0	0	0	0	0	0	0	0	0	0	0	0	0	0	0	0	2	3.75417
TRINITY_DN14165_c3_g1	701	43.9779	915	47.7253	1345	82.6222	548	28.1391	435	25.8851	499	16.2862	1157	62.2509	682	46.2481	785	38.2577
TRINITY_DN14113_c1_g2	51438	3264.6	55034	2948.6	25355	1286.62	47583	2537.16	11295	731.078	30439	1055.99	6271	236.218	6400	370.951	11215	390.785
TRINITY_DN14165_c3_g3	1218	59.1052	1713	69.1992	1758	83.8709	834	33.0753	778	35.7278	1312	33.1392	1673	69.7598	1417	74.3795	1197	45.2756
TRINITY_DN14165_c3_g2	2126	121.262	2112	100.165	2699	151.279	2562	119.459	3686	199.214	4499	133.623	4116	202.038	2841	175.24	3233	143.038
TRINITY_DN22582_c0_g1	0	0	0	0	0	0	0	0	0	0	0	0	0	0	0	0	3	5.57021
TRINITY_DN9013_c0_g1	12	0.96745	11	0.736468	26	2.05378	18	1.18736	1	0.0766365	15	0.63032	48	3.31104	28	2.44269	18	1.12083
TRINITY_DN4455_c0_g1	7	0.854262	6	0.606238	17	2.02345	0	0	3	0.349771	2	0.127393	2	0.2076	2	0.264188	1	0.0931167
TRINITY_DN11563_c0_g1	9682	313.845	8992	243.269	11891	380.06	4173	110.457	72	2.22968	1914	32.232	235	6.82172	130	4.53279	181	4.61512
TRINITY_DN18351_c0_g1	12	1.40653	4	0.388312	15	1.7157	1	0.0959676	0	0	1	0.0611677	1	0.0997637	0	0	0	0
TRINITY_DN2614_c0_g1	3	0.325292	12	1.07836	15	1.58871	5	0.44382	0	0	5	0.282844	8	0.739247	3	0.352064	4	0.332258
TRINITY_DN2614_c0_g2	1	0.629761	0	0	1	0.596247	1	0.53254	0	0	0	0	5	2.55505	1	0.7007	0	0
TRINITY_DN884_c0_g1	0	0	0	0	0	0	3	2.93965	2	2.43614	2	1.24105	2	1.78587	2	2.56695	5	3.46464
TRINITY_DN13114_c0_g1	25	3.41859	26.0001	3.01882	18	2.4139	28	3.05305	19	2.55684	41.9999	2.95531	29	3.49002	9	1.30743	11	1.18488
TRINITY_DN13114_c0_g3	2	1.16784	0	0	6	3.31204	2	0.981339	3	1.80022	4	1.25603	2	0.94795	0	0	0	0
TRINITY_DN13114_c0_g2	587	45.1209	849	53.9204	713	53.7764	665	41.9865	2107	153.018	1191	47.1546	1490	96.6986	1281	105.788	2014	118.513
TRINITY_DN4401_c0_g1	634	15.3212	544	10.9627	1358	32.3561	375	7.40707	708	16.1536	553	6.9524	1391	28.9959	577	15.0824	546	10.3641
TRINITY_DN11616_c0_g1	2	4.83058	0	0	0	0	0	0	0	0	0	0	0	0	2	5.75345	0	0
TRINITY_DN12723_c1_g1	28	2.98685	35	3.21983	25	2.70549	50	4.33717	6	0.602442	39	2.19907	21	1.96216	10	1.17274	38	3.06847
TRINITY_DN27952_c0_g1	0	0	0	0	0	0	0	0	0	0	0	0	0	0	0	0	2	3.83805
TRINITY_DN27872_c0_g1	1	2.91867	0	0	0	0	0	0	0	0	0	0	0	0	0	0	1	1.77789
TRINITY_DN6585_c0_g1	28	1.30932	35	1.36254	59	2.71332	21	0.802967	33	1.46088	44	1.0712	62	2.49269	16	0.809408	8	0.291856
TRINITY_DN1989_c0_g1	3	1.86369	1	0.507047	1	0.587983	1	0.524692	0	0	0	0	0	0	2	1.38079	5	2.09132
TRINITY_DN20134_c0_g1	0	0	0	0	0	0	3	7.23041	1	2.93536	0	0	0	0	1	3.05504	1	1.57297
TRINITY_DN14178_c0_g3	0	0	0	0	0	0	0	0	0	0	0	0	0	0	1	2.29537	0	0
TRINITY_DN14178_c0_g1	8823	183.157	6243	108.092	9722	199.046	5244	88.7281	1038	20.3096	2408	25.9486	2709	48.5309	2143	48.0554	4250	69.3202
TRINITY_DN26199_c0_g1	0	0	0	0	0	0	9	2.49542	1	0.330864	10	1.77314	0	0	2	0.731291	4	0.968266
TRINITY_DN18592_c0_g1	0	0	0	0	0	0	0	0	0	0	0	0	0	0	0	0	2	3.55578
TRINITY_DN11125_c1_g1	1	0.356236	0	0	0	0	1	0.293242	0	0	0	0	0	0	1	0.386634	16	4.07228
TRINITY_DN11125_c1_g2	0	0	0	0	0	0	0	0	0	0	0	0	0	0	0	0	9	5.75008
TRINITY_DN8432_c0_g1	18	3.0544	16	2.2278	7	1.19163	6	0.863406	5	0.805946	7	0.642597	1	0.148199	6	1.14063	1	0.131898
TRINITY_DN8432_c0_g3	12	0.788256	13	0.709934	9	0.580203	7	0.37612	10	0.62329	33	1.12929	15	0.844858	2	0.142146	2	0.10192
TRINITY_DN7935_c0_g1	135	10.1842	113	7.1343	44	3.31397	159	9.96388	39	2.82172	171	6.73535	112	7.36731	54	4.48978	71	4.21837
TRINITY_DN24214_c0_g1	0	0	0	0	0	0	0	0	0	0	0	0	0	0	2	4.4357	0	0
TRINITY_DN13927_c3_g2	3044	459.08	5249	655.125	4151	609.553	17805	2182.38	12507	1772.65	25171	1965.02	26095	3332.32	19006	3104.72	28173	3213.98
TRINITY_DN13927_c3_g1	2079	141.571	1846	104.487	2955	197.429	2985	166.274	92	5.94617	1155	40.9771	879	51.3055	527	38.8288	438	23.122
TRINITY_DN17251_c0_g1	0	0	1	2.00686	1	2.32	0	0	0	0	1	1.29551	0	0	0	0	0	0
TRINITY_DN5498_c0_g1	2	5.12069	0	0	0	0	1	2.38838	0	0	1	1.45101	0	0	0	0	3	4.67311
TRINITY_DN16402_c0_g1	0	0	0	0	0	0	3	4.8837	0	0	0	0	0	0	0	0	0	0
TRINITY_DN21544_c0_g1	1	2.88833	0	0	0	0	0	0	0	0	0	0	0	0	0	0	1	1.75917
TRINITY_DN12093_c0_g1	604	76.1969	731	74.8572	509	61.3806	311	32.0407	80	9.82259	372	24.3135	19	1.9803	14	1.85447	30	2.8556
TRINITY_DN17345_c0_g1	3	6.96743	0	0	1	2.38689	1	2.17553	0	0	0	0	0	0	1	2.77791	0	0
TRINITY_DN13287_c0_g1	1694	46.0432	1258	28.4754	1269	34.102	4166	92.7185	12008	318.731	9827	139.514	2651	63.7778	1604	47.4549	1545	33.1868
TRINITY_DN22689_c0_g1	0	0	0	0	0	0	0	0	0	0	0	0	0	0	1	3.64675	2	3.88136
TRINITY_DN8810_c0_g1	22	2.30322	17	1.4754	64	6.54745	4	0.342789	1	0.0998083	4	0.218446	20	1.78534	5	0.566525	2	0.160577
TRINITY_DN17400_c0_g1	1	3.0811	1	2.67914	2	6.28598	0	0	0	0	1	1.70133	0	0	0	0	0	0
TRINITY_DN4955_c0_g1	4	9.8529	0	0	0	0	0	0	0	0	0	0	2	4.05142	0	0	0	0
TRINITY_DN17659_c0_g1	0	0	0	0	0	0	0	0	0	0	0	0	0	0	0	0	3	5.63126
TRINITY_DN14313_c1_g4	9	14.1999	0	0	3	4.78464	3	4.40511	0	0	0	0	1.00099	1.30522	0	0	0	0
TRINITY_DN14313_c1_g2	85512	1140.37	101643	1090.19	114683	1386.17	99083	1197.85	129930	2583.19	75161	623.044	150675	3286.18	57973	812.377	53162	647.526
TRINITY_DN14313_c1_g3	26521.1	463.874	31447	477.69	19525	340.242	6710	78.7675	9209.02	109.106	23411.7	154.243	17503.5	188.476	8867	119.94	8774.86	86.9193
TRINITY_DN14313_c1_g1	3982	62.3565	4452	58.0926	3759	58.067	3057.99	38.2943	1703	24.5066	3738.01	29.973	3652	48.165	1760	29.2973	1346	15.9328
TRINITY_DN4423_c0_g2	1	2.46322	0	0	0	0	0	0	0	0	0	0	1	2.02571	0	0	0	0
TRINITY_DN4423_c0_g1	0	0	0	0	1	2.04913	0	0	0	0	2	2.31883	0	0	0	0	0	0
TRINITY_DN6502_c0_g1	14	0.878378	5	0.260859	27	1.66307	11	0.564502	12	0.714142	27.0001	0.878751	51	2.74482	23	1.56131	12	0.577375
TRINITY_DN11938_c0_g1	2605	59.6373	3298	63.1564	3442	72.9247	4163	75.2268	5049	104.689	5851	68.2545	4170	76.4838	2894	70.8161	2920.99	50.055
TRINITY_DN11938_c0_g3	2630	98.3371	3241	100.954	4047	148.965	2442	74.646	2590	91.5394	4714	91.7233	6357	204.64	4640	187.656	3857	112.829
TRINITY_DN9380_c0_g1	74	3.3791	186	7.07147	228	10.2405	350	13.0683	137	5.92169	646	15.3574	2334	91.6491	1000	49.3999	692	24.6609
TRINITY_DN3899_c0_g1	3	2.56359	4	2.84163	0	0	0	0	7	6.47398	0	0	0	0	0	0	3	1.66749
TRINITY_DN14260_c4_g4	0	0	0	0	0	0	0	0	0	0	1	1.27324	0	0	4	4.20441	0	0
TRINITY_DN13213_c0_g1	20	0.893457	30	1.17101	20	0.856074	21	0.750325	73.9999	3.26454	99	2.18653	72	2.72665	39	1.9735	49	1.6753
TRINITY_DN14260_c4_g3	1	0.635611	0	0	0	0	0	0	0	0	0	0	14	7.22005	0	0	0	0
TRINITY_DN14260_c4_g1	23.7016	10.8576	10	3.37887	2	3.60099	11	6.5456	22.3198	10.9241	15	3.43866	48	23.4796	9	6.79235	16	6.1337
TRINITY_DN9023_c0_g1	563	37.9229	1440	80.629	489	32.3201	1277	70.3623	339	21.6713	586	20.5646	414	23.9054	340	24.7796	365	19.064
TRINITY_DN531_c0_g1	0	0	0	0	0	0	1	0.95877	0	0	2	1.21495	3	2.62562	0	0	0	0
TRINITY_DN10183_c0_g1	203	13.8918	191	10.8642	254	17.0536	73	4.08648	47	3.05287	167	5.95422	29	1.70097	8	0.59235	22	1.16701
TRINITY_DN23813_c0_g1	4	8.60599	0	0	0	0	0	0	0	0	0	0	0	0	0	0	0	0
TRINITY_DN1351_c0_g1	0	0	0	0	0	0	0	0	0	0	0	0	0	0	0	0	10	8.68367
TRINITY_DN24332_c0_g1	3	6.33455	1	1.87849	0	0	0	0	0	0	0	0	0	0	0	0	0	0
TRINITY_DN11504_c0_g1	39	2.5848	70.9999	3.69835	30	1.88049	33	1.70342	12	0.710781	20	0.651441	157	12.6868	40	3.20777	15	0.73256
TRINITY_DN17649_c0_g1	0	0	0	0	0	0	0	0	0	0	0	0	0	0	2	4.4357	0	0
TRINITY_DN24853_c0_g1	0	0	0	0	0	0	0	0	0	0	0	0	0	0	0	0	3	4.67311
TRINITY_DN14447_c0_g1	0	0	0	0	0	0	0	0	4	12.6943	0	0	0	0	0	0	0	0
[truncated: 27,249 more rows]
