# Supplementary material for: The Response of Growth and Transcriptome Profiles of Tea Grey Blight Disease Pathogen Pestalotiopsis theae to the Variation of Exogenous L-Theanine
Source: Int J Mol Sci. 2024 Mar 20;25(6):3493. doi: 10.3390/ijms25063493 (PMC10971465; doi:10.3390/ijms25063493)
Supplement: Supplementary file 1 [file ijms-25-03493-s001.zip › ijms-2863686-supplementary/Supplemental Table S3.xlsx]

## Sheet: Th2 vs. Th0 
Table S3. DEGs of Th2 vs. Th0 comparison group
Gene id	MeanTPM (Th2)	MeanTPM (Th0)	log2FoldChange	p_Value	QValue	result	CDD	PFAM	KEGG	KOG	Swissprot	GO	NR	NT
TRINITY_DN25817_c0_g1	0.0001	51.7154	-18.9802	7.14859e-08	2.3004e-06	down	-	-	-	-	-	-	-	-
TRINITY_DN14670_c0_g1	0.0001	22.1205	-17.755	3.4862e-07	9.33651e-06	down	-	-	-	-	-	-	-	-
TRINITY_DN10802_c0_g1	0.0001	11.817	-16.8505	1.84036e-13	1.98244e-11	down	-	-	-	-	sp|D4ALG0|LYSM1_ARTBC LysM domain-containing protein ARB_05157 OS=Arthroderma benhamiae (strain ATCC MYA-4681 / CBS 112371) GN=ARB_05157 PE=1 SV=1 3.05e-30	-	-	-
TRINITY_DN9407_c0_g2	0.0001	10.7411	-16.7128	3.49376e-07	9.33651e-06	down	cd17323, MFS_Tpo1_MDR_like, Yeast Polyamine transporter 1 (Tpo1) and similar multidrug resistance (MDR) transporters of the Major Facilitator Superfamily. This family is composed of fungal multidrug resistance (MDR) transporters including several proteins from Saccharomyces cerevisiae such as polyamine transporters 1-4 (Tpo1-4), quinidine resistance proteins 1-3 (Qdr1-3), dityrosine transporter 1…	-	-	KOG0255, KOG0255, KOG0255, Synaptic vesicle transporter SVOP and related transporters (major facilitator superfamily) [General function prediction only]. 5.83e-06	sp|P38124|FLR1_YEAST Fluconazole resistance protein 1 OS=Saccharomyces cerevisiae (strain ATCC 204508 / S288c) GN=FLR1 PE=1 SV=1 1.22e-16	-	-	-
TRINITY_DN2438_c0_g1	0.0001	9.38548	-16.5181	1.39668e-05	0.000240558	down	-	-	-	-	-	-	-	-
TRINITY_DN16570_c0_g1	0.0001	7.75634	-16.2431	0.00274015	0.0183027	down	-	-	-	-	-	-	-	-
TRINITY_DN20836_c0_g1	0.0001	6.71204	-16.0345	1.59981e-09	7.85144e-08	down	-	-	-	-	-	-	-	-
TRINITY_DN9792_c0_g1	0.0001	6.13941	-15.9058	0.00922953	0.0460607	down	-	-	-	-	-	-	-	-
TRINITY_DN1421_c0_g1	0.0001	5.29141	-15.6914	0.000544975	0.00516568	down	-	-	-	-	-	-	-	-
TRINITY_DN8114_c0_g1	0.0001	4.46838	-15.4475	1.91108e-05	0.000313441	down	-	-	-	-	-	-	-	-
TRINITY_DN3305_c0_g1	0.0001	2.94716	-14.847	9.08926e-06	0.000166475	down	-	pfam00909, Ammonium_transp, Ammonium Transporter Family. 4.69e-37	-	KOG0682, KOG0682, KOG0682, Ammonia permease [Inorganic ion transport and metabolism]. 1.29e-47	sp|Q9C0V1|AMT1_SCHPO Ammonium transporter 1 OS=Schizosaccharomyces pombe (strain 972 / ATCC 24843) GN=amt1 PE=3 SV=1 3.04e-56	-	XP_021955133.1 ammonium transporter 1 [Folsomia candida] >XP_035709814.1 ammonium transporter 1 [Folsomia candida] >OXA52020.1 Ammonium transporter 1 [Folsomia candida] 5.49e-71	-
TRINITY_DN26714_c0_g1	0.0001	2.89289	-14.8202	0.00132907	0.0104154	down	-	pfam13520, AA_permease_2, Amino acid permease. 3.30e-11	-	KOG1289, KOG1289, KOG1289, Amino acid transporters [Amino acid transport and metabolism]. 5.03e-20	sp|O60113|YG64_SCHPO Uncharacterized amino-acid permease C15C4.04c OS=Schizosaccharomyces pombe (strain 972 / ATCC 24843) GN=SPBC15C4.04c PE=3 SV=1 2.60e-19	-	CAF1499615.1 unnamed protein product, partial [Adineta steineri] 5.58e-17	-
TRINITY_DN8789_c0_g1	0.0001	2.52777	-14.6256	0.000906942	0.00765989	down	-	-	-	-	-	-	-	-
TRINITY_DN16937_c0_g1	0.0001	2.21194	-14.433	0.00949185	0.0469984	down	-	-	-	-	-	-	-	-
TRINITY_DN16026_c0_g1	0.0001	1.91704	-14.2266	0.000152519	0.00180007	down	cd11058, CYP60B-like, cytochrome P450 family 60, subfamily B and similar cytochrome P450s. This family is composed of fungal cytochrome P450s including: Aspergillus nidulans cytochrome P450 60B (CYP60B), also called versicolorin B desaturase, which catalyzes the conversion of versicolorin B to versicolorin A during sterigmatocystin biosynthesis; Fusarium sporotrichioides cytochrome P450 65A1 (CYP…	pfam00067, p450, Cytochrome P450. Cytochrome P450s are haem-thiolate proteins involved in the oxidative degradation of various compounds. They are particularly well known for their role in the degradation of environmental toxins and mutagens. They can be divided into 4 classes, according to the method by which electrons from NAD(P)H are delivered to the catalytic site. Sequence conservation is re…	-	KOG0158, KOG0158, KOG0158, Cytochrome P450 CYP3/CYP5/CYP6/CYP9 subfamilies [Secondary metabolites biosynthesis, transport and catabolism]. 1.39e-20	sp|Q12609|STCF_EMENI Probable sterigmatocystin biosynthesis P450 monooxygenase stcF OS=Emericella nidulans (strain FGSC A4 / ATCC 38163 / CBS 112.46 / NRRL 194 / M139) GN=stcF PE=3 SV=3 4.06e-57	-	XP_043969078.1 cytochrome P450 3A56-like [Gambusia affinis] 4.90e-17	-
TRINITY_DN6508_c0_g1	0.0001	1.81937	-14.1512	0.000945819	0.00791462	down	-	-	-	-	sp|D4B4P8|LYSM2_ARTBC LysM domain-containing protein ARB_03438 OS=Arthroderma benhamiae (strain ATCC MYA-4681 / CBS 112371) GN=ARB_03438 PE=3 SV=1 1.00e-12	-	-	-
TRINITY_DN14392_c0_g1	0.0001	1.68588	-14.0412	0.00202674	0.0144163	down	-	-	-	-	-	-	-	-
TRINITY_DN6909_c0_g2	0.0001	1.5787	-13.9464	0.00532566	0.0304518	down	-	-	-	KOG1231, KOG1231, KOG1231, Proteins containing the FAD binding domain [Energy production and conversion]. 3.32e-07	sp|Q4WZ61|EASE_ASPFU FAD-linked oxidoreductase easE OS=Neosartorya fumigata (strain ATCC MYA-4609 / Af293 / CBS 101355 / FGSC A1100) GN=easE PE=2 SV=1 7.24e-25	-	CAF4168174.1 unnamed protein product, partial [Rotaria sordida] 1.05e-24	-
TRINITY_DN3454_c0_g1	0.0001	1.37157	-13.7435	0.006814	0.0366382	down	-	-	-	-	-	-	-	-
TRINITY_DN5450_c0_g1	0.0001	1.2683	-13.6306	0.0041017	0.0248507	down	-	-	-	-	-	-	-	-
TRINITY_DN6763_c0_g2	0.0001	1.17137	-13.5159	0.00154088	0.0117846	down	-	-	-	KOG1303, KOG1303, KOG1303, Amino acid transporters [Amino acid transport and metabolism]. 2.89e-10	sp|P38680|MTR_NEUCR N amino acid transport system protein OS=Neurospora crassa (strain ATCC 24698 / 74-OR23-1A / CBS 708.71 / DSM 1257 / FGSC 987) GN=mtr PE=3 SV=2 4.61e-27	-	-	-
TRINITY_DN25902_c0_g1	0.0001	1.10661	-13.4339	0.00311969	0.0201803	down	-	-	-	-	-	-	-	-
TRINITY_DN14315_c0_g3	0.212806	197.551	-9.85847	4.66741e-13	4.56365e-11	down	-	-	-	-	-	-	KAF4513756.1 hypothetical protein B566_EDAN011676 [Ephemera danica] 9.38e-12	Mus musculus clone 104 dsRNA sequence 1.73e-68
TRINITY_DN11271_c0_g1	0.19307	103.812	-9.07063	4.50256e-31	6.35911e-28	down	-	pfam11807, DUF3328, Domain of unknown function (DUF3328). This family of proteins are functionally uncharacterized. This family is only found in eukaryotes. 1.70e-26	-	-	-	-	-	-
TRINITY_DN11150_c0_g1	0.141595	62.1243	-8.77724	1.96917e-16	3.4764e-14	down	-	pfam11807, DUF3328, Domain of unknown function (DUF3328). This family of proteins are functionally uncharacterized. This family is only found in eukaryotes. 9.28e-06	-	-	-	-	-	-
TRINITY_DN23722_c0_g1	0.0767743	29.1708	-8.56968	1.16291e-09	5.86579e-08	down	-	pfam11807, DUF3328, Domain of unknown function (DUF3328). This family of proteins are functionally uncharacterized. This family is only found in eukaryotes. 2.09e-08	-	-	-	-	-	-
TRINITY_DN998_c0_g1	0.0145259	3.20932	-7.78749	2.89156e-06	6.06511e-05	down	cd00312, Esterase_lipase, Esterases and lipases (includes fungal lipases, cholinesterases, etc.) These enzymes act on carboxylic esters (EC: 3.1.1.-). The catalytic apparatus involves three residues (catalytic triad): a serine, a glutamate or aspartate and a histidine.These catalytic residues are responsible for the nucleophilic attack on the carbonyl carbon atom of the ester bond. In contrast wi…	pfam00135, COesterase, Carboxylesterase family. 8.17e-41	-	KOG4389, KOG4389, KOG4389, Acetylcholinesterase/Butyrylcholinesterase [Signal transduction mechanisms]. 1.05e-38	sp|P37136|ACES_RAT Acetylcholinesterase OS=Rattus norvegicus GN=Ache PE=2 SV=1 1.05e-39	-	XP_048345603.1 cholinesterase-like [Sphaerodactylus townsendi] 1.57e-41	-
TRINITY_DN2612_c0_g1	0.0429203	8.51614	-7.6324	4.97624e-08	1.67336e-06	down	-	-	-	-	-	-	-	-
TRINITY_DN9973_c0_g1	0.49998	82.3858	-7.36438	1.23594e-18	3.0804e-16	down	-	pfam11807, DUF3328, Domain of unknown function (DUF3328). This family of proteins are functionally uncharacterized. This family is only found in eukaryotes. 3.25e-16	-	-	-	-	-	-
TRINITY_DN14256_c1_g3	0.93197	136.74	-7.19694	8.42022e-07	2.07421e-05	down	-	-	-	-	-	-	CAE1292283.1 unnamed protein product [Sepia pharaonis] 1.63e-07	Zebrafish DNA sequence from clone RP71-42C1, complete sequence 1.86e-45
TRINITY_DN10903_c0_g1	0.0351393	4.62244	-7.03942	9.75871e-06	0.000176314	down	-	pfam11807, DUF3328, Domain of unknown function (DUF3328). This family of proteins are functionally uncharacterized. This family is only found in eukaryotes. 6.94e-19	-	-	-	-	-	-
TRINITY_DN14091_c5_g1	0.73099	94.8872	-7.02022	1.2163e-13	1.36817e-11	down	-	-	-	-	-	-	-	-
TRINITY_DN4460_c0_g1	0.079283	9.47524	-6.90101	4.83049e-09	2.09557e-07	down	-	-	-	-	-	-	-	-
TRINITY_DN23556_c0_g1	0.0660881	6.773	-6.67926	5.76141e-08	1.90216e-06	down	-	-	-	-	-	-	-	-
TRINITY_DN22019_c0_g1	0.051229	5.16389	-6.65535	3.48343e-05	0.000519084	down	-	-	-	-	-	-	-	-
TRINITY_DN1015_c0_g1	0.47277	45.5739	-6.59092	1.98415e-20	6.81637e-18	down	-	-	-	-	-	-	-	-
TRINITY_DN1131_c0_g1	5.95539	535.226	-6.48981	3.3859e-15	4.94691e-13	down	-	pfam09994, DUF2235, Uncharacterized alpha/beta hydrolase domain (DUF2235). This domain, found in various hypothetical bacterial proteins, has no known function. 2.39e-59	-	-	sp|P39992|YEC3_YEAST Uncharacterized protein YEL023C OS=Saccharomyces cerevisiae (strain ATCC 204508 / S288c) GN=YEL023C PE=4 SV=1 2.33e-16	-	KAJ3017355.1 hypothetical protein HDU68_011738 [Siphonaria sp. JEL0065] 5.96e-23	-
TRINITY_DN1554_c0_g1	0.0272877	2.40494	-6.46161	2.07397e-05	0.000333278	down	-	-	K00231-ko00860 Porphyrin and chlorophyll metabolism	KOG1276, KOG1276, KOG1276, Protoporphyrinogen oxidase [Coenzyme transport and metabolism]. 2.71e-18	sp|Q10062|PPOX_SCHPO Protoporphyrinogen oxidase OS=Schizosaccharomyces pombe (strain 972 / ATCC 24843) GN=hem14 PE=3 SV=1 3.52e-22	GO:0003674, molecular_function;GO:0003824, catalytic activity;GO:0004729, oxygen-dependent protoporphyrinogen oxidase activity;GO:0005575, cellular_component;GO:0005622, intracellular;GO:0005623, cell;GO:0005737, cytoplasm;GO:0005739, mitochondrion;GO:0005740, mitochondrial envelope;GO:0005743, mitochondrial inner membrane;GO:0006725, cellular aromatic compound metabolic process;GO:0006778, porph…	KAJ3023505.1 oxygen-dependent protoporphyrinogen oxidase [Siphonaria sp. JEL0065] 6.77e-27	-
TRINITY_DN6413_c0_g1	0.0597098	5.07496	-6.40929	7.174e-07	1.80612e-05	down	-	-	-	-	-	-	-	-
TRINITY_DN21281_c0_g1	0.0403247	3.18337	-6.30275	0.00204348	0.0144948	down	-	-	-	-	-	-	-	-
TRINITY_DN11072_c0_g1	1.89783	136.556	-6.169	1.25757e-34	4.43346e-31	down	cd17502, MFS_Azr1_MDR_like, Saccharomyces cerevisiae Azole resistance protein 1 (Azr1p), and similar multidrug resistance (MDR) transporters of the Major Facilitator Superfamily. This subfamily is composed of multidrug resistance (MDR) transporters including various Saccharomyces cerevisiae proteins such as azole resistance protein 1 (Azr1p), vacuolar basic amino acid transporter 1 (Vba1p), vacuo…	-	-	-	sp|B6HJU0|ROQT_PENRW Efflux pump roqT OS=Penicillium rubens (strain ATCC 28089 / DSM 1075 / NRRL 1951 / Wisconsin 54-1255) GN=roqT PE=1 SV=1 2.35e-93	-	KAJ3010587.1 hypothetical protein HDU68_002075 [Siphonaria sp. JEL0065] 1.64e-29	-
TRINITY_DN7343_c0_g2	0.0279533	2.00878	-6.16716	0.000157445	0.00185094	down	-	-	-	-	-	-	-	-
TRINITY_DN14362_c0_g1	1.16236	79.1923	-6.09024	6.74631e-18	1.45343e-15	down	cd21175, LPMO_AA9, lytic polysaccharide monooxygenase (LPMO) auxiliary activity family 9 (AA9). AA9 proteins are copper-dependent lytic polysaccharide monooxygenases (LPMOs) involved in the cleavage of cellulose chains with oxidation of carbons C1 and/or C4 and C6. Activities include lytic cellulose monooxygenase (C1-hydroxylating) (EC 1.14.99.54) and lytic cellulose monooxygenase (C4-dehydrogena…	pfam03443, Glyco_hydro_61, Glycosyl hydrolase family 61. Although weak endoglucanase activity has been demonstrated in several members of this family, they lack the clustered conserved catalytic acidic amino acids present in most glycoside hydrolases. Many members of this family lack measurable cellulase activity on their own, but enhance the activity of other cellulolytic enzymes. They are there…	K19356-ko00500 Starch and sucrose metabolism	-	sp|G2Q9T3|CEL61_MYCTT Polysaccharide monooxygenase Cel61a OS=Myceliophthora thermophila (strain ATCC 42464 / BCRC 31852 / DSM 1799) GN=Cel61a PE=1 SV=1 1.05e-94	-	CAF0965746.1 unnamed protein product [Adineta steineri] >CAF4136179.1 unnamed protein product [Adineta steineri] 3.27e-10	-
TRINITY_DN10186_c0_g1	0.591603	40.1565	-6.08486	2.25957e-22	1.14885e-19	down	cd06097, Aspergillopepsin_like, Aspergillopepsin_like, aspartic proteases of fungal origin. The members of this family are aspartic proteases of fungal origin, including aspergillopepsin, rhizopuspepsin, endothiapepsin, and rodosporapepsin. The various fungal species in this family may be the most economically important genus of fungi. They may serve as virulence factors or as industrial aids. Fo…	pfam00026, Asp, Eukaryotic aspartyl protease. Aspartyl (acid) proteases include pepsins, cathepsins, and renins. Two-domain structure, probably arising from ancestral duplication. This family does not include the retroviral nor retrotransposon proteases (pfam00077), which are much smaller and appear to be homologous to a single domain of the eukaryotic asp proteases. 2.75e-38	-	KOG1339, KOG1339, KOG1339, Aspartyl protease [Posttranslational modification, protein turnover, chaperones]. 2.40e-13	sp|Q06902|PEPA_ASPOR Aspartic protease pep1 OS=Aspergillus oryzae (strain ATCC 42149 / RIB 40) GN=pep1 PE=1 SV=2 6.91e-74	-	CAF3513755.1 unnamed protein product [Rotaria socialis] 4.69e-32	-
TRINITY_DN8508_c0_g1	0.0332918	2.24657	-6.07642	0.00350613	0.0220626	down	-	-	-	-	-	-	-	-
TRINITY_DN12261_c0_g1	0.637393	42.5243	-6.05996	9.42115e-16	1.47683e-13	down	-	pfam06985, HET, Heterokaryon incompatibility protein (HET). This family represents a conserved region approximately 150 residues long within various heterokaryon incompatibility proteins that seem to be restricted to ascomycete fungi. Genetic differences in specific het genes prevent a viable heterokaryotic fungal cell from being formed by the fusion of filaments from two different wild-type stra…	-	-	-	-	KAI1693513.1 heterokaryon incompatibility protein (HET) domain-containing protein [Ditylenchus destructor] 5.00e-31	-
TRINITY_DN13254_c0_g1	0.375907	23.8095	-5.98502	1.77728e-17	3.64371e-15	down	-	-	-	-	-	-	-	-
TRINITY_DN10031_c0_g1	0.0420217	2.66111	-5.98475	0.000855741	0.00735798	down	-	-	K01044-ko00983 Drug metabolism - other enzymes	-	-	-	CAF1275615.1 unnamed protein product [Rotaria magnacalcarata] >CAF1929105.1 unnamed protein product [Rotaria magnacalcarata] >CAF4006044.1 unnamed protein product [Rotaria magnacalcarata] >CAF4054264.1 unnamed protein product [Rotaria magnacalcarata] 4.11e-22	-
TRINITY_DN4307_c0_g1	0.0373132	2.35313	-5.97875	3.77359e-05	0.000555807	down	cd07216, Pat17_PNPLA8_PNPLA9_like3, Patatin-like phospholipase. Patatin is a storage protein of the potato tuber that shows Phospholipase A2 activity (PLA2; EC 3.1.1.4). Patatin catalyzes the nonspecific hydrolysis of phospholipids, glycolipids, sulfolipids, and mono- and diacylglycerols, thereby showing lipid acyl hydrolase activity. The active site includes an oxyanion hole with a conserved GGx…	-	-	KOG4231, KOG4231, KOG4231, Intracellular membrane-bound Ca2+-independent phospholipase A2 [Lipid transport and metabolism]. 1.22e-22	sp|Q9NP80|PLPL8_HUMAN Calcium-independent phospholipase A2-gamma OS=Homo sapiens GN=PNPLA8 PE=1 SV=1 6.07e-26	-	ROT85468.1 Calcium-independent phospholipase A2-gamma [Penaeus vannamei] 1.62e-24	-
TRINITY_DN2717_c0_g1	0.0876117	5.29764	-5.91808	2.55515e-07	7.06055e-06	down	-	pfam01822, WSC, WSC domain. This domain may be involved in carbohydrate binding. 2.23e-08	-	-	-	GO:0000322, storage vacuole;GO:0000323, lytic vacuole;GO:0000324, fungal-type vacuole;GO:0003674, molecular_function;GO:0004888, transmembrane signaling receptor activity;GO:0005575, cellular_component;GO:0005622, intracellular;GO:0005623, cell;GO:0005737, cytoplasm;GO:0005773, vacuole;GO:0005933, cellular bud;GO:0005937, mating projection;GO:0006914, autophagy;GO:0006950, response to stress;GO:0…	BAN21472.1 unkown protein, partial [Riptortus pedestris] 5.08e-07	-
TRINITY_DN8293_c0_g1	4.52308	266.799	-5.88231	8.64117e-18	1.83063e-15	down	cd03505, Delta9-FADS-like, The Delta9 Fatty Acid Desaturase (Delta9-FADS)-like CD includes the delta-9 and delta-11 acyl CoA desaturases found in various eukaryotes including vertebrates, insects, higher plants, and fungi. The delta-9 acyl-lipid desaturases are found in a wide range of bacteria. These enzymes play essential roles in fatty acid metabolism and the regulation of cell membrane fluidi…	pfam00173, Cyt-b5, Cytochrome b5-like Heme/Steroid binding domain. This family includes heme binding domains from a diverse range of proteins. This family also includes proteins that bind to steroids. The family includes progesterone receptors. Many members of this subfamily are membrane anchored by an N-terminal transmembrane alpha helix. This family also includes a domain in some chitin synthas…	K00507-ko04152 AMPK signaling pathway;ko04212 Longevity regulating pathway - worm;ko01212 Fatty acid metabolism;ko03320 PPAR signaling pathway;ko01040 Biosynthesis of unsaturated fatty acids	KOG1600, KOG1600, KOG1600, Fatty acid desaturase [Lipid transport and metabolism]. 1.35e-52	sp|Q12618|ACO1_AJECA Acyl-CoA desaturase OS=Ajellomyces capsulatus GN=OLE1 PE=1 SV=1 0.0	-	CAF0885341.1 unnamed protein product [Adineta ricciae] >CAF1240941.1 unnamed protein product [Adineta ricciae] 4.37e-86	-
TRINITY_DN2672_c0_g1	14.4502	847.126	-5.87341	7.74973e-13	7.35126e-11	down	-	-	-	-	-	-	-	-
TRINITY_DN8638_c0_g1	2.52624	145.094	-5.84385	1.35469e-11	1.05641e-09	down	-	-	-	-	-	-	-	-
TRINITY_DN1023_c0_g1	8.47555	484.659	-5.83752	1.74509e-31	3.16884e-28	down	-	-	-	-	-	-	-	-
TRINITY_DN25945_c0_g1	0.127858	6.98772	-5.77221	0.00298417	0.0194822	down	cd03139, GATase1_PfpI_2, Type 1 glutamine amidotransferase (GATase1)-like domain found in a subgroup of proteins similar to PfpI from Pyrococcus furiosus. Type 1 glutamine amidotransferase (GATase1)-like domain found in a subgroup of proteins similar to PfpI from Pyrococcus furiosus. PfpI is an ATP-independent intracellular proteases which may hydrolyze small peptides to provide a nutritional sou…	-	-	-	sp|Q8G9F9|INHA_PSEPU Isonitrile hydratase OS=Pseudomonas putida GN=inhA PE=1 SV=1 1.14e-10	-	CAF1215146.1 unnamed protein product [Adineta steineri] >CAF3565104.1 unnamed protein product [Adineta steineri] 1.08e-29	-
TRINITY_DN6276_c0_g1	0.036752	1.99554	-5.76282	0.00803709	0.0414608	down	-	-	-	-	-	GO:0000003, reproduction;GO:0000228, nuclear chromosome;GO:0000280, nuclear division;GO:0000793, condensed chromosome;GO:0000794, condensed nuclear chromosome;GO:0000795, synaptonemal complex;GO:0003674, molecular_function;GO:0003676, nucleic acid binding;GO:0003677, DNA binding;GO:0003690, double-stranded DNA binding;GO:0003824, catalytic activity;GO:0005488, binding;GO:0005575, cellular_compone…	-	-
TRINITY_DN7691_c0_g1	0.152297	8.13749	-5.73963	1.04308e-05	0.000187268	down	-	pfam00561, Abhydrolase_1, alpha/beta hydrolase fold. This catalytic domain is found in a very wide range of enzymes. 9.08e-06	-	-	-	-	-	-
TRINITY_DN147_c0_g2	0.119282	6.23001	-5.70679	0.000165012	0.001919	down	-	-	-	-	-	-	-	-
TRINITY_DN23162_c0_g1	1.31071	67.0003	-5.67574	8.22831e-17	1.5158e-14	down	-	-	-	-	-	-	-	-
TRINITY_DN269_c0_g1	0.0676827	3.44738	-5.67057	5.42847e-05	0.000754937	down	-	-	-	-	-	-	-	-
TRINITY_DN11000_c0_g1	4.12825	204.502	-5.63044	4.64082e-27	4.53766e-24	down	cd13547, PBP2_Fbp_like_2, Substrate binding domain of an uncharacterized ferric iron transporter, a member of the type 2 periplasmic binding fold superfamily. The periplasmic iron binding protein plays an essential role in the iron uptake pathway of Gram-negative pathogenic bacteria from the Pasteurellaceae and Neisseriaceae families and is critical for survival of these pathogens within the host…	-	-	-	-	-	XP_037031050.1 uncharacterized protein LOC119070703 [Bradysia coprophila] 2.83e-77	-
TRINITY_DN9082_c0_g1	0.153759	7.56813	-5.62119	1.70462e-08	6.58145e-07	down	-	-	-	-	sp|B8NGP8|RHGC_ASPFN Probable rhamnogalacturonase C OS=Aspergillus flavus (strain ATCC 200026 / FGSC A1120 / NRRL 3357 / JCM 12722 / SRRC 167) GN=rhgC PE=3 SV=2 0.0	-	CAF1502399.1 unnamed protein product [Adineta ricciae] 9.46e-16	-
TRINITY_DN6919_c0_g1	0.0367387	1.77291	-5.59268	0.00119841	0.00961679	down	-	pfam00450, Peptidase_S10, Serine carboxypeptidase. 1.10e-28	-	KOG1282, KOG1282, KOG1282, Serine carboxypeptidases (lysosomal cathepsin A) [Amino acid transport and metabolism, Posttranslational modification, protein turnover, chaperones]. 2.23e-17	sp|P38109|YBY9_YEAST Putative serine carboxypeptidase YBR139W OS=Saccharomyces cerevisiae (strain ATCC 204508 / S288c) GN=YBR139W PE=1 SV=1 6.32e-43	-	KAJ3027691.1 hypothetical protein HDU68_003332 [Siphonaria sp. JEL0065] 7.42e-41	-
TRINITY_DN8808_c0_g1	2.35592	111.49	-5.56448	4.58313e-15	6.54564e-13	down	-	-	-	-	-	-	-	-
TRINITY_DN4339_c0_g1	0.0549195	2.56697	-5.5466	0.000331151	0.00343613	down	-	-	-	-	-	-	-	-
TRINITY_DN2714_c0_g1	0.053131	2.46218	-5.53424	0.000591627	0.00552225	down	-	pfam03171, 2OG-FeII_Oxy, 2OG-Fe(II) oxygenase superfamily. This family contains members of the 2-oxoglutarate (2OG) and Fe(II)-dependent oxygenase superfamily. This family includes the C-terminal of prolyl 4-hydroxylase alpha subunit. The holoenzyme has the activity EC:1.14.11.2 catalyzing the reaction: Procollagen L-proline + 2-oxoglutarate + O2 <=> procollagen trans- 4-hydroxy-L-proline + succi…	-	KOG0143, KOG0143, KOG0143, Iron/ascorbate family oxidoreductases [Secondary metabolites biosynthesis, transport and catabolism, General function prediction only]. 6.63e-48	sp|P40902|ISP7_SCHPO Sexual differentiation process protein isp7 OS=Schizosaccharomyces pombe (strain 972 / ATCC 24843) GN=isp7 PE=2 SV=1 4.06e-45	GO:0007154, cell communication;GO:0007165, signal transduction;GO:0008150, biological_process;GO:0009987, cellular process;GO:0010958, regulation of amino acid import across plasma membrane;GO:0010963, regulation of L-arginine import;GO:0023052, signaling;GO:0031929, TOR signaling;GO:0032879, regulation of localization;GO:0032890, regulation of organic acid transport;GO:0032891, negative regulati…	MCL4137471.1 hypothetical protein [Idotea baltica] 7.61e-87	-
TRINITY_DN10640_c0_g1	0.200967	9.05805	-5.49417	0.000116244	0.00142761	down	-	-	-	-	-	-	-	-
TRINITY_DN17117_c0_g1	0.0667897	2.95495	-5.46736	0.00476494	0.0279111	down	-	-	-	-	-	-	-	-
TRINITY_DN10387_c0_g1	5.08979	220.526	-5.4372	6.5199e-15	9.0081e-13	down	-	-	-	-	-	-	CAF3747127.1 unnamed protein product [Rotaria sp. Silwood1] 2.56e-11	-
TRINITY_DN24097_c0_g1	0.0514857	2.2028	-5.41903	0.00233551	0.0161341	down	-	-	-	-	-	-	-	-
TRINITY_DN26606_c0_g1	0.31883	13.5119	-5.4053	4.99506e-08	1.67526e-06	down	-	-	-	-	-	-	KAJ3017480.1 hypothetical protein HDU68_011678 [Siphonaria sp. JEL0065] 1.61e-08	-
TRINITY_DN10993_c0_g1	0.243263	10.0965	-5.37519	2.09289e-05	0.000334625	down	-	-	-	-	-	-	-	-
TRINITY_DN4073_c0_g1	0.0886716	3.66138	-5.36777	3.1858e-07	8.67125e-06	down	-	-	-	-	-	-	-	-
TRINITY_DN14169_c0_g3	0.085865	3.51887	-5.3569	1.13804e-05	0.000201753	down	-	-	K00480-ko00621 Dioxin degradation;ko00624 Polycyclic aromatic hydrocarbon degradation;ko00626 Naphthalene degradation;ko01220 Degradation of aromatic compounds	KOG2614, KOG2614, KOG2614, Kynurenine 3-monooxygenase and related flavoprotein monooxygenases [Energy production and conversion, General function prediction only]. 4.92e-11	sp|Q53552|NHG2_PSEPU Salicylate hydroxylase OS=Pseudomonas putida GN=nahG PE=4 SV=1 4.13e-41	-	CAF4203418.1 unnamed protein product [Rotaria magnacalcarata] 8.27e-25	-
TRINITY_DN14305_c1_g3	6.78103	274.139	-5.33726	5.38051e-10	2.96068e-08	down	-	-	-	-	-	-	CBY13234.1 unnamed protein product, partial [Oikopleura dioica] 7.28e-26	Parastrongyloides trichosuri genome assembly P_trichosuri_KNP ,scaffold PTRK_scaffold0000211 0.0
TRINITY_DN10309_c0_g1	0.109604	4.3636	-5.31515	8.29548e-08	2.62298e-06	down	cd11060, CYP57A1-like, cytochrome P450 family 57, subfamily A, polypeptide 1 and similar cytochrome P450s. This family is composed of fungal cytochrome P450s including: Nectria haematococca cytochrome P450 57A1 (CYP57A1), also called pisatin demethylase, which detoxifies the phytoalexin pisatin; Penicillium aethiopicum P450 monooxygenase gsfF, also called griseofulvin synthesis protein F, which c…	pfam00067, p450, Cytochrome P450. Cytochrome P450s are haem-thiolate proteins involved in the oxidative degradation of various compounds. They are particularly well known for their role in the degradation of environmental toxins and mutagens. They can be divided into 4 classes, according to the method by which electrons from NAD(P)H are delivered to the catalytic site. Sequence conservation is re…	-	KOG0157, KOG0157, KOG0157, Cytochrome P450 CYP4/CYP19/CYP26 subfamilies [Secondary metabolites biosynthesis, transport and catabolism, Lipid transport and metabolism]. 2.75e-23	sp|I7LRH3|MAPDE_PENBR Cytochrome P450 monooxygenase mpaDE OS=Penicillium brevicompactum GN=mpaDE PE=1 SV=1 8.54e-38	-	KAG0429187.1 hypothetical protein HPB47_023868 [Ixodes persulcatus] 2.57e-19	-
TRINITY_DN11891_c0_g1	0.768565	30.0921	-5.29107	3.9667e-21	1.62647e-18	down	-	-	K00077-ko00770 Pantothenate and CoA biosynthesis	-	sp|Q9HDU6|PANE_SCHPO Probable 2-dehydropantoate 2-reductase OS=Schizosaccharomyces pombe (strain 972 / ATCC 24843) GN=SPBPB2B2.09c PE=3 SV=1 7.87e-22	GO:0003674, molecular_function;GO:0003824, catalytic activity;GO:0005575, cellular_component;GO:0005622, intracellular;GO:0005623, cell;GO:0005737, cytoplasm;GO:0006082, organic acid metabolic process;GO:0006520, cellular amino acid metabolic process;GO:0006573, valine metabolic process;GO:0006575, cellular modified amino acid metabolic process;GO:0006732, coenzyme metabolic process;GO:0006766, v…	-	-
TRINITY_DN14509_c0_g1	0.0506256	1.97437	-5.28538	4.60174e-05	0.000655747	down	-	-	-	-	sp|P08159|HDNO_ARTOX 6-hydroxy-D-nicotine oxidase OS=Arthrobacter oxydans PE=1 SV=2 4.33e-12	-	CAF1145427.1 unnamed protein product [Adineta ricciae] 3.19e-24	-
TRINITY_DN7118_c0_g1	0.10058	3.8858	-5.2718	0.00392091	0.0240418	down	cd00448, YjgF_YER057c_UK114_family, YjgF, YER057c, and UK114 belong to a large family of proteins present in bacteria, archaea, and eukaryotes with no definitive function. The conserved domain is similar in structure to chorismate mutase but there is no sequence similarity and no functional connection. Members of this family have been implicated in isoleucine (Yeo7, Ibm1, aldR) and purine (YjgF) …	pfam01042, Ribonuc_L-PSP, Endoribonuclease L-PSP. Endoribonuclease active on single-stranded mRNA. Inhibits protein synthesis by cleavage of mRNA. Previously thought to inhibit protein synthesis initiation. This protein may also be involved in the regulation of purine biosynthesis. YjgF (renamed RidA) family members are enamine/imine deaminases. They hydrolyze reactive intermediates released by P…	-	KOG2317, KOG2317, KOG2317, Putative translation initiation inhibitor UK114/IBM1 [Translation, ribosomal structure and biogenesis]. 7.42e-20	sp|Q9UR06|MMF2_SCHPO Protein mmf2, mitochondrial OS=Schizosaccharomyces pombe (strain 972 / ATCC 24843) GN=mmf2 PE=3 SV=1 7.16e-27	-	KAI4453325.1 2-iminobutanoate/2-iminopropanoate deaminase rida [Holotrichia oblita] 4.89e-19	-
TRINITY_DN4919_c0_g1	0.191183	7.08253	-5.21124	2.07182e-05	0.000333278	down	cd04077, Peptidases_S8_PCSK9_ProteinaseK_like, Peptidase S8 family domain in ProteinaseK-like proteins. The peptidase S8 or Subtilase clan of proteases have a Asp/His/Ser catalytic triad that is not homologous to trypsin. This CD contains several members of this clan including: PCSK9 (Proprotein convertase subtilisin/kexin type 9), Proteinase_K, Proteinase_T, and other subtilisin-like serine prot…	-	-	KOG1153, KOG1153, KOG1153, Subtilisin-related protease/Vacuolar protease B [Posttranslational modification, protein turnover, chaperones]. 8.37e-20	sp|A1CIA7|ORYZ_ASPCL Alkaline protease 1 OS=Aspergillus clavatus (strain ATCC 1007 / CBS 513.65 / DSM 816 / NCTC 3887 / NRRL 1) GN=alp1 PE=3 SV=1 3.65e-30	-	CAH1792832.1 unnamed protein product [Owenia fusiformis] 1.76e-17	-
TRINITY_DN18851_c0_g1	1.91355	70.7184	-5.20776	7.91563e-21	3.06632e-18	down	-	-	-	-	-	-	XP_018901895.1 PREDICTED: uncharacterized protein LOC109033648 [Bemisia tabaci] 1.77e-65	-
TRINITY_DN8180_c0_g1	34.0547	1245.37	-5.19258	2.67653e-20	8.72343e-18	down	-	-	-	-	-	-	-	-
TRINITY_DN14083_c1_g12	0.286757	10.2773	-5.16348	3.83233e-13	3.80568e-11	down	-	-	-	-	-	-	-	-
TRINITY_DN11208_c0_g1	0.836102	28.8977	-5.11113	3.37364e-14	4.1233e-12	down	-	-	-	-	-	-	-	-
TRINITY_DN5247_c0_g1	47.6643	1623.3	-5.08987	1.36684e-15	2.09325e-13	down	cd08247, AST1_like, AST1 is a cytoplasmic protein associated with the periplasmic membrane in yeast. This group contains members identified in targeting of yeast membrane proteins ATPase. AST1 is a cytoplasmic protein associated with the periplasmic membrane in yeast, identified as a multicopy suppressor of pma1 mutants which cause temperature sensitive growth arrest due to the inability of ATPas…	pfam13602, ADH_zinc_N_2, Zinc-binding dehydrogenase. 6.58e-07	-	KOG1198, KOG1198, KOG1198, Zinc-binding oxidoreductase [Energy production and conversion, General function prediction only]. 2.71e-21	sp|Q924D0|RT4I1_MOUSE Reticulon-4-interacting protein 1, mitochondrial OS=Mus musculus GN=Rtn4ip1 PE=1 SV=2 8.16e-31	GO:0003674, molecular_function;GO:0003824, catalytic activity;GO:0005575, cellular_component;GO:0005622, intracellular;GO:0005623, cell;GO:0005737, cytoplasm;GO:0005739, mitochondrion;GO:0008150, biological_process;GO:0008152, metabolic process;GO:0016491, oxidoreductase activity;GO:0016614, oxidoreductase activity, acting on CH-OH group of donors;GO:0016616, oxidoreductase activity, acting on th…	CAF1048179.1 unnamed protein product [Adineta steineri] >CAF1099707.1 unnamed protein product [Adineta steineri] >CAF3760695.1 unnamed protein product [Adineta steineri] >CAF3988391.1 unnamed protein product [Adineta steineri] 2.97e-52	-
TRINITY_DN10540_c0_g1	0.612963	20.7422	-5.08063	1.05335e-06	2.53102e-05	down	cd10548, cupin_CDO, cysteine dioxygenase, cupin domain. This family contains cysteine dioxygenase (CDO; EC 1.13.11.20), which catalyzes the conversion of cysteine to cysteine sulfinic acid, the first step in the biosynthesis of essential oxidized cysteine metabolites such as sulfate, hypotaurine, and taurine. CDO also plays an important role in the regulation of intracellular cysteine levels in m…	pfam05995, CDO_I, Cysteine dioxygenase type I. Cysteine dioxygenase type I (EC:1.13.11.20) converts cysteine to cysteinesulphinic acid and is the rate-limiting step in sulphate production. 8.85e-22	K00456-ko00270 Cysteine and methionine metabolism;ko00430 Taurine and hypotaurine metabolism	KOG4064, KOG4064, KOG4064, Cysteine dioxygenase CDO1 [Amino acid transport and metabolism]. 7.15e-33	sp|Q5RLY7|CDO_AJECG Cysteine dioxygenase OS=Ajellomyces capsulatus (strain G186AR / H82 / ATCC MYA-2454 / RMSCC 2432) GN=CDO1 PE=2 SV=2 4.16e-52	-	XP_043285487.1 cysteine dioxygenase type 1 isoform X1 [Venturia canescens] 3.95e-36	-
TRINITY_DN7777_c0_g1	0.447544	15.1185	-5.07814	4.00928e-09	1.78189e-07	down	-	-	-	-	-	-	-	-
TRINITY_DN9407_c0_g1	0.170548	5.68113	-5.05792	0.00089656	0.00760759	down	cd17323, MFS_Tpo1_MDR_like, Yeast Polyamine transporter 1 (Tpo1) and similar multidrug resistance (MDR) transporters of the Major Facilitator Superfamily. This family is composed of fungal multidrug resistance (MDR) transporters including several proteins from Saccharomyces cerevisiae such as polyamine transporters 1-4 (Tpo1-4), quinidine resistance proteins 1-3 (Qdr1-3), dityrosine transporter 1…	-	-	-	sp|O59700|YN43_SCHPO Uncharacterized transporter C36.03c OS=Schizosaccharomyces pombe (strain 972 / ATCC 24843) GN=SPBC36.03c PE=3 SV=1 9.51e-33	-	CAF1212513.1 unnamed protein product [Adineta steineri] >CAF1494558.1 unnamed protein product [Adineta steineri] 1.06e-31	-
TRINITY_DN12965_c0_g1	168.877	5519.69	-5.03055	1.22742e-13	1.36858e-11	down	-	-	-	-	-	-	-	-
TRINITY_DN7782_c0_g2	0.0251669	0.818019	-5.02253	0.00421955	0.0254555	down	cd03281, ABC_MSH5_euk, ATP-binding cassette domain of eukaryotic MutS5 homolog. The MutS protein initiates DNA mismatch repair by recognizing mispaired and unpaired bases embedded in duplex DNA and activating endo- and exonucleases to remove the mismatch. Members of the MutS family possess C-terminal domain with a conserved ATPase activity that belongs to the ATP binding cassette (ABC) superfamil…	pfam00488, MutS_V, MutS domain V. This domain is found in proteins of the MutS family (DNA mismatch repair proteins) and is found associated with pfam01624, pfam05188, pfam05192 and pfam05190. The mutS family of proteins is named after the Salmonella typhimurium MutS protein involved in mismatch repair; other members of the family included the eukaryotic MSH 1,2,3, 4,5 and 6 proteins. These have …	-	KOG0221, KOG0221, KOG0221, Mismatch repair ATPase MSH5 (MutS family) [Replication, recombination and repair]. 4.48e-98	sp|O43196|MSH5_HUMAN MutS protein homolog 5 OS=Homo sapiens GN=MSH5 PE=1 SV=1 1.23e-85	GO:0000003, reproduction;GO:0000228, nuclear chromosome;GO:0000280, nuclear division;GO:0000793, condensed chromosome;GO:0000794, condensed nuclear chromosome;GO:0000795, synaptonemal complex;GO:0003674, molecular_function;GO:0003676, nucleic acid binding;GO:0003677, DNA binding;GO:0003690, double-stranded DNA binding;GO:0003824, catalytic activity;GO:0005488, binding;GO:0005575, cellular_compone…	XP_028412977.1 mutS protein homolog 5-like isoform X2 [Dendronephthya gigantea] 3.27e-111	-
TRINITY_DN14288_c1_g11	0.315936	10.046	-4.99085	2.16751e-07	6.10893e-06	down	-	pfam04199, Cyclase, Putative cyclase. Proteins in this family are thought to be cyclase enzymes. They are found in proteins involved in antibiotic synthesis. However they are also found in organisms that do not make antibiotics pointing to a wider role for these proteins. The proteins contain a conserved motif HXGTHXDXPXH that is likely to form part of the active site. 4.65e-11	-	-	sp|B2U7J9|KYNB_RALPJ Kynurenine formamidase OS=Ralstonia pickettii (strain 12J) GN=kynB PE=3 SV=1 9.75e-09	-	KAG8172642.1 hypothetical protein JTE90_004895, partial [Oedothorax gibbosus] 3.65e-06	-
TRINITY_DN438_c0_g1	51.4054	1595.19	-4.95567	0.00265778	0.0178369	down	-	-	-	-	-	-	-	-
TRINITY_DN7252_c0_g1	2.11351	64.714	-4.93637	5.82768e-12	4.77907e-10	down	-	-	-	-	-	-	-	-
TRINITY_DN9580_c0_g1	0.519081	15.817	-4.92937	6.69835e-15	9.15513e-13	down	cd06453, SufS_like, Cysteine desulfurase (SufS)-like. This family belongs to the pyridoxal phosphate (PLP)-dependent aspartate aminotransferase superfamily (fold I). The major groups in this CD correspond to cysteine desulfurase (SufS) and selenocysteine lyase. SufS catalyzes the removal of elemental sulfur and selenium atoms from L-cysteine, L-cystine, L-selenocysteine, and L-selenocystine to pr…	-	K20247-ko00340 Histidine metabolism	KOG1549, KOG1549, KOG1549, Cysteine desulfurase NFS1 [Amino acid transport and metabolism]. 9.64e-11	sp|A7UX13|EGT2_NEUCR Hercynylcysteine sulfoxide lyase OS=Neurospora crassa (strain ATCC 24698 / 74-OR23-1A / CBS 708.71 / DSM 1257 / FGSC 987) GN=egt-2 PE=1 SV=1 5.32e-175	GO:0000096, sulfur amino acid metabolic process;GO:0000097, sulfur amino acid biosynthetic process;GO:0003674, molecular_function;GO:0003824, catalytic activity;GO:0006082, organic acid metabolic process;GO:0006520, cellular amino acid metabolic process;GO:0006575, cellular modified amino acid metabolic process;GO:0006577, amino-acid betaine metabolic process;GO:0006578, amino-acid betaine biosyn…	XP_037026235.1 hercynylcysteine sulfoxide lyase-like [Bradysia coprophila] >XP_037026243.1 hercynylcysteine sulfoxide lyase-like [Bradysia coprophila] 5.67e-62	-
TRINITY_DN10443_c0_g1	1.21532	36.6533	-4.91454	2.15361e-13	2.28121e-11	down	cd17502, MFS_Azr1_MDR_like, Saccharomyces cerevisiae Azole resistance protein 1 (Azr1p), and similar multidrug resistance (MDR) transporters of the Major Facilitator Superfamily. This subfamily is composed of multidrug resistance (MDR) transporters including various Saccharomyces cerevisiae proteins such as azole resistance protein 1 (Azr1p), vacuolar basic amino acid transporter 1 (Vba1p), vacuo…	pfam06609, TRI12, Fungal trichothecene efflux pump (TRI12). This family consists of several fungal specific trichothecene efflux pump proteins. Many of the genes involved in trichothecene toxin biosynthesis in Fusarium sporotrichioides are present within a gene cluster.It has been suggested that TRI12 may play a role in F. sporotrichioides self-protection against trichothecenes. 1.68e-08	-	-	sp|B6HJU0|ROQT_PENRW Efflux pump roqT OS=Penicillium rubens (strain ATCC 28089 / DSM 1075 / NRRL 1951 / Wisconsin 54-1255) GN=roqT PE=1 SV=1 6.11e-140	-	KAJ3020485.1 hypothetical protein HDU68_010156 [Siphonaria sp. JEL0065] 8.32e-85	-
TRINITY_DN10070_c0_g1	2.72542	81.8994	-4.9093	5.5926e-13	5.34492e-11	down	cd09597, M4_TLP, Peptidase M4 family including thermolysin, protealysin, aureolysin, and neutral protease. This peptidase M4 family includes several endopeptidases such as thermolysin (EC 3.4.24.27), aureolysin (the extracellular metalloproteinase from Staphylococcus aureus), neutral protease from Bacillus cereus, protealysin, and bacillolysin (EC 3.4.24.28). Typically, the M4 peptidases consist …	pfam01447, Peptidase_M4, Thermolysin metallopeptidase, catalytic domain. 4.00e-13	-	-	sp|A9YWT8|PRTS_PHOAZ Protease PrtS OS=Photorhabdus sp. (strain Az29) GN=prtS PE=1 SV=1 7.23e-31	-	XP_018401244.1 PREDICTED: extracellular metalloprotease-like [Cyphomyrmex costatus] 3.18e-23	-
TRINITY_DN7302_c0_g1	0.15546	4.63947	-4.89935	2.90222e-06	6.07746e-05	down	cd12244, RRM2_MSSP, RNA recognition motif 2 (RRM2) found in the c-myc gene single-strand binding proteins (MSSP) family. This subfamily corresponds to the RRM2 of c-myc gene single-strand binding proteins (MSSP) family, including single-stranded DNA-binding protein MSSP-1 (also termed RBMS1 or SCR2) and MSSP-2 (also termed RBMS2 or SCR3). All MSSP family members contain two RNA recognition motifs…	pfam00076, RRM_1, RNA recognition motif. (a.k.a. RRM, RBD, or RNP domain). The RRM motif is probably diagnostic of an RNA binding protein. RRMs are found in a variety of RNA binding proteins, including various hnRNP proteins, proteins implicated in regulation of alternative splicing, and protein components of snRNPs. The motif also appears in a few single stranded DNA binding proteins. The RRM st…	-	KOG0145, KOG0145, KOG0145, RNA-binding protein ELAV/HU (RRM superfamily) [RNA processing and modification]. 1.93e-10	sp|Q2L4W6|SPO5_SCHPO Sporulation-specific protein 5 OS=Schizosaccharomyces pombe (strain 972 / ATCC 24843) GN=spo5 PE=1 SV=1 4.65e-24	GO:0000003, reproduction;GO:0000226, microtubule cytoskeleton organization;GO:0000280, nuclear division;GO:0003006, developmental process involved in reproduction;GO:0003674, molecular_function;GO:0003676, nucleic acid binding;GO:0003723, RNA binding;GO:0005488, binding;GO:0005575, cellular_component;GO:0005622, intracellular;GO:0005623, cell;GO:0005634, nucleus;GO:0005737, cytoplasm;GO:0006996, …	KAJ3027463.1 hypothetical protein HDU68_003760 [Siphonaria sp. JEL0065] 8.70e-16	-
TRINITY_DN16183_c0_g1	0.40561	12.0901	-4.89759	4.10812e-09	1.80686e-07	down	-	-	-	-	-	-	-	-
TRINITY_DN7779_c0_g1	0.124205	3.63534	-4.87129	5.30824e-09	2.28722e-07	down	cd07106, ALDH_AldA-AAD23400, Streptomyces aureofaciens putative aldehyde dehydrogenase AldA (AAD23400)-like. Putative aldehyde dehydrogenase, AldA, from Streptomyces aureofaciens (locus AAD23400) and other similar sequences are present in this CD. 4.83e-155	pfam00171, Aldedh, Aldehyde dehydrogenase family. This family of dehydrogenases act on aldehyde substrates. Members use NADP as a cofactor. The family includes the following members: The prototypical members are the aldehyde dehydrogenases EC:1.2.1.3. Succinate-semialdehyde dehydrogenase EC:1.2.1.16. Lactaldehyde dehydrogenase EC:1.2.1.22. Benzaldehyde dehydrogenase EC:1.2.1.28. Methylmalonate-se…	-	KOG2450, KOG2450, KOG2450, Aldehyde dehydrogenase [Energy production and conversion]. 6.34e-102	sp|P40047|ALDH5_YEAST Aldehyde dehydrogenase 5, mitochondrial OS=Saccharomyces cerevisiae (strain ATCC 204508 / S288c) GN=ALD5 PE=1 SV=4 3.61e-90	-	CAB3244060.1 unnamed protein product [Arctia plantaginis] >CAB3253757.1 unnamed protein product [Arctia plantaginis] 5.16e-94	-
TRINITY_DN7784_c0_g1	0.106356	3.05237	-4.84295	2.7596e-05	0.000426731	down	-	pfam08450, SGL, SMP-30/Gluconolaconase/LRE-like region. This family describes a region that is found in proteins expressed by a variety of eukaryotic and prokaryotic species. These proteins include various enzymes, such as senescence marker protein 30 (SMP-30), gluconolactonase and luciferin-regenerating enzyme (LRE). SMP-30 is known to hydrolyze diisopropyl phosphorofluoridate in the liver, and …	-	KOG1520, KOG1520, KOG1520, Predicted alkaloid synthase/Surface mucin Hemomucin [General function prediction only]. 1.05e-06	sp|Q01578|GNL_ZYMMO Gluconolactonase OS=Zymomonas mobilis subsp. mobilis (strain ATCC 31821 / ZM4 / CP4) GN=gnl PE=1 SV=2 5.35e-07	-	CAF0914139.1 unnamed protein product [Adineta ricciae] >CAF0946521.1 unnamed protein product [Adineta ricciae] 4.49e-21	-
TRINITY_DN7695_c0_g1	4.7976	137.477	-4.84073	8.43253e-19	2.19519e-16	down	cd17356, MFS_HXT, Fungal Hexose transporter subfamily of the Major Facilitator Superfamily of transporters and similar proteins. The fungal hexose transporter (HXT) subfamily is comprised of functionally redundant proteins that function mainly in the transport of glucose, as well as other sugars such as galactose and fructose. Saccharomyces cerevisiae has 20 genes that encode proteins in this fam…	pfam00083, Sugar_tr, Sugar (and other) transporter. 7.64e-57	-	KOG0254, KOG0254, KOG0254, Predicted transporter (major facilitator superfamily) [General function prediction only]. 8.19e-48	sp|P39932|STL1_YEAST Sugar transporter STL1 OS=Saccharomyces cerevisiae (strain ATCC 204508 / S288c) GN=STL1 PE=1 SV=2 4.29e-62	-	CAF0749174.1 unnamed protein product [Didymodactylos carnosus] >CAF3527612.1 unnamed protein product [Didymodactylos carnosus] 8.28e-77	-
TRINITY_DN16194_c0_g1	0.178057	5.06339	-4.82969	0.00181651	0.0133853	down	-	-	-	-	-	-	-	-
TRINITY_DN9511_c0_g1	0.461303	12.9596	-4.81217	9.82274e-10	5.0962e-08	down	cd11058, CYP60B-like, cytochrome P450 family 60, subfamily B and similar cytochrome P450s. This family is composed of fungal cytochrome P450s including: Aspergillus nidulans cytochrome P450 60B (CYP60B), also called versicolorin B desaturase, which catalyzes the conversion of versicolorin B to versicolorin A during sterigmatocystin biosynthesis; Fusarium sporotrichioides cytochrome P450 65A1 (CYP…	pfam00067, p450, Cytochrome P450. Cytochrome P450s are haem-thiolate proteins involved in the oxidative degradation of various compounds. They are particularly well known for their role in the degradation of environmental toxins and mutagens. They can be divided into 4 classes, according to the method by which electrons from NAD(P)H are delivered to the catalytic site. Sequence conservation is re…	-	KOG0158, KOG0158, KOG0158, Cytochrome P450 CYP3/CYP5/CYP6/CYP9 subfamilies [Secondary metabolites biosynthesis, transport and catabolism]. 3.38e-17	sp|O13317|TRI11_FUSSP Isotrichodermin C-15 hydroxylase OS=Fusarium sporotrichioides GN=TRI11 PE=3 SV=1 1.28e-88	-	XP_004568382.2 cytochrome P450 3A40 isoform X3 [Maylandia zebra] 2.16e-13	-
TRINITY_DN10923_c0_g2	0.386503	10.6946	-4.79026	3.36674e-08	1.19205e-06	down	-	pfam14226, DIOX_N, non-haem dioxygenase in morphine synthesis N-terminal. This is the highly conserved N-terminal region of proteins with 2-oxoglutarate/Fe(II)-dependent dioxygenase activity. 4.34e-07	-	KOG0143, KOG0143, KOG0143, Iron/ascorbate family oxidoreductases [Secondary metabolites biosynthesis, transport and catabolism, General function prediction only]. 1.11e-21	sp|Q7LL04|YQK1_SCHPO UPF0676 protein C1494.01 OS=Schizosaccharomyces pombe (strain 972 / ATCC 24843) GN=SPCC1494.01 PE=3 SV=2 9.06e-28	-	CAF0874004.1 unnamed protein product [Adineta steineri] 3.37e-29	-
TRINITY_DN8250_c0_g2	0.0790144	2.16392	-4.77539	0.00495012	0.0287705	down	-	-	-	-	-	-	-	-
TRINITY_DN10782_c0_g2	4.42359	121.096	-4.77478	1.34899e-10	8.53086e-09	down	-	pfam03171, 2OG-FeII_Oxy, 2OG-Fe(II) oxygenase superfamily. This family contains members of the 2-oxoglutarate (2OG) and Fe(II)-dependent oxygenase superfamily. This family includes the C-terminal of prolyl 4-hydroxylase alpha subunit. The holoenzyme has the activity EC:1.14.11.2 catalyzing the reaction: Procollagen L-proline + 2-oxoglutarate + O2 <=> procollagen trans- 4-hydroxy-L-proline + succi…	-	KOG0143, KOG0143, KOG0143, Iron/ascorbate family oxidoreductases [Secondary metabolites biosynthesis, transport and catabolism, General function prediction only]. 4.57e-25	sp|Q54RA4|Y3291_DICDI Probable iron/ascorbate oxidoreductase DDB_G0283291 OS=Dictyostelium discoideum GN=DDB_G0283291 PE=3 SV=1 4.29e-28	-	KAJ3027834.1 hypothetical protein HDU68_003035, partial [Siphonaria sp. JEL0065] 3.32e-68	-
TRINITY_DN13952_c2_g3	0.0866582	2.34577	-4.75858	0.000559024	0.00528309	down	-	-	-	-	-	-	-	-
TRINITY_DN7062_c0_g1	0.0986207	2.65991	-4.75334	6.65278e-06	0.000125465	down	-	pfam02129, Peptidase_S15, X-Pro dipeptidyl-peptidase (S15 family). 1.94e-27	-	-	sp|Q9L9D7|COCE_RHOSM Cocaine esterase OS=Rhodococcus sp. (strain MB1 Bresler) GN=cocE PE=1 SV=1 1.05e-13	-	CAF4023904.1 unnamed protein product [Adineta steineri] 4.96e-116	-
TRINITY_DN3164_c0_g1	4.97825	133.242	-4.74226	3.91679e-11	2.75063e-09	down	-	-	-	-	-	-	-	-
TRINITY_DN23865_c0_g1	0.270074	7.14002	-4.7245	0.00122386	0.0097655	down	-	-	-	-	-	-	-	-
TRINITY_DN8309_c0_g1	8.84597	224.741	-4.6671	6.98679e-09	2.93099e-07	down	-	-	-	-	-	-	-	-
TRINITY_DN9591_c0_g1	0.184267	4.63013	-4.65119	7.74495e-05	0.00101806	down	cd05352, MDH-like_SDR_c, mannitol dehydrogenase (MDH)-like, classical (c) SDRs. NADP-mannitol dehydrogenase catalyzes the conversion of fructose to mannitol, an acyclic 6-carbon sugar. MDH is a tetrameric member of the SDR family. This subgroup also includes various other tetrameric SDRs, including Pichia stipitis D-arabinitol dehydrogenase (aka polyol dehydrogenase), Candida albicans Sou1p, a so…	pfam00106, adh_short, short chain dehydrogenase. This family contains a wide variety of dehydrogenases. 1.67e-18	-	KOG1200, KOG1200, KOG1200, Mitochondrial/plastidial beta-ketoacyl-ACP reductase [Lipid transport and metabolism]. 1.36e-19	sp|Q99LB2|DHRS4_MOUSE Dehydrogenase/reductase SDR family member 4 OS=Mus musculus GN=Dhrs4 PE=1 SV=3 4.14e-22	-	KAJ3014027.1 hypothetical protein HDU68_000456 [Siphonaria sp. JEL0065] 3.60e-26	-
TRINITY_DN14190_c3_g2	2.25434	56.5277	-4.64818	2.65574e-23	1.60748e-20	down	cd11082, CYP61_CYP710, C-22 sterol desaturase subfamily, such as fungal cytochrome P450 61 and plant cytochrome P450 710. C-22 sterol desaturase (EC 1.14.19.41), also called sterol 22-desaturase, is required for the formation of the C-22 double bond in the sterol side chain of delta22-unsaturated sterols, which are present specifically in fungi and plants. This enzyme is also called cytochrome P4…	pfam00067, p450, Cytochrome P450. Cytochrome P450s are haem-thiolate proteins involved in the oxidative degradation of various compounds. They are particularly well known for their role in the degradation of environmental toxins and mutagens. They can be divided into 4 classes, according to the method by which electrons from NAD(P)H are delivered to the catalytic site. Sequence conservation is re…	K09831-ko00100 Steroid biosynthesis	KOG0157, KOG0157, KOG0157, Cytochrome P450 CYP4/CYP19/CYP26 subfamilies [Secondary metabolites biosynthesis, transport and catabolism, Lipid transport and metabolism]. 1.32e-25	sp|P54781|ERG5_YEAST Cytochrome P450 61 OS=Saccharomyces cerevisiae (strain ATCC 204508 / S288c) GN=ERG5 PE=1 SV=1 8.16e-176	-	CAF2050568.1 unnamed protein product [Rotaria magnacalcarata] >CAF4108468.1 unnamed protein product [Rotaria magnacalcarata] 7.28e-62	-
TRINITY_DN7552_c0_g1	0.45285	11.3353	-4.64564	1.06485e-08	4.31061e-07	down	-	-	-	-	sp|Q93NG3|DHPH_ARTNI 2,6-dihydroxypyridine 3-monooxygenase OS=Arthrobacter nicotinovorans GN=dhpH PE=1 SV=1 5.31e-23	-	CAF0954572.1 unnamed protein product [Adineta ricciae] >CAF1376521.1 unnamed protein product [Adineta ricciae] 3.42e-98	-
TRINITY_DN13972_c0_g2	235.871	5786.53	-4.61663	4.92761e-08	1.6614e-06	down	-	-	-	-	-	-	-	-
TRINITY_DN10577_c0_g1	3.31934	79.9742	-4.59057	1.05681e-07	3.25258e-06	down	-	pfam09298, FAA_hydrolase_N, Fumarylacetoacetase N-terminal. The N-terminal domain of fumarylacetoacetate hydrolase is functionally uncharacterized, and adopts a structure consisting of an SH3-like barrel. 4.12e-24	K01555-ko00350 Tyrosine metabolism;ko00643 Styrene degradation	KOG2843, KOG2843, KOG2843, Fumarylacetoacetase [Carbohydrate transport and metabolism]. 2.43e-116	sp|Q00770|FAAA_EMENI Fumarylacetoacetase OS=Emericella nidulans (strain FGSC A4 / ATCC 38163 / CBS 112.46 / NRRL 194 / M139) GN=fahA PE=1 SV=3 0.0	-	XP_050034252.1 fumarylacetoacetase-like [Dermacentor andersoni] 1.27e-134	-
TRINITY_DN9407_c0_g3	0.358447	8.20834	-4.51726	0.00246915	0.0169102	down	cd17323, MFS_Tpo1_MDR_like, Yeast Polyamine transporter 1 (Tpo1) and similar multidrug resistance (MDR) transporters of the Major Facilitator Superfamily. This family is composed of fungal multidrug resistance (MDR) transporters including several proteins from Saccharomyces cerevisiae such as polyamine transporters 1-4 (Tpo1-4), quinidine resistance proteins 1-3 (Qdr1-3), dityrosine transporter 1…	-	-	-	sp|D7PHY8|VRTL_PENAE Efflux pump vrtL OS=Penicillium aethiopicum GN=vrtL PE=1 SV=1 8.17e-23	-	CAF1472609.1 unnamed protein product [Adineta steineri] >CAF3752254.1 unnamed protein product [Adineta steineri] 4.40e-16	-
TRINITY_DN22024_c0_g1	0.0989507	2.22753	-4.49259	0.00126141	0.0100024	down	-	-	-	-	-	-	-	-
TRINITY_DN10647_c0_g1	0.226549	4.9961	-4.4629	1.93489e-06	4.26987e-05	down	-	-	-	-	-	-	CAF1123220.1 unnamed protein product [Brachionus calyciflorus] 1.02e-16	-
TRINITY_DN26146_c0_g1	3.7017	81.5678	-4.46174	1.30463e-09	6.50322e-08	down	-	-	-	-	-	-	-	-
TRINITY_DN13087_c0_g1	1.7159	37.7036	-4.45767	2.81546e-14	3.47449e-12	down	-	-	-	-	-	-	-	-
TRINITY_DN5548_c0_g2	0.346767	7.43998	-4.42326	0.000163793	0.00191358	down	-	-	-	-	-	-	-	-
TRINITY_DN6912_c0_g1	1.11455	23.8169	-4.41745	1.04304e-08	4.23583e-07	down	-	pfam02668, TauD, Taurine catabolism dioxygenase TauD, TfdA family. This family consists of taurine catabolism dioxygenases of the TauD, TfdA family. TauD from E. coli is a alpha-ketoglutarate-dependent taurine dioxygenase. This enzyme catalyzes the oxygenolytic release of sulfite from taurine. TfdA from Burkholderia sp. is a 2,4-dichlorophenoxyacetic acid/alpha-ketoglutarate dioxygenase. TfdA fro…	-	-	sp|B5BP48|YP54_SCHPO Putative alpha-ketoglutarate-dependent sulfonate dioxygenase OS=Schizosaccharomyces pombe (strain 972 / ATCC 24843) GN=SPBC460.04c PE=3 SV=1 4.68e-25	-	KAJ3027934.1 hypothetical protein HDU68_002790, partial [Siphonaria sp. JEL0065] 6.57e-44	-
TRINITY_DN7287_c0_g1	1.06598	22.6814	-4.41126	4.01763e-11	2.80594e-09	down	cd16348, VOC_YdcJ_like, uncharacterized metal-dependent enzyme similar to Shigella flexneri YdcJ. The vicinal oxygen chelate (VOC) superfamily is composed of structurally related proteins with paired beta.alpha.beta.beta.beta motifs that provide a metal coordination environment with two or three open or readily accessible coordination sites to promote direct electrophilic participation of the met…	pfam07063, DUF1338, Domain of unknown function (DUF1338). This domain is found in a variety of bacterial and fungal hypothetical proteins of unknown function. The structure of this domain has been solved by structural genomics. The structure implies a zinc-binding function, so it is a putative metal hydrolase (information derived from TOPSAN for Structure 3iuz). 1.99e-78	-	-	sp|P76097|YDCJ_ECOLI Uncharacterized protein YdcJ OS=Escherichia coli (strain K12) GN=ydcJ PE=4 SV=1 2.62e-121	-	XP_007470219.1 PREDICTED: uncharacterized protein LOC103077338 [Lipotes vexillifer] 1.45e-124	-
TRINITY_DN10071_c0_g1	1.53865	32.4939	-4.40043	2.33969e-13	2.45005e-11	down	-	-	-	-	-	-	-	-
TRINITY_DN12014_c0_g1	0.802097	16.9332	-4.39993	1.12031e-07	3.41492e-06	down	-	-	-	-	-	-	-	-
TRINITY_DN13081_c0_g1	8.49121	178.058	-4.39023	5.53138e-11	3.73986e-09	down	cd02094, P-type_ATPase_Cu-like, P-type heavy metal-transporting ATPase, similar to human copper-transporting ATPases, ATP7A and ATP7B. The mammalian copper-transporting P-type ATPases, ATP7A and ATP7B are key molecules required for the regulation and maintenance of copper homeostasis. Menkes and Wilson diseases are caused by mutation in ATP7A and ATP7B respectively. This subfamily includes other …	pfam00122, E1-E2_ATPase, E1-E2 ATPase. 8.14e-24	-	KOG0207, KOG0207, KOG0207, Cation transport ATPase [Inorganic ion transport and metabolism]. 3.23e-122	sp|Q9SH30|HMA5_ARATH Probable copper-transporting ATPase HMA5 OS=Arabidopsis thaliana GN=HMA5 PE=1 SV=2 1.52e-111	-	XP_028392441.1 copper-transporting ATPase 2-like isoform X3 [Dendronephthya gigantea] >XP_028392442.1 copper-transporting ATPase 2-like isoform X3 [Dendronephthya gigantea] 2.59e-115	-
TRINITY_DN25541_c0_g1	0.301197	6.24569	-4.37408	4.56221e-08	1.56308e-06	down	cd08557, PI-PLCc_bacteria_like, Catalytic domain of bacterial phosphatidylinositol-specific phospholipase C and similar proteins. This subfamily corresponds to the catalytic domain present in bacterial phosphatidylinositol-specific phospholipase C (PI-PLC, EC 4.6.1.13) and their sequence homologs found in eukaryota. Bacterial PI-PLCs participate in Ca2+-independent PI metabolism, hydrolyzing the …	-	-	-	-	-	CAF0829095.1 unnamed protein product [Adineta steineri] >CAF3859841.1 unnamed protein product [Adineta steineri] 6.72e-109	-
TRINITY_DN13948_c0_g2	16.0441	329.976	-4.36225	6.14009e-09	2.59291e-07	down	-	-	-	-	-	-	-	-
TRINITY_DN11916_c0_g1	2.82571	58.0421	-4.36042	2.03821e-07	5.8119e-06	down	cd08249, enoyl_reductase_like, enoyl_reductase_like. Member identified as possible enoyl reductase of the MDR family. 2-enoyl thioester reductase (ETR) catalyzes the NADPH-dependent dependent conversion of trans-2-enoyl acyl carrier protein/coenzyme A (ACP/CoA) to acyl-(ACP/CoA) in fatty acid synthesis. 2-enoyl thioester reductase activity has been linked in Candida tropicalis as essential in mai…	-	-	KOG1198, KOG1198, KOG1198, Zinc-binding oxidoreductase [Energy production and conversion, General function prediction only]. 6.35e-09	sp|Q8J0F9|MLCG_PENCI Deshydrogenase mlcG OS=Penicillium citrinum GN=mlcG PE=1 SV=1 2.41e-15	-	KAJ3030869.1 hypothetical protein HDU68_007512 [Siphonaria sp. JEL0065] 6.58e-24	-
TRINITY_DN11465_c0_g1	0.230909	4.7181	-4.35281	5.65087e-05	0.000780343	down	-	-	-	KOG0637, KOG0637, KOG0637, Sucrose transporter and related proteins [Carbohydrate transport and metabolism]. 2.03e-08	sp|O14091|SUT1_SCHPO General alpha-glucoside permease OS=Schizosaccharomyces pombe (strain 972 / ATCC 24843) GN=sut1 PE=3 SV=1 1.95e-16	-	XP_005989332.2 PREDICTED: solute carrier family 45 member 3 [Latimeria chalumnae] >XP_014340127.1 PREDICTED: solute carrier family 45 member 3 [Latimeria chalumnae] >XP_014340128.1 PREDICTED: solute carrier family 45 member 3 [Latimeria chalumnae] 1.13e-06	-
TRINITY_DN6686_c0_g1	19.6863	400.65	-4.34708	2.01406e-09	9.73411e-08	down	cd05324, carb_red_PTCR-like_SDR_c, Porcine testicular carbonyl reductase (PTCR)-like, classical (c) SDRs. PTCR is a classical SDR which catalyzes the NADPH-dependent reduction of ketones on steroids and prostaglandins. Unlike most SDRs, PTCR functions as a monomer. This subgroup also includes human carbonyl reductase 1 (CBR1) and CBR3. CBR1 is an NADPH-dependent SDR with broad substrate specifici…	pfam00106, adh_short, short chain dehydrogenase. This family contains a wide variety of dehydrogenases. 9.19e-11	-	KOG1611, KOG1611, KOG1611, Predicted short chain-type dehydrogenase [General function prediction only]. 4.57e-18	sp|O88736|DHB7_MOUSE 3-keto-steroid reductase OS=Mus musculus GN=Hsd17b7 PE=1 SV=1 2.95e-14	-	CAF0747267.1 unnamed protein product [Adineta ricciae] >CAF0909093.1 unnamed protein product [Adineta ricciae] 4.78e-31	-
TRINITY_DN9629_c0_g1	1.98375	39.8494	-4.32825	2.35156e-13	2.45005e-11	down	-	pfam03171, 2OG-FeII_Oxy, 2OG-Fe(II) oxygenase superfamily. This family contains members of the 2-oxoglutarate (2OG) and Fe(II)-dependent oxygenase superfamily. This family includes the C-terminal of prolyl 4-hydroxylase alpha subunit. The holoenzyme has the activity EC:1.14.11.2 catalyzing the reaction: Procollagen L-proline + 2-oxoglutarate + O2 <=> procollagen trans- 4-hydroxy-L-proline + succi…	-	KOG0143, KOG0143, KOG0143, Iron/ascorbate family oxidoreductases [Secondary metabolites biosynthesis, transport and catabolism, General function prediction only]. 5.28e-07	sp|D7PHZ1|VRTI_PENAE Oxidoreductase vrtI OS=Penicillium aethiopicum GN=vrtI PE=1 SV=1 2.46e-62	-	CAF1409617.1 unnamed protein product [Adineta steineri] >CAF3938207.1 unnamed protein product [Adineta steineri] 2.72e-22	-
TRINITY_DN9188_c0_g1	0.0835179	1.67762	-4.32818	0.00110662	0.00900554	down	cd13854, CuRO_1_MaLCC_like, The first cupredoxin domain of the fungal laccases similar to Ma-LCC from Melanocarpus albomyces. The subfamily of fungal laccases includes Ma-LCC and similar proteins. Ma-LCC is a multicopper oxidase (MCO) from Melanocarpus albomyces. Its crystal structure contains all four coppers at the mono- and trinuclear copper centers. Laccase is a blue multi-copper enzyme that …	pfam07732, Cu-oxidase_3, Multicopper oxidase. This entry contains many divergent copper oxidase-like domains that are not recognized by the pfam00394 model. 2.44e-22	-	KOG1263, KOG1263, KOG1263, Multicopper oxidases [Secondary metabolites biosynthesis, transport and catabolism]. 4.47e-06	sp|Q12570|LAC1_BOTFU Laccase-1 OS=Botryotinia fuckeliana GN=lcc1 PE=2 SV=3 3.24e-137	-	CAF1256304.1 unnamed protein product, partial [Didymodactylos carnosus] >CAF4063239.1 unnamed protein product, partial [Didymodactylos carnosus] 2.41e-49	-
TRINITY_DN8006_c0_g1	0.440417	8.76711	-4.31516	0.000876102	0.0074639	down	-	-	-	-	-	-	-	-
TRINITY_DN6841_c0_g1	7.9379	157.561	-4.31101	1.33686e-20	4.72023e-18	down	cd17323, MFS_Tpo1_MDR_like, Yeast Polyamine transporter 1 (Tpo1) and similar multidrug resistance (MDR) transporters of the Major Facilitator Superfamily. This family is composed of fungal multidrug resistance (MDR) transporters including several proteins from Saccharomyces cerevisiae such as polyamine transporters 1-4 (Tpo1-4), quinidine resistance proteins 1-3 (Qdr1-3), dityrosine transporter 1…	-	-	KOG0255, KOG0255, KOG0255, Synaptic vesicle transporter SVOP and related transporters (major facilitator superfamily) [General function prediction only]. 1.19e-13	sp|O59833|YCUD_SCHPO Uncharacterized transporter C965.13 OS=Schizosaccharomyces pombe (strain 972 / ATCC 24843) GN=SPCC965.13 PE=3 SV=1 3.40e-11	GO:0000322, storage vacuole;GO:0000323, lytic vacuole;GO:0000324, fungal-type vacuole;GO:0003674, molecular_function;GO:0005215, transporter activity;GO:0005575, cellular_component;GO:0005622, intracellular;GO:0005623, cell;GO:0005737, cytoplasm;GO:0005773, vacuole;GO:0005886, plasma membrane;GO:0005887, integral component of plasma membrane;GO:0006810, transport;GO:0006811, ion transport;GO:0006…	CAF4220461.1 unnamed protein product, partial [Adineta steineri] 3.97e-33	-
TRINITY_DN10095_c0_g1	0.114066	2.25824	-4.30726	0.000442369	0.00436521	down	-	-	-	-	sp|O74885|YQE1_SCHPO Putative dioxygenase C576.01c OS=Schizosaccharomyces pombe (strain 972 / ATCC 24843) GN=SPCC576.01c PE=3 SV=2 1.10e-58	-	KAJ3031930.1 hypothetical protein HDU68_010010 [Siphonaria sp. JEL0065] 1.81e-50	-
TRINITY_DN11041_c0_g1	10.1428	199.683	-4.29919	7.19917e-08	2.305e-06	down	-	-	-	-	-	-	CAF1362985.1 unnamed protein product [Adineta ricciae] >CAF1523239.1 unnamed protein product [Adineta ricciae] 1.47e-11	-
TRINITY_DN13789_c0_g1	5.55431	107.849	-4.27926	7.40017e-15	1.00068e-12	down	-	pfam00860, Xan_ur_permease, Permease family. This family includes permeases for diverse substrates such as xanthine, uracil, and vitamin C. However many members of this family are functionally uncharacterized and may transport other substrates. Members of this family have ten predicted transmembrane helices. 4.96e-08	-	-	sp|Q07307|UAPA_EMENI Uric acid-xanthine permease OS=Emericella nidulans (strain FGSC A4 / ATCC 38163 / CBS 112.46 / NRRL 194 / M139) GN=uapA PE=1 SV=3 1.23e-154	GO:0000322, storage vacuole;GO:0000323, lytic vacuole;GO:0000324, fungal-type vacuole;GO:0002054, nucleobase binding;GO:0002060, purine nucleobase binding;GO:0003674, molecular_function;GO:0005215, transporter activity;GO:0005345, purine nucleobase transmembrane transporter activity;GO:0005488, binding;GO:0005575, cellular_component;GO:0005622, intracellular;GO:0005623, cell;GO:0005737, cytoplasm…	CAD7233642.1 unnamed protein product [Cyprideis torosa] >CAG0903644.1 unnamed protein product [Cyprideis torosa] 5.64e-24	-
TRINITY_DN9876_c0_g1	0.293374	5.69029	-4.27769	0.000821039	0.00716282	down	-	-	-	-	-	-	-	-
TRINITY_DN13604_c0_g1	1.58795	30.562	-4.26651	2.07947e-12	1.83556e-10	down	cd16147, G6S, glucosamine (N-acetyl)-6-sulfatase(G6S, GNS) AND sulfatase 1(SULF1). N-acetylglucosamine-6-sulfatase also known as glucosamine (N-acetyl)-6-sulfatase hydrolyzes of the 6-sulfate groups of the N-acetyl-D-glucosamine 6-sulfate units of heparan sulfate and keratan sulfate. Deficient of N-acetylglucosamine-6-sulfatase results in disease of Sanfilippo Syndrome type IIId or Mucopolysaccha…	pfam00884, Sulfatase, Sulfatase. 2.90e-10	-	KOG3731, KOG3731, KOG3731, Sulfatases [Carbohydrate transport and metabolism]. 6.06e-42	sp|Q10723|ARS_VOLCA Arylsulfatase OS=Volvox carteri PE=1 SV=1 1.10e-13	-	KAJ3030951.1 hypothetical protein HDU68_007151 [Siphonaria sp. JEL0065] 1.15e-101	-
TRINITY_DN13759_c0_g2	112.61	2155.33	-4.2585	3.23702e-17	6.33011e-15	down	-	-	-	-	-	-	-	-
TRINITY_DN7305_c0_g1	0.300633	5.72922	-4.25226	3.79748e-06	7.71082e-05	down	-	-	-	-	-	-	-	-
TRINITY_DN9176_c0_g2	0.11763	2.19314	-4.22067	6.26697e-05	0.000851973	down	-	-	-	-	-	-	CAF3807877.1 unnamed protein product [Rotaria sp. Silwood1] >CAF4775400.1 unnamed protein product [Rotaria sp. Silwood1] 7.05e-08	-
TRINITY_DN12296_c0_g1	0.52641	9.79677	-4.21805	3.2686e-07	8.85867e-06	down	-	-	-	-	-	-	-	-
TRINITY_DN14885_c0_g1	1.0265	18.8159	-4.19614	8.96858e-05	0.00115268	down	-	-	-	-	-	-	-	-
TRINITY_DN5105_c0_g1	0.777719	14.2512	-4.19568	1.04472e-06	2.51504e-05	down	-	-	-	-	-	-	-	-
TRINITY_DN14171_c2_g5	120.098	2187.65	-4.18709	1.17831e-12	1.06982e-10	down	cd17350, MFS_PTR2, Peptide transporter PTR2 of the Major Facilitator Superfamily of transporters. Fungal peptide transporter or permease PTR2 is a member of the proton-coupled oligopeptide transporter (POT) family of integral membrane proteins that mediate the cellular uptake of di/tripeptides and peptide-like drugs. It is a 12-transmembrane domain (TMD) integral membrane protein that translocate…	pfam00854, PTR2, POT family. The POT (proton-dependent oligopeptide transport) family all appear to be proton dependent transporters. 9.32e-12	-	-	sp|P46030|PTR2_CANAX Peptide transporter PTR2 OS=Candida albicans GN=PTR2 PE=3 SV=1 2.26e-71	-	CAF1435050.1 unnamed protein product [Adineta steineri] >CAF3797891.1 unnamed protein product [Adineta steineri] 1.53e-60	-
TRINITY_DN9225_c0_g1	3.09091	56.248	-4.1857	3.41834e-11	2.44104e-09	down	-	-	-	-	-	-	-	-
TRINITY_DN10654_c0_g1	2.46439	44.3604	-4.16997	0.00538611	0.0306596	down	-	-	-	-	-	-	-	-
TRINITY_DN26542_c0_g1	1.82346	32.5011	-4.15574	1.55164e-06	3.54092e-05	down	-	-	-	-	-	-	-	-
TRINITY_DN7201_c0_g1	0.370413	6.5957	-4.15432	0.00751711	0.0394183	down	-	-	-	-	-	-	-	-
TRINITY_DN11643_c0_g1	3.57267	63.5777	-4.15345	4.42317e-07	1.16163e-05	down	cd01939, Ketohexokinase, Ketohexokinase (fructokinase, KHK) catalyzes the phosphorylation of fructose to fructose-1-phosphate (F1P), the first step in the metabolism of dietary fructose. KHK can also phosphorylate several other furanose sugars. It is found in higher eukaryotes where it is believed to function as a dimer and requires K(+) and ATP to be active. In humans, hepatic KHK deficiency cau…	pfam02615, Ldh_2, Malate/L-lactate dehydrogenase. This family consists of bacterial and archaeal Malate/L-lactate dehydrogenase. L-lactate dehydrogenase, EC:1.1.1.27, catalyzes the reaction (S)-lactate + NAD(+) <=> pyruvate + NADH. Malate dehydrogenase, EC:1.1.1.37 and EC:1.1.1.82, catalyzes the reactions: (S)-malate + NAD(+) <=> oxaloacetate + NADH, and (S)-malate + NADP(+) <=> oxaloacetate + NA…	-	KOG2947, KOG2947, KOG2947, Carbohydrate kinase [Carbohydrate transport and metabolism]. 5.05e-09	sp|Q58820|COMC_METJA L-sulfolactate dehydrogenase OS=Methanocaldococcus jannaschii (strain ATCC 43067 / DSM 2661 / JAL-1 / JCM 10045 / NBRC 100440) GN=comC PE=1 SV=1 1.77e-65	-	XP_037939974.1 uncharacterized oxidoreductase YjmC-like [Teleopsis dalmanni] 9.36e-54	-
TRINITY_DN8043_c0_g1	7.4472	132.322	-4.15121	0.00657719	0.0355605	down	-	pfam18132, Tyosinase_C, Tyosinase C-terminal domain. This is the C-terminal domain of Tyosinase present in Aspergillus oryzae. Tyosinase is a dinuclear copper monooxygenase/oxidase that plays a crucial role in the melanin pigment biosynthesis. The C-terminal domain is referred to as the shielding domain as it prohibits substrate access to the enzyme-active site and blocks the oxidase/oxygenase ac…	K00505-ko00350 Tyrosine metabolism;ko00740 Riboflavin metabolism;ko00950 Isoquinoline alkaloid biosynthesis;ko00965 Betalain biosynthesis;ko04916 Melanogenesis	-	sp|Q8J130|TYRO_ASPFU Tyrosinase OS=Neosartorya fumigata (strain ATCC MYA-4609 / Af293 / CBS 101355 / FGSC A1100) GN=tyr1 PE=3 SV=2 4.54e-82	-	KAJ3032121.1 hypothetical protein HDU68_004431 [Siphonaria sp. JEL0065] 6.19e-32	-
TRINITY_DN5519_c0_g1	0.214673	3.77324	-4.13559	5.13507e-05	0.000722833	down	cd06186, NOX_Duox_like_FAD_NADP, NADPH oxidase (NOX) catalyzes the generation of reactive oxygen species (ROS) such as superoxide and hydrogen peroxide. ROS were originally identified as bactericidal agents in phagocytes, but are now also implicated in cell signaling and metabolism. NOX has a 6-alpha helix heme-binding transmembrane domain fused to a flavoprotein with the nucleotide binding domai…	-	-	KOG0039, KOG0039, KOG0039, Ferric reductase, NADH/NADPH oxidase and related proteins [Inorganic ion transport and metabolism, Secondary metabolites biosynthesis, transport and catabolism]. 8.52e-09	sp|P78588|FREL_CANAX Probable ferric reductase transmembrane component OS=Candida albicans GN=CFL1 PE=3 SV=1 5.31e-21	-	XP_020631551.1 superoxide-generating NADPH oxidase heavy chain subunit A-like [Orbicella faveolata] 3.62e-09	-
TRINITY_DN26375_c0_g1	1.07783	18.8147	-4.12566	6.80475e-08	2.20089e-06	down	-	pfam13816, Dehydratase_hem, Haem-containing dehydratase. This family includes aldoxime dehydratase, EC:4.99.1.5. This is a haem-containing enzyme, which catalyzes the dehydration of aldoximes to their corresponding nitrile. It also includes phenylacetaldoxime dehydratase, EC:4.99.1.7. This haem-containing enzyme catalyzes the dehydration of Z-phenylacetaldoxime to phenylacetonitrile. The enzyme f…	-	-	sp|P82604|OXD_BACSX Phenylacetaldoxime dehydratase OS=Bacillus sp. (strain OxB-1) GN=oxd PE=1 SV=2 9.85e-20	-	-	-
TRINITY_DN13655_c1_g1	92.5529	1608.3	-4.11911	4.2456e-11	2.94895e-09	down	cd08297, CAD3, Cinnamyl alcohol dehydrogenases (CAD). These alcohol dehydrogenases are related to the cinnamyl alcohol dehydrogenases (CAD), members of the medium chain dehydrogenase/reductase family. NAD(P)(H)-dependent oxidoreductases are the major enzymes in the interconversion of alcohols and aldehydes, or ketones. Cinnamyl alcohol dehydrogenases (CAD) reduce cinnamaldehydes to cinnamyl alcoh…	pfam00664, ABC_membrane, ABC transporter transmembrane region. This family represents a unit of six transmembrane helices. Many members of the ABC transporter family (pfam00005) have two such regions. 1.27e-12	-	KOG0055, KOG0055, KOG0055, Multidrug/pheromone exporter, ABC superfamily [Secondary metabolites biosynthesis, transport and catabolism]. 5.28e-75	sp|Q54BT3|ABCB2_DICDI ABC transporter B family member 2 OS=Dictyostelium discoideum GN=abcB2 PE=3 SV=1 6.21e-66	-	CAD5224046.1 unnamed protein product [Bursaphelenchus okinawaensis] >CAG9119487.1 unnamed protein product [Bursaphelenchus okinawaensis] 8.22e-105	-
TRINITY_DN9351_c0_g1	0.488024	8.38798	-4.1033	1.91769e-08	7.27634e-07	down	-	-	-	-	-	-	-	-
TRINITY_DN13980_c2_g1	6.12873	104.653	-4.09388	2.03749e-10	1.25721e-08	down	-	pfam01179, Cu_amine_oxid, Copper amine oxidase, enzyme domain. Copper amine oxidases are a ubiquitous and novel group of quinoenzymes that catalyze the oxidative deamination of primary amines to the corresponding aldehydes, with concomitant reduction of molecular oxygen to hydrogen peroxide. The enzymes are dimers of identical 70-90 kDa subunits, each of which contains a single copper ion and a c…	K00276-ko00410 beta-Alanine metabolism;ko00260 Glycine, serine and threonine metabolism;ko00950 Isoquinoline alkaloid biosynthesis;ko00360 Phenylalanine metabolism;ko00960 Tropane, piperidine and pyridine alkaloid biosynthesis;ko00350 Tyrosine metabolism	KOG1289, KOG1289, KOG1289, Amino acid transporters [Amino acid transport and metabolism]. 2.57e-82	sp|P12807|AMO_PICAN Peroxisomal primary amine oxidase OS=Pichia angusta GN=AMO PE=1 SV=1 0.0	-	XP_021949678.1 copper amine oxidase 1 [Folsomia candida] >OXA58012.1 Copper amine oxidase 1 [Folsomia candida] 6.31e-162	-
TRINITY_DN8197_c0_g1	0.179143	3.05435	-4.09168	0.00377129	0.0233156	down	-	-	K00108-ko00260 Glycine, serine and threonine metabolism	KOG1238, KOG1238, KOG1238, Glucose dehydrogenase/choline dehydrogenase/mandelonitrile lyase (GMC oxidoreductase family) [General function prediction only]. 3.87e-10	sp|A7N2P9|BETA_VIBCB Oxygen-dependent choline dehydrogenase OS=Vibrio campbellii (strain ATCC BAA-1116 / BB120) GN=betA PE=3 SV=1 3.37e-17	-	CAF1260954.1 unnamed protein product [Didymodactylos carnosus] >CAF4067481.1 unnamed protein product [Didymodactylos carnosus] 1.04e-35	-
TRINITY_DN26096_c0_g1	10.0607	171.06	-4.08771	9.8635e-09	4.04435e-07	down	-	-	-	-	sp|Q5UQE9|YL477_MIMIV Uncharacterized peptidase C1-like protein L477 OS=Acanthamoeba polyphaga mimivirus GN=MIMI_L477 PE=3 SV=1 1.25e-19	-	CAF1562343.1 unnamed protein product [Rotaria magnacalcarata] >CAF1686335.1 unnamed protein product [Rotaria magnacalcarata] >CAF2084588.1 unnamed protein product [Rotaria magnacalcarata] >CAF3801682.1 unnamed protein product [Rotaria magnacalcarata] >CAF3810579.1 unnamed protein product [Rotaria magnacalcarata] 7.48e-19	-
TRINITY_DN12499_c0_g2	10.1917	172.576	-4.08177	1.08214e-08	4.36668e-07	down	-	-	-	-	sp|Q54EW2|Y9130_DICDI Putative bifunctional amine oxidase DDB_G0291301 OS=Dictyostelium discoideum GN=DDB_G0291301 PE=1 SV=1 4.04e-54	-	CAF0924995.1 unnamed protein product [Brachionus calyciflorus] 1.83e-55	-
TRINITY_DN8096_c0_g1	0.945178	15.9836	-4.07987	3.00773e-08	1.08304e-06	down	-	-	-	-	sp|Q5B2E9|P2OX_EMENI Pyranose 2-oxidase OS=Emericella nidulans (strain FGSC A4 / ATCC 38163 / CBS 112.46 / NRRL 194 / M139) GN=p2ox PE=3 SV=2 3.22e-155	-	XP_028414362.1 pyranose 2-oxidase-like [Dendronephthya gigantea] 8.08e-162	-
TRINITY_DN8169_c0_g1	9.38941	158.592	-4.07814	9.66414e-06	0.000175487	down	cd11010, S1-P1_nuclease, S1/P1 nucleases and related enzymes. This family summarizes both S1 and P1 nucleases (EC:3.1.30.1) which cleave RNA and single stranded DNA with no base specificity. S1 nuclease is more active on DNA than RNA. Its reaction products are oligonucleotides or single nucleotides with 5' phosphoryl groups. Although its primary substrate is single-stranded, it may also introduce…	pfam02265, S1-P1_nuclease, S1/P1 Nuclease. This family contains both S1 and P1 nucleases (EC:3.1.30.1) which cleave RNA and single stranded DNA with no base specificity. 1.56e-58	-	-	sp|P24021|NUS1_ASPOR Nuclease S1 OS=Aspergillus oryzae (strain ATCC 42149 / RIB 40) GN=nucS PE=1 SV=2 9.87e-88	-	CAF1466742.1 unnamed protein product [Didymodactylos carnosus] >CAF4335728.1 unnamed protein product [Didymodactylos carnosus] 1.33e-26	-
TRINITY_DN887_c0_g1	0.84911	14.3275	-4.07669	6.63254e-05	0.00089497	down	-	-	-	-	-	-	-	-
TRINITY_DN16263_c0_g1	2.04047	33.8104	-4.05049	1.10684e-07	3.38198e-06	down	-	-	-	-	-	-	-	-
TRINITY_DN7854_c0_g1	0.406514	6.72951	-4.04912	0.000349497	0.00360005	down	-	-	-	-	-	-	-	-
TRINITY_DN10002_c0_g1	272.719	4498.43	-4.04394	8.02803e-11	5.31481e-09	down	-	-	-	-	-	-	-	-
TRINITY_DN12683_c0_g1	1.12598	18.4193	-4.03196	1.48915e-13	1.63177e-11	down	-	-	-	-	-	-	-	-
TRINITY_DN10356_c0_g1	0.777104	12.6601	-4.02604	2.70095e-10	1.59567e-08	down	-	pfam00891, Methyltransf_2, O-methyltransferase. This family includes a range of O-methyltransferases. These enzymes utilize S-adenosyl methionine. 2.42e-15	-	KOG3178, KOG3178, KOG3178, Hydroxyindole-O-methyltransferase and related SAM-dependent methyltransferases [General function prediction only]. 1.12e-10	sp|D7PI16|GSFB_PENAE O-methyltransferase gsfB OS=Penicillium aethiopicum GN=gsfB PE=1 SV=1 4.88e-64	-	XP_009020681.1 hypothetical protein HELRODRAFT_192339 [Helobdella robusta] >ESO01445.1 hypothetical protein HELRODRAFT_192339 [Helobdella robusta] 4.30e-12	-
TRINITY_DN7244_c0_g1	1.5882	25.7888	-4.02128	4.29294e-08	1.48282e-06	down	cd00413, Glyco_hydrolase_16, glycosyl hydrolase family 16. The O-Glycosyl hydrolases are a widespread group of enzymes that hydrolyse the glycosidic bond between two or more carbohydrates, or between a carbohydrate and a non-carbohydrate moiety. A glycosyl hydrolase classification system based on sequence similarity has led to the definition of more than 95 different families inlcuding glycosyl h…	pfam00722, Glyco_hydro_16, Glycosyl hydrolases family 16. 4.19e-07	-	-	-	-	-	-
TRINITY_DN25598_c0_g1	0.198	3.20849	-4.01832	0.000230746	0.0025394	down	-	-	-	-	-	-	-	-
TRINITY_DN6988_c0_g1	0.16834	2.72162	-4.01501	0.000674433	0.00612989	down	-	-	-	-	-	-	CAF1289074.1 unnamed protein product [Adineta ricciae] >CAF1553729.1 unnamed protein product [Adineta ricciae] 2.73e-16	-
TRINITY_DN2124_c0_g1	0.760909	12.0503	-3.9852	1.89009e-06	4.17825e-05	down	-	-	-	-	-	-	-	-
TRINITY_DN7848_c0_g1	0.277988	4.3829	-3.97879	0.00279187	0.0185604	down	-	-	-	-	-	-	-	-
TRINITY_DN8328_c0_g1	0.21587	3.39092	-3.97345	0.000988612	0.00818682	down	cd03457, intradiol_dioxygenase_like, Intradiol dioxygenase supgroup. Intradiol dioxygenases catalyze the critical ring-cleavage step in the conversion of catecholate derivatives to citric acid cycle intermediates. They break the catechol C1-C2 bond and utilize Fe3+, as opposed to the extradiol-cleaving enzymes which break the C2-C3 or C1-C6 bond and utilize Fe2+ and Mn+. The family contains catec…	pfam00775, Dioxygenase_C, Dioxygenase. 2.96e-06	-	-	-	-	OQV26249.1 hypothetical protein BV898_00367 [Hypsibius exemplaris] 2.75e-95	-
TRINITY_DN16081_c0_g1	0.776372	12.1798	-3.97159	3.59016e-06	7.34855e-05	down	-	-	-	-	-	-	-	-
TRINITY_DN8810_c0_g1	0.220348	3.44202	-3.9654	0.000430167	0.00427845	down	-	-	-	-	-	-	-	-
TRINITY_DN8541_c0_g1	0.0745259	1.13622	-3.93036	0.00514022	0.0295778	down	-	pfam06985, HET, Heterokaryon incompatibility protein (HET). This family represents a conserved region approximately 150 residues long within various heterokaryon incompatibility proteins that seem to be restricted to ascomycete fungi. Genetic differences in specific het genes prevent a viable heterokaryotic fungal cell from being formed by the fusion of filaments from two different wild-type stra…	-	-	sp|Q9UV10|HET6_NEUCR Heterokaryon incompatibility protein 6, OR allele OS=Neurospora crassa (strain ATCC 24698 / 74-OR23-1A / CBS 708.71 / DSM 1257 / FGSC 987) GN=het-6 PE=4 SV=1 3.59e-29	-	KAI1691421.1 heterokaryon incompatibility protein (HET) domain-containing protein [Ditylenchus destructor] 1.33e-32	-
TRINITY_DN14193_c1_g9	2.01584	30.4719	-3.91803	8.28503e-07	2.04487e-05	down	-	-	-	-	-	-	-	-
TRINITY_DN8_c0_g1	2.39817	36.2385	-3.91752	1.10503e-05	0.000196999	down	-	-	-	-	-	-	-	-
TRINITY_DN4412_c0_g1	0.115893	1.74402	-3.91155	0.00359925	0.0225253	down	-	-	-	-	-	-	-	-
TRINITY_DN13864_c0_g1	0.44402	6.68024	-3.9112	1.00921e-10	6.57848e-09	down	-	-	-	-	-	-	-	-
TRINITY_DN25729_c0_g1	2.95857	44.1785	-3.90037	7.71341e-12	6.20539e-10	down	-	-	-	-	-	-	-	-
TRINITY_DN7132_c0_g1	2.67334	39.8886	-3.89926	2.77735e-09	1.28843e-07	down	-	-	-	-	-	-	KAJ3012026.1 hypothetical protein HDU68_001409 [Siphonaria sp. JEL0065] 3.48e-08	-
TRINITY_DN10766_c0_g1	3.60062	53.6677	-3.89774	4.94087e-10	2.76667e-08	down	-	pfam13520, AA_permease_2, Amino acid permease. 1.02e-13	-	KOG1289, KOG1289, KOG1289, Amino acid transporters [Amino acid transport and metabolism]. 1.80e-69	sp|P19807|HNM1_YEAST Choline transport protein OS=Saccharomyces cerevisiae (strain ATCC 204508 / S288c) GN=HNM1 PE=1 SV=1 6.85e-68	-	CAF3007320.1 unnamed protein product [Rotaria socialis] >CAF3316982.1 unnamed protein product [Rotaria socialis] >CAF3448524.1 unnamed protein product [Rotaria socialis] >CAF3510424.1 unnamed protein product [Rotaria socialis] >CAF3621810.1 unnamed protein product [Rotaria socialis] 2.20e-86	-
TRINITY_DN7218_c0_g1	0.719637	10.7005	-3.89427	9.1051e-05	0.00116786	down	-	-	-	-	-	-	-	-
TRINITY_DN11545_c0_g1	0.352899	5.24537	-3.89372	0.000822844	0.00716797	down	-	-	-	-	-	-	-	-
TRINITY_DN13012_c0_g1	0.822461	12.2163	-3.89272	3.25985e-11	2.34101e-09	down	cd01298, ATZ_TRZ_like, TRZ/ATZ family contains enzymes from the atrazine degradation pathway and related hydrolases. Atrazine, a chlorinated herbizide, can be catabolized by a variety of different bacteria. The first three steps of the atrazine dehalogenation pathway are catalyzed by atrazine chlorohydrolase (AtzA), hydroxyatrazine ethylaminohydrolase (AtzB), and N-isopropylammelide N-isopropylam…	pfam01979, Amidohydro_1, Amidohydrolase family. This family of enzymes are a a large metal dependent hydrolase superfamily. The family includes Adenine deaminase EC:3.5.4.2 that hydrolyzes adenine to form hypoxanthine and ammonia. Adenine deaminases reaction is important for adenine utilisation as a purine and also as a nitrogen source. This family also includes dihydroorotase and N-acetylglucosa…	-	KOG3968, KOG3968, KOG3968, Atrazine chlorohydrolase/guanine deaminase [Nucleotide transport and metabolism, Secondary metabolites biosynthesis, transport and catabolism]. 1.07e-20	sp|A5UMN6|DADD_METS3 5'-deoxyadenosine deaminase OS=Methanobrevibacter smithii (strain PS / ATCC 35061 / DSM 861) GN=dadD PE=3 SV=1 6.95e-66	-	CAF0986246.1 unnamed protein product [Adineta steineri] >CAF1024780.1 unnamed protein product [Adineta steineri] 1.01e-137	-
TRINITY_DN12800_c0_g1	0.473058	7.01901	-3.89118	3.21136e-06	6.61582e-05	down	-	pfam14441, OTT_1508_deam, OTT_1508-like deaminase. A member of the nucleic acid/nucleotide deaminase superfamily prototyped by Orientia OTT_1508. Members of this family are present in a wide phyletic range of bacteria,including several intracellular parasites and eukaryotes such as fungi, Leishmania, Selaginella, and some apicomplexa. In bacteria, these deaminases are predicted to function as tox…	-	-	-	-	-	-
TRINITY_DN12536_c0_g1	0.721027	10.6727	-3.88773	4.20534e-09	1.84e-07	down	cd05120, APH_ChoK_like, Aminoglycoside 3'-phosphotransferase and Choline Kinase family. This family is composed of APH, ChoK, ethanolamine kinase (ETNK), macrolide 2'-phosphotransferase (MPH2'), an unusual homoserine kinase, and uncharacterized proteins with similarity to the N-terminal domain of acyl-CoA dehydrogenase 10 (ACAD10). The members of this family catalyze the transfer of the gamma-pho…	-	-	-	-	-	XP_035708689.1 uncharacterized protein LOC110850868 isoform X2 [Folsomia candida] 1.31e-10	-
TRINITY_DN14258_c0_g9	0.913848	13.5093	-3.88585	5.21726e-05	0.000731695	down	-	-	-	-	-	-	-	-
TRINITY_DN6613_c0_g1	0.158797	2.34065	-3.88165	0.000230082	0.00253649	down	-	pfam06985, HET, Heterokaryon incompatibility protein (HET). This family represents a conserved region approximately 150 residues long within various heterokaryon incompatibility proteins that seem to be restricted to ascomycete fungi. Genetic differences in specific het genes prevent a viable heterokaryotic fungal cell from being formed by the fusion of filaments from two different wild-type stra…	-	-	sp|Q9UV10|HET6_NEUCR Heterokaryon incompatibility protein 6, OR allele OS=Neurospora crassa (strain ATCC 24698 / 74-OR23-1A / CBS 708.71 / DSM 1257 / FGSC 987) GN=het-6 PE=4 SV=1 5.76e-24	-	KAI1691421.1 heterokaryon incompatibility protein (HET) domain-containing protein [Ditylenchus destructor] 8.12e-31	-
TRINITY_DN9748_c0_g1	115.682	1688.97	-3.8679	2.21732e-07	6.23547e-06	down	-	-	-	-	-	-	-	-
TRINITY_DN7868_c0_g1	0.128337	1.86873	-3.86404	0.0014208	0.0110525	down	cd08259, Zn_ADH5, Alcohol dehydrogenases of the MDR family. NAD(P)(H)-dependent oxidoreductases are the major enzymes in the interconversion of alcohols and aldehydes, or ketones. This group contains proteins that share the characteristic catalytic and structural zinc-binding sites of the zinc-dependent alcohol dehydrogenase family. Alcohol dehydrogenase in the liver converts ethanol and NAD+ to …	-	-	-	sp|Q3YVY1|TDH_SHISS L-threonine 3-dehydrogenase OS=Shigella sonnei (strain Ss046) GN=tdh PE=3 SV=1 6.48e-09	-	XP_013308874.1 GroES-like protein [Necator americanus] >ETN86647.1 GroES-like protein [Necator americanus] 3.86e-24	-
TRINITY_DN21371_c0_g1	0.118425	1.72218	-3.86218	0.00184828	0.013531	down	cd14213, PKc_CLK1_4, Catalytic domain of the Dual-specificity protein kinases, CDC-like kinases 1 and 4. Dual-specificity PKs catalyze the transfer of the gamma-phosphoryl group from ATP to serine/threonine as well as tyrosine residues on protein substrates. CLK1 plays a role in neuronal differentiation. CLKs are involved in the phosphorylation and regulation of serine/arginine-rich (SR) proteins…	-	-	KOG0671, KOG0671, KOG0671, LAMMER dual specificity kinases [Signal transduction mechanisms]. 9.07e-14	sp|P49759|CLK1_HUMAN Dual specificity protein kinase CLK1 OS=Homo sapiens GN=CLK1 PE=1 SV=2 1.78e-18	-	XP_047234476.1 dual specificity protein kinase CLK1-like isoform X4 [Girardinichthys multiradiatus] 2.20e-16	-
TRINITY_DN3502_c0_g1	1.74553	25.3553	-3.86054	9.0759e-10	4.74748e-08	down	-	pfam11051, Mannosyl_trans3, Mannosyltransferase putative. This family is conserved in fungi. Several members are annotated as being alpha-1,3-mannosyltransferase but this could not be confirmed. 7.75e-28	-	-	sp|Q5AP90|MNN23_CANAL Alpha-1,2-mannosyltransferase MNN23 OS=Candida albicans (strain SC5314 / ATCC MYA-2876) GN=MNN23 PE=3 SV=1 2.04e-47	GO:0000026, alpha-1,2-mannosyltransferase activity;GO:0000030, mannosyltransferase activity;GO:0000271, polysaccharide biosynthetic process;GO:0003674, molecular_function;GO:0003824, catalytic activity;GO:0005575, cellular_component;GO:0005622, intracellular;GO:0005623, cell;GO:0005737, cytoplasm;GO:0005794, Golgi apparatus;GO:0005975, carbohydrate metabolic process;GO:0005976, polysaccharide met…	KNC29051.1 hypothetical protein FF38_03280 [Lucilia cuprina] 3.47e-18	-
TRINITY_DN14289_c0_g1	6.99226	101.298	-3.85671	5.02035e-09	2.17053e-07	down	-	-	-	-	-	-	-	-
TRINITY_DN10958_c0_g1	0.23487	3.39355	-3.85286	0.000258112	0.00278985	down	cd03431, DNA_Glycosylase_C, DNA glycosylase (MutY in bacteria and hMYH in humans) is responsible for repairing misread A*oxoG residues to C*G by removing the inappropriately paired adenine base from the DNA backbone. It belongs to the Nudix hydrolase superfamily and is important for the repair of various genotoxic lesions. Enzymes belonging to this superfamily requires a divalent cation, such as …	pfam14815, NUDIX_4, NUDIX domain. 4.99e-12	K03575-ko03410 Base excision repair	KOG2457, KOG2457, KOG2457, A/G-specific adenine DNA glycosylase [Replication, recombination and repair]. 1.64e-48	sp|Q8R5G2|MUTYH_RAT Adenine DNA glycosylase OS=Rattus norvegicus GN=Mutyh PE=2 SV=1 2.70e-09	GO:0000075, cell cycle checkpoint;GO:0000077, DNA damage checkpoint;GO:0000700, mismatch base pair DNA N-glycosylase activity;GO:0000701, purine-specific mismatch base pair DNA N-glycosylase activity;GO:0000702, oxidized base lesion DNA N-glycosylase activity;GO:0003674, molecular_function;GO:0003676, nucleic acid binding;GO:0003677, DNA binding;GO:0003684, damaged DNA binding;GO:0003690, double-…	XP_039301380.1 LOW QUALITY PROTEIN: adenine DNA glycosylase-like [Nilaparvata lugens] 1.03e-159	-
TRINITY_DN13750_c0_g1	13.6762	193.298	-3.82109	5.11945e-15	7.23037e-13	down	-	pfam01915, Glyco_hydro_3_C, Glycosyl hydrolase family 3 C-terminal domain. This domain is involved in catalysis and may be involved in binding beta-glucan. This domain is found associated with pfam00933. 1.35e-26	-	-	sp|Q5BFG8|BGLB_EMENI Beta-glucosidase B OS=Emericella nidulans (strain FGSC A4 / ATCC 38163 / CBS 112.46 / NRRL 194 / M139) GN=bglB PE=1 SV=1 3.36e-83	-	MCL4141981.1 hypothetical protein [Idotea baltica] 9.67e-42	-
TRINITY_DN13847_c1_g1	0.81332	11.4876	-3.82011	2.65947e-06	5.6624e-05	down	cd08930, SDR_c8, classical (c) SDR, subgroup 8. This subgroup has a fairly well conserved active site tetrad and domain size of the classical SDRs, but has an atypical NAD-binding motif ([ST]G[GA]XGXXG). SDRs are a functionally diverse family of oxidoreductases that have a single domain with a structurally conserved Rossmann fold (alpha/beta folding pattern with a central beta-sheet), an NAD(P)(H…	pfam00106, adh_short, short chain dehydrogenase. This family contains a wide variety of dehydrogenases. 2.48e-20	-	KOG0725, KOG0725, KOG0725, Reductases with broad range of substrate specificities [General function prediction only]. 4.01e-15	sp|Q8KWT4|BACC_BACIU Dihydroanticapsin 7-dehydrogenase OS=Bacillus subtilis GN=bacC PE=1 SV=1 1.16e-15	-	CAF1483387.1 unnamed protein product [Adineta steineri] 1.25e-42	-
TRINITY_DN13530_c0_g1	1.53842	21.7135	-3.81907	1.01001e-12	9.23617e-11	down	-	-	-	-	-	-	-	-
TRINITY_DN9290_c0_g1	1.54958	21.8613	-3.81843	2.3992e-06	5.18644e-05	down	-	-	-	-	-	-	-	-
TRINITY_DN8646_c0_g1	5.93137	82.5521	-3.79887	2.59135e-05	0.000405648	down	cd01303, GDEase, Guanine deaminase (GDEase). Guanine deaminase is an aminohydrolase responsible for the conversion of guanine to xanthine and ammonia, the first step to utilize guanine as a nitrogen source. This reaction also removes the guanine base from the pool and therefore can play a role in the regulation of cellular GTP and the guanylate nucleotide pool. 2.01e-102	pfam01979, Amidohydro_1, Amidohydrolase family. This family of enzymes are a a large metal dependent hydrolase superfamily. The family includes Adenine deaminase EC:3.5.4.2 that hydrolyzes adenine to form hypoxanthine and ammonia. Adenine deaminases reaction is important for adenine utilisation as a purine and also as a nitrogen source. This family also includes dihydroorotase and N-acetylglucosa…	K01487-ko00230 Purine metabolism	KOG3968, KOG3968, KOG3968, Atrazine chlorohydrolase/guanine deaminase [Nucleotide transport and metabolism, Secondary metabolites biosynthesis, transport and catabolism]. 3.12e-97	sp|O14057|GUAD_SCHPO Probable guanine deaminase OS=Schizosaccharomyces pombe (strain 972 / ATCC 24843) GN=SPCC1672.03c PE=3 SV=1 3.28e-135	GO:0003674, molecular_function;GO:0003824, catalytic activity;GO:0005488, binding;GO:0005575, cellular_component;GO:0005622, intracellular;GO:0005623, cell;GO:0005737, cytoplasm;GO:0006139, nucleobase-containing compound metabolic process;GO:0006144, purine nucleobase metabolic process;GO:0006725, cellular aromatic compound metabolic process;GO:0006807, nitrogen compound metabolic process;GO:0008…	XP_050800159.1 guanine deaminase isoform X1 [Gopherus flavomarginatus] 9.16e-107	-
TRINITY_DN6948_c0_g1	5.02799	69.7036	-3.79318	5.26283e-06	0.000102444	down	cd08999, GH43_ABN-like, Glycosyl hydrolase family 43 protein such as endo-alpha-L-arabinanase. This glycosyl hydrolase family 43 (GH43) subgroup includes mostly enzymes with alpha-L-arabinofuranosidase (ABF; EC 3.2.1.55) and endo-alpha-L-arabinanase (ABN; EC 3.2.1.99) activities. These are inverting enzymes (i.e. they invert the stereochemistry of the anomeric carbon atom of the substrate) that h…	pfam04616, Glyco_hydro_43, Glycosyl hydrolases family 43. The glycosyl hydrolase family 43 contains members that are arabinanases. Arabinanases hydrolyze the alpha-1,5-linked L-arabinofuranoside backbone of plant cell wall arabinans. The structure of arabinanase Arb43A from Cellvibrio japonicus reveals a five-bladed beta-propeller fold. A long V-shaped groove, partially enclosed at one end, forms…	-	-	sp|Q2U1X8|ABNC_ASPOR Probable arabinan endo-1,5-alpha-L-arabinosidase C OS=Aspergillus oryzae (strain ATCC 42149 / RIB 40) GN=abnC PE=3 SV=1 1.63e-10	-	CAF1046305.1 unnamed protein product [Didymodactylos carnosus] >CAF3814180.1 unnamed protein product [Didymodactylos carnosus] 4.20e-11	-
TRINITY_DN6400_c0_g1	0.306304	4.24444	-3.79254	0.00874661	0.0441884	down	-	-	-	-	-	-	-	-
TRINITY_DN3436_c0_g1	8.20407	112.544	-3.778	1.41825e-12	1.27853e-10	down	-	-	-	-	-	-	-	-
TRINITY_DN9459_c0_g1	0.900691	12.3037	-3.77192	2.61875e-08	9.64839e-07	down	cd07492, Peptidases_S8_8, Peptidase S8 family domain, uncharacterized subfamily 8. This family is a member of the Peptidases S8 or Subtilases serine endo- and exo-peptidase clan. They have an Asp/His/Ser catalytic triad similar to that found in trypsin-like proteases, but do not share their three-dimensional structure and are not homologous to trypsin. The stability of subtilases may be enhanced …	-	-	-	-	-	-	-
TRINITY_DN10566_c0_g2	0.333892	4.55604	-3.77033	0.00736724	0.0388246	down	-	-	-	-	-	-	-	-
TRINITY_DN26872_c0_g1	4.22137	57.5565	-3.76919	3.13448e-06	6.46791e-05	down	-	-	-	-	-	-	-	-
TRINITY_DN14197_c1_g9	10.7451	146.316	-3.76733	2.45651e-06	5.29232e-05	down	-	-	-	-	-	-	-	-
TRINITY_DN10671_c0_g1	0.359881	4.8967	-3.76622	0.00327792	0.020906	down	-	pfam12138, Spherulin4, Spherulation-specific family 4. This protein is found in bacteria, archaea and eukaryotes. Proteins in this family are typically between 250 and 398 amino acids in length. There is a conserved NPG sequence motif and there are two completely conserved G residues that may be functionally important. Starvation will often induce spherulation - the production of spores - and thi…	-	-	-	-	-	-
TRINITY_DN25563_c0_g1	2.97696	40.4446	-3.76404	1.03744e-06	2.50226e-05	down	-	-	-	-	sp|Q00870|KHS_FUSSH Kievitone hydratase OS=Fusarium solani subsp. phaseoli GN=khs PE=1 SV=1 2.13e-41	-	-	-
TRINITY_DN7822_c0_g1	4.30188	58.4435	-3.764	1.08827e-06	2.60508e-05	down	-	pfam11885, DUF3405, Protein of unknown function (DUF3405). This family of proteins are functionally uncharacterized. This protein is found in bacteria and eukaryotes. Proteins in this family are typically between 636 to 810 amino acids in length. 3.12e-146	-	-	-	-	-	-
TRINITY_DN9209_c0_g1	4.79506	65.0999	-3.76303	1.00509e-06	2.43346e-05	down	-	-	-	-	-	-	-	-
TRINITY_DN3946_c0_g1	13.8372	187.833	-3.76283	3.04817e-07	8.31443e-06	down	-	-	-	-	-	-	-	-
TRINITY_DN8403_c0_g1	0.114902	1.55771	-3.76095	6.96627e-05	0.00093166	down	cd09008, MTAN, 5'-methylthioadenosine/S-adenosylhomocysteine nucleosidases. This subfamily includes both bacterial and plant 5'-methylthioadenosine/S-adenosylhomocysteine (MTA/SAH) nucleosidases (MTANs): bacterial MTANs show comparable efficiency in hydrolyzing MTA and SAH, while plant enzymes are highly specific for MTA and are unable to metabolize SAH or show significantly reduced activity towa…	pfam14441, OTT_1508_deam, OTT_1508-like deaminase. A member of the nucleic acid/nucleotide deaminase superfamily prototyped by Orientia OTT_1508. Members of this family are present in a wide phyletic range of bacteria,including several intracellular parasites and eukaryotes such as fungi, Leishmania, Selaginella, and some apicomplexa. In bacteria, these deaminases are predicted to function as tox…	-	-	-	-	XP_002734237.1 PREDICTED: uncharacterized protein LOC100369615 [Saccoglossus kowalevskii] 1.66e-30	-
TRINITY_DN4538_c0_g1	1.38507	18.5576	-3.74398	3.84518e-07	1.02251e-05	down	cd05362, THN_reductase-like_SDR_c, tetrahydroxynaphthalene/trihydroxynaphthalene reductase-like, classical (c) SDRs. 1,3,6,8-tetrahydroxynaphthalene reductase (4HNR) of Magnaporthe grisea and the related 1,3,8-trihydroxynaphthalene reductase (3HNR) are typical members of the SDR family containing the canonical glycine rich NAD(P)-binding site and active site tetrad, and function in fungal melanin…	pfam00106, adh_short, short chain dehydrogenase. This family contains a wide variety of dehydrogenases. 3.43e-23	-	KOG0725, KOG0725, KOG0725, Reductases with broad range of substrate specificities [General function prediction only]. 2.27e-31	sp|Q00791|STCU_EMENI Versicolorin reductase OS=Emericella nidulans (strain FGSC A4 / ATCC 38163 / CBS 112.46 / NRRL 194 / M139) GN=stcU PE=3 SV=2 1.93e-40	-	MCL4129315.1 hypothetical protein [Idotea baltica] 4.02e-36	-
TRINITY_DN8218_c0_g1	0.964409	12.8791	-3.73924	3.51042e-09	1.58532e-07	down	-	pfam00743, FMO-like, Flavin-binding monooxygenase-like. This family includes FMO proteins, cyclohexanone mono-oxygenase and a number of different mono-oxygenases. 2.63e-09	-	KOG1399, KOG1399, KOG1399, Flavin-containing monooxygenase [Secondary metabolites biosynthesis, transport and catabolism]. 3.16e-08	sp|Q9LMA1|FMO1_ARATH Probable flavin-containing monooxygenase 1 OS=Arabidopsis thaliana GN=FMO1 PE=2 SV=1 4.62e-15	-	CAF1460981.1 unnamed protein product [Adineta steineri] >CAF4105297.1 unnamed protein product [Adineta steineri] 1.27e-68	-
TRINITY_DN13945_c3_g4	0.531251	7.02062	-3.72413	0.000262824	0.00283356	down	-	-	-	-	-	-	BAE89680.1 unnamed protein product [Macaca fascicularis] 2.94e-16	Homo sapiens cysteine rich transmembrane BMP regulator 1 (CRIM1), mRNA 1.94e-76
TRINITY_DN11970_c0_g1	1.92678	25.4497	-3.72338	1.14069e-10	7.24965e-09	down	-	-	-	-	sp|D7PI11|GSFK_PENAE Short chain dehydrogenase gsfK OS=Penicillium aethiopicum GN=gsfK PE=1 SV=1 2.30e-14	-	CAF1164435.1 unnamed protein product [Rotaria sp. Silwood1] >CAF1638368.1 unnamed protein product [Rotaria sp. Silwood1] >CAF3927027.1 unnamed protein product [Rotaria sp. Silwood1] >CAF4983902.1 unnamed protein product [Rotaria sp. Silwood1] 1.15e-16	-
TRINITY_DN5325_c0_g1	1.24277	16.3841	-3.72067	3.38902e-06	6.97052e-05	down	-	-	-	-	-	-	-	-
TRINITY_DN8182_c0_g1	0.121125	1.59467	-3.71869	0.000974061	0.00809234	down	cd12148, fungal_TF_MHR, fungal transcription factor regulatory middle homology region. This domain is present in the large family of fungal zinc cluster transcription factors that contain an N-terminal GAL4-like C6 zinc binuclear cluster DNA-binding domain. Examples of members of this large fungal group are the following Saccharomyces cerevisiae transcription factors, GAL4, STB5, DAL81, CAT8, RDR…	-	-	-	sp|D7PHY7|VRTR2_PENAE Transcription factor vrtR2 OS=Penicillium aethiopicum GN=vrtR2 PE=1 SV=1 1.59e-15	GO:0008150, biological_process;GO:0008152, metabolic process;GO:0009058, biosynthetic process;GO:0009889, regulation of biosynthetic process;GO:0009891, positive regulation of biosynthetic process;GO:0009893, positive regulation of metabolic process;GO:0019222, regulation of metabolic process;GO:0019748, secondary metabolic process;GO:0043455, regulation of secondary metabolic process;GO:0044550,…	-	-
TRINITY_DN20785_c0_g1	0.159963	2.10515	-3.71811	0.0090336	0.0453141	down	-	pfam01593, Amino_oxidase, Flavin containing amine oxidoreductase. This family consists of various amine oxidases, including maze polyamine oxidase (PAO) and various flavin containing monoamine oxidases (MAO). The aligned region includes the flavin binding site of these enzymes. The family also contains phytoene dehydrogenases and related enzymes. In vertebrates MAO plays an important role regulat…	K13366-ko00410 beta-Alanine metabolism;ko00330 Arginine and proline metabolism	KOG0029, KOG0029, KOG0029, Amine oxidase [Secondary metabolites biosynthesis, transport and catabolism]. 1.70e-40	sp|O64411|PAO_MAIZE Polyamine oxidase OS=Zea mays GN=PAO PE=1 SV=1 8.42e-87	-	CAF4477725.1 unnamed protein product [Rotaria sp. Silwood2] 2.58e-127	-
TRINITY_DN4020_c0_g1	0.132296	1.73626	-3.71415	0.00360586	0.0225253	down	-	pfam07173, GRDP-like, Glycine-rich domain-containing protein-like. This entry includes Arabidopsis Glycine-rich domain- containing protein 1 and 2 (GRDP1/2). They are involved in development and stress responses. 1.82e-07	-	-	sp|Q9ZQ47|GRDP1_ARATH Glycine-rich domain-containing protein 1 OS=Arabidopsis thaliana GN=GRDP1 PE=2 SV=1 1.07e-07	-	KAJ3030315.1 hypothetical protein HDU68_009468 [Siphonaria sp. JEL0065] 1.05e-24	-
TRINITY_DN10425_c0_g1	0.624104	8.17837	-3.71196	0.00106605	0.00872543	down	-	-	-	-	-	-	-	-
TRINITY_DN23739_c0_g1	0.574806	7.51907	-3.70941	2.31167e-05	0.000365923	down	cd17363, MFS_SV2, Synaptic vesicle glycoprotein 2 of the Major Facilitator Superfamily of transporters. Synaptic vesicle glycoprotein 2 (SV2) is a transporter-like integral membrane glycoprotein, with 12 transmembrane regions, expressed in vertebrates and is localized to synaptic and endocrine secretory vesicles. Three isoforms have been identified, SV2A, SV2B, and SV2C. SV2A and SV2B are widely …	-	-	KOG0253, KOG0253, KOG0253, Synaptic vesicle transporter SV2 (major facilitator superfamily) [General function prediction only]. 2.02e-66	sp|Q9C101|YKT8_SCHPO Uncharacterized MFS-type transporter PB1E7.08c OS=Schizosaccharomyces pombe (strain 972 / ATCC 24843) GN=SPAPB1E7.08c PE=1 SV=1 1.66e-111	-	CAF0840292.1 unnamed protein product [Didymodactylos carnosus] >CAF3627633.1 unnamed protein product [Didymodactylos carnosus] 4.74e-101	-
TRINITY_DN12310_c0_g2	3.72612	48.6776	-3.70751	2.11155e-06	4.61167e-05	down	-	-	-	-	sp|O67071|Y928_AQUAE Uncharacterized protein aq_928 OS=Aquifex aeolicus (strain VF5) GN=aq_928 PE=3 SV=1 2.81e-27	-	CAF1257306.1 unnamed protein product [Adineta ricciae] >CAF1456721.1 unnamed protein product [Adineta ricciae] 2.44e-36	-
TRINITY_DN7867_c0_g1	1.33447	17.2851	-3.6952	1.11495e-05	0.000198212	down	-	-	-	-	sp|P07248|ADR1_YEAST Regulatory protein ADR1 OS=Saccharomyces cerevisiae (strain ATCC 204508 / S288c) GN=ADR1 PE=1 SV=2 5.18e-06	-	-	-
TRINITY_DN7972_c0_g1	0.211455	2.73023	-3.6906	0.00411237	0.0248916	down	-	-	-	-	-	-	-	-
TRINITY_DN10804_c0_g1	4.53774	58.5336	-3.68922	4.53909e-07	1.18473e-05	down	-	-	-	-	-	-	-	-
TRINITY_DN12775_c0_g1	19.6652	252.575	-3.68299	2.00689e-05	0.000325793	down	-	pfam06985, HET, Heterokaryon incompatibility protein (HET). This family represents a conserved region approximately 150 residues long within various heterokaryon incompatibility proteins that seem to be restricted to ascomycete fungi. Genetic differences in specific het genes prevent a viable heterokaryotic fungal cell from being formed by the fusion of filaments from two different wild-type stra…	-	-	sp|Q9UV10|HET6_NEUCR Heterokaryon incompatibility protein 6, OR allele OS=Neurospora crassa (strain ATCC 24698 / 74-OR23-1A / CBS 708.71 / DSM 1257 / FGSC 987) GN=het-6 PE=4 SV=1 4.62e-08	-	KAI1691421.1 heterokaryon incompatibility protein (HET) domain-containing protein [Ditylenchus destructor] 7.79e-23	-
TRINITY_DN14008_c0_g1	0.543928	6.98156	-3.68206	0.000794507	0.00697443	down	-	-	-	-	-	-	-	-
TRINITY_DN14181_c2_g4	0.375332	4.79659	-3.67577	2.48925e-06	5.34474e-05	down	-	-	-	-	-	-	-	-
TRINITY_DN10846_c0_g1	2.91128	37.2035	-3.67571	6.1504e-05	0.000838817	down	cd00833, PKS, polyketide synthases (PKSs) polymerize simple fatty acids into a large variety of different products, called polyketides, by successive decarboxylating Claisen condensations. PKSs can be divided into 2 groups, modular type I PKSs consisting of one or more large multifunctional proteins and iterative type II PKSs, complexes of several monofunctional subunits. 4.79e-76	pfam00109, ketoacyl-synt, Beta-ketoacyl synthase, N-terminal domain. The structure of beta-ketoacyl synthase is similar to that of the thiolase family (pfam00108) and also chalcone synthase. The active site of beta-ketoacyl synthase is located between the N and C-terminal domains. The N-terminal domain contains most of the structures involved in dimer formation and also the active site cysteine. …	-	KOG1202, KOG1202, KOG1202, Animal-type fatty acid synthase and related proteins [Lipid transport and metabolism]. 3.12e-07	sp|D7PHZ2|VRTA_PENAE Non-reducing polyketide synthase vrtA OS=Penicillium aethiopicum GN=vrtA PE=1 SV=1 6.27e-08	GO:0006082, organic acid metabolic process;GO:0006725, cellular aromatic compound metabolic process;GO:0006732, coenzyme metabolic process;GO:0008150, biological_process;GO:0008152, metabolic process;GO:0009058, biosynthetic process;GO:0009108, coenzyme biosynthetic process;GO:0009403, toxin biosynthetic process;GO:0009404, toxin metabolic process;GO:0009987, cellular process;GO:0016053, organic …	CAF1473328.1 unnamed protein product [Adineta ricciae] 3.92e-238	-
TRINITY_DN25303_c0_g1	0.480792	6.13129	-3.67271	0.00968874	0.0477339	down	-	-	-	-	-	-	-	-
TRINITY_DN10466_c0_g1	179.644	2287.1	-3.67031	7.1756e-07	1.80612e-05	down	-	-	-	-	-	-	-	-
TRINITY_DN25627_c0_g1	0.17655	2.24231	-3.66684	0.00149051	0.0114893	down	-	-	-	-	-	-	-	-
TRINITY_DN10523_c0_g1	7.79919	98.2412	-3.65493	1.34914e-07	3.99743e-06	down	-	-	-	-	-	-	-	-
TRINITY_DN1074_c0_g1	0.347923	4.38029	-3.65419	0.001666	0.0125083	down	-	pfam11625, DUF3253, Protein of unknown function (DUF3253). This bacterial family of proteins has no known function. 1.96e-11	-	-	-	-	GAV03337.1 hypothetical protein RvY_13777-2 [Ramazzottius varieornatus] 1.62e-07	-
TRINITY_DN9198_c0_g1	1.02594	12.8066	-3.64187	4.48396e-07	1.17517e-05	down	-	-	-	-	-	-	-	-
TRINITY_DN13861_c0_g2	0.480602	5.97113	-3.63509	4.45676e-05	0.00063939	down	-	-	-	-	-	-	-	-
TRINITY_DN3387_c0_g1	3.07539	38.1904	-3.63437	5.53151e-07	1.42619e-05	down	-	-	-	-	-	-	-	-
TRINITY_DN13777_c4_g2	232.605	2875.5	-3.62786	1.09731e-06	2.61688e-05	down	-	-	-	-	-	-	-	-
TRINITY_DN10885_c0_g1	2.88049	35.5105	-3.62386	5.01661e-11	3.42829e-09	down	cd05227, AR_SDR_e, aldehyde reductase, extended (e) SDRs. This subgroup contains aldehyde reductase of the extended SDR-type and related proteins. Aldehyde reductase I (aka carbonyl reductase) is an NADP-binding SDR; it has an NADP-binding motif consensus that is slightly different from the canonical SDR form and lacks the Asn of the extended SDR active site tetrad. Aldehyde reductase I catalyzes…	-	-	KOG1502, KOG1502, KOG1502, Flavonol reductase/cinnamoyl-CoA reductase [Defense mechanisms]. 3.92e-37	sp|Q9UT59|YKJ7_SCHPO Putative uncharacterized oxidoreductase C513.07 OS=Schizosaccharomyces pombe (strain 972 / ATCC 24843) GN=SPAC513.07 PE=3 SV=1 6.14e-51	-	CAF1322996.1 unnamed protein product [Rotaria sordida] >CAF1389592.1 unnamed protein product [Rotaria sordida] >CAF1586961.1 unnamed protein product [Rotaria sordida] >CAF3979869.1 unnamed protein product [Rotaria sordida] 4.66e-45	-
TRINITY_DN19360_c0_g1	0.242917	2.98808	-3.62068	0.00425341	0.025599	down	sd00038, Kelch, Kelch repeat. Kelch repeats are 44 to 56 amino acids in length and form a four-stranded beta-sheet corresponding to a single blade of five to seven bladed beta propellers. The Kelch superfamily is a large evolutionary conserved protein family whose members are present throughout the cell and extracellularly, and have diverse activities. Kelch repeats are often in combination with …	pfam13418, Kelch_4, Galactose oxidase, central domain. 2.63e-07	-	KOG0379, KOG0379, KOG0379, Kelch repeat-containing proteins [General function prediction only]. 3.31e-17	sp|Q93XW5|NSP5_ARATH Nitrile-specifier protein 5 OS=Arabidopsis thaliana GN=NSP5 PE=2 SV=1 2.59e-34	-	XP_013392224.1 nitrile-specifier protein 5-like [Lingula anatina] 1.12e-37	-
TRINITY_DN366_c0_g2	0.946576	11.6379	-3.61997	0.00288824	0.0190417	down	-	-	-	-	-	-	-	-
TRINITY_DN8894_c0_g2	0.185029	2.26833	-3.61581	0.00119178	0.00957568	down	-	-	-	-	-	-	-	-
TRINITY_DN12357_c0_g3	0.248868	3.0445	-3.61275	0.004189	0.0253072	down	-	-	-	-	-	-	-	-
TRINITY_DN7184_c0_g1	72.8723	888.245	-3.60752	2.90925e-05	0.000446613	down	-	-	-	-	-	-	-	-
TRINITY_DN10677_c0_g1	66.2046	798.255	-3.59185	7.48857e-05	0.000989471	down	-	-	-	-	-	-	-	-
TRINITY_DN13133_c0_g1	17.9358	215.687	-3.58802	1.11722e-09	5.70319e-08	down	cd00078, HECTc, HECT domain; C-terminal catalytic domain of a subclass of Ubiquitin-protein ligase (E3). It binds specific ubiquitin-conjugating enzymes (E2), accepts ubiquitin from E2, transfers ubiquitin to substrate lysine side chains, and transfers additional ubiquitin molecules to the end of growing ubiquitin chains. 4.49e-74	pfam00632, HECT, HECT-domain (ubiquitin-transferase). The name HECT comes from Homologous to the E6-AP Carboxyl Terminus. 2.42e-64	-	KOG0941, KOG0941, KOG0941, E3 ubiquitin protein ligase [Posttranslational modification, protein turnover, chaperones]. 3.28e-112	sp|O94275|MUG30_SCHPO Probable E3 ubiquitin-protein ligase mug30 OS=Schizosaccharomyces pombe (strain 972 / ATCC 24843) GN=mug30 PE=1 SV=1 9.23e-118	GO:0003674, molecular_function;GO:0003824, catalytic activity;GO:0004842, ubiquitin-protein transferase activity;GO:0005575, cellular_component;GO:0005622, intracellular;GO:0005623, cell;GO:0005628, prospore membrane;GO:0005737, cytoplasm;GO:0006464, cellular protein modification process;GO:0006807, nitrogen compound metabolic process;GO:0008150, biological_process;GO:0008152, metabolic process;G…	XP_039301583.1 LOW QUALITY PROTEIN: probable E3 ubiquitin-protein ligase mug30 [Nilaparvata lugens] 2.27e-253	-
TRINITY_DN3467_c0_g1	39.375	473.1	-3.58679	6.50276e-14	7.58317e-12	down	-	-	-	-	-	-	-	-
TRINITY_DN6982_c0_g1	0.457527	5.49617	-3.5865	0.00020879	0.00234654	down	-	-	-	-	-	-	-	-
TRINITY_DN13589_c0_g1	0.618386	7.42811	-3.58642	4.50299e-07	1.17773e-05	down	-	-	-	-	-	-	CAF3300523.1 unnamed protein product [Rotaria sp. Silwood2] >CAF4156471.1 unnamed protein product [Rotaria sp. Silwood2] >CAF4269864.1 unnamed protein product [Rotaria sp. Silwood2] 2.61e-11	-
TRINITY_DN20935_c0_g1	0.169427	2.01906	-3.57494	0.00338568	0.0213893	down	cd05120, APH_ChoK_like, Aminoglycoside 3'-phosphotransferase and Choline Kinase family. This family is composed of APH, ChoK, ethanolamine kinase (ETNK), macrolide 2'-phosphotransferase (MPH2'), an unusual homoserine kinase, and uncharacterized proteins with similarity to the N-terminal domain of acyl-CoA dehydrogenase 10 (ACAD10). The members of this family catalyze the transfer of the gamma-pho…	-	-	-	-	-	-	-
TRINITY_DN6974_c0_g1	0.504926	6.00889	-3.57296	6.44258e-06	0.000121863	down	-	pfam02836, Glyco_hydro_2_C, Glycosyl hydrolases family 2, TIM barrel domain. This family contains beta-galactosidase, beta-mannosidase and beta-glucuronidase activities. 3.55e-50	K01195-ko00944 Flavone and flavonol biosynthesis;ko00860 Porphyrin and chlorophyll metabolism;ko00531 Glycosaminoglycan degradation;ko04142 Lysosome;ko00040 Pentose and glucuronate interconversions;ko00500 Starch and sucrose metabolism;ko00983 Drug metabolism - other enzymes	KOG2024, KOG2024, KOG2024, Beta-Glucuronidase GUSB (glycosylhydrolase superfamily 2) [Carbohydrate transport and metabolism]. 4.63e-35	sp|P05804|BGLR_ECOLI Beta-glucuronidase OS=Escherichia coli (strain K12) GN=uidA PE=1 SV=2 0.0	-	KAF6734136.1 Beta-glucuronidase [Oryzias melastigma] 9.28e-160	-
TRINITY_DN12357_c0_g1	0.47555	5.64555	-3.56945	7.90838e-05	0.00103632	down	-	-	-	-	-	-	-	-
TRINITY_DN13085_c0_g1	29.1804	345.467	-3.56548	3.84943e-09	1.71685e-07	down	cd05474, SAP_like, SAPs, pepsin-like proteinases secreted from pathogens to degrade host proteins. SAPs (Secreted aspartic proteinases) are secreted from a group of pathogenic fungi, predominantly Candida species. They are secreted from the pathogen to degrade host proteins. SAP is one of the most significant extracellular hydrolytic enzymes produced by C. albicans. SAP proteins, encoded by a fam…	pfam00026, Asp, Eukaryotic aspartyl protease. Aspartyl (acid) proteases include pepsins, cathepsins, and renins. Two-domain structure, probably arising from ancestral duplication. This family does not include the retroviral nor retrotransposon proteases (pfam00077), which are much smaller and appear to be homologous to a single domain of the eukaryotic asp proteases. 2.12e-29	-	KOG3378, KOG3378, KOG3378, Hemoglobin-like flavoprotein [Energy production and conversion]. 1.76e-33	sp|Q7WUM8|HMP_RHIME Flavohemoprotein OS=Rhizobium meliloti (strain 1021) GN=hmp PE=3 SV=2 1.99e-72	-	GFR71550.1 flavohemoprotein [Elysia marginata] 2.58e-60	-
TRINITY_DN18386_c0_g1	0.668906	7.87017	-3.55652	3.12095e-05	0.000475665	down	-	-	-	-	-	-	-	-
TRINITY_DN11997_c0_g1	4.0577	47.675	-3.5545	2.47726e-08	9.20717e-07	down	cd11010, S1-P1_nuclease, S1/P1 nucleases and related enzymes. This family summarizes both S1 and P1 nucleases (EC:3.1.30.1) which cleave RNA and single stranded DNA with no base specificity. S1 nuclease is more active on DNA than RNA. Its reaction products are oligonucleotides or single nucleotides with 5' phosphoryl groups. Although its primary substrate is single-stranded, it may also introduce…	pfam02265, S1-P1_nuclease, S1/P1 Nuclease. This family contains both S1 and P1 nucleases (EC:3.1.30.1) which cleave RNA and single stranded DNA with no base specificity. 3.89e-07	-	KOG0029, KOG0029, KOG0029, Amine oxidase [Secondary metabolites biosynthesis, transport and catabolism]. 1.22e-07	sp|P46882|AOFN_ASPNG Monoamine oxidase N OS=Aspergillus niger GN=maoN PE=1 SV=1 1.64e-176	-	CAF0953197.1 unnamed protein product [Adineta ricciae] 8.07e-36	-
TRINITY_DN8222_c0_g1	0.129142	1.50765	-3.54527	0.00630123	0.0345684	down	-	-	-	-	sp|O22025|CFXQ_CYAM1 Protein cfxQ homolog OS=Cyanidioschyzon merolae (strain 10D) GN=cfxQ PE=3 SV=2 1.51e-29	-	XP_018913755.1 PREDICTED: uncharacterized protein LOC109041790, partial [Bemisia tabaci] 1.20e-148	-
TRINITY_DN9904_c0_g2	0.185994	2.16571	-3.54151	0.00742709	0.0390591	down	cd11051, CYP59-like, cytochrome P450 family 59 and similar cytochrome P450s. This family is composed of Aspergillus nidulans cytochrome P450 59 (CYP59), also called sterigmatocystin biosynthesis P450 monooxygenase stcS, and similar fungal proteins. CYP59 is required for the conversion of versicolorin A to sterigmatocystin. This family belongs to the large cytochrome P450 (P450, CYP) superfamily o…	pfam00067, p450, Cytochrome P450. Cytochrome P450s are haem-thiolate proteins involved in the oxidative degradation of various compounds. They are particularly well known for their role in the degradation of environmental toxins and mutagens. They can be divided into 4 classes, according to the method by which electrons from NAD(P)H are delivered to the catalytic site. Sequence conservation is re…	-	KOG0158, KOG0158, KOG0158, Cytochrome P450 CYP3/CYP5/CYP6/CYP9 subfamilies [Secondary metabolites biosynthesis, transport and catabolism]. 2.53e-19	sp|Q00714|STCS_EMENI Probable sterigmatocystin biosynthesis P450 monooxygenase stcS OS=Emericella nidulans (strain FGSC A4 / ATCC 38163 / CBS 112.46 / NRRL 194 / M139) GN=stcS PE=1 SV=2 5.15e-74	-	XP_009059584.1 hypothetical protein LOTGIDRAFT_218629 [Lottia gigantea] >ESO89799.1 hypothetical protein LOTGIDRAFT_218629 [Lottia gigantea] 3.39e-21	-
TRINITY_DN5097_c0_g1	3.13459	36.4963	-3.5414	0.00191314	0.0137857	down	-	-	-	-	-	-	-	-
TRINITY_DN11498_c0_g1	16.3031	188.806	-3.53369	1.13557e-06	2.69294e-05	down	-	-	-	-	-	-	-	-
TRINITY_DN15988_c0_g1	0.177945	2.06031	-3.53336	0.00360545	0.0225253	down	cd11482, SLC-NCS1sbd_NRT1-like, nucleobase-cation-symport-1 (NCS1) transporter NRT1-like; solute-binding domain. This fungal NCS1 subfamily includes various Saccharomyces cerevisiae transporters: nicotinamide riboside transporter 1 (Nrt1p, also called Thi71p), Dal4p (allantoin permease), Fui1p (uridine permease), Fur4p (uracil permease), and Thi7p (thiamine transporter). NCS1s are essential compo…	pfam02133, Transp_cyt_pur, Permease for cytosine/purines, uracil, thiamine, allantoin. 3.26e-71	-	KOG2466, KOG2466, KOG2466, Uridine permease/thiamine transporter/allantoin transport [Nucleotide transport and metabolism, Coenzyme transport and metabolism]. 3.09e-113	sp|O14035|YEME_SCHPO Uncharacterized permease C29B12.14c OS=Schizosaccharomyces pombe (strain 972 / ATCC 24843) GN=SPAC29B12.14c PE=3 SV=2 3.58e-101	-	CAF1078916.1 unnamed protein product [Adineta steineri] >CAF1105179.1 unnamed protein product [Adineta steineri] >CAF3737666.1 unnamed protein product [Adineta steineri] >CAF3793724.1 unnamed protein product [Adineta steineri] 5.05e-100	-
TRINITY_DN8132_c0_g1	0.853311	9.84896	-3.52883	0.000123755	0.00150557	down	-	-	-	-	-	-	-	-
TRINITY_DN8272_c0_g1	0.316173	3.63732	-3.52409	0.000145048	0.00172955	down	cd09596, M36, Peptidase M36 family, also known as fungalysin family. The M36 peptidase family, also known as fungalysin (elastinolytic metalloproteinase) family, includes endopeptidases from pathogenic fungi. Fungalysin can hydrolyze extracellular matrix proteins such as elastin and keratin, with a preference for cleavage on the amino side of hydrophobic residues with bulky side-chains. This fami…	pfam02128, Peptidase_M36, Fungalysin metallopeptidase (M36). 2.25e-151	-	-	sp|E3QKL1|MEP_COLGM Extracellular metalloproteinase mep OS=Colletotrichum graminicola (strain M1.001 / M2 / FGSC 10212) GN=mep PE=2 SV=1 0.0	GO:0005575, cellular_component;GO:0005576, extracellular region	KAJ3007428.1 Fungalysin/Thermolysin Extracellular metalloproteinase 5 [Siphonaria sp. JEL0065] 6.47e-103	-
TRINITY_DN4993_c0_g1	0.782561	8.99129	-3.52225	0.00754951	0.0395393	down	-	-	-	-	-	-	-	-
TRINITY_DN14149_c0_g1	0.921684	10.4843	-3.50781	5.83222e-09	2.47111e-07	down	-	pfam01083, Cutinase, Cutinase. 2.35e-08	-	-	sp|O59893|AXE2_TALPU Acetylxylan esterase 2 OS=Talaromyces purpureogenus GN=axe-2 PE=1 SV=1 3.43e-14	-	-	-
TRINITY_DN159_c0_g2	0.128583	1.46	-3.5052	0.00784187	0.0407015	down	-	-	-	-	-	-	-	-
TRINITY_DN5478_c0_g1	0.302077	3.41623	-3.49942	0.00191038	0.0137814	down	-	-	-	-	-	-	-	-
TRINITY_DN10627_c0_g1	15.5652	175.499	-3.49507	7.1991e-07	1.80845e-05	down	-	-	-	-	-	-	-	-
TRINITY_DN8461_c0_g1	3.32951	37.5195	-3.49426	3.82234e-09	1.71077e-07	down	-	pfam14328, DUF4385, Domain of unknown function (DUF4385). This family of proteins is functionally uncharacterized. This family of proteins is found in bacteria, archaea, eukaryotes and viruses. Proteins in this family are typically between 149 and 163 amino acids in length. 7.12e-39	-	-	-	-	CAF3474635.1 unnamed protein product [Rotaria sp. Silwood1] >CAF3475535.1 unnamed protein product [Rotaria sp. Silwood1] >CAF4665644.1 unnamed protein product [Rotaria sp. Silwood1] >CAF4996665.1 unnamed protein product [Rotaria sp. Silwood1] 1.46e-28	-
TRINITY_DN7392_c0_g1	0.574435	6.4152	-3.48128	0.00327594	0.0209038	down	-	-	-	-	-	-	-	-
TRINITY_DN10434_c0_g1	0.982935	10.9547	-3.47832	1.63185e-06	3.704e-05	down	-	-	-	-	-	-	-	-
TRINITY_DN9299_c0_g1	0.609149	6.75724	-3.47157	0.00193766	0.0139229	down	-	-	-	-	-	-	-	-
TRINITY_DN14854_c0_g1	0.693882	7.66604	-3.46572	0.000254116	0.00275603	down	-	pfam05163, DinB, DinB family. DNA damage-inducible (din) genes in Bacillus subtilis are coordinately regulated and together compose a global regulatory network that has been termed the SOS-like or SOB regulon. This family includes DinB from B. subtilis. 1.15e-09	-	-	sp|O07939|YIST_BACSU Uncharacterized protein YisT OS=Bacillus subtilis (strain 168) GN=yisT PE=3 SV=1 1.05e-08	-	KAI5930740.1 hypothetical protein MM560_G965n3 [Manis javanica] 3.19e-17	-
TRINITY_DN11633_c0_g1	2.02787	22.3473	-3.46206	0.000223217	0.00248017	down	-	-	-	-	-	-	-	-
TRINITY_DN14522_c0_g1	0.414907	4.51585	-3.44414	0.000803195	0.00703612	down	cd02892, SQCY_1, Squalene cyclase (SQCY) domain subgroup 1; found in class II terpene cyclases that have an alpha 6 - alpha 6 barrel fold. Squalene cyclase (SQCY) and 2,3-oxidosqualene cyclase (OSQCY) are integral membrane proteins that catalyze a cationic cyclization cascade converting linear triterpenes to fused ring compounds. This group contains bacterial SQCY which catalyzes the convertion o…	pfam13243, SQHop_cyclase_C, Squalene-hopene cyclase C-terminal domain. Squalene-hopene cyclase, EC:5.4.99.17, catalyzes the cyclisation of squalene into hopene in bacteria. This reaction is part of a cationic cyclisation cascade, which is homologous to a key step in cholesterol biosynthesis. This family is the C-terminal half of the molecule. 9.71e-43	K06045-ko00909 Sesquiterpenoid and triterpenoid biosynthesis	KOG0497, KOG0497, KOG0497, Oxidosqualene-lanosterol cyclase and related proteins [Lipid transport and metabolism]. 4.09e-07	sp|P33247|SQHC_ALIAD Squalene--hopene cyclase OS=Alicyclobacillus acidocaldarius subsp. acidocaldarius (strain ATCC 27009 / DSM 446 / JCM 5260 / NBRC 15652 / NCIMB 11725 / NRRL B-14509 / 104-1A) GN=shc PE=1 SV=4 6.71e-42	-	MCL4139138.1 hypothetical protein [Idotea baltica] 1.74e-37	-
TRINITY_DN13841_c1_g3	12.0821	131.453	-3.4436	0.000139531	0.00166846	down	-	-	-	-	-	-	-	-
TRINITY_DN9878_c0_g2	7.60247	82.6411	-3.44232	1.06129e-05	0.000190269	down	-	pfam09994, DUF2235, Uncharacterized alpha/beta hydrolase domain (DUF2235). This domain, found in various hypothetical bacterial proteins, has no known function. 1.53e-38	-	-	sp|P39992|YEC3_YEAST Uncharacterized protein YEL023C OS=Saccharomyces cerevisiae (strain ATCC 204508 / S288c) GN=YEL023C PE=4 SV=1 5.56e-09	-	KAJ3003805.1 hypothetical protein HDU68_005497 [Siphonaria sp. JEL0065] 1.09e-22	-
TRINITY_DN16287_c0_g1	9.90744	107.556	-3.44044	4.2124e-09	1.84e-07	down	cd19077, AKR_AKR8A1-2, AKR8A family of aldo-keto reductase (AKR). Schizosaccharomyces pombe PLR and PLR2 are founding members of aldo-keto reductase family 8 member A1-2 (AKR8A1-2), respectively. PLR (EC 1.1.1.65), also called PL reductase (PL-red), catalyzes the reduction of pyridoxal (PL) with NADPH and oxidation of pyridoxine (PN) with NADP(+). 6.64e-110	pfam00248, Aldo_ket_red, Aldo/keto reductase family. This family includes a number of K+ ion channel beta chain regulatory domains - these are reported to have oxidoreductase activity. 1.33e-33	K05275-ko00750 Vitamin B6 metabolism	KOG1575, KOG1575, KOG1575, Voltage-gated shaker-like K+ channel, subunit beta/KCNAB [Energy production and conversion]. 1.05e-38	sp|O14295|PLR1_SCHPO Pyridoxal reductase OS=Schizosaccharomyces pombe (strain 972 / ATCC 24843) GN=plr1 PE=1 SV=1 1.02e-88	GO:0005575, cellular_component;GO:0005622, intracellular;GO:0005623, cell;GO:0005634, nucleus;GO:0005737, cytoplasm;GO:0043226, organelle;GO:0043227, membrane-bounded organelle;GO:0043229, intracellular organelle;GO:0043231, intracellular membrane-bounded organelle;GO:0044424, intracellular part;GO:0044464, cell part	CAF1227730.1 unnamed protein product [Didymodactylos carnosus] >CAF1227732.1 unnamed protein product [Didymodactylos carnosus] >CAF1267540.1 unnamed protein product [Didymodactylos carnosus] >CAF3990563.1 unnamed protein product [Didymodactylos carnosus] >CAF3990580.1 unnamed protein product [Didymodactylos carnosus] 1.22e-102	-
TRINITY_DN13602_c0_g1	151.882	1640.33	-3.43296	1.16108e-07	3.51392e-06	down	-	-	-	-	-	-	-	-
TRINITY_DN3463_c0_g1	0.39758	4.27808	-3.42765	0.000667007	0.00608638	down	-	-	-	-	-	-	XP_037038162.1 uncharacterized protein LOC119075726 [Bradysia coprophila] >XP_037038163.1 uncharacterized protein LOC119075726 [Bradysia coprophila] 9.84e-38	-
TRINITY_DN14091_c3_g1	13.9205	149.397	-3.42387	2.09189e-10	1.28454e-08	down	-	-	-	-	sp|G0S4F3|NUP82_CHATD Nucleoporin NUP82 OS=Chaetomium thermophilum (strain DSM 1495 / CBS 144.50 / IMI 039719) GN=NUP82 PE=1 SV=1 7.15e-14	-	KAJ3016461.1 hypothetical protein HDU68_012211 [Siphonaria sp. JEL0065] 2.44e-12	-
TRINITY_DN7659_c0_g1	1.1276	12.0451	-3.41712	1.20859e-05	0.000213366	down	-	pfam01408, GFO_IDH_MocA, Oxidoreductase family, NAD-binding Rossmann fold. This family of enzymes utilize NADP or NAD. This family is called the GFO/IDH/MOCA family in swiss-prot. 3.43e-12	-	KOG2741, KOG2741, KOG2741, Dimeric dihydrodiol dehydrogenase [Carbohydrate transport and metabolism, Secondary metabolites biosynthesis, transport and catabolism]. 3.45e-15	sp|P04387|GAL80_YEAST Galactose/lactose metabolism regulatory protein GAL80 OS=Saccharomyces cerevisiae (strain ATCC 204508 / S288c) GN=GAL80 PE=1 SV=2 4.12e-32	-	CAF3098352.1 unnamed protein product [Rotaria sp. Silwood2] >CAF4106239.1 unnamed protein product [Rotaria sp. Silwood2] 1.96e-54	-
TRINITY_DN8940_c0_g1	0.629663	6.71575	-3.4149	7.6782e-05	0.00101033	down	cd11058, CYP60B-like, cytochrome P450 family 60, subfamily B and similar cytochrome P450s. This family is composed of fungal cytochrome P450s including: Aspergillus nidulans cytochrome P450 60B (CYP60B), also called versicolorin B desaturase, which catalyzes the conversion of versicolorin B to versicolorin A during sterigmatocystin biosynthesis; Fusarium sporotrichioides cytochrome P450 65A1 (CYP…	pfam00067, p450, Cytochrome P450. Cytochrome P450s are haem-thiolate proteins involved in the oxidative degradation of various compounds. They are particularly well known for their role in the degradation of environmental toxins and mutagens. They can be divided into 4 classes, according to the method by which electrons from NAD(P)H are delivered to the catalytic site. Sequence conservation is re…	-	KOG0158, KOG0158, KOG0158, Cytochrome P450 CYP3/CYP5/CYP6/CYP9 subfamilies [Secondary metabolites biosynthesis, transport and catabolism]. 9.99e-33	sp|O13317|TRI11_FUSSP Isotrichodermin C-15 hydroxylase OS=Fusarium sporotrichioides GN=TRI11 PE=3 SV=1 2.33e-90	-	KAG7316189.1 hypothetical protein KOW79_021055 [Hemibagrus wyckioides] 5.25e-34	-
TRINITY_DN14087_c1_g1	13.0221	138.801	-3.41398	2.95177e-15	4.41412e-13	down	-	pfam14856, Hce2, Pathogen effector; putative necrosis-inducing factor. The domain corresponds to the mature part of the Ecp2 effector protein from the tomato pathogen Cladopsorium fulvum. Effectors are low molecular weight proteins that are secreted by bacteria, oomycetes and fungi to manipulate their hosts and adapt to their environment. Ecp2 is a 165 amino acid secreted protein that was origina…	-	-	sp|B6HRH5|PRTT_PENRW Transcriptional activator of proteases prtT OS=Penicillium rubens (strain ATCC 28089 / DSM 1075 / NRRL 1951 / Wisconsin 54-1255) GN=prtT PE=3 SV=1 2.53e-06	-	CAF1064601.1 unnamed protein product [Didymodactylos carnosus] >CAF1259285.1 unnamed protein product [Didymodactylos carnosus] >CAF3829743.1 unnamed protein product [Didymodactylos carnosus] >CAF4035373.1 unnamed protein product [Didymodactylos carnosus] 1.98e-12	-
TRINITY_DN14026_c0_g2	0.948755	10.0923	-3.41108	7.67581e-05	0.00101033	down	-	pfam01977, UbiD, 3-octaprenyl-4-hydroxybenzoate carboxy-lyase. This family has been characterized as 3-octaprenyl-4- hydroxybenzoate carboxy-lyase enzymes. This enzyme catalyzes the third reaction in ubiquinone biosynthesis. For optimal activity the carboxy-lase was shown to require Mn2+. 2.18e-61	K20039-ko00940 Phenylpropanoid biosynthesis	-	sp|A2QHE5|FDC1_ASPNC Ferulic acid decarboxylase 1 OS=Aspergillus niger (strain CBS 513.88 / FGSC A1513) GN=fdc1 PE=1 SV=1 0.0	-	ELT95516.1 hypothetical protein CAPTEDRAFT_190757 [Capitella teleta] 7.56e-46	-
TRINITY_DN13539_c0_g1	65.4242	689.794	-3.39827	5.66923e-05	0.000781579	down	-	-	-	-	-	-	-	-
TRINITY_DN11295_c0_g1	11.3749	119.362	-3.39142	3.45352e-05	0.000515231	down	-	-	-	-	-	-	-	-
TRINITY_DN12646_c0_g1	0.576835	6.04079	-3.38851	0.00395619	0.0241881	down	-	-	-	-	-	-	CAF5026796.1 unnamed protein product, partial [Rotaria sp. Silwood1] 2.67e-07	-
TRINITY_DN9054_c0_g1	0.69043	7.22881	-3.38819	2.52066e-05	0.000396535	down	-	pfam10282, Lactonase, Lactonase, 7-bladed beta-propeller. This entry contains bacterial 6-phosphogluconolactonases (6PGL)YbhE-type (EC:3.1.1.31) which hydrolyze 6-phosphogluconolactone to 6-phosphogluconate. The entry also contains the fungal muconate lactonising enzyme carboxy-cis,cis-muconate cyclase (EC:5.5.1.5) and muconate cycloisomerase (EC:5.5.1.1), which convert cis,cis-muconates to mucon…	K14334-ko00362 Benzoate degradation	-	sp|P38677|CMLE_NEUCR Carboxy-cis,cis-muconate cyclase OS=Neurospora crassa (strain ATCC 24698 / 74-OR23-1A / CBS 708.71 / DSM 1257 / FGSC 987) GN=NCU04071 PE=1 SV=3 1.48e-42	-	-	-
TRINITY_DN13982_c0_g1	0.9894	10.3485	-3.38673	1.71196e-05	0.000285274	down	cd12453, RRM1_RIM4_like, RNA recognition motif 1 (RRM1) found in yeast meiotic activator RIM4 and similar proteins. This subfamily corresponds to the RRM1 of RIM4, also termed regulator of IME2 protein 4, a putative RNA binding protein that is expressed at elevated levels early in meiosis. It functions as a meiotic activator required for both the IME1- and IME2-dependent pathways of meiotic gene …	-	-	-	-	GO:0000003, reproduction;GO:0000280, nuclear division;GO:0003674, molecular_function;GO:0003676, nucleic acid binding;GO:0003723, RNA binding;GO:0005488, binding;GO:0005575, cellular_component;GO:0005622, intracellular;GO:0005623, cell;GO:0005737, cytoplasm;GO:0006139, nucleobase-containing compound metabolic process;GO:0006259, DNA metabolic process;GO:0006260, DNA replication;GO:0006261, DNA-de…	-	-
TRINITY_DN14182_c0_g1	2.31364	24.1407	-3.38323	2.52708e-09	1.19857e-07	down	cd02654, nuc_hydro_CjNH, nuc_hydro_CjNH. Nucleoside hydrolases similar to Campylobacter jejuni nucleoside hydrolase. This group contains eukaryotic and bacterial proteins similar to C. jejuni nucleoside hydrolase. Nucleoside hydrolases cleave the N-glycosidic bond in nucleosides generating ribose and the respective base. These enzymes vary in their substrate specificity. C. jejuni nucleoside hydr…	pfam01156, IU_nuc_hydro, Inosine-uridine preferring nucleoside hydrolase. 2.24e-14	-	KOG2938, KOG2938, KOG2938, Predicted inosine-uridine preferring nucleoside hydrolase [Nucleotide transport and metabolism]. 1.09e-09	sp|Q9HGL1|YHLB_SCHPO Uncharacterized protein C800.11 OS=Schizosaccharomyces pombe (strain 972 / ATCC 24843) GN=SPBC800.11 PE=3 SV=1 3.14e-32	GO:0003674, molecular_function;GO:0003824, catalytic activity;GO:0005575, cellular_component;GO:0005622, intracellular;GO:0005623, cell;GO:0005737, cytoplasm;GO:0005829, cytosol;GO:0006139, nucleobase-containing compound metabolic process;GO:0006152, purine nucleoside catabolic process;GO:0006725, cellular aromatic compound metabolic process;GO:0006807, nitrogen compound metabolic process;GO:0008…	CAF0847424.1 unnamed protein product [Adineta steineri] 1.81e-85	-
TRINITY_DN8446_c0_g1	2.36375	24.6584	-3.38293	2.03926e-07	5.8119e-06	down	-	-	-	-	-	-	-	-
TRINITY_DN6607_c0_g1	2.46289	25.6801	-3.38223	3.29397e-05	0.000496675	down	-	-	-	-	-	-	-	-
TRINITY_DN6440_c0_g1	0.972023	10.1152	-3.37939	8.57955e-07	2.1053e-05	down	cd08249, enoyl_reductase_like, enoyl_reductase_like. Member identified as possible enoyl reductase of the MDR family. 2-enoyl thioester reductase (ETR) catalyzes the NADPH-dependent dependent conversion of trans-2-enoyl acyl carrier protein/coenzyme A (ACP/CoA) to acyl-(ACP/CoA) in fatty acid synthesis. 2-enoyl thioester reductase activity has been linked in Candida tropicalis as essential in mai…	-	-	KOG1198, KOG1198, KOG1198, Zinc-binding oxidoreductase [Energy production and conversion, General function prediction only]. 8.32e-06	sp|Q9P7F4|YKK1_SCHPO Zinc-type alcohol dehydrogenase-like protein C2E1P3.01 OS=Schizosaccharomyces pombe (strain 972 / ATCC 24843) GN=SPAC2E1P3.01 PE=3 SV=1 3.43e-09	-	KAJ3030869.1 hypothetical protein HDU68_007512 [Siphonaria sp. JEL0065] 3.46e-29	-
TRINITY_DN9306_c0_g1	0.319024	3.31986	-3.37939	0.00192287	0.013836	down	-	pfam03328, HpcH_HpaI, HpcH/HpaI aldolase/citrate lyase family. This family includes 2,4-dihydroxyhept-2-ene-1,7-dioic acid aldolase and 4-hydroxy-2-oxovalerate aldolase. 7.77e-12	-	-	sp|O86013|BPHF_NOVAR 4-hydroxy-2-oxovalerate aldolase OS=Novosphingobium aromaticivorans GN=bphF PE=3 SV=1 1.12e-19	-	MCL4142621.1 hypothetical protein [Idotea baltica] 6.48e-20	-
TRINITY_DN9844_c0_g1	4.13327	42.7976	-3.37217	1.75453e-08	6.73771e-07	down	cd16448, RING-H2, H2 subclass of RING (RING-H2) finger and its variants. RING finger is a specialized type of Zn-finger of 40 to 60 residues that binds two atoms of zinc. It is defined by the "cross-brace" motif that chelates zinc atoms by eight amino acid residues, typically Cys or His, arranged in a characteristic spacing. Canonical RING motifs have been categorized as two major subclasses, RIN…	pfam13639, zf-RING_2, Ring finger domain. 7.48e-07	-	KOG4628, KOG4628, KOG4628, Predicted E3 ubiquitin ligase [Posttranslational modification, protein turnover, chaperones]. 9.61e-08	sp|Q1MTR5|YG66_SCHPO Uncharacterized RING finger membrane protein C15C4.06c OS=Schizosaccharomyces pombe (strain 972 / ATCC 24843) GN=SPBC15C4.06c PE=3 SV=1 1.22e-08	GO:0003674, molecular_function;GO:0003824, catalytic activity;GO:0004842, ubiquitin-protein transferase activity;GO:0005488, binding;GO:0006464, cellular protein modification process;GO:0006807, nitrogen compound metabolic process;GO:0008150, biological_process;GO:0008152, metabolic process;GO:0008270, zinc ion binding;GO:0009987, cellular process;GO:0016567, protein ubiquitination;GO:0016740, tr…	XP_011408339.1 PREDICTED: E3 ubiquitin-protein ligase RNF13-like [Amphimedon queenslandica] 2.96e-06	-
TRINITY_DN7093_c0_g1	0.243979	2.523	-3.37031	0.00319063	0.020514	down	-	-	-	-	-	-	-	-
TRINITY_DN11218_c0_g1	0.304884	3.15011	-3.36907	0.00234741	0.0162075	down	cd05330, cyclohexanol_reductase_SDR_c, cyclohexanol reductases, including levodione reductase, classical (c) SDRs. Cyloclohexanol reductases,including (6R)-2,2,6-trimethyl-1,4-cyclohexanedione (levodione) reductase of Corynebacterium aquaticum, catalyze the reversible oxidoreduction of hydroxycyclohexanone derivatives. SDRs are a functionally diverse family of oxidoreductases that have a single d…	pfam13561, adh_short_C2, Enoyl-(Acyl carrier protein) reductase. 8.82e-22	-	KOG0725, KOG0725, KOG0725, Reductases with broad range of substrate specificities [General function prediction only]. 8.17e-22	sp|Q9LBG2|LVR_LEIAQ Levodione reductase OS=Leifsonia aquatica GN=lvr PE=1 SV=1 3.38e-26	-	MCL4136304.1 hypothetical protein [Idotea baltica] 5.31e-19	-
TRINITY_DN14138_c2_g4	1.25097	12.9149	-3.36792	0.000107602	0.00133959	down	-	-	-	-	-	-	-	-
TRINITY_DN19706_c0_g1	3.69689	38.137	-3.36681	0.000644892	0.00594432	down	-	-	-	-	-	-	-	-
TRINITY_DN2734_c0_g1	7.78183	79.7674	-3.35762	5.36909e-05	0.000749139	down	-	-	-	-	-	-	-	-
TRINITY_DN4061_c0_g1	11.5807	118.191	-3.35132	9.85019e-08	3.04637e-06	down	-	-	-	-	-	-	KAJ3029740.1 hypothetical protein HDU68_011257 [Siphonaria sp. JEL0065] 9.83e-34	-
TRINITY_DN8780_c0_g1	1.5689	16.0022	-3.35044	2.81198e-08	1.02416e-06	down	-	-	-	-	sp|Q00808|HETE1_PODAS Vegetative incompatibility protein HET-E-1 OS=Podospora anserina GN=HET-E1 PE=3 SV=1 3.64e-14	-	-	-
TRINITY_DN10779_c0_g1	2.0146	20.4775	-3.34547	1.29745e-08	5.13764e-07	down	cd11484, SLC-NCS1sbd_CobB-like, nucleobase-cation-symport-1 (NCS1) transporter CobB-like; solute-binding domain. This NCS1 subfamily includes Escherichia coli CodB (cytosine permease), and the Saccharomyces cerevisiae transporters: Fcy21p (Purine-cytosine permease), and vitamin B6 transporter Tpn1. NCS1s are essential components of salvage pathways for nucleobases and related metabolites; their k…	-	-	-	sp|P53099|TPN1_YEAST Vitamin B6 transporter TPN1 OS=Saccharomyces cerevisiae (strain ATCC 204508 / S288c) GN=TPN1 PE=1 SV=1 5.98e-56	-	CAF1120718.1 unnamed protein product [Didymodactylos carnosus] >CAF3884287.1 unnamed protein product [Didymodactylos carnosus] 3.08e-72	-
TRINITY_DN9709_c0_g1	0.989417	10.0551	-3.34521	5.74586e-05	0.000790429	down	-	-	-	-	-	-	-	-
TRINITY_DN1645_c0_g1	2.96476	30.0238	-3.34012	6.89711e-05	0.000923805	down	-	-	K12820-ko03040 Spliceosome	KOG0925, KOG0925, KOG0925, mRNA splicing factor ATP-dependent RNA helicase [RNA processing and modification]. 2.11e-11	sp|O42945|DHX15_SCHPO Probable pre-mRNA-splicing factor ATP-dependent RNA helicase prp43 OS=Schizosaccharomyces pombe (strain 972 / ATCC 24843) GN=prp43 PE=3 SV=1 5.84e-13	-	KIH66749.1 helicase protein [Ancylostoma duodenale] 1.58e-08	-
TRINITY_DN12928_c0_g2	23.5473	238.443	-3.34001	3.67718e-09	1.65161e-07	down	-	-	-	-	-	-	KAG4070263.1 hypothetical protein HA402_009826 [Bradysia odoriphaga] 1.50e-42	-
TRINITY_DN12355_c0_g1	0.372196	3.7628	-3.33767	0.000497779	0.00480815	down	-	-	-	-	-	-	-	-
TRINITY_DN9340_c0_g1	0.544477	5.49432	-3.335	0.000656075	0.00601836	down	-	-	-	-	-	-	-	-
TRINITY_DN4134_c0_g1	1.70986	17.235	-3.33339	1.66219e-06	3.75945e-05	down	cd19144, AKR_AKR13A1, AKR13A family of aldo-keto reductase (AKR). Schizosaccharomyces pombe aldo-keto reductase YakC is a founding member of aldo-keto reductase family 13 member A1 (AKR13A1). It catalyzes the reversible reduction of ketones to the respective alcohols using NADP(+) as a hydride donor. 9.28e-72	pfam00248, Aldo_ket_red, Aldo/keto reductase family. This family includes a number of K+ ion channel beta chain regulatory domains - these are reported to have oxidoreductase activity. 9.62e-34	-	KOG1575, KOG1575, KOG1575, Voltage-gated shaker-like K+ channel, subunit beta/KCNAB [Energy production and conversion]. 3.90e-48	sp|Q09923|YAKC_SCHPO Aldo-keto reductase yakc [NADP(+)] OS=Schizosaccharomyces pombe (strain 972 / ATCC 24843) GN=yakc PE=1 SV=1 6.76e-73	-	CAF1442439.1 unnamed protein product [Rotaria magnacalcarata] >CAF1566737.1 unnamed protein product [Rotaria magnacalcarata] >CAF2057445.1 unnamed protein product [Rotaria magnacalcarata] >CAF2111669.1 unnamed protein product [Rotaria magnacalcarata] >CAF3879119.1 unnamed protein product [Rotaria magnacalcarata] 4.44e-77	-
TRINITY_DN8891_c0_g1	0.253479	2.55416	-3.33291	0.00108705	0.00886874	down	-	-	-	-	-	-	-	-
TRINITY_DN9213_c0_g2	0.923567	9.28021	-3.32887	5.34819e-06	0.000103629	down	-	-	-	KOG2665, KOG2665, KOG2665, Predicted FAD-dependent oxidoreductase [Function unknown]. 2.41e-34	sp|P37339|LHGO_ECOLI L-2-hydroxyglutarate oxidase LhgO OS=Escherichia coli (strain K12) GN=lhgO PE=1 SV=3 3.04e-27	-	XP_040091681.1 L-2-hydroxyglutarate dehydrogenase, mitochondrial-like [Oryx dammah] 1.67e-61	-
TRINITY_DN13933_c1_g2	0.266132	2.65637	-3.31924	0.00188426	0.0136784	down	-	-	-	KOG2132, KOG2132, KOG2132, Uncharacterized conserved protein, contains JmjC domain [Chromatin structure and dynamics, Signal transduction mechanisms]. 4.90e-11	sp|Q00808|HETE1_PODAS Vegetative incompatibility protein HET-E-1 OS=Podospora anserina GN=HET-E1 PE=3 SV=1 4.44e-50	-	OUC39983.1 putative JmjC domain protein [Trichinella nativa] 4.68e-13	-
TRINITY_DN10495_c0_g1	9.12476	90.084	-3.30341	2.02055e-06	4.42052e-05	down	-	-	-	-	-	-	-	-
TRINITY_DN478_c0_g1	7.58965	74.884	-3.30255	3.78615e-08	1.32578e-06	down	cd03148, GATase1_EcHsp31_like, Type 1 glutamine amidotransferase (GATase1)-like domain found in Escherichia coli Hsp31 protein (EcHsp31). Type 1 glutamine amidotransferase (GATase1)-like domain found in Escherichia coli Hsp31 protein (EcHsp31). This group includes proteins similar to EcHsp31. EcHsp31 has chaperone activity. EcHsp31 coordinates a metal ion using a 2-His-1-carboxylate motif present…	-	-	-	sp|Q9I4K0|HCHA_PSEAE Protein deglycase HchA OS=Pseudomonas aeruginosa (strain ATCC 15692 / PAO1 / 1C / PRS 101 / LMG 12228) GN=hchA PE=3 SV=1 5.93e-119	-	KMQ82412.1 chaperone protein [Lasius niger] 1.21e-130	-
TRINITY_DN25925_c0_g1	0.224901	2.21406	-3.29933	0.00150788	0.0115749	down	-	-	-	-	sp|P27643|SP5K_BACSU Stage V sporulation protein K OS=Bacillus subtilis (strain 168) GN=spoVK PE=2 SV=3 5.22e-12	-	CAH0387796.1 unnamed protein product [Bemisia tabaci] 5.89e-143	-
TRINITY_DN13465_c0_g1	84.8721	828.221	-3.28665	1.22029e-06	2.86713e-05	down	cd03013, PRX5_like, Peroxiredoxin (PRX) family, PRX5-like subfamily; members are similar to the human protein, PRX5, a homodimeric TRX peroxidase, widely expressed in tissues and found cellularly in mitochondria, peroxisomes and the cytosol. The cellular location of PRX5 suggests that it may have an important antioxidant role in organelles that are major sources of reactive oxygen species (ROS), …	pfam08534, Redoxin, Redoxin. This family of redoxins includes peroxiredoxin, thioredoxin and glutaredoxin proteins. 4.95e-14	K14171-ko04122 Sulfur relay system	KOG0541, KOG0541, KOG0541, Alkyl hydroperoxide reductase/peroxiredoxin [Posttranslational modification, protein turnover, chaperones]. 3.64e-36	sp|Q5ASN8|PMP20_EMENI Putative peroxiredoxin pmp20 OS=Emericella nidulans (strain FGSC A4 / ATCC 38163 / CBS 112.46 / NRRL 194 / M139) GN=AN8692 PE=1 SV=1 8.24e-58	-	KRT81632.1 hypothetical protein AMK59_5447 [Oryctes borbonicus] 1.68e-27	-
TRINITY_DN4275_c0_g1	0.398489	3.88853	-3.28661	0.00050306	0.00484057	down	-	-	-	-	-	-	-	-
TRINITY_DN14062_c0_g1	16.4961	160.619	-3.28345	2.48303e-11	1.82438e-09	down	cd17502, MFS_Azr1_MDR_like, Saccharomyces cerevisiae Azole resistance protein 1 (Azr1p), and similar multidrug resistance (MDR) transporters of the Major Facilitator Superfamily. This subfamily is composed of multidrug resistance (MDR) transporters including various Saccharomyces cerevisiae proteins such as azole resistance protein 1 (Azr1p), vacuolar basic amino acid transporter 1 (Vba1p), vacuo…	-	-	-	sp|B6HJU0|ROQT_PENRW Efflux pump roqT OS=Penicillium rubens (strain ATCC 28089 / DSM 1075 / NRRL 1951 / Wisconsin 54-1255) GN=roqT PE=1 SV=1 3.92e-109	-	KAJ3010587.1 hypothetical protein HDU68_002075 [Siphonaria sp. JEL0065] 2.59e-58	-
TRINITY_DN6481_c0_g1	0.249825	2.43211	-3.28322	0.00665265	0.0359074	down	cd02198, YjgH_like, YjgH belongs to a large family of YjgF/YER057c/UK114-like proteins present in bacteria, archaea, and eukaryotes with no definitive function. The conserved domain is similar in structure to chorismate mutase but there is no sequence similarity and no functional connection. Members of this family have been implicated in isoleucine (Yeo7, Ibm1, aldR) and purine (YjgF) biosynthesi…	pfam01593, Amino_oxidase, Flavin containing amine oxidoreductase. This family consists of various amine oxidases, including maze polyamine oxidase (PAO) and various flavin containing monoamine oxidases (MAO). The aligned region includes the flavin binding site of these enzymes. The family also contains phytoene dehydrogenases and related enzymes. In vertebrates MAO plays an important role regulat…	K00274-ko00340 Histidine metabolism;ko04726 Serotonergic synapse;ko00350 Tyrosine metabolism;ko00260 Glycine, serine and threonine metabolism;ko00982 Drug metabolism - cytochrome P450;ko00330 Arginine and proline metabolism;ko00950 Isoquinoline alkaloid biosynthesis;ko00360 Phenylalanine metabolism;ko00380 Tryptophan metabolism;ko04728 Dopaminergic synapse	KOG0029, KOG0029, KOG0029, Amine oxidase [Secondary metabolites biosynthesis, transport and catabolism]. 1.28e-19	sp|Q54IT3|AOFA_DICDI Probable flavin-containing monoamine oxidase A OS=Dictyostelium discoideum GN=maoA PE=3 SV=1 1.63e-49	-	XP_030624997.1 probable flavin-containing monoamine oxidase A [Chanos chanos] 3.15e-64	-
TRINITY_DN13307_c0_g3	7.39762	71.8771	-3.2804	2.50088e-10	1.49946e-08	down	-	pfam10230, LIDHydrolase, Lipid-droplet associated hydrolase. This family of proteins is conserved from plants to humans. The function is as a lipid-droplet hydrolase in the yeast members. 6.82e-25	-	KOG3975, KOG3975, KOG3975, Uncharacterized conserved protein [Function unknown]. 1.36e-15	sp|Q5HZX7|LDAH_RAT Lipid droplet-associated hydrolase OS=Rattus norvegicus GN=Ldah PE=2 SV=1 1.45e-11	-	XP_026690937.1 lipid droplet-associated hydrolase [Ciona intestinalis] 9.53e-17	-
TRINITY_DN21198_c0_g1	1.0554	10.2143	-3.27472	0.000121312	0.00147984	down	-	-	-	-	sp|Q936X2|ATZF_PSESD Allophanate hydrolase OS=Pseudomonas sp. (strain ADP) GN=atzF PE=1 SV=1 1.02e-35	-	XP_044742466.1 urea amidolyase-like [Chrysoperla carnea] 3.13e-35	-
TRINITY_DN12170_c0_g1	2.38237	23.046	-3.27404	2.08479e-07	5.91511e-06	down	cd00883, beta_CA_cladeA, Carbonic anhydrases (CA) are zinc-containing enzymes that catalyze the reversible hydration of carbon dioxide in a two-step mechanism in which the nucleophilic attack of a zinc-bound hydroxide ion on carbon dioxide is followed by the regeneration of an active site by ionization of the zinc-bound water molecule and removal of a proton from the active site. CAs are ubiquito…	pfam00484, Pro_CA, Carbonic anhydrase. This family includes carbonic anhydrases as well as a family of non-functional homologs related to YbcF. 2.35e-24	K01673-ko00910 Nitrogen metabolism	KOG1578, KOG1578, KOG1578, Predicted carbonic anhydrase involved in protection against oxidative damage [Inorganic ion transport and metabolism]. 1.07e-12	sp|O94255|CAN_SCHPO Carbonic anhydrase OS=Schizosaccharomyces pombe (strain 972 / ATCC 24843) GN=SPBP8B7.05c PE=1 SV=2 5.22e-39	GO:0003674, molecular_function;GO:0003824, catalytic activity;GO:0004089, carbonate dehydratase activity;GO:0005575, cellular_component;GO:0005622, intracellular;GO:0005623, cell;GO:0005634, nucleus;GO:0005737, cytoplasm;GO:0005739, mitochondrion;GO:0005740, mitochondrial envelope;GO:0005758, mitochondrial intermembrane space;GO:0006950, response to stress;GO:0006979, response to oxidative stress…	MCL4151541.1 hypothetical protein [Idotea baltica] 4.19e-45	-
TRINITY_DN12047_c0_g1	3.44726	33.0303	-3.26027	0.000128406	0.00155149	down	-	pfam12051, DUF3533, Protein of unknown function (DUF3533). This family of transmembrane proteins is functionally uncharacterized. This protein is found in bacteria and eukaryotes. Proteins in this family are typically between 393 to 772 amino acids in length. 1.22e-52	-	-	sp|P46950|SNG1_YEAST Nitrosoguanidine resistance protein SNG1 OS=Saccharomyces cerevisiae (strain ATCC 204508 / S288c) GN=SNG1 PE=1 SV=1 3.41e-23	GO:0000322, storage vacuole;GO:0000323, lytic vacuole;GO:0000324, fungal-type vacuole;GO:0005575, cellular_component;GO:0005622, intracellular;GO:0005623, cell;GO:0005737, cytoplasm;GO:0005773, vacuole;GO:0005783, endoplasmic reticulum;GO:0005886, plasma membrane;GO:0006810, transport;GO:0008150, biological_process;GO:0009987, cellular process;GO:0012505, endomembrane system;GO:0015931, nucleobas…	CAF1622071.1 unnamed protein product [Adineta ricciae] 5.88e-09	-
TRINITY_DN8537_c0_g1	0.766829	7.31581	-3.25404	3.32077e-05	0.000500122	down	-	-	-	-	-	-	-	-
TRINITY_DN12347_c0_g1	0.989475	9.34572	-3.23957	3.9995e-05	0.000582332	down	cd02878, GH18_zymocin_alpha, Zymocin, alpha subunit. Zymocin is a heterotrimeric enzyme that inhibits yeast cell cycle progression. The zymocin alpha subunit has a chitinase activity that is essential for holoenzyme action from the cell exterior while the gamma subunit contains the intracellular toxin responsible for G1 phase cell cycle arrest. The zymocin alpha and beta subunits are thought to a…	pfam00704, Glyco_hydro_18, Glycosyl hydrolases family 18. 5.81e-39	K01183-ko00520 Amino sugar and nucleotide sugar metabolism	KOG2806, KOG2806, KOG2806, Chitinase [Carbohydrate transport and metabolism]. 9.82e-29	sp|P09805|KTXA_KLULA Killer toxin subunits alpha/beta OS=Kluyveromyces lactis (strain ATCC 8585 / CBS 2359 / DSM 70799 / NBRC 1267 / NRRL Y-1140 / WM37) PE=1 SV=1 6.89e-43	-	UJR08796.1 hypothetical protein I4U23_013052 [Adineta vaga] 2.75e-102	-
TRINITY_DN13759_c0_g5	9.51928	89.9074	-3.23952	1.0319e-10	6.69208e-09	down	-	pfam04388, Hamartin, Hamartin protein. This family includes the hamartin protein which is thought to function as a tumor suppressor. The hamartin protein interacts with the tuberin protein pfam03542. Tuberous sclerosis complex (TSC) is an autosomal dominant disorder and is characterized by the presence of hamartomas in many organs, such as brain, skin, heart, lung, and kidney. It is caused by mut…	-	-	sp|Q09778|TSC1_SCHPO Tuberous sclerosis 1 protein homolog OS=Schizosaccharomyces pombe (strain 972 / ATCC 24843) GN=tsc1 PE=1 SV=1 6.17e-19	GO:0005575, cellular_component;GO:0005622, intracellular;GO:0005623, cell;GO:0005737, cytoplasm;GO:0005829, cytosol;GO:0007346, regulation of mitotic cell cycle;GO:0008150, biological_process;GO:0009966, regulation of signal transduction;GO:0009968, negative regulation of signal transduction;GO:0010564, regulation of cell cycle process;GO:0010646, regulation of cell communication;GO:0010648, nega…	XP_039252160.1 hamartin-like [Styela clava] 2.11e-08	-
TRINITY_DN8623_c0_g1	6.85148	64.6211	-3.23752	1.12835e-06	2.68084e-05	down	cd02537, GT8_Glycogenin, Glycogenin belongs the GT 8 family and initiates the biosynthesis of glycogen. Glycogenin initiates the biosynthesis of glycogen by incorporating glucose residues through a self-glucosylation reaction at a Tyr residue, and then acts as substrate for chain elongation by glycogen synthase and branching enzyme. It contains a conserved DxD motif and an N-terminal beta-alpha-b…	-	-	-	sp|Q947G8|GOLS1_SOLLC Galactinol synthase 1 OS=Solanum lycopersicum GN=GOLS1 PE=2 SV=1 1.27e-25	-	CAF4461181.1 unnamed protein product [Didymodactylos carnosus] 1.74e-40	-
TRINITY_DN14104_c0_g3	0.737648	6.89242	-3.22401	0.00501953	0.0290998	down	cd11319, AmyAc_euk_AmyA, Alpha amylase catalytic domain found in eukaryotic Alpha-amylases (also called 1,4-alpha-D-glucan-4-glucanohydrolase). AmyA (EC 3.2.1.1) catalyzes the hydrolysis of alpha-(1,4) glycosidic linkages of glycogen, starch, related polysaccharides, and some oligosaccharides. This group includes eukaryotic alpha-amylases including proteins from fungi, sponges, and protozoans. Th…	pfam09260, DUF1966, Domain of unknown function (DUF1966). This domain is found in various fungal alpha-amylase proteins. Its exact function has not, as yet, been defined. 2.18e-32	K01176-ko00500 Starch and sucrose metabolism;ko04973 Carbohydrate digestion and absorption	KOG0471, KOG0471, KOG0471, Alpha-amylase [Carbohydrate transport and metabolism]. 1.94e-17	sp|P0C1B3|AMYA1_ASPOR Alpha-amylase A type-1/2 OS=Aspergillus oryzae (strain ATCC 42149 / RIB 40) GN=amy1 PE=1 SV=1 0.0	-	CAF0931954.1 unnamed protein product [Didymodactylos carnosus] >CAF3709786.1 unnamed protein product [Didymodactylos carnosus] 2.62e-70	-
TRINITY_DN12678_c0_g1	10.8916	101.186	-3.21573	2.5285e-05	0.000397278	down	-	-	-	-	sp|Q00808|HETE1_PODAS Vegetative incompatibility protein HET-E-1 OS=Podospora anserina GN=HET-E1 PE=3 SV=1 2.70e-83	-	CAF1012293.1 unnamed protein product [Rotaria sp. Silwood1] >CAF1320666.1 unnamed protein product [Rotaria sp. Silwood1] >CAF3520371.1 unnamed protein product [Rotaria sp. Silwood1] >CAF4506557.1 unnamed protein product [Rotaria sp. Silwood1] 3.51e-06	-
TRINITY_DN10096_c0_g1	0.344686	3.19293	-3.21153	9.59404e-05	0.00121828	down	-	pfam18951, DUF5695, Family of unknown function (DUF5695). This is a family of unknown function mainly found in fungi and bacteria. 0.0	-	-	-	-	UJR06967.1 hypothetical protein I4U23_011255 [Adineta vaga] 3.55e-95	-
TRINITY_DN14236_c0_g3	52.6132	487.367	-3.21151	2.67225e-05	0.000416262	down	cd05312, NAD_bind_1_malic_enz, NAD(P) binding domain of malic enzyme (ME), subgroup 1. Malic enzyme (ME), a member of the amino acid dehydrogenase (DH)-like domain family, catalyzes the oxidative decarboxylation of L-malate to pyruvate in the presence of cations (typically Mg++ or Mn++) with the concomitant reduction of cofactor NAD+ or NADP+. ME has been found in all organisms, and plays importa…	pfam03949, Malic_M, Malic enzyme, NAD binding domain. 2.89e-64	K00029-ko00710 Carbon fixation in photosynthetic organisms;ko01200 Carbon metabolism;ko00620 Pyruvate metabolism	KOG1257, KOG1257, KOG1257, NADP+-dependent malic enzyme [Energy production and conversion]. 2.25e-149	sp|Q6TU48|MAOX_DICDI NADP-dependent malic enzyme OS=Dictyostelium discoideum GN=malA PE=2 SV=1 3.19e-141	-	KAJ3030227.1 hypothetical protein HDU68_009751 [Siphonaria sp. JEL0065] 4.79e-157	-
TRINITY_DN8033_c0_g1	11.2047	103.79	-3.21149	0.000234209	0.00257083	down	-	-	-	-	-	-	-	-
TRINITY_DN9745_c0_g1	0.40501	3.73201	-3.20392	0.000471129	0.00459242	down	cd16142, ARS_like, uncharacterized arylsulfatase subfamily. Sulfatases catalyze the hydrolysis of sulfate esters from wide range of substrates, including steroids, carbohydrates and proteins. Sulfate esters may be formed from various alcohols and amines. The biological roles of sulfatase includes the cycling of sulfur in the environment, in the degradation of sulfated glycosaminoglycans and glyco…	pfam00884, Sulfatase, Sulfatase. 1.94e-25	-	KOG3867, KOG3867, KOG3867, Sulfatase [General function prediction only]. 6.14e-51	sp|Q8WNQ7|GALNS_PIG N-acetylgalactosamine-6-sulfatase OS=Sus scrofa GN=GALNS PE=2 SV=1 1.12e-47	-	MCL4139502.1 hypothetical protein [Idotea baltica] 5.61e-124	-
TRINITY_DN12112_c0_g1	6.94611	63.9349	-3.20233	7.18661e-10	3.88719e-08	down	-	pfam03171, 2OG-FeII_Oxy, 2OG-Fe(II) oxygenase superfamily. This family contains members of the 2-oxoglutarate (2OG) and Fe(II)-dependent oxygenase superfamily. This family includes the C-terminal of prolyl 4-hydroxylase alpha subunit. The holoenzyme has the activity EC:1.14.11.2 catalyzing the reaction: Procollagen L-proline + 2-oxoglutarate + O2 <=> procollagen trans- 4-hydroxy-L-proline + succi…	-	KOG0143, KOG0143, KOG0143, Iron/ascorbate family oxidoreductases [Secondary metabolites biosynthesis, transport and catabolism, General function prediction only]. 4.43e-44	sp|Q54RA4|Y3291_DICDI Probable iron/ascorbate oxidoreductase DDB_G0283291 OS=Dictyostelium discoideum GN=DDB_G0283291 PE=3 SV=1 2.14e-31	-	CAF1035011.1 unnamed protein product [Didymodactylos carnosus] >CAF1070456.1 unnamed protein product [Didymodactylos carnosus] >CAF3803344.1 unnamed protein product [Didymodactylos carnosus] >CAF3837599.1 unnamed protein product [Didymodactylos carnosus] 9.23e-47	-
TRINITY_DN12273_c0_g1	0.921074	8.47455	-3.20175	4.92448e-05	0.00069705	down	-	-	-	-	sp|A1DPF0|PLYC_NEOFI Probable pectate lyase C OS=Neosartorya fischeri (strain ATCC 1020 / DSM 3700 / FGSC A1164 / NRRL 181) GN=plyC PE=3 SV=1 8.11e-170	-	-	-
TRINITY_DN27217_c0_g1	0.926679	8.49917	-3.19718	0.00810966	0.0417009	down	-	-	-	-	-	-	-	-
TRINITY_DN6469_c0_g1	0.422627	3.87025	-3.19497	0.004054	0.0246557	down	-	-	-	-	-	-	-	-
TRINITY_DN16199_c0_g1	1.0612	9.69818	-3.19202	3.00624e-05	0.00046039	down	-	-	-	-	-	-	-	-
TRINITY_DN10902_c0_g1	0.244032	2.22808	-3.19065	0.00484417	0.028297	down	-	pfam13520, AA_permease_2, Amino acid permease. 2.25e-11	-	KOG1287, KOG1287, KOG1287, Amino acid transporters [Amino acid transport and metabolism]. 1.09e-08	sp|P50276|MUP1_YEAST High-affinity methionine permease OS=Saccharomyces cerevisiae (strain ATCC 204508 / S288c) GN=MUP1 PE=1 SV=1 6.99e-66	-	XP_039299719.1 LOW QUALITY PROTEIN: high-affinity methionine permease-like [Nilaparvata lugens] 6.15e-39	-
TRINITY_DN9155_c0_g1	0.333755	3.00178	-3.16896	0.00350812	0.0220642	down	-	-	-	-	-	-	-	-
TRINITY_DN14223_c0_g1	1.14505	10.2925	-3.16811	7.27127e-08	2.31642e-06	down	cd05398, NT_ClassII-CCAase, Nucleotidyltransferase (NT) domain of ClassII CCA-adding enzymes. CCA-adding enzymes add the sequence [cytidine(C)-cytidine-adenosine (A)], one nucleotide at a time, onto the 3' end of tRNA, in a template-independent reaction. This Class II group is comprised mainly of eubacterial and eukaryotic enzymes and includes Bacillus stearothermophilus CCAase, Escherichia coli …	pfam01743, PolyA_pol, Poly A polymerase head domain. This family includes nucleic acid independent RNA polymerases, such as Poly(A) polymerase, which adds the poly (A) tail to mRNA EC:2.7.7.19. This family also includes the tRNA nucleotidyltransferase that adds the CCA to the 3' of the tRNA EC:2.7.7.25. This family is part of the nucleotidyltransferase superfamily. 1.79e-17	-	KOG2159, KOG2159, KOG2159, tRNA nucleotidyltransferase/poly(A) polymerase [Translation, ribosomal structure and biogenesis]. 9.60e-47	sp|P21269|CCA1_YEAST CCA tRNA nucleotidyltransferase, mitochondrial OS=Saccharomyces cerevisiae (strain ATCC 204508 / S288c) GN=CCA1 PE=1 SV=1 4.62e-74	-	KAJ3012882.1 CCA tRNA nucleotidyltransferase, mitochondrial [Siphonaria sp. JEL0065] 5.07e-62	-
TRINITY_DN10778_c0_g1	5.8697	52.4259	-3.15892	9.16126e-05	0.00117388	down	-	-	-	-	sp|D4AY86|LYSM6_ARTBC LysM domain-containing protein ARB_01155/01156 OS=Arthroderma benhamiae (strain ATCC MYA-4681 / CBS 112371) GN=ARB_01155/01156 PE=3 SV=2 7.85e-55	-	-	-
TRINITY_DN7033_c0_g1	0.729896	6.49898	-3.15445	0.00292608	0.0192313	down	-	-	-	-	-	-	-	-
TRINITY_DN14617_c0_g1	1.22454	10.8861	-3.15218	2.37862e-05	0.000375586	down	cd08249, enoyl_reductase_like, enoyl_reductase_like. Member identified as possible enoyl reductase of the MDR family. 2-enoyl thioester reductase (ETR) catalyzes the NADPH-dependent dependent conversion of trans-2-enoyl acyl carrier protein/coenzyme A (ACP/CoA) to acyl-(ACP/CoA) in fatty acid synthesis. 2-enoyl thioester reductase activity has been linked in Candida tropicalis as essential in mai…	-	-	KOG1198, KOG1198, KOG1198, Zinc-binding oxidoreductase [Energy production and conversion, General function prediction only]. 7.89e-13	sp|Q9SV68|QORH_ARATH Putative quinone-oxidoreductase homolog, chloroplastic OS=Arabidopsis thaliana GN=At4g13010 PE=2 SV=1 4.40e-22	-	MCL4152370.1 hypothetical protein [Idotea baltica] 1.90e-22	-
TRINITY_DN10291_c0_g1	5.09157	45.2422	-3.15149	1.49269e-08	5.83038e-07	down	-	pfam14269, Arylsulfotran_2, Arylsulfotransferase (ASST). 2.23e-82	-	-	-	-	-	-
TRINITY_DN13271_c0_g1	30.3579	269.543	-3.15037	0.000498814	0.00481064	down	cd11065, CYP64-like, cytochrome P450 family 64-like fungal cytochrome P450s. This group includes Aspergillus flavus cytochrome P450 64 (CYP64), also called O-methylsterigmatocystin (OMST) oxidoreductase or aflatoxin B synthase or aflatoxin biosynthesis protein Q, and similar fungal cytochrome P450s. CYP64 converts OMST to aflatoxin B1 and converts dihydro-O-methylsterigmatocystin (DHOMST) to afla…	pfam00067, p450, Cytochrome P450. Cytochrome P450s are haem-thiolate proteins involved in the oxidative degradation of various compounds. They are particularly well known for their role in the degradation of environmental toxins and mutagens. They can be divided into 4 classes, according to the method by which electrons from NAD(P)H are delivered to the catalytic site. Sequence conservation is re…	-	KOG0156, KOG0156, KOG0156, Cytochrome P450 CYP2 subfamily [Secondary metabolites biosynthesis, transport and catabolism]. 3.42e-12	sp|G3Y416|YANC_ASPNA Cytochrome P450 monooxygenase yanC OS=Aspergillus niger (strain ATCC 1015 / CBS 113.46 / FGSC A1144 / LSHB Ac4 / NCTC 3858a / NRRL 328 / USDA 3528.7) GN=yanC PE=1 SV=1 1.99e-24	-	KAG8579998.1 hypothetical protein GDO81_007072 [Engystomops pustulosus] >KAG8579999.1 hypothetical protein GDO81_007072 [Engystomops pustulosus] 1.85e-18	-
TRINITY_DN7083_c0_g1	54.3645	480.24	-3.14302	9.41578e-05	0.00120044	down	-	-	-	-	-	-	-	-
TRINITY_DN11284_c0_g2	0.363024	3.20347	-3.1415	0.00699774	0.0374047	down	-	pfam03151, TPT, Triose-phosphate Transporter family. This family includes transporters with a specificity for triose phosphate. 4.80e-09	-	KOG1441, KOG1441, KOG1441, Glucose-6-phosphate/phosphate and phosphoenolpyruvate/phosphate antiporter [Carbohydrate transport and metabolism, Amino acid transport and metabolism]. 6.93e-30	sp|Q9SUV2|PT432_ARATH Probable sugar phosphate/phosphate translocator At4g32390 OS=Arabidopsis thaliana GN=At4g32390 PE=3 SV=1 1.96e-41	-	KAJ3010561.1 hypothetical protein HDU68_002082 [Siphonaria sp. JEL0065] 2.45e-50	-
TRINITY_DN10032_c0_g1	3.96491	34.8831	-3.13717	1.33413e-06	3.08892e-05	down	cd01042, DMQH, Demethoxyubiquinone hydroxylase, ferritin-like diiron-binding domain. Demethoxyubiquinone hydroxylases (DMQH) are members of the ferritin-like, diiron-carboxylate family which are present in eukaryotes (the CLK-1/CAT5 family) and prokaryotes (the Coq7 family). DMQH participates in one of the last steps of ubiquinone biosysnthesis and is responsible for DMQ hydroxylation, resulting …	pfam03232, COQ7, Ubiquinone biosynthesis protein COQ7. Members of this family contain two repeats of about 90 amino acids, that contains two conserved motifs. One of these DXEXXH may be part of an enzyme active site. 3.56e-55	K06134-ko00130 Ubiquinone and other terpenoid-quinone biosynthesis	KOG4061, KOG4061, KOG4061, DMQ mono-oxygenase/Ubiquinone biosynthesis protein COQ7/CLK-1/CAT5 [General function prediction only]. 3.60e-49	sp|P41735|COQ7_YEAST 5-demethoxyubiquinone hydroxylase, mitochondrial OS=Saccharomyces cerevisiae (strain ATCC 204508 / S288c) GN=CAT5 PE=1 SV=2 2.31e-47	GO:0003674, molecular_function;GO:0003824, catalytic activity;GO:0004497, monooxygenase activity;GO:0005575, cellular_component;GO:0005622, intracellular;GO:0005623, cell;GO:0005737, cytoplasm;GO:0005739, mitochondrion;GO:0005740, mitochondrial envelope;GO:0005743, mitochondrial inner membrane;GO:0006732, coenzyme metabolic process;GO:0006733, oxidoreduction coenzyme metabolic process;GO:0006743,…	ELU14971.1 hypothetical protein CAPTEDRAFT_148541 [Capitella teleta] 1.07e-49	-
TRINITY_DN11173_c0_g1	15.456	135.774	-3.13497	3.04446e-08	1.09317e-06	down	cd11482, SLC-NCS1sbd_NRT1-like, nucleobase-cation-symport-1 (NCS1) transporter NRT1-like; solute-binding domain. This fungal NCS1 subfamily includes various Saccharomyces cerevisiae transporters: nicotinamide riboside transporter 1 (Nrt1p, also called Thi71p), Dal4p (allantoin permease), Fui1p (uridine permease), Fur4p (uracil permease), and Thi7p (thiamine transporter). NCS1s are essential compo…	pfam02133, Transp_cyt_pur, Permease for cytosine/purines, uracil, thiamine, allantoin. 1.77e-102	-	KOG2466, KOG2466, KOG2466, Uridine permease/thiamine transporter/allantoin transport [Nucleotide transport and metabolism, Coenzyme transport and metabolism]. 1.22e-158	sp|O14035|YEME_SCHPO Uncharacterized permease C29B12.14c OS=Schizosaccharomyces pombe (strain 972 / ATCC 24843) GN=SPAC29B12.14c PE=3 SV=2 1.49e-171	GO:0000139, Golgi membrane;GO:0000322, storage vacuole;GO:0000323, lytic vacuole;GO:0000324, fungal-type vacuole;GO:0003674, molecular_function;GO:0005215, transporter activity;GO:0005350, pyrimidine nucleobase transmembrane transporter activity;GO:0005575, cellular_component;GO:0005622, intracellular;GO:0005623, cell;GO:0005737, cytoplasm;GO:0005773, vacuole;GO:0005783, endoplasmic reticulum;GO:…	CAF3115429.1 unnamed protein product [Rotaria sp. Silwood2] 7.69e-218	-
TRINITY_DN7346_c0_g1	0.76457	6.6994	-3.13131	0.000842766	0.00728735	down	cd20071, SET_SMYD, SET domain (including SET domain and post-SET domain) found in SET and MYND domain-containing protein, and similar proteins. The family includes SET and MYND domain-containing proteins, SMYD1-SYMD5. SMYD1 (EC 2.1.1.43; also termed BOP) is a heart and muscle specific SET-MYND domain containing protein, which functions as a histone methyltransferase and regulates downstream gene …	-	-	KOG2084, KOG2084, KOG2084, Predicted histone tail methylase containing SET domain [Chromatin structure and dynamics]. 8.51e-08	sp|Q54DL6|Y2140_DICDI SET and MYND domain-containing protein DDB_G0292140 OS=Dictyostelium discoideum GN=DDB_G0292140 PE=3 SV=1 2.44e-12	-	XP_041482187.1 histone-lysine N-methyltransferase ASHR1-like isoform X2 [Lytechinus variegatus] 4.04e-14	-
TRINITY_DN14062_c3_g6	2.84387	24.9012	-3.13029	5.49726e-06	0.000106068	down	-	-	-	-	-	-	CAF3382508.1 unnamed protein product [Rotaria sp. Silwood2] >CAF4344243.1 unnamed protein product [Rotaria sp. Silwood2] 3.95e-52	-
TRINITY_DN14253_c3_g1	0.639065	5.595	-3.1301	0.000982926	0.00815001	down	-	pfam12505, DUF3712, Protein of unknown function (DUF3712). This domain family is found in eukaryotes, and is approximately 130 amino acids in length. 2.01e-15	-	-	-	-	-	-
TRINITY_DN13894_c2_g1	45.7544	399.811	-3.12734	1.94906e-05	0.000318438	down	cd02188, gamma_tubulin, The gamma-tubulin family. Gamma-tubulin is a ubiquitous phylogenetically conserved member of tubulin superfamily. Gamma is a low abundance protein present within the cells in both various types of microtubule-organizing centers and cytoplasmic protein complexes. Gamma-tubulin recruits the alpha/beta-tubulin dimers that form the minus ends of microtubules and is thought to …	pfam03953, Tubulin_C, Tubulin C-terminal domain. This family includes the tubulin alpha, beta and gamma chains. Members of this family are involved in polymer formation. Tubulins are GTPases. FtsZ can polymerize into tubes, sheets, and rings in vitro and is ubiquitous in eubacteria and archaea. Tubulin is the major component of microtubules. (The FtsZ GTPases have been split into their won family…	-	KOG1374, KOG1374, KOG1374, Gamma tubulin [Cytoskeleton]. 0.0	sp|P53377|TBG_NEUCR Tubulin gamma chain OS=Neurospora crassa (strain ATCC 24698 / 74-OR23-1A / CBS 708.71 / DSM 1257 / FGSC 987) GN=tbg PE=2 SV=1 0.0	GO:0000022, mitotic spindle elongation;GO:0000070, mitotic sister chromatid segregation;GO:0000075, cell cycle checkpoint;GO:0000226, microtubule cytoskeleton organization;GO:0000278, mitotic cell cycle;GO:0000280, nuclear division;GO:0000281, mitotic cytokinesis;GO:0000819, sister chromatid segregation;GO:0000910, cytokinesis;GO:0000923, equatorial microtubule organizing center;GO:0000928, gamma…	KAJ3031595.1 gamma-tubulin [Siphonaria sp. JEL0065] 8.63e-218	-
TRINITY_DN11933_c0_g1	3.64339	31.8085	-3.12606	1.30401e-07	3.8818e-06	down	cd08771, DLP_1, Dynamin_like protein family includes dynamins and Mx proteins. The dynamin family of large mechanochemical GTPases includes the classical dynamins and dynamin-like proteins (DLPs) that are found throughout the Eukarya. These proteins catalyze membrane fission during clathrin-mediated endocytosis. Dynamin consists of five domains; an N-terminal G domain that binds and hydrolyzes GT…	pfam00350, Dynamin_N, Dynamin family. 2.26e-11	-	KOG0446, KOG0446, KOG0446, Vacuolar sorting protein VPS1, dynamin, and related proteins [Intracellular trafficking, secretion, and vesicular transport, General function prediction only]. 8.56e-20	sp|Q6TN15|MX_SINCH Interferon-induced GTP-binding protein Mx OS=Siniperca chuatsi GN=mx PE=2 SV=1 3.98e-38	-	KAG8591055.1 hypothetical protein GDO81_007037 [Engystomops pustulosus] 1.49e-38	-
TRINITY_DN12207_c0_g1	1.60981	14.0375	-3.12432	7.29326e-07	1.82489e-05	down	-	pfam01425, Amidase, Amidase. 1.76e-26	K01426-ko00627 Aminobenzoate degradation;ko00643 Styrene degradation;ko00360 Phenylalanine metabolism;ko00380 Tryptophan metabolism;ko00330 Arginine and proline metabolism	KOG1211, KOG1211, KOG1211, Amidases [Translation, ribosomal structure and biogenesis]. 1.77e-25	sp|Q9URY4|YI01_SCHPO Putative amidase C869.01 OS=Schizosaccharomyces pombe (strain 972 / ATCC 24843) GN=SPAC869.01 PE=3 SV=1 2.67e-85	-	XP_034140866.1 putative amidase C869.01 [Drosophila guanche] >BAF95823.1 amidase homolog [Saccharomyces pastorianus] 6.16e-91	-
TRINITY_DN14176_c0_g2	3.588	31.1653	-3.11869	1.83743e-06	4.09747e-05	down	-	-	-	-	-	-	-	-
TRINITY_DN14320_c11_g1	0.824123	7.15581	-3.11818	0.000940952	0.00788428	down	-	-	-	-	-	-	-	-
TRINITY_DN18382_c0_g1	4.40318	38.2147	-3.11751	7.46462e-07	1.8641e-05	down	cd00770, SerRS_core, Seryl-tRNA synthetase (SerRS) class II core catalytic domain. SerRS is responsible for the attachment of serine to the 3' OH group of ribose of the appropriate tRNA. This domain It is primarily responsible for ATP-dependent formation of the enzyme bound aminoacyl-adenylate. Class II assignment is based upon its structure and the presence of three characteristic sequence motif…	pfam00587, tRNA-synt_2b, tRNA synthetase class II core domain (G, H, P, S and T). tRNA-synt_2b is a family of largely threonyl-tRNA members. 4.63e-09	K01875-ko00970 Aminoacyl-tRNA biosynthesis	KOG2509, KOG2509, KOG2509, Seryl-tRNA synthetase [Translation, ribosomal structure and biogenesis]. 3.82e-66	sp|P38705|SYSM_YEAST Serine--tRNA ligase, mitochondrial OS=Saccharomyces cerevisiae (strain ATCC 204508 / S288c) GN=DIA4 PE=1 SV=1 9.91e-80	GO:0000166, nucleotide binding;GO:0000959, mitochondrial RNA metabolic process;GO:0003674, molecular_function;GO:0003824, catalytic activity;GO:0004812, aminoacyl-tRNA ligase activity;GO:0004828, serine-tRNA ligase activity;GO:0005488, binding;GO:0005524, ATP binding;GO:0005575, cellular_component;GO:0005622, intracellular;GO:0005623, cell;GO:0005737, cytoplasm;GO:0005739, mitochondrion;GO:000608…	XP_039275160.1 LOW QUALITY PROTEIN: serine--tRNA ligase, mitochondrial-like [Nilaparvata lugens] 2.69e-182	-
TRINITY_DN12088_c0_g1	0.327233	2.83951	-3.11725	0.00116273	0.00938972	down	-	-	-	-	-	-	-	-
TRINITY_DN11512_c0_g1	2.80222	24.3021	-3.11644	5.75105e-06	0.000110259	down	-	-	-	-	-	-	-	-
TRINITY_DN12807_c0_g2	2.50205	21.6376	-3.11236	1.13038e-07	3.42917e-06	down	cd19075, AKR_AKR7A1-5, AKR7A family of aldo-keto reductase (AKR). Aflatoxin B1 aldehyde reductase member 1/3 (AKR7A1/AKR7A3/AFAR) from Rattus norvegicus, aflatoxin B1 aldehyde reductase member 2 (AKR7A2/AFAR1/AFAR) and aflatoxin B1 aldehyde reductase member 3 (AKR7A3/AFAR2) from Homo sapiens, aflatoxin B1 aldehyde reductase member 2 (AKR7A2/AFAR2) from Rattus norvegicus, and aflatoxin B1 aldehyde…	pfam00248, Aldo_ket_red, Aldo/keto reductase family. This family includes a number of K+ ion channel beta chain regulatory domains - these are reported to have oxidoreductase activity. 1.46e-23	K15303-ko00980 Metabolism of xenobiotics by cytochrome P450	KOG1575, KOG1575, KOG1575, Voltage-gated shaker-like K+ channel, subunit beta/KCNAB [Energy production and conversion]. 8.50e-19	sp|P38918|ARK73_RAT Aflatoxin B1 aldehyde reductase member 3 OS=Rattus norvegicus GN=Akr7a3 PE=1 SV=2 3.57e-69	-	CAF0784855.1 unnamed protein product [Adineta steineri] >CAF3811568.1 unnamed protein product [Adineta steineri] 1.56e-91	-
TRINITY_DN10035_c0_g1	30.5728	263.661	-3.10836	6.912e-06	0.000130161	down	cd05283, CAD1, Cinnamyl alcohol dehydrogenases (CAD). Cinnamyl alcohol dehydrogenases (CAD), members of the medium chain dehydrogenase/reductase family, reduce cinnamaldehydes to cinnamyl alcohols in the last step of monolignal metabolism in plant cells walls. CAD binds 2 zinc ions and is NADPH- dependent. CAD family members are also found in non-plant species, e.g. in yeast where they have an al…	pfam01532, Glyco_hydro_47, Glycosyl hydrolase family 47. Members of this family are alpha-mannosidases that catalyze the hydrolysis of the terminal 1,2-linked alpha-D-mannose residues in the oligo-mannose oligosaccharide Man(9)(GlcNAc)(2). 8.30e-123	K01230-ko00510 N-Glycan biosynthesis;ko04141 Protein processing in endoplasmic reticulum;ko00513 Various types of N-glycan biosynthesis	KOG0023, KOG0023, KOG0023, Alcohol dehydrogenase, class V [Secondary metabolites biosynthesis, transport and catabolism]. 1.00e-65	sp|Q04894|ADH6_YEAST NADP-dependent alcohol dehydrogenase 6 OS=Saccharomyces cerevisiae (strain ATCC 204508 / S288c) GN=ADH6 PE=1 SV=1 7.86e-87	-	XP_023687302.1 endoplasmic reticulum mannosyl-oligosaccharide 1,2-alpha-mannosidase-like isoform X2 [Paramormyrops kingsleyae] 8.55e-67	-
TRINITY_DN9454_c0_g1	2.31266	19.9375	-3.10786	2.92174e-05	0.000447988	down	cd08249, enoyl_reductase_like, enoyl_reductase_like. Member identified as possible enoyl reductase of the MDR family. 2-enoyl thioester reductase (ETR) catalyzes the NADPH-dependent dependent conversion of trans-2-enoyl acyl carrier protein/coenzyme A (ACP/CoA) to acyl-(ACP/CoA) in fatty acid synthesis. 2-enoyl thioester reductase activity has been linked in Candida tropicalis as essential in mai…	-	-	KOG1198, KOG1198, KOG1198, Zinc-binding oxidoreductase [Energy production and conversion, General function prediction only]. 3.43e-09	sp|P54006|TOXD_COCCA Protein TOXD OS=Cochliobolus carbonum GN=TOXD PE=3 SV=1 1.59e-67	-	KAJ3026675.1 hypothetical protein HDU68_005261 [Siphonaria sp. JEL0065] 1.73e-90	-
TRINITY_DN8528_c0_g1	3.86151	33.1747	-3.10284	0.000121137	0.00147912	down	-	-	-	-	-	-	-	-
TRINITY_DN15937_c0_g1	3.04905	26.1123	-3.0983	6.31183e-07	1.60781e-05	down	cd00779, ProRS_core_prok, Prolyl-tRNA synthetase (ProRS) class II core catalytic domain. ProRS is a homodimer. It is responsible for the attachment of proline to the 3' OH group of ribose of the appropriate tRNA. This domain is primarily responsible for ATP-dependent formation of the enzyme bound aminoacyl-adenylate. Class II assignment is based upon its structure and the presence of three charac…	-	K01881-ko00970 Aminoacyl-tRNA biosynthesis	KOG2324, KOG2324, KOG2324, Prolyl-tRNA synthetase [Translation, ribosomal structure and biogenesis]. 1.59e-29	sp|A0L8I2|SYP_MAGMM Proline--tRNA ligase OS=Magnetococcus marinus (strain ATCC BAA-1437 / JCM 17883 / MC-1) GN=proS PE=3 SV=1 7.07e-97	GO:0003674, molecular_function;GO:0003824, catalytic activity;GO:0004812, aminoacyl-tRNA ligase activity;GO:0004827, proline-tRNA ligase activity;GO:0005575, cellular_component;GO:0005622, intracellular;GO:0005623, cell;GO:0005737, cytoplasm;GO:0005739, mitochondrion;GO:0006082, organic acid metabolic process;GO:0006139, nucleobase-containing compound metabolic process;GO:0006399, tRNA metabolic …	XP_022186091.2 LOW QUALITY PROTEIN: probable proline--tRNA ligase, mitochondrial [Nilaparvata lugens] 4.61e-144	-
TRINITY_DN14263_c0_g1	0.998517	8.5327	-3.09514	0.000410756	0.00411761	down	-	-	-	-	-	-	-	-
TRINITY_DN732_c0_g1	3.06853	26.1834	-3.09303	1.4448e-05	0.000247172	down	cd07061, HP_HAP_like, Histidine phosphatase domain found in histidine acid phosphatases and phytases; contains a His residue which is phosphorylated during the reaction. Catalytic domain of HAP (histidine acid phosphatases) and phytases (myo-inositol hexakisphosphate phosphohydrolases). The conserved catalytic core of this domain contains a His residue which is phosphorylated in the reaction. Fun…	pfam00328, His_Phos_2, Histidine phosphatase superfamily (branch 2). The histidine phosphatase superfamily is so named because catalysis centers on a conserved His residue that is transiently phosphorylated during the catalytic cycle. Other conserved residues contribute to a 'phosphate pocket' and interact with the phospho group of substrate before, during and after its transfer to the His residu…	-	KOG1382, KOG1382, KOG1382, Multiple inositol polyphosphate phosphatase [General function prediction only]. 2.47e-24	sp|P52291|PPA1_PICPA Acid phosphatase PHO1 OS=Komagataella pastoris GN=PHO1 PE=2 SV=1 7.83e-34	-	CAF0840388.1 unnamed protein product [Didymodactylos carnosus] >CAF1007219.1 unnamed protein product [Didymodactylos carnosus] >CAF3627728.1 unnamed protein product [Didymodactylos carnosus] >CAF3776237.1 unnamed protein product [Didymodactylos carnosus] 3.86e-89	-
TRINITY_DN8964_c0_g1	2.53578	21.6136	-3.09144	8.46948e-06	0.000155797	down	-	-	-	-	-	-	-	-
TRINITY_DN14133_c1_g7	9.73114	82.4106	-3.08215	1.32857e-06	3.08165e-05	down	-	pfam00566, RabGAP-TBC, Rab-GTPase-TBC domain. Identification of a TBC domain in GYP6_YEAST and GYP7_YEAST, which are GTPase activator proteins of yeast Ypt6 and Ypt7, implies that these domains are GTPase activator proteins of Rab-like small GTPases. 1.59e-27	-	KOG4347, KOG4347, KOG4347, GTPase-activating protein VRP [General function prediction only]. 3.31e-103	sp|C8VDQ4|GYP2_EMENI Putative GTPase-activating protein AN11010 OS=Emericella nidulans (strain FGSC A4 / ATCC 38163 / CBS 112.46 / NRRL 194 / M139) GN=AN11010 PE=3 SV=1 0.0	GO:0003674, molecular_function;GO:0005096, GTPase activator activity;GO:0005488, binding;GO:0005509, calcium ion binding;GO:0005515, protein binding;GO:0005575, cellular_component;GO:0005622, intracellular;GO:0005623, cell;GO:0005737, cytoplasm;GO:0006810, transport;GO:0006886, intracellular protein transport;GO:0008047, enzyme activator activity;GO:0008104, protein localization;GO:0008150, biolo…	XP_033118031.1 TBC1 domain family member 9-like isoform X3 [Anneissia japonica] 2.34e-73	-
TRINITY_DN13162_c0_g1	9.69121	81.5041	-3.07212	0.000368837	0.00376569	down	cd13851, CuRO_1_Fet3p, The first Cupredoxin domain of multicopper oxidase Fet3P. Fet3p catalyzes the ferroxidase reaction, which couples the oxidation of Fe(II) to Fe(III) and a four-electron reduction of molecular oxygen to water. Fet3p is a type I membrane protein with the amino-terminal oxidase domain in the exocellular space and the carboxyl terminus in the cytoplasm. The periplamic produced …	pfam07732, Cu-oxidase_3, Multicopper oxidase. This entry contains many divergent copper oxidase-like domains that are not recognized by the pfam00394 model. 5.77e-26	-	KOG1263, KOG1263, KOG1263, Multicopper oxidases [Secondary metabolites biosynthesis, transport and catabolism]. 5.97e-48	sp|Q4WZB4|ABR1_ASPFU Multicopper oxidase abr1 OS=Neosartorya fumigata (strain ATCC MYA-4609 / Af293 / CBS 101355 / FGSC A1100) GN=abr1 PE=2 SV=2 3.42e-107	GO:0006582, melanin metabolic process;GO:0006725, cellular aromatic compound metabolic process;GO:0008150, biological_process;GO:0008152, metabolic process;GO:0009058, biosynthetic process;GO:0009987, cellular process;GO:0018958, phenol-containing compound metabolic process;GO:0019438, aromatic compound biosynthetic process;GO:0019748, secondary metabolic process;GO:0042438, melanin biosynthetic …	XP_039299614.1 LOW QUALITY PROTEIN: iron transport multicopper oxidase fetC-like [Nilaparvata lugens] 6.91e-91	-
TRINITY_DN4040_c0_g1	0.606837	5.0925	-3.06899	4.84086e-05	0.000686743	down	-	-	-	-	sp|P40489|XBP1_YEAST Transcriptional repressor XBP1 OS=Saccharomyces cerevisiae (strain ATCC 204508 / S288c) GN=XBP1 PE=1 SV=1 1.12e-07	GO:0000082, G1/S transition of mitotic cell cycle;GO:0000083, regulation of transcription involved in G1/S transition of mitotic cell cycle;GO:0000122, negative regulation of transcription by RNA polymerase II;GO:0000228, nuclear chromosome;GO:0000278, mitotic cell cycle;GO:0000785, chromatin;GO:0000790, nuclear chromatin;GO:0000981, RNA polymerase II transcription factor activity, sequence-speci…	-	-
TRINITY_DN9352_c0_g1	20.7674	174.265	-3.06889	2.86485e-09	1.32419e-07	down	-	-	-	-	-	-	-	-
TRINITY_DN10921_c0_g1	2.32287	19.4844	-3.06834	1.09947e-06	2.61711e-05	down	-	-	-	-	-	-	-	-
TRINITY_DN10816_c0_g1	4.38189	36.6532	-3.06431	0.000217343	0.00242764	down	-	pfam10528, GLEYA, GLEYA domain. The GLEYA domain is related to lectin-like binding domains found in the S. cerevisiae Flo proteins and the C. glabrata Epa proteins. It is a carbohydrate-binding domain that is found in fungal adhesins (also referred to as agglutinins or flocculins). Adhesins with a GLEYA domain possess a typical N-terminal signal peptide and a domain of conserved sequence repeats,…	-	-	-	-	-	-
TRINITY_DN14100_c3_g8	3.63726	30.2566	-3.05633	7.1163e-07	1.79832e-05	down	-	pfam01474, DAHP_synth_2, Class-II DAHP synthetase family. Members of this family are aldolase enzymes that catalyze the first step of the shikimate pathway. 1.33e-65	K01626-ko00400 Phenylalanine, tyrosine and tryptophan biosynthesis;ko02024 Quorum sensing;ko01230 Biosynthesis of amino acids	-	sp|P80576|AROF_NEUCR Phospho-2-dehydro-3-deoxyheptonate aldolase OS=Neurospora crassa (strain ATCC 24698 / 74-OR23-1A / CBS 708.71 / DSM 1257 / FGSC 987) GN=aro-8 PE=1 SV=2 3.27e-90	-	KAJ3024763.1 hypothetical protein HDU68_007798 [Siphonaria sp. JEL0065] 1.02e-62	-
TRINITY_DN7762_c0_g1	1.00187	8.32776	-3.05524	0.00228955	0.0158943	down	-	-	-	-	-	-	-	-
TRINITY_DN11025_c0_g1	0.850579	7.02553	-3.04609	6.3323e-05	0.000859935	down	cd17476, MFS_Amf1_MDR_like, Saccharomyces cerevisiae low affinity ammonium transporter Amf1p/YOR378W, aminotriazole resistance protein Atr1p, and similar transporters of the Major Facilitator Superfamily. Saccharomyces cerevisiae Amf1p/Ammonium Facilitator 1/YOR378W functions as a low affinity NH4+ transporter. S. cerevisiae aminotriazole resistance protein (Atr1p) is required for controlling sen…	-	-	-	sp|Q9P6J7|YHD3_SCHPO Uncharacterized MFS-type transporter C1683.03c OS=Schizosaccharomyces pombe (strain 972 / ATCC 24843) GN=SPBC1683.03c PE=3 SV=1 1.12e-72	-	CAF1199307.1 unnamed protein product [Adineta steineri] 4.19e-68	-
TRINITY_DN15979_c0_g1	3.14248	25.8076	-3.03782	6.04356e-06	0.000115334	down	cd19144, AKR_AKR13A1, AKR13A family of aldo-keto reductase (AKR). Schizosaccharomyces pombe aldo-keto reductase YakC is a founding member of aldo-keto reductase family 13 member A1 (AKR13A1). It catalyzes the reversible reduction of ketones to the respective alcohols using NADP(+) as a hydride donor. 4.50e-108	pfam00248, Aldo_ket_red, Aldo/keto reductase family. This family includes a number of K+ ion channel beta chain regulatory domains - these are reported to have oxidoreductase activity. 8.46e-45	-	KOG1575, KOG1575, KOG1575, Voltage-gated shaker-like K+ channel, subunit beta/KCNAB [Energy production and conversion]. 3.11e-53	sp|Q09923|YAKC_SCHPO Aldo-keto reductase yakc [NADP(+)] OS=Schizosaccharomyces pombe (strain 972 / ATCC 24843) GN=yakc PE=1 SV=1 2.27e-91	GO:0003674, molecular_function;GO:0003824, catalytic activity;GO:0008150, biological_process;GO:0008152, metabolic process;GO:0016491, oxidoreductase activity;GO:0016614, oxidoreductase activity, acting on CH-OH group of donors;GO:0055114, oxidation-reduction process	CAF3543246.1 unnamed protein product [Adineta steineri] 8.81e-105	-
TRINITY_DN13583_c0_g1	4.95003	40.6482	-3.03768	0.000378433	0.00384821	down	cd01311, PDC_hydrolase, 2-pyrone-4,6-dicarboxylic acid (PDC) hydrolase hydrolyzes PDC to yield 4-oxalomesaconic acid (OMA) or its tautomer, 4-carboxy-2-hydroxymuconic acid (CHM). This reaction is part of the protocatechuate (PCA) 4,5-cleavage pathway. PCA is one of the most important intermediate metabolites in the bacterial pathways for various phenolic compounds, including lignin, which is the …	pfam02615, Ldh_2, Malate/L-lactate dehydrogenase. This family consists of bacterial and archaeal Malate/L-lactate dehydrogenase. L-lactate dehydrogenase, EC:1.1.1.27, catalyzes the reaction (S)-lactate + NAD(+) <=> pyruvate + NADH. Malate dehydrogenase, EC:1.1.1.37 and EC:1.1.1.82, catalyzes the reactions: (S)-malate + NAD(+) <=> oxaloacetate + NADH, and (S)-malate + NADP(+) <=> oxaloacetate + NA…	-	KOG4153, KOG4153, KOG4153, Fructose 1,6-bisphosphate aldolase [Carbohydrate transport and metabolism]. 1.75e-14	sp|Q58820|COMC_METJA L-sulfolactate dehydrogenase OS=Methanocaldococcus jannaschii (strain ATCC 43067 / DSM 2661 / JAL-1 / JCM 10045 / NBRC 100440) GN=comC PE=1 SV=1 1.33e-54	-	KAH9499210.1 hypothetical protein Btru_004456 [Bulinus truncatus] 1.37e-55	-
TRINITY_DN9563_c0_g1	1.42318	11.6849	-3.03746	4.91852e-06	9.64804e-05	down	cd17358, MFS_GLUT6_8_Class3_like, Glucose transporter (GLUT) types 6 and 8, Class 3 GLUTs, and similar transporters of the Major Facilitator Superfamily. This subfamily is composed of glucose transporter type 6 (GLUT6), GLUT8, plant early dehydration-induced gene ERD6-like proteins, and similar insect proteins including facilitated trehalose transporter Tret1-1. GLUTs, also called Solute carrier …	pfam00083, Sugar_tr, Sugar (and other) transporter. 1.37e-60	-	KOG0254, KOG0254, KOG0254, Predicted transporter (major facilitator superfamily) [General function prediction only]. 1.42e-48	sp|P39932|STL1_YEAST Sugar transporter STL1 OS=Saccharomyces cerevisiae (strain ATCC 204508 / S288c) GN=STL1 PE=1 SV=2 4.13e-93	-	CAF0749174.1 unnamed protein product [Didymodactylos carnosus] >CAF3527612.1 unnamed protein product [Didymodactylos carnosus] 3.15e-68	-
TRINITY_DN14410_c0_g1	2.36574	19.3915	-3.03506	1.34806e-06	3.10984e-05	down	cd01299, Met_dep_hydrolase_A, Metallo-dependent hydrolases, subgroup A is part of the superfamily of metallo-dependent hydrolases, a large group of proteins that show conservation in their 3-dimensional fold (TIM barrel) and in details of their active site. The vast majority of the members have a conserved metal binding site, involving four histidines and one aspartic acid residue. In the common …	-	-	-	sp|P68916|Y2939_MYCBO Uncharacterized protein Mb2939c OS=Mycobacterium bovis (strain ATCC BAA-935 / AF2122/97) GN=Mb2939c PE=4 SV=1 2.70e-09	-	CAF1173199.1 unnamed protein product [Adineta steineri] >CAF1404202.1 unnamed protein product [Adineta steineri] 4.25e-52	-
TRINITY_DN9026_c0_g1	0.669957	5.48987	-3.03463	0.00032418	0.00337758	down	cd13994, STKc_HAL4_like, Catalytic domain of Fungal Halotolerance protein 4-like Serine/Threonine kinases. STKs catalyze the transfer of the gamma-phosphoryl group from ATP to serine/threonine residues on protein substrates. This subfamily is composed of HAL4, Saccharomyces cerevisiae Ptk2/Stk2, and similar fungal proteins. Proteins in this subfamily are involved in regulating ion transporters. I…	pfam07714, Pkinase_Tyr, Protein tyrosine kinase. 1.75e-10	-	KOG0590, KOG0590, KOG0590, Checkpoint kinase and related serine/threonine protein kinases [Cell cycle control, cell division, chromosome partitioning]. 2.09e-13	sp|P25333|HAL4_YEAST Serine/threonine-protein kinase HAL4/SAT4 OS=Saccharomyces cerevisiae (strain ATCC 204508 / S288c) GN=SAT4 PE=1 SV=1 6.19e-101	-	KAJ3019098.1 serine/threonine-protein kinase HAL4/sat4 [Siphonaria sp. JEL0065] 1.90e-46	-
TRINITY_DN12533_c0_g1	1.10285	9.01884	-3.03171	0.000182275	0.00208918	down	cd05324, carb_red_PTCR-like_SDR_c, Porcine testicular carbonyl reductase (PTCR)-like, classical (c) SDRs. PTCR is a classical SDR which catalyzes the NADPH-dependent reduction of ketones on steroids and prostaglandins. Unlike most SDRs, PTCR functions as a monomer. This subgroup also includes human carbonyl reductase 1 (CBR1) and CBR3. CBR1 is an NADPH-dependent SDR with broad substrate specifici…	pfam13561, adh_short_C2, Enoyl-(Acyl carrier protein) reductase. 4.94e-08	-	KOG1208, KOG1208, KOG1208, Dehydrogenases with different specificities (related to short-chain alcohol dehydrogenases) [Secondary metabolites biosynthesis, transport and catabolism]. 8.05e-12	sp|Q9VLU5|WWOX_DROME WW domain-containing oxidoreductase OS=Drosophila melanogaster GN=Wwox PE=2 SV=1 4.03e-12	-	CAF1017766.1 unnamed protein product [Rotaria sordida] >CAF1046502.1 unnamed protein product [Rotaria sordida] >CAF1196970.1 unnamed protein product [Rotaria sordida] >CAF1207808.1 unnamed protein product [Rotaria sordida] >CAF3586670.1 unnamed protein product [Rotaria sordida] 2.03e-21	-
TRINITY_DN13443_c0_g1	36.8847	301.287	-3.03004	9.75292e-10	5.08071e-08	down	-	-	-	-	-	-	-	-
TRINITY_DN11687_c0_g1	56.369	459.839	-3.02815	5.12693e-05	0.000722833	down	-	-	-	-	-	-	-	-
TRINITY_DN11797_c0_g1	0.914771	7.46133	-3.02795	3.09074e-06	6.39843e-05	down	-	pfam04928, PAP_central, Poly(A) polymerase central domain. The central domain of Poly(A) polymerase shares structural similarity with the allosteric activity domain of ribonucleotide reductase R1, which comprises a four-helix bundle and a three-stranded mixed beta- sheet. Even though the two enzymes bind ATP, the ATP-recognition motifs are different. 3.01e-22	-	KOG2245, KOG2245, KOG2245, Poly(A) polymerase and related nucleotidyltransferases [RNA processing and modification]. 7.54e-24	sp|Q9LMT2|PAPS1_ARATH Nuclear poly(A) polymerase 1 OS=Arabidopsis thaliana GN=PAPS1 PE=1 SV=1 1.20e-24	-	XP_034384082.1 poly(A) polymerase type 3-like [Cyclopterus lumpus] 1.79e-21	-
TRINITY_DN6752_c0_g1	1.37031	11.1578	-3.02548	4.4838e-06	8.87751e-05	down	cd08586, PI-PLCc_BcPLC_like, Catalytic domain of Bacillus cereus phosphatidylinositol-specific phospholipases C and similar proteins. This subfamily corresponds to the catalytic domain present in Bacillus cereus phosphatidylinositol-specific phospholipase C (PI-PLC, EC 4.6.1.13) and its sequence homologs found in bacteria and eukaryota. Bacterial PI-PLCs participate in Ca2+-independent PI metabol…	-	K01771-ko00562 Inositol phosphate metabolism	-	sp|P08954|PLC_BACTU 1-phosphatidylinositol phosphodiesterase OS=Bacillus thuringiensis PE=1 SV=1 6.29e-21	-	XP_052087385.1 1-phosphatidylinositol phosphodiesterase-like [Mytilus californianus] 4.26e-20	-
TRINITY_DN17034_c0_g1	3.35909	27.1629	-3.01549	0.000146892	0.00174645	down	cd02233, cupin_HNL-like, Granulicella tundricola hydroxynitrile lyase (GtHNL) and related proteins, cupin domain. This family includes archaeal, eukaryotic, and bacterial proteins homologous to hydroxynitrile lyase from Granulicella tundricola (GtHNL), a novel class of HNLs that does not show any sequence or structural similarity to any other HNL and does not contain conserved motifs typical of H…	-	-	-	-	-	-	-
TRINITY_DN7898_c0_g1	5.19294	41.9582	-3.01433	1.01588e-06	2.45493e-05	down	-	-	-	-	-	-	-	-
TRINITY_DN10797_c0_g2	2.0214	16.2274	-3.00501	0.00439499	0.0262646	down	-	-	-	-	-	-	-	-
TRINITY_DN8032_c0_g1	0.789607	6.33203	-3.00346	0.000521501	0.00497657	down	-	pfam01593, Amino_oxidase, Flavin containing amine oxidoreductase. This family consists of various amine oxidases, including maze polyamine oxidase (PAO) and various flavin containing monoamine oxidases (MAO). The aligned region includes the flavin binding site of these enzymes. The family also contains phytoene dehydrogenases and related enzymes. In vertebrates MAO plays an important role regulat…	-	KOG0029, KOG0029, KOG0029, Amine oxidase [Secondary metabolites biosynthesis, transport and catabolism]. 8.30e-09	sp|P46882|AOFN_ASPNG Monoamine oxidase N OS=Aspergillus niger GN=maoN PE=1 SV=1 4.51e-88	-	UJR14243.1 hypothetical protein I4U23_001234 [Adineta vaga] 2.47e-39	-
TRINITY_DN13768_c3_g1	68.3707	548.251	-3.00339	2.05193e-05	0.00033099	down	-	-	K00472-ko00330 Arginine and proline metabolism	KOG1591, KOG1591, KOG1591, Prolyl 4-hydroxylase alpha subunit [Amino acid transport and metabolism]. 2.41e-10	sp|F4J0A8|P4H6_ARATH Probable prolyl 4-hydroxylase 6 OS=Arabidopsis thaliana GN=P4H6 PE=2 SV=1 7.63e-12	-	CAF1160268.1 unnamed protein product [Adineta ricciae] 1.84e-24	-
TRINITY_DN651_c0_g1	1.15192	9.22007	-3.00074	0.00182864	0.0134436	down	-	pfam01915, Glyco_hydro_3_C, Glycosyl hydrolase family 3 C-terminal domain. This domain is involved in catalysis and may be involved in binding beta-glucan. This domain is found associated with pfam00933. 1.03e-19	K05349-ko00500 Starch and sucrose metabolism;ko00940 Phenylpropanoid biosynthesis;ko00460 Cyanoamino acid metabolism	-	sp|B8NJF4|BGLD_ASPFN Probable beta-glucosidase D OS=Aspergillus flavus (strain ATCC 200026 / FGSC A1120 / NRRL 3357 / JCM 12722 / SRRC 167) GN=bglD PE=3 SV=2 3.40e-116	-	CAF0736203.1 unnamed protein product [Adineta steineri] 8.94e-75	-
TRINITY_DN13986_c1_g1	1.86832	14.9361	-2.99899	0.000132126	0.00158888	down	-	-	-	-	sp|O94336|YHM3_SCHPO Uncharacterized FCP1 homology domain-containing protein C1271.03c OS=Schizosaccharomyces pombe (strain 972 / ATCC 24843) GN=SPBC1271.03c PE=3 SV=1 1.14e-26	GO:0003674, molecular_function;GO:0003824, catalytic activity;GO:0004721, phosphoprotein phosphatase activity;GO:0005575, cellular_component;GO:0005623, cell;GO:0005886, plasma membrane;GO:0006464, cellular protein modification process;GO:0006470, protein dephosphorylation;GO:0006793, phosphorus metabolic process;GO:0006796, phosphate-containing compound metabolic process;GO:0006807, nitrogen com…	CAF0743332.1 unnamed protein product [Didymodactylos carnosus] >CAF0773283.1 unnamed protein product [Didymodactylos carnosus] >CAF3521075.1 unnamed protein product [Didymodactylos carnosus] >CAF3555615.1 unnamed protein product [Didymodactylos carnosus] 9.23e-10	-
TRINITY_DN11420_c0_g1	1.91816	15.3132	-2.99698	2.50522e-07	6.95281e-06	down	cd17323, MFS_Tpo1_MDR_like, Yeast Polyamine transporter 1 (Tpo1) and similar multidrug resistance (MDR) transporters of the Major Facilitator Superfamily. This family is composed of fungal multidrug resistance (MDR) transporters including several proteins from Saccharomyces cerevisiae such as polyamine transporters 1-4 (Tpo1-4), quinidine resistance proteins 1-3 (Qdr1-3), dityrosine transporter 1…	-	-	KOG0255, KOG0255, KOG0255, Synaptic vesicle transporter SVOP and related transporters (major facilitator superfamily) [General function prediction only]. 1.42e-23	sp|D7PHY8|VRTL_PENAE Efflux pump vrtL OS=Penicillium aethiopicum GN=vrtL PE=1 SV=1 4.83e-58	-	CAF1212513.1 unnamed protein product [Adineta steineri] >CAF1494558.1 unnamed protein product [Adineta steineri] 9.18e-34	-
TRINITY_DN10904_c0_g1	0.915554	7.30903	-2.99696	3.44932e-05	0.000515231	down	-	pfam00172, Zn_clus, Fungal Zn(2)-Cys(6) binuclear cluster domain. 3.61e-07	-	-	sp|P41765|AFLR_ASPFN Aflatoxin biosynthesis regulatory protein OS=Aspergillus flavus (strain ATCC 200026 / FGSC A1120 / NRRL 3357 / JCM 12722 / SRRC 167) GN=aflR PE=3 SV=2 1.23e-07	-	-	-
TRINITY_DN8952_c0_g1	5.29005	42.0835	-2.9919	2.5927e-06	5.54812e-05	down	-	pfam03006, HlyIII, Haemolysin-III related. Members of this family are integral membrane proteins. This family includes a protein with hemolytic activity from Bacillus cereus. It has been proposed that YOL002c encodes a Saccharomyces cerevisiae protein that plays a key role in metabolic pathways that regulate lipid and phosphate metabolism. In eukaryotes, members are seven-transmembrane pass molec…	K07297-ko04920 Adipocytokine signaling pathway;ko04152 AMPK signaling pathway;ko04211 Longevity regulating pathway - mammal	KOG0748, KOG0748, KOG0748, Predicted membrane proteins, contain hemolysin III domain [General function prediction only, Signal transduction mechanisms]. 7.72e-56	sp|Q09749|ADRL_SCHPO ADIPOR-like receptor SPBC12C2.09c OS=Schizosaccharomyces pombe (strain 972 / ATCC 24843) GN=SPBC12C2.09c PE=3 SV=1 2.18e-73	GO:0000122, negative regulation of transcription by RNA polymerase II;GO:0000322, storage vacuole;GO:0000323, lytic vacuole;GO:0000324, fungal-type vacuole;GO:0003674, molecular_function;GO:0005488, binding;GO:0005515, protein binding;GO:0005575, cellular_component;GO:0005622, intracellular;GO:0005623, cell;GO:0005737, cytoplasm;GO:0005773, vacuole;GO:0005886, plasma membrane;GO:0006355, regulati…	VDL95088.1 unnamed protein product [Schistocephalus solidus] 1.70e-74	-
TRINITY_DN7004_c0_g1	1.94274	15.3868	-2.98553	0.00149523	0.0115118	down	cd03469, Rieske_RO_Alpha_N, Rieske non-heme iron oxygenase (RO) family, N-terminal Rieske domain of the oxygenase alpha subunit; The RO family comprise a large class of aromatic ring-hydroxylating dioxygenases found predominantly in microorganisms. These enzymes enable microorganisms to tolerate and even exclusively utilize aromatic compounds for growth. ROs consist of two or three components: re…	pfam00355, Rieske, Rieske [2Fe-2S] domain. The rieske domain has a [2Fe-2S] centre. Two conserved cysteines coordinate one Fe ion, while the other Fe ion is coordinated by two conserved histidines. In hyperthermophilic archaea there is a SKTPCX(2-3)C motif at the C-terminus. The cysteines in this motif form a disulphide bridge, which stabilizes the protein. 5.97e-06	-	-	sp|P0ABR7|YEAW_ECOLI Putative dioxygenase subunit alpha YeaW OS=Escherichia coli (strain K12) GN=yeaW PE=3 SV=1 3.28e-36	-	KMQ81697.1 rieske domain-containing protein, partial [Lasius niger] 4.81e-46	-
TRINITY_DN11253_c0_g1	0.882749	6.97125	-2.98134	0.000307782	0.00324665	down	cd09807, retinol-DH_like_SDR_c, retinol dehydrogenases (retinol-DHs), classical (c) SDRs. Classical SDR-like subgroup containing retinol-DHs and related proteins. Retinol is processed by a medium chain alcohol dehydrogenase followed by retinol-DHs. Proteins in this subfamily share the glycine-rich NAD-binding motif of the classical SDRs, have a partial match to the canonical active site tetrad, b…	-	-	KOG1208, KOG1208, KOG1208, Dehydrogenases with different specificities (related to short-chain alcohol dehydrogenases) [Secondary metabolites biosynthesis, transport and catabolism]. 1.69e-09	sp|G3Y422|YAND_ASPNA Short chain dehydrogenase yanD OS=Aspergillus niger (strain ATCC 1015 / CBS 113.46 / FGSC A1144 / LSHB Ac4 / NCTC 3858a / NRRL 328 / USDA 3528.7) GN=yanD PE=1 SV=2 7.86e-26	-	XP_017319503.1 retinol dehydrogenase 12 [Ictalurus punctatus] 3.27e-24	-
TRINITY_DN11819_c0_g1	13.0732	103.097	-2.97932	0.000447407	0.00439569	down	cd05368, DHRS6_like_SDR_c, human DHRS6-like, classical (c) SDRs. Human DHRS6, and similar proteins. These proteins are classical SDRs, with a canonical active site tetrad and a close match to the typical Gly-rich NAD-binding motif. Human DHRS6 is a cytosolic type 2 (R)-hydroxybutyrate dehydrogenase, which catalyses the conversion of (R)-hydroxybutyrate to acetoacetate. Also included in this subgr…	pfam00106, adh_short, short chain dehydrogenase. This family contains a wide variety of dehydrogenases. 1.01e-21	-	KOG1201, KOG1201, KOG1201, Hydroxysteroid 17-beta dehydrogenase 11 [Secondary metabolites biosynthesis, transport and catabolism]. 7.00e-17	sp|A0A097ZPE8|ANDI_EMEVA Short chain dehydrogenase andI OS=Emericella variicolor GN=andI PE=1 SV=1 3.75e-44	-	CAF1510412.1 unnamed protein product [Didymodactylos carnosus] >CAF1598101.1 unnamed protein product [Didymodactylos carnosus] >CAF4298374.1 unnamed protein product [Didymodactylos carnosus] >CAF4473890.1 unnamed protein product [Didymodactylos carnosus] 3.36e-19	-
TRINITY_DN9635_c0_g1	0.262848	2.07149	-2.97837	0.00371625	0.0230201	down	-	pfam01425, Amidase, Amidase. 5.12e-24	K01426-ko00627 Aminobenzoate degradation;ko00643 Styrene degradation;ko00360 Phenylalanine metabolism;ko00380 Tryptophan metabolism;ko00330 Arginine and proline metabolism	KOG1211, KOG1211, KOG1211, Amidases [Translation, ribosomal structure and biogenesis]. 1.16e-26	sp|D4B3C8|A2965_ARTBC Putative amidase ARB_02965 OS=Arthroderma benhamiae (strain ATCC MYA-4681 / CBS 112371) GN=ARB_02965 PE=1 SV=1 1.66e-147	-	CAF0978531.1 unnamed protein product [Adineta steineri] 1.09e-124	-
TRINITY_DN13103_c0_g2	1.50225	11.8254	-2.9767	0.00121787	0.0097238	down	-	-	-	-	-	-	-	-
TRINITY_DN12006_c0_g1	19.6268	154.423	-2.97599	6.05676e-07	1.54904e-05	down	cd03249, ABC_MTABC3_MDL1_MDL2, ATP-binding cassette domain of a mitochondrial protein MTABC3 and related proteins. MTABC3 (also known as ABCB6) is a mitochondrial ATP-binding cassette protein involved in iron homeostasis and one of four ABC transporters expressed in the mitochondrial inner membrane, the other three being MDL1(ABC7), MDL2, and ATM1. In fact, the yeast MDL1 (multidrug resistance-li…	pfam00664, ABC_membrane, ABC transporter transmembrane region. This family represents a unit of six transmembrane helices. Many members of the ABC transporter family (pfam00005) have two such regions. 1.45e-10	K05658-ko04976 Bile secretion;ko02010 ABC transporters	KOG0055, KOG0055, KOG0055, Multidrug/pheromone exporter, ABC superfamily [Secondary metabolites biosynthesis, transport and catabolism]. 2.67e-102	sp|P36619|PMD1_SCHPO Leptomycin B resistance protein pmd1 OS=Schizosaccharomyces pombe (strain 972 / ATCC 24843) GN=pmd1 PE=3 SV=2 9.82e-89	-	XP_038030904.1 ATP-dependent translocase ABCB1 isoform X2 [Anas platyrhynchos] 1.70e-153	-
TRINITY_DN10998_c0_g2	1.79092	13.9574	-2.96225	0.000699689	0.00629423	down	-	-	-	-	-	-	-	-
TRINITY_DN12283_c0_g1	12.3656	95.7499	-2.95293	4.48844e-05	0.000643208	down	cd05247, UDP_G4E_1_SDR_e, UDP-glucose 4 epimerase, subgroup 1, extended (e) SDRs. UDP-glucose 4 epimerase (aka UDP-galactose-4-epimerase), is a homodimeric extended SDR. It catalyzes the NAD-dependent conversion of UDP-galactose to UDP-glucose, the final step in Leloir galactose synthesis. This subgroup has the characteristic active site tetrad and NAD-binding motif of the extended SDRs. Extended…	pfam12138, Spherulin4, Spherulation-specific family 4. This protein is found in bacteria, archaea and eukaryotes. Proteins in this family are typically between 250 and 398 amino acids in length. There is a conserved NPG sequence motif and there are two completely conserved G residues that may be functionally important. Starvation will often induce spherulation - the production of spores - and thi…	K01784-ko00052 Galactose metabolism;ko00520 Amino sugar and nucleotide sugar metabolism	KOG1371, KOG1371, KOG1371, UDP-glucose 4-epimerase/UDP-sulfoquinovose synthase [Cell wall/membrane/envelope biogenesis]. 3.42e-69	sp|Q553X7|GALE_DICDI UDP-glucose 4-epimerase OS=Dictyostelium discoideum GN=galE PE=1 SV=1 2.08e-91	-	XP_033644870.1 UDP-glucose 4-epimerase-like [Asterias rubens] 3.48e-88	-
TRINITY_DN5157_c0_g1	4.03368	31.1354	-2.94838	0.00179988	0.0132859	down	-	-	-	-	-	-	CAF0925761.1 unnamed protein product [Adineta steineri] >CAF3766220.1 unnamed protein product [Adineta steineri] 1.60e-43	-
TRINITY_DN8579_c0_g1	0.55854	4.30615	-2.94667	0.0059088	0.0329127	down	cd08249, enoyl_reductase_like, enoyl_reductase_like. Member identified as possible enoyl reductase of the MDR family. 2-enoyl thioester reductase (ETR) catalyzes the NADPH-dependent dependent conversion of trans-2-enoyl acyl carrier protein/coenzyme A (ACP/CoA) to acyl-(ACP/CoA) in fatty acid synthesis. 2-enoyl thioester reductase activity has been linked in Candida tropicalis as essential in mai…	-	-	KOG1198, KOG1198, KOG1198, Zinc-binding oxidoreductase [Energy production and conversion, General function prediction only]. 9.91e-06	sp|Q9Y7D0|LOVC_ASPTE Enoyl reductase LovC OS=Aspergillus terreus GN=lovC PE=1 SV=1 1.90e-20	-	KAJ3026675.1 hypothetical protein HDU68_005261 [Siphonaria sp. JEL0065] 7.19e-32	-
TRINITY_DN7881_c0_g1	7.43202	57.2385	-2.94516	8.63389e-05	0.00111304	down	-	-	-	-	-	-	-	-
TRINITY_DN16022_c0_g1	1.41787	10.8969	-2.94213	0.000434335	0.00430978	down	-	-	-	-	-	-	-	-
TRINITY_DN10932_c0_g1	32.2098	246.933	-2.93855	1.55683e-07	4.57016e-06	down	-	-	-	-	-	-	-	-
TRINITY_DN13394_c0_g1	0.592253	4.53841	-2.9379	0.00174507	0.0129717	down	cd05374, 17beta-HSD-like_SDR_c, 17beta hydroxysteroid dehydrogenase-like, classical (c) SDRs. 17beta-hydroxysteroid dehydrogenases are a group of isozymes that catalyze activation and inactivation of estrogen and androgens. SDRs are a functionally diverse family of oxidoreductases that have a single domain with a structurally conserved Rossmann fold (alpha/beta folding pattern with a central beta…	pfam00106, adh_short, short chain dehydrogenase. This family contains a wide variety of dehydrogenases. 2.80e-11	K06123-ko00564 Glycerophospholipid metabolism;ko00565 Ether lipid metabolism	KOG1209, KOG1209, KOG1209, 1-Acyl dihydroxyacetone phosphate reductase and related dehydrogenases [Secondary metabolites biosynthesis, transport and catabolism]. 3.07e-34	sp|Q09851|AYR1_SCHPO NADPH-dependent 1-acyldihydroxyacetone phosphate reductase OS=Schizosaccharomyces pombe (strain 972 / ATCC 24843) GN=ayr1 PE=3 SV=2 5.43e-33	-	XP_007450305.1 PREDICTED: NADPH-dependent 1-acyldihydroxyacetone phosphate reductase-like, partial [Lipotes vexillifer] 8.29e-10	-
TRINITY_DN11547_c0_g1	47.5024	362.927	-2.93361	0.000330331	0.00343042	down	-	-	-	-	sp|P38680|MTR_NEUCR N amino acid transport system protein OS=Neurospora crassa (strain ATCC 24698 / 74-OR23-1A / CBS 708.71 / DSM 1257 / FGSC 987) GN=mtr PE=3 SV=2 2.46e-31	-	-	-
TRINITY_DN21547_c0_g1	0.191132	1.45837	-2.93172	0.00832937	0.0426914	down	-	pfam14269, Arylsulfotran_2, Arylsulfotransferase (ASST). 4.62e-32	-	-	-	-	-	-
TRINITY_DN9857_c0_g1	1.63652	12.4525	-2.92773	8.65765e-05	0.00111497	down	-	pfam04909, Amidohydro_2, Amidohydrolase. These proteins are amidohydrolases that are related to pfam01979. 3.59e-06	-	KOG4245, KOG4245, KOG4245, Predicted metal-dependent hydrolase of the TIM-barrel fold [General function prediction only]. 4.11e-14	sp|G3Y417|YANB_ASPNA Decarboxylase yanB OS=Aspergillus niger (strain ATCC 1015 / CBS 113.46 / FGSC A1144 / LSHB Ac4 / NCTC 3858a / NRRL 328 / USDA 3528.7) GN=yanB PE=1 SV=1 1.32e-54	-	CAF1243752.1 unnamed protein product [Adineta steineri] >CAF3817453.1 unnamed protein product [Adineta steineri] 1.14e-59	-
TRINITY_DN9128_c0_g1	0.823266	6.26241	-2.92729	8.24524e-05	0.00107382	down	cd12110, PHP_HisPPase_Hisj_like, Polymerase and Histidinol Phosphatase domain of Histidinol phosphate phosphatase of Hisj like. Bacillus subtilis YtvP HisJ has strong histidinol phosphate phosphatase (HisPPase) activity. The PHP (also called histidinol phosphatase-2/HIS2) domain is associated with several types of DNA polymerases, such as PolIIIA and family X DNA polymerases, stand alone histidin…	-	K04486-ko01230 Biosynthesis of amino acids;ko00340 Histidine metabolism	-	sp|O14059|HIS9_SCHPO Probable histidinol-phosphatase OS=Schizosaccharomyces pombe (strain 972 / ATCC 24843) GN=SPCC1672.01 PE=3 SV=1 2.61e-58	GO:0000105, histidine biosynthetic process;GO:0003674, molecular_function;GO:0003824, catalytic activity;GO:0004401, histidinol-phosphatase activity;GO:0005575, cellular_component;GO:0005622, intracellular;GO:0005623, cell;GO:0005737, cytoplasm;GO:0006082, organic acid metabolic process;GO:0006520, cellular amino acid metabolic process;GO:0006547, histidine metabolic process;GO:0006725, cellular …	XP_022800689.1 probable histidinol-phosphatase [Stylophora pistillata] >PFX19234.1 putative histidinol-phosphatase [Stylophora pistillata] 1.30e-58	-
TRINITY_DN14137_c1_g1	5.74056	43.4968	-2.92165	0.00179521	0.0132591	down	-	pfam04185, Phosphoesterase, Phosphoesterase family. This family includes both bacterial phospholipase C enzymes EC:3.1.4.3, but also eukaryotic acid phosphatases EC:3.1.3.2. 1.49e-12	-	-	sp|Q8X176|PHOA_ASPFU Acid phosphatase OS=Neosartorya fumigata (strain ATCC MYA-4609 / Af293 / CBS 101355 / FGSC A1100) GN=phoA PE=1 SV=1 2.10e-86	-	KAJ3025161.1 hypothetical protein HDU68_007409 [Siphonaria sp. JEL0065] 2.27e-32	-
TRINITY_DN11219_c0_g1	1.58585	12.0019	-2.91993	1.21376e-05	0.000213619	down	-	-	-	-	sp|D4ATS1|A7637_ARTBC Uncharacterized secreted protein ARB_07637 OS=Arthroderma benhamiae (strain ATCC MYA-4681 / CBS 112371) GN=ARB_07637 PE=1 SV=1 1.03e-08	-	-	-
TRINITY_DN10161_c0_g1	65.6795	496.664	-2.91876	0.00015174	0.00179253	down	cd05283, CAD1, Cinnamyl alcohol dehydrogenases (CAD). Cinnamyl alcohol dehydrogenases (CAD), members of the medium chain dehydrogenase/reductase family, reduce cinnamaldehydes to cinnamyl alcohols in the last step of monolignal metabolism in plant cells walls. CAD binds 2 zinc ions and is NADPH- dependent. CAD family members are also found in non-plant species, e.g. in yeast where they have an al…	-	-	KOG0023, KOG0023, KOG0023, Alcohol dehydrogenase, class V [Secondary metabolites biosynthesis, transport and catabolism]. 3.81e-40	sp|P25377|ADH7_YEAST NADP-dependent alcohol dehydrogenase 7 OS=Saccharomyces cerevisiae (strain ATCC 204508 / S288c) GN=ADH7 PE=1 SV=1 7.35e-53	-	CAF0804913.1 unnamed protein product [Didymodactylos carnosus] >CAF3588537.1 unnamed protein product [Didymodactylos carnosus] 5.01e-61	-
TRINITY_DN16734_c0_g1	0.815102	6.15704	-2.91718	0.000678837	0.00615129	down	-	-	-	-	-	-	-	-
TRINITY_DN9875_c0_g1	0.939352	7.05965	-2.90986	0.00319704	0.0205291	down	-	pfam05042, Caleosin, Caleosin related protein. This family contains plant proteins related to caleosin. Caleosins contain calcium-binding domains and have an oleosin-like association with lipid bodies. Caleosins are present at relatively low levels and are mainly bound to microsomal membrane fractions at the early stages of seed development. As the seeds mature, overall levels of caleosins increa…	-	-	sp|Q9SQ57|PXG_SESIN Peroxygenase OS=Sesamum indicum GN=SOP1 PE=1 SV=1 1.43e-06	-	-	-
TRINITY_DN12692_c0_g1	19.883	149.394	-2.90951	0.001715	0.012793	down	cd03379, beta_CA_cladeD, Carbonic anhydrases (CA) are zinc-containing enzymes that catalyze the reversible hydration of carbon dioxide in a two-step mechanism in which the nucleophilic attack of a zinc-bound hydroxide ion on carbon dioxide is followed by the regeneration of an active site by ionization of the zinc-bound water molecule and removal of a proton from the active site. CAs are ubiquito…	pfam06500, DUF1100, Alpha/beta hydrolase of unknown function (DUF1100). This family consists of several hypothetical bacterial proteins of unknown function. Members of this family have an alpha/beta hydrolase fold. 1.80e-09	-	-	sp|Q4WZB3|AYG1_ASPFU Heptaketide hydrolyase ayg1 OS=Neosartorya fumigata (strain ATCC MYA-4609 / Af293 / CBS 101355 / FGSC A1100) GN=ayg1 PE=1 SV=1 4.02e-80	-	CAF1117695.1 unnamed protein product [Rotaria sordida] >CAF1333503.1 unnamed protein product [Rotaria sordida] 3.21e-14	-
TRINITY_DN13615_c1_g1	156.707	1176.88	-2.90883	1.28793e-07	3.85197e-06	down	-	pfam06068, TIP49, TIP49 C-terminus. This family consists of the C-terminal region of several eukaryotic and archaeal RuvB-like 1 (Pontin or TIP49a) and RuvB-like 2 (Reptin or TIP49b) proteins. The N-terminal domain contains the pfam00004 domain. In zebrafish, the liebeskummer (lik) mutation, causes development of hyperplastic embryonic hearts. lik encodes Reptin, a component of a DNA-stimulated A…	-	KOG2680, KOG2680, KOG2680, DNA helicase TIP49, TBP-interacting protein [Transcription]. 0.0	sp|Q4I948|RUVB2_GIBZE RuvB-like helicase 2 OS=Gibberella zeae (strain PH-1 / ATCC MYA-4620 / FGSC 9075 / NRRL 31084) GN=RVB2 PE=3 SV=2 0.0	GO:0000123, histone acetyltransferase complex;GO:0000228, nuclear chromosome;GO:0000491, small nucleolar ribonucleoprotein complex assembly;GO:0000492, box C/D snoRNP assembly;GO:0000785, chromatin;GO:0000790, nuclear chromatin;GO:0000812, Swr1 complex;GO:0003674, molecular_function;GO:0003678, DNA helicase activity;GO:0003824, catalytic activity;GO:0004003, ATP-dependent DNA helicase activity;GO…	XP_022286963.1 ruvB-like 2 [Crassostrea virginica] 3.92e-206	Apotomis capreana genome assembly, chromosome: 16 9.03e-145
TRINITY_DN6786_c0_g1	0.257918	1.93622	-2.90826	0.00306677	0.0199191	down	-	-	-	-	-	-	-	-
TRINITY_DN11674_c0_g1	2.7972	20.9698	-2.90626	5.63334e-08	1.87449e-06	down	cd18580, ABC_6TM_ABCC_D2, Six-transmembrane helical domain 2 (TMD2) of the ABC transporters, subfamily C. This group represents the six-transmembrane domain 2 (TMD2) of the ABC transporters that belong to the ABCC subfamily, such as the sulphonylurea receptors SUR1/2 (ABCC8), the cystic fibrosis transmembrane conductance regulator (CFTR, ABCC7), Multidrug-Resistance associated Proteins (MRP1-9), …	pfam00005, ABC_tran, ABC transporter. ABC transporters for a large family of proteins responsible for translocation of a variety of compounds across biological membranes. ABC transporters are the largest family of proteins in many completely sequenced bacteria. ABC transporters are composed of two copies of this domain and two copies of a transmembrane domain pfam00664. These four domains may bel…	-	KOG0054, KOG0054, KOG0054, Multidrug resistance-associated protein/mitoxantrone resistance protein, ABC superfamily [Secondary metabolites biosynthesis, transport and catabolism]. 6.46e-08	sp|Q54U44|ABCCC_DICDI ABC transporter C family member 12 OS=Dictyostelium discoideum GN=abcC12 PE=3 SV=1 9.58e-09	-	NXC87907.1 MRP1 protein [Cercotrichas coryphoeus] 3.25e-129	-
TRINITY_DN13858_c0_g1	4.09446	30.6888	-2.90597	4.18511e-07	1.10596e-05	down	cd01321, ADGF, Adenosine deaminase-related growth factors (ADGF), a novel family of secreted growth-factors with sequence similarty to adenosine deaminase. 2.42e-06	pfam00962, A_deaminase, Adenosine/AMP deaminase. 6.38e-10	K19572-ko00230 Purine metabolism	KOG1097, KOG1097, KOG1097, Adenine deaminase/adenosine deaminase [Nucleotide transport and metabolism]. 2.14e-30	sp|P58781|CEC1A_DANRE Adenosine deaminase CECR1-A OS=Danio rerio GN=cecr1a PE=2 SV=2 6.10e-51	-	XP_001656636.2 adenosine deaminase 2 [Aedes aegypti] 3.88e-61	-
TRINITY_DN14243_c2_g2	690.596	5169.58	-2.90413	2.02043e-06	4.42052e-05	down	cd02877, GH18_hevamine_XipI_class_III, This conserved domain family includes xylanase inhibitor Xip-I, and the class III plant chitinases such as hevamine, concanavalin B, and PPL2, all of which have a glycosyl hydrolase family 18 (GH18) domain. Hevamine is a class III endochitinase that hydrolyzes the linear polysaccharide chains of chitin and peptidoglycan and is important for defense against p…	pfam08624, CRC_subunit, Chromatin remodelling complex Rsc7/Swp82 subunit. This family has been identified as a subunit of chromatin remodelling complexes. Saccharomyces cerevisiae NPL6 and its paralogue SWP82 have been identified as subunits of the RSC chromatin remodelling complex, and SWI/SNF chromatin remodelling complex respectively. 4.07e-44	-	KOG4701, KOG4701, KOG4701, Chitinase [Cell wall/membrane/envelope biogenesis]. 7.25e-27	sp|O94522|RSC7_SCHPO Chromatin structure-remodeling complex subunit rsc7 OS=Schizosaccharomyces pombe (strain 972 / ATCC 24843) GN=rsc7 PE=1 SV=1 2.82e-78	GO:0000228, nuclear chromosome;GO:0000785, chromatin;GO:0000790, nuclear chromatin;GO:0003674, molecular_function;GO:0003676, nucleic acid binding;GO:0003677, DNA binding;GO:0003682, chromatin binding;GO:0005488, binding;GO:0005575, cellular_component;GO:0005622, intracellular;GO:0005623, cell;GO:0005634, nucleus;GO:0005694, chromosome;GO:0006139, nucleobase-containing compound metabolic process;…	CAF0951395.1 unnamed protein product [Rotaria sp. Silwood1] >CAF1190885.1 unnamed protein product [Rotaria sp. Silwood1] >CAF3470920.1 unnamed protein product [Rotaria sp. Silwood1] >CAF4507192.1 unnamed protein product [Rotaria sp. Silwood1] 3.91e-32	-
TRINITY_DN11905_c0_g1	5.37268	40.1701	-2.90241	4.40964e-05	0.000634061	down	cd11059, CYP_fungal, unknown subfamily of fungal cytochrome P450s. This subfamily is composed of uncharacterized fungal cytochrome P450s. Cytochrome P450 (P450, CYP) is a large superfamily of heme-containing proteins that catalyze a variety of oxidative reactions of a large number of structurally different endogenous and exogenous compounds in organisms from all major domains of life. CYPs bind t…	pfam00067, p450, Cytochrome P450. Cytochrome P450s are haem-thiolate proteins involved in the oxidative degradation of various compounds. They are particularly well known for their role in the degradation of environmental toxins and mutagens. They can be divided into 4 classes, according to the method by which electrons from NAD(P)H are delivered to the catalytic site. Sequence conservation is re…	-	KOG0158, KOG0158, KOG0158, Cytochrome P450 CYP3/CYP5/CYP6/CYP9 subfamilies [Secondary metabolites biosynthesis, transport and catabolism]. 4.79e-21	sp|Q12608|STCB_EMENI Probable sterigmatocystin biosynthesis P450 monooxygenase STCB OS=Emericella nidulans (strain FGSC A4 / ATCC 38163 / CBS 112.46 / NRRL 194 / M139) GN=stcB PE=3 SV=2 6.48e-47	-	KAG4071074.1 hypothetical protein HA402_002746 [Bradysia odoriphaga] 1.79e-36	-
TRINITY_DN13451_c0_g1	0.825215	6.15851	-2.89974	0.000295577	0.00313612	down	-	-	-	-	sp|G3XRG4|LAEA_ASPNA Secondary metabolism regulator laeA OS=Aspergillus niger (strain ATCC 1015 / CBS 113.46 / FGSC A1144 / LSHB Ac4 / NCTC 3858a / NRRL 328 / USDA 3528.7) GN=laeA PE=3 SV=1 2.48e-07	-	-	-
TRINITY_DN11698_c0_g1	0.600151	4.47765	-2.89934	0.00236338	0.0163	down	cd08948, 5beta-POR_like_SDR_a, progesterone 5-beta-reductase-like proteins (5beta-POR), atypical (a) SDRs. 5beta-POR catalyzes the reduction of progesterone to 5beta-pregnane-3,20-dione in Digitalis plants. This subgroup of atypical-extended SDRs, shares the structure of an extended SDR, but has a different glycine-rich nucleotide binding motif (GXXGXXG) and lacks the YXXXK active site motif of c…	-	-	-	sp|O74913|YJ72_SCHPO Uncharacterized protein C757.02c OS=Schizosaccharomyces pombe (strain 972 / ATCC 24843) GN=SPCC757.02c PE=4 SV=1 2.51e-35	-	KAG4074276.1 hypothetical protein HA402_008685 [Bradysia odoriphaga] 8.78e-154	-
TRINITY_DN14156_c0_g1	2.69555	20.1027	-2.89874	0.000531597	0.00506152	down	-	-	-	-	sp|Q9Z2D7|MBD4_MOUSE Methyl-CpG-binding domain protein 4 OS=Mus musculus GN=Mbd4 PE=1 SV=1 2.69e-15	-	NWZ29838.1 MBD4 protein [Asarcornis scutulata] 1.19e-16	-
TRINITY_DN14411_c0_g1	0.951948	7.0844	-2.89569	0.000694855	0.00625961	down	-	-	-	-	-	-	-	-
TRINITY_DN14060_c4_g5	0.621279	4.61928	-2.89435	0.000201258	0.00227534	down	-	pfam14310, Fn3-like, Fibronectin type III-like domain. This domain has a fibronectin type III-like structure. It is often found in association with pfam00933 and pfam01915. Its function is unknown. 6.84e-18	K05349-ko00500 Starch and sucrose metabolism;ko00940 Phenylpropanoid biosynthesis;ko00460 Cyanoamino acid metabolism	-	sp|A2QPK4|BGLD_ASPNC Probable beta-glucosidase D OS=Aspergillus niger (strain CBS 513.88 / FGSC A1513) GN=bglD PE=3 SV=2 0.0	-	CAF3350180.1 unnamed protein product [Rotaria socialis] >CAF4200121.1 unnamed protein product [Rotaria socialis] 1.80e-126	-
TRINITY_DN14252_c0_g6	5.77484	42.8622	-2.89185	2.27358e-07	6.37957e-06	down	-	-	-	KOG4781, KOG4781, KOG4781, Uncharacterized conserved protein [Function unknown]. 6.12e-07	sp|Q566R0|THEM4_RAT Acyl-coenzyme A thioesterase THEM4 OS=Rattus norvegicus GN=Them4 PE=2 SV=1 3.82e-10	-	CAF0745632.1 unnamed protein product [Adineta steineri] >CAF0757696.1 unnamed protein product [Adineta steineri] >CAF0805528.1 unnamed protein product [Adineta steineri] >CAF0865466.1 unnamed protein product [Adineta steineri] >CAF0938467.1 unnamed protein product [Adineta steineri] 3.69e-08	-
TRINITY_DN13893_c0_g1	0.863112	6.40078	-2.89063	4.06024e-05	0.000589152	down	cd02872, GH18_chitolectin_chitotriosidase, This conserved domain family includes a large number of catalytically inactive chitinase-like lectins (chitolectins) including YKL-39, YKL-40 (HCGP39), YM1, oviductin, and AMCase (acidic mammalian chitinase), as well as catalytically active chitotriosidases. The conserved domain is an eight-stranded alpha/beta barrel fold belonging to the family 18 glyco…	pfam00704, Glyco_hydro_18, Glycosyl hydrolases family 18. 1.28e-35	K01183-ko00520 Amino sugar and nucleotide sugar metabolism	KOG2806, KOG2806, KOG2806, Chitinase [Carbohydrate transport and metabolism]. 6.57e-15	sp|P09805|KTXA_KLULA Killer toxin subunits alpha/beta OS=Kluyveromyces lactis (strain ATCC 8585 / CBS 2359 / DSM 70799 / NBRC 1267 / NRRL Y-1140 / WM37) PE=1 SV=1 2.95e-37	-	CAF2685818.1 unnamed protein product [Rotaria sp. Silwood2] >CAF3094001.1 unnamed protein product [Rotaria sp. Silwood2] >CAF4051720.1 unnamed protein product [Rotaria sp. Silwood2] >CAF4166201.1 unnamed protein product [Rotaria sp. Silwood2] 4.12e-97	-
TRINITY_DN9987_c0_g1	5.96301	44.055	-2.88519	4.60552e-06	9.10432e-05	down	cd03332, LMO_FMN, L-Lactate 2-monooxygenase (LMO) FMN-binding domain. LMO is a FMN-containing enzyme that catalyzes the conversion of L-lactate and oxygen to acetate, carbon dioxide, and water. LMO is a member of the family of alpha-hydroxy acid oxidases. It is thought to be a homooctamer with two- and four- fold axes in the center of the octamer. 2.84e-125	pfam01070, FMN_dh, FMN-dependent dehydrogenase. 4.14e-78	K00467-ko00620 Pyruvate metabolism	KOG0538, KOG0538, KOG0538, Glycolate oxidase [Energy production and conversion]. 8.48e-69	sp|Q9HDX2|YKN3_SCHPO Uncharacterized lactate 2-monooxygenase PB1A11.03 OS=Schizosaccharomyces pombe (strain 972 / ATCC 24843) GN=SPAPB1A11.03 PE=3 SV=1 0.0	GO:0003674, molecular_function;GO:0003824, catalytic activity;GO:0004457, lactate dehydrogenase activity;GO:0004460, L-lactate dehydrogenase (cytochrome) activity;GO:0005575, cellular_component;GO:0005622, intracellular;GO:0005623, cell;GO:0005737, cytoplasm;GO:0005739, mitochondrion;GO:0005740, mitochondrial envelope;GO:0005758, mitochondrial intermembrane space;GO:0006082, organic acid metaboli…	XP_034939778.1 hydroxyacid oxidase 1 [Chelonus insularis] >XP_034939785.1 hydroxyacid oxidase 1 [Chelonus insularis] 5.31e-72	-
TRINITY_DN4060_c0_g1	8.18164	60.4209	-2.88458	0.00213595	0.0150365	down	-	pfam07519, Tannase, Tannase and feruloyl esterase. This family includes fungal tannase and feruloyl esterase. It also includes several bacterial homologs of unknown function. 2.23e-51	-	-	sp|P78581|TAN_ASPOR Tannase OS=Aspergillus oryzae (strain ATCC 42149 / RIB 40) GN=AO090103000074 PE=1 SV=1 5.44e-136	-	XP_020807431.1 uncharacterized protein LOC110183487 [Drosophila serrata] >XP_020814795.1 uncharacterized protein LOC110189169 [Drosophila serrata] 9.55e-21	-
TRINITY_DN9181_c0_g1	1.52068	11.213	-2.88239	0.00080384	0.00703693	down	-	-	-	-	-	-	XP_037033187.1 taurine hydroxylase-like protein SAT17 [Bradysia coprophila] 1.80e-186	-
TRINITY_DN10951_c0_g1	5.54071	40.815	-2.88096	7.15449e-05	0.000952258	down	-	pfam02661, Fic, Fic/DOC family. This family consists of the Fic (filamentation induced by cAMP) protein and doc (death on curing). The Fic protein is involved in cell division and is suggested to be involved in the synthesis of PAB or folate, indicating that the Fic protein and cAMP are involved in a regulatory mechanism of cell division via folate metabolism. This family contains a central conse…	-	KOG3824, KOG3824, KOG3824, Huntingtin interacting protein HYPE [General function prediction only]. 1.52e-06	sp|Q54RJ6|Y5363_DICDI Fido domain-containing protein DDB_G0283145 OS=Dictyostelium discoideum GN=DDB_G0283145 PE=3 SV=2 5.06e-11	-	XP_022901251.1 adenosine monophosphate-protein transferase FICD homolog [Onthophagus taurus] 1.82e-06	-
TRINITY_DN9794_c0_g1	12.597	92.2985	-2.87322	9.13965e-08	2.84741e-06	down	-	pfam00185, OTCace, Aspartate/ornithine carbamoyltransferase, Asp/Orn binding domain. 4.70e-36	K00611-ko01230 Biosynthesis of amino acids;ko00220 Arginine biosynthesis	KOG1504, KOG1504, KOG1504, Ornithine carbamoyltransferase OTC/ARG3 [Amino acid transport and metabolism]. 1.85e-102	sp|P11803|OTC_EMENI Ornithine carbamoyltransferase, mitochondrial OS=Emericella nidulans (strain FGSC A4 / ATCC 38163 / CBS 112.46 / NRRL 194 / M139) GN=argB PE=2 SV=1 1.06e-165	GO:0000050, urea cycle;GO:0003674, molecular_function;GO:0003824, catalytic activity;GO:0004585, ornithine carbamoyltransferase activity;GO:0005575, cellular_component;GO:0005622, intracellular;GO:0005623, cell;GO:0005737, cytoplasm;GO:0005739, mitochondrion;GO:0005759, mitochondrial matrix;GO:0005829, cytosol;GO:0006082, organic acid metabolic process;GO:0006520, cellular amino acid metabolic pr…	XP_043853539.1 ornithine transcarbamylase, mitochondrial [Dromiciops gliroides] 2.00e-89	-
TRINITY_DN10421_c0_g2	2.2989	16.8227	-2.8714	8.15061e-07	2.01954e-05	down	-	pfam09995, DUF2236, Uncharacterized protein conserved in bacteria (DUF2236). This domain, found in various hypothetical bacterial proteins, has no known function. This family contains a highly conserved arginine and histidine that may be active site residues for an as yet unknown catalytic activity. 8.85e-29	-	-	sp|P64958|Y2261_MYCBO Uncharacterized protein Mb2261 OS=Mycobacterium bovis (strain ATCC BAA-935 / AF2122/97) GN=Mb2261 PE=4 SV=1 5.82e-24	-	-	-
TRINITY_DN8886_c0_g1	5.89534	43.1366	-2.87127	2.3771e-07	6.62616e-06	down	sd00045, ANK, ankyrin repeats. Ankyrin repeats are one of the most abundant repeat motifs, and generally function as scaffolds for protein-protein interactions in processes including cell cycle, transcriptional regulation, signal transduction, vesicular trafficking, and inflammatory response. Although predominantly found in eukaryotic proteins, they are also found in some bacterial and viral prot…	pfam12796, Ank_2, Ankyrin repeats (3 copies). 5.36e-07	-	KOG4177, KOG4177, KOG4177, Ankyrin [Cell wall/membrane/envelope biogenesis]. 7.41e-20	sp|Q8NFD2|ANKK1_HUMAN Ankyrin repeat and protein kinase domain-containing protein 1 OS=Homo sapiens GN=ANKK1 PE=2 SV=1 3.92e-13	-	PSN51182.1 hypothetical protein C0J52_06044 [Blattella germanica] 1.13e-07	-
TRINITY_DN10296_c0_g2	0.58221	4.25889	-2.87086	0.00171899	0.0128077	down	-	-	-	-	-	-	-	-
TRINITY_DN5647_c0_g1	2.7538	20.1373	-2.87037	9.96949e-05	0.00125468	down	-	pfam01753, zf-MYND, MYND finger. 2.44e-07	-	-	-	-	KAG4068301.1 hypothetical protein HA402_007821 [Bradysia odoriphaga] 1.42e-43	-
TRINITY_DN7047_c0_g1	0.494823	3.60788	-2.86617	0.000536164	0.00510118	down	-	-	-	-	-	-	-	-
TRINITY_DN14294_c2_g10	1.16216	8.45584	-2.86314	1.8613e-05	0.000306862	down	-	-	-	-	-	-	CAF1229175.1 unnamed protein product [Adineta steineri] >CAF1361997.1 unnamed protein product [Adineta steineri] 1.08e-29	-
TRINITY_DN13265_c0_g1	6.14973	44.503	-2.85531	8.71175e-08	2.74097e-06	down	cd01359, Argininosuccinate_lyase, Argininosuccinate lyase (argininosuccinase, ASAL). This group contains ASAL and related proteins. It is a member of the Lyase class I family. Members of this family for the most part catalyze similar beta-elimination reactions in which a C-N or C-O bond is cleaved with the release of fumarate as one of the products. These proteins are active as tetramers. The fou…	pfam00206, Lyase_1, Lyase. 4.06e-35	K01755-ko01230 Biosynthesis of amino acids;ko00250 Alanine, aspartate and glutamate metabolism;ko00220 Arginine biosynthesis	KOG1316, KOG1316, KOG1316, Argininosuccinate lyase [Amino acid transport and metabolism]. 0.0	sp|P50514|ARLZ_SCHPO Probable argininosuccinate lyase OS=Schizosaccharomyces pombe (strain 972 / ATCC 24843) GN=argx PE=3 SV=1 0.0	-	XP_021364765.1 argininosuccinate lyase-like [Mizuhopecten yessoensis] >XP_021364766.1 argininosuccinate lyase-like [Mizuhopecten yessoensis] >OWF44901.1 Argininosuccinate lyase [Mizuhopecten yessoensis] 1.89e-167	-
TRINITY_DN12231_c0_g1	78.5748	566.527	-2.85001	0.000262279	0.00283008	down	cd05347, Ga5DH-like_SDR_c, gluconate 5-dehydrogenase (Ga5DH)-like, classical (c) SDRs. Ga5DH catalyzes the NADP-dependent conversion of carbon source D-gluconate and 5-keto-D-gluconate. This SDR subgroup has a classical Gly-rich NAD(P)-binding motif and a conserved active site tetrad pattern. However, it has been proposed that Arg104 (Streptococcus suis Ga5DH numbering), as well as an active site…	pfam13561, adh_short_C2, Enoyl-(Acyl carrier protein) reductase. 7.58e-15	K00065-ko00040 Pentose and glucuronate interconversions	KOG1200, KOG1200, KOG1200, Mitochondrial/plastidial beta-ketoacyl-ACP reductase [Lipid transport and metabolism]. 1.80e-19	sp|P50842|KDUD_BACSU 2-dehydro-3-deoxy-D-gluconate 5-dehydrogenase OS=Bacillus subtilis (strain 168) GN=kduD PE=2 SV=1 9.75e-43	-	MCL4136959.1 hypothetical protein [Idotea baltica] 2.37e-46	-
TRINITY_DN4386_c0_g1	0.790887	5.67109	-2.84208	0.00083021	0.00721806	down	-	pfam00933, Glyco_hydro_3, Glycosyl hydrolase family 3 N terminal domain. 5.94e-12	K05349-ko00500 Starch and sucrose metabolism;ko00940 Phenylpropanoid biosynthesis;ko00460 Cyanoamino acid metabolism	-	sp|A2QPK4|BGLD_ASPNC Probable beta-glucosidase D OS=Aspergillus niger (strain CBS 513.88 / FGSC A1513) GN=bglD PE=3 SV=2 3.17e-132	-	CAF1521792.1 unnamed protein product [Didymodactylos carnosus] >CAF4380928.1 unnamed protein product [Didymodactylos carnosus] 1.27e-51	-
TRINITY_DN12450_c0_g1	4.69344	33.5975	-2.83964	7.0796e-05	0.000944268	down	-	pfam13489, Methyltransf_23, Methyltransferase domain. This family appears to be a methyltransferase domain. 3.35e-07	-	-	sp|A7XRZ1|TDIE_EMENI Probable methyltransferase tdiE OS=Emericella nidulans (strain FGSC A4 / ATCC 38163 / CBS 112.46 / NRRL 194 / M139) GN=tdiE PE=2 SV=1 1.78e-49	-	XP_039274961.1 LOW QUALITY PROTEIN: methyltransferase pytC-like [Nilaparvata lugens] 7.81e-38	-
TRINITY_DN13711_c0_g1	1.92595	13.7431	-2.83507	5.4991e-06	0.000106068	down	-	pfam07859, Abhydrolase_3, alpha/beta hydrolase fold. This catalytic domain is found in a very wide range of enzymes. 1.24e-11	-	KOG1515, KOG1515, KOG1515, Arylacetamide deacetylase [Defense mechanisms]. 1.56e-11	sp|Q5UQ83|YR526_MIMIV Putative alpha/beta hydrolase R526 OS=Acanthamoeba polyphaga mimivirus GN=MIMI_R526 PE=1 SV=1 5.68e-07	-	XP_046542897.1 arylacetamide deacetylase-like [Haliotis rubra] 9.10e-17	-
TRINITY_DN20846_c0_g1	2.14543	15.2884	-2.8331	2.23224e-05	0.000355118	down	-	pfam02567, PhzC-PhzF, Phenazine biosynthesis-like protein. PhzC/PhzF is involved in dimerization of two 2,3-dihydro-3-oxo-anthranilic acid molecules to create PCA by P. fluorescens. This family also contains uncharacterized Mycobacterial proteins, though there is no significant sequence similarity to pfam00303 members. This family appears to be distantly related to pfam01678, including containing…	-	KOG3033, KOG3033, KOG3033, Predicted PhzC/PhzF-type epimerase [General function prediction only]. 1.01e-06	sp|P73125|Y1019_SYNY3 Uncharacterized isomerase slr1019 OS=Synechocystis sp. (strain PCC 6803 / Kazusa) GN=slr1019 PE=3 SV=2 2.23e-14	-	KAF4516325.1 hypothetical protein B566_EDAN000566 [Ephemera danica] 2.63e-15	-
TRINITY_DN20789_c0_g1	4.23253	30.0842	-2.82941	0.00141571	0.0110197	down	-	-	-	-	-	-	KMQ88347.1 n- gnat protein [Lasius niger] 2.06e-25	-
TRINITY_DN10027_c0_g1	0.815854	5.79742	-2.82903	0.00323717	0.0207398	down	-	pfam12898, Stc1, Stc1 domain. The domain contains 8 conserved cysteines that may bind to zinc. In S. pombe this protein acts as a protein linker which links the chromatin modifying CLRC complex to RNAi by tethering it to the RITS complex. The region is reported as a LIM domain here, but has a slightly different arrangement of its CxxC pairs from the Pfam LIM domain pfam00412, hence why it is not …	-	-	-	-	-	-
TRINITY_DN14715_c0_g1	6.64387	47.1942	-2.82852	3.41511e-05	0.000511904	down	-	-	-	-	-	-	-	-
TRINITY_DN9238_c0_g1	8.748	61.5518	-2.81478	0.00363183	0.0226517	down	cd13854, CuRO_1_MaLCC_like, The first cupredoxin domain of the fungal laccases similar to Ma-LCC from Melanocarpus albomyces. The subfamily of fungal laccases includes Ma-LCC and similar proteins. Ma-LCC is a multicopper oxidase (MCO) from Melanocarpus albomyces. Its crystal structure contains all four coppers at the mono- and trinuclear copper centers. Laccase is a blue multi-copper enzyme that …	pfam07732, Cu-oxidase_3, Multicopper oxidase. This entry contains many divergent copper oxidase-like domains that are not recognized by the pfam00394 model. 7.26e-24	-	KOG1263, KOG1263, KOG1263, Multicopper oxidases [Secondary metabolites biosynthesis, transport and catabolism]. 2.09e-43	sp|Q96WM9|LAC2_BOTFU Laccase-2 OS=Botryotinia fuckeliana GN=lcc2 PE=2 SV=1 7.36e-105	GO:0008150, biological_process;GO:0008152, metabolic process;GO:0009058, biosynthetic process;GO:0019748, secondary metabolic process;GO:0044550, secondary metabolite biosynthetic process	KAJ3024466.1 hypothetical protein HDU68_008138 [Siphonaria sp. JEL0065] 1.54e-52	-
TRINITY_DN10354_c0_g1	2.27248	15.9814	-2.81405	0.00239809	0.0164876	down	-	-	-	-	-	-	-	-
TRINITY_DN14114_c1_g5	1.42562	10.0138	-2.81233	0.0102689	0.049934	down	-	-	-	-	-	-	-	-
TRINITY_DN11054_c0_g1	59.2393	416.056	-2.81215	0.00071422	0.00640371	down	-	-	-	-	-	-	-	-
TRINITY_DN1103_c0_g1	1.88743	13.2491	-2.81141	1.0675e-05	0.000191112	down	-	pfam00150, Cellulase, Cellulase (glycosyl hydrolase family 5). 2.09e-09	-	-	sp|A3DJ77|GUNC_CLOTH Endoglucanase C OS=Clostridium thermocellum (strain ATCC 27405 / DSM 1237 / NBRC 103400 / NCIMB 10682 / NRRL B-4536 / VPI 7372) GN=celC PE=3 SV=1 5.49e-22	-	EFX85489.1 exoglucanase-1,3-beta-glucanase [Daphnia pulex] 1.98e-17	-
TRINITY_DN14770_c0_g1	0.363813	2.54256	-2.80501	0.00526261	0.0301324	down	-	pfam12831, FAD_oxidored, FAD dependent oxidoreductase. This family of proteins contains FAD dependent oxidoreductases and related proteins. 4.80e-22	-	-	-	-	CAD7634727.1 unnamed protein product, partial [Medioppia subpectinata] >CAG2115157.1 unnamed protein product, partial [Medioppia subpectinata] 1.15e-90	-
TRINITY_DN8276_c0_g1	1.12849	7.87919	-2.80365	0.00436111	0.0261112	down	-	-	-	-	-	-	-	-
TRINITY_DN14023_c0_g2	7.89319	54.9739	-2.80007	3.75127e-06	7.64142e-05	down	cd17371, MFS_MucK, Cis,cis-muconate transport protein and similar proteins of the Major Facilitator Superfamily. This subfamily is composed of Acinetobacter sp. Cis,cis-muconate transport protein (MucK), Escherichia coli putative sialic acid transporter 1, and similar proteins. MucK functions in the uptake of muconate and allows Acinetobacter calcoaceticus ADP1 (BD413) to grow on exogenous cis,ci…	pfam00083, Sugar_tr, Sugar (and other) transporter. 1.76e-07	-	KOG0253, KOG0253, KOG0253, Synaptic vesicle transporter SV2 (major facilitator superfamily) [General function prediction only]. 4.06e-07	sp|P36035|JEN1_YEAST Carboxylic acid transporter protein homolog OS=Saccharomyces cerevisiae (strain ATCC 204508 / S288c) GN=JEN1 PE=1 SV=1 3.92e-86	GO:0000322, storage vacuole;GO:0000323, lytic vacuole;GO:0000324, fungal-type vacuole;GO:0003674, molecular_function;GO:0005215, transporter activity;GO:0005342, organic acid transmembrane transporter activity;GO:0005575, cellular_component;GO:0005622, intracellular;GO:0005623, cell;GO:0005737, cytoplasm;GO:0005739, mitochondrion;GO:0005773, vacuole;GO:0005886, plasma membrane;GO:0006810, transpo…	CAF1392163.1 unnamed protein product [Adineta steineri] >CAF1611485.1 unnamed protein product [Adineta steineri] 7.47e-169	-
TRINITY_DN7222_c0_g1	6.08563	42.3684	-2.79951	6.47711e-05	0.000875858	down	-	-	-	-	-	-	-	-
TRINITY_DN6702_c0_g1	0.488204	3.39819	-2.79921	0.00457605	0.0270919	down	-	-	-	-	-	-	UJR07391.1 hypothetical protein I4U23_011677 [Adineta vaga] 8.63e-22	-
TRINITY_DN12237_c0_g1	63.5478	441.875	-2.79772	0.00101365	0.00836297	down	-	-	-	-	-	GO:0000278, mitotic cell cycle;GO:0000281, mitotic cytokinesis;GO:0000910, cytokinesis;GO:0003674, molecular_function;GO:0005488, binding;GO:0007049, cell cycle;GO:0007275, multicellular organism development;GO:0008061, chitin binding;GO:0008144, drug binding;GO:0008150, biological_process;GO:0009790, embryo development;GO:0009792, embryo development ending in birth or egg hatching;GO:0009987, ce…	-	-
TRINITY_DN7402_c0_g1	9.09157	63.2164	-2.7977	8.98208e-08	2.80519e-06	down	cd11062, CYP58-like, cytochrome P450 family 58-like fungal cytochrome P450s. This group includes Fusarium sporotrichioides cytochrome P450 58 (CYP58, also known as Tri4 and trichodiene oxygenase), and similar fungal proteins. CYP58 catalyzes the oxygenation of trichodiene during the biosynthesis of trichothecenes, which are sesquiterpenoid toxins that act by inhibiting protein biosynthesis. The C…	pfam00067, p450, Cytochrome P450. Cytochrome P450s are haem-thiolate proteins involved in the oxidative degradation of various compounds. They are particularly well known for their role in the degradation of environmental toxins and mutagens. They can be divided into 4 classes, according to the method by which electrons from NAD(P)H are delivered to the catalytic site. Sequence conservation is re…	-	KOG0684, KOG0684, KOG0684, Cytochrome P450 [Secondary metabolites biosynthesis, transport and catabolism]. 2.39e-11	sp|Q12612|TRI4_FUSSP Trichodiene oxygenase OS=Fusarium sporotrichioides GN=TRI4 PE=3 SV=1 1.03e-75	-	XP_022791671.1 cytochrome P450 3A30-like [Stylophora pistillata] 2.52e-21	-
TRINITY_DN277_c0_g1	5.86003	40.681	-2.79537	0.00190373	0.0137569	down	-	-	-	-	-	-	-	-
TRINITY_DN3530_c0_g1	0.86118	5.97786	-2.79524	0.00429978	0.025817	down	-	-	-	-	-	-	-	-
TRINITY_DN14166_c2_g4	1.83933	12.728	-2.79075	0.00203472	0.0144569	down	-	-	-	-	-	-	-	-
TRINITY_DN9966_c0_g1	12.2139	84.4782	-2.79005	1.96263e-07	5.6187e-06	down	-	pfam03328, HpcH_HpaI, HpcH/HpaI aldolase/citrate lyase family. This family includes 2,4-dihydroxyhept-2-ene-1,7-dioic acid aldolase and 4-hydroxy-2-oxovalerate aldolase. 2.41e-09	K02510-ko00350 Tyrosine metabolism	-	sp|B1LLJ9|RHMA_ECOSM 2-keto-3-deoxy-L-rhamnonate aldolase OS=Escherichia coli (strain SMS-3-5 / SECEC) GN=rhmA PE=3 SV=1 2.14e-21	-	MCL4122431.1 hypothetical protein [Idotea baltica] 2.09e-18	-
TRINITY_DN6985_c0_g1	0.384916	2.66074	-2.78921	0.00022967	0.00253635	down	cd02112, eukary_NR_Moco, molybdopterin binding domain of eukaryotic nitrate reductase (NR). Assimilatory NRs catalyze the reduction of nitrate to nitrite which is subsequently converted to NH4+ by nitrite reductase. Eukaryotic assimilatory nitrate reductases are cytosolic homodimeric enzymes with three prosthetic groups, flavin adenine dinucleotide (FAD), cytochrome b557, and Mo cofactor, which a…	pfam03404, Mo-co_dimer, Mo-co oxidoreductase dimerization domain. This domain is found in molybdopterin cofactor (Mo-co) oxidoreductases. It is involved in dimer formation, and has an Ig-fold structure. 3.64e-57	K10534-ko00910 Nitrogen metabolism	KOG0535, KOG0535, KOG0535, Sulfite oxidase, molybdopterin-binding component [Energy production and conversion]. 1.82e-76	sp|P43100|NIA_BEABA Nitrate reductase [NADPH] OS=Beauveria bassiana GN=NIA PE=3 SV=1 0.0	GO:0003674, molecular_function;GO:0003824, catalytic activity;GO:0006807, nitrogen compound metabolic process;GO:0008150, biological_process;GO:0008152, metabolic process;GO:0008940, nitrate reductase activity;GO:0016491, oxidoreductase activity;GO:0016661, oxidoreductase activity, acting on other nitrogenous compounds as donors;GO:0046857, oxidoreductase activity, acting on other nitrogenous com…	CAF1013340.1 unnamed protein product [Adineta steineri] >CAF3850773.1 unnamed protein product [Adineta steineri] 2.13e-289	-
TRINITY_DN11675_c0_g1	2.99113	20.658	-2.78794	3.87136e-06	7.82335e-05	down	-	pfam02515, CoA_transf_3, CoA-transferase family III. CoA-transferases are found in organisms from all lines of descent. Most of these enzymes belong to two well-known enzyme families, but recent work on unusual biochemical pathways of anaerobic bacteria has revealed the existence of a third family of CoA-transferases. The members of this enzyme family differ in sequence and reaction mechanism fro…	-	KOG3957, KOG3957, KOG3957, Predicted L-carnitine dehydratase/alpha-methylacyl-CoA racemase [Lipid transport and metabolism]. 2.26e-13	sp|Q1KLK0|SMTB_CHLAU Succinyl-CoA--L-malate CoA-transferase beta subunit OS=Chloroflexus aurantiacus GN=smtB PE=1 SV=1 4.20e-15	-	CAF1124181.1 unnamed protein product [Didymodactylos carnosus] >CAF3900415.1 unnamed protein product [Didymodactylos carnosus] 2.18e-148	-
TRINITY_DN25964_c0_g1	0.681551	4.70595	-2.78759	0.00333219	0.0211777	down	-	-	-	-	sp|P9WM51|Y1260_MYCTU Uncharacterized protein Rv1260 OS=Mycobacterium tuberculosis (strain ATCC 25618 / H37Rv) GN=Rv1260 PE=1 SV=1 1.04e-44	-	UJR18478.1 hypothetical protein I4U23_005384 [Adineta vaga] 2.91e-190	-
TRINITY_DN13741_c3_g14	8.29746	57.2792	-2.78727	0.000857932	0.00735798	down	cd17350, MFS_PTR2, Peptide transporter PTR2 of the Major Facilitator Superfamily of transporters. Fungal peptide transporter or permease PTR2 is a member of the proton-coupled oligopeptide transporter (POT) family of integral membrane proteins that mediate the cellular uptake of di/tripeptides and peptide-like drugs. It is a 12-transmembrane domain (TMD) integral membrane protein that translocate…	pfam00854, PTR2, POT family. The POT (proton-dependent oligopeptide transport) family all appear to be proton dependent transporters. 9.72e-06	-	-	sp|P46030|PTR2_CANAX Peptide transporter PTR2 OS=Candida albicans GN=PTR2 PE=3 SV=1 1.38e-87	-	CAF0874988.1 unnamed protein product [Didymodactylos carnosus] >CAF1139760.1 unnamed protein product [Didymodactylos carnosus] >CAF3661925.1 unnamed protein product [Didymodactylos carnosus] >CAF3932902.1 unnamed protein product [Didymodactylos carnosus] 3.13e-75	-
TRINITY_DN23157_c0_g1	3.87415	26.6402	-2.78165	6.47198e-05	0.000875858	down	cd17323, MFS_Tpo1_MDR_like, Yeast Polyamine transporter 1 (Tpo1) and similar multidrug resistance (MDR) transporters of the Major Facilitator Superfamily. This family is composed of fungal multidrug resistance (MDR) transporters including several proteins from Saccharomyces cerevisiae such as polyamine transporters 1-4 (Tpo1-4), quinidine resistance proteins 1-3 (Qdr1-3), dityrosine transporter 1…	-	-	KOG0255, KOG0255, KOG0255, Synaptic vesicle transporter SVOP and related transporters (major facilitator superfamily) [General function prediction only]. 3.80e-07	sp|O94343|YHMA_SCHPO Uncharacterized MFS-type transporter C1271.10c OS=Schizosaccharomyces pombe (strain 972 / ATCC 24843) GN=SPBC1271.10c PE=1 SV=1 1.88e-38	-	CAF1467121.1 unnamed protein product [Adineta steineri] 2.32e-14	-
TRINITY_DN6422_c0_g1	0.737372	5.06457	-2.77998	0.000622715	0.00576919	down	-	-	-	-	-	-	-	-
TRINITY_DN13003_c0_g1	85.0614	583.742	-2.77875	2.58789e-05	0.000405606	down	-	-	-	-	-	-	-	-
TRINITY_DN14669_c0_g1	0.900822	6.14863	-2.77095	0.0090699	0.0454667	down	-	-	-	-	-	-	-	-
TRINITY_DN14230_c2_g1	2.34961	16.0371	-2.77092	4.3637e-05	0.000629065	down	-	-	-	-	-	-	-	-
TRINITY_DN8716_c0_g1	256.909	1741.83	-2.76127	0.00065636	0.00601836	down	-	-	-	-	-	-	-	-
TRINITY_DN23984_c0_g1	1.38196	9.36392	-2.7604	0.000248893	0.00271096	down	-	-	-	-	-	-	-	-
TRINITY_DN12222_c0_g1	1.883	12.7576	-2.76025	3.60614e-05	0.000534862	down	-	-	K05528-ko00513 Various types of N-glycan biosynthesis	-	sp|Q9UTR6|OCH1_SCHPO Initiation-specific alpha-1,6-mannosyltransferase OS=Schizosaccharomyces pombe (strain 972 / ATCC 24843) GN=och1 PE=1 SV=2 4.29e-36	-	CAF0748756.1 unnamed protein product [Adineta steineri] >CAF3958936.1 unnamed protein product [Adineta steineri] 4.69e-31	-
TRINITY_DN6343_c0_g1	16.0173	108.21	-2.75612	2.86514e-07	7.84887e-06	down	cd03232, ABCG_PDR_domain2, Second domain of the pleiotropic drug resistance-like (PDR) subfamily G of ATP-binding cassette transporters. The pleiotropic drug resistance (PDR) is a well-described phenomenon occurring in fungi and shares several similarities with processes in bacteria and higher eukaryotes. This PDR subfamily represents domain I of its (ABC-IM)2 organization. ABC transporters are a…	pfam01061, ABC2_membrane, ABC-2 type transporter. 1.43e-10	-	KOG0065, KOG0065, KOG0065, Pleiotropic drug resistance proteins (PDR1-15), ABC superfamily [Secondary metabolites biosynthesis, transport and catabolism]. 3.40e-39	sp|P41820|BFR1_SCHPO Brefeldin A resistance protein OS=Schizosaccharomyces pombe (strain 972 / ATCC 24843) GN=bfr1 PE=1 SV=1 0.0	-	KAJ3009872.1 hypothetical protein HDU68_002453, partial [Siphonaria sp. JEL0065] 1.25e-195	-
TRINITY_DN8450_c0_g1	1.97316	13.2926	-2.75204	0.000201381	0.00227534	down	cd00312, Esterase_lipase, Esterases and lipases (includes fungal lipases, cholinesterases, etc.) These enzymes act on carboxylic esters (EC: 3.1.1.-). The catalytic apparatus involves three residues (catalytic triad): a serine, a glutamate or aspartate and a histidine.These catalytic residues are responsible for the nucleophilic attack on the carbonyl carbon atom of the ester bond. In contrast wi…	pfam00135, COesterase, Carboxylesterase family. 4.28e-36	K03927-ko00983 Drug metabolism - other enzymes	KOG4389, KOG4389, KOG4389, Acetylcholinesterase/Butyrylcholinesterase [Signal transduction mechanisms]. 1.80e-37	sp|D2D3B6|FUMD_SPHMC Fumonisin B1 esterase OS=Sphingopyxis macrogoltabida GN=fumD PE=1 SV=1 3.39e-49	-	CAD2180049.1 unnamed protein product [Meloidogyne enterolobii] 2.86e-73	-
TRINITY_DN9246_c0_g1	1.13702	7.6486	-2.74994	0.00395968	0.0241978	down	-	-	-	-	-	-	XP_019864511.1 PREDICTED: uncharacterized protein LOC105316674 [Amphimedon queenslandica] 4.18e-90	-
TRINITY_DN6767_c0_g1	0.422577	2.84177	-2.7495	0.00658717	0.0355993	down	cd08948, 5beta-POR_like_SDR_a, progesterone 5-beta-reductase-like proteins (5beta-POR), atypical (a) SDRs. 5beta-POR catalyzes the reduction of progesterone to 5beta-pregnane-3,20-dione in Digitalis plants. This subgroup of atypical-extended SDRs, shares the structure of an extended SDR, but has a different glycine-rich nucleotide binding motif (GXXGXXG) and lacks the YXXXK active site motif of c…	-	-	-	sp|Q9STX2|VEP1_ARATH 3-oxo-Delta(4,5)-steroid 5-beta-reductase OS=Arabidopsis thaliana GN=VEP1 PE=1 SV=1 5.25e-11	-	-	-
TRINITY_DN14400_c0_g1	0.45697	3.07202	-2.74902	0.00953998	0.0471656	down	-	-	-	-	-	-	-	-
TRINITY_DN14289_c0_g4	2.38478	16.0149	-2.74749	1.88092e-05	0.000309695	down	-	-	-	-	-	-	-	-
TRINITY_DN7069_c0_g1	7.93481	53.2799	-2.74732	9.52969e-07	2.3161e-05	down	cd02648, nuc_hydro_1, NH_1: A subgroup of nucleoside hydrolases. This group contains fungal proteins similar to nucleoside hydrolases. Nucleoside hydrolases cleave the N-glycosidic bond in nucleosides generating ribose and the respective base. These enzymes vary in their substrate specificity. . 5.85e-65	pfam01156, IU_nuc_hydro, Inosine-uridine preferring nucleoside hydrolase. 3.31e-21	-	KOG2938, KOG2938, KOG2938, Predicted inosine-uridine preferring nucleoside hydrolase [Nucleotide transport and metabolism]. 1.72e-06	sp|Q9P6J4|YHD6_SCHPO Uncharacterized protein C1683.06c OS=Schizosaccharomyces pombe (strain 972 / ATCC 24843) GN=SPBC1683.06c PE=3 SV=1 1.54e-16	GO:0003674, molecular_function;GO:0003824, catalytic activity;GO:0006139, nucleobase-containing compound metabolic process;GO:0006152, purine nucleoside catabolic process;GO:0006213, pyrimidine nucleoside metabolic process;GO:0006725, cellular aromatic compound metabolic process;GO:0006732, coenzyme metabolic process;GO:0006733, oxidoreduction coenzyme metabolic process;GO:0006753, nucleoside pho…	MCL4107561.1 hypothetical protein [Idotea baltica] 1.65e-13	-
TRINITY_DN13005_c0_g1	112.71	756.456	-2.74664	0.000566775	0.0053365	down	-	-	-	-	-	-	-	-
TRINITY_DN14035_c2_g1	48.9378	328.442	-2.74662	0.00442761	0.0264222	down	cd13880, CuRO_2_MaLCC_like, The second cupredoxin domain of the fungal laccases similar to Ma-LCC from Melanocarpus albomyces. The subfamily of fungal laccases includes Ma-LCC and similar proteins. Ma-LCC is a multicopper oxidase (MCO) from Melanocarpus albomyces. Its crystal structure contains all four coppers at the mono- and trinuclear copper centers. Laccase is a blue multi-copper enzyme that…	pfam00394, Cu-oxidase, Multicopper oxidase. Many of the proteins in this family contain multiple similar copies of this plastocyanin-like domain. 3.70e-28	-	KOG1263, KOG1263, KOG1263, Multicopper oxidases [Secondary metabolites biosynthesis, transport and catabolism]. 2.25e-12	sp|Q96WM9|LAC2_BOTFU Laccase-2 OS=Botryotinia fuckeliana GN=lcc2 PE=2 SV=1 2.01e-39	-	CAF1050223.1 unnamed protein product [Didymodactylos carnosus] >CAF1464025.1 unnamed protein product [Didymodactylos carnosus] >CAF3817046.1 unnamed protein product [Didymodactylos carnosus] >CAF4333570.1 unnamed protein product [Didymodactylos carnosus] 4.37e-42	-
TRINITY_DN7066_c0_g1	0.427808	2.86858	-2.7453	0.0042932	0.0257897	down	cd17323, MFS_Tpo1_MDR_like, Yeast Polyamine transporter 1 (Tpo1) and similar multidrug resistance (MDR) transporters of the Major Facilitator Superfamily. This family is composed of fungal multidrug resistance (MDR) transporters including several proteins from Saccharomyces cerevisiae such as polyamine transporters 1-4 (Tpo1-4), quinidine resistance proteins 1-3 (Qdr1-3), dityrosine transporter 1…	-	-	KOG0255, KOG0255, KOG0255, Synaptic vesicle transporter SVOP and related transporters (major facilitator superfamily) [General function prediction only]. 3.20e-20	sp|D7PHY8|VRTL_PENAE Efflux pump vrtL OS=Penicillium aethiopicum GN=vrtL PE=1 SV=1 5.89e-65	GO:0000041, transition metal ion transport;GO:0003674, molecular_function;GO:0005215, transporter activity;GO:0005375, copper ion transmembrane transporter activity;GO:0005575, cellular_component;GO:0005623, cell;GO:0005628, prospore membrane;GO:0006810, transport;GO:0006811, ion transport;GO:0006812, cation transport;GO:0006825, copper ion transport;GO:0008150, biological_process;GO:0008324, cat…	CAF1212513.1 unnamed protein product [Adineta steineri] >CAF1494558.1 unnamed protein product [Adineta steineri] 3.45e-70	-
TRINITY_DN12584_c0_g1	0.779156	5.22363	-2.74507	1.43058e-05	0.000245068	down	cd05235, SDR_e1, extended (e) SDRs, subgroup 1. This family consists of an SDR module of multidomain proteins identified as putative polyketide sythases fatty acid synthases (FAS), and nonribosomal peptide synthases, among others. However, unlike the usual ketoreductase modules of FAS and polyketide synthase, these domains are related to the extended SDRs, and have canonical NAD(P)-binding motifs…	pfam07993, NAD_binding_4, Male sterility protein. This family represents the C-terminal region of the male sterility protein in a number of arabidopsis and drosophila. A sequence-related jojoba acyl CoA reductase is also included. 1.02e-10	-	KOG1221, KOG1221, KOG1221, Acyl-CoA reductase [Lipid transport and metabolism]. 1.93e-08	sp|A0A0K0MCJ4|CAZM_CHAGB Iterative polyketide synthase CazM OS=Chaetomium globosum (strain ATCC 6205 / CBS 148.51 / DSM 1962 / NBRC 6347 / NRRL 1970) GN=cazM PE=1 SV=1 3.99e-25	-	CAF1227365.1 unnamed protein product [Adineta steineri] >CAF1517826.1 unnamed protein product [Adineta steineri] 6.21e-53	-
TRINITY_DN13789_c0_g3	4.49835	30.1147	-2.743	4.99304e-05	0.000705968	down	cd17323, MFS_Tpo1_MDR_like, Yeast Polyamine transporter 1 (Tpo1) and similar multidrug resistance (MDR) transporters of the Major Facilitator Superfamily. This family is composed of fungal multidrug resistance (MDR) transporters including several proteins from Saccharomyces cerevisiae such as polyamine transporters 1-4 (Tpo1-4), quinidine resistance proteins 1-3 (Qdr1-3), dityrosine transporter 1…	-	-	KOG0255, KOG0255, KOG0255, Synaptic vesicle transporter SVOP and related transporters (major facilitator superfamily) [General function prediction only]. 7.66e-11	sp|O59699|YN42_SCHPO Uncharacterized transporter C36.02c OS=Schizosaccharomyces pombe (strain 972 / ATCC 24843) GN=SPBC36.02c PE=3 SV=1 3.89e-59	-	CAF1049368.1 unnamed protein product [Adineta steineri] >CAF1141909.1 unnamed protein product [Adineta steineri] 4.09e-56	-
TRINITY_DN6007_c0_g1	1.05971	7.09104	-2.74233	0.000947311	0.00792189	down	cd17327, MFS_FEN2_like, Pantothenate transporter FEN2 and similar transporters of the Major Facilitator Superfamily. This family is composed of Saccharomyces cerevisiae pantothenate transporter FEN2 (or fenpropimorph resistance protein 2) and similar proteins from fungi and bacteria including fungal vitamin H transporter, allantoate permease, and high-affinity nicotinic acid transporter, as well …	-	-	KOG2533, KOG2533, KOG2533, Permease of the major facilitator superfamily [Carbohydrate transport and metabolism]. 1.33e-17	sp|B5BP49|YP55_SCHPO Uncharacterized transporter C460.05 OS=Schizosaccharomyces pombe (strain 972 / ATCC 24843) GN=SPBC460.05 PE=3 SV=1 7.18e-41	-	CAF1391452.1 unnamed protein product [Adineta ricciae] 3.70e-10	-
TRINITY_DN8457_c0_g1	1.19504	7.99225	-2.74155	0.00314001	0.0202808	down	-	-	-	-	-	-	-	-
TRINITY_DN11956_c0_g1	0.604528	4.03997	-2.74046	0.000146835	0.00174645	down	cd03232, ABCG_PDR_domain2, Second domain of the pleiotropic drug resistance-like (PDR) subfamily G of ATP-binding cassette transporters. The pleiotropic drug resistance (PDR) is a well-described phenomenon occurring in fungi and shares several similarities with processes in bacteria and higher eukaryotes. This PDR subfamily represents domain I of its (ABC-IM)2 organization. ABC transporters are a…	pfam06422, PDR_CDR, CDR ABC transporter. Corresponds to a region of the PDR/CDR subgroup of ABC transporters comprising extracellular loop 3, transmembrane segment 6 and linker region. 2.23e-18	-	KOG0065, KOG0065, KOG0065, Pleiotropic drug resistance proteins (PDR1-15), ABC superfamily [Secondary metabolites biosynthesis, transport and catabolism]. 1.16e-36	sp|O74676|CDR4_CANAX ABC transporter CDR4 OS=Candida albicans GN=CDR4 PE=3 SV=1 0.0	-	KAJ3009872.1 hypothetical protein HDU68_002453, partial [Siphonaria sp. JEL0065] 3.41e-201	-
TRINITY_DN2695_c0_g1	0.905135	6.0375	-2.73775	0.00618316	0.0341269	down	cd03188, GST_C_Beta, C-terminal, alpha helical domain of Class Beta Glutathione S-transferases. Glutathione S-transferase (GST) C-terminal domain family, Class Beta subfamily; GSTs are cytosolic dimeric proteins involved in cellular detoxification by catalyzing the conjugation of glutathione (GSH) with a wide range of endogenous and xenobiotic alkylating agents, including carcinogens, therapeutic…	-	K00799-ko00480 Glutathione metabolism;ko00980 Metabolism of xenobiotics by cytochrome P450;ko00982 Drug metabolism - cytochrome P450	-	sp|P44521|GST_HAEIN Glutathione S-transferase OS=Haemophilus influenzae (strain ATCC 51907 / DSM 11121 / KW20 / Rd) GN=gst PE=3 SV=1 4.56e-13	-	KAF5271644.1 hypothetical protein FQR65_LT05265 [Abscondita terminalis] 2.56e-11	-
TRINITY_DN18455_c0_g1	1.66118	11.0715	-2.73657	0.00121385	0.00970396	down	cd17323, MFS_Tpo1_MDR_like, Yeast Polyamine transporter 1 (Tpo1) and similar multidrug resistance (MDR) transporters of the Major Facilitator Superfamily. This family is composed of fungal multidrug resistance (MDR) transporters including several proteins from Saccharomyces cerevisiae such as polyamine transporters 1-4 (Tpo1-4), quinidine resistance proteins 1-3 (Qdr1-3), dityrosine transporter 1…	-	-	KOG0255, KOG0255, KOG0255, Synaptic vesicle transporter SVOP and related transporters (major facilitator superfamily) [General function prediction only]. 5.28e-12	sp|S0DZN4|BIK6_GIBF5 Efflux pump bik6 OS=Gibberella fujikuroi (strain CBS 195.34 / IMI 58289 / NRRL A-6831) GN=bik6 PE=2 SV=1 2.68e-134	-	CAF4220461.1 unnamed protein product, partial [Adineta steineri] 6.78e-95	-
TRINITY_DN13009_c0_g1	3.68987	24.4173	-2.72626	4.36159e-06	8.67609e-05	down	cd03443, PaaI_thioesterase, PaaI_thioesterase is a tetrameric acyl-CoA thioesterase with a hot dog fold and one of several proteins responsible for phenylacetic acid (PA) degradation in bacteria. Although orthologs of PaaI exist in archaea and eukaryotes, their function has not been determined. Sequence similarity between PaaI, E. coli medium chain acyl-CoA thioesterase II, and human thioesterase…	pfam04909, Amidohydro_2, Amidohydrolase. These proteins are amidohydrolases that are related to pfam01979. 8.19e-06	-	KOG4245, KOG4245, KOG4245, Predicted metal-dependent hydrolase of the TIM-barrel fold [General function prediction only]. 1.01e-19	sp|P23262|NHG1_PSEPU Salicylate hydroxylase OS=Pseudomonas putida GN=nahG PE=1 SV=4 2.15e-46	-	XP_037542037.1 2-amino-3-carboxymuconate-6-semialdehyde decarboxylase [Nematolebias whitei] 9.89e-24	-
TRINITY_DN14114_c0_g1	132.052	872.836	-2.7246	2.92622e-06	6.10758e-05	down	cd08646, FMT_core_Met-tRNA-FMT_N, Methionyl-tRNA formyltransferase, N-terminal hydrolase domain. Methionyl-tRNA formyltransferase (Met-tRNA-FMT), N-terminal formyltransferase domain. Met-tRNA-FMT transfers a formyl group from N-10 formyltetrahydrofolate to the amino terminal end of a methionyl-aminoacyl-tRNA acyl moiety, yielding formyl-Met-tRNA. Formyl-Met-tRNA plays essential role in protein tr…	pfam05093, CIAPIN1, Cytokine-induced anti-apoptosis inhibitor 1, Fe-S biogenesis. Anamorsin, subsequently named CIAPIN1 for cytokine-induced anti-apoptosis inhibitor 1, in humans is the homolog of yeast Dre2, a conserved soluble eukaryotic Fe-S cluster protein, that functions in cytosolic Fe-S protein biogenesis. It is found in both the cytoplasm and in the mitochondrial intermembrane space (IMS)…	K00604-ko00670 One carbon pool by folate;ko00970 Aminoacyl-tRNA biosynthesis	KOG3082, KOG3082, KOG3082, Methionyl-tRNA formyltransferase [Translation, ribosomal structure and biogenesis]. 6.08e-16	sp|A7EYZ4|DRE2_SCLS1 Fe-S cluster assembly protein dre2 OS=Sclerotinia sclerotiorum (strain ATCC 18683 / 1980 / Ss-1) GN=dre2 PE=3 SV=1 8.37e-37	GO:0003674, molecular_function;GO:0003824, catalytic activity;GO:0004479, methionyl-tRNA formyltransferase activity;GO:0005575, cellular_component;GO:0005622, intracellular;GO:0005623, cell;GO:0005737, cytoplasm;GO:0005739, mitochondrion;GO:0006139, nucleobase-containing compound metabolic process;GO:0006396, RNA processing;GO:0006399, tRNA metabolic process;GO:0006400, tRNA modification;GO:00064…	KAF6406434.1 cytokine induced apoptosis inhibitor 1 [Molossus molossus] 7.33e-17	-
TRINITY_DN13719_c2_g3	3.1468	20.7939	-2.72421	4.44246e-06	8.80938e-05	down	cd06179, MFS_TRI12_like, Fungal trichothecene efflux pump (TRI12) of the Major Facilitator Superfamily of transporters. This family includes Fusarium sporotrichioides trichothecene efflux pump (TRI12), which may play a role in F. sporotrichioides self-protection against trichothecenes. TRI12 belongs to the Major Facilitator Superfamily (MFS) of membrane transport proteins, which are thought to fu…	pfam06609, TRI12, Fungal trichothecene efflux pump (TRI12). This family consists of several fungal specific trichothecene efflux pump proteins. Many of the genes involved in trichothecene toxin biosynthesis in Fusarium sporotrichioides are present within a gene cluster.It has been suggested that TRI12 may play a role in F. sporotrichioides self-protection against trichothecenes. 3.25e-08	-	-	sp|Q9HE13|YI32_SCHPO Uncharacterized MFS-type transporter C1399.02 OS=Schizosaccharomyces pombe (strain 972 / ATCC 24843) GN=SPAC1399.02 PE=3 SV=1 1.47e-38	-	KAJ3010587.1 hypothetical protein HDU68_002075 [Siphonaria sp. JEL0065] 8.32e-46	-
TRINITY_DN10910_c0_g1	228.387	1506.98	-2.7221	0.000113078	0.00139548	down	-	-	-	-	-	-	-	-
TRINITY_DN1884_c0_g1	0.427253	2.81395	-2.71943	0.00970669	0.0477854	down	-	-	-	-	-	-	-	-
TRINITY_DN13575_c0_g1	2.45423	16.1528	-2.71844	2.67354e-07	7.37167e-06	down	cd17327, MFS_FEN2_like, Pantothenate transporter FEN2 and similar transporters of the Major Facilitator Superfamily. This family is composed of Saccharomyces cerevisiae pantothenate transporter FEN2 (or fenpropimorph resistance protein 2) and similar proteins from fungi and bacteria including fungal vitamin H transporter, allantoate permease, and high-affinity nicotinic acid transporter, as well …	pfam03959, FSH1, Serine hydrolase (FSH1). This is a family of serine hydrolases. 5.81e-11	-	KOG2533, KOG2533, KOG2533, Permease of the major facilitator superfamily [Carbohydrate transport and metabolism]. 2.36e-45	sp|P40445|YIQ6_YEAST Uncharacterized transporter YIL166C OS=Saccharomyces cerevisiae (strain ATCC 204508 / S288c) GN=YIL166C PE=1 SV=1 2.12e-148	-	CAF2752080.1 unnamed protein product [Rotaria sp. Silwood2] >CAF2909301.1 unnamed protein product [Rotaria sp. Silwood2] >CAF3301913.1 unnamed protein product [Rotaria sp. Silwood2] >CAF4071427.1 unnamed protein product [Rotaria sp. Silwood2] >CAF4164566.1 unnamed protein product [Rotaria sp. Silwood2] 7.12e-149	-
TRINITY_DN9982_c0_g1	8.11452	53.1692	-2.71201	0.000263744	0.00284106	down	cd03813, GT4-like, glycosyltransferase family 4 proteins. This family is most closely related to the GT4 family of glycosyltransferases. Glycosyltransferases catalyze the transfer of sugar moieties from activated donor molecules to specific acceptor molecules, forming glycosidic bonds. The acceptor molecule can be a lipid, a protein, a heterocyclic compound, or another carbohydrate residue. This …	-	-	-	-	-	KAJ3029686.1 hypothetical protein HDU68_011402 [Siphonaria sp. JEL0065] 1.62e-115	-
TRINITY_DN10346_c0_g1	4.61972	30.1569	-2.70661	0.00106301	0.0087061	down	cd11051, CYP59-like, cytochrome P450 family 59 and similar cytochrome P450s. This family is composed of Aspergillus nidulans cytochrome P450 59 (CYP59), also called sterigmatocystin biosynthesis P450 monooxygenase stcS, and similar fungal proteins. CYP59 is required for the conversion of versicolorin A to sterigmatocystin. This family belongs to the large cytochrome P450 (P450, CYP) superfamily o…	pfam00067, p450, Cytochrome P450. Cytochrome P450s are haem-thiolate proteins involved in the oxidative degradation of various compounds. They are particularly well known for their role in the degradation of environmental toxins and mutagens. They can be divided into 4 classes, according to the method by which electrons from NAD(P)H are delivered to the catalytic site. Sequence conservation is re…	-	KOG0157, KOG0157, KOG0157, Cytochrome P450 CYP4/CYP19/CYP26 subfamilies [Secondary metabolites biosynthesis, transport and catabolism, Lipid transport and metabolism]. 7.94e-35	sp|Q00714|STCS_EMENI Probable sterigmatocystin biosynthesis P450 monooxygenase stcS OS=Emericella nidulans (strain FGSC A4 / ATCC 38163 / CBS 112.46 / NRRL 194 / M139) GN=stcS PE=1 SV=2 2.78e-44	-	XP_020863343.1 cytochrome P450 4V2 [Phascolarctos cinereus] 4.07e-32	-
TRINITY_DN10371_c0_g1	3.67387	23.9383	-2.70395	1.46088e-05	0.000248917	down	cd07098, ALDH_F15-22, Aldehyde dehydrogenase family 15A1 and 22A1-like. Aldehyde dehydrogenase family members ALDH15A1 (Saccharomyces cerevisiae YHR039C) and ALDH22A1 (Arabidopsis thaliana, EC=1.2.1.3), and similar sequences, are in this CD. Significant improvement of stress tolerance in tobacco plants was observed by overexpressing the ALDH22A1 gene from maize (Zea mays) and was accompanied by a…	pfam00171, Aldedh, Aldehyde dehydrogenase family. This family of dehydrogenases act on aldehyde substrates. Members use NADP as a cofactor. The family includes the following members: The prototypical members are the aldehyde dehydrogenases EC:1.2.1.3. Succinate-semialdehyde dehydrogenase EC:1.2.1.16. Lactaldehyde dehydrogenase EC:1.2.1.22. Benzaldehyde dehydrogenase EC:1.2.1.28. Methylmalonate-se…	-	KOG2454, KOG2454, KOG2454, Betaine aldehyde dehydrogenase [Energy production and conversion]. 6.80e-170	sp|P38694|MSC7_YEAST Putative aldehyde dehydrogenase-like protein YHR039C OS=Saccharomyces cerevisiae (strain ATCC 204508 / S288c) GN=MSC7 PE=1 SV=1 1.22e-175	GO:0000003, reproduction;GO:0000280, nuclear division;GO:0003674, molecular_function;GO:0003824, catalytic activity;GO:0004029, aldehyde dehydrogenase (NAD) activity;GO:0005575, cellular_component;GO:0005622, intracellular;GO:0005623, cell;GO:0005737, cytoplasm;GO:0005783, endoplasmic reticulum;GO:0006139, nucleobase-containing compound metabolic process;GO:0006259, DNA metabolic process;GO:00063…	CAF4517190.1 unnamed protein product [Rotaria sp. Silwood2] 1.48e-56	-
TRINITY_DN8922_c0_g1	1.21809	7.93193	-2.70306	1.68143e-05	0.000281219	down	-	pfam00295, Glyco_hydro_28, Glycosyl hydrolases family 28. Glycosyl hydrolase family 28 includes polygalacturonase EC:3.2.1.15 as well as rhamnogalacturonase A(RGase A), EC:3.2.1.-. These enzymes are important in cell wall metabolism. 6.69e-113	K01184-ko00500 Starch and sucrose metabolism;ko00040 Pentose and glucuronate interconversions	-	sp|Q00446|PGLR1_COLLN Endopolygalacturonase 1 OS=Colletotrichum lindemuthianum GN=PG1 PE=3 SV=1 1.02e-157	GO:0000272, polysaccharide catabolic process;GO:0003674, molecular_function;GO:0003824, catalytic activity;GO:0004553, hydrolase activity, hydrolyzing O-glycosyl compounds;GO:0004650, polygalacturonase activity;GO:0005575, cellular_component;GO:0005576, extracellular region;GO:0005975, carbohydrate metabolic process;GO:0005976, polysaccharide metabolic process;GO:0007124, pseudohyphal growth;GO:0…	KAH7711967.1 polygalacturonase [Aphelenchus avenae] 6.89e-137	-
TRINITY_DN23317_c0_g1	5.86835	38.2114	-2.70298	3.10819e-05	0.000474858	down	-	pfam04261, Dyp_perox, Dyp-type peroxidase family. This family of dye-decolourising peroxidases lack a typical heme-binding region. 3.03e-52	-	-	sp|P76536|YFEX_ECOLI Probable deferrochelatase/peroxidase YfeX OS=Escherichia coli (strain K12) GN=yfeX PE=1 SV=2 6.25e-44	-	XP_029718082.1 uncharacterized protein LOC115260881 [Aedes albopictus] 1.04e-128	-
TRINITY_DN9914_c0_g1	3.79213	24.6606	-2.70113	0.000138868	0.0016621	down	cd07114, ALDH_DhaS, Uncharacterized Candidatus pelagibacter aldehyde dehydrogenase, DhaS-like. Uncharacterized aldehyde dehydrogenase from Candidatus pelagibacter (DhaS) and other related sequences are present in this CD. 1.39e-102	pfam00171, Aldedh, Aldehyde dehydrogenase family. This family of dehydrogenases act on aldehyde substrates. Members use NADP as a cofactor. The family includes the following members: The prototypical members are the aldehyde dehydrogenases EC:1.2.1.3. Succinate-semialdehyde dehydrogenase EC:1.2.1.16. Lactaldehyde dehydrogenase EC:1.2.1.22. Benzaldehyde dehydrogenase EC:1.2.1.28. Methylmalonate-se…	-	KOG2450, KOG2450, KOG2450, Aldehyde dehydrogenase [Energy production and conversion]. 6.58e-86	sp|P17202|BADH_SPIOL Betaine aldehyde dehydrogenase, chloroplastic OS=Spinacia oleracea PE=1 SV=1 1.21e-74	-	KAG4081050.1 hypothetical protein HA402_010221 [Bradysia odoriphaga] 1.50e-92	-
TRINITY_DN13758_c0_g1	1.66782	10.7995	-2.69494	0.000154105	0.00181709	down	cd11482, SLC-NCS1sbd_NRT1-like, nucleobase-cation-symport-1 (NCS1) transporter NRT1-like; solute-binding domain. This fungal NCS1 subfamily includes various Saccharomyces cerevisiae transporters: nicotinamide riboside transporter 1 (Nrt1p, also called Thi71p), Dal4p (allantoin permease), Fui1p (uridine permease), Fur4p (uracil permease), and Thi7p (thiamine transporter). NCS1s are essential compo…	pfam02133, Transp_cyt_pur, Permease for cytosine/purines, uracil, thiamine, allantoin. 1.09e-63	-	KOG2466, KOG2466, KOG2466, Uridine permease/thiamine transporter/allantoin transport [Nucleotide transport and metabolism, Coenzyme transport and metabolism]. 7.95e-91	sp|O14035|YEME_SCHPO Uncharacterized permease C29B12.14c OS=Schizosaccharomyces pombe (strain 972 / ATCC 24843) GN=SPAC29B12.14c PE=3 SV=2 2.29e-87	-	CAF0929159.1 unnamed protein product [Adineta steineri] >CAF3997827.1 unnamed protein product [Adineta steineri] 2.24e-86	-
TRINITY_DN14344_c0_g1	1.64705	10.6559	-2.69369	0.000252107	0.00273658	down	-	-	-	-	-	-	-	-
TRINITY_DN13674_c0_g1	2.56707	16.6071	-2.6936	0.000195995	0.00222636	down	-	-	-	-	-	-	-	-
TRINITY_DN10372_c0_g1	7.9212	51.243	-2.69357	0.000175051	0.00201729	down	-	-	-	-	-	-	-	-
TRINITY_DN11563_c0_g1	48.3064	312.391	-2.69307	0.00720258	0.0381785	down	cd05384, CAP_PRY1-like, CAP (cysteine-rich secretory proteins, antigen 5, and pathogenesis-related 1 proteins) domain of pathogen-related yeast 1 (PRY1) protein and similar fungal proteins. PRY1, also called pathogenesis-related protein 1, is a yeast protein that is up-regulated in core ESCRT mutants. It is a secreted protein required for efficient export of lipids such as acetylated sterols, and…	pfam00743, FMO-like, Flavin-binding monooxygenase-like. This family includes FMO proteins, cyclohexanone mono-oxygenase and a number of different mono-oxygenases. 1.49e-13	-	KOG3017, KOG3017, KOG3017, Defense-related protein containing SCP domain [Function unknown]. 3.47e-09	sp|A7HU16|BVMO_PARL1 Baeyer-Villiger monooxygenase OS=Parvibaculum lavamentivorans (strain DS-1 / DSM 13023 / NCIMB 13966) GN=Plav_1781 PE=1 SV=1 2.17e-131	-	KAE9551537.1 hypothetical protein FO519_005251 [Halicephalobus sp. NKZ332] 1.65e-125	-
TRINITY_DN8013_c0_g1	18.0556	116.452	-2.68922	0.000642219	0.00592829	down	cd07091, ALDH_F1-2_Ald2-like, ALDH subfamily: ALDH families 1and 2, including 10-formyltetrahydrofolate dehydrogenase, NAD+-dependent retinal dehydrogenase 1 and related proteins. ALDH subfamily which includes the NAD+-dependent retinal dehydrogenase 1 (RALDH 1, ALDH1, EC=1.2.1.36), also known as aldehyde dehydrogenase family 1 member A1 (ALDH1A1), in humans, a homotetrameric, cytosolic enzyme th…	pfam00171, Aldedh, Aldehyde dehydrogenase family. This family of dehydrogenases act on aldehyde substrates. Members use NADP as a cofactor. The family includes the following members: The prototypical members are the aldehyde dehydrogenases EC:1.2.1.3. Succinate-semialdehyde dehydrogenase EC:1.2.1.16. Lactaldehyde dehydrogenase EC:1.2.1.22. Benzaldehyde dehydrogenase EC:1.2.1.28. Methylmalonate-se…	K00128-ko00903 Limonene and pinene degradation;ko00330 Arginine and proline metabolism;ko00280 Valine, leucine and isoleucine degradation;ko00310 Lysine degradation;ko00625 Chloroalkane and chloroalkene degradation;ko00561 Glycerolipid metabolism;ko00620 Pyruvate metabolism;ko00410 beta-Alanine metabolism;ko00040 Pentose and glucuronate interconversions;ko00071 Fatty acid degradation;ko00380 Tryp…	KOG2450, KOG2450, KOG2450, Aldehyde dehydrogenase [Energy production and conversion]. 7.18e-146	sp|P42041|ALDH_ALTAL Aldehyde dehydrogenase OS=Alternaria alternata GN=ALTA10 PE=1 SV=2 5.45e-152	-	CAH1797144.1 unnamed protein product [Owenia fusiformis] 6.57e-144	-
TRINITY_DN7377_c0_g1	9.95787	63.8813	-2.68149	9.43662e-07	2.30228e-05	down	-	-	-	-	sp|P47159|YJ94_YEAST Uncharacterized membrane protein YJR124C OS=Saccharomyces cerevisiae (strain ATCC 204508 / S288c) GN=YJR124C PE=1 SV=1 3.10e-59	-	KAJ3018815.1 hypothetical protein HDU68_010979 [Siphonaria sp. JEL0065] 4.62e-56	-
TRINITY_DN12997_c0_g1	1.40215	8.97957	-2.679	0.000865996	0.00739763	down	-	pfam01425, Amidase, Amidase. 2.26e-29	K01426-ko00627 Aminobenzoate degradation;ko00643 Styrene degradation;ko00360 Phenylalanine metabolism;ko00380 Tryptophan metabolism;ko00330 Arginine and proline metabolism	KOG1212, KOG1212, KOG1212, Amidases [Translation, ribosomal structure and biogenesis, Lipid transport and metabolism, Signal transduction mechanisms]. 2.71e-55	sp|Q12559|AMDS_ASPOR Acetamidase OS=Aspergillus oryzae (strain ATCC 42149 / RIB 40) GN=amdS PE=3 SV=2 1.31e-89	-	CAF3711633.1 unnamed protein product [Rotaria sp. Silwood1] 1.57e-97	-
TRINITY_DN8533_c0_g1	20.5262	131.379	-2.6782	1.24813e-07	3.75059e-06	down	-	pfam00180, Iso_dh, Isocitrate/isopropylmalate dehydrogenase. 5.58e-60	K05824-ko01210 2-Oxocarboxylic acid metabolism;ko00300 Lysine biosynthesis;ko01230 Biosynthesis of amino acids	KOG0785, KOG0785, KOG0785, Isocitrate dehydrogenase, alpha subunit [Amino acid transport and metabolism]. 1.33e-71	sp|O14104|LYS12_SCHPO Homoisocitrate dehydrogenase OS=Schizosaccharomyces pombe (strain 972 / ATCC 24843) GN=lys12 PE=1 SV=1 1.36e-151	GO:0003674, molecular_function;GO:0003824, catalytic activity;GO:0005575, cellular_component;GO:0005622, intracellular;GO:0005623, cell;GO:0005737, cytoplasm;GO:0005739, mitochondrion;GO:0006082, organic acid metabolic process;GO:0006520, cellular amino acid metabolic process;GO:0006553, lysine metabolic process;GO:0006807, nitrogen compound metabolic process;GO:0008150, biological_process;GO:000…	XP_039275170.1 homoisocitrate dehydrogenase-like [Nilaparvata lugens] 7.31e-174	-
TRINITY_DN13527_c0_g1	23.0795	147.522	-2.67624	1.38414e-06	3.17199e-05	down	cd12148, fungal_TF_MHR, fungal transcription factor regulatory middle homology region. This domain is present in the large family of fungal zinc cluster transcription factors that contain an N-terminal GAL4-like C6 zinc binuclear cluster DNA-binding domain. Examples of members of this large fungal group are the following Saccharomyces cerevisiae transcription factors, GAL4, STB5, DAL81, CAT8, RDR…	pfam04082, Fungal_trans, Fungal specific transcription factor domain. 1.09e-08	-	-	sp|Q1MTM9|YFN1_SCHPO Uncharacterized transcriptional regulatory protein C1327.01c OS=Schizosaccharomyces pombe (strain 972 / ATCC 24843) GN=SPAC1327.01c PE=1 SV=2 9.24e-17	GO:0000976, transcription regulatory region sequence-specific DNA binding;GO:0000977, RNA polymerase II regulatory region sequence-specific DNA binding;GO:0000978, RNA polymerase II proximal promoter sequence-specific DNA binding;GO:0000981, RNA polymerase II transcription factor activity, sequence-specific DNA binding;GO:0000982, transcription factor activity, RNA polymerase II proximal promoter…	KAJ3019912.1 hypothetical protein HDU68_010434 [Siphonaria sp. JEL0065] 8.44e-13	-
TRINITY_DN9117_c0_g1	1.47491	9.41803	-2.6748	6.71756e-05	0.000905481	down	cd17358, MFS_GLUT6_8_Class3_like, Glucose transporter (GLUT) types 6 and 8, Class 3 GLUTs, and similar transporters of the Major Facilitator Superfamily. This subfamily is composed of glucose transporter type 6 (GLUT6), GLUT8, plant early dehydration-induced gene ERD6-like proteins, and similar insect proteins including facilitated trehalose transporter Tret1-1. GLUTs, also called Solute carrier …	pfam00083, Sugar_tr, Sugar (and other) transporter. 2.82e-23	-	KOG0254, KOG0254, KOG0254, Predicted transporter (major facilitator superfamily) [General function prediction only]. 2.26e-25	sp|P53048|MAL11_YEAST General alpha-glucoside permease OS=Saccharomyces cerevisiae (strain ATCC 204508 / S288c) GN=MAL11 PE=1 SV=1 8.76e-117	-	CAF1455099.1 unnamed protein product [Adineta steineri] 1.85e-39	-
TRINITY_DN14247_c3_g1	5.61018	35.8144	-2.67442	0.00010863	0.00134843	down	-	pfam10637, Ofd1_CTDD, Oxoglutarate and iron-dependent oxygenase degradation C-term. Ofd1 is a prolyl 4-hydroxylase-like 2-oxoglutarate-Fe(II) dioxygenase that accelerates the degradation of Sre1N in the presence of oxygen. The domain is conserved from yeasts to humans. Yeast Sre1 is the orthologue of mammalian sterol regulatory element binding protein (SREBP), and it responds to changes in oxygen…	-	KOG3844, KOG3844, KOG3844, Predicted component of NuA3 histone acetyltransferase complex [Chromatin structure and dynamics]. 1.84e-63	sp|Q11120|OFD1_SCHPO Prolyl 3,4-dihydroxylase ofd1 OS=Schizosaccharomyces pombe (strain 972 / ATCC 24843) GN=ofd1 PE=1 SV=1 4.18e-113	GO:0000288, nuclear-transcribed mRNA catabolic process, deadenylation-dependent decay;GO:0000956, nuclear-transcribed mRNA catabolic process;GO:0003674, molecular_function;GO:0003676, nucleic acid binding;GO:0003723, RNA binding;GO:0003727, single-stranded RNA binding;GO:0003824, catalytic activity;GO:0005488, binding;GO:0005506, iron ion binding;GO:0005575, cellular_component;GO:0005622, intrace…	KAJ3026801.1 hypothetical protein HDU68_005032 [Siphonaria sp. JEL0065] 1.13e-56	-
TRINITY_DN25865_c0_g1	44.801	285.736	-2.67308	8.44001e-07	2.07507e-05	down	-	pfam04707, PRELI, PRELI-like family. This family includes a conserved region found in the PRELI protein and yeast YLR168C gene MSF1 product. The function of this protein is unknown, though it is thought to be involved in intra-mitochondrial protein sorting. This region is also found in a number of other eukaryotic proteins. 4.84e-11	K02619-ko00790 Folate biosynthesis	KOG3336, KOG3336, KOG3336, Predicted member of the intramitochondrial sorting protein family [Intracellular trafficking, secretion, and vesicular transport]. 6.64e-16	sp|Q05776|UPS1_YEAST Protein UPS1, mitochondrial OS=Saccharomyces cerevisiae (strain ATCC 204508 / S288c) GN=UPS1 PE=1 SV=1 2.63e-16	-	XP_039437753.1 protein preli-like [Culex pipiens pallens] 2.22e-09	-
TRINITY_DN12377_c0_g1	208.696	1330.92	-2.67295	1.36786e-05	0.000236234	down	cd00340, GSH_Peroxidase, Glutathione (GSH) peroxidase family; tetrameric selenoenzymes that catalyze the reduction of a variety of hydroperoxides including lipid peroxidases, using GSH as a specific electron donor substrate. GSH peroxidase contains one selenocysteine residue per subunit, which is involved in catalysis. Different isoenzymes are known in mammals,which are involved in protection aga…	pfam00255, GSHPx, Glutathione peroxidase. 5.21e-33	K00432-ko00480 Glutathione metabolism;ko00590 Arachidonic acid metabolism;ko04918 Thyroid hormone synthesis	KOG1651, KOG1651, KOG1651, Glutathione peroxidase [Posttranslational modification, protein turnover, chaperones]. 8.57e-44	sp|P38143|GPX2_YEAST Glutathione peroxidase 2 OS=Saccharomyces cerevisiae (strain ATCC 204508 / S288c) GN=GPX2 PE=1 SV=1 1.97e-55	GO:0000302, response to reactive oxygen species;GO:0003674, molecular_function;GO:0003824, catalytic activity;GO:0004601, peroxidase activity;GO:0005575, cellular_component;GO:0005622, intracellular;GO:0005623, cell;GO:0005737, cytoplasm;GO:0005739, mitochondrion;GO:0005829, cytosol;GO:0006950, response to stress;GO:0006979, response to oxidative stress;GO:0008150, biological_process;GO:0008152, …	QRW45203.1 glutathione peroxidase, partial [Macrosiphum euphorbiae] 4.57e-56	Macrosiphum euphorbiae glutathione peroxidase (GPx) mRNA, partial cds 1.73e-38
TRINITY_DN25592_c0_g1	2.2941	14.6204	-2.67198	0.000121762	0.00148391	down	cd08951, DR_C-13_KR_SDR_c_like, daunorubicin C-13 ketoreductase (KR), classical (c)-like SDRs. Daunorubicin is a clinically important therapeutic compound used in some cancer treatments. Daunorubicin C-13 ketoreductase is member of the classical SDR family with a canonical glycine-rich NAD(P)-binding motif, but lacking a complete match to the active site tetrad characteristic of this group. The c…	-	-	KOG1208, KOG1208, KOG1208, Dehydrogenases with different specificities (related to short-chain alcohol dehydrogenases) [Secondary metabolites biosynthesis, transport and catabolism]. 4.75e-08	sp|Q5AV81|Y7799_EMENI Uncharacterized oxidoreductase AN7799 OS=Emericella nidulans (strain FGSC A4 / ATCC 38163 / CBS 112.46 / NRRL 194 / M139) GN=AN7799 PE=1 SV=2 6.62e-51	GO:0006950, response to stress;GO:0006970, response to osmotic stress;GO:0008150, biological_process;GO:0009628, response to abiotic stimulus;GO:0009987, cellular process;GO:0033554, cellular response to stress;GO:0050896, response to stimulus;GO:0051716, cellular response to stimulus;GO:0071214, cellular response to abiotic stimulus;GO:0071470, cellular response to osmotic stress;GO:0104004, cel…	XP_033629475.1 retinol dehydrogenase 13-like [Asterias rubens] 9.18e-14	-
TRINITY_DN10876_c0_g2	2.28953	14.5908	-2.67193	0.000360491	0.00369532	down	-	-	-	-	-	-	-	-
TRINITY_DN12575_c0_g1	6.96031	44.3436	-2.6715	5.16062e-06	0.000100763	down	-	pfam06985, HET, Heterokaryon incompatibility protein (HET). This family represents a conserved region approximately 150 residues long within various heterokaryon incompatibility proteins that seem to be restricted to ascomycete fungi. Genetic differences in specific het genes prevent a viable heterokaryotic fungal cell from being formed by the fusion of filaments from two different wild-type stra…	-	-	-	-	KAI1693513.1 heterokaryon incompatibility protein (HET) domain-containing protein [Ditylenchus destructor] 8.38e-38	-
TRINITY_DN21018_c0_g1	1.59993	10.1861	-2.67053	0.000954127	0.00797364	down	-	-	-	-	-	-	-	-
TRINITY_DN9038_c0_g1	2.55103	16.2336	-2.66983	1.38499e-06	3.17199e-05	down	cd02878, GH18_zymocin_alpha, Zymocin, alpha subunit. Zymocin is a heterotrimeric enzyme that inhibits yeast cell cycle progression. The zymocin alpha subunit has a chitinase activity that is essential for holoenzyme action from the cell exterior while the gamma subunit contains the intracellular toxin responsible for G1 phase cell cycle arrest. The zymocin alpha and beta subunits are thought to a…	pfam00704, Glyco_hydro_18, Glycosyl hydrolases family 18. 2.24e-17	-	KOG2806, KOG2806, KOG2806, Chitinase [Carbohydrate transport and metabolism]. 1.24e-09	sp|P09805|KTXA_KLULA Killer toxin subunits alpha/beta OS=Kluyveromyces lactis (strain ATCC 8585 / CBS 2359 / DSM 70799 / NBRC 1267 / NRRL Y-1140 / WM37) PE=1 SV=1 1.04e-84	-	CAF4436337.1 unnamed protein product [Rotaria sp. Silwood2] >CAF4439672.1 unnamed protein product [Rotaria sp. Silwood2] 2.51e-49	-
TRINITY_DN14204_c2_g3	2.97282	18.8513	-2.66476	0.0010583	0.00867875	down	cd13934, RNase_H_Dikarya_like, Fungal (dikarya) Ribonuclease H, uncharacterized. This family contains dikarya RNase H, many of which are uncharacterized. Ribonuclease H (RNase H) enzymes are divided into two major families, Type 1 and Type 2, based on amino acid sequence similarities and biochemical properties. RNase H is an endonuclease that cleaves the RNA strand of an RNA/DNA hybrid in a seque…	pfam00075, RNase_H, RNase H. RNase H digests the RNA strand of an RNA/DNA hybrid. Important enzyme in retroviral replication cycle, and often found as a domain associated with reverse transcriptases. Structure is a mixed alpha+beta fold with three a/b/a layers. 5.31e-08	K03469-ko03030 DNA replication	KOG3752, KOG3752, KOG3752, Ribonuclease H [Replication, recombination and repair]. 1.94e-07	sp|A7GAG3|RNH_CLOBL Ribonuclease H OS=Clostridium botulinum (strain Langeland / NCTC 10281 / Type F) GN=rnhA PE=3 SV=1 6.48e-12	-	MCL4112785.1 hypothetical protein [Idotea baltica] 1.47e-11	-
TRINITY_DN7825_c0_g1	0.675454	4.2802	-2.66375	0.00513626	0.0295684	down	cd11041, CYP503A1-like, cytochrome P450 family 503, subfamily A, polypeptide 1 and similar cytochrome P450s. This family is composed of predominantly fungal cytochrome P450s (CYPs) with similarity to Fusarium fujikuroi Cytochrome P450 503A1 (CYP503A1, also called ent-kaurene oxidase or cytochrome P450-4), Aspergillus nidulans austinol synthesis protein I (ausI), Alternaria alternata tentoxin synt…	pfam00067, p450, Cytochrome P450. Cytochrome P450s are haem-thiolate proteins involved in the oxidative degradation of various compounds. They are particularly well known for their role in the degradation of environmental toxins and mutagens. They can be divided into 4 classes, according to the method by which electrons from NAD(P)H are delivered to the catalytic site. Sequence conservation is re…	-	KOG0158, KOG0158, KOG0158, Cytochrome P450 CYP3/CYP5/CYP6/CYP9 subfamilies [Secondary metabolites biosynthesis, transport and catabolism]. 1.99e-22	sp|Q9C449|PAXP_PENPX Cytochrome P450 monooxygenase paxP OS=Penicillium paxilli GN=paxP PE=1 SV=1 1.22e-70	-	XP_014227659.1 probable cytochrome P450 49a1 [Trichogramma pretiosum] 1.55e-16	-
TRINITY_DN12722_c0_g1	13.2257	83.7793	-2.66324	3.37417e-07	9.08667e-06	down	-	pfam00549, Ligase_CoA, CoA-ligase. This family includes the CoA ligases Succinyl-CoA synthetase alpha and beta chains, malate CoA ligase and ATP-citrate lyase. Some members of the family utilize ATP others use GTP. 1.09e-09	K01899-ko00020 Citrate cycle (TCA cycle);ko01200 Carbon metabolism;ko00640 Propanoate metabolism	KOG1255, KOG1255, KOG1255, Succinyl-CoA synthetase, alpha subunit [Energy production and conversion]. 2.42e-67	sp|P53598|SUCA_YEAST Succinyl-CoA ligase [ADP-forming] subunit alpha, mitochondrial OS=Saccharomyces cerevisiae (strain ATCC 204508 / S288c) GN=LSC1 PE=1 SV=1 4.51e-72	-	CAG9823540.1 unnamed protein product [Phaedon cochleariae] 3.06e-82	-
TRINITY_DN12189_c0_g1	11.2443	71.1685	-2.66204	3.41923e-05	0.000511918	down	-	pfam11374, DUF3176, Protein of unknown function (DUF3176). This eukaryotic family of proteins has no known function. 5.85e-14	-	KOG4245, KOG4245, KOG4245, Predicted metal-dependent hydrolase of the TIM-barrel fold [General function prediction only]. 1.22e-25	sp|Q8R519|ACMSD_MOUSE 2-amino-3-carboxymuconate-6-semialdehyde decarboxylase OS=Mus musculus GN=Acmsd PE=1 SV=2 3.24e-24	-	KAJ3031031.1 hypothetical protein HDU68_006869 [Siphonaria sp. JEL0065] 3.23e-27	-
TRINITY_DN7340_c0_g1	1.57324	9.9342	-2.65867	0.00063739	0.00589227	down	-	pfam11905, DUF3425, Domain of unknown function (DUF3425). This presumed domain is functionally uncharacterized. This domain is found in eukaryotes. This domain is typically between 120 to 143 amino acids in length. 1.01e-06	-	-	-	-	-	-
TRINITY_DN13897_c0_g1	3.05617	19.1602	-2.64831	0.00142504	0.0110761	down	-	-	-	-	-	-	-	-
TRINITY_DN13187_c0_g1	46.9233	294.176	-2.6483	5.90336e-05	0.000810342	down	cd20264, Complex1_LYR_LYRM4, LYR (leucine-tyrosine-arginine) motif found in LYR motif-containing protein 4 (LYRM4) and similar proteins. LYRM4, also called ISD11, is a eukaryote-specific component of the mitochondrial biogenesis of Fe-S clusters which are essential cofactors in multiple processes, including oxidative phosphorylation. It is required for nuclear and mitochondrial iron-sulfur protei…	pfam05347, Complex1_LYR, Complex 1 protein (LYR family). Proteins in this family include an accessory subunit of the higher eukaryotic NADH dehydrogenase complex. In Saccharomyces cerevisiae, the Isd11 protein has been shown to play a role in Fe/S cluster biogenesis in mitochondria. We have named this family LYR after a highly conserved tripeptide motif close to the N-terminus of these proteins. …	-	KOG3801, KOG3801, KOG3801, Uncharacterized conserved protein BCN92 [RNA processing and modification]. 2.14e-20	sp|Q0VCG0|LYRM4_BOVIN LYR motif-containing protein 4 OS=Bos taurus GN=LYRM4 PE=3 SV=1 4.13e-19	GO:0005575, cellular_component;GO:0005622, intracellular;GO:0005623, cell;GO:0005737, cytoplasm;GO:0005739, mitochondrion;GO:0005740, mitochondrial envelope;GO:0005743, mitochondrial inner membrane;GO:0005759, mitochondrial matrix;GO:0005829, cytosol;GO:0006790, sulfur compound metabolic process;GO:0008150, biological_process;GO:0008152, metabolic process;GO:0009987, cellular process;GO:0016020, …	XP_013075161.1 PREDICTED: LYR motif-containing protein 4-like [Biomphalaria glabrata] >KAI8790553.1 LYR motif-containing protein 4-like [Biomphalaria glabrata] 2.03e-13	-
TRINITY_DN13380_c0_g1	18.9991	118.921	-2.64601	2.77417e-05	0.000428462	down	cd17971, DEXHc_DHX8, DEXH-box helicase domain of DEAH-box helicase 8. DEAH-box helicase 8 (DHX8 ,also known as pre-mRNA-splicing factor ATP-dependent RNA helicase PRP22) acts late in the splicing of pre-mRNA and mediates the release of the spliced mRNA from spliceosomes. DHX8 belongs to the DEAD-like helicase superfamily, a diverse family of proteins involved in ATP-dependent RNA or DNA unwinding…	pfam07717, OB_NTP_bind, Oligonucleotide/oligosaccharide-binding (OB)-fold. This family is found towards the C-terminus of the DEAD-box helicases (pfam00270). In these helicases it is apparently always found in association with pfam04408. There do seem to be a couple of instances where it occurs by itself. The structure Structure 3i4u adopts an OB-fold. helicases (pfam00270). In these helicases it…	K12818-ko03040 Spliceosome	KOG0922, KOG0922, KOG0922, DEAH-box RNA helicase [RNA processing and modification]. 0.0	sp|O42643|PRP22_SCHPO Pre-mRNA-splicing factor ATP-dependent RNA helicase prp22 OS=Schizosaccharomyces pombe (strain 972 / ATCC 24843) GN=prp22 PE=1 SV=1 0.0	GO:0000350, generation of catalytic spliceosome for second transesterification step;GO:0000375, RNA splicing, via transesterification reactions;GO:0000377, RNA splicing, via transesterification reactions with bulged adenosine as nucleophile;GO:0000390, spliceosomal complex disassembly;GO:0000393, spliceosomal conformational changes to generate catalytic conformation;GO:0000398, mRNA splicing, via…	XP_046841771.1 ATP-dependent RNA helicase DHX8-like [Xenia sp. Carnegie-2017] 0.0	PREDICTED: Hypomesus transpacificus ATP-dependent RNA helicase DHX8 (LOC124476014), mRNA 4.99e-80
TRINITY_DN8364_c0_g1	1.08116	6.75618	-2.64363	0.00351261	0.0220815	down	cd02210, cupin_BLR2406-like, Bradyrhizobium japonicum BLR2406 and related proteins, cupin domain. This family includes bacterial and fungal proteins homologous to BLR2406, a Bradyrhizobium japonicum protein of unknown function with a cupin beta barrel domain. Proteins in this subfamily appear to align closest to RmlC carbohydrate epimerase which is involved in dTDP-L-rhamnose production, and belo…	-	-	-	-	-	-	-
TRINITY_DN9983_c0_g1	0.738627	4.61519	-2.64347	0.00879093	0.0442891	down	-	-	-	-	-	-	-	-
TRINITY_DN12272_c0_g1	1.18162	7.37442	-2.64177	0.000671039	0.00611002	down	cd08217, STKc_Nek2, Catalytic domain of the Serine/Threonine Kinase, Never In Mitosis gene A (NIMA)-related kinase 2. STKs catalyze the transfer of the gamma-phosphoryl group from ATP to serine/threonine residues on protein substrates. The Nek2 subfamily includes Aspergillus nidulans NIMA kinase, the founding member of the Nek family, which was identified in a screen for cell cycle mutants preven…	pfam07714, Pkinase_Tyr, Protein tyrosine kinase. 1.07e-11	-	KOG0591, KOG0591, KOG0591, NIMA (never in mitosis)-related G2-specific serine/threonine protein kinase [Cell cycle control, cell division, chromosome partitioning]. 9.35e-48	sp|P48479|NIM1_NEUCR G2-specific protein kinase nim-1 OS=Neurospora crassa (strain ATCC 24698 / 74-OR23-1A / CBS 708.71 / DSM 1257 / FGSC 987) GN=nim-1 PE=2 SV=2 6.50e-83	GO:0000226, microtubule cytoskeleton organization;GO:0000278, mitotic cell cycle;GO:0000280, nuclear division;GO:0000910, cytokinesis;GO:0003674, molecular_function;GO:0003824, catalytic activity;GO:0004672, protein kinase activity;GO:0004674, protein serine/threonine kinase activity;GO:0005575, cellular_component;GO:0005622, intracellular;GO:0005623, cell;GO:0005815, microtubule organizing cente…	XP_002731116.1 PREDICTED: serine/threonine-protein kinase Nek2-like [Saccoglossus kowalevskii] 3.40e-35	-
TRINITY_DN8379_c0_g1	152.415	950.319	-2.64041	0.001035	0.00852061	down	-	-	-	-	-	-	-	-
TRINITY_DN12465_c0_g1	4.30095	26.7868	-2.63879	1.24259e-05	0.000217856	down	cd06179, MFS_TRI12_like, Fungal trichothecene efflux pump (TRI12) of the Major Facilitator Superfamily of transporters. This family includes Fusarium sporotrichioides trichothecene efflux pump (TRI12), which may play a role in F. sporotrichioides self-protection against trichothecenes. TRI12 belongs to the Major Facilitator Superfamily (MFS) of membrane transport proteins, which are thought to fu…	pfam06609, TRI12, Fungal trichothecene efflux pump (TRI12). This family consists of several fungal specific trichothecene efflux pump proteins. Many of the genes involved in trichothecene toxin biosynthesis in Fusarium sporotrichioides are present within a gene cluster.It has been suggested that TRI12 may play a role in F. sporotrichioides self-protection against trichothecenes. 5.59e-08	-	-	sp|B6HJU0|ROQT_PENRW Efflux pump roqT OS=Penicillium rubens (strain ATCC 28089 / DSM 1075 / NRRL 1951 / Wisconsin 54-1255) GN=roqT PE=1 SV=1 1.71e-94	-	KAJ3024382.1 hypothetical protein HDU68_008231 [Siphonaria sp. JEL0065] 4.21e-59	-
TRINITY_DN13851_c0_g1	2.45561	15.2894	-2.63838	5.32583e-06	0.000103512	down	-	-	-	-	-	-	-	-
TRINITY_DN7405_c0_g1	24.0565	149.753	-2.63809	0.00436829	0.0261419	down	cd11062, CYP58-like, cytochrome P450 family 58-like fungal cytochrome P450s. This group includes Fusarium sporotrichioides cytochrome P450 58 (CYP58, also known as Tri4 and trichodiene oxygenase), and similar fungal proteins. CYP58 catalyzes the oxygenation of trichodiene during the biosynthesis of trichothecenes, which are sesquiterpenoid toxins that act by inhibiting protein biosynthesis. The C…	pfam00067, p450, Cytochrome P450. Cytochrome P450s are haem-thiolate proteins involved in the oxidative degradation of various compounds. They are particularly well known for their role in the degradation of environmental toxins and mutagens. They can be divided into 4 classes, according to the method by which electrons from NAD(P)H are delivered to the catalytic site. Sequence conservation is re…	-	KOG0156, KOG0156, KOG0156, Cytochrome P450 CYP2 subfamily [Secondary metabolites biosynthesis, transport and catabolism]. 1.09e-18	sp|Q12612|TRI4_FUSSP Trichodiene oxygenase OS=Fusarium sporotrichioides GN=TRI4 PE=3 SV=1 4.10e-25	-	XP_028968770.1 cytochrome P450 3A5 [Galendromus occidentalis] 6.37e-18	-
TRINITY_DN11073_c0_g1	0.955531	5.94269	-2.63674	0.00251744	0.0171946	down	-	-	-	-	-	-	-	-
TRINITY_DN12989_c0_g1	72.2985	449.415	-2.63601	0.000172436	0.00199258	down	cd03233, ABCG_PDR_domain1, First domain of the pleiotropic drug resistance-like subfamily G of ATP-binding cassette transporters. The pleiotropic drug resistance (PDR) is a well-described phenomenon occurring in fungi and shares several similarities with processes in bacteria and higher eukaryotes. This PDR subfamily represents domain I of its (ABC-IM)2 organization. ABC transporters are a large …	pfam06422, PDR_CDR, CDR ABC transporter. Corresponds to a region of the PDR/CDR subgroup of ABC transporters comprising extracellular loop 3, transmembrane segment 6 and linker region. 4.54e-24	-	KOG0065, KOG0065, KOG0065, Pleiotropic drug resistance proteins (PDR1-15), ABC superfamily [Secondary metabolites biosynthesis, transport and catabolism]. 7.77e-14	sp|O74676|CDR4_CANAX ABC transporter CDR4 OS=Candida albicans GN=CDR4 PE=3 SV=1 7.17e-09	GO:0000166, nucleotide binding;GO:0000322, storage vacuole;GO:0000323, lytic vacuole;GO:0000324, fungal-type vacuole;GO:0000724, double-strand break repair via homologous recombination;GO:0000725, recombinational repair;GO:0003674, molecular_function;GO:0003824, catalytic activity;GO:0004012, phospholipid-translocating ATPase activity;GO:0005215, transporter activity;GO:0005319, lipid transporter…	KAJ3009872.1 hypothetical protein HDU68_002453, partial [Siphonaria sp. JEL0065] 7.43e-104	-
TRINITY_DN7702_c0_g2	1.96465	12.1922	-2.63362	0.00320777	0.0205825	down	-	pfam00743, FMO-like, Flavin-binding monooxygenase-like. This family includes FMO proteins, cyclohexanone mono-oxygenase and a number of different mono-oxygenases. 1.37e-13	-	KOG1399, KOG1399, KOG1399, Flavin-containing monooxygenase [Secondary metabolites biosynthesis, transport and catabolism]. 1.44e-10	sp|Q9RKB5|BVMO2_STRCO Baeyer-Villiger monooxygenase OS=Streptomyces coelicolor (strain ATCC BAA-471 / A3(2) / M145) GN=SCO3172 PE=1 SV=1 2.61e-79	-	CAF4684158.1 unnamed protein product [Rotaria sp. Silwood1] 1.05e-92	-
TRINITY_DN20897_c0_g1	30.7022	190.477	-2.63321	0.0044042	0.0263072	down	cd08157, catalase_fungal, Fungal catalases similar to yeast catalases A and T. Catalase is a ubiquitous enzyme found in both prokaryotes and eukaryotes, which is involved in the protection of cells from the toxic effects of peroxides. It catalyzes the conversion of hydrogen peroxide to water and molecular oxygen. Catalases also utilize hydrogen peroxide to oxidize various substrates such as alcoh…	pfam00199, Catalase, Catalase. 8.69e-151	K03781-ko04011 MAPK signaling pathway - yeast;ko01200 Carbon metabolism;ko00630 Glyoxylate and dicarboxylate metabolism;ko04212 Longevity regulating pathway - worm;ko04211 Longevity regulating pathway - mammal;ko04146 Peroxisome;ko00380 Tryptophan metabolism;ko04213 Longevity regulating pathway - multiple species;ko04068 FoxO signaling pathway	KOG0047, KOG0047, KOG0047, Catalase [Inorganic ion transport and metabolism]. 4.88e-164	sp|P07820|CATA_CANTR Peroxisomal catalase OS=Candida tropicalis GN=POX9 PE=1 SV=4 3.45e-170	GO:0000302, response to reactive oxygen species;GO:0003674, molecular_function;GO:0003824, catalytic activity;GO:0004096, catalase activity;GO:0004601, peroxidase activity;GO:0005488, binding;GO:0005575, cellular_component;GO:0005622, intracellular;GO:0005623, cell;GO:0005737, cytoplasm;GO:0005739, mitochondrion;GO:0005759, mitochondrial matrix;GO:0005777, peroxisome;GO:0005782, peroxisomal matri…	XP_019562520.2 catalase isoform X1 [Aedes albopictus] 3.82e-165	-
TRINITY_DN12928_c0_g1	2.8771	17.8453	-2.63286	1.24513e-07	3.75044e-06	down	cd05246, dTDP_GD_SDR_e, dTDP-D-glucose 4,6-dehydratase, extended (e) SDRs. This subgroup contains dTDP-D-glucose 4,6-dehydratase and related proteins, members of the extended-SDR family, with the characteristic Rossmann fold core region, active site tetrad and NAD(P)-binding motif. dTDP-D-glucose 4,6-dehydratase is closely related to other sugar epimerases of the SDR family. dTDP-D-dlucose 4,6,-d…	pfam01370, Epimerase, NAD dependent epimerase/dehydratase family. This family of proteins utilize NAD as a cofactor. The proteins in this family use nucleotide-sugar substrates for a variety of chemical reactions. 2.00e-37	-	KOG0747, KOG0747, KOG0747, Putative NAD+-dependent epimerases [Carbohydrate transport and metabolism]. 1.64e-78	sp|Q9LH76|RHM3_ARATH Trifunctional UDP-glucose 4,6-dehydratase/UDP-4-keto-6-deoxy-D-glucose 3,5-epimerase/UDP-4-keto-L-rhamnose-reductase RHM3 OS=Arabidopsis thaliana GN=RHM3 PE=1 SV=1 1.74e-79	-	XP_019616331.1 PREDICTED: dTDP-D-glucose 4,6-dehydratase-like isoform X1 [Branchiostoma belcheri] 9.58e-77	-
TRINITY_DN12343_c0_g1	16.1168	99.8225	-2.6308	8.32383e-06	0.000154234	down	sd00039, 7WD40, WD40 repeats in seven bladed beta propellers. The WD40 repeat is found in a number of eukaryotic proteins that cover a wide variety of functions including adaptor/regulatory modules in signal transduction, pre-mRNA processing, and cytoskeleton assembly. It typically contains a GH dipeptide 11-24 residues from its N-terminus and the WD dipeptide at its C-terminus and is 40 residues…	-	-	KOG0266, KOG0266, KOG0266, WD40 repeat-containing protein [General function prediction only]. 6.72e-06	sp|O60097|SPT8_SCHPO Transcription factor spt8 OS=Schizosaccharomyces pombe (strain 972 / ATCC 24843) GN=spt8 PE=3 SV=1 1.34e-44	GO:0000122, negative regulation of transcription by RNA polymerase II;GO:0000123, histone acetyltransferase complex;GO:0000124, SAGA complex;GO:0000228, nuclear chromosome;GO:0000785, chromatin;GO:0000790, nuclear chromatin;GO:0003674, molecular_function;GO:0003712, transcription cofactor activity;GO:0005488, binding;GO:0005515, protein binding;GO:0005575, cellular_component;GO:0005622, intracell…	KAJ3010877.1 Transcription factor spt8 [Siphonaria sp. JEL0065] 5.59e-30	-
TRINITY_DN4163_c0_g1	13.8296	85.6445	-2.6306	0.000315565	0.0033068	down	-	-	-	KOG3007, KOG3007, KOG3007, Mu-crystallin [Amino acid transport and metabolism]. 5.04e-14	sp|P53110|YGP9_YEAST Uncharacterized protein YGL159W OS=Saccharomyces cerevisiae (strain ATCC 204508 / S288c) GN=YGL159W PE=1 SV=1 2.50e-24	GO:0003674, molecular_function;GO:0003824, catalytic activity;GO:0005575, cellular_component;GO:0005622, intracellular;GO:0005623, cell;GO:0005737, cytoplasm;GO:0008150, biological_process;GO:0008152, metabolic process;GO:0016491, oxidoreductase activity;GO:0016638, oxidoreductase activity, acting on the CH-NH2 group of donors;GO:0016639, oxidoreductase activity, acting on the CH-NH2 group of don…	XP_043869782.1 ketimine reductase mu-crystallin [Solea senegalensis] >KAG7506895.1 hypothetical protein JOB18_018282 [Solea senegalensis] 3.48e-15	-
TRINITY_DN7844_c0_g1	37.7539	233.699	-2.62995	0.00261078	0.0175957	down	-	pfam12588, PSDC, Phophatidylserine decarboxylase. This domain family is found in bacteria and eukaryotes, and is approximately 140 amino acids in length. The family is found in association with pfam02666. Phosphatidylserine decarboxylase (PSD) is an important enzyme in the synthesis of phosphatidylethanolamine in both prokaryotes and eukaryotes. 1.18e-52	K01613-ko00564 Glycerophospholipid metabolism	KOG2419, KOG2419, KOG2419, Phosphatidylserine decarboxylase [Lipid transport and metabolism]. 1.11e-24	sp|O14111|PSD3_SCHPO Phosphatidylserine decarboxylase proenzyme 3 OS=Schizosaccharomyces pombe (strain 972 / ATCC 24843) GN=psd3 PE=3 SV=2 1.18e-21	-	XP_003389015.1 PREDICTED: uncharacterized protein LOC100636251 [Amphimedon queenslandica] 1.43e-114	-
TRINITY_DN9443_c0_g1	0.89555	5.53635	-2.62809	0.000866582	0.00739766	down	cd07710, arylsulfatase_Sdsa1-like_MBL-fold, Pseudomonas aeruginosa arylsulfatase SdsA1, Pseudomonas sp. DSM6611 arylsulfatase Pisa1, and related proteins; MBL-fold metallo-hydrolase domain. Arylsulfatase (also known as aryl-sulfate sulfohydrolase, EC 3.1.6.1). Pseudomonas aeruginosa SdsA1 is a secreted SDS hydrolase that allows the bacterium to use primary sulfates such as the detergent SDS commo…	pfam14863, Alkyl_sulf_dimr, Alkyl sulfatase dimerization. This domain is found in alkyl sulfatases such as the Pseudomonas aeruginosa SDS hydrolase, where it acts as a dimerization domain. 7.37e-40	-	-	sp|P32717|YJCS_ECOLI Putative alkyl/aryl-sulfatase YjcS OS=Escherichia coli (strain K12) GN=yjcS PE=1 SV=2 5.10e-121	-	MCL4110173.1 hypothetical protein [Idotea baltica] 8.00e-100	-
TRINITY_DN1362_c0_g1	4.29748	26.5509	-2.6272	0.000149086	0.0017661	down	cd05374, 17beta-HSD-like_SDR_c, 17beta hydroxysteroid dehydrogenase-like, classical (c) SDRs. 17beta-hydroxysteroid dehydrogenases are a group of isozymes that catalyze activation and inactivation of estrogen and androgens. SDRs are a functionally diverse family of oxidoreductases that have a single domain with a structurally conserved Rossmann fold (alpha/beta folding pattern with a central beta…	pfam00106, adh_short, short chain dehydrogenase. This family contains a wide variety of dehydrogenases. 1.19e-13	-	KOG4169, KOG4169, KOG4169, 15-hydroxyprostaglandin dehydrogenase and related dehydrogenases [Lipid transport and metabolism, General function prediction only]. 6.97e-13	sp|O31680|YKVO_BACSU Uncharacterized oxidoreductase YkvO OS=Bacillus subtilis (strain 168) GN=ykvO PE=3 SV=1 3.72e-15	-	CAF0861562.1 unnamed protein product [Adineta ricciae] >CAF1186862.1 unnamed protein product [Adineta ricciae] 1.10e-42	-
TRINITY_DN13726_c4_g1	17.8068	109.891	-2.62557	0.00043834	0.00433936	down	cd03792, GT4_trehalose_phosphorylase, trehalose phosphorylase and similar proteins. Trehalose phosphorylase (TP) reversibly catalyzes trehalose synthesis and degradation from alpha-glucose-1-phosphate (alpha-Glc-1-P) and glucose. The catalyzing activity includes the phosphorolysis of trehalose, which produce alpha-Glc-1-P and glucose, and the subsequent synthesis of trehalose. This family is most…	-	-	-	sp|O75003|TREPH_GRIFR Trehalose phosphorylase OS=Grifola frondosa PE=1 SV=1 3.82e-18	-	-	-
TRINITY_DN13731_c0_g1	3.32555	20.4489	-2.62036	3.1334e-05	0.000476989	down	cd17502, MFS_Azr1_MDR_like, Saccharomyces cerevisiae Azole resistance protein 1 (Azr1p), and similar multidrug resistance (MDR) transporters of the Major Facilitator Superfamily. This subfamily is composed of multidrug resistance (MDR) transporters including various Saccharomyces cerevisiae proteins such as azole resistance protein 1 (Azr1p), vacuolar basic amino acid transporter 1 (Vba1p), vacuo…	-	-	-	sp|Q10072|YAN6_SCHPO Uncharacterized transporter C3H1.06c OS=Schizosaccharomyces pombe (strain 972 / ATCC 24843) GN=SPAC3H1.06c PE=3 SV=1 8.07e-10	-	KAJ3016809.1 hypothetical protein HDU68_012013 [Siphonaria sp. JEL0065] 2.42e-10	-
TRINITY_DN14602_c0_g1	6.7151	41.1766	-2.61634	0.000418494	0.00418198	down	-	-	-	-	-	-	-	-
TRINITY_DN18497_c0_g1	0.368992	2.2604	-2.61492	0.00861611	0.0437413	down	-	-	-	-	-	-	-	-
TRINITY_DN10074_c0_g1	1.58061	9.67893	-2.61437	0.000828977	0.00721227	down	-	-	-	-	-	-	-	-
TRINITY_DN10400_c0_g1	0.6756	4.13396	-2.61328	0.00714275	0.0379563	down	-	-	-	-	-	-	-	-
TRINITY_DN13841_c3_g2	2.96414	18.0965	-2.61002	0.000228281	0.0025254	down	-	pfam18922, DUF5672, Protein of unknown function (DUF5672). This family of proteins is functionally uncharacterized. This family of proteins is found in bacteria, archaea, eukaryotes and viruses. Proteins in this family are typically between 260 and 408 amino acids in length. This entry corresponds to a region of about 200 amino acids in length with multiple conserved motifs. There are two conserv…	-	-	-	-	CAF1137194.1 unnamed protein product [Rotaria magnacalcarata] >CAF1564152.1 unnamed protein product [Rotaria magnacalcarata] >CAF2078053.1 unnamed protein product [Rotaria magnacalcarata] >CAF4886345.1 unnamed protein product [Rotaria magnacalcarata] >CAF4965693.1 unnamed protein product [Rotaria magnacalcarata] 6.59e-20	-
TRINITY_DN12214_c0_g1	6.36581	38.7843	-2.60706	2.8281e-05	0.000435733	down	-	-	-	-	sp|Q8EPF5|IF3_OCEIH Translation initiation factor IF-3 OS=Oceanobacillus iheyensis (strain DSM 14371 / JCM 11309 / KCTC 3954 / HTE831) GN=infC PE=3 SV=2 7.60e-07	-	-	-
TRINITY_DN13164_c0_g1	0.875555	5.33134	-2.60623	0.000183329	0.00209747	down	cd17356, MFS_HXT, Fungal Hexose transporter subfamily of the Major Facilitator Superfamily of transporters and similar proteins. The fungal hexose transporter (HXT) subfamily is comprised of functionally redundant proteins that function mainly in the transport of glucose, as well as other sugars such as galactose and fructose. Saccharomyces cerevisiae has 20 genes that encode proteins in this fam…	pfam00083, Sugar_tr, Sugar (and other) transporter. 8.91e-16	-	KOG0254, KOG0254, KOG0254, Predicted transporter (major facilitator superfamily) [General function prediction only]. 1.83e-13	sp|P38156|MAL31_YEAST Maltose permease MAL31 OS=Saccharomyces cerevisiae (strain ATCC 204508 / S288c) GN=MAL31 PE=1 SV=1 2.19e-31	-	XP_022255336.1 proton myo-inositol cotransporter-like [Limulus polyphemus] 2.03e-16	-
TRINITY_DN9744_c0_g1	2.26166	13.7254	-2.60139	7.77055e-06	0.000145204	down	-	-	-	-	sp|Q00808|HETE1_PODAS Vegetative incompatibility protein HET-E-1 OS=Podospora anserina GN=HET-E1 PE=3 SV=1 1.27e-51	-	CAF1317610.1 unnamed protein product [Rotaria sp. Silwood1] 2.01e-07	-
TRINITY_DN15090_c0_g1	3.29055	19.9683	-2.60131	0.00254825	0.0173491	down	-	-	-	-	-	-	-	-
TRINITY_DN12664_c0_g1	48.1887	292.405	-2.6012	0.00024863	0.00271041	down	cd13866, CuRO_2_BOD, The second cupredoxin domain of Bilirubin oxidase (BOD). Bilirubin oxidase (BOD) catalyzes the oxidation of bilirubin to biliverdin and the four-electron reduction of molecular oxygen to water. It is used in diagnosing jaundice through the determination of bilirubin in serum. BOD is a member of the multicopper oxidase (MCO) family that also includes laccase, ascorbate oxidase…	pfam07732, Cu-oxidase_3, Multicopper oxidase. This entry contains many divergent copper oxidase-like domains that are not recognized by the pfam00394 model. 1.42e-10	-	KOG1263, KOG1263, KOG1263, Multicopper oxidases [Secondary metabolites biosynthesis, transport and catabolism]. 7.97e-09	sp|Q12737|BLRO_MYRVE Bilirubin oxidase OS=Myrothecium verrucaria PE=1 SV=1 0.0	-	CAF1487125.1 unnamed protein product [Adineta ricciae] 1.51e-64	-
TRINITY_DN12292_c0_g1	4.28909	26.0127	-2.60047	1.80177e-05	0.000298208	down	-	pfam03663, Glyco_hydro_76, Glycosyl hydrolase family 76. Family of alpha-1,6-mannanases. 2.05e-20	-	-	sp|Q5ACZ2|DFG5_CANAL Mannan endo-1,6-alpha-mannosidase DFG5 OS=Candida albicans (strain SC5314 / ATCC MYA-2876) GN=DFG5 PE=1 SV=1 4.56e-16	-	ODM94048.1 Mannan endo-1,6-alpha-mannosidase DFG5 [Orchesella cincta] 1.79e-69	-
TRINITY_DN12281_c0_g1	1.86451	11.3038	-2.59994	9.57985e-05	0.00121824	down	-	pfam00324, AA_permease, Amino acid permease. 2.41e-67	-	KOG1286, KOG1286, KOG1286, Amino acid transporters [Amino acid transport and metabolism]. 1.90e-81	sp|P43548|AGP3_YEAST General amino acid permease AGP3 OS=Saccharomyces cerevisiae (strain ATCC 204508 / S288c) GN=AGP3 PE=1 SV=1 0.0	GO:0003333, amino acid transmembrane transport;GO:0003674, molecular_function;GO:0005215, transporter activity;GO:0005342, organic acid transmembrane transporter activity;GO:0005575, cellular_component;GO:0005622, intracellular;GO:0005623, cell;GO:0005737, cytoplasm;GO:0005783, endoplasmic reticulum;GO:0005886, plasma membrane;GO:0006810, transport;GO:0006811, ion transport;GO:0006812, cation tra…	CAF1141514.1 unnamed protein product [Adineta steineri] >CAF3997107.1 unnamed protein product [Adineta steineri] 2.67e-155	-
TRINITY_DN14264_c0_g2	14.406	86.945	-2.59344	9.57602e-05	0.00121824	down	cd01285, nucleoside_deaminase, Nucleoside deaminases include adenosine, guanine and cytosine deaminases. These enzymes are Zn dependent and catalyze the deamination of nucleosides. The zinc ion in the active site plays a central role in the proposed catalytic mechanism, activating a water molecule to form a hydroxide ion that performs a nucleophilic attack on the substrate. The functional enzyme …	-	-	-	sp|O59834|FCYS_SCHPO Probable cytosine deaminase OS=Schizosaccharomyces pombe (strain 972 / ATCC 24843) GN=SPCC965.14c PE=3 SV=1 1.10e-09	-	CAF1009854.1 unnamed protein product [Rotaria sordida] >CAF4221850.1 unnamed protein product [Rotaria sordida] 3.17e-31	-
TRINITY_DN5176_c0_g1	1.44579	8.69272	-2.58795	0.00434866	0.0260489	down	-	-	-	KOG0768, KOG0768, KOG0768, Mitochondrial carrier protein PET8 [Energy production and conversion]. 4.60e-39	sp|Q4V9P0|SAMC_DANRE S-adenosylmethionine mitochondrial carrier protein OS=Danio rerio GN=slc25a26 PE=2 SV=1 1.66e-39	-	XP_041348608.1 S-adenosylmethionine mitochondrial carrier protein-like [Gigantopelta aegis] 8.80e-43	-
TRINITY_DN13984_c0_g7	33.8984	203.692	-2.5871	7.25243e-06	0.000135967	down	-	-	-	-	-	-	-	-
TRINITY_DN13952_c1_g2	2.77407	16.6298	-2.58369	0.000393921	0.00398024	down	-	-	-	-	-	-	-	-
TRINITY_DN13263_c0_g1	139.894	838.453	-2.58339	0.00045715	0.00447332	down	-	-	-	-	-	-	-	-
TRINITY_DN9577_c0_g1	1.67634	9.98435	-2.57436	0.00539051	0.0306709	down	-	-	-	-	-	-	-	-
TRINITY_DN10553_c0_g1	4.3286	25.7664	-2.57352	1.71241e-05	0.000285274	down	-	-	-	-	-	GO:0000976, transcription regulatory region sequence-specific DNA binding;GO:0000977, RNA polymerase II regulatory region sequence-specific DNA binding;GO:0000978, RNA polymerase II proximal promoter sequence-specific DNA binding;GO:0000981, RNA polymerase II transcription factor activity, sequence-specific DNA binding;GO:0000982, transcription factor activity, RNA polymerase II proximal promoter…	-	-
TRINITY_DN13393_c0_g1	2.14954	12.789	-2.57281	9.18921e-05	0.00117627	down	-	-	-	-	-	-	-	-
TRINITY_DN12984_c0_g1	2.83404	16.8382	-2.57081	0.00249777	0.0170878	down	-	pfam01593, Amino_oxidase, Flavin containing amine oxidoreductase. This family consists of various amine oxidases, including maze polyamine oxidase (PAO) and various flavin containing monoamine oxidases (MAO). The aligned region includes the flavin binding site of these enzymes. The family also contains phytoene dehydrogenases and related enzymes. In vertebrates MAO plays an important role regulat…	-	KOG0029, KOG0029, KOG0029, Amine oxidase [Secondary metabolites biosynthesis, transport and catabolism]. 1.03e-06	sp|O34363|YOBN_BACSU Putative L-amino-acid oxidase YobN OS=Bacillus subtilis (strain 168) GN=yobN PE=3 SV=3 3.39e-48	-	RDD39479.1 putative L-amino-acid oxidase YobN [Trichoplax sp. H2] 4.26e-64	-
TRINITY_DN9763_c0_g1	3.13601	18.6081	-2.56893	7.43921e-05	0.000986025	down	-	-	-	-	-	-	-	-
TRINITY_DN12421_c0_g1	5.19291	30.7963	-2.56814	2.88839e-06	6.06511e-05	down	-	-	-	-	sp|P38680|MTR_NEUCR N amino acid transport system protein OS=Neurospora crassa (strain ATCC 24698 / 74-OR23-1A / CBS 708.71 / DSM 1257 / FGSC 987) GN=mtr PE=3 SV=2 4.36e-39	-	-	-
TRINITY_DN11615_c0_g1	8.0491	47.5522	-2.56261	0.000134404	0.00161255	down	-	-	-	-	-	-	-	-
TRINITY_DN11134_c0_g1	0.869765	5.13404	-2.5614	0.0045467	0.0269557	down	-	-	-	KOG1558, KOG1558, KOG1558, Fe2+/Zn2+ regulated transporter [Inorganic ion transport and metabolism]. 4.90e-10	sp|Q12436|ZRT2_YEAST Zinc-regulated transporter 2 OS=Saccharomyces cerevisiae (strain ATCC 204508 / S288c) GN=ZRT2 PE=1 SV=1 1.57e-25	-	CAF3489208.1 unnamed protein product [Rotaria socialis] >CAF3624100.1 unnamed protein product [Rotaria socialis] >CAF3625735.1 unnamed protein product [Rotaria socialis] >CAF4552876.1 unnamed protein product [Rotaria socialis] >CAF4634781.1 unnamed protein product [Rotaria socialis] 8.16e-16	-
TRINITY_DN1956_c0_g1	0.839715	4.94772	-2.55879	0.00718755	0.0381147	down	-	-	-	-	-	-	-	-
TRINITY_DN14168_c0_g5	4.17801	24.5768	-2.55641	8.45139e-05	0.00109172	down	-	-	-	KOG0322, KOG0322, KOG0322, G-protein beta subunit-like protein GNB1L, contains WD repeats [General function prediction only]. 3.61e-22	sp|A7UWE6|ASA1_NEUCR ASTRA-associated protein 1 OS=Neurospora crassa (strain ATCC 24698 / 74-OR23-1A / CBS 708.71 / DSM 1257 / FGSC 987) GN=asa-1 PE=3 SV=1 1.79e-149	GO:0000228, nuclear chromosome;GO:0000785, chromatin;GO:0000790, nuclear chromatin;GO:0005575, cellular_component;GO:0005622, intracellular;GO:0005623, cell;GO:0005634, nucleus;GO:0005694, chromosome;GO:0006325, chromatin organization;GO:0006338, chromatin remodeling;GO:0006996, organelle organization;GO:0008150, biological_process;GO:0009987, cellular process;GO:0016043, cellular component organ…	XP_038665480.1 guanine nucleotide-binding protein subunit beta-like protein 1 [Scyliorhinus canicula] >XP_038665573.1 guanine nucleotide-binding protein subunit beta-like protein 1 [Scyliorhinus canicula] 5.41e-22	-
TRINITY_DN2996_c0_g1	5.81248	34.1159	-2.55322	0.000855458	0.00735798	down	-	-	-	-	-	-	-	-
TRINITY_DN12155_c0_g2	1.08173	6.33688	-2.55043	0.00168368	0.0126038	down	-	-	-	-	-	-	-	-
TRINITY_DN746_c0_g1	1.20417	7.04452	-2.54846	0.00184778	0.013531	down	cd02801, DUS_like_FMN, Dihydrouridine synthase-like (DUS-like) FMN-binding domain. Members of this family catalyze the reduction of the 5,6-double bond of a uridine residue on tRNA. Dihydrouridine modification of tRNA is widely observed in prokaryotes and eukaryotes, and also in some archaea. Most dihydrouridines are found in the D loop of t-RNAs. The role of dihydrouridine in tRNA is currently u…	pfam01207, Dus, Dihydrouridine synthase (Dus). Members of this family catalyze the reduction of the 5,6-double bond of a uridine residue on tRNA. Dihydrouridine modification of tRNA is widely observed in prokaryotes and eukaryotes, and also in some archae. Most dihydrouridines are found in the D loop of t-RNAs. The role of dihydrouridine in tRNA is currently unknown, but may increase conformation…	-	KOG2335, KOG2335, KOG2335, tRNA-dihydrouridine synthase [Translation, ribosomal structure and biogenesis]. 4.68e-43	sp|O95620|DUS4L_HUMAN tRNA-dihydrouridine(20a/20b) synthase [NAD(P)+]-like OS=Homo sapiens GN=DUS4L PE=2 SV=2 2.63e-54	GO:0002943, tRNA dihydrouridine synthesis;GO:0003674, molecular_function;GO:0003824, catalytic activity;GO:0006139, nucleobase-containing compound metabolic process;GO:0006396, RNA processing;GO:0006399, tRNA metabolic process;GO:0006400, tRNA modification;GO:0006725, cellular aromatic compound metabolic process;GO:0006807, nitrogen compound metabolic process;GO:0008033, tRNA processing;GO:000815…	NXA51355.1 DUS4L synthase [Nothocercus julius] 3.71e-52	-
TRINITY_DN10960_c0_g1	3.29974	19.2686	-2.54583	4.03196e-05	0.000585717	down	-	-	-	-	-	-	-	-
TRINITY_DN14005_c2_g7	9.24408	53.9799	-2.54582	0.00187802	0.0136487	down	cd19147, AKR_AKR9A3_9B1-4, Phanerochaete chrysosporium aryl-alcohol dehydrogenase [NADP(+)] (AAD) and similar proteins. Phanerochaete chrysosporium ADD (EC1.1.1.91) is a founding member of aldo-keto reductase family 9 member A3. It is involved in lignin degradation and reduces aromatic benzaldehydes to their respective alcohols in the presence of NADP(H). This family also includes Saccharomyces c…	pfam00248, Aldo_ket_red, Aldo/keto reductase family. This family includes a number of K+ ion channel beta chain regulatory domains - these are reported to have oxidoreductase activity. 1.05e-10	-	KOG1575, KOG1575, KOG1575, Voltage-gated shaker-like K+ channel, subunit beta/KCNAB [Energy production and conversion]. 2.58e-14	sp|Q00258|NORA_ASPPA Norsolorinic acid reductase A OS=Aspergillus parasiticus GN=norA PE=3 SV=1 6.72e-07	-	CAF1377507.1 unnamed protein product [Rotaria sp. Silwood1] >CAF3559042.1 unnamed protein product [Rotaria sp. Silwood1] >CAF3564159.1 unnamed protein product [Rotaria sp. Silwood1] >CAF3793848.1 unnamed protein product [Rotaria sp. Silwood1] >CAF4624531.1 unnamed protein product [Rotaria sp. Silwood1] 2.11e-114	-
TRINITY_DN7223_c0_g1	1.8987	11.0671	-2.54319	0.000237611	0.00260557	down	-	pfam06985, HET, Heterokaryon incompatibility protein (HET). This family represents a conserved region approximately 150 residues long within various heterokaryon incompatibility proteins that seem to be restricted to ascomycete fungi. Genetic differences in specific het genes prevent a viable heterokaryotic fungal cell from being formed by the fusion of filaments from two different wild-type stra…	-	-	-	-	KAI1693513.1 heterokaryon incompatibility protein (HET) domain-containing protein [Ditylenchus destructor] 6.49e-27	-
TRINITY_DN6733_c0_g1	0.723075	4.21412	-2.54302	0.00379903	0.0234529	down	-	pfam00732, GMC_oxred_N, GMC oxidoreductase. This family of proteins bind FAD as a cofactor. 4.25e-12	-	KOG1238, KOG1238, KOG1238, Glucose dehydrogenase/choline dehydrogenase/mandelonitrile lyase (GMC oxidoreductase family) [General function prediction only]. 1.86e-30	sp|B6I074|BETA_ECOSE Oxygen-dependent choline dehydrogenase OS=Escherichia coli (strain SE11) GN=betA PE=3 SV=1 8.15e-53	-	GAA57939.1 choline dehydrogenase [Clonorchis sinensis] 1.24e-51	-
TRINITY_DN9749_c0_g1	7.10581	41.327	-2.54001	0.00100602	0.00832523	down	-	-	-	KOG1515, KOG1515, KOG1515, Arylacetamide deacetylase [Defense mechanisms]. 1.48e-07	sp|B5BLW5|ARE_SULSF Arylesterase OS=Sulfolobus solfataricus GN=are PE=1 SV=1 5.90e-09	-	UJR16693.1 hypothetical protein I4U23_003593 [Adineta vaga] 2.62e-13	-
TRINITY_DN14144_c4_g5	7.70478	44.8105	-2.54001	4.35614e-06	8.67609e-05	down	-	-	-	-	-	-	-	-
TRINITY_DN14283_c2_g3	1.05744	6.13646	-2.53683	0.000477519	0.00463694	down	-	-	-	-	-	-	-	-
TRINITY_DN7765_c0_g2	1.99759	11.5915	-2.53673	0.000292627	0.00311001	down	-	-	-	-	-	-	-	-
TRINITY_DN12511_c0_g1	1.83022	10.5953	-2.53334	0.00370956	0.0229899	down	cd17323, MFS_Tpo1_MDR_like, Yeast Polyamine transporter 1 (Tpo1) and similar multidrug resistance (MDR) transporters of the Major Facilitator Superfamily. This family is composed of fungal multidrug resistance (MDR) transporters including several proteins from Saccharomyces cerevisiae such as polyamine transporters 1-4 (Tpo1-4), quinidine resistance proteins 1-3 (Qdr1-3), dityrosine transporter 1…	pfam01095, Pectinesterase, Pectinesterase. 2.36e-12	-	KOG0255, KOG0255, KOG0255, Synaptic vesicle transporter SVOP and related transporters (major facilitator superfamily) [General function prediction only]. 7.28e-07	sp|P53389|HOL1_YEAST Protein HOL1 OS=Saccharomyces cerevisiae (strain ATCC 204508 / S288c) GN=HOL1 PE=1 SV=1 1.22e-43	-	CAH0394131.1 unnamed protein product [Bemisia tabaci] 1.55e-08	-
TRINITY_DN8610_c0_g1	2.83692	16.3914	-2.53054	0.00157749	0.0120213	down	-	-	-	-	-	-	-	-
TRINITY_DN1589_c0_g1	0.931688	5.37804	-2.52916	0.000356735	0.00365977	down	cd12148, fungal_TF_MHR, fungal transcription factor regulatory middle homology region. This domain is present in the large family of fungal zinc cluster transcription factors that contain an N-terminal GAL4-like C6 zinc binuclear cluster DNA-binding domain. Examples of members of this large fungal group are the following Saccharomyces cerevisiae transcription factors, GAL4, STB5, DAL81, CAT8, RDR…	-	-	-	-	-	-	-
TRINITY_DN6454_c0_g1	2.09085	12.0378	-2.52542	0.00059406	0.005536	down	-	pfam09994, DUF2235, Uncharacterized alpha/beta hydrolase domain (DUF2235). This domain, found in various hypothetical bacterial proteins, has no known function. 3.03e-07	-	-	sp|P39992|YEC3_YEAST Uncharacterized protein YEL023C OS=Saccharomyces cerevisiae (strain ATCC 204508 / S288c) GN=YEL023C PE=4 SV=1 3.48e-11	-	KAJ3003805.1 hypothetical protein HDU68_005497 [Siphonaria sp. JEL0065] 4.41e-16	-
TRINITY_DN12362_c0_g1	4.51768	25.8585	-2.51698	0.000110998	0.00137247	down	-	pfam09424, YqeY, Yqey-like protein. The function of this domain found in the YqeY protein is uncertain. 3.41e-14	-	-	sp|B2WMX8|AIM41_PYRTR Altered inheritance of mitochondria protein 41, mitochondrial OS=Pyrenophora tritici-repentis (strain Pt-1C-BFP) GN=AIM41 PE=3 SV=1 1.86e-20	-	MCL4157335.1 hypothetical protein [Idotea baltica] 4.40e-10	-
TRINITY_DN10325_c0_g1	1.18826	6.79104	-2.51478	0.00388893	0.0238803	down	-	pfam00933, Glyco_hydro_3, Glycosyl hydrolase family 3 N terminal domain. 8.90e-27	K05349-ko00500 Starch and sucrose metabolism;ko00940 Phenylpropanoid biosynthesis;ko00460 Cyanoamino acid metabolism	-	sp|Q5BFG8|BGLB_EMENI Beta-glucosidase B OS=Emericella nidulans (strain FGSC A4 / ATCC 38163 / CBS 112.46 / NRRL 194 / M139) GN=bglB PE=1 SV=1 9.77e-179	-	MCL4141981.1 hypothetical protein [Idotea baltica] 2.52e-60	-
TRINITY_DN7592_c0_g1	300.002	1712.14	-2.51276	2.07176e-05	0.000333278	down	-	-	-	-	-	-	-	-
TRINITY_DN14294_c2_g2	11.1391	63.4973	-2.51106	2.6168e-05	0.000408627	down	cd14474, SPX_YDR089W, SPX domain of the yeast protein YDR089W and related proteins. This region has been named the SPX domain after (Syg1, Pho81 and XPR1). The domain is found at the amino terminus of a variety of proteins. The uncharacterized yeast protein YDR089W has not been shown to be involved in phosphate homeostasis, in contrast to most of the other SPX-domain containing proteins. 4.66e-34	-	-	-	-	-	-	-
TRINITY_DN12776_c0_g1	5.27281	29.9646	-2.50661	0.00747205	0.0391982	down	cd19131, AKR_AKR5C2, Escherichia coli 2,5-diketo-D-gluconic acid reductase A (DkgA/YqhE) and similar proteins. Escherichia coli DkgA/YqhE is a founding member of aldo-keto reductase family 5 member C2 (AKR5C2). DkgA/YqhE (EC 1.1.1.274), also called 2,5-DKG reductase A, or 2,5-DKGR A, or 25DKGR-A, or AKR5C, catalyzes the reduction of 2,5-diketo-D-gluconic acid (25DKG) to 2-keto-L-gulonic acid (2KL…	pfam00248, Aldo_ket_red, Aldo/keto reductase family. This family includes a number of K+ ion channel beta chain regulatory domains - these are reported to have oxidoreductase activity. 5.88e-26	-	KOG1577, KOG1577, KOG1577, Aldo/keto reductase family proteins [General function prediction only]. 2.29e-60	sp|O14088|YER5_SCHPO Uncharacterized oxidoreductase C2F3.05c OS=Schizosaccharomyces pombe (strain 972 / ATCC 24843) GN=SPAC2F3.05c PE=3 SV=1 1.45e-60	-	XP_020628763.1 uncharacterized protein LOC110065917 [Orbicella faveolata] 1.07e-61	-
TRINITY_DN12755_c0_g1	3.22525	18.3023	-2.50454	0.00185734	0.0135604	down	cd09317, TDT_Mae1_like, C4-dicarboxylate transporter/malic acid transport protein family includes Mae1. This family contains eukaryotic homologs of C4-dicarboxylate transporter/malic acid transport proteins which are part of the Tellurite-resistance/Dicarboxylate Transporter (TDT) family. This includes the MAE1 gene in Schizosaccharomyces pombe gene that encodes malate permease, Mae1, which funct…	pfam03595, SLAC1, Voltage-dependent anion channel. This family of transporters has ten alpha helical transmembrane segments. The structure of a bacterial homolog of SLAC1 shows it to have a trimeric arrangement. The pore is composed of five helices with a conserved Phe residue involved in gating. One homolog, Mae1 from the yeast Schizosaccharomyces pombe, functions as a malate uptake transporter;…	-	-	sp|O59815|MAE2_SCHPO Putative malic acid transport protein OS=Schizosaccharomyces pombe (strain 972 / ATCC 24843) GN=SPCC794.06 PE=3 SV=1 1.07e-09	GO:0003674, molecular_function;GO:0005215, transporter activity;GO:0005310, dicarboxylic acid transmembrane transporter activity;GO:0005342, organic acid transmembrane transporter activity;GO:0005575, cellular_component;GO:0006810, transport;GO:0006811, ion transport;GO:0006812, cation transport;GO:0006820, anion transport;GO:0006835, dicarboxylic acid transport;GO:0006855, drug transmembrane tra…	UJR11864.1 hypothetical protein I4U23_016043 [Adineta vaga] 1.95e-49	-
TRINITY_DN13929_c3_g4	5.77142	32.7468	-2.50436	0.00229424	0.0159135	down	-	-	-	-	-	-	-	-
TRINITY_DN11425_c0_g1	4.3919	24.9111	-2.50387	2.73414e-05	0.000424343	down	cd02023, UMPK, Uridine monophosphate kinase (UMPK, EC 2.7.1.48), also known as uridine kinase or uridine-cytidine kinase (UCK), catalyzes the reversible phosphoryl transfer from ATP to uridine or cytidine to yield UMP or CMP. In the primidine nucleotide-salvage pathway, this enzyme combined with nucleoside diphosphate kinases further phosphorylates UMP and CMP to form UTP and CTP. This kinase als…	pfam14681, UPRTase, Uracil phosphoribosyltransferase. This family includes the enzyme uracil phosphoribosyltransferase (EC:2.4.2.9). This enzyme catalyzes the first step of UMP biosynthesis. 2.55e-33	K00876-ko00240 Pyrimidine metabolism;ko00983 Drug metabolism - other enzymes	KOG4203, KOG4203, KOG4203, Armadillo/beta-Catenin/plakoglobin [Signal transduction mechanisms, Cytoskeleton]. 1.04e-76	sp|Q91YL3|UCKL1_MOUSE Uridine-cytidine kinase-like 1 OS=Mus musculus GN=Uckl1 PE=1 SV=1 4.41e-93	GO:0003674, molecular_function;GO:0003824, catalytic activity;GO:0004845, uracil phosphoribosyltransferase activity;GO:0004849, uridine kinase activity;GO:0005575, cellular_component;GO:0005622, intracellular;GO:0005623, cell;GO:0005634, nucleus;GO:0005737, cytoplasm;GO:0005829, cytosol;GO:0006139, nucleobase-containing compound metabolic process;GO:0006206, pyrimidine nucleobase metabolic proces…	XP_051887199.1 uridine-cytidine kinase-like 1 isoform X4 [Pristis pectinata] 2.27e-110	-
TRINITY_DN9828_c0_g1	16.9403	95.5225	-2.49538	0.00174373	0.0129693	down	cd11061, CYP67-like, cytochrome P450 family 67 and similar cytochrome P450s. This subfamily includes Uromyces viciae-fabae cytochrome P450 67 (CYP67), also called planta-induced rust protein 16, Cystobasidium minutum (Rhodotorula minuta) cytochrome P450rm, and other fungal cytochrome P450s. P450rm catalyzes the formation of isobutene and 4-hydroxylation of benzoate. The gene encoding CYP67 is a p…	pfam00067, p450, Cytochrome P450. Cytochrome P450s are haem-thiolate proteins involved in the oxidative degradation of various compounds. They are particularly well known for their role in the degradation of environmental toxins and mutagens. They can be divided into 4 classes, according to the method by which electrons from NAD(P)H are delivered to the catalytic site. Sequence conservation is re…	K07824-ko00627 Aminobenzoate degradation;ko00362 Benzoate degradation;ko01220 Degradation of aromatic compounds	KOG0157, KOG0157, KOG0157, Cytochrome P450 CYP4/CYP19/CYP26 subfamilies [Secondary metabolites biosynthesis, transport and catabolism, Lipid transport and metabolism]. 2.33e-19	sp|P17549|CP53_ASPNG Benzoate 4-monooxygenase OS=Aspergillus niger GN=bphA PE=1 SV=1 1.80e-159	-	XP_037037647.1 benzoate 4-monooxygenase-like [Bradysia coprophila] 8.55e-159	-
TRINITY_DN12990_c0_g1	1.59386	8.98432	-2.49488	0.000861084	0.00736982	down	-	-	-	-	-	-	-	-
TRINITY_DN23173_c0_g1	2.13236	12.0193	-2.49484	0.00762544	0.0398384	down	-	-	-	-	sp|D7UQ40|SOL5_ALTSO Bifunctional solanapyrone synthase OS=Alternaria solani GN=sol5 PE=1 SV=1 4.79e-36	-	CAF1458487.1 unnamed protein product [Adineta ricciae] 1.13e-42	-
TRINITY_DN14309_c2_g6	1.27942	7.20439	-2.49338	0.00190782	0.0137708	down	cd09870, PIN_YEN1, FEN-like PIN domains of Saccharomyces cerevisiae endonuclease 1 (YEN1), Chaetomium thermophilum junction-resolving enzyme GEN1, and fungal homologs. Fungal Endonuclease 1 (YEN1 and GEN1, GEN1 is known as YEN1 in Saccharomyces cerevisiae) is a four-way (Holliday) junction resolvase. Members of this subgroup belong to the structure-specific, 5' nuclease family (FEN-like) that cat…	pfam18380, GEN1_C, Holliday junction resolvase Gen1 C-terminal domain. This is the C-terminal domain found in GEN1 resolvase. It is composed of three-strand antiparallel beta sheets and four alpha helices. GEN1 protein, a member of the XPG/Rad2 family of structure-selective endonucleases, is specialized for the cleavage of Holliday junction recombination intermediates. Structural comparison indic…	-	KOG2520, KOG2520, KOG2520, 5'-3' exonuclease [Replication, recombination and repair]. 6.14e-22	sp|Q17RS7|GEN_HUMAN Flap endonuclease GEN homolog 1 OS=Homo sapiens GN=GEN1 PE=1 SV=2 5.81e-16	-	OWF56582.1 Flap endonuclease GEN-like 1 [Mizuhopecten yessoensis] 5.82e-22	-
TRINITY_DN9994_c0_g1	4.05046	22.7929	-2.49242	0.00060417	0.00562196	down	cd01838, Isoamyl_acetate_hydrolase_like, Isoamyl-acetate hydrolyzing esterase-like proteins. SGNH_hydrolase subfamily similar to the Saccharomyces cerevisiae IAH1. IAH1 may be the major esterase that hydrolyses isoamyl acetate in sake mash. The SGNH-family of hydrolases is a diverse family of lipases and esterases. The tertiary fold of the enzyme is substantially different from that of the alpha/…	-	-	KOG3035, KOG3035, KOG3035, Isoamyl acetate-hydrolyzing esterase [Lipid transport and metabolism]. 8.99e-18	sp|Q3SZ16|IAH1_BOVIN Isoamyl acetate-hydrolyzing esterase 1 homolog OS=Bos taurus GN=IAH1 PE=2 SV=1 3.09e-11	-	-	-
TRINITY_DN3574_c0_g1	2.35166	13.2287	-2.49193	3.71432e-05	0.000548347	down	-	-	-	-	sp|Q05958|ECM22_YEAST Sterol regulatory element-binding protein ECM22 OS=Saccharomyces cerevisiae (strain ATCC 204508 / S288c) GN=ECM22 PE=1 SV=1 2.13e-06	-	-	-
TRINITY_DN14197_c1_g1	39.7183	223.16	-2.4902	0.000426465	0.00424827	down	cd06454, KBL_like, KBL_like; this family belongs to the pyridoxal phosphate (PLP)-dependent aspartate aminotransferase superfamily (fold I). The major groups in this CD corresponds to serine palmitoyltransferase (SPT), 5-aminolevulinate synthase (ALAS), 8-amino-7-oxononanoate synthase (AONS), and 2-amino-3-ketobutyrate CoA ligase (KBL). SPT is responsible for the condensation of L-serine with pal…	-	-	KOG1358, KOG1358, KOG1358, Serine palmitoyltransferase [Posttranslational modification, protein turnover, chaperones]. 9.94e-81	sp|O59682|LCB1_SCHPO Serine palmitoyltransferase 1 OS=Schizosaccharomyces pombe (strain 972 / ATCC 24843) GN=lcb1 PE=3 SV=1 1.77e-18	GO:0000003, reproduction;GO:0000322, storage vacuole;GO:0000323, lytic vacuole;GO:0000324, fungal-type vacuole;GO:0000746, conjugation;GO:0000747, conjugation with cellular fusion;GO:0003674, molecular_function;GO:0003676, nucleic acid binding;GO:0003723, RNA binding;GO:0003729, mRNA binding;GO:0003824, catalytic activity;GO:0004553, hydrolase activity, hydrolyzing O-glycosyl compounds;GO:0005488…	KAJ3030318.1 serine palmitoyltransferase component [Siphonaria sp. JEL0065] 6.16e-59	-
TRINITY_DN4358_c0_g1	5.86741	32.92	-2.48817	0.000107989	0.0013431	down	-	pfam00300, His_Phos_1, Histidine phosphatase superfamily (branch 1). The histidine phosphatase superfamily is so named because catalysis centers on a conserved His residue that is transiently phosphorylated during the catalytic cycle. Other conserved residues contribute to a 'phosphate pocket' and interact with the phospho group of substrate before, during and after its transfer to the His residu…	-	KOG4754, KOG4754, KOG4754, Predicted phosphoglycerate mutase [Carbohydrate transport and metabolism]. 1.41e-06	sp|Q9FGF0|PGML1_ARATH Phosphoglycerate mutase-like protein 1 OS=Arabidopsis thaliana GN=At5g64460 PE=2 SV=1 1.00e-07	-	-	-
TRINITY_DN11266_c0_g1	0.684	3.83735	-2.48804	0.00331329	0.0210892	down	cd01301, rDP_like, renal dipeptidase (rDP), best studied in mammals and also called membrane or microsomal dipeptidase, is a membrane-bound glycoprotein hydrolyzing dipeptides and is involved in hydrolytic metabolism of penem and carbapenem beta-lactam antibiotics. Although the biological function of the enzyme is still unknown, it has been suggested to play a role in the renal glutathione metabo…	pfam01244, Peptidase_M19, Membrane dipeptidase (Peptidase family M19). 9.17e-77	-	KOG4127, KOG4127, KOG4127, Renal dipeptidase [Posttranslational modification, protein turnover, chaperones]. 4.66e-87	sp|C5FK77|DPEP1_ARTOC Putative dipeptidase MCYG_02918 OS=Arthroderma otae (strain ATCC MYA-4605 / CBS 113480) GN=MCYG_02918 PE=3 SV=1 6.30e-97	GO:0000976, transcription regulatory region sequence-specific DNA binding;GO:0000977, RNA polymerase II regulatory region sequence-specific DNA binding;GO:0000978, RNA polymerase II proximal promoter sequence-specific DNA binding;GO:0000981, RNA polymerase II transcription factor activity, sequence-specific DNA binding;GO:0000982, transcription factor activity, RNA polymerase II proximal promoter…	XP_019621835.1 PREDICTED: dipeptidase 1-like [Branchiostoma belcheri] 4.13e-88	-
TRINITY_DN11169_c0_g1	1.89215	10.612	-2.4876	0.000200932	0.00227431	down	cd00610, OAT_like, Acetyl ornithine aminotransferase family. This family belongs to pyridoxal phosphate (PLP)-dependent aspartate aminotransferase superfamily (fold I). The major groups in this CD correspond to ornithine aminotransferase, acetylornithine aminotransferase, alanine-glyoxylate aminotransferase, dialkylglycine decarboxylase, 4-aminobutyrate aminotransferase, beta-alanine-pyruvate ami…	pfam00202, Aminotran_3, Aminotransferase class-III. 2.40e-54	-	KOG1404, KOG1404, KOG1404, Alanine-glyoxylate aminotransferase AGT2 [Amino acid transport and metabolism]. 7.04e-54	sp|O94562|YGD3_SCHPO Uncharacterized aminotransferase C1771.03c OS=Schizosaccharomyces pombe (strain 972 / ATCC 24843) GN=SPBC1773.03c PE=3 SV=1 1.11e-98	-	MCL4121330.1 hypothetical protein [Idotea baltica] 8.79e-109	-
TRINITY_DN11517_c0_g1	3.69323	20.7128	-2.48756	0.000353166	0.00363441	down	-	pfam02353, CMAS, Mycolic acid cyclopropane synthetase. This family consist of Cyclopropane-fatty-acyl-phospholipid synthase or CFA synthase EC:2.1.1.79 this enzyme catalyze the reaction: S-adenosyl-L-methionine + phospholipid olefinic fatty acid <=> S-adenosyl-L-homocysteine + phospholipid cyclopropane fatty acid. 5.39e-11	-	-	sp|O53732|UFAA1_MYCTU Tuberculostearic acid methyltransferase UfaA1 OS=Mycobacterium tuberculosis (strain ATCC 25618 / H37Rv) GN=ufaA1 PE=1 SV=3 4.66e-11	-	KAJ3026466.1 hypothetical protein HDU68_005598 [Siphonaria sp. JEL0065] 5.53e-55	-
TRINITY_DN10060_c0_g1	2.53248	14.1857	-2.48582	0.00154584	0.0118155	down	cd19121, AKR_AKR3D1, AKR3D family of aldo-keto reductase (AKR). Trichoderma reesei D-galacturonate reductase (GAR1, EC 1.1.1.365), also called D-galacturonic acid reductase, or GalUR, is a founding member of aldo-keto reductase family 3 member D1 (AKR3D1). It mediates the reduction of D-galacturonate to L-galactonate, the first step in D-galacturonate catabolic process. It also has activity with …	pfam00248, Aldo_ket_red, Aldo/keto reductase family. This family includes a number of K+ ion channel beta chain regulatory domains - these are reported to have oxidoreductase activity. 8.18e-18	K18097-ko00561 Glycerolipid metabolism	KOG1577, KOG1577, KOG1577, Aldo/keto reductase family proteins [General function prediction only]. 4.37e-56	sp|Q3ZFI7|GAR1_HYPJE D-galacturonate reductase OS=Hypocrea jecorina GN=gar1 PE=1 SV=1 3.22e-06	-	GIY40882.1 aldo-keto reductase family 1 member A1 [Caerostris darwini] 6.60e-55	-
TRINITY_DN8707_c0_g2	0.514905	2.87434	-2.48085	0.00510306	0.0294707	down	-	pfam01425, Amidase, Amidase. 8.17e-18	-	KOG1211, KOG1211, KOG1211, Amidases [Translation, ribosomal structure and biogenesis]. 7.21e-16	sp|Q6MRL7|GATA_BDEBA Glutamyl-tRNA(Gln) amidotransferase subunit A OS=Bdellovibrio bacteriovorus (strain ATCC 15356 / DSM 50701 / NCIB 9529 / HD100) GN=gatA PE=3 SV=1 7.32e-19	-	XP_007450871.1 PREDICTED: glutamyl-tRNA(Gln) amidotransferase subunit A, mitochondrial-like, partial [Lipotes vexillifer] 6.70e-74	-
TRINITY_DN10717_c0_g1	4.99271	27.8596	-2.48028	0.000205478	0.00231545	down	-	pfam05199, GMC_oxred_C, GMC oxidoreductase. This domain found associated with pfam00732. 5.88e-12	-	KOG1238, KOG1238, KOG1238, Glucose dehydrogenase/choline dehydrogenase/mandelonitrile lyase (GMC oxidoreductase family) [General function prediction only]. 4.10e-46	sp|P13006|GOX_ASPNG Glucose oxidase OS=Aspergillus niger GN=gox PE=1 SV=1 4.48e-79	-	MCL4106642.1 hypothetical protein [Idotea baltica] 5.47e-47	-
TRINITY_DN12894_c0_g1	0.4697	2.61682	-2.478	0.00147828	0.0114228	down	-	pfam00933, Glyco_hydro_3, Glycosyl hydrolase family 3 N terminal domain. 2.18e-25	-	-	sp|P27034|BGLS_RHIRD Beta-glucosidase OS=Rhizobium radiobacter GN=cbg-1 PE=3 SV=1 4.13e-99	-	MCL4141981.1 hypothetical protein [Idotea baltica] 4.14e-88	-
TRINITY_DN11532_c0_g1	29.3015	162.744	-2.47356	1.21077e-05	0.000213456	down	-	pfam00153, Mito_carr, Mitochondrial carrier protein. 1.91e-06	-	KOG0752, KOG0752, KOG0752, Mitochondrial solute carrier protein [Energy production and conversion]. 8.01e-10	sp|Q12251|YP011_YEAST Uncharacterized mitochondrial carrier YPR011C OS=Saccharomyces cerevisiae (strain ATCC 204508 / S288c) GN=YPR011C PE=1 SV=1 1.13e-14	GO:0000295, adenine nucleotide transmembrane transporter activity;GO:0003674, molecular_function;GO:0005215, transporter activity;GO:0005346, purine ribonucleotide transmembrane transporter activity;GO:0005575, cellular_component;GO:0005622, intracellular;GO:0005623, cell;GO:0005737, cytoplasm;GO:0005739, mitochondrion;GO:0005740, mitochondrial envelope;GO:0005743, mitochondrial inner membrane;GO…	XP_022804590.1 mitochondrial adenine nucleotide transporter ADNT1-like [Stylophora pistillata] >PFX16714.1 Mitochondrial adenine nucleotide transporter ADNT1 [Stylophora pistillata] 1.45e-42	-
TRINITY_DN13525_c0_g1	1.79006	9.9314	-2.47198	0.000864774	0.00739216	down	cd00312, Esterase_lipase, Esterases and lipases (includes fungal lipases, cholinesterases, etc.) These enzymes act on carboxylic esters (EC: 3.1.1.-). The catalytic apparatus involves three residues (catalytic triad): a serine, a glutamate or aspartate and a histidine.These catalytic residues are responsible for the nucleophilic attack on the carbonyl carbon atom of the ester bond. In contrast wi…	pfam00135, COesterase, Carboxylesterase family. 6.27e-30	-	KOG4389, KOG4389, KOG4389, Acetylcholinesterase/Butyrylcholinesterase [Signal transduction mechanisms]. 3.73e-29	sp|P32749|CHLE_BOVIN Cholinesterase OS=Bos taurus GN=BCHE PE=2 SV=2 1.34e-26	-	6EMI_A Crystal structure of a variant of human butyrylcholinesterase expressed in bacteria. [Homo sapiens] >6EMI_B Crystal structure of a variant of human butyrylcholinesterase expressed in bacteria. [Homo sapiens] 1.58e-30	-
TRINITY_DN12500_c0_g3	2.07622	11.4877	-2.46806	0.000549826	0.0052039	down	-	pfam08654, DASH_Dad2, DASH complex subunit Dad2. The DASH complex is a ~10 subunit microtubule-binding complex that is transferred to the kinetochore prior to mitosis. In Saccharomyces cerevisiae DASH forms both rings and spiral structures on microtubules in vitro. 1.55e-14	-	-	-	-	-	-
TRINITY_DN10309_c0_g2	14.1007	77.8853	-2.46558	0.000238976	0.00261639	down	cd17323, MFS_Tpo1_MDR_like, Yeast Polyamine transporter 1 (Tpo1) and similar multidrug resistance (MDR) transporters of the Major Facilitator Superfamily. This family is composed of fungal multidrug resistance (MDR) transporters including several proteins from Saccharomyces cerevisiae such as polyamine transporters 1-4 (Tpo1-4), quinidine resistance proteins 1-3 (Qdr1-3), dityrosine transporter 1…	-	-	KOG0255, KOG0255, KOG0255, Synaptic vesicle transporter SVOP and related transporters (major facilitator superfamily) [General function prediction only]. 1.57e-07	sp|Q2U5H8|KOJT_ASPOR Probable efflux pump kojT OS=Aspergillus oryzae (strain ATCC 42149 / RIB 40) GN=kojT PE=1 SV=1 1.75e-41	-	CAF0786647.1 unnamed protein product [Adineta ricciae] >CAF1184716.1 unnamed protein product [Adineta ricciae] 9.86e-45	-
TRINITY_DN10620_c0_g2	1.78731	9.86232	-2.46414	0.000694164	0.00625782	down	cd11064, CYP86A, cytochrome P450 family 86, subfamily A. This subfamily includes several Arabidopsis thaliana cytochrome P450s (CYP86A1, CYP86A2, CYP86A4, among others), Petunia x hybrida CYP86A22, and Vicia sativa CYP94A1 and CYP94A2. They are P450-dependent fatty acid omega-hydroxylases that catalyze the omega-hydroxylation of various fatty acids. CYP86A2 acts on saturated and unsaturated fatty…	pfam00067, p450, Cytochrome P450. Cytochrome P450s are haem-thiolate proteins involved in the oxidative degradation of various compounds. They are particularly well known for their role in the degradation of environmental toxins and mutagens. They can be divided into 4 classes, according to the method by which electrons from NAD(P)H are delivered to the catalytic site. Sequence conservation is re…	-	KOG0157, KOG0157, KOG0157, Cytochrome P450 CYP4/CYP19/CYP26 subfamilies [Secondary metabolites biosynthesis, transport and catabolism, Lipid transport and metabolism]. 1.81e-42	sp|P48422|C86A1_ARATH Cytochrome P450 86A1 OS=Arabidopsis thaliana GN=CYP86A1 PE=1 SV=2 3.54e-57	-	KAJ3025857.1 hypothetical protein HDU68_006584 [Siphonaria sp. JEL0065] 5.94e-53	-
TRINITY_DN7480_c0_g1	1.97329	10.8873	-2.46397	0.0010128	0.00836297	down	cd20071, SET_SMYD, SET domain (including SET domain and post-SET domain) found in SET and MYND domain-containing protein, and similar proteins. The family includes SET and MYND domain-containing proteins, SMYD1-SYMD5. SMYD1 (EC 2.1.1.43; also termed BOP) is a heart and muscle specific SET-MYND domain containing protein, which functions as a histone methyltransferase and regulates downstream gene …	-	-	-	sp|O74467|SET5_SCHPO SET domain-containing protein 5 OS=Schizosaccharomyces pombe (strain 972 / ATCC 24843) GN=set5 PE=1 SV=1 1.10e-12	-	TRY70054.1 hypothetical protein TCAL_04842 [Tigriopus californicus] 4.03e-12	-
TRINITY_DN7801_c0_g1	0.857114	4.71743	-2.46044	0.00240383	0.0165162	down	sd00045, ANK, ankyrin repeats. Ankyrin repeats are one of the most abundant repeat motifs, and generally function as scaffolds for protein-protein interactions in processes including cell cycle, transcriptional regulation, signal transduction, vesicular trafficking, and inflammatory response. Although predominantly found in eukaryotic proteins, they are also found in some bacterial and viral prot…	pfam06985, HET, Heterokaryon incompatibility protein (HET). This family represents a conserved region approximately 150 residues long within various heterokaryon incompatibility proteins that seem to be restricted to ascomycete fungi. Genetic differences in specific het genes prevent a viable heterokaryotic fungal cell from being formed by the fusion of filaments from two different wild-type stra…	-	KOG0508, KOG0508, KOG0508, Ankyrin repeat protein [General function prediction only]. 4.19e-09	sp|Q7T163|KDIS_DANRE Kinase D-interacting substrate of 220 kDa OS=Danio rerio GN=kidins220 PE=2 SV=2 7.80e-11	-	KAI1691421.1 heterokaryon incompatibility protein (HET) domain-containing protein [Ditylenchus destructor] 2.76e-22	-
TRINITY_DN7232_c0_g1	9.88784	54.4131	-2.46023	1.45065e-05	0.000247792	down	cd01562, Thr-dehyd, Threonine dehydratase: The first step in amino acid degradation is the removal of nitrogen. Although the nitrogen atoms of most amino acids are transferred to alpha-ketoglutarate before removal, the alpha-amino group of threonine can be directly converted into NH4+. The direct deamination is catalyzed by threonine dehydratase, in which pyridoxal phosphate (PLP) is the prosthet…	pfam00291, PALP, Pyridoxal-phosphate dependent enzyme. Members of this family are all pyridoxal-phosphate dependent enzymes. This family includes: serine dehydratase EC:4.2.1.13 P20132, threonine dehydratase EC:4.2.1.16, tryptophan synthase beta chain EC:4.2.1.20, threonine synthase EC:4.2.99.2, cysteine synthase EC:4.2.99.8 P11096, cystathionine beta-synthase EC:4.2.1.22, 1-aminocyclopropane-1-c…	K01754-ko00260 Glycine, serine and threonine metabolism;ko01230 Biosynthesis of amino acids;ko00290 Valine, leucine and isoleucine biosynthesis;ko01200 Carbon metabolism	KOG1250, KOG1250, KOG1250, Threonine/serine dehydratases [Amino acid transport and metabolism]. 1.61e-75	sp|O42615|THDH_BLAAD Threonine dehydratase, mitochondrial OS=Blastobotrys adeninivorans GN=ILV1 PE=3 SV=1 0.0	GO:0003674, molecular_function;GO:0003824, catalytic activity;GO:0004794, L-threonine ammonia-lyase activity;GO:0005575, cellular_component;GO:0005622, intracellular;GO:0005623, cell;GO:0005737, cytoplasm;GO:0005739, mitochondrion;GO:0006082, organic acid metabolic process;GO:0006520, cellular amino acid metabolic process;GO:0006549, isoleucine metabolic process;GO:0006566, threonine metabolic pr…	AQT27276.1 putative threonine ammonia-lyase, partial [Nilaparvata lugens] 6.94e-191	-
TRINITY_DN7644_c0_g1	4.32924	23.8239	-2.46022	0.00620461	0.0341858	down	-	-	-	-	-	-	-	-
TRINITY_DN13798_c2_g1	4.46081	24.5222	-2.45871	1.95183e-05	0.000318481	down	-	-	-	-	-	-	CAF1402541.1 unnamed protein product [Adineta ricciae] 4.45e-17	-
TRINITY_DN6152_c0_g1	10.0095	54.8034	-2.45289	0.000641511	0.00592605	down	cd11042, CYP51-like, cytochrome P450 family 51 and similar cytochrome P450s. This family is composed of cytochrome P450 51 (CYP51 or sterol 14alpha-demethylase) and related cytochrome P450s. CYP51 is the only cytochrome P450 enzyme with a conserved function across animals, fungi, and plants, in the synthesis of essential sterols. In mammals, it is expressed in many different tissues, with highest…	pfam00067, p450, Cytochrome P450. Cytochrome P450s are haem-thiolate proteins involved in the oxidative degradation of various compounds. They are particularly well known for their role in the degradation of environmental toxins and mutagens. They can be divided into 4 classes, according to the method by which electrons from NAD(P)H are delivered to the catalytic site. Sequence conservation is re…	K05917-ko00100 Steroid biosynthesis	KOG0684, KOG0684, KOG0684, Cytochrome P450 [Secondary metabolites biosynthesis, transport and catabolism]. 3.01e-84	sp|O14442|CP51_UNCNE Eburicol 14-alpha-demethylase OS=Uncinula necator GN=CYP51 PE=2 SV=2 8.03e-175	-	UPN65126.1 cytochrome P450-9, partial [Laodelphax striatellus] 1.52e-193	-
TRINITY_DN12327_c0_g1	11.9179	65.196	-2.45165	0.00049134	0.00476386	down	-	-	-	-	-	-	-	-
TRINITY_DN14196_c5_g2	4.49794	24.5982	-2.45122	0.000119074	0.00145814	down	cd17502, MFS_Azr1_MDR_like, Saccharomyces cerevisiae Azole resistance protein 1 (Azr1p), and similar multidrug resistance (MDR) transporters of the Major Facilitator Superfamily. This subfamily is composed of multidrug resistance (MDR) transporters including various Saccharomyces cerevisiae proteins such as azole resistance protein 1 (Azr1p), vacuolar basic amino acid transporter 1 (Vba1p), vacuo…	pfam04082, Fungal_trans, Fungal specific transcription factor domain. 1.41e-06	-	-	sp|B6HJU0|ROQT_PENRW Efflux pump roqT OS=Penicillium rubens (strain ATCC 28089 / DSM 1075 / NRRL 1951 / Wisconsin 54-1255) GN=roqT PE=1 SV=1 1.77e-164	-	KAJ3010587.1 hypothetical protein HDU68_002075 [Siphonaria sp. JEL0065] 8.47e-85	-
TRINITY_DN18487_c0_g1	3.76048	20.5576	-2.45069	0.00133999	0.0104816	down	-	-	-	-	-	-	-	-
TRINITY_DN14250_c1_g7	1.04239	5.68311	-2.44679	0.00553489	0.0312407	down	-	-	-	-	-	-	-	-
TRINITY_DN14070_c1_g2	16.5442	90.1584	-2.44614	1.80881e-05	0.000298984	down	cd07229, Pat_TGL3_like, Triacylglycerol lipase 3. Triacylglycerol lipase 3 (TGL3) are responsible for all the TAG lipase activity of the lipid particle. Triacylglycerol (TAG) lipases are also necessary for the mobilization of TAG stored in lipid particles. TGL3 contains the consensus sequence motif GXSXG, which is found in lipolytic enzymes. This family includes Tgl3p from Saccharomyces cerevisia…	pfam11815, DUF3336, Domain of unknown function (DUF3336). This family of proteins are functionally uncharacterized. This family is found in bacteria and eukaryotes. This presumed domain is typically between 143 to 227 amino acids in length. 2.95e-16	K14675-ko00561 Glycerolipid metabolism	KOG2214, KOG2214, KOG2214, Predicted esterase of the alpha-beta hydrolase superfamily [General function prediction only]. 1.17e-79	sp|Q9Y7P3|TLG3_SCHPO Probable triacylglycerol lipase C1450.16c OS=Schizosaccharomyces pombe (strain 972 / ATCC 24843) GN=SPCC1450.16c PE=3 SV=2 1.14e-87	GO:0000003, reproduction;GO:0003674, molecular_function;GO:0003824, catalytic activity;GO:0004806, triglyceride lipase activity;GO:0005575, cellular_component;GO:0005622, intracellular;GO:0005623, cell;GO:0005811, lipid droplet;GO:0006629, lipid metabolic process;GO:0006638, neutral lipid metabolic process;GO:0006639, acylglycerol metabolic process;GO:0006641, triglyceride metabolic process;GO:00…	KAJ3025690.1 hypothetical protein HDU68_006805 [Siphonaria sp. JEL0065] 2.76e-101	-
TRINITY_DN14228_c2_g7	5.91385	32.1771	-2.44387	0.000585733	0.00547848	down	sd00045, ANK, ankyrin repeats. Ankyrin repeats are one of the most abundant repeat motifs, and generally function as scaffolds for protein-protein interactions in processes including cell cycle, transcriptional regulation, signal transduction, vesicular trafficking, and inflammatory response. Although predominantly found in eukaryotic proteins, they are also found in some bacterial and viral prot…	pfam17100, NACHT_N, N-terminal domain of NWD NACHT-NTPase. This is an N-terminal domain on putative NWD NACHT proteins, signal transducing ATPases which undergo ligand-induced oligomerization. 1.84e-10	-	KOG4177, KOG4177, KOG4177, Ankyrin [Cell wall/membrane/envelope biogenesis]. 5.15e-07	sp|Q00808|HETE1_PODAS Vegetative incompatibility protein HET-E-1 OS=Podospora anserina GN=HET-E1 PE=3 SV=1 5.30e-16	-	-	-
TRINITY_DN7274_c0_g1	1.64497	8.94099	-2.44237	0.000754593	0.00669807	down	-	-	-	-	-	-	-	-
TRINITY_DN9509_c0_g1	1.86477	10.1311	-2.44172	0.00998294	0.0488157	down	-	-	-	-	-	-	-	-
TRINITY_DN11136_c0_g1	0.821771	4.46049	-2.44039	0.00781135	0.0405597	down	-	pfam04299, FMN_bind_2, Putative FMN-binding domain. In Bacillus subtilis, family member PAI 2/ORF-2 was found to be essential for growth. The SUPERFAMILY database finds that this domain is related to FMN-binding domains, suggesting this protein is also FMN-binding. 1.28e-23	-	-	sp|Q4WVZ0|YA800_ASPFU Uncharacterized protein AFUA_5G13800 OS=Neosartorya fumigata (strain ATCC MYA-4609 / Af293 / CBS 101355 / FGSC A1100) GN=AFUA_5G13800 PE=3 SV=1 2.59e-58	-	CAF0799738.1 unnamed protein product [Didymodactylos carnosus] >CAF0921665.1 unnamed protein product [Didymodactylos carnosus] >CAF3583014.1 unnamed protein product [Didymodactylos carnosus] >CAF3700881.1 unnamed protein product [Didymodactylos carnosus] 2.85e-42	-
TRINITY_DN13698_c3_g10	0.703105	3.81402	-2.4395	0.00275519	0.0183742	down	-	-	-	-	-	-	-	-
TRINITY_DN13379_c1_g2	32.3569	175.4	-2.4385	2.65656e-05	0.000414325	down	cd01079, NAD_bind_m-THF_DH, NAD binding domain of methylene-tetrahydrofolate dehydrogenase. The NAD-binding domain of methylene-tetrahydrofolate dehydrogenase (m-THF DH). M-THF is a versatile carrier of activated one-carbon units. The major one-carbon folate donors are N-5 methyltetrahydrofolate, N5,N10-m-THF, and N10-formayltetrahydrofolate. The oxidation of metabolic intermediate m-THF to m-THF…	pfam06703, SPC25, Microsomal signal peptidase 25 kDa subunit (SPC25). This family consists of several microsomal signal peptidase 25 kDa subunit proteins. Translocation of polypeptide chains across the endoplasmic reticulum (ER) membrane is triggered by signal sequences. Subsequently, signal recognition particle interacts with its membrane receptor and the ribosome-bound nascent chain is targeted…	K00295-ko00670 One carbon pool by folate	KOG0089, KOG0089, KOG0089, Methylenetetrahydrofolate dehydrogenase/methylenetetrahydrofolate cyclohydrolase [Coenzyme transport and metabolism]. 1.32e-32	sp|Q9P786|MTD1_SCHPO Methylenetetrahydrofolate dehydrogenase [NAD(+)] OS=Schizosaccharomyces pombe (strain 972 / ATCC 24843) GN=mtd1 PE=3 SV=1 2.55e-122	GO:0003674, molecular_function;GO:0003824, catalytic activity;GO:0004487, methylenetetrahydrofolate dehydrogenase (NAD+) activity;GO:0005575, cellular_component;GO:0005622, intracellular;GO:0005623, cell;GO:0005737, cytoplasm;GO:0005829, cytosol;GO:0006082, organic acid metabolic process;GO:0006139, nucleobase-containing compound metabolic process;GO:0006144, purine nucleobase metabolic process;G…	KAJ3028958.1 hypothetical protein HDU68_000485 [Siphonaria sp. JEL0065] 2.01e-106	-
TRINITY_DN13943_c0_g1	132.206	714.429	-2.434	0.00121618	0.00971644	down	-	-	-	-	-	-	-	-
TRINITY_DN73_c0_g1	1.9959	10.7719	-2.43216	0.00147127	0.0113931	down	cd18086, HsC9orf114-like, SPOUT superfamily RNA methyltransferase HsC9orf114-like. Human C9orf114 (also known as centromere protein 32 or CENP-32) is required for association of the centrosomes with the poles of the bipolar mitotic spindle during metaphase. CENP-32 is a member of the SPOUT (SpoU-TrmD) methyltransferase (MTase) superfamily, a large class of S-adenosyl-L-methionine (AdoMet or SAM)-…	pfam02598, Methyltrn_RNA_3, Putative RNA methyltransferase. This family has a TIM barrel-like fold with a deep C-terminal trefoil knot. The arrangement of its hydrophilic and hydrophobic surfaces are opposite to that of the classic TIM barrel proteins. It is likely to bind RNA, and may function as a methyltransferase. 8.48e-76	-	KOG3925, KOG3925, KOG3925, Uncharacterized conserved protein [Function unknown]. 8.23e-54	sp|Q5T280|CI114_HUMAN Putative methyltransferase C9orf114 OS=Homo sapiens GN=C9orf114 PE=1 SV=3 6.81e-65	-	XP_028394946.1 putative methyltransferase C9orf114 homolog [Dendronephthya gigantea] 3.84e-66	-
TRINITY_DN12338_c0_g1	6.9545	37.4283	-2.42811	0.00383912	0.0236544	down	-	-	-	-	-	-	-	-
TRINITY_DN3570_c0_g1	23.2591	125.174	-2.42807	0.00232336	0.0160588	down	-	-	-	-	-	-	-	-
TRINITY_DN13235_c0_g1	1.46832	7.89707	-2.42715	0.00288383	0.0190375	down	-	-	-	-	-	-	-	-
TRINITY_DN7273_c0_g1	0.39116	2.10249	-2.42627	0.00702516	0.0375039	down	-	-	-	-	sp|Q2LRP7|TOLB_SYNAS Protein TolB OS=Syntrophus aciditrophicus (strain SB) GN=tolB PE=3 SV=2 1.65e-07	-	-	-
TRINITY_DN7748_c0_g1	3.89303	20.9168	-2.4257	0.000113882	0.00140403	down	-	-	-	-	-	-	-	-
TRINITY_DN13339_c0_g7	9.05017	48.5907	-2.42466	0.00205255	0.0145429	down	cd04664, Nudix_Hydrolase_7, Members of the Nudix hydrolase superfamily catalyze the hydrolysis of NUcleoside DIphosphates linked to other moieties, X. Enzymes belonging to this superfamily require a divalent cation, such as Mg2+ or Mn2+, for their activity and contain a highly conserved 23-residue nudix motif (GX5EX7REUXEEXGU, where U = I, L or V), which functions as a metal binding and catalytic…	pfam01008, IF-2B, Initiation factor 2 subunit family. This family includes initiation factor 2B alpha, beta and delta subunits from eukaryotes, initiation factor 2B subunits 1 and 2 from archaebacteria and some proteins of unknown function from prokaryotes. Initiation factor 2 binds to Met-tRNA, GTP and the small ribosomal subunit. Members of this family have also been characterized as 5-methylth…	-	KOG1466, KOG1466, KOG1466, Translation initiation factor 2B, alpha subunit (eIF-2Balpha/GCN3) [Translation, ribosomal structure and biogenesis]. 3.14e-06	sp|O14130|YF54_SCHPO Uncharacterized transcriptional regulatory protein C3C7.04 OS=Schizosaccharomyces pombe (strain 972 / ATCC 24843) GN=SPAC3C7.04 PE=3 SV=1 3.70e-18	-	-	-
TRINITY_DN9019_c0_g1	6.32163	33.8406	-2.42039	0.00112113	0.00908779	down	-	-	-	-	-	-	-	-
TRINITY_DN11199_c0_g1	18.9721	101.303	-2.41672	2.25837e-05	0.000358827	down	-	pfam08939, DUF1917, Domain of unknown function (DUF1917). This domain is found in various hypothetical and basophilic leukaemia proteins. It has no known function. 2.21e-68	K00679-ko00561 Glycerolipid metabolism	KOG2369, KOG2369, KOG2369, Lecithin:cholesterol acyltransferase (LCAT)/Acyl-ceramide synthase [Lipid transport and metabolism]. 3.86e-69	sp|O94680|PDAT_SCHPO Phospholipid:diacylglycerol acyltransferase OS=Schizosaccharomyces pombe (strain 972 / ATCC 24843) GN=plh1 PE=1 SV=2 3.34e-175	GO:0003674, molecular_function;GO:0003824, catalytic activity;GO:0005575, cellular_component;GO:0005622, intracellular;GO:0005623, cell;GO:0005737, cytoplasm;GO:0005783, endoplasmic reticulum;GO:0005789, endoplasmic reticulum membrane;GO:0005811, lipid droplet;GO:0006629, lipid metabolic process;GO:0006638, neutral lipid metabolic process;GO:0006639, acylglycerol metabolic process;GO:0006641, tri…	CAF1479861.1 unnamed protein product [Adineta ricciae] 1.42e-77	-
TRINITY_DN9532_c0_g1	3.62445	19.3244	-2.41459	0.00140272	0.0109252	down	cd08934, CAD_SDR_c, clavulanic acid dehydrogenase (CAD), classical (c) SDR. CAD catalyzes the NADP-dependent reduction of clavulanate-9-aldehyde to clavulanic acid, a beta-lactamase inhibitor. SDRs are a functionally diverse family of oxidoreductases that have a single domain with a structurally conserved Rossmann fold (alpha/beta folding pattern with a central beta-sheet), an NAD(P)(H)-binding r…	pfam00106, adh_short, short chain dehydrogenase. This family contains a wide variety of dehydrogenases. 4.26e-21	-	KOG1205, KOG1205, KOG1205, Predicted dehydrogenase [Secondary metabolites biosynthesis, transport and catabolism]. 1.54e-17	sp|A0A097ZPE8|ANDI_EMEVA Short chain dehydrogenase andI OS=Emericella variicolor GN=andI PE=1 SV=1 3.20e-09	-	CAF0757887.1 unnamed protein product [Adineta steineri] >CAF0793179.1 unnamed protein product [Adineta steineri] 4.34e-41	-
TRINITY_DN2221_c0_g1	16.5403	88.1682	-2.41427	4.67232e-05	0.000664317	down	cd02968, SCO, SCO (an acronym for Synthesis of Cytochrome c Oxidase) family; composed of proteins similar to Sco1, a membrane-anchored protein possessing a soluble domain with a TRX fold. Members of this family are required for the proper assembly of cytochrome c oxidase (COX). They contain a metal binding motif, typically CXXXC, which is located in a flexible loop. COX, the terminal enzyme in th…	pfam02630, SCO1-SenC, SCO1/SenC. This family is involved in biogenesis of respiratory and photosynthetic systems. SCO1 is required for a post-translational step in the accumulation of subunits COXI and COXII of cytochrome c oxidase. SenC is required for optimal cytochrome c oxidase activity and maximal induction of genes encoding the light-harvesting and reaction centre complexes of R. capsulatus…	-	KOG2792, KOG2792, KOG2792, Putative cytochrome C oxidase assembly protein [Energy production and conversion]. 1.22e-64	sp|P23833|SCO1_YEAST Protein SCO1, mitochondrial OS=Saccharomyces cerevisiae (strain ATCC 204508 / S288c) GN=SCO1 PE=1 SV=1 2.81e-80	GO:0000041, transition metal ion transport;GO:0003674, molecular_function;GO:0003824, catalytic activity;GO:0004601, peroxidase activity;GO:0005488, binding;GO:0005507, copper ion binding;GO:0005575, cellular_component;GO:0005622, intracellular;GO:0005623, cell;GO:0005737, cytoplasm;GO:0005739, mitochondrion;GO:0005740, mitochondrial envelope;GO:0005743, mitochondrial inner membrane;GO:0006810, t…	KAJ3016018.1 Cu-binding protein [Siphonaria sp. JEL0065] 1.32e-58	-
TRINITY_DN10448_c0_g1	0.707395	3.76905	-2.41361	0.00211932	0.0149493	down	cd05327, retinol-DH_like_SDR_c_like, retinol dehydrogenase (retinol-DH), Light dependent Protochlorophyllide (Pchlide) OxidoReductase (LPOR) and related proteins, classical (c) SDRs. Classical SDR subgroup containing retinol-DHs, LPORs, and related proteins. Retinol is processed by a medium chain alcohol dehydrogenase followed by retinol-DHs. Pchlide reductases act in chlorophyll biosynthesis. Th…	pfam00106, adh_short, short chain dehydrogenase. This family contains a wide variety of dehydrogenases. 2.88e-14	-	KOG1208, KOG1208, KOG1208, Dehydrogenases with different specificities (related to short-chain alcohol dehydrogenases) [Secondary metabolites biosynthesis, transport and catabolism]. 1.05e-13	sp|Q92247|BLI4_NEUCR Putative oxidoreductase bli-4, mitochondrial OS=Neurospora crassa (strain ATCC 24698 / 74-OR23-1A / CBS 708.71 / DSM 1257 / FGSC 987) GN=bli-4 PE=1 SV=1 1.56e-148	GO:0003674, molecular_function;GO:0003824, catalytic activity;GO:0005575, cellular_component;GO:0005622, intracellular;GO:0005623, cell;GO:0005737, cytoplasm;GO:0005739, mitochondrion;GO:0008150, biological_process;GO:0008152, metabolic process;GO:0016491, oxidoreductase activity;GO:0043226, organelle;GO:0043227, membrane-bounded organelle;GO:0043229, intracellular organelle;GO:0043231, intracell…	KAJ3024599.1 hypothetical protein HDU68_007972 [Siphonaria sp. JEL0065] 6.39e-21	-
TRINITY_DN11384_c0_g2	6.52503	34.7555	-2.41318	6.11801e-05	0.000835296	down	-	pfam08637, NCA2, ATP synthase regulation protein NCA2. NCA2 has been shown to be required for the regulation of ATP synthase subunits Atp6p and Atp8p in Saccharomyces cerevisiae. 1.32e-103	-	-	sp|O74963|NCA2_SCHPO Nuclear control of ATPase protein 2 OS=Schizosaccharomyces pombe (strain 972 / ATCC 24843) GN=nca2 PE=3 SV=1 3.01e-48	GO:0005575, cellular_component;GO:0005622, intracellular;GO:0005623, cell;GO:0005737, cytoplasm;GO:0005739, mitochondrion;GO:0005740, mitochondrial envelope;GO:0005741, mitochondrial outer membrane;GO:0006091, generation of precursor metabolites and energy;GO:0006139, nucleobase-containing compound metabolic process;GO:0006725, cellular aromatic compound metabolic process;GO:0006807, nitrogen com…	KNC24935.1 hypothetical protein FF38_05029 [Lucilia cuprina] 2.31e-19	-
TRINITY_DN9588_c0_g1	8.6653	46.1059	-2.41163	5.71038e-05	0.000786399	down	-	-	-	-	-	GO:0000123, histone acetyltransferase complex;GO:0000228, nuclear chromosome;GO:0000785, chromatin;GO:0000790, nuclear chromatin;GO:0003674, molecular_function;GO:0005488, binding;GO:0005515, protein binding;GO:0005575, cellular_component;GO:0005622, intracellular;GO:0005623, cell;GO:0005634, nucleus;GO:0005654, nucleoplasm;GO:0005694, chromosome;GO:0006323, DNA packaging;GO:0006325, chromatin or…	-	-
TRINITY_DN9489_c0_g1	1.25288	6.66624	-2.41162	0.00213388	0.0150353	down	cd14966, 7tmD_STE3, fungal a-factor pheromone receptor STE3, member of the class D family of seven-transmembrane G protein-coupled receptors. This subfamily represents the a-factor pheromone receptor encoded by the STE3 gene, which is required for pheromone sensing and mating in haploid cells of the yeast Saccharomyces cerevisiae. The STE3-encoded seven-transmembrane domain receptor is a member o…	pfam02076, STE3, Pheromone A receptor. 1.49e-15	K04627-ko04011 MAPK signaling pathway - yeast	-	sp|P06783|STE3_YEAST Pheromone a factor receptor OS=Saccharomyces cerevisiae (strain ATCC 204508 / S288c) GN=STE3 PE=1 SV=1 5.31e-09	-	-	-
TRINITY_DN18694_c0_g1	0.856303	4.55555	-2.41143	0.00261847	0.0176289	down	cd17330, MFS_SLC46_TetA_like, Eukaryotic Solute carrier 46 (SLC46) family, Bacterial Tetracycline resistance proteins, and similar proteins of the Major Facilitator Superfamily of transporters. This family is composed of the eukaryotic proteins MFSD9, MFSD10, MFSD14, and SLC46 family proteins, as well as bacterial multidrug resistance (MDR) transporters such as tetracycline resistance protein Tet…	-	-	KOG2615, KOG2615, KOG2615, Permease of the major facilitator superfamily [General function prediction only]. 4.50e-16	sp|P25351|YCR3_YEAST Uncharacterized membrane protein YCR023C OS=Saccharomyces cerevisiae (strain ATCC 204508 / S288c) GN=YCR023C PE=1 SV=2 1.43e-55	-	KAJ3004565.1 hypothetical protein HDU68_005014 [Siphonaria sp. JEL0065] 5.28e-41	-
TRINITY_DN12015_c0_g1	0.887565	4.72052	-2.41102	0.00108883	0.00887753	down	cd01437, parp_like, Poly(ADP-ribose) polymerase (parp) catalytic domain catalyses the covalent attachment of ADP-ribose units from NAD+ to itself and to a limited number of other DNA binding proteins, which decreases their affinity for DNA. Poly(ADP-ribose) polymerase is a regulatory component induced by DNA damage. The carboxyl-terminal region is the most highly conserved region of the protein. …	pfam00644, PARP, Poly(ADP-ribose) polymerase catalytic domain. Poly(ADP-ribose) polymerase catalyzes the covalent attachment of ADP-ribose units from NAD+ to itself and to a limited number of other DNA binding proteins, which decreases their affinity for DNA. Poly(ADP-ribose) polymerase is a regulatory component induced by DNA damage. The carboxyl-terminal region is the most highly conserved regi…	K10798-ko04212 Longevity regulating pathway - worm;ko04210 Apoptosis;ko03410 Base excision repair;ko04214 Apoptosis - fly	KOG1037, KOG1037, KOG1037, NAD+ ADP-ribosyltransferase Parp, required for poly-ADP ribosylation of nuclear proteins [Transcription, Replication, recombination and repair, Posttranslational modification, protein turnover, chaperones]. 1.41e-53	sp|O50017|PARP2_MAIZE Poly [ADP-ribose] polymerase 2 OS=Zea mays GN=PARP2 PE=2 SV=1 1.13e-94	-	KAJ3017754.1 Poly [ADP-ribose] polymerase 2 [Siphonaria sp. JEL0065] 3.11e-93	-
TRINITY_DN1581_c0_g1	2.26469	12.0358	-2.40995	0.000397282	0.00400782	down	cd18653, CD_HP1a_insect, chromodomain of insect HP1a. CHRomatin Organization Modifier (chromo) domain of insect HP1a. HP1a is a member of the heterochromatin protein family, and is enriched in the heterochromatin and associated with centromeres. HP1 has diverse functions in heterochromatin formation and impacts both gene expression and gene silencing. HP1 has two conserved protein-protein interac…	pfam00385, Chromo, Chromo (CHRromatin Organisation MOdifier) domain. 2.01e-08	-	-	sp|P29227|HP1_DROVI Heterochromatin protein 1 OS=Drosophila virilis GN=HP1A PE=3 SV=1 2.90e-08	-	XP_023329641.1 chromobox protein homolog 1-like [Eurytemora affinis] 3.26e-10	-
TRINITY_DN6586_c0_g1	5.26712	27.9872	-2.40968	0.000365124	0.00373378	down	-	-	-	-	-	-	-	-
TRINITY_DN12004_c0_g1	191.144	1014.45	-2.40796	0.00696498	0.0372955	down	-	-	-	-	-	-	-	-
TRINITY_DN11081_c0_g1	2.82291	14.9799	-2.40777	0.00299806	0.0195527	down	-	-	-	-	-	-	-	-
TRINITY_DN10512_c0_g1	13.6555	72.447	-2.40745	0.00184906	0.013531	down	cd18820, GH43_LbAraf43-like, Glycosyl hydrolase family 43 proteins similar to Lactobacillus brevis alpha-L-arabinofuranosidase LbAraf43 and Geobacillus thermoleovorans GbtXyl43B. This uncharacterized glycosyl hydrolase family 43 (GH43) subgroup belongs to a subgroup which includes enzymes with beta-xylosidase (EC 3.2.1.37), alpha-L-arabinofuranosidase (EC 3.2.1.55) and possibly bifunctional xylos…	-	-	-	sp|P82594|IABF_STRCX Extracellular exo-alpha-(1->5)-L-arabinofuranosidase OS=Streptomyces chartreusis PE=1 SV=1 4.91e-22	-	UJR17230.1 hypothetical protein I4U23_004125 [Adineta vaga] 3.48e-43	-
TRINITY_DN12360_c0_g1	3.83641	20.2769	-2.40201	0.000230026	0.00253649	down	cd01015, CSHase, N-carbamoylsarcosine amidohydrolase (CSHase) hydrolyzes N-carbamoylsarcosine to sarcosine, carbon dioxide and ammonia. CSHase is involved in one of the two alternative pathways for creatinine degradation to glycine in microorganisms.This CSHase-containing pathway degrades creatinine via N-methylhydantoin N-carbamoylsarcosine and sarcosine to glycine. Enzymes of this pathway are u…	pfam08659, KR, KR domain. This enzymatic domain is part of bacterial polyketide synthases and catalyzes the first step in the reductive modification of the beta-carbonyl centers in the growing polyketide chain. It uses NADPH to reduce the keto group to a hydroxy group. 3.17e-34	-	KOG1202, KOG1202, KOG1202, Animal-type fatty acid synthase and related proteins [Lipid transport and metabolism]. 2.79e-11	sp|Q8J0F5|MLCB_PENCI Compactin diketide synthase mokB OS=Penicillium citrinum GN=mlcB PE=1 SV=1 9.99e-77	-	CAH1788029.1 unnamed protein product [Owenia fusiformis] 3.13e-43	-
TRINITY_DN14299_c3_g2	4.20103	22.2039	-2.402	3.71375e-05	0.000548347	down	-	-	-	KOG1485, KOG1485, KOG1485, Mitochondrial Fe2+ transporter MMT1 and related transporters (cation diffusion facilitator superfamily) [Inorganic ion transport and metabolism]. 9.02e-36	sp|Q9LDU0|MTP7_ORYSJ Metal tolerance protein 7 OS=Oryza sativa subsp. japonica GN=MTP7 PE=2 SV=1 2.62e-44	-	XP_025082008.1 metal tolerance protein 9-like [Pomacea canaliculata] >PVD37011.1 hypothetical protein C0Q70_04004 [Pomacea canaliculata] 1.23e-47	-
TRINITY_DN12481_c0_g1	6.5222	34.3456	-2.3967	0.000363429	0.00372244	down	-	-	-	-	sp|Q9P7N6|YIO2_SCHPO TPR repeat-containing protein P27G11.02 OS=Schizosaccharomyces pombe (strain 972 / ATCC 24843) GN=SPAP27G11.02 PE=3 SV=1 9.64e-16	-	-	-
TRINITY_DN2295_c0_g1	7.80651	41.016	-2.39344	0.00370065	0.0229458	down	-	-	-	-	-	-	-	-
TRINITY_DN12185_c0_g1	2.4684	12.9511	-2.39143	0.00074136	0.00660366	down	-	pfam06516, NUP, Purine nucleoside permease (NUP). This family consists of several purine nucleoside permease from both bacteria and fungi. 3.14e-94	-	-	sp|O93844|NUP_CANAX Purine nucleoside permease OS=Candida albicans GN=NUP PE=3 SV=1 1.19e-76	GO:0003674, molecular_function;GO:0005215, transporter activity;GO:0005337, nucleoside transmembrane transporter activity;GO:0005575, cellular_component;GO:0006810, transport;GO:0006811, ion transport;GO:0006812, cation transport;GO:0008150, biological_process;GO:0008324, cation transmembrane transporter activity;GO:0015075, ion transmembrane transporter activity;GO:0015077, monovalent inorganic …	KMQ91383.1 purine nucleoside permease [Lasius niger] 2.79e-14	-
TRINITY_DN11460_c0_g1	2.06713	10.8412	-2.39083	0.00163869	0.0123397	down	-	-	-	-	-	-	UJR29540.1 hypothetical protein I4U23_010757 [Adineta vaga] 2.80e-29	-
TRINITY_DN8605_c0_g1	1.52918	8.01974	-2.3908	0.000682053	0.00617052	down	-	-	-	KOG3299, KOG3299, KOG3299, Uncharacterized conserved protein [Function unknown]. 1.10e-10	sp|Q5GFD9|IMPCT_RAT Protein IMPACT OS=Rattus norvegicus GN=Impact PE=1 SV=1 2.92e-10	-	XP_028167795.1 protein IMPACT-like [Ostrinia furnacalis] 1.18e-13	-
TRINITY_DN7948_c0_g1	3.02049	15.7938	-2.3865	3.25637e-05	0.000491588	down	-	pfam19088, TUTase, TUTase nucleotidyltransferase domain. This nucleotidyltransferase domain is found in TUTase enzymes. 1.80e-07	-	KOG2277, KOG2277, KOG2277, S-M checkpoint control protein CID1 and related nucleotidyltransferases [Cell cycle control, cell division, chromosome partitioning]. 2.28e-23	sp|O13833|CID1_SCHPO Terminal uridylyltransferase cid1 OS=Schizosaccharomyces pombe (strain 972 / ATCC 24843) GN=cid1 PE=1 SV=2 1.42e-39	GO:0000166, nucleotide binding;GO:0000287, magnesium ion binding;GO:0000956, nuclear-transcribed mRNA catabolic process;GO:0001882, nucleoside binding;GO:0001884, pyrimidine nucleoside binding;GO:0002134, UTP binding;GO:0003674, molecular_function;GO:0003676, nucleic acid binding;GO:0003723, RNA binding;GO:0003824, catalytic activity;GO:0005488, binding;GO:0005575, cellular_component;GO:0005622, …	KAJ3031179.1 hypothetical protein HDU68_006050 [Siphonaria sp. JEL0065] 2.88e-24	-
TRINITY_DN12377_c0_g2	41.3906	216.293	-2.38561	0.00241022	0.0165244	down	-	-	-	KOG2852, KOG2852, KOG2852, Possible oxidoreductase [General function prediction only]. 1.25e-47	sp|P38758|TDA3_YEAST Putative oxidoreductase TDA3 OS=Saccharomyces cerevisiae (strain ATCC 204508 / S288c) GN=TDA3 PE=1 SV=2 2.75e-11	GO:0000003, reproduction;GO:0003674, molecular_function;GO:0003824, catalytic activity;GO:0005575, cellular_component;GO:0005622, intracellular;GO:0005623, cell;GO:0005737, cytoplasm;GO:0005739, mitochondrion;GO:0005768, endosome;GO:0005770, late endosome;GO:0006810, transport;GO:0007049, cell cycle;GO:0008150, biological_process;GO:0008152, metabolic process;GO:0009987, cellular process;GO:00125…	TRY62899.1 hypothetical protein TCAL_08189 [Tigriopus californicus] 4.78e-41	-
TRINITY_DN9636_c0_g1	3.8318	20.0234	-2.38559	9.01877e-05	0.00115796	down	cd01294, DHOase, Dihydroorotase (DHOase) catalyzes the reversible interconversion of carbamoyl aspartate to dihydroorotate, a key reaction in the pyrimidine biosynthesis. In contrast to the large polyfunctional CAD proteins of higher organisms, this group of DHOases is monofunctional and mainly dimeric. 7.79e-71	-	K01465-ko00240 Pyrimidine metabolism	KOG2902, KOG2902, KOG2902, Dihydroorotase [Nucleotide transport and metabolism]. 1.57e-75	sp|Q9UTI0|PYRC_SCHPO Probable dihydroorotase OS=Schizosaccharomyces pombe (strain 972 / ATCC 24843) GN=ura2 PE=3 SV=1 6.67e-102	GO:0003674, molecular_function;GO:0003824, catalytic activity;GO:0004151, dihydroorotase activity;GO:0005575, cellular_component;GO:0005622, intracellular;GO:0005623, cell;GO:0005634, nucleus;GO:0005737, cytoplasm;GO:0006139, nucleobase-containing compound metabolic process;GO:0006206, pyrimidine nucleobase metabolic process;GO:0006207, 'de novo' pyrimidine nucleobase biosynthetic process;GO:0006…	KAJ3026819.1 hypothetical protein HDU68_005005 [Siphonaria sp. JEL0065] 3.22e-93	-
TRINITY_DN6917_c0_g1	7.40382	38.5628	-2.38087	2.77938e-05	0.000428747	down	-	pfam14226, DIOX_N, non-haem dioxygenase in morphine synthesis N-terminal. This is the highly conserved N-terminal region of proteins with 2-oxoglutarate/Fe(II)-dependent dioxygenase activity. 2.08e-06	-	KOG0143, KOG0143, KOG0143, Iron/ascorbate family oxidoreductases [Secondary metabolites biosynthesis, transport and catabolism, General function prediction only]. 2.49e-17	sp|Q7LL04|YQK1_SCHPO UPF0676 protein C1494.01 OS=Schizosaccharomyces pombe (strain 972 / ATCC 24843) GN=SPCC1494.01 PE=3 SV=2 5.52e-15	-	CAF0854078.1 unnamed protein product [Didymodactylos carnosus] >CAF3641820.1 unnamed protein product [Didymodactylos carnosus] 4.55e-59	-
TRINITY_DN4399_c0_g1	0.920862	4.79266	-2.37977	0.00877513	0.0442622	down	-	-	-	-	-	-	-	-
TRINITY_DN9394_c0_g2	5.01424	26.0826	-2.37899	0.000164722	0.00191884	down	cd11618, ChtBD1_1, Hevein or type 1 chitin binding domain; filamentous ascomycete subfamily. Hevein or type 1 chitin binding domain (ChtBD1), a lectin domain found in proteins from plants and fungi that bind N-acetylglucosamine, plant endochitinases, wound-induced proteins such as hevein, a major IgE-binding allergen in natural rubber latex, and the alpha subunit of Kluyveromyces lactis killer to…	-	-	-	-	-	-	-
TRINITY_DN21396_c0_g1	6.07331	31.5815	-2.37852	0.000817861	0.00713999	down	-	-	-	-	-	-	-	-
TRINITY_DN9186_c0_g1	1.86614	9.68587	-2.37582	0.000496908	0.00480685	down	-	pfam11915, DUF3433, Protein of unknown function (DUF3433). This is a family of functionally uncharacterized proteins. The family is found in eukaryotes, and represents the conserved central region of the member proteins. 3.55e-13	-	-	-	-	-	-
TRINITY_DN108_c0_g1	8.94362	46.3601	-2.37395	0.000895379	0.00760265	down	-	-	-	KOG1238, KOG1238, KOG1238, Glucose dehydrogenase/choline dehydrogenase/mandelonitrile lyase (GMC oxidoreductase family) [General function prediction only]. 1.17e-10	sp|Q01738|CDH_PHACH Cellobiose dehydrogenase OS=Phanerochaete chrysosporium GN=CDH-1 PE=1 SV=1 4.07e-69	-	XP_049707822.1 ecdysone oxidase [Helicoverpa armigera] 1.22e-21	-
TRINITY_DN4336_c0_g1	7.91971	40.9894	-2.37173	3.08375e-05	0.000471691	down	cd00609, AAT_like, Aspartate aminotransferase family. This family belongs to pyridoxal phosphate (PLP)-dependent aspartate aminotransferase superfamily (fold I). Pyridoxal phosphate combines with an alpha-amino acid to form a compound called a Schiff base or aldimine intermediate, which depending on the reaction, is the substrate in four kinds of reactions (1) transamination (movement of amino gr…	pfam00155, Aminotran_1_2, Aminotransferase class I and II. 1.17e-23	K00817-ko00350 Tyrosine metabolism;ko00360 Phenylalanine metabolism;ko00400 Phenylalanine, tyrosine and tryptophan biosynthesis;ko00401 Novobiocin biosynthesis;ko00340 Histidine metabolism;ko00960 Tropane, piperidine and pyridine alkaloid biosynthesis;ko01230 Biosynthesis of amino acids	KOG0633, KOG0633, KOG0633, Histidinol phosphate aminotransferase [Amino acid transport and metabolism]. 3.81e-98	sp|P36605|HIS8_SCHPO Histidinol-phosphate aminotransferase OS=Schizosaccharomyces pombe (strain 972 / ATCC 24843) GN=his3 PE=3 SV=1 8.27e-132	GO:0000105, histidine biosynthetic process;GO:0003674, molecular_function;GO:0003824, catalytic activity;GO:0004400, histidinol-phosphate transaminase activity;GO:0005575, cellular_component;GO:0005622, intracellular;GO:0005623, cell;GO:0005737, cytoplasm;GO:0006082, organic acid metabolic process;GO:0006520, cellular amino acid metabolic process;GO:0006547, histidine metabolic process;GO:0006725…	KAJ3026349.1 histidinol-phosphate transaminase [Siphonaria sp. JEL0065] 3.35e-123	-
TRINITY_DN13798_c2_g2	1.69588	8.77416	-2.37122	0.0033105	0.0210892	down	-	-	-	-	-	-	-	-
TRINITY_DN14485_c0_g1	2.10922	10.9109	-2.37099	0.000281162	0.00299568	down	-	-	-	-	-	-	-	-
TRINITY_DN5231_c0_g1	0.914153	4.72424	-2.36958	0.00637274	0.0348554	down	-	-	-	-	-	-	-	-
TRINITY_DN9105_c0_g1	1.65428	8.54075	-2.36816	0.000301153	0.003182	down	-	pfam03022, MRJP, Major royal jelly protein. Royal jelly is the food of queen bee larvae, and is responsible for the high reproductive ability of the queen. Major royal jelly proteins make up around 90% of larval jelly proteins. This family also the sequence-related yellow protein of drosophila which controls pigmentation of the adult cuticle and larval mouth parts. 8.85e-13	-	KOG0756, KOG0756, KOG0756, Mitochondrial tricarboxylate/dicarboxylate carrier proteins [Energy production and conversion]. 1.08e-24	sp|P38152|TXTP_YEAST Tricarboxylate transport protein OS=Saccharomyces cerevisiae (strain ATCC 204508 / S288c) GN=CTP1 PE=2 SV=3 4.05e-47	-	XP_018907974.1 PREDICTED: uncharacterized protein LOC109037660 [Bemisia tabaci] 1.83e-57	-
TRINITY_DN8686_c0_g1	161.958	835.324	-2.36672	0.00794813	0.0411354	down	-	-	-	-	-	-	-	-
TRINITY_DN8409_c0_g1	3.76016	19.356	-2.36392	0.000670559	0.00611002	down	cd17327, MFS_FEN2_like, Pantothenate transporter FEN2 and similar transporters of the Major Facilitator Superfamily. This family is composed of Saccharomyces cerevisiae pantothenate transporter FEN2 (or fenpropimorph resistance protein 2) and similar proteins from fungi and bacteria including fungal vitamin H transporter, allantoate permease, and high-affinity nicotinic acid transporter, as well …	-	-	KOG2533, KOG2533, KOG2533, Permease of the major facilitator superfamily [Carbohydrate transport and metabolism]. 3.66e-08	sp|O94491|YC7A_SCHPO Uncharacterized transporter C417.10 OS=Schizosaccharomyces pombe (strain 972 / ATCC 24843) GN=SPCC417.10 PE=3 SV=1 2.98e-25	-	KAI1695427.1 fungal specific transcription factor domain-containing protein [Ditylenchus destructor] 9.66e-06	-
TRINITY_DN12361_c0_g1	3.11664	16.0429	-2.36387	0.00149016	0.0114893	down	cd12148, fungal_TF_MHR, fungal transcription factor regulatory middle homology region. This domain is present in the large family of fungal zinc cluster transcription factors that contain an N-terminal GAL4-like C6 zinc binuclear cluster DNA-binding domain. Examples of members of this large fungal group are the following Saccharomyces cerevisiae transcription factors, GAL4, STB5, DAL81, CAT8, RDR…	-	-	-	sp|O59741|YN25_SCHPO Uncharacterized transcriptional regulatory protein C530.05 OS=Schizosaccharomyces pombe (strain 972 / ATCC 24843) GN=SPBC530.05 PE=3 SV=2 2.25e-09	-	-	-
TRINITY_DN9392_c0_g1	12.2999	63.303	-2.36363	0.00849064	0.0433084	down	-	-	-	-	-	-	KMQ84549.1 polyketide cyclase [Lasius niger] 1.66e-17	-
TRINITY_DN13726_c2_g1	5.27862	27.1646	-2.3635	0.000783577	0.00690232	down	cd09122, PLDc_Tdp1_1, Catalytic domain, repeat 1, of Tyrosyl-DNA phosphodiesterase. Catalytic domain, repeat 1, of Tyrosyl-DNA phosphodiesterase (Tdp1, EC 3.1.4.-), which exists in eukaryotes but not in prokaryotes. Tdp1 acts as an important DNA repair enzyme that removes stalled topoisomerase I-DNA complexes by catalyzing the hydrolysis of a phosphodiester bond between a tyrosine side chain and …	pfam06087, Tyr-DNA_phospho, Tyrosyl-DNA phosphodiesterase. Covalent intermediates between topoisomerase I and DNA can become dead-end complexes that lead to cell death. Tyrosyl-DNA phosphodiesterase can hydrolyze the bond between topoisomerase I and DNA. 2.52e-20	-	KOG2031, KOG2031, KOG2031, Tyrosyl-DNA phosphodiesterase [Replication, recombination and repair]. 3.17e-06	-	-	CAH0752549.1 unnamed protein product [Bemisia tabaci] 2.24e-66	-
TRINITY_DN9450_c0_g1	3.17852	16.3558	-2.36338	0.00308687	0.0200292	down	-	-	-	-	-	-	-	-
TRINITY_DN18096_c0_g1	4.5453	23.3524	-2.36113	0.00364203	0.0226677	down	-	pfam04828, GFA, Glutathione-dependent formaldehyde-activating enzyme. The GFA enzyme catalyzes the first step in the detoxification of formaldehyde. This domain has a beta-tent fold. 6.04e-15	-	-	-	-	CAF1472113.1 unnamed protein product [Adineta steineri] 1.27e-18	-
TRINITY_DN21326_c0_g1	8.40448	43.1403	-2.35981	0.00624842	0.0343975	down	-	-	-	-	-	-	-	-
TRINITY_DN10335_c0_g1	9.29769	47.6764	-2.35833	0.00031491	0.00330538	down	cd01941, YeiC_kinase_like, YeiC-like sugar kinase. Found in eukaryotes and bacteria, YeiC-like kinase is part of the ribokinase/pfkB sugar kinase superfamily. Its oligomerization state is unknown at this time. 6.78e-28	pfam04227, Indigoidine_A, Indigoidine synthase A like protein. Indigoidine is a blue pigment synthesized by Erwinia chrysanthemi implicated in pathogenicity and protection from oxidative stress. IdgA is involved in indigoidine biosynthesis, but its specific function is unknown. The recommended name for this protein is now pseudouridine-5'-phosphate glycosidase. 5.82e-94	K16330-ko00240 Pyrimidine metabolism	KOG3009, KOG3009, KOG3009, Predicted carbohydrate kinase, contains PfkB domain [General function prediction only]. 3.75e-70	sp|Q9USY1|YOW5_SCHPO Pseudouridine-metabolizing bifunctional protein C1861.05 OS=Schizosaccharomyces pombe (strain 972 / ATCC 24843) GN=SPBC1861.05 PE=3 SV=1 1.05e-105	GO:0001522, pseudouridine synthesis;GO:0003674, molecular_function;GO:0003824, catalytic activity;GO:0004730, pseudouridylate synthase activity;GO:0006139, nucleobase-containing compound metabolic process;GO:0006213, pyrimidine nucleoside metabolic process;GO:0006725, cellular aromatic compound metabolic process;GO:0006793, phosphorus metabolic process;GO:0006796, phosphate-containing compound me…	XP_015246498.1 PREDICTED: pseudouridine-metabolizing bifunctional protein C1861.05-like [Cyprinodon variegatus] 1.55e-93	-
TRINITY_DN1948_c0_g1	2.02252	10.3676	-2.35785	0.000573559	0.0053884	down	-	-	-	-	-	-	-	-
TRINITY_DN12269_c0_g1	0.65813	3.37127	-2.35685	0.00179224	0.0132449	down	-	pfam03328, HpcH_HpaI, HpcH/HpaI aldolase/citrate lyase family. This family includes 2,4-dihydroxyhept-2-ene-1,7-dioic acid aldolase and 4-hydroxy-2-oxovalerate aldolase. 1.06e-09	-	-	sp|A9N5C4|RHMA_SALPB 2-keto-3-deoxy-L-rhamnonate aldolase OS=Salmonella paratyphi B (strain ATCC BAA-1250 / SPB7) GN=rhmA PE=3 SV=1 5.87e-18	-	MCL4105418.1 hypothetical protein [Idotea baltica] 4.25e-16	-
TRINITY_DN9355_c0_g1	1.66015	8.48397	-2.35343	0.00027992	0.00298495	down	-	pfam02129, Peptidase_S15, X-Pro dipeptidyl-peptidase (S15 family). 5.92e-22	-	-	sp|Q9L9D7|COCE_RHOSM Cocaine esterase OS=Rhodococcus sp. (strain MB1 Bresler) GN=cocE PE=1 SV=1 1.55e-20	-	XP_028402708.1 uncharacterized protein LOC114525526 [Dendronephthya gigantea] 4.23e-158	-
TRINITY_DN12434_c0_g1	15.7529	80.4539	-2.35254	0.000716911	0.00641546	down	-	pfam02738, Ald_Xan_dh_C2, Molybdopterin-binding domain of aldehyde dehydrogenase. 7.73e-139	K00106-ko00232 Caffeine metabolism;ko04146 Peroxisome;ko00983 Drug metabolism - other enzymes;ko00230 Purine metabolism	KOG0430, KOG0430, KOG0430, Xanthine dehydrogenase [Nucleotide transport and metabolism]. 0.0	sp|Q12553|XDH_EMENI Xanthine dehydrogenase OS=Emericella nidulans (strain FGSC A4 / ATCC 38163 / CBS 112.46 / NRRL 194 / M139) GN=hxA PE=2 SV=2 0.0	GO:0000166, nucleotide binding;GO:0003674, molecular_function;GO:0003824, catalytic activity;GO:0004854, xanthine dehydrogenase activity;GO:0005488, binding;GO:0005575, cellular_component;GO:0005622, intracellular;GO:0005623, cell;GO:0005737, cytoplasm;GO:0005829, cytosol;GO:0006139, nucleobase-containing compound metabolic process;GO:0006144, purine nucleobase metabolic process;GO:0006145, purin…	XP_688983.3 xanthine dehydrogenase/oxidase [Danio rerio] 0.0	-
TRINITY_DN14484_c0_g1	8.24626	42.0649	-2.35081	0.00257571	0.0174613	down	-	pfam03690, UPF0160, Uncharacterized protein family (UPF0160). This family of proteins contains a large number of metal binding residues. The patterns are suggestive of a phosphoesterase function. The conserved DHH motif may mean this family is related to pfam01368. 5.07e-119	-	KOG2948, KOG2948, KOG2948, Predicted metal-binding protein [General function prediction only]. 1.29e-106	sp|Q58DG1|MYG1_BOVIN UPF0160 protein MYG1, mitochondrial OS=Bos taurus PE=2 SV=1 1.26e-96	GO:0003674, molecular_function;GO:0003824, catalytic activity;GO:0005575, cellular_component;GO:0005622, intracellular;GO:0005623, cell;GO:0005634, nucleus;GO:0005737, cytoplasm;GO:0005739, mitochondrion;GO:0016787, hydrolase activity;GO:0043226, organelle;GO:0043227, membrane-bounded organelle;GO:0043229, intracellular organelle;GO:0043231, intracellular membrane-bounded organelle;GO:0044424, in…	XP_002711173.1 MYG1 exonuclease [Oryctolagus cuniculus] 2.46e-104	-
TRINITY_DN7721_c0_g1	5.13677	26.1863	-2.34988	0.000591716	0.00552225	down	-	-	-	-	-	-	CAF3905357.1 unnamed protein product [Rotaria sp. Silwood1] 2.18e-07	-
TRINITY_DN11594_c0_g1	20.3908	103.886	-2.34901	0.002274	0.0158036	down	cd08157, catalase_fungal, Fungal catalases similar to yeast catalases A and T. Catalase is a ubiquitous enzyme found in both prokaryotes and eukaryotes, which is involved in the protection of cells from the toxic effects of peroxides. It catalyzes the conversion of hydrogen peroxide to water and molecular oxygen. Catalases also utilize hydrogen peroxide to oxidize various substrates such as alcoh…	pfam00199, Catalase, Catalase. 9.19e-10	K03781-ko04011 MAPK signaling pathway - yeast;ko01200 Carbon metabolism;ko00630 Glyoxylate and dicarboxylate metabolism;ko04212 Longevity regulating pathway - worm;ko04211 Longevity regulating pathway - mammal;ko04146 Peroxisome;ko00380 Tryptophan metabolism;ko04213 Longevity regulating pathway - multiple species;ko04068 FoxO signaling pathway	KOG0047, KOG0047, KOG0047, Catalase [Inorganic ion transport and metabolism]. 2.98e-118	sp|O13289|CATA_CANAL Peroxisomal catalase OS=Candida albicans (strain SC5314 / ATCC MYA-2876) GN=CTA1 PE=2 SV=4 1.05e-126	GO:0000302, response to reactive oxygen species;GO:0001306, age-dependent response to oxidative stress;GO:0001315, age-dependent response to reactive oxygen species;GO:0003674, molecular_function;GO:0003824, catalytic activity;GO:0004096, catalase activity;GO:0004601, peroxidase activity;GO:0005488, binding;GO:0005575, cellular_component;GO:0005618, cell wall;GO:0005622, intracellular;GO:0005623,…	VEN55345.1 unnamed protein product, partial [Callosobruchus maculatus] 1.00e-112	-
TRINITY_DN7604_c0_g1	1.12598	5.73198	-2.34786	0.00293911	0.0192771	down	-	-	-	-	-	-	-	-
TRINITY_DN11223_c0_g1	11.5326	58.6614	-2.3467	0.000258439	0.00279101	down	cd07233, GlxI_Zn, Glyoxalase I that uses Zn(++) as cofactor. This family includes eukaryotic glyoxalase I that prefers the divalent cation zinc as cofactor. Glyoxalase I (also known as lactoylglutathione lyase; EC 4.4.1.5) is part of the glyoxalase system, a two-step system for detoxifying methylglyoxal, a side product of glycolysis. This system is responsible for the conversion of reactive, acyc…	-	K01759-ko00620 Pyruvate metabolism	KOG2944, KOG2944, KOG2944, Glyoxalase [Carbohydrate transport and metabolism]. 9.35e-23	sp|Q09751|LGUL_SCHPO Lactoylglutathione lyase OS=Schizosaccharomyces pombe (strain 972 / ATCC 24843) GN=glo1 PE=1 SV=1 1.10e-10	GO:0003674, molecular_function;GO:0003824, catalytic activity;GO:0004462, lactoylglutathione lyase activity;GO:0005488, binding;GO:0005575, cellular_component;GO:0005622, intracellular;GO:0005623, cell;GO:0005634, nucleus;GO:0005737, cytoplasm;GO:0006081, cellular aldehyde metabolic process;GO:0006082, organic acid metabolic process;GO:0006089, lactate metabolic process;GO:0006518, peptide metabo…	KPJ02040.1 Lactoylglutathione lyase [Papilio xuthus] 6.99e-56	-
TRINITY_DN11075_c0_g1	13.4519	68.3031	-2.34414	8.15032e-05	0.00106364	down	cd05540, UreG, urease accessory protein UreG. UreG is one of the four accessory proteins of urease. Urease is an enzyme which catalyzes the decomposition of urea to form ammonia and carbon dioxide. Bacterial urease is a trimer of three subunits which are encoded by genes ureA, ureB, and ureC. Up to four accessory proteins (ureD, ureE, ureF, and ureG) are required for urease catalytical function. …	pfam02492, cobW, CobW/HypB/UreG, nucleotide-binding domain. This domain is found in HypB, a hydrogenase expression / formation protein, and UreG a urease accessory protein. Both these proteins contain a P-loop nucleotide binding motif. HypB has GTPase activity and is a guanine nucleotide binding protein. It is not known whether UreG binds GTP or some other nucleotide. Both enzymes are involved in…	-	-	sp|E0ZS47|UREG_ORYSI Urease accessory protein G OS=Oryza sativa subsp. indica GN=UREG PE=2 SV=1 2.52e-96	GO:0006807, nitrogen compound metabolic process;GO:0008150, biological_process;GO:0008152, metabolic process;GO:0009987, cellular process;GO:0019627, urea metabolic process;GO:0034641, cellular nitrogen compound metabolic process;GO:0043603, cellular amide metabolic process;GO:0044237, cellular metabolic process;GO:0044281, small molecule metabolic process;GO:0071704, organic substance metabolic …	KAJ3013034.1 hypothetical protein HDU68_000898 [Siphonaria sp. JEL0065] 1.66e-93	PREDICTED: Dermacentor andersoni urease accessory protein UreG-like (LOC126519042), mRNA 1.81e-74
TRINITY_DN4296_c0_g1	4.19419	21.255	-2.34134	0.000299142	0.00316602	down	-	-	-	-	-	-	-	-
TRINITY_DN11600_c0_g2	8.47999	42.9617	-2.34092	0.000204311	0.00230434	down	-	-	-	-	-	-	XP_018899945.1 PREDICTED: uncharacterized protein LOC109032327 [Bemisia tabaci] 1.38e-24	-
TRINITY_DN10143_c0_g1	2.84611	14.4097	-2.33998	0.000892811	0.00759098	down	-	-	-	-	-	-	-	-
TRINITY_DN13849_c4_g1	3.41484	17.2781	-2.33905	0.000472423	0.00460151	down	cd05269, TMR_SDR_a, triphenylmethane reductase (TMR)-like proteins, NMRa-like, atypical (a) SDRs. TMR is an atypical NADP-binding protein of the SDR family. It lacks the active site residues of the SDRs but has a glycine rich NAD(P)-binding motif that matches the extended SDRs. Proteins in this subgroup however, are more similar in length to the classical SDRs. TMR was identified as a reducer of …	-	-	-	sp|Q4WZ69|EASG_ASPFU Festuclavine dehydrogenase easG OS=Neosartorya fumigata (strain ATCC MYA-4609 / Af293 / CBS 101355 / FGSC A1100) GN=easG PE=1 SV=1 8.90e-39	-	CAD5205487.1 unnamed protein product [Bursaphelenchus okinawaensis] >CAG9077644.1 unnamed protein product [Bursaphelenchus okinawaensis] 6.77e-08	-
TRINITY_DN13090_c0_g1	42.0528	212.502	-2.3372	7.56802e-05	0.000998931	down	cd01999, Argininosuccinate_Synthase, Argininosuccinate synthase. The Argininosuccinate synthase is a urea cycle enzyme that catalyzes the penultimate step in arginine biosynthesis: the ATP-dependent ligation of citrulline to aspartate to form argininosuccinate, AMP and pyrophosphate . In humans, a defect in the AS gene causes citrullinemia, a genetic disease characterized by severe vomiting spell…	pfam00764, Arginosuc_synth, Arginosuccinate synthase. This family contains a PP-loop motif. 6.62e-89	K01940-ko00220 Arginine biosynthesis;ko01230 Biosynthesis of amino acids;ko00250 Alanine, aspartate and glutamate metabolism	KOG1706, KOG1706, KOG1706, Argininosuccinate synthase [Amino acid transport and metabolism]. 3.13e-135	sp|P22768|ASSY_YEAST Argininosuccinate synthase OS=Saccharomyces cerevisiae (strain ATCC 204508 / S288c) GN=ARG1 PE=1 SV=3 1.51e-136	-	XP_048822306.1 argininosuccinate synthase [Lagopus muta] 1.54e-127	-
TRINITY_DN12734_c0_g1	1.18555	5.9894	-2.33686	0.000443291	0.00436796	down	cd01154, AidB, Proteins involved in DNA damage response, similar to the AidB gene product. AidB is one of several genes involved in the SOS adaptive response to DNA alkylation damage, whose expression is activated by the Ada protein. Its function has not been entirely elucidated; however, it is similar in sequence and function to acyl-CoA dehydrogenases. It has been proposed that aidB directly de…	-	-	-	sp|Q9XWZ2|ACD11_CAEEL Acyl-CoA dehydrogenase family member 11 OS=Caenorhabditis elegans GN=acdh-11 PE=1 SV=1 6.55e-51	-	XP_029960378.1 acyl-CoA dehydrogenase family member 11-like [Salarias fasciatus] 4.19e-69	-
TRINITY_DN7166_c0_g1	5.88458	29.7113	-2.336	8.11065e-05	0.00105955	down	-	-	-	KOG4300, KOG4300, KOG4300, Predicted methyltransferase [General function prediction only]. 1.69e-08	sp|Q9H8H3|MET7A_HUMAN Methyltransferase-like protein 7A OS=Homo sapiens GN=METTL7A PE=1 SV=1 4.31e-06	-	XP_029639047.1 methyltransferase-like protein 7A [Octopus sinensis] 3.29e-12	-
TRINITY_DN13385_c0_g2	2.45366	12.3802	-2.33503	0.000653079	0.00599804	down	-	-	-	-	-	-	-	-
TRINITY_DN7655_c0_g1	1.31836	6.64931	-2.33446	0.00117457	0.00945535	down	-	pfam04828, GFA, Glutathione-dependent formaldehyde-activating enzyme. The GFA enzyme catalyzes the first step in the detoxification of formaldehyde. This domain has a beta-tent fold. 3.64e-10	-	-	-	-	-	-
TRINITY_DN11060_c0_g1	7.28225	36.6812	-2.33258	0.0091364	0.0457576	down	-	-	-	-	-	-	-	-
TRINITY_DN12471_c0_g1	1.35969	6.82025	-2.32654	0.000945787	0.00791462	down	-	pfam01341, Glyco_hydro_6, Glycosyl hydrolases family 6. 2.55e-103	K19668-ko00500 Starch and sucrose metabolism;ko02020 Two-component system	-	sp|P07987|GUX2_HYPJE Exoglucanase 2 OS=Hypocrea jecorina GN=cbh2 PE=1 SV=1 0.0	GO:0000272, polysaccharide catabolic process;GO:0003674, molecular_function;GO:0003824, catalytic activity;GO:0004553, hydrolase activity, hydrolyzing O-glycosyl compounds;GO:0005975, carbohydrate metabolic process;GO:0005976, polysaccharide metabolic process;GO:0008150, biological_process;GO:0008152, metabolic process;GO:0009056, catabolic process;GO:0009057, macromolecule catabolic process;GO:0…	AKC91346.1 glycoside hydrolase 45 [Adineta ricciae] >CAF0854754.1 unnamed protein product [Adineta ricciae] >CAF1334641.1 unnamed protein product [Adineta ricciae] 3.07e-08	-
TRINITY_DN13211_c0_g1	56.6585	284.199	-2.32653	3.50419e-05	0.000520956	down	cd00305, Cu-Zn_Superoxide_Dismutase, Copper/zinc superoxide dismutase (SOD). superoxide dismutases catalyse the conversion of superoxide radicals to molecular oxygen. Three evolutionarily distinct families of SODs are known, of which the copper/zinc-binding family is one. Defects in the human SOD1 gene causes familial amyotrophic lateral sclerosis (Lou Gehrig's disease). Cytoplasmic and periplasm…	pfam00080, Sod_Cu, Copper/zinc superoxide dismutase (SODC). superoxide dismutases (SODs) catalyze the conversion of superoxide radicals to hydrogen peroxide and molecular oxygen. Three evolutionarily distinct families of SODs are known, of which the copper/zinc-binding family is one. Defects in the human SOD1 gene cause familial amyotrophic lateral sclerosis (Lou Gehrig's disease). Structure is a…	K04565-ko04146 Peroxisome;ko04213 Longevity regulating pathway - multiple species	KOG0441, KOG0441, KOG0441, Cu2+/Zn2+ superoxide dismutase SOD1 [Inorganic ion transport and metabolism]. 4.19e-49	sp|Q711T9|SODC_PODAS Superoxide dismutase [Cu-Zn] OS=Podospora anserina GN=SOD1 PE=3 SV=3 2.91e-79	GO:0000302, response to reactive oxygen species;GO:0000303, response to superoxide;GO:0000305, response to oxygen radical;GO:0003674, molecular_function;GO:0003824, catalytic activity;GO:0004784, superoxide dismutase activity;GO:0005488, binding;GO:0005507, copper ion binding;GO:0005575, cellular_component;GO:0005576, extracellular region;GO:0005615, extracellular space;GO:0005622, intracellular;…	QRW45201.1 superoxide dismutase [Cu-Zn]-like protein [Macrosiphum euphorbiae] 4.06e-65	-
TRINITY_DN13808_c0_g3	41.6625	208.722	-2.32476	0.00653493	0.0354126	down	cd05374, 17beta-HSD-like_SDR_c, 17beta hydroxysteroid dehydrogenase-like, classical (c) SDRs. 17beta-hydroxysteroid dehydrogenases are a group of isozymes that catalyze activation and inactivation of estrogen and androgens. SDRs are a functionally diverse family of oxidoreductases that have a single domain with a structurally conserved Rossmann fold (alpha/beta folding pattern with a central beta…	pfam00106, adh_short, short chain dehydrogenase. This family contains a wide variety of dehydrogenases. 1.29e-19	K10352-ko04530 Tight junction	KOG1209, KOG1209, KOG1209, 1-Acyl dihydroxyacetone phosphate reductase and related dehydrogenases [Secondary metabolites biosynthesis, transport and catabolism]. 2.53e-21	sp|Q09851|AYR1_SCHPO NADPH-dependent 1-acyldihydroxyacetone phosphate reductase OS=Schizosaccharomyces pombe (strain 972 / ATCC 24843) GN=ayr1 PE=3 SV=2 6.63e-28	-	XP_007450305.1 PREDICTED: NADPH-dependent 1-acyldihydroxyacetone phosphate reductase-like, partial [Lipotes vexillifer] 3.86e-22	-
TRINITY_DN7437_c0_g1	1.3366	6.69529	-2.32458	0.00655208	0.03547	down	-	pfam05630, NPP1, Necrosis inducing protein (NPP1). This family consists of several NPP1 like necrosis inducing proteins from oomycetes, fungi and bacteria. Infiltration of NPP1 into leaves of Arabidopsis thaliana plants result in transcript accumulation of pathogenesis-related (PR) genes, production of ROS and ethylene, callose apposition, and HR-like cell death. 3.63e-45	-	-	-	-	-	-
TRINITY_DN13717_c0_g1	3.02242	15.1251	-2.32316	0.00111414	0.00904335	down	cd00833, PKS, polyketide synthases (PKSs) polymerize simple fatty acids into a large variety of different products, called polyketides, by successive decarboxylating Claisen condensations. PKSs can be divided into 2 groups, modular type I PKSs consisting of one or more large multifunctional proteins and iterative type II PKSs, complexes of several monofunctional subunits. 9.80e-102	pfam00109, ketoacyl-synt, Beta-ketoacyl synthase, N-terminal domain. The structure of beta-ketoacyl synthase is similar to that of the thiolase family (pfam00108) and also chalcone synthase. The active site of beta-ketoacyl synthase is located between the N and C-terminal domains. The N-terminal domain contains most of the structures involved in dimer formation and also the active site cysteine. …	-	KOG1202, KOG1202, KOG1202, Animal-type fatty acid synthase and related proteins [Lipid transport and metabolism]. 7.85e-49	sp|Q8J0F5|MLCB_PENCI Compactin diketide synthase mokB OS=Penicillium citrinum GN=mlcB PE=1 SV=1 0.0	-	CAH1230559.1 FASN [Branchiostoma lanceolatum] 8.45e-240	-
TRINITY_DN11146_c0_g1	2.15035	10.7542	-2.32225	0.00367284	0.0227956	down	-	-	-	-	-	-	XP_039301574.1 uncharacterized protein LOC120356678 [Nilaparvata lugens] 1.50e-13	-
TRINITY_DN10637_c0_g2	2.32825	11.6327	-2.32087	0.00604343	0.0335243	down	-	-	-	-	-	-	-	-
TRINITY_DN13485_c0_g3	52.5089	262.256	-2.32034	0.000966954	0.00804908	down	cd19122, AKR_AKR3E1, AKR3E family of aldo-keto reductase (AKR). Trichoderma reesei NADP(+)-dependent glycerol 2-dehydrogenase (GLD2, EC 1.1.1.156), also called dihydroxyacetone reductase, is a founding member of aldo-keto reductase family 3 member E1 (AKR3E1). It acts as a glycerol oxidoreductase probably involved in glycerol synthesis. 3.02e-156	pfam00248, Aldo_ket_red, Aldo/keto reductase family. This family includes a number of K+ ion channel beta chain regulatory domains - these are reported to have oxidoreductase activity. 1.60e-23	-	KOG1577, KOG1577, KOG1577, Aldo/keto reductase family proteins [General function prediction only]. 1.42e-73	sp|Q0GYU4|GLD2_HYPJE Glycerol 2-dehydrogenase (NADP(+)) OS=Hypocrea jecorina GN=gld2 PE=1 SV=1 2.81e-160	-	XP_022117672.2 aldo-keto reductase family 1 member B1 isoform X2 [Pieris rapae] 8.05e-64	-
TRINITY_DN12812_c0_g2	33.4272	166.914	-2.32001	0.00181622	0.0133853	down	-	-	-	-	-	-	-	-
TRINITY_DN10481_c0_g2	388.885	1941.53	-2.31978	0.000443881	0.00437039	down	cd17321, MFS_MMR_MDR_like, Methylenomycin A resistance protein (also called MMR peptide) and similar multidrug resistance (MDR) transporters of the Major Facilitator Superfamily. This family is composed of bacterial, fungal, and archaeal multidrug resistance (MDR) transporters including several proteins from Bacilli such as methylenomycin A resistance protein (also called MMR peptide), tetracycli…	-	-	-	sp|P9WG87|Y1250_MYCTU Uncharacterized MFS-type transporter Rv1250 OS=Mycobacterium tuberculosis (strain ATCC 25618 / H37Rv) GN=Rv1250 PE=3 SV=1 1.59e-20	-	KAJ3013035.1 hypothetical protein HDU68_000899 [Siphonaria sp. JEL0065] 8.76e-63	-
TRINITY_DN11231_c0_g1	55.482	276.828	-2.3189	0.000264582	0.00284768	down	cd03141, GATase1_Hsp31_like, Type 1 glutamine amidotransferase (GATase1)-like domain found in proteins similar to Escherichia coli Hsp31 protein. Type 1 glutamine amidotransferase (GATase1)-like domain found in proteins similar to Escherichia coli Hsp31 protein (EcHsp31). This group includes EcHsp31 and Saccharomyces cerevisiae Ydr533c protein. EcHsp31 has chaperone activity. Ydr533c is upregulat…	-	-	-	sp|Q5AF03|HSP31_CANAL Glyoxalase 3 OS=Candida albicans (strain SC5314 / ATCC MYA-2876) GN=GLX3 PE=1 SV=1 1.82e-14	-	UJR34909.1 hypothetical protein I4U23_027687 [Adineta vaga] 8.64e-49	-
TRINITY_DN1570_c0_g1	2.97476	14.8405	-2.31869	0.00949848	0.0469984	down	-	-	-	-	-	-	-	-
TRINITY_DN9066_c0_g2	19.3901	96.6917	-2.31807	0.002283	0.0158575	down	-	-	-	-	-	-	-	-
TRINITY_DN13161_c0_g1	13.3857	66.6864	-2.3167	1.23045e-05	0.000216026	down	cd01393, RecA-like, RecA family. RecA is a bacterial enzyme which has roles in homologous recombination, DNA repair, and the induction of the SOS response. RecA couples ATP hydrolysis to DNA strand exchange. While prokaryotes have a single RecA protein, eukaryotes have multiple RecA homologs such as Rad51, DMC1 and Rad55/57. Archaea have the RecA-like homologs RadA and RadB. 6.26e-19	-	-	-	-	GO:0000003, reproduction;GO:0000018, regulation of DNA recombination;GO:0000150, recombinase activity;GO:0000166, nucleotide binding;GO:0000217, DNA secondary structure binding;GO:0000280, nuclear division;GO:0000400, four-way junction DNA binding;GO:0000707, meiotic DNA recombinase assembly;GO:0000709, meiotic joint molecule formation;GO:0000724, double-strand break repair via homologous recombi…	-	-
TRINITY_DN10454_c0_g1	2.13807	10.642	-2.31539	0.000562265	0.00530583	down	-	pfam11905, DUF3425, Domain of unknown function (DUF3425). This presumed domain is functionally uncharacterized. This domain is found in eukaryotes. This domain is typically between 120 to 143 amino acids in length. 2.54e-06	-	-	sp|D7UQ40|SOL5_ALTSO Bifunctional solanapyrone synthase OS=Alternaria solani GN=sol5 PE=1 SV=1 2.61e-11	-	CAF4389920.1 unnamed protein product, partial [Adineta steineri] 2.54e-08	-
TRINITY_DN12538_c0_g1	16.2951	81.0179	-2.3138	3.18204e-05	0.00048266	down	-	-	-	-	-	-	-	-
[truncated: 1,604 more rows]
