# Supplementary material for: The Response of Growth and Transcriptome Profiles of Tea Grey Blight Disease Pathogen Pestalotiopsis theae to the Variation of Exogenous L-Theanine
Source: Int J Mol Sci. 2024 Mar 20;25(6):3493. doi: 10.3390/ijms25063493 (PMC10971465; doi:10.3390/ijms25063493)
Supplement: Supplementary file 1 [file ijms-25-03493-s001.zip › ijms-2863686-supplementary/Supplemental Table S4.xlsx]

## Sheet: Th4 vs. Th0
Table S4. DEGs of Th4 vs. Th0 comparison group
Gene id	MeanTPM (Th4)	MeanTPM (Th0)	log2FoldChange	p_Value	QValue	result	CDD	PFAM	KEGG	KOG	Swissprot	GO	NR	NT
TRINITY_DN9213_c0_g2	3.83449	9.28021	-1.27512	0.00473625	0.0213147	down	-	-	-	KOG2665, KOG2665, KOG2665, Predicted FAD-dependent oxidoreductase [Function unknown]. 2.41e-34	sp|P37339|LHGO_ECOLI L-2-hydroxyglutarate oxidase LhgO OS=Escherichia coli (strain K12) GN=lhgO PE=1 SV=3 3.04e-27	-	XP_040091681.1 L-2-hydroxyglutarate dehydrogenase, mitochondrial-like [Oryx dammah] 1.67e-61	-
TRINITY_DN12351_c0_g1	29.5089	13.5014	1.12804	0.00578709	0.0251923	up	-	-	-	-	sp|Q01578|GNL_ZYMMO Gluconolactonase OS=Zymomonas mobilis subsp. mobilis (strain ATCC 31821 / ZM4 / CP4) GN=gnl PE=1 SV=2 9.22e-06	-	CAF1451567.1 unnamed protein product [Didymodactylos carnosus] >CAF1523787.1 unnamed protein product [Didymodactylos carnosus] >CAF4246164.1 unnamed protein product [Didymodactylos carnosus] >CAF4382915.1 unnamed protein product [Didymodactylos carnosus] 1.41e-15	-
TRINITY_DN13887_c2_g4	3.34028	0.337161	3.30846	0.00169776	0.00890397	up	-	-	-	-	-	-	-	-
TRINITY_DN13887_c2_g2	1.47431	5.25547	-1.83378	0.000594047	0.00357092	down	-	-	-	-	-	-	-	-
TRINITY_DN13887_c2_g3	0.651382	3.99145	-2.61534	0.000668866	0.00397272	down	-	-	-	-	-	-	-	-
TRINITY_DN12185_c0_g1	1.72448	12.9511	-2.90884	5.8219e-10	1.05651e-08	down	-	pfam06516, NUP, Purine nucleoside permease (NUP). This family consists of several purine nucleoside permease from both bacteria and fungi. 3.14e-94	-	-	sp|O93844|NUP_CANAX Purine nucleoside permease OS=Candida albicans GN=NUP PE=3 SV=1 1.19e-76	GO:0003674, molecular_function;GO:0005215, transporter activity;GO:0005337, nucleoside transmembrane transporter activity;GO:0005575, cellular_component;GO:0006810, transport;GO:0006811, ion transport;GO:0006812, cation transport;GO:0008150, biological_process;GO:0008324, cation transmembrane transporter activity;GO:0015075, ion transmembrane transporter activity;GO:0015077, monovalent inorganic …	KMQ91383.1 purine nucleoside permease [Lasius niger] 2.79e-14	-
TRINITY_DN7282_c0_g1	0.616869	6.44998	-3.38626	1.94188e-09	3.27894e-08	down	cd07999, GH7_CBH_EG, Glycosyl hydrolase family 7. Glycosyl hydrolase family 7 contains eukaryotic endoglucanases (EGs) and cellobiohydrolases (CBHs) that hydrolyze glycosidic bonds using a double-displacement mechanism. This leads to a net retention of the conformation at the anomeric carbon. Both enzymes work synergistically in the degradation of cellulose,which is the main component of plant ce…	pfam00840, Glyco_hydro_7, Glycosyl hydrolase family 7. 3.22e-173	K01225-ko00500 Starch and sucrose metabolism	-	sp|Q7SA23|GUX1A_NEUCR Exoglucanase 1 OS=Neurospora crassa (strain ATCC 24698 / 74-OR23-1A / CBS 708.71 / DSM 1257 / FGSC 987) GN=cbh-1 PE=3 SV=1 3.75e-172	-	XP_018027108.1 exoglucanase GH7B-like [Hyalella azteca] >KAA0201488.1 Glycosyl Hydrolase 7 [Hyalella azteca] 5.89e-149	-
TRINITY_DN11060_c0_g1	4.55777	36.6812	-3.00864	1.34835e-13	3.7384e-12	down	-	-	-	-	-	-	-	-
TRINITY_DN17141_c0_g1	1.23179	7.63473	-2.63182	0.000202531	0.00138673	down	-	pfam04248, NTP_transf_9, Domain of unknown function (DUF427). This domain contains a beta-tent fold. 6.06e-17	-	-	-	-	-	-
TRINITY_DN6793_c0_g1	3.77034	40.1208	-3.41158	4.71273e-07	5.62807e-06	down	cd18820, GH43_LbAraf43-like, Glycosyl hydrolase family 43 proteins similar to Lactobacillus brevis alpha-L-arabinofuranosidase LbAraf43 and Geobacillus thermoleovorans GbtXyl43B. This uncharacterized glycosyl hydrolase family 43 (GH43) subgroup belongs to a subgroup which includes enzymes with beta-xylosidase (EC 3.2.1.37), alpha-L-arabinofuranosidase (EC 3.2.1.55) and possibly bifunctional xylos…	pfam04616, Glyco_hydro_43, Glycosyl hydrolases family 43. The glycosyl hydrolase family 43 contains members that are arabinanases. Arabinanases hydrolyze the alpha-1,5-linked L-arabinofuranoside backbone of plant cell wall arabinans. The structure of arabinanase Arb43A from Cellvibrio japonicus reveals a five-bladed beta-propeller fold. A long V-shaped groove, partially enclosed at one end, forms…	-	-	sp|P82594|IABF_STRCX Extracellular exo-alpha-(1->5)-L-arabinofuranosidase OS=Streptomyces chartreusis PE=1 SV=1 5.51e-29	-	CAG7718763.1 unnamed protein product [Allacma fusca] 1.02e-53	-
TRINITY_DN12434_c0_g1	37.6393	80.4539	-1.09592	0.00778233	0.0320517	down	-	pfam02738, Ald_Xan_dh_C2, Molybdopterin-binding domain of aldehyde dehydrogenase. 7.73e-139	K00106-ko00232 Caffeine metabolism;ko04146 Peroxisome;ko00983 Drug metabolism - other enzymes;ko00230 Purine metabolism	KOG0430, KOG0430, KOG0430, Xanthine dehydrogenase [Nucleotide transport and metabolism]. 0.0	sp|Q12553|XDH_EMENI Xanthine dehydrogenase OS=Emericella nidulans (strain FGSC A4 / ATCC 38163 / CBS 112.46 / NRRL 194 / M139) GN=hxA PE=2 SV=2 0.0	GO:0000166, nucleotide binding;GO:0003674, molecular_function;GO:0003824, catalytic activity;GO:0004854, xanthine dehydrogenase activity;GO:0005488, binding;GO:0005575, cellular_component;GO:0005622, intracellular;GO:0005623, cell;GO:0005737, cytoplasm;GO:0005829, cytosol;GO:0006139, nucleobase-containing compound metabolic process;GO:0006144, purine nucleobase metabolic process;GO:0006145, purin…	XP_688983.3 xanthine dehydrogenase/oxidase [Danio rerio] 0.0	-
TRINITY_DN3297_c0_g1	1.53765	8.15023	-2.40611	0.0102056	0.0399984	down	cd01846, fatty_acyltransferase_like, Fatty acyltransferase-like subfamily of the SGNH hydrolases, a diverse family of lipases and esterases. The tertiary fold of the enzyme is substantially different from that of the alpha/beta hydrolase family and unique among all known hydrolases; its active site closely resembles the Ser-His-Asp(Glu) triad found in other serine hydrolases. Might catalyze fatty…	-	-	-	sp|T2FKR1|AES1_THIHE Acetylesterase OS=Thielavia heterothallica GN=aes1 PE=1 SV=1 8.71e-18	-	UJR13476.1 hypothetical protein I4U23_000490 [Adineta vaga] 9.30e-11	-
TRINITY_DN10495_c0_g1	19.1786	90.084	-2.23177	0.00127145	0.00693036	down	-	-	-	-	-	-	-	-
TRINITY_DN26691_c0_g1	0.141263	3.08452	-4.44859	7.95322e-05	0.000598138	down	cd05259, PCBER_SDR_a, phenylcoumaran benzylic ether reductase (PCBER) like, atypical (a) SDRs. PCBER and pinoresinol-lariciresinol reductases are NADPH-dependent aromatic alcohol reductases, and are atypical members of the SDR family. Other proteins in this subgroup are identified as eugenol synthase. These proteins contain an N-terminus characteristic of NAD(P)-binding proteins and a small C-ter…	pfam05368, NmrA, NmrA-like family. NmrA is a negative transcriptional regulator involved in the post-translational modification of the transcription factor AreA. NmrA is part of a system controlling nitrogen metabolite repression in fungi. This family only contains a few sequences as iteration results in significant matches to other Rossmann fold families. 1.97e-14	-	-	sp|P52577|IFRH_ARATH Isoflavone reductase homolog P3 OS=Arabidopsis thaliana GN=At1g75280 PE=2 SV=1 1.37e-10	-	CAF1326919.1 unnamed protein product [Didymodactylos carnosus] >CAF1635078.1 unnamed protein product [Didymodactylos carnosus] >CAF4138294.1 unnamed protein product [Didymodactylos carnosus] >CAF4539212.1 unnamed protein product [Didymodactylos carnosus] 1.84e-46	-
TRINITY_DN11146_c0_g1	0.605848	10.7542	-4.14979	8.71034e-13	2.21414e-11	down	-	-	-	-	-	-	XP_039301574.1 uncharacterized protein LOC120356678 [Nilaparvata lugens] 1.50e-13	-
TRINITY_DN11945_c0_g1	156.275	73.3774	1.09068	0.00012593	0.000904583	up	cd11041, CYP503A1-like, cytochrome P450 family 503, subfamily A, polypeptide 1 and similar cytochrome P450s. This family is composed of predominantly fungal cytochrome P450s (CYPs) with similarity to Fusarium fujikuroi Cytochrome P450 503A1 (CYP503A1, also called ent-kaurene oxidase or cytochrome P450-4), Aspergillus nidulans austinol synthesis protein I (ausI), Alternaria alternata tentoxin synt…	pfam00067, p450, Cytochrome P450. Cytochrome P450s are haem-thiolate proteins involved in the oxidative degradation of various compounds. They are particularly well known for their role in the degradation of environmental toxins and mutagens. They can be divided into 4 classes, according to the method by which electrons from NAD(P)H are delivered to the catalytic site. Sequence conservation is re…	-	KOG0684, KOG0684, KOG0684, Cytochrome P450 [Secondary metabolites biosynthesis, transport and catabolism]. 2.38e-15	sp|Q9C449|PAXP_PENPX Cytochrome P450 monooxygenase paxP OS=Penicillium paxilli GN=paxP PE=1 SV=1 2.55e-42	-	XP_007527415.1 PREDICTED: 25-hydroxycholesterol 7-alpha-hydroxylase [Erinaceus europaeus] 3.14e-16	-
TRINITY_DN12678_c0_g1	29.3684	101.186	-1.78468	0.0111509	0.0430014	down	-	-	-	-	sp|Q00808|HETE1_PODAS Vegetative incompatibility protein HET-E-1 OS=Podospora anserina GN=HET-E1 PE=3 SV=1 2.70e-83	-	CAF1012293.1 unnamed protein product [Rotaria sp. Silwood1] >CAF1320666.1 unnamed protein product [Rotaria sp. Silwood1] >CAF3520371.1 unnamed protein product [Rotaria sp. Silwood1] >CAF4506557.1 unnamed protein product [Rotaria sp. Silwood1] 3.51e-06	-
TRINITY_DN3198_c0_g1	2.72033	0.306	3.15218	1.57202e-05	0.000141777	up	-	pfam03663, Glyco_hydro_76, Glycosyl hydrolase family 76. Family of alpha-1,6-mannanases. 8.98e-134	-	-	sp|P36091|DCW1_YEAST Mannan endo-1,6-alpha-mannosidase DCW1 OS=Saccharomyces cerevisiae (strain ATCC 204508 / S288c) GN=DCW1 PE=1 SV=1 3.47e-115	-	KAJ3014502.1 hydrolase 76 protein [Siphonaria sp. JEL0065] 1.68e-17	-
TRINITY_DN11466_c0_g2	1.13616	0.0591927	4.2626	0.0064425	0.0274413	up	-	-	-	-	-	GO:0003674, molecular_function;GO:0003824, catalytic activity;GO:0006810, transport;GO:0008150, biological_process;GO:0016192, vesicle-mediated transport;GO:0016298, lipase activity;GO:0016787, hydrolase activity;GO:0016788, hydrolase activity, acting on ester bonds;GO:0051179, localization;GO:0051234, establishment of localization	-	-
TRINITY_DN25679_c0_g1	16.1529	6.6487	1.28065	0.00263974	0.012964	up	-	-	-	-	-	-	-	-
TRINITY_DN8239_c0_g1	10.1721	4.71683	1.10873	0.00346707	0.0163241	up	-	-	-	-	-	-	-	-
TRINITY_DN6926_c0_g1	98.5174	24.8448	1.98744	2.30672e-08	3.33891e-07	up	cd06186, NOX_Duox_like_FAD_NADP, NADPH oxidase (NOX) catalyzes the generation of reactive oxygen species (ROS) such as superoxide and hydrogen peroxide. ROS were originally identified as bactericidal agents in phagocytes, but are now also implicated in cell signaling and metabolism. NOX has a 6-alpha helix heme-binding transmembrane domain fused to a flavoprotein with the nucleotide binding domai…	pfam08030, NAD_binding_6, Ferric reductase NAD binding domain. 7.94e-10	-	-	sp|P36033|FRE2_YEAST Ferric/cupric reductase transmembrane component 2 OS=Saccharomyces cerevisiae (strain ATCC 204508 / S288c) GN=FRE2 PE=1 SV=1 5.24e-37	-	-	-
TRINITY_DN4090_c0_g1	3.83441	1.17233	1.70962	0.000115732	0.000838275	up	-	pfam00172, Zn_clus, Fungal Zn(2)-Cys(6) binuclear cluster domain. 1.72e-06	-	-	-	-	-	-
TRINITY_DN1074_c0_g1	0.268017	4.38029	-4.03063	0.00138088	0.00743341	down	-	pfam11625, DUF3253, Protein of unknown function (DUF3253). This bacterial family of proteins has no known function. 1.96e-11	-	-	-	-	GAV03337.1 hypothetical protein RvY_13777-2 [Ramazzottius varieornatus] 1.62e-07	-
TRINITY_DN11017_c0_g1	1.06937	9.93308	-3.21548	1.68557e-07	2.15865e-06	down	-	-	-	-	sp|A7XRZ1|TDIE_EMENI Probable methyltransferase tdiE OS=Emericella nidulans (strain FGSC A4 / ATCC 38163 / CBS 112.46 / NRRL 194 / M139) GN=tdiE PE=2 SV=1 1.02e-23	-	-	-
TRINITY_DN10136_c0_g1	18.3561	61.1664	-1.73648	1.90683e-05	0.000168029	down	cd17358, MFS_GLUT6_8_Class3_like, Glucose transporter (GLUT) types 6 and 8, Class 3 GLUTs, and similar transporters of the Major Facilitator Superfamily. This subfamily is composed of glucose transporter type 6 (GLUT6), GLUT8, plant early dehydration-induced gene ERD6-like proteins, and similar insect proteins including facilitated trehalose transporter Tret1-1. GLUTs, also called Solute carrier …	pfam00083, Sugar_tr, Sugar (and other) transporter. 5.06e-28	-	KOG0254, KOG0254, KOG0254, Predicted transporter (major facilitator superfamily) [General function prediction only]. 8.18e-38	sp|A6ZX88|MPH3_YEAS7 Alpha-glucosides permease MPH3 OS=Saccharomyces cerevisiae (strain YJM789) GN=MPH3 PE=3 SV=1 8.14e-87	-	CAF1444061.1 unnamed protein product [Adineta ricciae] 1.59e-36	-
TRINITY_DN13787_c0_g3	27.6587	6.37264	2.11777	6.32276e-11	1.29213e-09	up	-	-	-	-	sp|Q00808|HETE1_PODAS Vegetative incompatibility protein HET-E-1 OS=Podospora anserina GN=HET-E1 PE=3 SV=1 8.30e-81	-	-	-
TRINITY_DN13787_c0_g2	3.0686	1.47291	1.05891	0.0109681	0.042418	up	-	pfam06985, HET, Heterokaryon incompatibility protein (HET). This family represents a conserved region approximately 150 residues long within various heterokaryon incompatibility proteins that seem to be restricted to ascomycete fungi. Genetic differences in specific het genes prevent a viable heterokaryotic fungal cell from being formed by the fusion of filaments from two different wild-type stra…	-	-	sp|Q9UV10|HET6_NEUCR Heterokaryon incompatibility protein 6, OR allele OS=Neurospora crassa (strain ATCC 24698 / 74-OR23-1A / CBS 708.71 / DSM 1257 / FGSC 987) GN=het-6 PE=4 SV=1 9.13e-13	-	KAI1691421.1 heterokaryon incompatibility protein (HET) domain-containing protein [Ditylenchus destructor] 6.70e-21	-
TRINITY_DN13787_c0_g1	9.42474	3.92466	1.26389	0.00129067	0.00701803	up	sd00045, ANK, ankyrin repeats. Ankyrin repeats are one of the most abundant repeat motifs, and generally function as scaffolds for protein-protein interactions in processes including cell cycle, transcriptional regulation, signal transduction, vesicular trafficking, and inflammatory response. Although predominantly found in eukaryotic proteins, they are also found in some bacterial and viral prot…	-	-	KOG0195, KOG0195, KOG0195, Integrin-linked kinase [Signal transduction mechanisms]. 4.65e-06	sp|Q5BEJ5|AFOF_EMENI FAD-linked oxidoreductase afoF OS=Emericella nidulans (strain FGSC A4 / ATCC 38163 / CBS 112.46 / NRRL 194 / M139) GN=afoF PE=1 SV=1 4.07e-15	-	XP_021965169.1 berberine bridge enzyme-like 23 [Folsomia candida] >OXA40701.1 Cannabidiolic acid synthase-like 1 [Folsomia candida] 4.01e-32	-
TRINITY_DN11058_c0_g1	33.2125	6.15323	2.43231	0.0102848	0.0402502	up	-	-	-	-	-	-	-	-
TRINITY_DN13362_c0_g1	56.8051	236.242	-2.05617	2.9634e-10	5.57326e-09	down	cd04300, GT35_Glycogen_Phosphorylase, glycogen phosphorylase and similar proteins. This is a family of oligosaccharide phosphorylases. It includes yeast and mammalian glycogen phosphorylases, plant starch/glucan phosphorylase, as well as the maltodextrin phosphorylases of bacteria. The members of this family catalyze the breakdown of oligosaccharides into glucose-1-phosphate units. They are impor…	pfam00343, Phosphorylase, Carbohydrate phosphorylase. The members of this family catalyze the formation of glucose 1-phosphate from one of the following polyglucoses; glycogen, starch, glucan or maltodextrin. 0.0	K00688-ko04922 Glucagon signaling pathway;ko04910 Insulin signaling pathway;ko00500 Starch and sucrose metabolism	KOG2099, KOG2099, KOG2099, Glycogen phosphorylase [Carbohydrate transport and metabolism]. 2.67e-13	sp|P06738|PHSG_YEAST Glycogen phosphorylase OS=Saccharomyces cerevisiae (strain ATCC 204508 / S288c) GN=GPH1 PE=1 SV=4 7.31e-31	GO:0000272, polysaccharide catabolic process;GO:0003674, molecular_function;GO:0003824, catalytic activity;GO:0004645, phosphorylase activity;GO:0005488, binding;GO:0005575, cellular_component;GO:0005622, intracellular;GO:0005623, cell;GO:0005737, cytoplasm;GO:0005975, carbohydrate metabolic process;GO:0005976, polysaccharide metabolic process;GO:0005977, glycogen metabolic process;GO:0005980, gl…	KAJ3020905.1 Non-essential glycogen phosphorylase [Siphonaria sp. JEL0065] 2.08e-261	-
TRINITY_DN10775_c0_g1	4.58677	1.01351	2.17812	0.00537081	0.0236719	up	-	-	-	-	-	-	-	-
TRINITY_DN10420_c0_g1	2.76909	0.898989	1.62304	0.00437375	0.0199301	up	cd17358, MFS_GLUT6_8_Class3_like, Glucose transporter (GLUT) types 6 and 8, Class 3 GLUTs, and similar transporters of the Major Facilitator Superfamily. This subfamily is composed of glucose transporter type 6 (GLUT6), GLUT8, plant early dehydration-induced gene ERD6-like proteins, and similar insect proteins including facilitated trehalose transporter Tret1-1. GLUTs, also called Solute carrier …	pfam00083, Sugar_tr, Sugar (and other) transporter. 3.48e-34	-	KOG0254, KOG0254, KOG0254, Predicted transporter (major facilitator superfamily) [General function prediction only]. 4.32e-28	sp|P49374|HGT1_KLULA High-affinity glucose transporter OS=Kluyveromyces lactis (strain ATCC 8585 / CBS 2359 / DSM 70799 / NBRC 1267 / NRRL Y-1140 / WM37) GN=HGT1 PE=3 SV=1 7.78e-28	-	CAF0851319.1 unnamed protein product [Didymodactylos carnosus] >CAF3636489.1 unnamed protein product [Didymodactylos carnosus] 3.84e-32	-
TRINITY_DN16062_c0_g1	3.08986	36.9927	-3.58163	4.32782e-12	1.00166e-10	down	-	-	-	KOG2495, KOG2495, KOG2495, NADH-dehydrogenase (ubiquinone) [Energy production and conversion]. 9.26e-77	sp|Q55CD9|NDH_DICDI Probable NADH dehydrogenase OS=Dictyostelium discoideum GN=DDB_G0270104 PE=3 SV=2 9.76e-73	-	XP_037037499.1 probable NADH dehydrogenase [Bradysia coprophila] >XP_037037500.1 probable NADH dehydrogenase [Bradysia coprophila] 7.14e-92	-
TRINITY_DN9993_c0_g1	3.02623	0.974942	1.63413	0.0050902	0.0226396	up	-	-	-	-	-	-	-	-
TRINITY_DN10676_c0_g1	2.89378	15.3101	-2.40345	2.00698e-08	2.93346e-07	down	cd03860, M14_CP_A-B_like, Peptidase M14 carboxypeptidase subfamily A/B-like. The Peptidase M14 Carboxypeptidase (CP) A/B subfamily is one of two main M14 CP subfamilies defined by sequence and structural homology, the other being the N/E subfamily. CPs hydrolyze single, C-terminal amino acids from polypeptide chains. They have a recognition site for the free C-terminal carboxyl group, which is a …	pfam00246, Peptidase_M14, Zinc carboxypeptidase. 2.51e-43	-	KOG2650, KOG2650, KOG2650, Zinc carboxypeptidase [Function unknown]. 3.26e-46	sp|C5FH26|MCPAL_ARTOC Metallocarboxypeptidase A-like protein MCYG_01475 OS=Arthroderma otae (strain ATCC MYA-4605 / CBS 113480) GN=MCYG_01475 PE=3 SV=1 6.46e-75	-	XP_037926695.1 zinc carboxypeptidase-like [Hermetia illucens] 1.45e-40	-
TRINITY_DN11442_c0_g1	2.68992	10.2773	-1.93383	2.90797e-05	0.000243332	down	cd17327, MFS_FEN2_like, Pantothenate transporter FEN2 and similar transporters of the Major Facilitator Superfamily. This family is composed of Saccharomyces cerevisiae pantothenate transporter FEN2 (or fenpropimorph resistance protein 2) and similar proteins from fungi and bacteria including fungal vitamin H transporter, allantoate permease, and high-affinity nicotinic acid transporter, as well …	-	-	KOG2533, KOG2533, KOG2533, Permease of the major facilitator superfamily [Carbohydrate transport and metabolism]. 1.11e-12	sp|P39709|SEO1_YEAST Probable transporter SEO1 OS=Saccharomyces cerevisiae (strain ATCC 204508 / S288c) GN=SEO1 PE=1 SV=1 3.50e-27	GO:0003674, molecular_function;GO:0005215, transporter activity;GO:0005342, organic acid transmembrane transporter activity;GO:0005575, cellular_component;GO:0005623, cell;GO:0005886, plasma membrane;GO:0006810, transport;GO:0006811, ion transport;GO:0006820, anion transport;GO:0006855, drug transmembrane transport;GO:0008028, monocarboxylic acid transmembrane transporter activity;GO:0008150, bio…	CAF0767064.1 unnamed protein product [Rotaria sp. Silwood1] >CAF0866447.1 unnamed protein product [Rotaria sp. Silwood1] >CAF3380815.1 unnamed protein product [Rotaria sp. Silwood1] >CAF3387011.1 unnamed protein product [Rotaria sp. Silwood1] >CAF4606177.1 unnamed protein product [Rotaria sp. Silwood1] 1.58e-11	-
TRINITY_DN20876_c0_g1	3.64059	10.9614	-1.59018	0.00113102	0.00627168	down	cd17502, MFS_Azr1_MDR_like, Saccharomyces cerevisiae Azole resistance protein 1 (Azr1p), and similar multidrug resistance (MDR) transporters of the Major Facilitator Superfamily. This subfamily is composed of multidrug resistance (MDR) transporters including various Saccharomyces cerevisiae proteins such as azole resistance protein 1 (Azr1p), vacuolar basic amino acid transporter 1 (Vba1p), vacuo…	-	-	-	sp|B6HJU0|ROQT_PENRW Efflux pump roqT OS=Penicillium rubens (strain ATCC 28089 / DSM 1075 / NRRL 1951 / Wisconsin 54-1255) GN=roqT PE=1 SV=1 4.06e-14	-	KAJ3020485.1 hypothetical protein HDU68_010156 [Siphonaria sp. JEL0065] 1.99e-06	-
TRINITY_DN12090_c0_g1	1.39916	12.2078	-3.12517	1.12695e-06	1.26074e-05	down	-	-	K00480-ko00621 Dioxin degradation;ko00624 Polycyclic aromatic hydrocarbon degradation;ko00626 Naphthalene degradation;ko01220 Degradation of aromatic compounds	-	sp|Q88FY2|6HN3M_PSEPK 6-hydroxynicotinate 3-monooxygenase OS=Pseudomonas putida (strain KT2440) GN=nicC PE=1 SV=1 2.43e-13	-	CAF3266067.1 unnamed protein product [Rotaria sp. Silwood2] >CAF4249819.1 unnamed protein product [Rotaria sp. Silwood2] 4.22e-20	-
TRINITY_DN13598_c0_g1	1.66276	4.85877	-1.54701	0.0018885	0.00975593	down	cd05918, A_NRPS_SidN3_like, The adenylation (A) domain of siderophore-synthesizing nonribosomal peptide synthetases (NRPS). The adenylation (A) domain of NRPS recognizes a specific amino acid or hydroxy acid and activates it as an (amino) acyl adenylate by hydrolysis of ATP. The activated acyl moiety then forms a thioester to the enzyme-bound cofactor phosphopantetheine of a peptidyl carrier prot…	pfam00501, AMP-binding, AMP-binding enzyme. 2.78e-26	-	KOG1177, KOG1177, KOG1177, Long chain fatty acid acyl-CoA ligase [Lipid transport and metabolism]. 1.90e-13	sp|Q4WT66|NRPS1_ASPFU Nonribosomal peptide synthetase 1 OS=Neosartorya fumigata (strain ATCC MYA-4609 / Af293 / CBS 101355 / FGSC A1100) GN=NRPS1 PE=1 SV=1 4.54e-08	GO:0000003, reproduction;GO:0005575, cellular_component;GO:0005618, cell wall;GO:0005623, cell;GO:0008150, biological_process;GO:0008152, metabolic process;GO:0009277, fungal-type cell wall;GO:0009987, cellular process;GO:0010720, positive regulation of cell development;GO:0019748, secondary metabolic process;GO:0019954, asexual reproduction;GO:0030154, cell differentiation;GO:0030312, external e…	XP_031634798.1 uncharacterized protein LOC116348076 [Contarinia nasturtii] 6.28e-162	-
TRINITY_DN8276_c0_g1	0.646593	7.87919	-3.60712	0.000497903	0.00305582	down	-	-	-	-	-	-	-	-
TRINITY_DN8330_c0_g1	5.1577	29.9689	-2.53867	2.34003e-08	3.37622e-07	down	-	-	-	-	-	-	-	-
TRINITY_DN14179_c0_g1	2229.46	1067.94	1.06186	0.00142305	0.00763902	up	-	-	-	-	-	GO:0008150, biological_process;GO:0009987, cellular process;GO:0010033, response to organic substance;GO:0010035, response to inorganic substance;GO:0010037, response to carbon dioxide;GO:0035690, cellular response to drug;GO:0042221, response to chemical;GO:0042493, response to drug;GO:0043051, regulation of pharyngeal pumping;GO:0048519, negative regulation of biological process;GO:0048521, neg…	-	Homo sapiens mRNA full length insert cDNA clone EUROIMAGE 1979161 4.42e-50
TRINITY_DN14024_c1_g1	23.7404	109.063	-2.19974	4.80206e-09	7.65754e-08	down	-	pfam09729, Gti1_Pac2, Gti1/Pac2 family. In S. pombe the gti1 protein promotes the onset of gluconate uptake upon glucose starvation. In S. pombe the Pac2 protein controls the onset of sexual development, by inhibiting the expression of ste11, in a pathway that is independent of the cAMP cascade. 1.96e-35	-	KOG4476, KOG4476, KOG4476, Gluconate transport-inducing protein [Signal transduction mechanisms, Carbohydrate transport and metabolism]. 4.19e-20	sp|G2X740|WOR1_VERDV Global transcription regulator sge1 OS=Verticillium dahliae (strain VdLs.17 / ATCC MYA-4575 / FGSC 10137) GN=sge1 PE=3 SV=1 5.33e-66	GO:0000228, nuclear chromosome;GO:0000746, conjugation;GO:0000785, chromatin;GO:0000790, nuclear chromatin;GO:0003674, molecular_function;GO:0003676, nucleic acid binding;GO:0003677, DNA binding;GO:0003700, DNA binding transcription factor activity;GO:0005488, binding;GO:0005575, cellular_component;GO:0005622, intracellular;GO:0005623, cell;GO:0005634, nucleus;GO:0005694, chromosome;GO:0005737, c…	KAJ3026201.1 hypothetical protein HDU68_006075 [Siphonaria sp. JEL0065] 6.93e-10	-
TRINITY_DN20808_c0_g1	8.02946	3.24957	1.30505	0.00392185	0.0181664	up	-	-	-	-	-	-	-	-
TRINITY_DN6935_c0_g1	170.984	83.7867	1.02907	0.000708386	0.0041871	up	-	-	-	-	-	-	-	-
TRINITY_DN13487_c0_g1	489.156	217.585	1.16871	0.00154091	0.00818352	up	-	-	-	-	-	-	-	-
TRINITY_DN16515_c0_g1	1.51106	5.44036	-1.84814	0.00176803	0.00922214	down	-	pfam13520, AA_permease_2, Amino acid permease. 2.75e-09	-	KOG1289, KOG1289, KOG1289, Amino acid transporters [Amino acid transport and metabolism]. 5.16e-53	sp|P19807|HNM1_YEAST Choline transport protein OS=Saccharomyces cerevisiae (strain ATCC 204508 / S288c) GN=HNM1 PE=1 SV=1 3.28e-56	-	CAF1993959.1 unnamed protein product [Rotaria magnacalcarata] >CAF3927218.1 unnamed protein product [Rotaria magnacalcarata] 4.58e-62	-
TRINITY_DN13497_c1_g2	64.8109	132.732	-1.03421	0.0100143	0.0394442	down	cd05479, RP_DDI, RP_DDI; retropepsin-like domain of DNA damage inducible protein. The family represents the retropepsin-like domain of DNA damage inducible protein. DNA damage inducible protein has a retropepsin-like domain and an amino-terminal ubiquitin-like domain and/or a UBA (ubiquitin-associated) domain. This CD represents the retropepsin-like domain of DDI. 7.56e-47	pfam09668, Asp_protease, Aspartyl protease. This family of eukaryotic aspartyl proteases have a fold similar to retroviral proteases which implies they function proteolytically during regulated protein turnover. 1.31e-41	-	KOG0012, KOG0012, KOG0012, DNA damage inducible protein [Replication, recombination and repair]. 4.87e-43	sp|Q2H085|DDI1_CHAGB DNA damage-inducible protein 1 OS=Chaetomium globosum (strain ATCC 6205 / CBS 148.51 / DSM 1962 / NBRC 6347 / NRRL 1970) GN=DDI1 PE=3 SV=2 7.66e-151	GO:0000154, rRNA modification;GO:0001510, RNA methylation;GO:0003674, molecular_function;GO:0003824, catalytic activity;GO:0005575, cellular_component;GO:0005622, intracellular;GO:0005623, cell;GO:0005634, nucleus;GO:0005730, nucleolus;GO:0006139, nucleobase-containing compound metabolic process;GO:0006364, rRNA processing;GO:0006396, RNA processing;GO:0006725, cellular aromatic compound metaboli…	XP_045624600.1 protein DDI1 homolog 2-like isoform X6 [Procambarus clarkii] 1.39e-62	-
TRINITY_DN13497_c1_g3	53.8607	24.8868	1.11385	0.00068733	0.0040716	up	-	pfam02181, FH2, Formin Homology 2 Domain. 1.06e-35	K11238-ko04011 MAPK signaling pathway - yeast	KOG1924, KOG1924, KOG1924, RhoA GTPase effector DIA/Diaphanous [Signal transduction mechanisms, Cytoskeleton]. 7.00e-15	sp|P78621|SEPA_EMENI Cytokinesis protein sepA OS=Emericella nidulans (strain FGSC A4 / ATCC 38163 / CBS 112.46 / NRRL 194 / M139) GN=sepA PE=3 SV=2 0.0	GO:0000003, reproduction;GO:0000131, incipient cellular bud site;GO:0000132, establishment of mitotic spindle orientation;GO:0000133, polarisome;GO:0000142, cellular bud neck contractile ring;GO:0000226, microtubule cytoskeleton organization;GO:0000278, mitotic cell cycle;GO:0000281, mitotic cytokinesis;GO:0000282, cellular bud site selection;GO:0000399, cellular bud neck septin structure;GO:0000…	XP_047005208.1 protein diaphanous isoform X4 [Schistocerca americana] 1.24e-18	-
TRINITY_DN10944_c0_g1	2.74951	24.3679	-3.14774	4.44498e-16	1.53655e-14	down	-	pfam01699, Na_Ca_ex, Sodium/calcium exchanger protein. This is a family of sodium/calcium exchanger integral membrane proteins. This family covers the integral membrane regions of the proteins. Sodium/calcium exchangers regulate intracellular Ca2+ concentrations in many cells; cardiac myocytes, epithelial cells, neurons retinal rod photoreceptors and smooth muscle cells. Ca2+ is moved into or out…	-	KOG1397, KOG1397, KOG1397, Ca2+/H+ antiporter VCX1 and related proteins [Inorganic ion transport and metabolism]. 9.78e-79	sp|O59768|VCX1_SCHPO Vacuolar calcium ion transporter OS=Schizosaccharomyces pombe (strain 972 / ATCC 24843) GN=vcx1 PE=3 SV=1 2.06e-105	GO:0000322, storage vacuole;GO:0000323, lytic vacuole;GO:0000324, fungal-type vacuole;GO:0000329, fungal-type vacuole membrane;GO:0003674, molecular_function;GO:0005215, transporter activity;GO:0005451, monovalent cation:proton antiporter activity;GO:0005575, cellular_component;GO:0005622, intracellular;GO:0005623, cell;GO:0005737, cytoplasm;GO:0005773, vacuole;GO:0005774, vacuolar membrane;GO:00…	KAJ3025124.1 hypothetical protein HDU68_007436 [Siphonaria sp. JEL0065] 7.47e-84	-
TRINITY_DN10049_c0_g1	63.5869	501.101	-2.9783	2.72384e-14	8.13943e-13	down	-	pfam00324, AA_permease, Amino acid permease. 3.12e-73	-	KOG1286, KOG1286, KOG1286, Amino acid transporters [Amino acid transport and metabolism]. 5.67e-88	sp|Q9P768|YI26_SCHPO Uncharacterized amino-acid permease P7G5.06 OS=Schizosaccharomyces pombe (strain 972 / ATCC 24843) GN=SPAP7G5.06 PE=3 SV=1 1.35e-123	GO:0000139, Golgi membrane;GO:0000322, storage vacuole;GO:0000323, lytic vacuole;GO:0000324, fungal-type vacuole;GO:0003333, amino acid transmembrane transport;GO:0003674, molecular_function;GO:0005215, transporter activity;GO:0005342, organic acid transmembrane transporter activity;GO:0005575, cellular_component;GO:0005622, intracellular;GO:0005623, cell;GO:0005737, cytoplasm;GO:0005773, vacuole…	CAF0984196.1 unnamed protein product [Didymodactylos carnosus] >CAF3756523.1 unnamed protein product [Didymodactylos carnosus] 2.89e-150	-
TRINITY_DN7520_c0_g1	2.45691	0.0718339	5.09603	0.000202888	0.00138841	up	-	-	-	-	-	-	CAF3953243.1 unnamed protein product [Rotaria sp. Silwood1] 2.76e-18	-
TRINITY_DN9482_c0_g1	4.90127	16.6193	-1.76163	0.00252707	0.0124946	down	-	-	-	-	-	-	-	-
TRINITY_DN12367_c0_g1	22.0477	49.2246	-1.15875	0.00122211	0.0067049	down	cd12173, PGDH_4, Phosphoglycerate dehydrogenases, NAD-binding and catalytic domains. Phosphoglycerate dehydrogenases (PGDHs) catalyze the initial step in the biosynthesis of L-serine from D-3-phosphoglycerate. PGDHs come in 3 distinct structural forms, with this first group being related to 2-hydroxy acid dehydrogenases, sharing structural similarity to formate and glycerate dehydrogenases. PGDH …	pfam00389, 2-Hacid_dh, D-isomer specific 2-hydroxyacid dehydrogenase, catalytic domain. This family represents the largest portion of the catalytic domain of 2-hydroxyacid dehydrogenases as the NAD binding domain is inserted within the structural domain. 1.61e-46	K00058-ko01200 Carbon metabolism;ko00680 Methane metabolism;ko01230 Biosynthesis of amino acids;ko00260 Glycine, serine and threonine metabolism	KOG0068, KOG0068, KOG0068, D-3-phosphoglycerate dehydrogenase, D-isomer-specific 2-hydroxy acid dehydrogenase superfamily [Amino acid transport and metabolism]. 1.87e-83	sp|O04130|SERA2_ARATH D-3-phosphoglycerate dehydrogenase 2, chloroplastic OS=Arabidopsis thaliana GN=PGDH2 PE=1 SV=2 1.34e-109	-	AQT27213.1 putative D-3-phosphoglycerate dehydrogenase [Nilaparvata lugens] >MBR2118763.1 phosphoglycerate dehydrogenase [Afipia sp.] 8.62e-96	-
TRINITY_DN13941_c4_g4	26.727	10.7114	1.31915	1.27038e-05	0.000116766	up	-	-	-	-	-	-	-	-
TRINITY_DN13437_c0_g1	3.52663	8.60844	-1.28746	0.00221057	0.0111624	down	-	pfam00743, FMO-like, Flavin-binding monooxygenase-like. This family includes FMO proteins, cyclohexanone mono-oxygenase and a number of different mono-oxygenases. 3.39e-06	-	KOG1399, KOG1399, KOG1399, Flavin-containing monooxygenase [Secondary metabolites biosynthesis, transport and catabolism]. 1.04e-22	sp|Q9HFE4|FMO1_SCHPO Thiol-specific monooxygenase OS=Schizosaccharomyces pombe (strain 972 / ATCC 24843) GN=fmo1 PE=1 SV=1 1.65e-26	-	XP_043256572.1 dimethylaniline monooxygenase [N-oxide-forming] 3-like [Colletes gigas] >XP_043256573.1 dimethylaniline monooxygenase [N-oxide-forming] 3-like [Colletes gigas] >XP_043256574.1 dimethylaniline monooxygenase [N-oxide-forming] 3-like [Colletes gigas] 3.93e-19	-
TRINITY_DN14276_c0_g10	29.6848	5.72457	2.37449	1.33222e-09	2.29084e-08	up	sd00045, ANK, ankyrin repeats. Ankyrin repeats are one of the most abundant repeat motifs, and generally function as scaffolds for protein-protein interactions in processes including cell cycle, transcriptional regulation, signal transduction, vesicular trafficking, and inflammatory response. Although predominantly found in eukaryotic proteins, they are also found in some bacterial and viral prot…	pfam12796, Ank_2, Ankyrin repeats (3 copies). 8.11e-07	-	KOG4177, KOG4177, KOG4177, Ankyrin [Cell wall/membrane/envelope biogenesis]. 4.54e-06	sp|Q01484|ANK2_HUMAN Ankyrin-2 OS=Homo sapiens GN=ANK2 PE=1 SV=4 3.34e-06	-	CAH0549306.1 unnamed protein product [Brassicogethes aeneus] 7.31e-13	-
TRINITY_DN14542_c0_g1	3.50295	0.232263	3.91474	2.89127e-05	0.000242387	up	-	-	-	-	-	-	CAF1285174.1 unnamed protein product [Adineta steineri] >CAF1566553.1 unnamed protein product [Adineta steineri] 3.84e-10	-
TRINITY_DN9562_c0_g1	14.1938	2.43162	2.54527	1.43664e-12	3.5512e-11	up	-	-	-	-	-	-	-	-
TRINITY_DN1859_c0_g1	0.0822783	1.84577	-4.48756	0.00449932	0.0203967	down	-	-	-	-	-	-	-	-
TRINITY_DN13393_c0_g1	4.25085	12.789	-1.58908	0.0011043	0.00613868	down	-	-	-	-	-	-	-	-
TRINITY_DN11514_c0_g1	19.5635	0.221398	6.46538	1.10911e-15	3.71e-14	up	-	-	-	-	sp|B8N8R2|AFVD_ASPFN Methyltransferase afvD OS=Aspergillus flavus (strain ATCC 200026 / FGSC A1120 / NRRL 3357 / JCM 12722 / SRRC 167) GN=afvD PE=2 SV=1 1.84e-08	-	-	-
TRINITY_DN11643_c0_g1	0.757663	63.5777	-6.39082	2.89994e-52	1.18168e-49	down	cd01939, Ketohexokinase, Ketohexokinase (fructokinase, KHK) catalyzes the phosphorylation of fructose to fructose-1-phosphate (F1P), the first step in the metabolism of dietary fructose. KHK can also phosphorylate several other furanose sugars. It is found in higher eukaryotes where it is believed to function as a dimer and requires K(+) and ATP to be active. In humans, hepatic KHK deficiency cau…	pfam02615, Ldh_2, Malate/L-lactate dehydrogenase. This family consists of bacterial and archaeal Malate/L-lactate dehydrogenase. L-lactate dehydrogenase, EC:1.1.1.27, catalyzes the reaction (S)-lactate + NAD(+) <=> pyruvate + NADH. Malate dehydrogenase, EC:1.1.1.37 and EC:1.1.1.82, catalyzes the reactions: (S)-malate + NAD(+) <=> oxaloacetate + NADH, and (S)-malate + NADP(+) <=> oxaloacetate + NA…	-	KOG2947, KOG2947, KOG2947, Carbohydrate kinase [Carbohydrate transport and metabolism]. 5.05e-09	sp|Q58820|COMC_METJA L-sulfolactate dehydrogenase OS=Methanocaldococcus jannaschii (strain ATCC 43067 / DSM 2661 / JAL-1 / JCM 10045 / NBRC 100440) GN=comC PE=1 SV=1 1.77e-65	-	XP_037939974.1 uncharacterized oxidoreductase YjmC-like [Teleopsis dalmanni] 9.36e-54	-
TRINITY_DN13370_c0_g1	57.9478	152.685	-1.39773	0.000124292	0.000893772	down	cd00311, TIM, Triosephosphate isomerase (TIM) is a glycolytic enzyme that catalyzes the interconversion of dihydroxyacetone phosphate and D-glyceraldehyde-3-phosphate. The reaction is very efficient and requires neither cofactors nor metal ions. TIM, usually homodimeric, but in some organisms tetrameric, is ubiqitous and conserved in function across eukaryotes, bacteria and archaea. 3.57e-63	pfam00121, TIM, Triosephosphate isomerase. 9.00e-73	K01803-ko00051 Fructose and mannose metabolism;ko00010 Glycolysis / Gluconeogenesis;ko01200 Carbon metabolism;ko00562 Inositol phosphate metabolism;ko01230 Biosynthesis of amino acids;ko00710 Carbon fixation in photosynthetic organisms	KOG1643, KOG1643, KOG1643, Triosephosphate isomerase [Carbohydrate transport and metabolism]. 2.43e-84	sp|Q7S2Z9|TPIS_NEUCR Triosephosphate isomerase OS=Neurospora crassa (strain ATCC 24698 / 74-OR23-1A / CBS 708.71 / DSM 1257 / FGSC 987) GN=tpi-1 PE=3 SV=1 1.99e-103	GO:0001968, fibronectin binding;GO:0003674, molecular_function;GO:0003824, catalytic activity;GO:0004807, triose-phosphate isomerase activity;GO:0005488, binding;GO:0005515, protein binding;GO:0005575, cellular_component;GO:0005576, extracellular region;GO:0005618, cell wall;GO:0005622, intracellular;GO:0005623, cell;GO:0005737, cytoplasm;GO:0005739, mitochondrion;GO:0005829, cytosol;GO:0005886, …	XP_002426302.1 triosephosphate isomerase, putative [Pediculus humanus corporis] >EEB13564.1 triosephosphate isomerase, putative [Pediculus humanus corporis] 3.31e-79	-
TRINITY_DN13370_c0_g2	5.28123	2.04846	1.36633	0.00563442	0.0246474	up	cd01095, Nitrilotriacetate_monoxgenase, nitrilotriacetate monoxygenase oxidizes nitrilotriacetate utilizing reduced flavin mononucleotide (FMNH2) and oxygen. The FMNH2 is provided by an NADH:flavin mononucleotide (FMN) oxidorductase that uses NADH to reduce FMN to FMNH2. 2.34e-22	pfam12584, TRAPPC10, Trafficking protein particle complex subunit 10, TRAPPC10. This domain forms part of the TRAPP complex for mediating vesicle docking and fusion in the Golgi apparatus. The fungal version is referred to as Trs130, and an alternative vertebrate alias is TMEM1. 1.54e-15	-	KOG1931, KOG1931, KOG1931, Putative transmembrane protein [General function prediction only]. 7.66e-26	sp|E9JFX9|DMOA_HYPSL Dimethyl-sulfide monooxygenase OS=Hyphomicrobium sulfonivorans GN=dmoA PE=1 SV=1 2.48e-06	GO:0005575, cellular_component;GO:0005622, intracellular;GO:0005623, cell;GO:0005634, nucleus;GO:0005737, cytoplasm;GO:0005768, endosome;GO:0005769, early endosome;GO:0005794, Golgi apparatus;GO:0005801, cis-Golgi network;GO:0005802, trans-Golgi network;GO:0006810, transport;GO:0006886, intracellular protein transport;GO:0006888, ER to Golgi vesicle-mediated transport;GO:0006891, intra-Golgi vesi…	KAF5293245.1 hypothetical protein FQR65_LT20130 [Abscondita terminalis] 1.27e-85	-
TRINITY_DN9626_c0_g1	43.5699	11.0635	1.97752	4.6996e-07	5.61738e-06	up	-	pfam01408, GFO_IDH_MocA, Oxidoreductase family, NAD-binding Rossmann fold. This family of enzymes utilize NADP or NAD. This family is called the GFO/IDH/MOCA family in swiss-prot. 4.51e-10	-	KOG2742, KOG2742, KOG2742, Predicted oxidoreductase [General function prediction only]. 8.81e-07	sp|D4GP30|XDH2_HALVD D-xylose 1-dehydrogenase (NADP(+)) 2 OS=Haloferax volcanii (strain ATCC 29605 / DSM 3757 / JCM 8879 / NBRC 14742 / NCIMB 2012 / VKM B-1768 / DS2) GN=HVO_B0029 PE=1 SV=1 3.56e-18	-	CAF1668446.1 unnamed protein product [Rotaria magnacalcarata] >CAF4068625.1 unnamed protein product [Rotaria magnacalcarata] 1.84e-28	-
TRINITY_DN8883_c0_g1	56.5748	124.153	-1.13389	0.00325047	0.0154832	down	-	pfam07955, DUF1687, Protein of unknown function (DUF1687). This is a putative redox protein which is predicted to have a thioredoxin fold containing a single active cysteine. 1.15e-22	-	-	-	-	-	-
TRINITY_DN14021_c0_g1	43.0597	1.9968	4.43057	1.60556e-16	5.7727e-15	up	cd07143, ALDH_AldA_AN0554, Aspergillus nidulans aldehyde dehydrogenase, AldA (AN0554)-like. NAD(P)+-dependent aldehyde dehydrogenase (AldA) of Aspergillus nidulans (locus AN0554), and other similar sequences, are present in this CD. 2.08e-11	pfam00171, Aldedh, Aldehyde dehydrogenase family. This family of dehydrogenases act on aldehyde substrates. Members use NADP as a cofactor. The family includes the following members: The prototypical members are the aldehyde dehydrogenases EC:1.2.1.3. Succinate-semialdehyde dehydrogenase EC:1.2.1.16. Lactaldehyde dehydrogenase EC:1.2.1.22. Benzaldehyde dehydrogenase EC:1.2.1.28. Methylmalonate-se…	K00128-ko00903 Limonene and pinene degradation;ko00330 Arginine and proline metabolism;ko00280 Valine, leucine and isoleucine degradation;ko00310 Lysine degradation;ko00625 Chloroalkane and chloroalkene degradation;ko00561 Glycerolipid metabolism;ko00620 Pyruvate metabolism;ko00410 beta-Alanine metabolism;ko00040 Pentose and glucuronate interconversions;ko00071 Fatty acid degradation;ko00380 Tryp…	KOG2450, KOG2450, KOG2450, Aldehyde dehydrogenase [Energy production and conversion]. 1.49e-11	sp|P40108|ALDH_DAVTA Aldehyde dehydrogenase OS=Davidiella tassiana GN=CLAH10 PE=1 SV=2 1.38e-08	-	XP_002110540.1 hypothetical protein TRIADDRAFT_37388 [Trichoplax adhaerens] >EDV26544.1 hypothetical protein TRIADDRAFT_37388 [Trichoplax adhaerens] 4.23e-123	-
TRINITY_DN12547_c0_g1	38.8116	379.067	-3.28789	3.47569e-12	8.21345e-11	down	cd11288, gelsolin_S5_like, Gelsolin sub-domain 5-like domain found in gelsolin, severin, villin, and related proteins. Gelsolin repeats occur in gelsolin, severin, villin, advillin, villidin, supervillin, flightless, quail, fragmin, and other proteins, usually in several copies. They co-occur with villin headpiece domains, leucine-rich repeats, and several other domains. These gelsolin-related ac…	pfam13254, DUF4045, Domain of unknown function (DUF4045). This presumed domain is functionally uncharacterized. This domain family is found in bacteria and eukaryotes, and is typically between 384 and 430 amino acids in length. 3.20e-13	-	KOG0443, KOG0443, KOG0443, Actin regulatory proteins (gelsolin/villin family) [Cytoskeleton]. 2.77e-14	sp|P14885|GELS_XENLA Gelsolin (Fragment) OS=Xenopus laevis GN=gsn PE=2 SV=1 1.45e-14	-	RDD41012.1 Advillin [Trichoplax sp. H2] 6.70e-18	-
TRINITY_DN10669_c0_g1	4.31307	12.5884	-1.54531	0.00444932	0.020206	down	cd17356, MFS_HXT, Fungal Hexose transporter subfamily of the Major Facilitator Superfamily of transporters and similar proteins. The fungal hexose transporter (HXT) subfamily is comprised of functionally redundant proteins that function mainly in the transport of glucose, as well as other sugars such as galactose and fructose. Saccharomyces cerevisiae has 20 genes that encode proteins in this fam…	pfam00083, Sugar_tr, Sugar (and other) transporter. 2.16e-35	-	KOG0254, KOG0254, KOG0254, Predicted transporter (major facilitator superfamily) [General function prediction only]. 1.51e-35	sp|P13181|GAL2_YEAST Galactose transporter OS=Saccharomyces cerevisiae (strain ATCC 204508 / S288c) GN=GAL2 PE=1 SV=3 6.95e-36	-	CAF0851319.1 unnamed protein product [Didymodactylos carnosus] >CAF3636489.1 unnamed protein product [Didymodactylos carnosus] 7.56e-50	-
TRINITY_DN13932_c5_g1	2.81557	11.7526	-2.06149	9.35307e-07	1.06766e-05	down	-	pfam15979, Glyco_hydro_115, Glycosyl hydrolase family 115. Glyco_hydro_115 is a family of glycoside hydrolases likely to have the activity of xylan a-1,2-glucuronidase, EC:3.2.1.131, or a-(4-O-methyl)-glucuronidase EC:3.2.1.-. 7.00e-123	-	KOG1336, KOG1336, KOG1336, Monodehydroascorbate/ferredoxin reductase [General function prediction only]. 4.14e-09	sp|Q54NS8|AIFB_DICDI Apoptosis-inducing factor homolog B OS=Dictyostelium discoideum GN=aifB PE=3 SV=1 7.48e-16	-	CAF1481252.1 unnamed protein product [Didymodactylos carnosus] >CAF4271797.1 unnamed protein product [Didymodactylos carnosus] 1.48e-65	-
TRINITY_DN10369_c0_g1	232.357	59.8045	1.95802	4.50815e-12	1.0416e-10	up	-	-	-	-	-	-	-	-
TRINITY_DN13819_c0_g1	54.3342	186.064	-1.77587	0.000318702	0.00207836	down	-	pfam01425, Amidase, Amidase. 1.11e-07	-	KOG3923, KOG3923, KOG3923, D-aspartate oxidase [Amino acid transport and metabolism]. 1.71e-33	sp|Q9Y7N4|OXDA_SCHPO D-amino-acid oxidase OS=Schizosaccharomyces pombe (strain 972 / ATCC 24843) GN=dao1 PE=3 SV=1 5.28e-64	-	CAB4010832.1 Hypothetical predicted protein, partial [Paramuricea clavata] 5.23e-67	-
TRINITY_DN14236_c0_g3	128.432	487.367	-1.92401	1.23711e-06	1.37369e-05	down	cd05312, NAD_bind_1_malic_enz, NAD(P) binding domain of malic enzyme (ME), subgroup 1. Malic enzyme (ME), a member of the amino acid dehydrogenase (DH)-like domain family, catalyzes the oxidative decarboxylation of L-malate to pyruvate in the presence of cations (typically Mg++ or Mn++) with the concomitant reduction of cofactor NAD+ or NADP+. ME has been found in all organisms, and plays importa…	pfam03949, Malic_M, Malic enzyme, NAD binding domain. 2.89e-64	K00029-ko00710 Carbon fixation in photosynthetic organisms;ko01200 Carbon metabolism;ko00620 Pyruvate metabolism	KOG1257, KOG1257, KOG1257, NADP+-dependent malic enzyme [Energy production and conversion]. 2.25e-149	sp|Q6TU48|MAOX_DICDI NADP-dependent malic enzyme OS=Dictyostelium discoideum GN=malA PE=2 SV=1 3.19e-141	-	KAJ3030227.1 hypothetical protein HDU68_009751 [Siphonaria sp. JEL0065] 4.79e-157	-
TRINITY_DN7342_c0_g1	2.39475	0.579333	2.04741	0.00219299	0.0110945	up	-	-	-	-	-	-	-	-
TRINITY_DN13534_c0_g1	15.9144	6.33423	1.32909	2.25359e-05	0.000194756	up	cd16688, RING-H2_Vps11, RING finger, H2 subclass, found in vacuolar protein sorting-associated protein 11 homolog (Vps11) and similar proteins. Vps11, also known as RING finger protein 108 (RNF108), is a soluble protein involved in regulation of glycolipid degradation and retrograde toxin transport. It is highly expressed in heart and pancreas. Vps11 associates with Vps16, Vps18, and Vps33 to for…	pfam12451, VPS11_C, Vacuolar protein sorting protein 11 C terminal. This domain family is found in eukaryotes, and is approximately 50 amino acids in length. Vps 11 is one of the evolutionarily conserved class C vacuolar protein sorting genes (c-vps: vps11, vps16, vps18, and vps33), whose products physically associate to form the c-vps protein complex required for vesicle docking and fusion. 1.29…	-	KOG2114, KOG2114, KOG2114, Vacuolar assembly/sorting protein PEP5/VPS11 [Intracellular trafficking, secretion, and vesicular transport]. 2.48e-145	sp|Q91W86|VPS11_MOUSE Vacuolar protein sorting-associated protein 11 homolog OS=Mus musculus GN=Vps11 PE=1 SV=3 1.35e-47	GO:0000322, storage vacuole;GO:0000323, lytic vacuole;GO:0000324, fungal-type vacuole;GO:0000329, fungal-type vacuole membrane;GO:0003674, molecular_function;GO:0003824, catalytic activity;GO:0004842, ubiquitin-protein transferase activity;GO:0005488, binding;GO:0005515, protein binding;GO:0005575, cellular_component;GO:0005622, intracellular;GO:0005623, cell;GO:0005737, cytoplasm;GO:0005768, end…	XP_039301162.1 LOW QUALITY PROTEIN: uncharacterized protein LOC111061121 [Nilaparvata lugens] 0.0	-
TRINITY_DN13893_c0_g1	0.651986	6.40078	-3.29533	1.13649e-10	2.23427e-09	down	cd02872, GH18_chitolectin_chitotriosidase, This conserved domain family includes a large number of catalytically inactive chitinase-like lectins (chitolectins) including YKL-39, YKL-40 (HCGP39), YM1, oviductin, and AMCase (acidic mammalian chitinase), as well as catalytically active chitotriosidases. The conserved domain is an eight-stranded alpha/beta barrel fold belonging to the family 18 glyco…	pfam00704, Glyco_hydro_18, Glycosyl hydrolases family 18. 1.28e-35	K01183-ko00520 Amino sugar and nucleotide sugar metabolism	KOG2806, KOG2806, KOG2806, Chitinase [Carbohydrate transport and metabolism]. 6.57e-15	sp|P09805|KTXA_KLULA Killer toxin subunits alpha/beta OS=Kluyveromyces lactis (strain ATCC 8585 / CBS 2359 / DSM 70799 / NBRC 1267 / NRRL Y-1140 / WM37) PE=1 SV=1 2.95e-37	-	CAF2685818.1 unnamed protein product [Rotaria sp. Silwood2] >CAF3094001.1 unnamed protein product [Rotaria sp. Silwood2] >CAF4051720.1 unnamed protein product [Rotaria sp. Silwood2] >CAF4166201.1 unnamed protein product [Rotaria sp. Silwood2] 4.12e-97	-
TRINITY_DN13958_c1_g3	121.176	29.3584	2.04526	2.27514e-09	3.79576e-08	up	cd02136, PnbA_NfnB-like, nitroreductase similar to Mycobacterium smegmatis NfnB. Members of this family utilize FMN as a cofactor and catalyze reduction of a variety of nitroaromatic compounds, including nitrofurans, nitrobenzens, nitrophenol, nitrobenzoate and quinones by using either NADH or NADPH as a source of reducing equivalents in an obligatory two-election transfer mechanism. The enzyme i…	pfam00881, Nitroreductase, Nitroreductase family. The nitroreductase family comprises a group of FMN- or FAD-dependent and NAD(P)H-dependent enzymes able to metabolize nitrosubstituted compounds. 2.38e-06	-	-	sp|A0R6D0|NFNB_MYCS2 Nitroreductase NfnB OS=Mycobacterium smegmatis (strain ATCC 700084 / mc(2)155) GN=nfnB PE=1 SV=1 7.79e-11	-	ELU11269.1 hypothetical protein CAPTEDRAFT_128769 [Capitella teleta] 7.26e-16	-
TRINITY_DN13958_c1_g1	353.608	48.7377	2.85904	8.95347e-12	2.00328e-10	up	cd02086, P-type_ATPase_Na_ENA, fungal-type Na(+)-ATPase, similar to the plasma membrane sodium transporters Saccharomyces cerevisiae Ena1p, Ena2p and Ustilago maydis Ena1, and the endoplasmic reticulum sodium transporter Ustilago maydis Ena2. Fungal-type Na(+)-ATPase (also called ENA ATPases). This subfamily includes the Saccharomyces cerevisiae plasma membrane transporters: Na(+)/Li(+)-exporting…	pfam09351, DUF1993, Domain of unknown function (DUF1993). This family of proteins are functionally uncharacterized. 9.63e-34	-	KOG0202, KOG0202, KOG0202, Ca2+ transporting ATPase [Inorganic ion transport and metabolism]. 1.24e-146	sp|P22189|ATC3_SCHPO Calcium-transporting ATPase 3 OS=Schizosaccharomyces pombe (strain 972 / ATCC 24843) GN=cta3 PE=1 SV=1 0.0	-	XP_049849929.1 uncharacterized protein LOC126320473 isoform X2 [Schistocerca gregaria] >XP_049849930.1 uncharacterized protein LOC126320473 isoform X2 [Schistocerca gregaria] 9.48e-180	PREDICTED: Pectinophora gossypiella sodium/potassium-transporting ATPase subunit alpha (LOC126374825), transcript variant X7, mRNA 7.66e-16
TRINITY_DN13958_c1_g4	2.55851	6.38709	-1.31985	0.00283121	0.0137441	down	-	-	-	-	sp|P40467|ASG1_YEAST Activator of stress genes 1 OS=Saccharomyces cerevisiae (strain ATCC 204508 / S288c) GN=ASG1 PE=1 SV=1 7.84e-10	-	-	-
TRINITY_DN2295_c0_g1	7.38527	41.016	-2.47346	1.35917e-07	1.76929e-06	down	-	-	-	-	-	-	-	-
TRINITY_DN10245_c0_g1	9.02607	27.4108	-1.60257	1.93361e-05	0.000169721	down	cd17327, MFS_FEN2_like, Pantothenate transporter FEN2 and similar transporters of the Major Facilitator Superfamily. This family is composed of Saccharomyces cerevisiae pantothenate transporter FEN2 (or fenpropimorph resistance protein 2) and similar proteins from fungi and bacteria including fungal vitamin H transporter, allantoate permease, and high-affinity nicotinic acid transporter, as well …	pfam00962, A_deaminase, Adenosine/AMP deaminase. 1.62e-11	-	KOG2533, KOG2533, KOG2533, Permease of the major facilitator superfamily [Carbohydrate transport and metabolism]. 1.39e-54	sp|Q9P6J8|YHD2_SCHPO Uncharacterized deaminase C1683.02 OS=Schizosaccharomyces pombe (strain 972 / ATCC 24843) GN=SPBC1683.02 PE=3 SV=1 5.47e-75	-	KAG4081120.1 hypothetical protein HA402_010291 [Bradysia odoriphaga] 2.28e-52	-
TRINITY_DN5289_c0_g1	0.154735	1.35006	-3.12515	0.0113907	0.0436882	down	cd07144, ALDH_ALD2-YMR170C, Saccharomyces cerevisiae aldehyde dehydrogenase 2 (YMR170c)-like. NAD(P)+-dependent Saccharomyces cerevisiae aldehyde dehydrogenase 2 (YMR170c, ALD5, EC=1.2.1.5) and other similar sequences, are present in this CD. 0.0	pfam00171, Aldedh, Aldehyde dehydrogenase family. This family of dehydrogenases act on aldehyde substrates. Members use NADP as a cofactor. The family includes the following members: The prototypical members are the aldehyde dehydrogenases EC:1.2.1.3. Succinate-semialdehyde dehydrogenase EC:1.2.1.16. Lactaldehyde dehydrogenase EC:1.2.1.22. Benzaldehyde dehydrogenase EC:1.2.1.28. Methylmalonate-se…	K00129-ko00410 beta-Alanine metabolism;ko00350 Tyrosine metabolism;ko00980 Metabolism of xenobiotics by cytochrome P450;ko00982 Drug metabolism - cytochrome P450;ko00010 Glycolysis / Gluconeogenesis;ko00360 Phenylalanine metabolism;ko00340 Histidine metabolism	KOG2450, KOG2450, KOG2450, Aldehyde dehydrogenase [Energy production and conversion]. 1.06e-170	sp|Q9URW9|YLX7_SCHPO Putative aldehyde dehydrogenase-like protein C922.07c OS=Schizosaccharomyces pombe (strain 972 / ATCC 24843) GN=SPAC922.07c PE=3 SV=1 1.12e-163	GO:0001505, regulation of neurotransmitter levels;GO:0003674, molecular_function;GO:0003824, catalytic activity;GO:0004028, 3-chloroallyl aldehyde dehydrogenase activity;GO:0004029, aldehyde dehydrogenase (NAD) activity;GO:0005575, cellular_component;GO:0005622, intracellular;GO:0005623, cell;GO:0005737, cytoplasm;GO:0006081, cellular aldehyde metabolic process;GO:0006082, organic acid metabolic …	MCL4108844.1 hypothetical protein [Idotea baltica] 3.92e-157	-
TRINITY_DN10126_c0_g1	7.18227	131.7	-4.19667	1.7871e-26	1.43899e-24	down	cd17327, MFS_FEN2_like, Pantothenate transporter FEN2 and similar transporters of the Major Facilitator Superfamily. This family is composed of Saccharomyces cerevisiae pantothenate transporter FEN2 (or fenpropimorph resistance protein 2) and similar proteins from fungi and bacteria including fungal vitamin H transporter, allantoate permease, and high-affinity nicotinic acid transporter, as well …	-	-	KOG2533, KOG2533, KOG2533, Permease of the major facilitator superfamily [Carbohydrate transport and metabolism]. 1.90e-40	sp|Q9P6J0|YHDC_SCHPO Uncharacterized transporter C1683.12 OS=Schizosaccharomyces pombe (strain 972 / ATCC 24843) GN=SPBC1683.12 PE=3 SV=1 4.27e-59	-	CAF3294729.1 unnamed protein product [Rotaria socialis] >CAF3430431.1 unnamed protein product [Rotaria socialis] >CAF4159605.1 unnamed protein product [Rotaria socialis] >CAF4406616.1 unnamed protein product [Rotaria socialis] 1.49e-73	-
TRINITY_DN6763_c0_g2	0.0001	1.17137	-13.5159	0.00245548	0.0122066	down	-	-	-	KOG1303, KOG1303, KOG1303, Amino acid transporters [Amino acid transport and metabolism]. 2.89e-10	sp|P38680|MTR_NEUCR N amino acid transport system protein OS=Neurospora crassa (strain ATCC 24698 / 74-OR23-1A / CBS 708.71 / DSM 1257 / FGSC 987) GN=mtr PE=3 SV=2 4.61e-27	-	-	-
TRINITY_DN14006_c0_g3	37.1372	126.31	-1.76603	3.63789e-05	0.000296837	down	cd19143, AKR_AKR6C1_2, AKR6C family of aldo-keto reductase (AKR). Voltage-gated potassium channel subunit beta (KCAB) from Arabidopsis thaliana and Egeria densa are founding members of aldo-keto reductase family 6 member C1 (AKR6C1) and C2 (AKR6C2), respectively. KCAB, also called Shaker channel b-subunit, or K(+) channel subunit beta, or potassium voltage beta 1, or KV-beta1, or KAB1, is a proba…	pfam00248, Aldo_ket_red, Aldo/keto reductase family. This family includes a number of K+ ion channel beta chain regulatory domains - these are reported to have oxidoreductase activity. 2.14e-29	-	KOG1575, KOG1575, KOG1575, Voltage-gated shaker-like K+ channel, subunit beta/KCNAB [Energy production and conversion]. 4.54e-67	sp|O59826|KCAB_SCHPO Putative voltage-gated potassium channel subunit beta OS=Schizosaccharomyces pombe (strain 972 / ATCC 24843) GN=SPCC965.06 PE=3 SV=1 4.74e-136	GO:0006810, transport;GO:0006811, ion transport;GO:0006812, cation transport;GO:0006813, potassium ion transport;GO:0008150, biological_process;GO:0009987, cellular process;GO:0015672, monovalent inorganic cation transport;GO:0030001, metal ion transport;GO:0034220, ion transmembrane transport;GO:0051179, localization;GO:0051234, establishment of localization;GO:0055085, transmembrane transport;G…	KAJ3023125.1 hypothetical protein HDU68_008767 [Siphonaria sp. JEL0065] 1.94e-121	-
TRINITY_DN9430_c0_g1	3.28202	39.9849	-3.6068	1.05522e-07	1.39524e-06	down	-	-	-	-	-	-	-	-
TRINITY_DN7079_c0_g1	15.3922	6.27876	1.29365	0.00137002	0.00738975	up	-	pfam04118, Dopey_N, Dopey, N-terminal. DopA is the founding member of the Dopey family and is required for correct cell morphology and spatiotemporal organisation of multicellular structures in the filamentous fungus Aspergillus nidulans. DopA homologs are found in mammals. S. cerevisiae DOP1 is essential for viability and, affects cellular morphogenesis. 7.67e-100	-	KOG3613, KOG3613, KOG3613, Dopey and related predicted leucine zipper transcription factors [Transcription]. 1.16e-08	sp|Q9Y7B3|DOP1_EMENI Protein dopey OS=Emericella nidulans (strain FGSC A4 / ATCC 38163 / CBS 112.46 / NRRL 194 / M139) GN=dop1 PE=1 SV=1 1.78e-87	GO:0000003, reproduction;GO:0000139, Golgi membrane;GO:0000902, cell morphogenesis;GO:0000909, sporocarp development involved in sexual reproduction;GO:0003006, developmental process involved in reproduction;GO:0005575, cellular_component;GO:0005622, intracellular;GO:0005623, cell;GO:0005737, cytoplasm;GO:0005739, mitochondrion;GO:0005768, endosome;GO:0005794, Golgi apparatus;GO:0005802, trans-Go…	KAJ3026488.1 hypothetical protein HDU68_005566 [Siphonaria sp. JEL0065] 1.54e-64	-
TRINITY_DN8638_c0_g1	0.0001	145.094	-20.4686	5.30158e-14	1.53643e-12	down	-	-	-	-	-	-	-	-
TRINITY_DN9190_c0_g1	2.38824	19.1999	-3.00708	1.0347e-05	9.6612e-05	down	-	-	-	-	-	-	-	-
TRINITY_DN23855_c0_g1	20.2968	46.0008	-1.18041	0.00359413	0.0168363	down	cd18617, GH43_XynB-like, Glycosyl hydrolase family 43, such as Bacteroides ovatus alpha-L-arabinofuranosidase (BoGH43, XynB). This glycosyl hydrolase family 43 (GH43) subgroup includes enzymes that have been characterized to have alpha-L-arabinofuranosidase (EC 3.2.1.55) and beta-1,4-xylosidase (beta-D-xylosidase;xylan 1,4-beta-xylosidase; EC 3.2.1.37) activities. Beta-1,4-xylosidases are part of…	pfam04616, Glyco_hydro_43, Glycosyl hydrolases family 43. The glycosyl hydrolase family 43 contains members that are arabinanases. Arabinanases hydrolyze the alpha-1,5-linked L-arabinofuranoside backbone of plant cell wall arabinans. The structure of arabinanase Arb43A from Cellvibrio japonicus reveals a five-bladed beta-propeller fold. A long V-shaped groove, partially enclosed at one end, forms…	K14617-ko04977 Vitamin digestion and absorption	-	sp|A4RE85|LMBD1_MAGO7 Probable lysosomal cobalamin transporter OS=Magnaporthe oryzae (strain 70-15 / ATCC MYA-4617 / FGSC 8958) GN=MGG_00740 PE=3 SV=1 5.78e-173	-	XP_033123682.1 probable lysosomal cobalamin transporter [Anneissia japonica] 5.81e-60	-
TRINITY_DN12584_c0_g1	1.47438	5.22363	-1.82494	0.00192253	0.00988614	down	cd05235, SDR_e1, extended (e) SDRs, subgroup 1. This family consists of an SDR module of multidomain proteins identified as putative polyketide sythases fatty acid synthases (FAS), and nonribosomal peptide synthases, among others. However, unlike the usual ketoreductase modules of FAS and polyketide synthase, these domains are related to the extended SDRs, and have canonical NAD(P)-binding motifs…	pfam07993, NAD_binding_4, Male sterility protein. This family represents the C-terminal region of the male sterility protein in a number of arabidopsis and drosophila. A sequence-related jojoba acyl CoA reductase is also included. 1.02e-10	-	KOG1221, KOG1221, KOG1221, Acyl-CoA reductase [Lipid transport and metabolism]. 1.93e-08	sp|A0A0K0MCJ4|CAZM_CHAGB Iterative polyketide synthase CazM OS=Chaetomium globosum (strain ATCC 6205 / CBS 148.51 / DSM 1962 / NBRC 6347 / NRRL 1970) GN=cazM PE=1 SV=1 3.99e-25	-	CAF1227365.1 unnamed protein product [Adineta steineri] >CAF1517826.1 unnamed protein product [Adineta steineri] 6.21e-53	-
TRINITY_DN13936_c1_g1	9.17502	75.6705	-3.04395	2.38571e-18	1.00566e-16	down	cd09019, galactose_mutarotase_like, galactose mutarotase_like. Galactose mutarotase catalyzes the conversion of beta-D-galactose to alpha-D-galactose. Beta-D-galactose is produced by the degradation of lactose, a disaccharide composed of beta-D-glucose and beta-D-galactose. This epimerization reaction is the first step in the four-step Leloir pathway, which converts galactose into metabolically i…	pfam01263, Aldose_epim, Aldose 1-epimerase. 5.13e-24	K01785-ko00052 Galactose metabolism;ko00010 Glycolysis / Gluconeogenesis	KOG1604, KOG1604, KOG1604, Predicted mutarotase [Carbohydrate transport and metabolism]. 1.39e-36	sp|D4AMB9|GALM_ARTBC Probable aldose 1-epimerase ARB_05372 OS=Arthroderma benhamiae (strain ATCC MYA-4681 / CBS 112371) GN=ARB_05372 PE=1 SV=1 3.44e-82	-	RWS25660.1 aldose 1-epimerase-like protein [Leptotrombidium deliense] 6.38e-44	-
TRINITY_DN9711_c0_g1	40.8405	88.1711	-1.1103	0.00385787	0.0179132	down	-	pfam02582, DUF155, Uncharacterized ACR, YagE family COG1723. 1.34e-29	-	KOG2861, KOG2861, KOG2861, Uncharacterized conserved protein [Function unknown]. 1.47e-40	sp|Q09877|SIF3_SCHPO Sad1-interacting factor 3 OS=Schizosaccharomyces pombe (strain 972 / ATCC 24843) GN=sif3 PE=1 SV=2 5.80e-80	GO:0005575, cellular_component;GO:0005622, intracellular;GO:0005623, cell;GO:0005737, cytoplasm;GO:0005739, mitochondrion;GO:0005783, endoplasmic reticulum;GO:0008150, biological_process;GO:0008152, metabolic process;GO:0010467, gene expression;GO:0012505, endomembrane system;GO:0043170, macromolecule metabolic process;GO:0043226, organelle;GO:0043227, membrane-bounded organelle;GO:0043229, intra…	KMQ81886.1 sporulation protein rmd8, partial [Lasius niger] 2.02e-60	-
TRINITY_DN13761_c0_g1	148.167	25.0047	2.56695	2.62415e-16	9.28604e-15	up	cd15587, PHD_Yng1p_like, PHD finger found in yeast orthologs of ING tumor suppressor family. The yeast orthologs of the plant homeodomain (PHD) finger-containing ING tumor suppressor family consists of chromatin modification-related protein YNG1 (Yng1p), YNG2 (Yng2p), and transcriptional regulatory protein PHO23 (Pho23p). Yng1p, also termed ING1 homolog 1, is one of the components of the NuA3 his…	-	-	KOG1973, KOG1973, KOG1973, Chromatin remodeling protein, contains PHD Zn-finger [Chromatin structure and dynamics]. 2.65e-12	sp|Q06479|YL352_YEAST F-box protein YLR352W OS=Saccharomyces cerevisiae (strain ATCC 204508 / S288c) GN=YLR352W PE=1 SV=1 9.45e-22	GO:0000151, ubiquitin ligase complex;GO:0005575, cellular_component;GO:0005622, intracellular;GO:0005623, cell;GO:0019005, SCF ubiquitin ligase complex;GO:0031461, cullin-RING ubiquitin ligase complex;GO:0032991, protein-containing complex;GO:0044424, intracellular part;GO:0044464, cell part;GO:1902494, catalytic complex;GO:1990234, transferase complex	KAF6030706.1 ING3 [Bugula neritina] 2.16e-15	-
TRINITY_DN13063_c1_g1	5.22863	12.8593	-1.29831	0.00427587	0.019557	down	-	pfam05199, GMC_oxred_C, GMC oxidoreductase. This domain found associated with pfam00732. 2.13e-13	-	KOG1238, KOG1238, KOG1238, Glucose dehydrogenase/choline dehydrogenase/mandelonitrile lyase (GMC oxidoreductase family) [General function prediction only]. 2.14e-48	sp|Q13NG7|BETA_BURXL Oxygen-dependent choline dehydrogenase OS=Burkholderia xenovorans (strain LB400) GN=betA PE=3 SV=1 1.79e-54	-	CAF3744399.1 unnamed protein product [Rotaria sp. Silwood1] >CAF4602080.1 unnamed protein product [Rotaria sp. Silwood1] 1.24e-112	-
TRINITY_DN12877_c0_g1	88.2134	1497.19	-4.08512	1.30623e-12	3.25879e-11	down	-	pfam01494, FAD_binding_3, FAD binding domain. This domain is involved in FAD binding in a number of enzymes. 8.97e-40	-	-	sp|O07561|YHJG_BACSU Uncharacterized aromatic compound monooxygenase YhjG OS=Bacillus subtilis (strain 168) GN=yhjG PE=3 SV=1 4.06e-59	-	CAF1040065.1 unnamed protein product [Adineta steineri] >CAF1103335.1 unnamed protein product [Adineta steineri] 1.80e-53	-
TRINITY_DN12810_c0_g1	28.1298	102.309	-1.86276	1.0028e-05	9.39694e-05	down	-	-	-	-	-	-	-	-
TRINITY_DN13698_c3_g6	24.6191	62.9388	-1.35417	0.000311228	0.00203554	down	-	-	-	KOG0048, KOG0048, KOG0048, Transcription factor, Myb superfamily [Transcription]. 6.81e-13	sp|O13493|MYB1_NEUCR Myb-like DNA-binding protein myb-1 OS=Neurospora crassa (strain ATCC 24698 / 74-OR23-1A / CBS 708.71 / DSM 1257 / FGSC 987) GN=rca-1 PE=3 SV=2 2.81e-31	GO:0000278, mitotic cell cycle;GO:0000981, RNA polymerase II transcription factor activity, sequence-specific DNA binding;GO:0000988, transcription factor activity, protein binding;GO:0000989, transcription factor activity, transcription factor binding;GO:0001067, regulatory region nucleic acid binding;GO:0001076, transcription factor activity, RNA polymerase II transcription factor binding;GO:00…	XP_009046770.1 hypothetical protein LOTGIDRAFT_88057, partial [Lottia gigantea] >ESP02554.1 hypothetical protein LOTGIDRAFT_88057, partial [Lottia gigantea] 1.75e-18	-
TRINITY_DN4001_c0_g1	5.39481	17.186	-1.67159	0.000154403	0.00108364	down	cd08190, HOT, Hydroxyacid-oxoacid transhydrogenase (HOT) involved in gamma-hydroxybutyrate metabolism. This family contains hydroxyacid-oxoacid transhydrogenase (HOT), also known as D-2-hydroxyglutarate transhydrogenase. It catalyzes the conversion of gamma-hydroxybutyrate (GHB) to succinic semialdehyde (SSA), coupled to the stoichiometric conversion of alpha-ketoglutarate to D-2-hydroxyglutarate…	pfam00465, Fe-ADH, Iron-containing alcohol dehydrogenase. 2.52e-42	-	KOG3857, KOG3857, KOG3857, Alcohol dehydrogenase, class IV [Energy production and conversion]. 3.24e-126	sp|A6QP15|HOT_BOVIN Hydroxyacid-oxoacid transhydrogenase, mitochondrial OS=Bos taurus GN=ADHFE1 PE=2 SV=1 1.71e-166	-	KAG8176357.1 hypothetical protein JTE90_006147 [Oedothorax gibbosus] 1.09e-179	PREDICTED: Drosophila biarmipes probable hydroxyacid-oxoacid transhydrogenase, mitochondrial (LOC108026635), mRNA 3.54e-12
TRINITY_DN11700_c0_g1	14.8903	4.57791	1.70161	2.62409e-06	2.75458e-05	up	-	-	-	-	-	-	-	-
TRINITY_DN3612_c0_g1	27.1544	87.5717	-1.68928	0.000413191	0.00260243	down	-	-	K13345-ko04146 Peroxisome	KOG0826, KOG0826, KOG0826, Predicted E3 ubiquitin ligase involved in peroxisome organization [Posttranslational modification, protein turnover, chaperones]. 2.76e-31	sp|C8VCP8|PEX12_EMENI Peroxisome assembly protein 12 OS=Emericella nidulans (strain FGSC A4 / ATCC 38163 / CBS 112.46 / NRRL 194 / M139) GN=PEX12 PE=3 SV=1 1.07e-154	GO:0003674, molecular_function;GO:0003824, catalytic activity;GO:0004842, ubiquitin-protein transferase activity;GO:0005488, binding;GO:0005515, protein binding;GO:0005575, cellular_component;GO:0005622, intracellular;GO:0005623, cell;GO:0005737, cytoplasm;GO:0005777, peroxisome;GO:0005778, peroxisomal membrane;GO:0005779, integral component of peroxisomal membrane;GO:0006464, cellular protein mo…	XP_041855043.1 peroxisome assembly protein 12 [Melanotaenia boesemani] >XP_041855053.1 peroxisome assembly protein 12 [Melanotaenia boesemani] 6.67e-32	-
TRINITY_DN14204_c2_g3	0.640461	18.8513	-4.87941	9.48848e-15	2.96036e-13	down	cd13934, RNase_H_Dikarya_like, Fungal (dikarya) Ribonuclease H, uncharacterized. This family contains dikarya RNase H, many of which are uncharacterized. Ribonuclease H (RNase H) enzymes are divided into two major families, Type 1 and Type 2, based on amino acid sequence similarities and biochemical properties. RNase H is an endonuclease that cleaves the RNA strand of an RNA/DNA hybrid in a seque…	pfam00075, RNase_H, RNase H. RNase H digests the RNA strand of an RNA/DNA hybrid. Important enzyme in retroviral replication cycle, and often found as a domain associated with reverse transcriptases. Structure is a mixed alpha+beta fold with three a/b/a layers. 5.31e-08	K03469-ko03030 DNA replication	KOG3752, KOG3752, KOG3752, Ribonuclease H [Replication, recombination and repair]. 1.94e-07	sp|A7GAG3|RNH_CLOBL Ribonuclease H OS=Clostridium botulinum (strain Langeland / NCTC 10281 / Type F) GN=rnhA PE=3 SV=1 6.48e-12	-	MCL4112785.1 hypothetical protein [Idotea baltica] 1.47e-11	-
TRINITY_DN13944_c0_g3	0.320901	19.9	-5.9545	3.18972e-06	3.3147e-05	down	-	-	-	-	-	-	-	-
TRINITY_DN13944_c0_g1	22.5329	147.64	-2.71198	1.48552e-09	2.53822e-08	down	-	-	-	-	-	-	-	-
TRINITY_DN12532_c0_g1	64.4642	19.9334	1.69331	3.98542e-05	0.000322	up	cd11061, CYP67-like, cytochrome P450 family 67 and similar cytochrome P450s. This subfamily includes Uromyces viciae-fabae cytochrome P450 67 (CYP67), also called planta-induced rust protein 16, Cystobasidium minutum (Rhodotorula minuta) cytochrome P450rm, and other fungal cytochrome P450s. P450rm catalyzes the formation of isobutene and 4-hydroxylation of benzoate. The gene encoding CYP67 is a p…	pfam00067, p450, Cytochrome P450. Cytochrome P450s are haem-thiolate proteins involved in the oxidative degradation of various compounds. They are particularly well known for their role in the degradation of environmental toxins and mutagens. They can be divided into 4 classes, according to the method by which electrons from NAD(P)H are delivered to the catalytic site. Sequence conservation is re…	-	KOG0158, KOG0158, KOG0158, Cytochrome P450 CYP3/CYP5/CYP6/CYP9 subfamilies [Secondary metabolites biosynthesis, transport and catabolism]. 7.09e-27	sp|E9FCP5|DTXS2_METRA Cytochrome P450 monooxygenase dtxS2 OS=Metarhizium robertsii (strain ARSEF 23 / ATCC MYA-3075) GN=dtxS2 PE=3 SV=2 6.81e-33	-	XP_002067830.1 probable cytochrome P450 4d20 [Drosophila willistoni] >EDW78816.1 uncharacterized protein Dwil_GK12509 [Drosophila willistoni] 3.40e-24	-
TRINITY_DN12774_c0_g1	3.4829	1.14267	1.60789	0.00066562	0.00395869	up	-	-	-	-	-	-	-	-
TRINITY_DN13176_c0_g1	2.52705	7.6903	-1.60558	0.00082976	0.00479698	down	cd12148, fungal_TF_MHR, fungal transcription factor regulatory middle homology region. This domain is present in the large family of fungal zinc cluster transcription factors that contain an N-terminal GAL4-like C6 zinc binuclear cluster DNA-binding domain. Examples of members of this large fungal group are the following Saccharomyces cerevisiae transcription factors, GAL4, STB5, DAL81, CAT8, RDR…	pfam00561, Abhydrolase_1, alpha/beta hydrolase fold. This catalytic domain is found in a very wide range of enzymes. 4.16e-14	-	KOG4178, KOG4178, KOG4178, Soluble epoxide hydrolase [Lipid transport and metabolism]. 6.08e-20	sp|Q6NAM1|DEHA_RHOPA Fluoroacetate dehalogenase OS=Rhodopseudomonas palustris (strain ATCC BAA-98 / CGA009) GN=RPA1163 PE=1 SV=1 4.45e-65	-	CAD7639335.1 unnamed protein product [Oppiella nova] >CAG2162335.1 unnamed protein product [Oppiella nova] 2.66e-71	-
TRINITY_DN6975_c0_g1	6.93828	2.15798	1.6849	5.59416e-05	0.000436338	up	-	-	-	-	-	-	-	-
TRINITY_DN3530_c0_g1	0.396349	5.97786	-3.91479	1.56541e-07	2.01437e-06	down	-	-	-	-	-	-	-	-
TRINITY_DN13599_c0_g1	25.6566	8.24133	1.63838	7.14034e-08	9.6986e-07	up	cd05333, BKR_SDR_c, beta-Keto acyl carrier protein reductase (BKR), involved in Type II FAS, classical (c) SDRs. This subgroup includes the Escherichai coli K12 BKR, FabG. BKR catalyzes the NADPH-dependent reduction of ACP in the first reductive step of de novo fatty acid synthesis (FAS). FAS consists of four elongation steps, which are repeated to extend the fatty acid chain through the addition…	pfam13561, adh_short_C2, Enoyl-(Acyl carrier protein) reductase. 1.60e-15	-	KOG1618, KOG1618, KOG1618, Predicted phosphatase [General function prediction only]. 2.57e-59	sp|O13899|YF38_SCHPO Uncharacterized CDP-alcohol phosphatidyltransferase class-I family protein C22A12.08c OS=Schizosaccharomyces pombe (strain 972 / ATCC 24843) GN=SPAC22A12.08c PE=3 SV=1 1.97e-67	-	XP_027142483.1 estradiol 17-beta-dehydrogenase 8 [Larimichthys crocea] 7.51e-37	-
TRINITY_DN12105_c0_g1	2.846	6.7171	-1.23891	0.00982662	0.0388186	down	-	-	-	KOG1399, KOG1399, KOG1399, Flavin-containing monooxygenase [Secondary metabolites biosynthesis, transport and catabolism]. 2.01e-08	sp|Q00730|STCW_EMENI Putative sterigmatocystin biosynthesis monooxygenase stcW OS=Emericella nidulans (strain FGSC A4 / ATCC 38163 / CBS 112.46 / NRRL 194 / M139) GN=stcW PE=3 SV=2 5.25e-84	-	CAF1310605.1 unnamed protein product [Adineta steineri] >CAF1418807.1 unnamed protein product [Adineta steineri] >CAF3995424.1 unnamed protein product [Adineta steineri] >CAF4041467.1 unnamed protein product [Adineta steineri] 5.96e-99	-
TRINITY_DN13787_c0_g4	1.99781	10.9189	-2.45033	0.000644875	0.00384722	down	-	pfam06985, HET, Heterokaryon incompatibility protein (HET). This family represents a conserved region approximately 150 residues long within various heterokaryon incompatibility proteins that seem to be restricted to ascomycete fungi. Genetic differences in specific het genes prevent a viable heterokaryotic fungal cell from being formed by the fusion of filaments from two different wild-type stra…	-	-	-	-	KAI1693513.1 heterokaryon incompatibility protein (HET) domain-containing protein [Ditylenchus destructor] 5.48e-10	-
TRINITY_DN13853_c2_g2	62.4982	231.118	-1.88675	1.78797e-11	3.90305e-10	down	cd06097, Aspergillopepsin_like, Aspergillopepsin_like, aspartic proteases of fungal origin. The members of this family are aspartic proteases of fungal origin, including aspergillopepsin, rhizopuspepsin, endothiapepsin, and rodosporapepsin. The various fungal species in this family may be the most economically important genus of fungi. They may serve as virulence factors or as industrial aids. Fo…	pfam00026, Asp, Eukaryotic aspartyl protease. Aspartyl (acid) proteases include pepsins, cathepsins, and renins. Two-domain structure, probably arising from ancestral duplication. This family does not include the retroviral nor retrotransposon proteases (pfam00077), which are much smaller and appear to be homologous to a single domain of the eukaryotic asp proteases. 3.63e-49	-	KOG1339, KOG1339, KOG1339, Aspartyl protease [Posttranslational modification, protein turnover, chaperones]. 1.84e-17	sp|P11838|CARP_CRYPA Endothiapepsin OS=Cryphonectria parasitica GN=EAPA PE=1 SV=2 3.26e-141	GO:0000322, storage vacuole;GO:0000323, lytic vacuole;GO:0000324, fungal-type vacuole;GO:0003674, molecular_function;GO:0003824, catalytic activity;GO:0004177, aminopeptidase activity;GO:0005575, cellular_component;GO:0005622, intracellular;GO:0005623, cell;GO:0005737, cytoplasm;GO:0005773, vacuole;GO:0006508, proteolysis;GO:0006807, nitrogen compound metabolic process;GO:0007039, protein catabol…	KAJ3029913.1 hypothetical protein HDU68_010696 [Siphonaria sp. JEL0065] 1.54e-50	-
TRINITY_DN13980_c1_g1	331.839	0.797187	8.70135	5.74191e-23	3.71209e-21	up	-	pfam00264, Tyrosinase, Common central domain of tyrosinase. This family also contains polyphenol oxidases and some hemocyanins. Binds two copper ions via two sets of three histidines. This family is related to pfam00372. 3.07e-11	K00505-ko00350 Tyrosine metabolism;ko00740 Riboflavin metabolism;ko00950 Isoquinoline alkaloid biosynthesis;ko00965 Betalain biosynthesis;ko04916 Melanogenesis	-	sp|P07524|TYRO_STRAT Tyrosinase OS=Streptomyces antibioticus GN=melC2 PE=3 SV=2 4.08e-07	-	KAI1888175.1 hypothetical protein AGOR_G00182320 [Albula goreensis] 2.95e-08	-
TRINITY_DN9207_c0_g1	4.45492	39.953	-3.16483	8.08975e-10	1.43513e-08	down	-	-	-	-	-	-	GCC48159.1 hypothetical protein [Chiloscyllium punctatum] 1.79e-11	-
TRINITY_DN9804_c0_g1	7.75356	47.3794	-2.61133	2.85887e-11	6.10211e-10	down	cd00608, GalT, Galactose-1-phosphate uridyl transferase (GalT): This enzyme plays a key role in galactose metabolism by catalysing the transfer of a uridine 5'-phosphoryl group from UDP-galactose 1-phosphate. The structure of E.coli GalT reveals that the enzyme contains two identical subunits. It also demonstrates that the active site is formed by amino acid residues from both subunits of the dim…	pfam02744, GalP_UDP_tr_C, Galactose-1-phosphate uridyl transferase, C-terminal domain. SCOP reports fold duplication with N-terminal domain. Both involved in Zn and Fe binding. 3.42e-54	K00965-ko00052 Galactose metabolism;ko00520 Amino sugar and nucleotide sugar metabolism;ko04917 Prolactin signaling pathway	KOG2958, KOG2958, KOG2958, Galactose-1-phosphate uridylyltransferase [Energy production and conversion]. 3.65e-94	sp|Q96UI1|GAL7_HYPJE Galactose-1-phosphate uridylyltransferase OS=Hypocrea jecorina GN=gal7 PE=3 SV=1 4.86e-170	GO:0003674, molecular_function;GO:0003824, catalytic activity;GO:0004335, galactokinase activity;GO:0005488, binding;GO:0005506, iron ion binding;GO:0005575, cellular_component;GO:0005622, intracellular;GO:0005623, cell;GO:0005737, cytoplasm;GO:0005829, cytosol;GO:0005975, carbohydrate metabolic process;GO:0005996, monosaccharide metabolic process;GO:0006012, galactose metabolic process;GO:000613…	GBM37741.1 Galactose-1-phosphate uridylyltransferase [Araneus ventricosus] 3.56e-75	Archips xylosteana genome assembly, chromosome: 27 8.48e-13
TRINITY_DN4060_c0_g1	1.71861	60.4209	-5.13573	1.56119e-24	1.11666e-22	down	-	pfam07519, Tannase, Tannase and feruloyl esterase. This family includes fungal tannase and feruloyl esterase. It also includes several bacterial homologs of unknown function. 2.23e-51	-	-	sp|P78581|TAN_ASPOR Tannase OS=Aspergillus oryzae (strain ATCC 42149 / RIB 40) GN=AO090103000074 PE=1 SV=1 5.44e-136	-	XP_020807431.1 uncharacterized protein LOC110183487 [Drosophila serrata] >XP_020814795.1 uncharacterized protein LOC110189169 [Drosophila serrata] 9.55e-21	-
TRINITY_DN9007_c0_g1	2.67528	0.299418	3.15946	0.000339518	0.00219074	up	cd00312, Esterase_lipase, Esterases and lipases (includes fungal lipases, cholinesterases, etc.) These enzymes act on carboxylic esters (EC: 3.1.1.-). The catalytic apparatus involves three residues (catalytic triad): a serine, a glutamate or aspartate and a histidine.These catalytic residues are responsible for the nucleophilic attack on the carbonyl carbon atom of the ester bond. In contrast wi…	pfam00135, COesterase, Carboxylesterase family. 2.00e-21	-	KOG1516, KOG1516, KOG1516, Carboxylesterase and related proteins [General function prediction only]. 3.32e-22	sp|D4B1N9|LIP3_ARTBC Probable secreted lipase ARB_02369 OS=Arthroderma benhamiae (strain ATCC MYA-4681 / CBS 112371) GN=ARB_02369 PE=1 SV=1 4.01e-24	-	KAI8491778.1 Carboxylesterase 5A [Branchiostoma belcheri] 2.42e-24	-
TRINITY_DN7144_c0_g1	18.2456	71.0652	-1.96159	2.74696e-06	2.87458e-05	down	-	pfam12146, Hydrolase_4, Serine aminopeptidase, S33. This domain is found in bacteria and eukaryotes and is approximately 110 amino acids in length. It is found in association with pfam00561. The majority of the members in this family carry the exopeptidase active-site residues of Ser-122, Asp-239 and His-269 as in UniProtKB:Q7ZWC2. 1.14e-25	K01054-ko04923 Regulation of lipolysis in adipocyte;ko00561 Glycerolipid metabolism;ko04723 Retrograde endocannabinoid signaling	KOG1455, KOG1455, KOG1455, Lysophospholipase [Lipid transport and metabolism]. 6.81e-16	sp|O94305|MGLL_SCHPO Putative monoglyceride lipase OS=Schizosaccharomyces pombe (strain 972 / ATCC 24843) GN=SPCC5E4.05c PE=1 SV=1 1.12e-30	GO:0003674, molecular_function;GO:0003824, catalytic activity;GO:0005575, cellular_component;GO:0005622, intracellular;GO:0005623, cell;GO:0005737, cytoplasm;GO:0005739, mitochondrion;GO:0005740, mitochondrial envelope;GO:0005741, mitochondrial outer membrane;GO:0005783, endoplasmic reticulum;GO:0005811, lipid droplet;GO:0005886, plasma membrane;GO:0006629, lipid metabolic process;GO:0006638, neu…	NP_956591.1 monoglyceride lipase [Danio rerio] >AAH49487.1 Monoglyceride lipase [Danio rerio] >AAQ97815.1 monoglyceride lipase [Danio rerio] 5.34e-26	-
TRINITY_DN23098_c0_g1	15.2062	6.53354	1.21872	0.00332899	0.0157957	up	cd06178, MFS_unc93-like, Uncharacterized Unc-93-like proteins of the Major Facilitator Superfamily of transporters. This subfamily consists of uncharacterized proteins, mainly from fungi and plants, with similarity to Caenorhabditis elegans uncoordinated protein 93 (also called putative potassium channel regulatory protein unc-93). Unc-93 acts as a regulatory subunit of a multi-subunit potassium …	pfam04082, Fungal_trans, Fungal specific transcription factor domain. 2.99e-10	-	-	sp|P38699|STB5_YEAST Protein STB5 OS=Saccharomyces cerevisiae (strain ATCC 204508 / S288c) GN=STB5 PE=1 SV=1 4.82e-30	-	KAJ3012667.1 hypothetical protein HDU68_001081 [Siphonaria sp. JEL0065] 1.46e-17	-
TRINITY_DN13319_c0_g1	39.7401	1.03459	5.26346	1.17675e-28	1.16351e-26	up	-	pfam11807, DUF3328, Domain of unknown function (DUF3328). This family of proteins are functionally uncharacterized. This family is only found in eukaryotes. 7.45e-30	-	-	-	-	-	-
TRINITY_DN11232_c0_g1	24.8999	245.217	-3.29985	4.51063e-17	1.72314e-15	down	-	pfam14087, DUF4267, Domain of unknown function (DUF4267). This family of integral membrane proteins is functionally uncharacterized. This family of proteins is found in bacteria and eukaryotes. Proteins in this family are typically between 126 and 142 amino acids in length. 2.73e-07	-	-	-	-	-	-
TRINITY_DN12556_c0_g1	0.722201	10.8386	-3.90764	9.27772e-16	3.11894e-14	down	cd17327, MFS_FEN2_like, Pantothenate transporter FEN2 and similar transporters of the Major Facilitator Superfamily. This family is composed of Saccharomyces cerevisiae pantothenate transporter FEN2 (or fenpropimorph resistance protein 2) and similar proteins from fungi and bacteria including fungal vitamin H transporter, allantoate permease, and high-affinity nicotinic acid transporter, as well …	-	-	KOG2533, KOG2533, KOG2533, Permease of the major facilitator superfamily [Carbohydrate transport and metabolism]. 2.30e-56	sp|Q9P6J0|YHDC_SCHPO Uncharacterized transporter C1683.12 OS=Schizosaccharomyces pombe (strain 972 / ATCC 24843) GN=SPBC1683.12 PE=3 SV=1 2.72e-68	-	CAF1145905.1 unnamed protein product [Adineta steineri] >CAF3632570.1 unnamed protein product [Adineta steineri] 1.04e-93	-
TRINITY_DN12377_c0_g1	65.7826	1330.92	-4.33858	3.04909e-18	1.26546e-16	down	cd00340, GSH_Peroxidase, Glutathione (GSH) peroxidase family; tetrameric selenoenzymes that catalyze the reduction of a variety of hydroperoxides including lipid peroxidases, using GSH as a specific electron donor substrate. GSH peroxidase contains one selenocysteine residue per subunit, which is involved in catalysis. Different isoenzymes are known in mammals,which are involved in protection aga…	pfam00255, GSHPx, Glutathione peroxidase. 5.21e-33	K00432-ko00480 Glutathione metabolism;ko00590 Arachidonic acid metabolism;ko04918 Thyroid hormone synthesis	KOG1651, KOG1651, KOG1651, Glutathione peroxidase [Posttranslational modification, protein turnover, chaperones]. 8.57e-44	sp|P38143|GPX2_YEAST Glutathione peroxidase 2 OS=Saccharomyces cerevisiae (strain ATCC 204508 / S288c) GN=GPX2 PE=1 SV=1 1.97e-55	GO:0000302, response to reactive oxygen species;GO:0003674, molecular_function;GO:0003824, catalytic activity;GO:0004601, peroxidase activity;GO:0005575, cellular_component;GO:0005622, intracellular;GO:0005623, cell;GO:0005737, cytoplasm;GO:0005739, mitochondrion;GO:0005829, cytosol;GO:0006950, response to stress;GO:0006979, response to oxidative stress;GO:0008150, biological_process;GO:0008152, …	QRW45203.1 glutathione peroxidase, partial [Macrosiphum euphorbiae] 4.57e-56	Macrosiphum euphorbiae glutathione peroxidase (GPx) mRNA, partial cds 1.73e-38
TRINITY_DN12377_c0_g2	25.1293	216.293	-3.10555	8.8807e-15	2.79016e-13	down	-	-	-	KOG2852, KOG2852, KOG2852, Possible oxidoreductase [General function prediction only]. 1.25e-47	sp|P38758|TDA3_YEAST Putative oxidoreductase TDA3 OS=Saccharomyces cerevisiae (strain ATCC 204508 / S288c) GN=TDA3 PE=1 SV=2 2.75e-11	GO:0000003, reproduction;GO:0003674, molecular_function;GO:0003824, catalytic activity;GO:0005575, cellular_component;GO:0005622, intracellular;GO:0005623, cell;GO:0005737, cytoplasm;GO:0005739, mitochondrion;GO:0005768, endosome;GO:0005770, late endosome;GO:0006810, transport;GO:0007049, cell cycle;GO:0008150, biological_process;GO:0008152, metabolic process;GO:0009987, cellular process;GO:00125…	TRY62899.1 hypothetical protein TCAL_08189 [Tigriopus californicus] 4.78e-41	-
TRINITY_DN9488_c0_g1	28.3865	11.1919	1.34275	4.34309e-06	4.3845e-05	up	-	-	-	-	-	-	-	-
TRINITY_DN10945_c0_g1	11.1061	4.63447	1.26088	0.00119602	0.00658322	up	-	pfam11374, DUF3176, Protein of unknown function (DUF3176). This eukaryotic family of proteins has no known function. 9.02e-14	-	-	-	-	-	-
TRINITY_DN8446_c0_g1	3.28015	24.6584	-2.91025	3.02274e-09	4.95693e-08	down	-	-	-	-	-	-	-	-
TRINITY_DN9495_c0_g1	2.78412	13.4993	-2.2776	0.00107223	0.00598514	down	-	-	-	-	-	-	-	-
TRINITY_DN8409_c0_g1	1.26192	19.356	-3.93909	7.40199e-17	2.77255e-15	down	cd17327, MFS_FEN2_like, Pantothenate transporter FEN2 and similar transporters of the Major Facilitator Superfamily. This family is composed of Saccharomyces cerevisiae pantothenate transporter FEN2 (or fenpropimorph resistance protein 2) and similar proteins from fungi and bacteria including fungal vitamin H transporter, allantoate permease, and high-affinity nicotinic acid transporter, as well …	-	-	KOG2533, KOG2533, KOG2533, Permease of the major facilitator superfamily [Carbohydrate transport and metabolism]. 3.66e-08	sp|O94491|YC7A_SCHPO Uncharacterized transporter C417.10 OS=Schizosaccharomyces pombe (strain 972 / ATCC 24843) GN=SPCC417.10 PE=3 SV=1 2.98e-25	-	KAI1695427.1 fungal specific transcription factor domain-containing protein [Ditylenchus destructor] 9.66e-06	-
TRINITY_DN14197_c1_g9	2.15954	146.316	-6.08222	1.29589e-23	8.75669e-22	down	-	-	-	-	-	-	-	-
TRINITY_DN14197_c1_g3	14.2838	40.4572	-1.50202	5.89665e-06	5.80896e-05	down	sd00045, ANK, ankyrin repeats. Ankyrin repeats are one of the most abundant repeat motifs, and generally function as scaffolds for protein-protein interactions in processes including cell cycle, transcriptional regulation, signal transduction, vesicular trafficking, and inflammatory response. Although predominantly found in eukaryotic proteins, they are also found in some bacterial and viral prot…	pfam12796, Ank_2, Ankyrin repeats (3 copies). 7.53e-06	-	KOG4177, KOG4177, KOG4177, Ankyrin [Cell wall/membrane/envelope biogenesis]. 2.48e-08	sp|Q8UVC3|INVS_CHICK Inversin OS=Gallus gallus GN=INVS PE=2 SV=2 2.24e-12	-	KAI6196797.1 Non-specific serine/threonine protein kinase [Aphelenchoides besseyi] 8.06e-08	-
TRINITY_DN14197_c1_g4	405.548	1821.86	-2.16746	5.10307e-06	5.07177e-05	down	-	pfam10355, Ytp1, Protein of unknown function (Ytp1). This is a family of proteins found in fungi. The region appears to contain regions similar to mitochondrial electron transport proteins. The C-terminal domain is hydrophobic and negatively charged. There are consensus sites for both N-linked glycosylation and cAMP-dependent protein kinase phosphorylation. 1.73e-74	-	-	sp|O59714|YBH6_SCHPO Uncharacterized membrane protein C3B8.06 OS=Schizosaccharomyces pombe (strain 972 / ATCC 24843) GN=SPBC3B8.06 PE=1 SV=1 9.64e-58	GO:0005575, cellular_component;GO:0005622, intracellular;GO:0005623, cell;GO:0005737, cytoplasm;GO:0008150, biological_process;GO:0008361, regulation of cell size;GO:0009987, cellular process;GO:0016020, membrane;GO:0016021, integral component of membrane;GO:0016043, cellular component organization;GO:0031224, intrinsic component of membrane;GO:0032535, regulation of cellular component size;GO:00…	-	-
TRINITY_DN14715_c0_g1	11.6381	47.1942	-2.01975	1.64835e-06	1.79331e-05	down	-	-	-	-	-	-	-	-
TRINITY_DN13750_c0_g1	40.2129	193.298	-2.2651	4.9065e-09	7.79878e-08	down	-	pfam01915, Glyco_hydro_3_C, Glycosyl hydrolase family 3 C-terminal domain. This domain is involved in catalysis and may be involved in binding beta-glucan. This domain is found associated with pfam00933. 1.35e-26	-	-	sp|Q5BFG8|BGLB_EMENI Beta-glucosidase B OS=Emericella nidulans (strain FGSC A4 / ATCC 38163 / CBS 112.46 / NRRL 194 / M139) GN=bglB PE=1 SV=1 3.36e-83	-	MCL4141981.1 hypothetical protein [Idotea baltica] 9.67e-42	-
TRINITY_DN12338_c0_g1	1.74454	37.4283	-4.42321	6.45158e-17	2.42331e-15	down	-	-	-	-	-	-	-	-
TRINITY_DN13877_c4_g1	21.0648	77.9036	-1.88686	5.13839e-07	6.10388e-06	down	cd08734, RGS-like_1, Uncharacterized Regulator of G protein Signaling (RGS) domain subfamily, child 1. These uncharacterized RGS-like domains consists largely of hypothetical proteins. The RGS domain is an essential part of the Regulator of G-protein Signaling (RGS) protein family, a diverse group of multifunctional proteins that regulate cellular signaling events downstream of G-protein coupled …	-	-	-	-	-	KAI1691420.1 hypothetical protein Ddc_24231 [Ditylenchus destructor] 1.00e-35	-
TRINITY_DN13877_c4_g2	34.8844	12.7694	1.44989	0.00720981	0.0300901	up	-	-	-	-	-	-	-	-
TRINITY_DN12917_c0_g1	501.065	243.231	1.04267	6.86609e-05	0.000524891	up	-	pfam10287, DUF2401, Putative TOS1-like glycosyl hydrolase (DUF2401). This family of proteins is conserved in fungi. One member is annotated putatively as OPEL, a house-keeping protein, but this could not be confirmed. It contains 5 highly conserved cysteines two of which form a characteristic CGC sequence motif. It has recently been shown that this family is related to known glycosyl hydrolases. …	-	-	sp|D4AQ83|PGA52_ARTBC PGA52-like protein ARB_06390 OS=Arthroderma benhamiae (strain ATCC MYA-4681 / CBS 112371) GN=ARB_06390 PE=3 SV=1 6.57e-70	GO:0000271, polysaccharide biosynthetic process;GO:0000322, storage vacuole;GO:0000323, lytic vacuole;GO:0000324, fungal-type vacuole;GO:0003674, molecular_function;GO:0003824, catalytic activity;GO:0003843, 1,3-beta-D-glucan synthase activity;GO:0005575, cellular_component;GO:0005618, cell wall;GO:0005622, intracellular;GO:0005623, cell;GO:0005737, cytoplasm;GO:0005773, vacuole;GO:0005975, carbo…	-	-
TRINITY_DN10014_c0_g1	0.433235	6.98982	-4.01203	8.70988e-11	1.7507e-09	down	cd11059, CYP_fungal, unknown subfamily of fungal cytochrome P450s. This subfamily is composed of uncharacterized fungal cytochrome P450s. Cytochrome P450 (P450, CYP) is a large superfamily of heme-containing proteins that catalyze a variety of oxidative reactions of a large number of structurally different endogenous and exogenous compounds in organisms from all major domains of life. CYPs bind t…	pfam00067, p450, Cytochrome P450. Cytochrome P450s are haem-thiolate proteins involved in the oxidative degradation of various compounds. They are particularly well known for their role in the degradation of environmental toxins and mutagens. They can be divided into 4 classes, according to the method by which electrons from NAD(P)H are delivered to the catalytic site. Sequence conservation is re…	-	KOG0157, KOG0157, KOG0157, Cytochrome P450 CYP4/CYP19/CYP26 subfamilies [Secondary metabolites biosynthesis, transport and catabolism, Lipid transport and metabolism]. 5.28e-30	sp|Q12608|STCB_EMENI Probable sterigmatocystin biosynthesis P450 monooxygenase STCB OS=Emericella nidulans (strain FGSC A4 / ATCC 38163 / CBS 112.46 / NRRL 194 / M139) GN=stcB PE=3 SV=2 1.91e-98	-	KAG4071074.1 hypothetical protein HA402_002746 [Bradysia odoriphaga] 3.08e-40	-
TRINITY_DN12465_c0_g1	10.6901	26.7868	-1.32524	0.00248746	0.0123519	down	cd06179, MFS_TRI12_like, Fungal trichothecene efflux pump (TRI12) of the Major Facilitator Superfamily of transporters. This family includes Fusarium sporotrichioides trichothecene efflux pump (TRI12), which may play a role in F. sporotrichioides self-protection against trichothecenes. TRI12 belongs to the Major Facilitator Superfamily (MFS) of membrane transport proteins, which are thought to fu…	pfam06609, TRI12, Fungal trichothecene efflux pump (TRI12). This family consists of several fungal specific trichothecene efflux pump proteins. Many of the genes involved in trichothecene toxin biosynthesis in Fusarium sporotrichioides are present within a gene cluster.It has been suggested that TRI12 may play a role in F. sporotrichioides self-protection against trichothecenes. 5.59e-08	-	-	sp|B6HJU0|ROQT_PENRW Efflux pump roqT OS=Penicillium rubens (strain ATCC 28089 / DSM 1075 / NRRL 1951 / Wisconsin 54-1255) GN=roqT PE=1 SV=1 1.71e-94	-	KAJ3024382.1 hypothetical protein HDU68_008231 [Siphonaria sp. JEL0065] 4.21e-59	-
TRINITY_DN7959_c0_g1	1.45547	8.81326	-2.59819	0.0131126	0.0489792	down	-	-	-	-	-	-	-	-
TRINITY_DN11268_c0_g1	1.09551	4.45999	-2.02544	0.00870137	0.0350847	down	cd09807, retinol-DH_like_SDR_c, retinol dehydrogenases (retinol-DHs), classical (c) SDRs. Classical SDR-like subgroup containing retinol-DHs and related proteins. Retinol is processed by a medium chain alcohol dehydrogenase followed by retinol-DHs. Proteins in this subfamily share the glycine-rich NAD-binding motif of the classical SDRs, have a partial match to the canonical active site tetrad, b…	pfam00106, adh_short, short chain dehydrogenase. This family contains a wide variety of dehydrogenases. 9.61e-13	-	KOG1208, KOG1208, KOG1208, Dehydrogenases with different specificities (related to short-chain alcohol dehydrogenases) [Secondary metabolites biosynthesis, transport and catabolism]. 4.55e-17	sp|O74959|YJCD_SCHPO Uncharacterized oxidoreductase C736.13 OS=Schizosaccharomyces pombe (strain 972 / ATCC 24843) GN=SPCC736.13 PE=3 SV=1 5.64e-30	-	XP_017846266.1 retinol dehydrogenase 12-like [Drosophila busckii] 1.00e-31	-
TRINITY_DN8561_c0_g1	19.2922	2.86401	2.75191	5.58717e-10	1.01665e-08	up	cd11665, LamB_like, Aspergillus nidulans lactam utilization protein LamB and similar proteins. This eukaryotic and bacterial subfamily of the LamB/YbgL family, includes Aspergillus nidulans protein LamB. The lamb gene locates at the lam locus of Aspergillus nidulans, consisting of two divergently transcribed genes, lamA and lamB, needed for the utilization of lactams such as 2-pyrrolidinone. Both…	pfam03746, LamB_YcsF, LamB/YcsF family. This family includes LamB. The lam locus of Aspergillus nidulans consists of two divergently transcribed genes, lamA and lamB, involved in the utilisation of lactams such as 2-pyrrolidinone. Both genes are under the control of the positive regulatory gene amdR and are subject to carbon and nitrogen metabolite repression. The exact molecular function of the …	-	-	sp|P38096|LAMB_EMENI Lactam utilization protein lamB OS=Emericella nidulans (strain FGSC A4 / ATCC 38163 / CBS 112.46 / NRRL 194 / M139) GN=lamB PE=2 SV=2 3.65e-12	-	CAF1089656.1 unnamed protein product [Rotaria sordida] 1.28e-36	-
TRINITY_DN10621_c0_g1	13.4052	5.78389	1.21268	0.000544151	0.00330646	up	cd18016, DEXHc_RecQ2_BLM, DEAH-box helicase domain of RecQ2. ATP-dependent DNA helicase Q2 (RecQ2, also called Bloom syndrome protein homolog or BLM) is part of the RecQ family of highly conserved DNA repair helicases that is part of the type II DEAD box helicase superfamily, a diverse family of proteins involved in ATP-dependent RNA or DNA unwinding. This domain contains the ATP-binding region. …	-	K10901-ko03460 Fanconi anemia pathway;ko03440 Homologous recombination	KOG0351, KOG0351, KOG0351, ATP-dependent DNA helicase [Replication, recombination and repair]. 7.72e-79	sp|O88700|BLM_MOUSE Bloom syndrome protein homolog OS=Mus musculus GN=Blm PE=1 SV=1 6.44e-84	-	KAI8508794.1 ATP-dependent DNA helicase Q5 [Branchiostoma belcheri] 9.99e-87	-
TRINITY_DN10586_c0_g1	5.47567	2.50331	1.1292	0.0107056	0.0415465	up	cd11070, CYP56-like, cytochrome P450 family 56-like fungal cytochrome P450s. This group includes Saccharomyces cerevisiae cytochrome P450 56, also called cytochrome P450-DIT2, and similar fungal proteins. CYP56 is involved in spore wall maturation and is thought to catalyze the oxidation of tyrosine residues in the formation of LL-dityrosine-containing precursors of the spore wall. The CYP56-like…	pfam00067, p450, Cytochrome P450. Cytochrome P450s are haem-thiolate proteins involved in the oxidative degradation of various compounds. They are particularly well known for their role in the degradation of environmental toxins and mutagens. They can be divided into 4 classes, according to the method by which electrons from NAD(P)H are delivered to the catalytic site. Sequence conservation is re…	-	KOG0157, KOG0157, KOG0157, Cytochrome P450 CYP4/CYP19/CYP26 subfamilies [Secondary metabolites biosynthesis, transport and catabolism, Lipid transport and metabolism]. 3.99e-26	sp|Q9SHG5|C72C1_ARATH Cytochrome P450 72C1 OS=Arabidopsis thaliana GN=CYP72C1 PE=2 SV=2 2.02e-21	-	KAJ3021588.1 hypothetical protein HDU68_009540 [Siphonaria sp. JEL0065] 1.39e-51	-
TRINITY_DN7623_c0_g2	61.4462	24.2421	1.34181	0.00029164	0.00192239	up	-	pfam00565, SNase, Staphylococcal nuclease homolog. Present in all three domains of cellular life. Four copies in the transcriptional coactivator p100: these, however, appear to lack the active site residues of Staphylococcal nuclease. Positions 14 (Asp-21), 34 (Arg-35), 39 (Asp-40), 42 (Glu-43) and 110 (Arg-87) [SNase numbering in parentheses] are thought to be involved in substrate-binding and c…	-	-	sp|C7YQ31|LCL3_NECH7 Probable endonuclease LCL3 OS=Nectria haematococca (strain 77-13-4 / ATCC MYA-4622 / FGSC 9596 / MPVI) GN=LCL3 PE=3 SV=1 6.98e-79	GO:0003674, molecular_function;GO:0003824, catalytic activity;GO:0004518, nuclease activity;GO:0005575, cellular_component;GO:0005622, intracellular;GO:0005623, cell;GO:0005634, nucleus;GO:0005737, cytoplasm;GO:0005739, mitochondrion;GO:0006139, nucleobase-containing compound metabolic process;GO:0006401, RNA catabolic process;GO:0006725, cellular aromatic compound metabolic process;GO:0006807, n…	XP_013174247.1 PREDICTED: probable endonuclease LCL3 [Papilio xuthus] 1.33e-18	-
TRINITY_DN6789_c0_g1	17.5527	4.8283	1.86211	0.000491509	0.00302763	up	-	-	-	KOG2675, KOG2675, KOG2675, Adenylate cyclase-associated protein (CAP/Srv2p) [Cytoskeleton, Signal transduction mechanisms]. 8.08e-32	sp|Q3SYV4|CAP1_BOVIN Adenylyl cyclase-associated protein 1 OS=Bos taurus GN=CAP1 PE=2 SV=3 2.44e-27	GO:0000902, cell morphogenesis;GO:0000935, division septum;GO:0003674, molecular_function;GO:0003779, actin binding;GO:0005488, binding;GO:0005515, protein binding;GO:0005575, cellular_component;GO:0005622, intracellular;GO:0005623, cell;GO:0005737, cytoplasm;GO:0005856, cytoskeleton;GO:0005937, mating projection;GO:0005938, cell cortex;GO:0006996, organelle organization;GO:0007010, cytoskeleton …	XP_042295616.1 adenylyl cyclase-associated protein 1 [Sceloporus undulatus] >XP_042295617.1 adenylyl cyclase-associated protein 1 [Sceloporus undulatus] 1.62e-29	-
TRINITY_DN10454_c0_g1	3.32911	10.642	-1.67656	0.000949174	0.00538092	down	-	pfam11905, DUF3425, Domain of unknown function (DUF3425). This presumed domain is functionally uncharacterized. This domain is found in eukaryotes. This domain is typically between 120 to 143 amino acids in length. 2.54e-06	-	-	sp|D7UQ40|SOL5_ALTSO Bifunctional solanapyrone synthase OS=Alternaria solani GN=sol5 PE=1 SV=1 2.61e-11	-	CAF4389920.1 unnamed protein product, partial [Adineta steineri] 2.54e-08	-
TRINITY_DN13530_c0_g1	2.58678	21.7135	-3.06936	7.7388e-18	3.13445e-16	down	-	-	-	-	-	-	-	-
TRINITY_DN9431_c0_g1	186.912	92.9362	1.00805	0.006017	0.0259412	up	-	pfam01105, EMP24_GP25L, emp24/gp25L/p24 family/GOLD. Members of this family are implicated in bringing cargo forward from the ER and binding to coat proteins by their cytoplasmic domains. This domain corresponds closely to the beta-strand rich GOLD domain described in. The GOLD domain is always found combined with lipid- or membrane-association domains. 2.22e-17	-	KOG1691, KOG1691, KOG1691, emp24/gp25L/p24 family of membrane trafficking proteins [Intracellular trafficking, secretion, and vesicular transport]. 9.41e-29	sp|Q4HY20|TMEDA_GIBZE Endoplasmic reticulum vesicle protein 25 OS=Gibberella zeae (strain PH-1 / ATCC MYA-4620 / FGSC 9075 / NRRL 31084) GN=ERV25 PE=3 SV=1 3.47e-88	GO:0000322, storage vacuole;GO:0000323, lytic vacuole;GO:0000324, fungal-type vacuole;GO:0005575, cellular_component;GO:0005622, intracellular;GO:0005623, cell;GO:0005737, cytoplasm;GO:0005773, vacuole;GO:0005798, Golgi-associated vesicle;GO:0005886, plasma membrane;GO:0006810, transport;GO:0006886, intracellular protein transport;GO:0006888, ER to Golgi vesicle-mediated transport;GO:0008104, pro…	XP_013397521.1 transmembrane emp24 domain-containing protein 10 [Lingula anatina] 1.79e-21	-
TRINITY_DN9907_c0_g1	2.37205	0.815609	1.54018	0.00261035	0.0128559	up	sd00045, ANK, ankyrin repeats. Ankyrin repeats are one of the most abundant repeat motifs, and generally function as scaffolds for protein-protein interactions in processes including cell cycle, transcriptional regulation, signal transduction, vesicular trafficking, and inflammatory response. Although predominantly found in eukaryotic proteins, they are also found in some bacterial and viral prot…	-	-	KOG4177, KOG4177, KOG4177, Ankyrin [Cell wall/membrane/envelope biogenesis]. 1.29e-06	sp|P16157|ANK1_HUMAN Ankyrin-1 OS=Homo sapiens GN=ANK1 PE=1 SV=3 1.48e-06	-	-	-
TRINITY_DN11693_c0_g1	49.42	22.3781	1.14301	0.000134412	0.000959364	up	-	pfam11790, Glyco_hydro_cc, Glycosyl hydrolase catalytic core. This family is probably a glycosyl hydrolase, and is conserved in fungi and some Proteobacteria. The pombe member is annotated as being from IPR013781. 5.65e-48	-	-	sp|Q09788|ASL1_SCHPO Alkali-sensitive linkage protein 1 OS=Schizosaccharomyces pombe (strain 972 / ATCC 24843) GN=asl1 PE=1 SV=1 2.27e-15	-	CAF3972720.1 unnamed protein product [Adineta steineri] 3.81e-26	-
TRINITY_DN15951_c0_g1	13.3554	39.9921	-1.58229	0.000154773	0.00108567	down	-	pfam01408, GFO_IDH_MocA, Oxidoreductase family, NAD-binding Rossmann fold. This family of enzymes utilize NADP or NAD. This family is called the GFO/IDH/MOCA family in swiss-prot. 2.08e-08	-	KOG2742, KOG2742, KOG2742, Predicted oxidoreductase [General function prediction only]. 1.13e-20	sp|O42896|YBQ3_SCHPO Uncharacterized oxidoreductase C115.03 OS=Schizosaccharomyces pombe (strain 972 / ATCC 24843) GN=SPBC115.03 PE=3 SV=1 5.16e-61	GO:0003674, molecular_function;GO:0003824, catalytic activity;GO:0006139, nucleobase-containing compound metabolic process;GO:0006725, cellular aromatic compound metabolic process;GO:0006732, coenzyme metabolic process;GO:0006733, oxidoreduction coenzyme metabolic process;GO:0006739, NADP metabolic process;GO:0006740, NADPH regeneration;GO:0006753, nucleoside phosphate metabolic process;GO:000679…	KAG4069327.1 hypothetical protein HA402_012180 [Bradysia odoriphaga] 6.18e-57	-
TRINITY_DN16084_c0_g1	0.0001	1.44876	-13.8225	0.00513296	0.0227955	down	-	-	-	-	-	-	-	-
TRINITY_DN11075_c0_g1	21.6491	68.3031	-1.65764	2.36184e-05	0.00020269	down	cd05540, UreG, urease accessory protein UreG. UreG is one of the four accessory proteins of urease. Urease is an enzyme which catalyzes the decomposition of urea to form ammonia and carbon dioxide. Bacterial urease is a trimer of three subunits which are encoded by genes ureA, ureB, and ureC. Up to four accessory proteins (ureD, ureE, ureF, and ureG) are required for urease catalytical function. …	pfam02492, cobW, CobW/HypB/UreG, nucleotide-binding domain. This domain is found in HypB, a hydrogenase expression / formation protein, and UreG a urease accessory protein. Both these proteins contain a P-loop nucleotide binding motif. HypB has GTPase activity and is a guanine nucleotide binding protein. It is not known whether UreG binds GTP or some other nucleotide. Both enzymes are involved in…	-	-	sp|E0ZS47|UREG_ORYSI Urease accessory protein G OS=Oryza sativa subsp. indica GN=UREG PE=2 SV=1 2.52e-96	GO:0006807, nitrogen compound metabolic process;GO:0008150, biological_process;GO:0008152, metabolic process;GO:0009987, cellular process;GO:0019627, urea metabolic process;GO:0034641, cellular nitrogen compound metabolic process;GO:0043603, cellular amide metabolic process;GO:0044237, cellular metabolic process;GO:0044281, small molecule metabolic process;GO:0071704, organic substance metabolic …	KAJ3013034.1 hypothetical protein HDU68_000898 [Siphonaria sp. JEL0065] 1.66e-93	PREDICTED: Dermacentor andersoni urease accessory protein UreG-like (LOC126519042), mRNA 1.81e-74
TRINITY_DN13982_c0_g1	0.9257	10.3485	-3.48274	2.15769e-08	3.12993e-07	down	cd12453, RRM1_RIM4_like, RNA recognition motif 1 (RRM1) found in yeast meiotic activator RIM4 and similar proteins. This subfamily corresponds to the RRM1 of RIM4, also termed regulator of IME2 protein 4, a putative RNA binding protein that is expressed at elevated levels early in meiosis. It functions as a meiotic activator required for both the IME1- and IME2-dependent pathways of meiotic gene …	-	-	-	-	GO:0000003, reproduction;GO:0000280, nuclear division;GO:0003674, molecular_function;GO:0003676, nucleic acid binding;GO:0003723, RNA binding;GO:0005488, binding;GO:0005575, cellular_component;GO:0005622, intracellular;GO:0005623, cell;GO:0005737, cytoplasm;GO:0006139, nucleobase-containing compound metabolic process;GO:0006259, DNA metabolic process;GO:0006260, DNA replication;GO:0006261, DNA-de…	-	-
TRINITY_DN10970_c0_g1	4.09401	0.98722	2.05207	2.36052e-06	2.48761e-05	up	-	-	-	-	-	-	-	-
TRINITY_DN10017_c0_g1	5.59989	13.465	-1.26574	0.00842206	0.0341016	down	-	-	-	-	-	-	-	-
TRINITY_DN10293_c0_g1	52.7493	13.3739	1.97974	6.32691e-07	7.4239e-06	up	sd00045, ANK, ankyrin repeats. Ankyrin repeats are one of the most abundant repeat motifs, and generally function as scaffolds for protein-protein interactions in processes including cell cycle, transcriptional regulation, signal transduction, vesicular trafficking, and inflammatory response. Although predominantly found in eukaryotic proteins, they are also found in some bacterial and viral prot…	pfam12796, Ank_2, Ankyrin repeats (3 copies). 3.21e-06	-	KOG4177, KOG4177, KOG4177, Ankyrin [Cell wall/membrane/envelope biogenesis]. 5.33e-36	sp|Q9ULJ7|ANR50_HUMAN Ankyrin repeat domain-containing protein 50 OS=Homo sapiens GN=ANKRD50 PE=1 SV=4 1.10e-50	-	-	-
TRINITY_DN13463_c0_g1	61.3136	724.766	-3.56324	1.18992e-09	2.06729e-08	down	-	-	-	-	-	-	-	-
TRINITY_DN13848_c2_g1	230.971	114.272	1.01524	0.000101871	0.000745707	up	-	-	-	-	sp|O74782|YGBA_SCHPO Universal stress protein A family protein C25B2.10 OS=Schizosaccharomyces pombe (strain 972 / ATCC 24843) GN=SPBC25B2.10 PE=1 SV=1 8.73e-35	GO:0003674, molecular_function;GO:0003824, catalytic activity;GO:0005575, cellular_component;GO:0005622, intracellular;GO:0005623, cell;GO:0005737, cytoplasm;GO:0005938, cell cortex;GO:0044424, intracellular part;GO:0044444, cytoplasmic part;GO:0044464, cell part;GO:0071944, cell periphery;GO:0099568, cytoplasmic region	-	-
TRINITY_DN9245_c0_g1	9.80058	38.7313	-1.98256	1.99716e-06	2.1365e-05	down	-	-	-	-	sp|O67071|Y928_AQUAE Uncharacterized protein aq_928 OS=Aquifex aeolicus (strain VF5) GN=aq_928 PE=3 SV=1 5.36e-26	-	XP_037036842.1 uncharacterized protein aq_928-like isoform X3 [Bradysia coprophila] 2.22e-107	-
TRINITY_DN13734_c1_g4	29.7458	13.4718	1.14274	9.36142e-05	0.000690906	up	sd00045, ANK, ankyrin repeats. Ankyrin repeats are one of the most abundant repeat motifs, and generally function as scaffolds for protein-protein interactions in processes including cell cycle, transcriptional regulation, signal transduction, vesicular trafficking, and inflammatory response. Although predominantly found in eukaryotic proteins, they are also found in some bacterial and viral prot…	pfam12796, Ank_2, Ankyrin repeats (3 copies). 4.06e-08	-	KOG4177, KOG4177, KOG4177, Ankyrin [Cell wall/membrane/envelope biogenesis]. 2.70e-12	sp|Q9ULJ7|ANR50_HUMAN Ankyrin repeat domain-containing protein 50 OS=Homo sapiens GN=ANKRD50 PE=1 SV=4 3.80e-06	-	KAI1694588.1 phosphorylase superfamily domain-containing protein [Ditylenchus destructor] 2.37e-27	-
TRINITY_DN14255_c2_g4	0.178387	1.90099	-3.41367	0.00547059	0.0240402	down	-	-	-	-	-	-	-	-
TRINITY_DN13713_c0_g1	32.4996	76.6094	-1.2371	0.00537094	0.0236719	down	cd19117, AKR_AKR3A1-2, AKR3A family of aldo-keto reductase (AKR). Saccharomyces cerevisiae Gcy1p and Ypr1p are founding members of aldo-keto reductase family 3 member A1 (AKR3A1) and A2 (AKR3A2), respectively. Gcy1p, also called galactose-inducible crystallin-like protein 1, is a glycerol dehydrogenase involved in glycerol catabolism under microaerobic conditions. It has mRNA binding activity. Yp…	pfam03055, RPE65, Retinal pigment epithelial membrane protein. This family represents a retinal pigment epithelial membrane receptor which is abundantly expressed in retinal pigment epithelium, and binds plasma retinal binding protein. The family also includes the sequence related neoxanthin cleavage enzyme in plants and lignostilbene-alpha,beta-dioxygenase in bacteria. 2.30e-25	K18097-ko00561 Glycerolipid metabolism	KOG1577, KOG1577, KOG1577, Aldo/keto reductase family proteins [General function prediction only]. 1.22e-71	sp|Q53353|LSDX1_SPHPI Lignostilbene-alpha,beta-dioxygenase isozyme I OS=Sphingomonas paucimobilis PE=1 SV=1 1.60e-83	-	XP_046808046.1 aldo-keto reductase family 1 member B1-like isoform X2 [Lucilia cuprina] >XP_046808048.1 aldo-keto reductase family 1 member B1-like isoform X2 [Lucilia cuprina] 2.20e-64	-
TRINITY_DN18386_c0_g1	0.290655	7.87017	-4.75902	3.35883e-12	7.9518e-11	down	-	-	-	-	-	-	-	-
TRINITY_DN13972_c0_g1	37.0495	129.01	-1.79996	6.34541e-06	6.20558e-05	down	cd00354, FBPase, Fructose-1,6-bisphosphatase, an enzyme that catalyzes the hydrolysis of fructose-1,6-biphosphate into fructose-6-phosphate and is critical in gluconeogenesis pathway. The alignment model also includes chloroplastic FBPases and sedoheptulose-1,7-biphosphatases that play a role in pentose phosphate pathway (Calvin cycle). 1.59e-94	pfam00316, FBPase, Fructose-1-6-bisphosphatase, N-terminal domain. This family represents the N-terminus of this protein family. 4.66e-53	K03841-ko00710 Carbon fixation in photosynthetic organisms;ko04152 AMPK signaling pathway;ko00680 Methane metabolism;ko00051 Fructose and mannose metabolism;ko01200 Carbon metabolism;ko00010 Glycolysis / Gluconeogenesis;ko04910 Insulin signaling pathway;ko00030 Pentose phosphate pathway	KOG1458, KOG1458, KOG1458, Fructose-1,6-bisphosphatase [Carbohydrate transport and metabolism]. 5.22e-111	sp|P09201|F16P_YEAST Fructose-1,6-bisphosphatase OS=Saccharomyces cerevisiae (strain ATCC 204508 / S288c) GN=FBP1 PE=1 SV=2 1.09e-123	GO:0000166, nucleotide binding;GO:0001558, regulation of cell growth;GO:0003674, molecular_function;GO:0003824, catalytic activity;GO:0005488, binding;GO:0005575, cellular_component;GO:0005622, intracellular;GO:0005623, cell;GO:0005737, cytoplasm;GO:0005829, cytosol;GO:0005975, carbohydrate metabolic process;GO:0005984, disaccharide metabolic process;GO:0005985, sucrose metabolic process;GO:00059…	XP_046401197.1 fructose-1,6-bisphosphatase 1 isoform X2 [Ischnura elegans] 5.42e-99	-
TRINITY_DN13972_c0_g2	4.8526	5786.53	-10.2197	4.5664e-70	8.77205e-67	down	-	-	-	-	-	-	-	-
TRINITY_DN9340_c0_g1	0.0231736	5.49432	-7.88932	1.93065e-08	2.84354e-07	down	-	-	-	-	-	-	-	-
TRINITY_DN9974_c0_g1	29.5069	2.45073	3.58977	9.7815e-18	3.93808e-16	up	-	-	-	-	-	-	-	-
TRINITY_DN12632_c0_g1	17.9913	2.57729	2.80337	2.97054e-18	1.24052e-16	up	-	pfam00743, FMO-like, Flavin-binding monooxygenase-like. This family includes FMO proteins, cyclohexanone mono-oxygenase and a number of different mono-oxygenases. 2.09e-10	-	KOG1238, KOG1238, KOG1238, Glucose dehydrogenase/choline dehydrogenase/mandelonitrile lyase (GMC oxidoreductase family) [General function prediction only]. 2.02e-44	sp|A4XPI5|BETA_PSEMY Oxygen-dependent choline dehydrogenase OS=Pseudomonas mendocina (strain ymp) GN=betA PE=3 SV=1 1.51e-47	-	XP_024085431.1 glucose dehydrogenase [FAD, quinone]-like isoform X2 [Cimex lectularius] 3.26e-38	-
TRINITY_DN14411_c0_g1	0.684708	7.0844	-3.37109	8.69982e-06	8.23849e-05	down	-	-	-	-	-	-	-	-
TRINITY_DN13929_c1_g1	8.08286	1.68459	2.26246	3.00446e-07	3.68622e-06	up	-	pfam04479, RTA1, RTA1 like protein. This family is comprised of fungal proteins with multiple transmembrane regions. RTA1 is involved in resistance to 7-aminocholesterol, while RTM1 confers resistance to an an unknown toxic chemical in molasses. These proteins may bind to the toxic substance, and thus prevent toxicity. They are not thought to be involved in the efflux of xenobiotics. 2.06e-30	-	-	sp|C8ZI10|RSB1_YEAS8 Sphingoid long-chain base transporter RSB1 OS=Saccharomyces cerevisiae (strain Lalvin EC1118 / Prise de mousse) GN=RSB1 PE=3 SV=1 1.21e-30	-	CAF1044396.1 unnamed protein product [Adineta ricciae] >CAF1296321.1 unnamed protein product [Adineta ricciae] 1.64e-43	-
TRINITY_DN14270_c0_g1	19.4381	96.7217	-2.31495	1.12994e-06	1.26303e-05	down	-	pfam02469, Fasciclin, Fasciclin domain. This extracellular domain is found repeated four times in grasshopper fasciclin I as well as in proteins from mammals, sea urchins, plants, yeast and bacteria. 2.48e-12	-	-	sp|D4B388|FLA_ARTBC Fasciclin-like arabinogalactan protein ARB_02922 OS=Arthroderma benhamiae (strain ATCC MYA-4681 / CBS 112371) GN=ARB_02922 PE=3 SV=1 3.02e-15	-	XP_027225409.1 transforming growth factor-beta-induced protein ig-h3-like isoform X1 [Penaeus vannamei] 2.26e-16	-
TRINITY_DN14270_c0_g3	41.954	7.34726	2.51353	4.84488e-11	1.00694e-09	up	-	-	-	-	-	-	-	-
TRINITY_DN14270_c0_g4	7.05039	30.8822	-2.131	4.73043e-08	6.59855e-07	down	-	pfam01872, RibD_C, RibD C-terminal domain. The function of this domain is not known, but it is thought to be involved in riboflavin biosynthesis. This domain is found in the C-terminus of RibD/RibG, in combination with pfam00383, as well as in isolation in some archaebacterial proteins. This family appears to be related to pfam00186. 2.56e-17	K14654-ko00740 Riboflavin metabolism	-	sp|Q6BII9|RIB7_DEBHA 2,5-diamino-6-ribosylamino-4(3H)-pyrimidinone 5'-phosphate reductase OS=Debaryomyces hansenii (strain ATCC 36239 / CBS 767 / JCM 1990 / NBRC 0083 / IGC 2968) GN=RIB7 PE=3 SV=1 2.80e-44	GO:0000166, nucleotide binding;GO:0001522, pseudouridine synthesis;GO:0003674, molecular_function;GO:0003824, catalytic activity;GO:0005488, binding;GO:0005515, protein binding;GO:0005575, cellular_component;GO:0005622, intracellular;GO:0005623, cell;GO:0005737, cytoplasm;GO:0005739, mitochondrion;GO:0006139, nucleobase-containing compound metabolic process;GO:0006396, RNA processing;GO:0006399, …	CAF0834746.1 unnamed protein product [Didymodactylos carnosus] >CAF3619496.1 unnamed protein product [Didymodactylos carnosus] 6.45e-39	-
TRINITY_DN14270_c0_g8	12073.3	1272.44	3.24615	2.38667e-13	6.41872e-12	up	cd17327, MFS_FEN2_like, Pantothenate transporter FEN2 and similar transporters of the Major Facilitator Superfamily. This family is composed of Saccharomyces cerevisiae pantothenate transporter FEN2 (or fenpropimorph resistance protein 2) and similar proteins from fungi and bacteria including fungal vitamin H transporter, allantoate permease, and high-affinity nicotinic acid transporter, as well …	pfam11913, DUF3431, Protein of unknown function (DUF3431). This family of proteins are functionally uncharacterized. This protein is found in eukaryotes. Proteins in this family are typically between 291 to 390 amino acids in length. This protein has a conserved NLRC sequence motif. 3.47e-30	-	KOG2533, KOG2533, KOG2533, Permease of the major facilitator superfamily [Carbohydrate transport and metabolism]. 4.53e-50	sp|C9SDH0|AIM24_VERA1 Altered inheritance of mitochondria protein 24, mitochondrial OS=Verticillium alfalfae (strain VaMs.102 / ATCC MYA-4576 / FGSC 10136) GN=AIM24 PE=3 SV=1 3.34e-145	-	CAF1383700.1 unnamed protein product [Adineta steineri] >CAF3964823.1 unnamed protein product [Adineta steineri] 3.06e-32	-
TRINITY_DN8870_c0_g1	0.982666	4.51374	-2.19955	0.000573317	0.00345558	down	cd16031, G6S_like, unchracterized sulfatase homologous to glucosamine (N-acetyl)-6-sulfatase(G6S, GNS). N-acetylglucosamine-6-sulfatase also known as glucosamine (N-acetyl)-6-sulfatase hydrolyzes of the 6-sulfate groups of the N-acetyl-D-glucosamine 6-sulfate units of heparan sulfate and keratan sulfate. Deficiency of N-acetylglucosamine-6-sulfatase results in the disease of Sanfilippo Syndrome t…	pfam00884, Sulfatase, Sulfatase. 4.47e-13	-	KOG3867, KOG3867, KOG3867, Sulfatase [General function prediction only]. 9.30e-30	sp|Q9C0V7|YHJ2_SCHPO Uncharacterized sulfatase PB10D8.02c OS=Schizosaccharomyces pombe (strain 972 / ATCC 24843) GN=SPBPB10D8.02c PE=3 SV=1 9.35e-37	-	EFX60385.1 hypothetical protein DAPPUDRAFT_344080, partial [Daphnia pulex] 1.38e-169	-
TRINITY_DN11639_c0_g1	42.0771	17.4351	1.27104	0.00259796	0.0128013	up	-	-	-	KOG3060, KOG3060, KOG3060, Uncharacterized conserved protein [Function unknown]. 5.64e-17	sp|O60110|OCA3_SCHPO TPR repeat protein oca3 OS=Schizosaccharomyces pombe (strain 972 / ATCC 24843) GN=oca3 PE=3 SV=3 1.47e-24	GO:0005575, cellular_component;GO:0005622, intracellular;GO:0005623, cell;GO:0005737, cytoplasm;GO:0005783, endoplasmic reticulum;GO:0005789, endoplasmic reticulum membrane;GO:0006457, protein folding;GO:0008150, biological_process;GO:0009987, cellular process;GO:0012505, endomembrane system;GO:0016020, membrane;GO:0016021, integral component of membrane;GO:0016043, cellular component organizatio…	XP_039299716.1 LOW QUALITY PROTEIN: TPR repeat protein oca3-like [Nilaparvata lugens] 3.78e-25	-
TRINITY_DN10992_c0_g1	8.48244	0.825122	3.3618	1.15701e-09	2.01794e-08	up	-	pfam05199, GMC_oxred_C, GMC oxidoreductase. This domain found associated with pfam00732. 3.89e-10	-	KOG1238, KOG1238, KOG1238, Glucose dehydrogenase/choline dehydrogenase/mandelonitrile lyase (GMC oxidoreductase family) [General function prediction only]. 1.27e-45	sp|Q6LGH5|BETA_PHOPR Oxygen-dependent choline dehydrogenase OS=Photobacterium profundum (strain SS9) GN=betA PE=3 SV=1 7.15e-50	-	XP_014284527.1 uncharacterized protein LOC106685981 isoform X2 [Halyomorpha halys] 4.13e-47	-
TRINITY_DN16022_c0_g1	0.333216	10.8969	-5.03132	3.62892e-11	7.66061e-10	down	-	-	-	-	-	-	-	-
TRINITY_DN7686_c0_g2	7.83475	0.641813	3.60966	2.85814e-09	4.69273e-08	up	-	pfam03291, Pox_MCEL, mRNA capping enzyme. This family of enzymes are related to pfam03919. 7.05e-06	-	-	sp|P44074|Y912_HAEIN Uncharacterized protein HI_0912 OS=Haemophilus influenzae (strain ATCC 51907 / DSM 11121 / KW20 / Rd) GN=HI_0912 PE=4 SV=1 1.51e-09	-	XP_003739109.1 uncharacterized protein LOC100899908 [Galendromus occidentalis] 3.69e-53	-
TRINITY_DN13929_c3_g4	5.25227	32.7468	-2.64034	6.22319e-05	0.000478737	down	-	-	-	-	-	-	-	-
TRINITY_DN10301_c0_g1	1.41097	9.37328	-2.73187	4.18062e-10	7.7115e-09	down	-	-	-	-	sp|Q4I0C5|RDR1_GIBZE Protein RDR1 OS=Gibberella zeae (strain PH-1 / ATCC MYA-4620 / FGSC 9075 / NRRL 31084) GN=RDR1 PE=3 SV=1 0.0	-	-	-
TRINITY_DN10045_c0_g1	0.213008	4.86613	-4.5138	4.88468e-10	8.96103e-09	down	cd20305, cupin_OxDC_C, Oxalate decarboxylase (OxDC), C-terminal cupin domain. This model represents the C-terminal cupin domain of oxalate decarboxylase (OxDC; EC 4.1.1.2), a manganese-dependent bicupin that catalyzes the conversion of oxalate to formate and carbon dioxide, utilizing dioxygen as a cofactor. It is evolutionarily related to oxalate oxidase (OxOx or germin; EC 1.2.3.4) which, in con…	pfam00190, Cupin_1, Cupin. This family represents the conserved barrel domain of the 'cupin' superfamily ('cupa' is the Latin term for a small barrel). This family contains 11S and 7S plant seed storage proteins, and germins. Plant seed storage proteins provide the major nitrogen source for the developing plant. 1.41e-07	-	-	sp|O34714|OXDC_BACSU Oxalate decarboxylase OxdC OS=Bacillus subtilis (strain 168) GN=oxdC PE=1 SV=1 9.52e-112	-	CAD7635339.1 unnamed protein product [Medioppia subpectinata] >CAG2115769.1 unnamed protein product [Medioppia subpectinata] 1.50e-91	-
TRINITY_DN14708_c0_g1	0.506272	5.70926	-3.49532	1.11764e-05	0.000103935	down	-	-	-	-	-	-	-	-
TRINITY_DN11993_c0_g1	26.4846	76.8638	-1.53715	0.000323396	0.00210591	down	-	-	-	KOG4754, KOG4754, KOG4754, Predicted phosphoglycerate mutase [Carbohydrate transport and metabolism]. 4.14e-14	sp|Q09676|YA03_SCHPO Probable phosphatase SPAC5H10.03 OS=Schizosaccharomyces pombe (strain 972 / ATCC 24843) GN=SPAC5H10.03 PE=3 SV=1 3.01e-16	GO:0003674, molecular_function;GO:0003824, catalytic activity	CAF4237300.1 unnamed protein product [Adineta steineri] 1.13e-10	-
TRINITY_DN12977_c0_g1	34.7915	14.8105	1.23211	0.00166	0.00873318	up	-	pfam07519, Tannase, Tannase and feruloyl esterase. This family includes fungal tannase and feruloyl esterase. It also includes several bacterial homologs of unknown function. 2.47e-65	-	-	sp|Q2UMX6|FAEB2_ASPOR Probable feruloyl esterase B-2 OS=Aspergillus oryzae (strain ATCC 42149 / RIB 40) GN=faeB-2 PE=3 SV=1 3.75e-79	-	XP_020807431.1 uncharacterized protein LOC110183487 [Drosophila serrata] >XP_020814795.1 uncharacterized protein LOC110189169 [Drosophila serrata] 4.86e-38	-
TRINITY_DN9570_c0_g1	3.27103	8.34848	-1.35177	0.00649773	0.0276416	down	cd18044, DEXXQc_SMUBP2, DEXXQ-box helicase domain of SMUBP2. SMUBP2 (also called immunoglobulin mu-binding protein 2, or IGHMBP2) is a 5' to 3' helicase that unwinds RNA and DNA duplexes in an ATP-dependent reaction. It is a DNA-binding protein specific to 5'-phosphorylated single-stranded guanine-rich sequence (5'-GGGCT-3') related to the immunoglobulin mu chain switch region. The IGHMBP2 gene i…	pfam13086, AAA_11, AAA domain. This family of domains contain a P-loop motif that is characteristic of the AAA superfamily. Many of the proteins in this family are conjugative transfer proteins. 3.23e-45	-	KOG1803, KOG1803, KOG1803, DNA helicase [Replication, recombination and repair]. 8.16e-148	sp|O94247|HCS1_SCHPO DNA polymerase alpha-associated DNA helicase A OS=Schizosaccharomyces pombe (strain 972 / ATCC 24843) GN=hcs1 PE=3 SV=1 1.77e-177	GO:0000228, nuclear chromosome;GO:0000278, mitotic cell cycle;GO:0003674, molecular_function;GO:0003678, DNA helicase activity;GO:0003824, catalytic activity;GO:0004003, ATP-dependent DNA helicase activity;GO:0004386, helicase activity;GO:0005575, cellular_component;GO:0005622, intracellular;GO:0005623, cell;GO:0005634, nucleus;GO:0005657, replication fork;GO:0005694, chromosome;GO:0005737, cytop…	XP_011432546.2 DNA-binding protein SMUBP-2 isoform X1 [Crassostrea gigas] >XP_011432547.2 DNA-binding protein SMUBP-2 isoform X2 [Crassostrea gigas] 3.83e-148	-
TRINITY_DN20836_c0_g1	0.0594907	6.71204	-6.81794	1.06954e-07	1.41278e-06	down	-	-	-	-	-	-	-	-
TRINITY_DN3305_c0_g1	0.106611	2.94716	-4.7889	0.000409594	0.00258219	down	-	pfam00909, Ammonium_transp, Ammonium Transporter Family. 4.69e-37	-	KOG0682, KOG0682, KOG0682, Ammonia permease [Inorganic ion transport and metabolism]. 1.29e-47	sp|Q9C0V1|AMT1_SCHPO Ammonium transporter 1 OS=Schizosaccharomyces pombe (strain 972 / ATCC 24843) GN=amt1 PE=3 SV=1 3.04e-56	-	XP_021955133.1 ammonium transporter 1 [Folsomia candida] >XP_035709814.1 ammonium transporter 1 [Folsomia candida] >OXA52020.1 Ammonium transporter 1 [Folsomia candida] 5.49e-71	-
TRINITY_DN12048_c0_g1	19.7834	129.878	-2.7148	9.96904e-11	1.98598e-09	down	-	-	-	-	-	-	-	-
TRINITY_DN7414_c0_g1	12.5063	6.20132	1.01201	0.008208	0.0334261	up	-	pfam06985, HET, Heterokaryon incompatibility protein (HET). This family represents a conserved region approximately 150 residues long within various heterokaryon incompatibility proteins that seem to be restricted to ascomycete fungi. Genetic differences in specific het genes prevent a viable heterokaryotic fungal cell from being formed by the fusion of filaments from two different wild-type stra…	-	-	-	-	KAI1693513.1 heterokaryon incompatibility protein (HET) domain-containing protein [Ditylenchus destructor] 3.40e-31	-
TRINITY_DN20849_c0_g1	18.9116	4.45936	2.08436	3.43145e-06	3.52504e-05	up	-	-	-	-	-	-	-	-
TRINITY_DN20807_c0_g1	61.3389	24.5614	1.32041	0.000126193	0.000905986	up	-	-	-	-	-	-	-	-
TRINITY_DN12376_c0_g1	1.88472	18.6415	-3.3061	5.98957e-16	2.05464e-14	down	-	pfam00561, Abhydrolase_1, alpha/beta hydrolase fold. This catalytic domain is found in a very wide range of enzymes. 1.18e-08	-	KOG2614, KOG2614, KOG2614, Kynurenine 3-monooxygenase and related flavoprotein monooxygenases [Energy production and conversion, General function prediction only]. 2.94e-16	sp|Q5EXK1|3HBH_KLEOX 3-hydroxybenzoate 6-hydroxylase OS=Klebsiella oxytoca GN=mhbM PE=1 SV=1 3.50e-18	-	CAF3976378.1 unnamed protein product [Adineta steineri] 3.13e-35	-
TRINITY_DN14177_c1_g3	9.29398	109.034	-3.55234	0.00200901	0.0102836	down	cd13934, RNase_H_Dikarya_like, Fungal (dikarya) Ribonuclease H, uncharacterized. This family contains dikarya RNase H, many of which are uncharacterized. Ribonuclease H (RNase H) enzymes are divided into two major families, Type 1 and Type 2, based on amino acid sequence similarities and biochemical properties. RNase H is an endonuclease that cleaves the RNA strand of an RNA/DNA hybrid in a seque…	pfam00075, RNase_H, RNase H. RNase H digests the RNA strand of an RNA/DNA hybrid. Important enzyme in retroviral replication cycle, and often found as a domain associated with reverse transcriptases. Structure is a mixed alpha+beta fold with three a/b/a layers. 3.01e-10	-	KOG3752, KOG3752, KOG3752, Ribonuclease H [Replication, recombination and repair]. 1.65e-09	sp|B2S2V0|RNH_TREPS Ribonuclease H OS=Treponema pallidum subsp. pallidum (strain SS14) GN=rnhA PE=3 SV=1 6.23e-13	-	KAF8363775.1 rnh-1.0, partial [Pristionchus pacificus] 1.58e-13	-
TRINITY_DN3946_c0_g1	3.36882	187.833	-5.80106	7.55235e-52	2.98695e-49	down	-	-	-	-	-	-	-	-
TRINITY_DN13881_c0_g1	5.26381	2.35515	1.16029	0.0069481	0.0291608	up	-	-	-	-	-	-	-	-
TRINITY_DN14163_c0_g1	26.4123	81.4426	-1.62457	1.15146e-05	0.000106931	down	-	-	-	-	-	-	-	-
TRINITY_DN11201_c0_g1	13.8248	179.743	-3.70061	3.99576e-24	2.76964e-22	down	-	-	-	-	-	-	-	-
TRINITY_DN14113_c1_g2	332.652	2499.94	-2.90981	6.11237e-06	6.00826e-05	down	cd10431, GHITM, Growth-hormone inducible transmembrane protein. GHITM appears to be ubiquitiously expressed in mammalian cells and expression has also been observed in various cancer cell lines. A cytoprotective function has been suggested. It is closely related to the BAX inhibitor (BI)-1 like family of small transmembrane proteins, which have been shown to have an antiapoptotic effect. 1.04e-31	pfam01625, PMSR, Peptide methionine sulfoxide reductase. This enzyme repairs damaged proteins. Methionine sulfoxide in proteins is reduced to methionine. 2.99e-36	-	KOG1635, KOG1635, KOG1635, Peptide methionine sulfoxide reductase [Posttranslational modification, protein turnover, chaperones]. 2.36e-37	sp|Q09859|MSRA_SCHPO Probable peptide methionine sulfoxide reductase OS=Schizosaccharomyces pombe (strain 972 / ATCC 24843) GN=mxr1 PE=3 SV=2 3.12e-40	-	KAJ3002303.1 hypothetical protein HDU68_006336 [Siphonaria sp. JEL0065] 7.39e-57	-
TRINITY_DN11563_c0_g1	5.32321	312.391	-5.87491	1.152e-61	8.60608e-59	down	cd05384, CAP_PRY1-like, CAP (cysteine-rich secretory proteins, antigen 5, and pathogenesis-related 1 proteins) domain of pathogen-related yeast 1 (PRY1) protein and similar fungal proteins. PRY1, also called pathogenesis-related protein 1, is a yeast protein that is up-regulated in core ESCRT mutants. It is a secreted protein required for efficient export of lipids such as acetylated sterols, and…	pfam00743, FMO-like, Flavin-binding monooxygenase-like. This family includes FMO proteins, cyclohexanone mono-oxygenase and a number of different mono-oxygenases. 1.49e-13	-	KOG3017, KOG3017, KOG3017, Defense-related protein containing SCP domain [Function unknown]. 3.47e-09	sp|A7HU16|BVMO_PARL1 Baeyer-Villiger monooxygenase OS=Parvibaculum lavamentivorans (strain DS-1 / DSM 13023 / NCIMB 13966) GN=Plav_1781 PE=1 SV=1 2.17e-131	-	KAE9551537.1 hypothetical protein FO519_005251 [Halicephalobus sp. NKZ332] 1.65e-125	-
TRINITY_DN18351_c0_g1	0.0332546	1.17018	-5.13704	0.00837391	0.0339475	down	-	-	K00108-ko00260 Glycine, serine and threonine metabolism	-	-	-	CAF1378201.1 unnamed protein product, partial [Didymodactylos carnosus] >CAF4270711.1 unnamed protein product, partial [Didymodactylos carnosus] 1.61e-08	-
TRINITY_DN13114_c0_g2	107	50.9392	1.07076	0.000585638	0.00352352	up	cd06548, GH18_chitinase, The GH18 (glycosyl hydrolases, family 18) type II chitinases hydrolyze chitin, an abundant polymer of N-acetylglucosamine and have been identified in bacteria, fungi, insects, plants, viruses, and protozoan parasites. The structure of this domain is an eight-stranded alpha/beta barrel with a pronounced active-site cleft at the C-terminal end of the beta-barrel. 3.92e-10	pfam00704, Glyco_hydro_18, Glycosyl hydrolases family 18. 4.93e-10	-	-	-	-	CAD7647220.1 unnamed protein product [Oppiella nova] >CAG2166621.1 unnamed protein product [Oppiella nova] 5.58e-09	-
TRINITY_DN14178_c0_g1	55.3022	163.431	-1.56328	0.00700299	0.0293362	down	-	pfam12349, Sterol-sensing, Sterol-sensing domain of SREBP cleavage-activation. Sterol regulatory element-binding proteins (SREBPs) are membrane-bound transcription factors that promote lipid synthesis in animal cells. They are embedded in the membranes of the endoplasmic reticulum (ER) in a helical hairpin orientation and are released from the ER by a two-step proteolytic process. Proteolysis beg…	-	-	sp|O43043|SCAP_SCHPO Sterol regulatory element-binding protein cleavage-activating protein OS=Schizosaccharomyces pombe (strain 972 / ATCC 24843) GN=scp1 PE=1 SV=1 2.29e-26	GO:0000139, Golgi membrane;GO:0003674, molecular_function;GO:0005488, binding;GO:0005496, steroid binding;GO:0005575, cellular_component;GO:0005622, intracellular;GO:0005623, cell;GO:0005737, cytoplasm;GO:0005783, endoplasmic reticulum;GO:0005789, endoplasmic reticulum membrane;GO:0005794, Golgi apparatus;GO:0006355, regulation of transcription, DNA-templated;GO:0006357, regulation of transcripti…	NXQ67172.1 SCAP protein [Quiscalus mexicanus] 4.38e-20	-
TRINITY_DN13927_c3_g2	3217.01	574.586	2.48512	3.77504e-13	1.00124e-11	up	-	-	-	-	-	-	-	-
TRINITY_DN13927_c3_g1	37.7521	147.829	-1.9693	5.36983e-08	7.43647e-07	down	cd02182, GH16_Strep_laminarinase_like, Streptomyces laminarinase-like, member of glycosyl hydrolase family 16. Proteins similar to Streptomyces sioyaensis beta-1,3-glucanase (laminarinase) present in Actinomycetales as well as Peziomycotina. Laminarinases belong to glycosyl hydrolase family 16 and hydrolyze the glycosidic bond of the 1,3-beta-linked glucan, a major component of fungal and plant c…	-	-	-	sp|P23903|E13B_BACCI Glucan endo-1,3-beta-glucosidase A1 OS=Bacillus circulans GN=glcA PE=1 SV=1 3.76e-13	-	XP_037035063.1 beta-glucanase-like [Bradysia coprophila] 5.59e-24	-
TRINITY_DN12093_c0_g1	2.23013	70.8116	-4.98879	3.89692e-22	2.29833e-20	down	cd05374, 17beta-HSD-like_SDR_c, 17beta hydroxysteroid dehydrogenase-like, classical (c) SDRs. 17beta-hydroxysteroid dehydrogenases are a group of isozymes that catalyze activation and inactivation of estrogen and androgens. SDRs are a functionally diverse family of oxidoreductases that have a single domain with a structurally conserved Rossmann fold (alpha/beta folding pattern with a central beta…	pfam00106, adh_short, short chain dehydrogenase. This family contains a wide variety of dehydrogenases. 3.14e-21	-	KOG1205, KOG1205, KOG1205, Predicted dehydrogenase [Secondary metabolites biosynthesis, transport and catabolism]. 1.82e-27	sp|O74628|YQ53_SCHPO Uncharacterized oxidoreductase C162.03 OS=Schizosaccharomyces pombe (strain 972 / ATCC 24843) GN=SPCC162.03 PE=3 SV=1 1.18e-50	-	KAG4069203.1 hypothetical protein HA402_012056 [Bradysia odoriphaga] 5.64e-40	-
TRINITY_DN14313_c1_g3	131.779	427.268	-1.69703	0.00224395	0.0113097	down	cd02086, P-type_ATPase_Na_ENA, fungal-type Na(+)-ATPase, similar to the plasma membrane sodium transporters Saccharomyces cerevisiae Ena1p, Ena2p and Ustilago maydis Ena1, and the endoplasmic reticulum sodium transporter Ustilago maydis Ena2. Fungal-type Na(+)-ATPase (also called ENA ATPases). This subfamily includes the Saccharomyces cerevisiae plasma membrane transporters: Na(+)/Li(+)-exporting…	pfam00083, Sugar_tr, Sugar (and other) transporter. 8.49e-94	-	KOG0202, KOG0202, KOG0202, Ca2+ transporting ATPase [Inorganic ion transport and metabolism]. 3.61e-141	sp|P22189|ATC3_SCHPO Calcium-transporting ATPase 3 OS=Schizosaccharomyces pombe (strain 972 / ATCC 24843) GN=cta3 PE=1 SV=1 0.0	GO:0000322, storage vacuole;GO:0000323, lytic vacuole;GO:0000324, fungal-type vacuole;GO:0003674, molecular_function;GO:0003824, catalytic activity;GO:0005215, transporter activity;GO:0005388, calcium-transporting ATPase activity;GO:0005575, cellular_component;GO:0005622, intracellular;GO:0005623, cell;GO:0005737, cytoplasm;GO:0005739, mitochondrion;GO:0005773, vacuole;GO:0005886, plasma membrane…	XP_049849929.1 uncharacterized protein LOC126320473 isoform X2 [Schistocerca gregaria] >XP_049849930.1 uncharacterized protein LOC126320473 isoform X2 [Schistocerca gregaria] 1.87e-141	-
TRINITY_DN9380_c0_g1	55.2366	6.89702	3.00158	9.00599e-15	2.82293e-13	up	cd06186, NOX_Duox_like_FAD_NADP, NADPH oxidase (NOX) catalyzes the generation of reactive oxygen species (ROS) such as superoxide and hydrogen peroxide. ROS were originally identified as bactericidal agents in phagocytes, but are now also implicated in cell signaling and metabolism. NOX has a 6-alpha helix heme-binding transmembrane domain fused to a flavoprotein with the nucleotide binding domai…	pfam01794, Ferric_reduct, Ferric reductase like transmembrane component. This family includes a common region in the transmembrane proteins mammalian cytochrome B-245 heavy chain (gp91-phox), ferric reductase transmembrane component in yeast and respiratory burst oxidase from mouse-ear cress. This may be a family of flavocytochromes capable of moving electrons across the plasma membrane. The Frp1…	-	KOG0039, KOG0039, KOG0039, Ferric reductase, NADH/NADPH oxidase and related proteins [Inorganic ion transport and metabolism, Secondary metabolites biosynthesis, transport and catabolism]. 4.95e-08	sp|Q12333|FRE7_YEAST Ferric/cupric reductase transmembrane component 7 OS=Saccharomyces cerevisiae (strain ATCC 204508 / S288c) GN=FRE7 PE=1 SV=2 7.10e-19	-	KAJ3026649.1 hypothetical protein HDU68_005284, partial [Siphonaria sp. JEL0065] 1.22e-06	-
TRINITY_DN10183_c0_g1	1.15344	13.9365	-3.59485	4.03515e-12	9.45309e-11	down	cd17352, MFS_MCT_SLC16, Monocarboxylate transporter (MCT) family of the Major Facilitator Superfamily of transporters. The animal Monocarboxylate transporter (MCT) family is also called Solute carrier family 16 (SLC16 or SLC16A). It is composed of 14 members, MCT1-14. MCTs play an integral role in cellular metabolism via lactate transport and have been implicated in metabolic synergy in tumors. M…	-	-	KOG2504, KOG2504, KOG2504, Monocarboxylate transporter [Carbohydrate transport and metabolism]. 1.30e-14	sp|Q08777|MCH5_YEAST Riboflavin transporter MCH5 OS=Saccharomyces cerevisiae (strain ATCC 204508 / S288c) GN=MCH5 PE=1 SV=2 2.40e-35	-	KAJ3027069.1 hypothetical protein HDU68_004552 [Siphonaria sp. JEL0065] 1.33e-35	-
TRINITY_DN9312_c0_g1	61.8768	17.637	1.81079	6.49186e-05	0.000497697	up	cd06178, MFS_unc93-like, Uncharacterized Unc-93-like proteins of the Major Facilitator Superfamily of transporters. This subfamily consists of uncharacterized proteins, mainly from fungi and plants, with similarity to Caenorhabditis elegans uncoordinated protein 93 (also called putative potassium channel regulatory protein unc-93). Unc-93 acts as a regulatory subunit of a multi-subunit potassium …	-	-	-	sp|Q8LG53|UN932_ARATH UNC93-like protein 2 OS=Arabidopsis thaliana GN=At1g18010 PE=2 SV=2 2.13e-39	-	KAJ3012667.1 hypothetical protein HDU68_001081 [Siphonaria sp. JEL0065] 2.55e-21	-
TRINITY_DN1554_c0_g1	0.0628686	2.40494	-5.25752	1.44902e-05	0.000131833	down	-	-	K00231-ko00860 Porphyrin and chlorophyll metabolism	KOG1276, KOG1276, KOG1276, Protoporphyrinogen oxidase [Coenzyme transport and metabolism]. 2.71e-18	sp|Q10062|PPOX_SCHPO Protoporphyrinogen oxidase OS=Schizosaccharomyces pombe (strain 972 / ATCC 24843) GN=hem14 PE=3 SV=1 3.52e-22	GO:0003674, molecular_function;GO:0003824, catalytic activity;GO:0004729, oxygen-dependent protoporphyrinogen oxidase activity;GO:0005575, cellular_component;GO:0005622, intracellular;GO:0005623, cell;GO:0005737, cytoplasm;GO:0005739, mitochondrion;GO:0005740, mitochondrial envelope;GO:0005743, mitochondrial inner membrane;GO:0006725, cellular aromatic compound metabolic process;GO:0006778, porph…	KAJ3023505.1 oxygen-dependent protoporphyrinogen oxidase [Siphonaria sp. JEL0065] 6.77e-27	-
TRINITY_DN10523_c0_g1	0.481175	98.2412	-7.67362	4.7465e-13	1.24661e-11	down	-	-	-	-	-	-	-	-
TRINITY_DN7934_c0_g2	0.271221	8.44716	-4.96093	0.00071186	0.00420025	down	-	-	-	-	-	-	-	-
TRINITY_DN10035_c0_g1	8.11557	263.661	-5.02185	1.19051e-45	3.13897e-43	down	cd05283, CAD1, Cinnamyl alcohol dehydrogenases (CAD). Cinnamyl alcohol dehydrogenases (CAD), members of the medium chain dehydrogenase/reductase family, reduce cinnamaldehydes to cinnamyl alcohols in the last step of monolignal metabolism in plant cells walls. CAD binds 2 zinc ions and is NADPH- dependent. CAD family members are also found in non-plant species, e.g. in yeast where they have an al…	pfam01532, Glyco_hydro_47, Glycosyl hydrolase family 47. Members of this family are alpha-mannosidases that catalyze the hydrolysis of the terminal 1,2-linked alpha-D-mannose residues in the oligo-mannose oligosaccharide Man(9)(GlcNAc)(2). 8.30e-123	K01230-ko00510 N-Glycan biosynthesis;ko04141 Protein processing in endoplasmic reticulum;ko00513 Various types of N-glycan biosynthesis	KOG0023, KOG0023, KOG0023, Alcohol dehydrogenase, class V [Secondary metabolites biosynthesis, transport and catabolism]. 1.00e-65	sp|Q04894|ADH6_YEAST NADP-dependent alcohol dehydrogenase 6 OS=Saccharomyces cerevisiae (strain ATCC 204508 / S288c) GN=ADH6 PE=1 SV=1 7.86e-87	-	XP_023687302.1 endoplasmic reticulum mannosyl-oligosaccharide 1,2-alpha-mannosidase-like isoform X2 [Paramormyrops kingsleyae] 8.55e-67	-
TRINITY_DN12732_c0_g1	8.71508	3.88212	1.16667	0.000497076	0.00305353	up	-	-	-	-	-	-	-	-
TRINITY_DN14282_c0_g2	39.6018	123.734	-1.6436	0.000253147	0.00169105	down	-	pfam16335, DUF4965, Domain of unknown function (DUF4965). This family consists of uncharacterized proteins around 840 residues in length and is mainly found in various Bacteroides species. Several proteins in this family are annotated as Glutaminases, but the function of this protein is unknown. 4.25e-53	-	-	sp|Q2U4L7|GTAA_ASPOR Glutaminase A OS=Aspergillus oryzae (strain ATCC 42149 / RIB 40) GN=gtaA PE=1 SV=2 0.0	GO:0003674, molecular_function;GO:0005198, structural molecule activity;GO:0005200, structural constituent of cytoskeleton;GO:0005488, binding;GO:0005515, protein binding;GO:0005575, cellular_component;GO:0005622, intracellular;GO:0005623, cell;GO:0005737, cytoplasm;GO:0005739, mitochondrion;GO:0005783, endoplasmic reticulum;GO:0005856, cytoskeleton;GO:0005874, microtubule;GO:0006996, organelle o…	CAD7622544.1 unnamed protein product [Medioppia subpectinata] >CAG2102974.1 unnamed protein product [Medioppia subpectinata] 2.33e-89	-
TRINITY_DN9815_c0_g1	1.22721	7.52876	-2.61703	8.30616e-08	1.11365e-06	down	-	pfam03441, FAD_binding_7, FAD binding domain of DNA photolyase. 2.44e-39	K02295-ko04710 Circadian rhythm	KOG0133, KOG0133, KOG0133, Deoxyribodipyrimidine photolyase/cryptochrome [Replication, recombination and repair, Signal transduction mechanisms]. 1.97e-69	sp|P97784|CRY1_MOUSE Cryptochrome-1 OS=Mus musculus GN=Cry1 PE=1 SV=1 5.98e-100	-	XP_009045182.1 hypothetical protein LOTGIDRAFT_180057 [Lottia gigantea] >ESP04097.1 hypothetical protein LOTGIDRAFT_180057 [Lottia gigantea] 1.40e-112	-
TRINITY_DN23244_c0_g1	3.36059	14.301	-2.08933	0.000923075	0.00526087	down	-	-	-	-	sp|P40586|YIW2_YEAST Uncharacterized protein YIR042C OS=Saccharomyces cerevisiae (strain ATCC 204508 / S288c) GN=YIR042C PE=3 SV=1 6.97e-58	-	CAF0838288.1 unnamed protein product [Didymodactylos carnosus] >CAF3625567.1 unnamed protein product [Didymodactylos carnosus] 3.54e-60	-
TRINITY_DN14113_c3_g3	0.94507	15.6548	-4.05004	2.23626e-07	2.80775e-06	down	-	-	-	-	-	-	-	-
TRINITY_DN14113_c3_g4	1731.47	738.015	1.23027	8.97906e-06	8.49096e-05	up	cd07948, DRE_TIM_HCS, Saccharomyces cerevisiae homocitrate synthase and related proteins, catalytic TIM barrel domain. Homocitrate synthase (HCS) catalyzes the condensation of acetyl-CoA and alpha-ketoglutarate to form homocitrate, the first step in the lysine biosynthesis pathway. This family includes the Yarrowia lipolytica LYS1 protein as well as the Saccharomyces cerevisiae LYS20 and LYS21 pr…	-	K01655-ko00620 Pyruvate metabolism;ko01230 Biosynthesis of amino acids;ko00300 Lysine biosynthesis;ko01210 2-Oxocarboxylic acid metabolism	KOG2367, KOG2367, KOG2367, Alpha-isopropylmalate synthase/homocitrate synthase [Amino acid transport and metabolism]. 7.95e-29	sp|Q12122|HOSM_YEAST Homocitrate synthase, mitochondrial OS=Saccharomyces cerevisiae (strain ATCC 204508 / S288c) GN=LYS21 PE=1 SV=1 4.66e-70	GO:0001207, histone displacement;GO:0003674, molecular_function;GO:0003824, catalytic activity;GO:0004410, homocitrate synthase activity;GO:0005575, cellular_component;GO:0005622, intracellular;GO:0005623, cell;GO:0005634, nucleus;GO:0005737, cytoplasm;GO:0005739, mitochondrion;GO:0006082, organic acid metabolic process;GO:0006139, nucleobase-containing compound metabolic process;GO:0006259, DNA …	AQT27085.1 putative homocitrate synthase [Nilaparvata lugens] 2.82e-66	-
TRINITY_DN8668_c0_g1	6.52011	2.66405	1.29128	0.00192988	0.00991508	up	cd05674, M20_yscS, M20 Peptidase, carboxypeptidase yscS. Peptidase M20 family, yscS (GlyX-carboxypeptidase, CPS1, carboxypeptidase S, carboxypeptidase a, carboxypeptidase yscS, glycine carboxypeptidase)-like subfamily. This group mostly contains proteins that have been uncharacterized to date, but also includes vacuolar proteins involved in nitrogen metabolism which are essential for use of certa…	-	-	KOG2275, KOG2275, KOG2275, Aminoacylase ACY1 and related metalloexopeptidases [Amino acid transport and metabolism]. 4.69e-10	sp|P27614|CBPS_YEAST Carboxypeptidase S OS=Saccharomyces cerevisiae (strain ATCC 204508 / S288c) GN=CPS1 PE=1 SV=2 2.03e-95	GO:0000322, storage vacuole;GO:0000323, lytic vacuole;GO:0000324, fungal-type vacuole;GO:0000328, fungal-type vacuole lumen;GO:0003674, molecular_function;GO:0003824, catalytic activity;GO:0004180, carboxypeptidase activity;GO:0005575, cellular_component;GO:0005622, intracellular;GO:0005623, cell;GO:0005737, cytoplasm;GO:0005773, vacuole;GO:0005775, vacuolar lumen;GO:0006508, proteolysis;GO:00068…	KAJ3025897.1 hypothetical protein HDU68_006518 [Siphonaria sp. JEL0065] 7.98e-85	-
TRINITY_DN9778_c0_g1	2.27727	0.101694	4.48501	0.000145872	0.00102968	up	cd07216, Pat17_PNPLA8_PNPLA9_like3, Patatin-like phospholipase. Patatin is a storage protein of the potato tuber that shows Phospholipase A2 activity (PLA2; EC 3.1.1.4). Patatin catalyzes the nonspecific hydrolysis of phospholipids, glycolipids, sulfolipids, and mono- and diacylglycerols, thereby showing lipid acyl hydrolase activity. The active site includes an oxyanion hole with a conserved GGx…	-	-	KOG4231, KOG4231, KOG4231, Intracellular membrane-bound Ca2+-independent phospholipase A2 [Lipid transport and metabolism]. 1.63e-06	-	-	-	-
TRINITY_DN11152_c0_g1	140.595	14.8877	3.23935	1.75147e-20	8.7554e-19	up	cd11307, M35_Asp_f2_like, Peptidase M35 domain of Asp f2, a major allergen from Aspergillus fumigatus, and related proteins; non catalytic. In this domain subgroup the unique zinc-binding motif (the aspzincin motif, characteristic of the M35 deuterolysin family, and defined as the "HEXXH + D" motif: two His ligands and Asp as third ligand), is poorly conserved and may not bind Zinc. Members of th…	pfam13933, HRXXH, Putative peptidase family. This family of putative peptidases are closely related to the M35 family pfam02102. In this family the metal binding HEXXH motif is replaced with HRXXH. The exact function of these proteins is unknown. Members of this family are found to be fungal allergens. 1.84e-68	K07204-ko04151 PI3K-Akt signaling pathway;ko04211 Longevity regulating pathway - mammal;ko04150 mTOR signaling pathway;ko04213 Longevity regulating pathway - multiple species;ko04152 AMPK signaling pathway;ko04910 Insulin signaling pathway	KOG1517, KOG1517, KOG1517, Guanine nucleotide binding protein MIP1 [Cell cycle control, cell division, chromosome partitioning]. 0.0	sp|P87141|MIP1_SCHPO Target of rapamycin complex 1 subunit mip1 OS=Schizosaccharomyces pombe (strain 972 / ATCC 24843) GN=mip1 PE=1 SV=1 0.0	GO:0000322, storage vacuole;GO:0000323, lytic vacuole;GO:0000324, fungal-type vacuole;GO:0000329, fungal-type vacuole membrane;GO:0001101, response to acid chemical;GO:0001558, regulation of cell growth;GO:0001932, regulation of protein phosphorylation;GO:0001934, positive regulation of protein phosphorylation;GO:0003674, molecular_function;GO:0005488, binding;GO:0005515, protein binding;GO:00055…	CAH1793909.1 unnamed protein product [Owenia fusiformis] 0.0	-
TRINITY_DN10914_c0_g1	2.28496	0.433984	2.39645	0.0050902	0.0226396	up	-	pfam13921, Myb_DNA-bind_6, Myb-like DNA-binding domain. This family contains the DNA binding domains from Myb proteins, as well as the SANT domain family. 7.31e-11	-	KOG0049, KOG0049, KOG0049, Transcription factor, Myb superfamily [Transcription]. 5.14e-09	sp|Q08759|MYB_XENLA Transcriptional activator Myb OS=Xenopus laevis GN=myb PE=2 SV=1 4.22e-08	-	XP_029503217.1 myb-related protein B-like [Oncorhynchus nerka] 3.01e-10	-
TRINITY_DN7825_c0_g1	0.273345	4.2802	-3.96888	1.44642e-08	2.17076e-07	down	cd11041, CYP503A1-like, cytochrome P450 family 503, subfamily A, polypeptide 1 and similar cytochrome P450s. This family is composed of predominantly fungal cytochrome P450s (CYPs) with similarity to Fusarium fujikuroi Cytochrome P450 503A1 (CYP503A1, also called ent-kaurene oxidase or cytochrome P450-4), Aspergillus nidulans austinol synthesis protein I (ausI), Alternaria alternata tentoxin synt…	pfam00067, p450, Cytochrome P450. Cytochrome P450s are haem-thiolate proteins involved in the oxidative degradation of various compounds. They are particularly well known for their role in the degradation of environmental toxins and mutagens. They can be divided into 4 classes, according to the method by which electrons from NAD(P)H are delivered to the catalytic site. Sequence conservation is re…	-	KOG0158, KOG0158, KOG0158, Cytochrome P450 CYP3/CYP5/CYP6/CYP9 subfamilies [Secondary metabolites biosynthesis, transport and catabolism]. 1.99e-22	sp|Q9C449|PAXP_PENPX Cytochrome P450 monooxygenase paxP OS=Penicillium paxilli GN=paxP PE=1 SV=1 1.22e-70	-	XP_014227659.1 probable cytochrome P450 49a1 [Trichogramma pretiosum] 1.55e-16	-
TRINITY_DN7435_c0_g1	10.6304	226.147	-4.411	9.82113e-17	3.62815e-15	down	-	-	-	-	-	-	-	-
TRINITY_DN7996_c0_g1	0.465969	3.07338	-2.72152	0.00181386	0.00941372	down	-	-	-	-	-	-	-	-
TRINITY_DN9532_c0_g1	1.09281	19.3244	-4.14431	1.01627e-13	2.86494e-12	down	cd08934, CAD_SDR_c, clavulanic acid dehydrogenase (CAD), classical (c) SDR. CAD catalyzes the NADP-dependent reduction of clavulanate-9-aldehyde to clavulanic acid, a beta-lactamase inhibitor. SDRs are a functionally diverse family of oxidoreductases that have a single domain with a structurally conserved Rossmann fold (alpha/beta folding pattern with a central beta-sheet), an NAD(P)(H)-binding r…	pfam00106, adh_short, short chain dehydrogenase. This family contains a wide variety of dehydrogenases. 4.26e-21	-	KOG1205, KOG1205, KOG1205, Predicted dehydrogenase [Secondary metabolites biosynthesis, transport and catabolism]. 1.54e-17	sp|A0A097ZPE8|ANDI_EMEVA Short chain dehydrogenase andI OS=Emericella variicolor GN=andI PE=1 SV=1 3.20e-09	-	CAF0757887.1 unnamed protein product [Adineta steineri] >CAF0793179.1 unnamed protein product [Adineta steineri] 4.34e-41	-
TRINITY_DN14003_c2_g2	134.79	365.902	-1.44074	0.0012955	0.00704145	down	-	-	K00384-ko00450 Selenocompound metabolism;ko00240 Pyrimidine metabolism	KOG0404, KOG0404, KOG0404, Thioredoxin reductase [Posttranslational modification, protein turnover, chaperones]. 1.67e-126	sp|P51978|TRXB_NEUCR Thioredoxin reductase OS=Neurospora crassa (strain ATCC 24698 / 74-OR23-1A / CBS 708.71 / DSM 1257 / FGSC 987) GN=cys-9 PE=3 SV=1 0.0	GO:0000302, response to reactive oxygen species;GO:0000303, response to superoxide;GO:0000305, response to oxygen radical;GO:0003674, molecular_function;GO:0003824, catalytic activity;GO:0004791, thioredoxin-disulfide reductase activity;GO:0005488, binding;GO:0005506, iron ion binding;GO:0005575, cellular_component;GO:0005622, intracellular;GO:0005623, cell;GO:0005737, cytoplasm;GO:0005739, mitoc…	KAJ3002618.1 thioredoxin-disulfide reductase [Siphonaria sp. JEL0065] 1.14e-119	-
TRINITY_DN14193_c1_g12	0.971226	3.23116	-1.73417	0.00612828	0.0263449	down	-	pfam13424, TPR_12, Tetratricopeptide repeat. 1.72e-06	-	KOG1840, KOG1840, KOG1840, Kinesin light chain [Cytoskeleton]. 7.78e-15	sp|P46824|KLC_DROME Kinesin light chain OS=Drosophila melanogaster GN=Klc PE=1 SV=1 2.32e-17	-	RMX54152.1 hypothetical protein pdam_00012120, partial [Pocillopora damicornis] 9.56e-19	-
TRINITY_DN11071_c0_g1	6.68309	22.8215	-1.77181	1.62344e-05	0.000145633	down	cd01821, Rhamnogalacturan_acetylesterase_like, Rhamnogalacturan_acetylesterase_like subgroup of SGNH-hydrolases. Rhamnogalacturan acetylesterase removes acetyl esters from rhamnogalacturonan substrates, and renders them susceptible to degradation by rhamnogalacturonases. Rhamnogalacturonans are highly branched regions in pectic polysaccharides, consisting of repeating -(1,2)-L-Rha-(1,4)-D-GalUA d…	pfam08022, FAD_binding_8, FAD-binding domain. 1.08e-09	K13411-ko04624 Toll and Imd signaling pathway;ko04013 MAPK signaling pathway - fly	KOG0039, KOG0039, KOG0039, Ferric reductase, NADH/NADPH oxidase and related proteins [Inorganic ion transport and metabolism, Secondary metabolites biosynthesis, transport and catabolism]. 1.05e-34	sp|Q948U0|RBOHA_SOLTU Respiratory burst oxidase homolog protein A OS=Solanum tuberosum GN=RBOHA PE=1 SV=1 7.11e-38	-	XP_049761769.1 NADPH oxidase 5 isoform X2 [Elephas maximus indicus] 6.04e-37	-
TRINITY_DN23997_c0_g1	12.8394	5.35005	1.26295	0.00221981	0.0112049	up	-	pfam01699, Na_Ca_ex, Sodium/calcium exchanger protein. This is a family of sodium/calcium exchanger integral membrane proteins. This family covers the integral membrane regions of the proteins. Sodium/calcium exchangers regulate intracellular Ca2+ concentrations in many cells; cardiac myocytes, epithelial cells, neurons retinal rod photoreceptors and smooth muscle cells. Ca2+ is moved into or out…	-	KOG1307, KOG1307, KOG1307, K+-dependent Ca2+/Na+ exchanger NCKX1 and related proteins [Inorganic ion transport and metabolism, Signal transduction mechanisms]. 2.15e-06	sp|Q8C261|NCKX5_MOUSE Sodium/potassium/calcium exchanger 5 OS=Mus musculus GN=Slc24a5 PE=2 SV=1 2.13e-08	-	XP_052258192.1 sodium/potassium/calcium exchanger 3-like [Dreissena polymorpha] >KAH3894596.1 hypothetical protein DPMN_018753 [Dreissena polymorpha] 1.26e-09	-
TRINITY_DN8243_c0_g1	5.98404	19.2078	-1.6825	0.000325228	0.00211682	down	cd01171, YXKO-related, B.subtilis YXKO protein of unknown function and related proteins. Based on the conservation of the ATP binding site, the substrate binding site and the Mg2+binding site and structural homology this group is a member of the ribokinase-like superfamily. 3.22e-26	pfam01256, Carb_kinase, Carbohydrate kinase. This family is related to pfam02110 and pfam00294 implying that it also is a carbohydrate kinase. (personal obs Yeats C). 1.38e-20	-	KOG3974, KOG3974, KOG3974, Predicted sugar kinase [Carbohydrate transport and metabolism]. 2.37e-78	sp|C7YKN8|NNRD_NECH7 ATP-dependent (S)-NAD(P)H-hydrate dehydratase OS=Nectria haematococca (strain 77-13-4 / ATCC MYA-4622 / FGSC 9596 / MPVI) GN=NECHADRAFT_98759 PE=3 SV=1 2.64e-171	GO:0003674, molecular_function;GO:0003824, catalytic activity;GO:0005575, cellular_component;GO:0005622, intracellular;GO:0005623, cell;GO:0005737, cytoplasm;GO:0006139, nucleobase-containing compound metabolic process;GO:0006725, cellular aromatic compound metabolic process;GO:0006732, coenzyme metabolic process;GO:0006733, oxidoreduction coenzyme metabolic process;GO:0006753, nucleoside phospha…	XP_035680963.1 ATP-dependent (S)-NAD(P)H-hydrate dehydratase-like [Branchiostoma floridae] 4.18e-76	-
TRINITY_DN10295_c0_g1	0.0447783	6.78828	-7.2441	0.00073657	0.00432476	down	cd17356, MFS_HXT, Fungal Hexose transporter subfamily of the Major Facilitator Superfamily of transporters and similar proteins. The fungal hexose transporter (HXT) subfamily is comprised of functionally redundant proteins that function mainly in the transport of glucose, as well as other sugars such as galactose and fructose. Saccharomyces cerevisiae has 20 genes that encode proteins in this fam…	pfam00083, Sugar_tr, Sugar (and other) transporter. 9.35e-16	-	KOG0254, KOG0254, KOG0254, Predicted transporter (major facilitator superfamily) [General function prediction only]. 5.98e-23	sp|P49374|HGT1_KLULA High-affinity glucose transporter OS=Kluyveromyces lactis (strain ATCC 8585 / CBS 2359 / DSM 70799 / NBRC 1267 / NRRL Y-1140 / WM37) GN=HGT1 PE=3 SV=1 4.39e-53	-	CAF2604039.1 unnamed protein product [Rotaria sp. Silwood2] >CAF2764210.1 unnamed protein product [Rotaria sp. Silwood2] >CAF2970899.1 unnamed protein product [Rotaria sp. Silwood2] >CAF3942569.1 unnamed protein product [Rotaria sp. Silwood2] >CAF4169005.1 unnamed protein product [Rotaria sp. Silwood2] 1.80e-29	-
TRINITY_DN13235_c0_g1	1.72712	7.89707	-2.19295	0.00167256	0.00879241	down	-	-	-	-	-	-	-	-
TRINITY_DN6625_c0_g1	0.620818	2.49036	-2.00411	0.00449008	0.0203774	down	cd02253, DmpA, L-Aminopeptidase D-amidase/D-esterase (DmpA) family; DmpA catalyzes the release of N-terminal D and L amino acids from peptide susbtrates. DmpA is synthesized as a single polypeptide precursor, which is autocatalytically cleaved to the active heterodimeric form. The cleavage results in two polypeptide chains, with one chain containing an N-terminal nucleophile. This group represent…	pfam03576, Peptidase_S58, Peptidase family S58. 4.13e-67	-	-	sp|A0MTQ2|BAPA_SPHMI Beta-peptidyl aminopeptidase BapA OS=Sphingosinicella microcystinivorans PE=1 SV=1 4.10e-75	-	CAF1205253.1 unnamed protein product [Adineta steineri] >CAF4000948.1 unnamed protein product [Adineta steineri] >CAF4175434.1 unnamed protein product [Adineta steineri] 4.12e-128	-
TRINITY_DN13105_c0_g1	1.00022	5.47906	-2.45362	1.95222e-05	0.00017102	down	cd08942, RhlG_SDR_c, RhlG and related beta-ketoacyl reductases, classical (c) SDRs. Pseudomonas aeruginosa RhlG is an SDR-family beta-ketoacyl reductase involved in Rhamnolipid biosynthesis. RhlG is similar to but distinct from the FabG family of beta-ketoacyl-acyl carrier protein (ACP) of type II fatty acid synthesis. RhlG and related proteins are classical SDRs, with a canonical active site tet…	pfam13561, adh_short_C2, Enoyl-(Acyl carrier protein) reductase. 1.30e-12	-	KOG0725, KOG0725, KOG0725, Reductases with broad range of substrate specificities [General function prediction only]. 1.54e-06	sp|P0AET8|HDHA_ECOLI 7-alpha-hydroxysteroid dehydrogenase OS=Escherichia coli (strain K12) GN=hdhA PE=1 SV=1 9.39e-09	-	MCL4147864.1 hypothetical protein [Idotea baltica] 4.35e-07	-
TRINITY_DN8327_c0_g1	12.8034	0.878696	3.86502	7.36641e-05	0.000559323	up	-	-	-	-	-	-	-	-
TRINITY_DN10951_c0_g1	1.41944	40.815	-4.8457	9.71008e-25	7.09628e-23	down	-	pfam02661, Fic, Fic/DOC family. This family consists of the Fic (filamentation induced by cAMP) protein and doc (death on curing). The Fic protein is involved in cell division and is suggested to be involved in the synthesis of PAB or folate, indicating that the Fic protein and cAMP are involved in a regulatory mechanism of cell division via folate metabolism. This family contains a central conse…	-	KOG3824, KOG3824, KOG3824, Huntingtin interacting protein HYPE [General function prediction only]. 1.52e-06	sp|Q54RJ6|Y5363_DICDI Fido domain-containing protein DDB_G0283145 OS=Dictyostelium discoideum GN=DDB_G0283145 PE=3 SV=2 5.06e-11	-	XP_022901251.1 adenosine monophosphate-protein transferase FICD homolog [Onthophagus taurus] 1.82e-06	-
TRINITY_DN11819_c0_g1	4.04221	103.097	-4.67271	1.54018e-15	5.10117e-14	down	cd05368, DHRS6_like_SDR_c, human DHRS6-like, classical (c) SDRs. Human DHRS6, and similar proteins. These proteins are classical SDRs, with a canonical active site tetrad and a close match to the typical Gly-rich NAD-binding motif. Human DHRS6 is a cytosolic type 2 (R)-hydroxybutyrate dehydrogenase, which catalyses the conversion of (R)-hydroxybutyrate to acetoacetate. Also included in this subgr…	pfam00106, adh_short, short chain dehydrogenase. This family contains a wide variety of dehydrogenases. 1.01e-21	-	KOG1201, KOG1201, KOG1201, Hydroxysteroid 17-beta dehydrogenase 11 [Secondary metabolites biosynthesis, transport and catabolism]. 7.00e-17	sp|A0A097ZPE8|ANDI_EMEVA Short chain dehydrogenase andI OS=Emericella variicolor GN=andI PE=1 SV=1 3.75e-44	-	CAF1510412.1 unnamed protein product [Didymodactylos carnosus] >CAF1598101.1 unnamed protein product [Didymodactylos carnosus] >CAF4298374.1 unnamed protein product [Didymodactylos carnosus] >CAF4473890.1 unnamed protein product [Didymodactylos carnosus] 3.36e-19	-
TRINITY_DN12109_c0_g1	7.17163	54.1586	-2.91682	1.39069e-11	3.07577e-10	down	-	-	-	-	-	-	-	-
TRINITY_DN13738_c0_g1	51.3511	5.4215	3.24363	2.55776e-14	7.7117e-13	up	-	pfam00732, GMC_oxred_N, GMC oxidoreductase. This family of proteins bind FAD as a cofactor. 9.09e-14	K17066-ko00680 Methane metabolism;ko01200 Carbon metabolism	KOG1238, KOG1238, KOG1238, Glucose dehydrogenase/choline dehydrogenase/mandelonitrile lyase (GMC oxidoreductase family) [General function prediction only]. 3.93e-31	sp|P04842|ALOX1_PICPG Alcohol oxidase 1 OS=Komagataella pastoris (strain GS115 / ATCC 20864) GN=AOX1 PE=1 SV=2 4.83e-07	-	KAG1713677.1 Alcohol dehydrogenase [acceptor] [Nymphon striatum] 7.25e-57	-
TRINITY_DN7161_c0_g1	1223.53	532.63	1.19985	0.00176218	0.00919875	up	-	-	-	-	-	-	-	-
TRINITY_DN13954_c1_g5	6.35835	63.5868	-3.322	4.62223e-05	0.000366265	down	cd03369, ABCC_NFT1, ATP-binding cassette domain 2 of NFT1, subfamily C. Domain 2 of NFT1 (New full-length MRP-type transporter 1). NFT1 belongs to the MRP (multidrug resistance-associated protein) family of ABC transporters. Some of the MRP members have five additional transmembrane segments in their N-terminus, but the function of these additional membrane-spanning domains is not clear. The MRP …	pfam00005, ABC_tran, ABC transporter. ABC transporters for a large family of proteins responsible for translocation of a variety of compounds across biological membranes. ABC transporters are the largest family of proteins in many completely sequenced bacteria. ABC transporters are composed of two copies of this domain and two copies of a transmembrane domain pfam00664. These four domains may bel…	-	KOG0054, KOG0054, KOG0054, Multidrug resistance-associated protein/mitoxantrone resistance protein, ABC superfamily [Secondary metabolites biosynthesis, transport and catabolism]. 1.09e-66	sp|O15439|MRP4_HUMAN Multidrug resistance-associated protein 4 OS=Homo sapiens GN=ABCC4 PE=1 SV=3 1.41e-131	-	XP_002110552.1 hypothetical protein TRIADDRAFT_50060 [Trichoplax adhaerens] >EDV26556.1 hypothetical protein TRIADDRAFT_50060 [Trichoplax adhaerens] 2.11e-149	-
TRINITY_DN13954_c1_g2	9.67824	4.80431	1.01041	0.011675	0.0445226	up	cd00200, WD40, WD40 domain, found in a number of eukaryotic proteins that cover a wide variety of functions including adaptor/regulatory modules in signal transduction, pre-mRNA processing and cytoskeleton assembly; typically contains a GH dipeptide 11-24 residues from its N-terminus and the WD dipeptide at its C-terminus and is 40 residues long, hence the name WD40; between GH and WD lies a cons…	pfam00400, WD40, WD domain, G-beta repeat. 6.64e-06	-	KOG0271, KOG0271, KOG0271, Notchless-like WD40 repeat-containing protein [Function unknown]. 1.97e-09	sp|Q00808|HETE1_PODAS Vegetative incompatibility protein HET-E-1 OS=Podospora anserina GN=HET-E1 PE=3 SV=1 5.06e-37	-	KAJ3031652.1 hypothetical protein HDU68_001732 [Siphonaria sp. JEL0065] 5.09e-33	-
TRINITY_DN13954_c1_g1	17.8418	200.747	-3.49205	4.96566e-09	7.86493e-08	down	-	pfam12585, DUF3759, Protein of unknown function (DUF3759). This family of proteins is found in eukaryotes. Proteins in this family are typically between 107 and 132 amino acids in length. There is a single completely conserved residue H that may be functionally important. 2.59e-30	-	-	-	-	CAF1100870.1 unnamed protein product [Rotaria magnacalcarata] >CAF1597911.1 unnamed protein product [Rotaria magnacalcarata] >CAF2075100.1 unnamed protein product [Rotaria magnacalcarata] >CAF2117821.1 unnamed protein product [Rotaria magnacalcarata] >CAF2123018.1 unnamed protein product [Rotaria magnacalcarata] 6.35e-13	-
TRINITY_DN2891_c0_g1	2.76379	15.4709	-2.48483	8.73564e-07	1.00546e-05	down	cd07197, nitrilase, Nitrilase superfamily, including nitrile- or amide-hydrolyzing enzymes and amide-condensing enzymes. This superfamily (also known as the C-N hydrolase superfamily) contains hydrolases that break carbon-nitrogen bonds; it includes nitrilases, cyanide dihydratases, aliphatic amidases, N-terminal amidases, beta-ureidopropionases, biotinidases, pantotheinase, N-carbamyl-D-amino ac…	pfam00795, CN_hydrolase, Carbon-nitrogen hydrolase. This family contains hydrolases that break carbon-nitrogen bonds. The family includes: Nitrilase EC:3.5.5.1, Aliphatic amidase EC:3.5.1.4, Biotidinase EC:3.5.1.12, Beta-ureidopropionase EC:3.5.1.6. Nitrilase-related proteins generally have a conserved E-K-C catalytic triad, and are multimeric alpha-beta-beta-alpha sandwich proteins. 3.09e-20	-	KOG0807, KOG0807, KOG0807, Carbon-nitrogen hydrolase [Amino acid transport and metabolism]. 1.30e-18	sp|O31664|MTNU_BACSU Hydrolase MtnU OS=Bacillus subtilis (strain 168) GN=mtnU PE=3 SV=1 1.62e-15	GO:0003674, molecular_function;GO:0003824, catalytic activity;GO:0006082, organic acid metabolic process;GO:0006107, oxaloacetate metabolic process;GO:0008150, biological_process;GO:0008152, metabolic process;GO:0009636, response to toxic substance;GO:0009987, cellular process;GO:0016787, hydrolase activity;GO:0016810, hydrolase activity, acting on carbon-nitrogen (but not peptide) bonds;GO:00168…	MCL4128442.1 hypothetical protein [Idotea baltica] 9.75e-16	-
TRINITY_DN14090_c0_g5	0.328695	5.3907	-4.03565	0.00179382	0.00933133	down	-	-	-	-	-	-	-	-
TRINITY_DN14090_c0_g4	0.0351332	3.85236	-6.77676	9.85878e-07	1.11969e-05	down	-	-	-	-	-	-	-	-
TRINITY_DN14090_c0_g1	568.795	213.751	1.41198	0.00045632	0.00283162	up	cd02995, PDI_a_PDI_a'_C, PDIa family, C-terminal TRX domain (a') subfamily; composed of the C-terminal redox active a' domains of PDI, ERp72, ERp57 (or ERp60) and EFP1. PDI, ERp72 and ERp57 are endoplasmic reticulum (ER)-resident eukaryotic proteins involved in oxidative protein folding. They are oxidases, catalyzing the formation of disulfide bonds of newly synthesized polypeptides in the ER. Th…	pfam00085, Thioredoxin, Thioredoxin. Thioredoxins are small enzymes that participate in redox reactions, via the reversible oxidation of an active centre disulfide bond. Some members with only the active site are not separated from the noise. 2.21e-15	K09580-ko04141 Protein processing in endoplasmic reticulum	KOG0190, KOG0190, KOG0190, Protein disulfide isomerase (prolyl 4-hydroxylase beta subunit) [Posttranslational modification, protein turnover, chaperones]. 1.15e-13	sp|P55059|PDI_HUMIN Protein disulfide-isomerase OS=Humicola insolens PE=1 SV=1 0.0	GO:0001666, response to hypoxia;GO:0003674, molecular_function;GO:0003756, protein disulfide isomerase activity;GO:0003824, catalytic activity;GO:0004656, procollagen-proline 4-dioxygenase activity;GO:0005102, signaling receptor binding;GO:0005178, integrin binding;GO:0005488, binding;GO:0005515, protein binding;GO:0005575, cellular_component;GO:0005576, extracellular region;GO:0005622, intracell…	KAJ3027790.1 protein disulfide-isomerase precursor [Siphonaria sp. JEL0065] 1.01e-131	-
TRINITY_DN14090_c0_g3	1.9531	46.3153	-4.56765	1.24324e-19	5.80483e-18	down	-	-	-	KOG0409, KOG0409, KOG0409, Predicted dehydrogenase [General function prediction only]. 6.93e-18	sp|F4I907|GLYR2_ARATH Glyoxylate/succinic semialdehyde reductase 2, chloroplastic OS=Arabidopsis thaliana GN=GLYR2 PE=1 SV=1 1.12e-21	-	CAF1063521.1 unnamed protein product [Didymodactylos carnosus] >CAF3831567.1 unnamed protein product [Didymodactylos carnosus] 1.80e-18	-
TRINITY_DN14103_c0_g1	201.124	30.2668	2.73228	3.43663e-20	1.66231e-18	up	-	-	-	-	-	-	-	-
TRINITY_DN14266_c0_g4	83.3261	12.066	2.78782	2.39268e-15	7.82831e-14	up	-	-	-	-	sp|P26370|UGA3_YEAST Transcriptional activator protein UGA3 OS=Saccharomyces cerevisiae (strain ATCC 204508 / S288c) GN=UGA3 PE=1 SV=1 8.49e-07	-	-	-
TRINITY_DN14266_c0_g5	9.74079	214.102	-4.45812	1.48499e-19	6.81523e-18	down	-	pfam08755, YccV-like, Hemimethylated DNA-binding protein YccV like. YccV is a hemimethylated DNA binding protein which has been shown to regulate dnaA gene expression. The structure of one of the hypothetical proteins in this family has been solved and it forms a beta sheet structure with a terminating alpha helix. 1.24e-21	-	-	sp|Q5R5S1|FBX21_PONAB F-box only protein 21 OS=Pongo abelii GN=FBXO21 PE=2 SV=1 3.24e-24	-	CAF3469016.1 unnamed protein product [Rotaria socialis] >CAF4442794.1 unnamed protein product [Rotaria socialis] 5.47e-44	-
TRINITY_DN14394_c0_g1	0.410777	2.44797	-2.57516	0.0122778	0.0464415	down	cd05120, APH_ChoK_like, Aminoglycoside 3'-phosphotransferase and Choline Kinase family. This family is composed of APH, ChoK, ethanolamine kinase (ETNK), macrolide 2'-phosphotransferase (MPH2'), an unusual homoserine kinase, and uncharacterized proteins with similarity to the N-terminal domain of acyl-CoA dehydrogenase 10 (ACAD10). The members of this family catalyze the transfer of the gamma-pho…	-	-	-	-	-	-	-
TRINITY_DN8971_c0_g1	6.40985	28.4958	-2.15239	7.27293e-06	7.01572e-05	down	cd03327, MR_like_2, Mandelate racemase (MR)-like subfamily of the enolase superfamily, subgroup 2. Enzymes of this subgroup share three conserved carboxylate ligands for the essential divalent metal ion (usually Mg2+), two aspartates and a glutamate, and conserved catalytic residues, a Lys-X-Lys motif and a conserved histidine-aspartate dyad. This subgroup's function is unknown. 2.05e-120	pfam13378, MR_MLE_C, Enolase C-terminal domain-like. This domain appears at the C-terminus of many of the proteins that carry the MR_MLE_N pfam02746 domain. EC:4.2.1.40. 4.97e-27	K12661-ko00051 Fructose and mannose metabolism	-	sp|Q12DF1|RHMD_POLSJ L-rhamnonate dehydratase OS=Polaromonas sp. (strain JS666 / ATCC BAA-500) GN=rhmD PE=1 SV=1 3.23e-133	-	CAF1182893.1 unnamed protein product [Didymodactylos carnosus] >CAF3947363.1 unnamed protein product [Didymodactylos carnosus] 2.98e-211	-
TRINITY_DN7276_c0_g1	0.769039	11.9896	-3.96258	3.18218e-12	7.56448e-11	down	-	pfam09994, DUF2235, Uncharacterized alpha/beta hydrolase domain (DUF2235). This domain, found in various hypothetical bacterial proteins, has no known function. 2.47e-37	-	-	sp|P39992|YEC3_YEAST Uncharacterized protein YEL023C OS=Saccharomyces cerevisiae (strain ATCC 204508 / S288c) GN=YEL023C PE=4 SV=1 2.00e-10	-	KAJ3023778.1 hypothetical protein HDU68_008461 [Siphonaria sp. JEL0065] 2.99e-16	-
TRINITY_DN13935_c3_g8	9.5123	4.24481	1.16409	0.000328801	0.00213387	up	-	-	-	-	-	-	-	-
TRINITY_DN10236_c0_g1	0.0597207	5.41731	-6.5032	0.000349984	0.00225179	down	-	-	-	-	-	-	-	-
TRINITY_DN14247_c2_g8	2.84387	1.09842	1.37243	0.00656696	0.0278919	up	-	-	-	-	-	-	-	-
TRINITY_DN14247_c2_g5	605.662	175.941	1.78342	7.95763e-06	7.59988e-05	up	sd00017, ZF_C2H2, Zinc finger, C2H2 type. The C2H2 zinc finger is a classical zinc finger domain. C2H2-type zinc fingers are ubiquitous; more than 1% of all mammalian proteins are predicted to contain at least one zinc finger. They often function as DNA or protein binding structural motifs, such as in eukaryotic transcription factors, and therefore they play important roles in cellular processes …	-	-	-	sp|Q873X0|PACC_GIBMO pH-response transcription factor pacC/RIM101 OS=Gibberella moniliformis GN=PAC1 PE=3 SV=1 7.20e-144	-	KAJ3025408.1 hypothetical protein HDU68_007193 [Siphonaria sp. JEL0065] 4.44e-28	-
TRINITY_DN7103_c0_g1	21.1536	7.90063	1.42087	0.000926794	0.00527406	up	cd09080, TDP2, Phosphodiesterase domain of human TDP2, a 5'-tyrosyl DNA phosphodiesterase, and related domains. Human TDP2, also known as TTRAP (TRAF/TNFR-associated factors, and tumor necrosis factor receptor/TNFR-associated protein), is a 5'-tyrosyl DNA phosphodiesterase. It is required for the efficient repair of topoisomerase II-induced DNA double strand breaks. The topoisomerase is covalentl…	-	-	-	sp|Q5XJA0|TYDP2_DANRE Tyrosyl-DNA phosphodiesterase 2 OS=Danio rerio GN=tdp2 PE=1 SV=3 4.66e-06	-	-	-
TRINITY_DN9197_c0_g1	18.4298	1.24661	3.88596	6.95569e-21	3.68241e-19	up	cd10291, GST_C_YfcG_like, C-terminal, alpha helical domain of Escherichia coli YfcG Glutathione S-transferases and related uncharacterized proteins. Glutathione S-transferase (GST) C-terminal domain family, YfcG-like subfamily; composed of the Escherichia coli YfcG and related proteins. GSTs are cytosolic dimeric proteins involved in cellular detoxification by catalyzing the conjugation of glutat…	-	-	-	sp|P77526|YFCG_ECOLI Disulfide-bond oxidoreductase YfcG OS=Escherichia coli (strain K12) GN=yfcG PE=1 SV=1 2.24e-25	-	KAJ3011845.1 hypothetical protein HDU68_001490 [Siphonaria sp. JEL0065] 2.02e-25	-
TRINITY_DN1920_c0_g1	0.789539	4.91455	-2.63798	0.00698991	0.0292997	down	-	-	-	-	-	-	-	-
TRINITY_DN7965_c0_g1	0.0180118	2.22952	-6.95165	3.87363e-06	3.94612e-05	down	-	-	-	-	sp|P38680|MTR_NEUCR N amino acid transport system protein OS=Neurospora crassa (strain ATCC 24698 / 74-OR23-1A / CBS 708.71 / DSM 1257 / FGSC 987) GN=mtr PE=3 SV=2 1.54e-38	-	-	-
TRINITY_DN9467_c0_g1	24.9967	61.6257	-1.3018	0.00251738	0.012459	down	-	-	-	-	sp|Q875C2|RCF1_PODAN Respiratory supercomplex factor 1, mitochondrial OS=Podospora anserina (strain S / ATCC MYA-4624 / DSM 980 / FGSC 10383) GN=RCF1 PE=3 SV=1 1.28e-34	GO:0005575, cellular_component;GO:0005622, intracellular;GO:0005623, cell;GO:0005737, cytoplasm;GO:0005739, mitochondrion;GO:0005740, mitochondrial envelope;GO:0005743, mitochondrial inner membrane;GO:0005886, plasma membrane;GO:0006996, organelle organization;GO:0007005, mitochondrion organization;GO:0008150, biological_process;GO:0008535, respiratory chain complex IV assembly;GO:0009987, cellul…	-	-
TRINITY_DN11288_c0_g1	19.394	2.52763	2.93976	3.28481e-10	6.15192e-09	up	-	pfam00544, Pec_lyase_C, Pectate lyase. This enzyme forms a right handed beta helix structure. Pectate lyase is an enzyme involved in the maceration and soft rotting of plant tissue. 1.30e-26	K01728-ko00040 Pentose and glucuronate interconversions;ko02024 Quorum sensing	-	sp|Q2TZY0|PLYB_ASPOR Probable pectate lyase B OS=Aspergillus oryzae (strain ATCC 42149 / RIB 40) GN=plyB PE=3 SV=1 1.45e-136	GO:0000272, polysaccharide catabolic process;GO:0003674, molecular_function;GO:0003824, catalytic activity;GO:0005975, carbohydrate metabolic process;GO:0005976, polysaccharide metabolic process;GO:0008150, biological_process;GO:0008152, metabolic process;GO:0009056, catabolic process;GO:0009057, macromolecule catabolic process;GO:0009987, cellular process;GO:0010393, galacturonan metabolic proce…	XP_021953540.1 pectate lyase A [Folsomia candida] >OXA53792.1 Pectate lyase A [Folsomia candida] 2.21e-64	-
TRINITY_DN14228_c0_g1	40.8327	11.1658	1.87064	2.04124e-09	3.42251e-08	up	cd19512, RecA-like_ATAD3-like, ATPase domains of ATPase AAA-domain protein 3A (ATAD3A), -3B, and -3C, and similar ATPase domains. ATPase AAA-domain protein 3 (ATAD3) is a ubiquitously expressed mitochondrial protein involved in mitochondrial dynamics, DNA-nucleoid structural organization, cholesterol transport and steroidogenesis. The ATAD3 gene family in human comprises three paralog genes: ATAD…	pfam00004, AAA, ATPase family associated with various cellular activities (AAA). AAA family proteins often perform chaperone-like functions that assist in the assembly, operation, or disassembly of protein complexes. 2.35e-07	-	KOG0742, KOG0742, KOG0742, AAA+-type ATPase [Posttranslational modification, protein turnover, chaperones]. 1.86e-09	sp|Q5T9A4|ATD3B_HUMAN ATPase family AAA domain-containing protein 3B OS=Homo sapiens GN=ATAD3B PE=1 SV=1 6.22e-08	-	KAJ3018814.1 hypothetical protein HDU68_010978 [Siphonaria sp. JEL0065] 2.11e-45	-
TRINITY_DN10487_c0_g1	11.8087	0.836571	3.81922	3.57612e-09	5.79375e-08	up	-	-	-	-	sp|Q5BEJ5|AFOF_EMENI FAD-linked oxidoreductase afoF OS=Emericella nidulans (strain FGSC A4 / ATCC 38163 / CBS 112.46 / NRRL 194 / M139) GN=afoF PE=1 SV=1 1.97e-20	-	CAF4971518.1 unnamed protein product [Rotaria sp. Silwood1] 1.33e-14	-
TRINITY_DN3470_c0_g1	0.09647	12.2638	-6.99011	7.61568e-07	8.81308e-06	down	-	-	-	-	-	-	-	-
TRINITY_DN22019_c0_g1	0.0001	5.16389	-15.6562	2.26826e-06	2.39978e-05	down	-	-	-	-	-	-	-	-
TRINITY_DN11638_c0_g1	6.7025	2.08495	1.68468	0.000416009	0.0026165	up	cd05381, CAP_PR-1, CAP (cysteine-rich secretory proteins, antigen 5, and pathogenesis-related 1 proteins) domain of pathogenesis-related protein 1 (PR-1) family proteins. Members of pathogenesis-related protein 1 (PR-1) family are among the most abundantly produced proteins in plants on pathogen attack. They are considered hallmarks of hypersensitive response/defense pathways and may act as anti-…	pfam00188, CAP, Cysteine-rich secretory protein family. This is a large family of cysteine-rich secretory proteins, antigen 5, and pathogenesis-related 1 proteins (CAP) that are found in a wide range of organisms, including prokaryotes and non-vertebrate eukaryotes, The nine subfamilies of the mammalian CAP 'super'family include: the human glioma pathogenesis-related 1 (GLIPR1), Golgi associated …	-	KOG3017, KOG3017, KOG3017, Defense-related protein containing SCP domain [Function unknown]. 1.75e-19	sp|P08299|PR1A_TOBAC Pathogenesis-related protein 1A OS=Nicotiana tabacum PE=1 SV=1 8.15e-24	-	XP_022787676.1 ectin-like [Stylophora pistillata] >XP_022787677.1 ectin-like [Stylophora pistillata] 6.28e-25	-
TRINITY_DN10903_c0_g1	0.0364617	4.62244	-6.98613	6.48604e-06	6.31556e-05	down	-	pfam11807, DUF3328, Domain of unknown function (DUF3328). This family of proteins are functionally uncharacterized. This family is only found in eukaryotes. 6.94e-19	-	-	-	-	-	-
TRINITY_DN1592_c0_g1	1.37129	0.0638047	4.42573	0.00476766	0.0214377	up	-	-	-	-	-	-	-	-
TRINITY_DN7400_c0_g1	0.086105	2.10828	-4.61382	0.010271	0.0402196	down	-	-	-	-	-	-	-	-
TRINITY_DN13293_c0_g1	443.54	1508.35	-1.76583	6.27242e-09	9.86495e-08	down	-	-	-	-	-	-	-	-
TRINITY_DN7303_c0_g1	17.3242	3.92179	2.14321	1.88119e-06	2.02048e-05	up	cd17322, MFS_ARN_like, Yeast ARN family of Siderophore iron transporters and similar proteins of the Major Facilitator Superfamily. The ARN family of siderophore iron transporters includes ARN1 (or ferrichrome permease), ARN2 (or triacetylfusarinine C transporter 1 or TAF1), ARN3 (or siderophore iron transporter 1 or SIT1 or ferrioxamine B permease) and ARN4 (or Enterobactin permease or ENB1). Th…	-	-	-	sp|Q870L2|MIRB_EMENI Siderophore iron transporter mirB OS=Emericella nidulans (strain FGSC A4 / ATCC 38163 / CBS 112.46 / NRRL 194 / M139) GN=mirB PE=3 SV=1 5.17e-81	-	-	-
TRINITY_DN13711_c2_g3	146.414	56.3839	1.37669	5.55501e-06	5.49251e-05	up	cd00692, ligninase, Ligninase and other manganese-dependent fungal peroxidases. Ligninases and related extracellular fungal peroxidases belong to class II of the plant heme-dependent peroxidase superfamily. All members of the superfamily share a heme prosthetic group and catalyze a multistep oxidative reaction involving hydrogen peroxide as the electron acceptor. Class II peroxidases are fungal g…	pfam03031, NIF, NLI interacting factor-like phosphatase. This family contains a number of NLI interacting factor isoforms and also an N-terminal regions of RNA polymerase II CTC phosphatase and FCP1 serine phosphatase. This region has been identified as the minimal phosphatase domain. 4.67e-11	-	KOG0323, KOG0323, KOG0323, TFIIF-interacting CTD phosphatases, including NLI-interacting factor [Transcription]. 1.51e-09	sp|Q9P376|FCP1_SCHPO RNA polymerase II subunit A C-terminal domain phosphatase OS=Schizosaccharomyces pombe (strain 972 / ATCC 24843) GN=fcp1 PE=1 SV=1 9.53e-110	GO:0000428, DNA-directed RNA polymerase complex;GO:0003674, molecular_function;GO:0003824, catalytic activity;GO:0004721, phosphoprotein phosphatase activity;GO:0004722, protein serine/threonine phosphatase activity;GO:0005575, cellular_component;GO:0005622, intracellular;GO:0005623, cell;GO:0005634, nucleus;GO:0005654, nucleoplasm;GO:0005737, cytoplasm;GO:0005829, cytosol;GO:0006355, regulation …	XP_018496382.2 RNA polymerase II subunit A C-terminal domain phosphatase [Galendromus occidentalis] 5.46e-61	-
TRINITY_DN13711_c2_g5	24.0925	8.51811	1.49998	3.18289e-05	0.000263063	up	cd14011, PK_SCY1_like, Pseudokinase domain of Scy1-like proteins. The pseudokinase domain shows similarity to protein kinases but lacks crucial residues for catalytic activity. This subfamily is composed of the catalytically inactive kinases with similarity to yeast Scy1. It includes four mammalian proteins called SCY1-like protein 1 (SCYL1), SCYL2, SCYL3, as well as Testis-EXpressed protein 14 (…	-	-	KOG2137, KOG2137, KOG2137, Protein kinase [Signal transduction mechanisms]. 2.60e-52	sp|Q9P7X5|PPK32_SCHPO Protein kinase domain-containing protein ppk32 OS=Schizosaccharomyces pombe (strain 972 / ATCC 24843) GN=ppk32 PE=1 SV=1 7.28e-70	GO:0000166, nucleotide binding;GO:0003674, molecular_function;GO:0003824, catalytic activity;GO:0004672, protein kinase activity;GO:0004674, protein serine/threonine kinase activity;GO:0005488, binding;GO:0005524, ATP binding;GO:0005575, cellular_component;GO:0005622, intracellular;GO:0005623, cell;GO:0005737, cytoplasm;GO:0005829, cytosol;GO:0006464, cellular protein modification process;GO:0006…	CAH1785559.1 unnamed protein product, partial [Owenia fusiformis] 1.50e-67	-
TRINITY_DN13094_c0_g1	5.59139	18.1967	-1.7024	1.49125e-05	0.000135309	down	-	pfam06985, HET, Heterokaryon incompatibility protein (HET). This family represents a conserved region approximately 150 residues long within various heterokaryon incompatibility proteins that seem to be restricted to ascomycete fungi. Genetic differences in specific het genes prevent a viable heterokaryotic fungal cell from being formed by the fusion of filaments from two different wild-type stra…	-	KOG2820, KOG2820, KOG2820, FAD-dependent oxidoreductase [General function prediction only]. 6.14e-19	sp|Q9UTM9|FAP2_SCHPO L-saccharopine oxidase OS=Schizosaccharomyces pombe (strain 972 / ATCC 24843) GN=fap2 PE=1 SV=1 4.57e-31	-	KAJ3016002.1 hypothetical protein HDU68_012468 [Siphonaria sp. JEL0065] 1.04e-54	-
TRINITY_DN6794_c0_g1	59.8287	8.08576	2.88738	4.64183e-07	5.55326e-06	up	-	pfam00326, Peptidase_S9, Prolyl oligopeptidase family. 1.97e-17	-	KOG2100, KOG2100, KOG2100, Dipeptidyl aminopeptidase [Posttranslational modification, protein turnover, chaperones]. 2.18e-15	sp|P34422|DPF6_CAEEL Dipeptidyl peptidase family member 6 OS=Caenorhabditis elegans GN=dpf-6 PE=3 SV=2 1.93e-25	-	XP_048259683.1 uncharacterized protein LOC124146647 [Haliotis rufescens] 5.05e-105	-
TRINITY_DN10264_c0_g1	6.58724	3.03861	1.11626	0.00254477	0.0125668	up	-	-	-	-	-	-	CAF1097852.1 unnamed protein product [Didymodactylos carnosus] >CAF3859366.1 unnamed protein product [Didymodactylos carnosus] 6.85e-28	-
TRINITY_DN12895_c0_g1	6.99891	25.2551	-1.85137	3.43085e-06	3.52504e-05	down	-	-	-	-	-	-	-	-
TRINITY_DN9715_c0_g1	147.095	55.3414	1.41032	6.26775e-06	6.14304e-05	up	cd07795, FGGY_ScGut1p_like, Saccharomyces cerevisiae Gut1p and related proteins; belongs to the FGGY family of carbohydrate kinases. This subgroup corresponds to a small group of fungal glycerol kinases (GK), including Saccharomyces cerevisiae Gut1p/YHL032Cp, which phosphorylates glycerol to glycerol-3-phosphate in the cytosol. Glycerol utilization has been considered as the sole source of carbon…	pfam00370, FGGY_N, FGGY family of carbohydrate kinases, N-terminal domain. This domain adopts a ribonuclease H-like fold and is structurally related to the C-terminal domain. 3.05e-26	K00864-ko00561 Glycerolipid metabolism;ko04626 Plant-pathogen interaction;ko03320 PPAR signaling pathway	KOG2517, KOG2517, KOG2517, Ribulose kinase and related carbohydrate kinases [Carbohydrate transport and metabolism]. 3.15e-86	sp|Q4R4D5|GLPK2_MACFA Glycerol kinase 2 OS=Macaca fascicularis GN=GK2 PE=2 SV=1 9.65e-135	-	XP_046854045.1 glycerol kinase-like [Xenia sp. Carnegie-2017] >XP_046854046.1 glycerol kinase-like [Xenia sp. Carnegie-2017] 1.28e-146	-
TRINITY_DN11804_c0_g1	5.90982	0.886414	2.73706	8.05112e-08	1.08263e-06	up	-	pfam00295, Glyco_hydro_28, Glycosyl hydrolases family 28. Glycosyl hydrolase family 28 includes polygalacturonase EC:3.2.1.15 as well as rhamnogalacturonase A(RGase A), EC:3.2.1.-. These enzymes are important in cell wall metabolism. 2.67e-11	K01213-ko00040 Pentose and glucuronate interconversions;ko00500 Starch and sucrose metabolism	-	sp|A1DAX2|PGXB_NEOFI Probable exopolygalacturonase B OS=Neosartorya fischeri (strain ATCC 1020 / DSM 3700 / FGSC A1164 / NRRL 181) GN=pgxB PE=3 SV=1 8.18e-165	GO:0000272, polysaccharide catabolic process;GO:0003674, molecular_function;GO:0003824, catalytic activity;GO:0004553, hydrolase activity, hydrolyzing O-glycosyl compounds;GO:0004650, polygalacturonase activity;GO:0005575, cellular_component;GO:0005576, extracellular region;GO:0005975, carbohydrate metabolic process;GO:0005976, polysaccharide metabolic process;GO:0008150, biological_process;GO:00…	CAF1502399.1 unnamed protein product [Adineta ricciae] 4.34e-37	-
TRINITY_DN10782_c0_g2	6.3073	121.096	-4.26298	9.54842e-15	2.97217e-13	down	-	pfam03171, 2OG-FeII_Oxy, 2OG-Fe(II) oxygenase superfamily. This family contains members of the 2-oxoglutarate (2OG) and Fe(II)-dependent oxygenase superfamily. This family includes the C-terminal of prolyl 4-hydroxylase alpha subunit. The holoenzyme has the activity EC:1.14.11.2 catalyzing the reaction: Procollagen L-proline + 2-oxoglutarate + O2 <=> procollagen trans- 4-hydroxy-L-proline + succi…	-	KOG0143, KOG0143, KOG0143, Iron/ascorbate family oxidoreductases [Secondary metabolites biosynthesis, transport and catabolism, General function prediction only]. 4.57e-25	sp|Q54RA4|Y3291_DICDI Probable iron/ascorbate oxidoreductase DDB_G0283291 OS=Dictyostelium discoideum GN=DDB_G0283291 PE=3 SV=1 4.29e-28	-	KAJ3027834.1 hypothetical protein HDU68_003035, partial [Siphonaria sp. JEL0065] 3.32e-68	-
TRINITY_DN12734_c0_g1	1.49986	5.9894	-1.99758	5.57468e-05	0.000435071	down	cd01154, AidB, Proteins involved in DNA damage response, similar to the AidB gene product. AidB is one of several genes involved in the SOS adaptive response to DNA alkylation damage, whose expression is activated by the Ada protein. Its function has not been entirely elucidated; however, it is similar in sequence and function to acyl-CoA dehydrogenases. It has been proposed that aidB directly de…	-	-	-	sp|Q9XWZ2|ACD11_CAEEL Acyl-CoA dehydrogenase family member 11 OS=Caenorhabditis elegans GN=acdh-11 PE=1 SV=1 6.55e-51	-	XP_029960378.1 acyl-CoA dehydrogenase family member 11-like [Salarias fasciatus] 4.19e-69	-
TRINITY_DN7243_c0_g1	12.0537	1.37038	3.13683	2.8576e-07	3.51887e-06	up	cd08248, RTN4I1, Human Reticulon 4 Interacting Protein 1. Human Reticulon 4 Interacting Protein 1 is a member of the medium chain dehydrogenase/ reductase (MDR) family. Riticulons are endoplasmic reticulum associated proteins involved in membrane trafficking and neuroendocrine secretion. The MDR/zinc-dependent alcohol dehydrogenase-like family, which contains the zinc-dependent alcohol dehydrogen…	-	-	-	sp|Q9ZUC1|QORL_ARATH Quinone oxidoreductase-like protein At1g23740, chloroplastic OS=Arabidopsis thaliana GN=At1g23740 PE=2 SV=2 8.20e-06	-	XP_037030249.1 2-methylene-furan-3-one reductase-like [Bradysia coprophila] 8.45e-41	-
TRINITY_DN3493_c0_g1	2.69571	0.0655007	5.36301	0.000506647	0.0031024	up	-	-	-	-	-	-	-	-
TRINITY_DN25558_c0_g1	1.99873	0.1662	3.58809	0.00503242	0.0224447	up	-	-	-	-	-	-	-	-
TRINITY_DN9645_c0_g1	0.816671	5.95845	-2.86711	5.19452e-07	6.15425e-06	down	cd00833, PKS, polyketide synthases (PKSs) polymerize simple fatty acids into a large variety of different products, called polyketides, by successive decarboxylating Claisen condensations. PKSs can be divided into 2 groups, modular type I PKSs consisting of one or more large multifunctional proteins and iterative type II PKSs, complexes of several monofunctional subunits. 3.73e-83	pfam00698, Acyl_transf_1, Acyl transferase domain. 3.50e-32	-	KOG1202, KOG1202, KOG1202, Animal-type fatty acid synthase and related proteins [Lipid transport and metabolism]. 1.82e-11	sp|Q3S2U6|MOKB_MONPI Lovastatin diketide synthase mokB OS=Monascus pilosus GN=mokB PE=1 SV=1 1.23e-09	-	CAD7230391.1 unnamed protein product [Cyprideis torosa] >CAG0896286.1 unnamed protein product [Cyprideis torosa] 6.85e-150	-
TRINITY_DN13521_c0_g1	83.379	19.5607	2.09173	4.94843e-09	7.84688e-08	up	cd05041, PTKc_Fes_like, Catalytic domain of Fes-like Protein Tyrosine Kinases. Protein Tyrosine Kinase (PTK) family; Fes subfamily; catalytic (c) domain. Fes subfamily members include Fes (or Fps), Fer, and similar proteins. The PTKc family is part of a larger superfamily that includes the catalytic domains of other kinases such as protein serine/threonine kinases, RIO kinases, and phosphoinositi…	pfam07714, Pkinase_Tyr, Protein tyrosine kinase. 1.52e-11	-	KOG0589, KOG0589, KOG0589, Serine/threonine protein kinase [General function prediction only]. 3.87e-15	sp|Q8GTB6|THCAS_CANSA Tetrahydrocannabinolic acid synthase OS=Cannabis sativa PE=1 SV=1 1.35e-31	-	XP_022807093.1 uncharacterized protein LOC111344146 [Stylophora pistillata] 1.27e-46	-
TRINITY_DN25828_c0_g1	4.25377	0.141232	4.91261	6.56732e-11	1.34007e-09	up	cd17327, MFS_FEN2_like, Pantothenate transporter FEN2 and similar transporters of the Major Facilitator Superfamily. This family is composed of Saccharomyces cerevisiae pantothenate transporter FEN2 (or fenpropimorph resistance protein 2) and similar proteins from fungi and bacteria including fungal vitamin H transporter, allantoate permease, and high-affinity nicotinic acid transporter, as well …	-	-	KOG2533, KOG2533, KOG2533, Permease of the major facilitator superfamily [Carbohydrate transport and metabolism]. 3.27e-52	sp|Q9US44|YIZG_SCHPO Uncharacterized transporter C1002.16c OS=Schizosaccharomyces pombe (strain 972 / ATCC 24843) GN=SPAC1002.16c PE=3 SV=1 9.34e-64	-	CAF1199070.1 unnamed protein product [Adineta steineri] >CAF3710281.1 unnamed protein product [Adineta steineri] 2.44e-70	-
TRINITY_DN9956_c0_g1	20.9259	9.53412	1.13412	0.000567628	0.00342743	up	-	-	-	-	-	-	-	-
TRINITY_DN12413_c0_g1	2.4349	10.5291	-2.11244	0.000865782	0.00497742	down	-	-	-	-	-	-	-	-
TRINITY_DN13296_c0_g1	173.128	30.2112	2.51868	2.78253e-10	5.27738e-09	up	-	-	-	-	-	-	-	-
TRINITY_DN11642_c0_g1	3.13016	0.859334	1.86495	0.00195142	0.0100117	up	-	pfam00561, Abhydrolase_1, alpha/beta hydrolase fold. This catalytic domain is found in a very wide range of enzymes. 8.60e-06	-	KOG4178, KOG4178, KOG4178, Soluble epoxide hydrolase [Lipid transport and metabolism]. 1.40e-15	sp|Q8IUS5|EPHX4_HUMAN Epoxide hydrolase 4 OS=Homo sapiens GN=EPHX4 PE=2 SV=2 3.01e-21	-	XP_004715594.1 epoxide hydrolase 3 [Echinops telfairi] 1.14e-12	-
TRINITY_DN12254_c0_g1	25.6849	83.137	-1.69457	7.30599e-05	0.000555362	down	-	pfam06441, EHN, Epoxide hydrolase N-terminus. This family represents the N-terminal region of the eukaryotic epoxide hydrolase protein. Epoxide hydrolases (EC:3.3.2.3) comprise a group of functionally related enzymes that catalyze the addition of water to oxirane compounds (epoxides), thereby usually generating vicinal trans-diols. EHs have been found in all types of living organisms, including m…	-	KOG2565, KOG2565, KOG2565, Predicted hydrolases or acyltransferases (alpha/beta hydrolase superfamily) [General function prediction only]. 1.16e-47	sp|Q06816|HYEP_STIAD Putative epoxide hydrolase OS=Stigmatella aurantiaca (strain DW4/3-1) GN=STAUR_4299 PE=3 SV=2 1.91e-76	-	CAF0927265.1 unnamed protein product [Rotaria sordida] >CAF0979160.1 unnamed protein product [Rotaria sordida] 2.34e-79	-
TRINITY_DN2672_c0_g1	6.35478	847.126	-7.05859	1.74195e-43	4.18286e-41	down	-	-	-	-	-	-	-	-
TRINITY_DN12166_c0_g1	3.4054	35.4895	-3.38149	2.99008e-20	1.46209e-18	down	-	-	-	-	-	-	CBY19614.1 unnamed protein product [Oikopleura dioica] 3.70e-18	-
TRINITY_DN13422_c0_g1	0.988243	6.40161	-2.6955	4.399e-07	5.28627e-06	down	cd08297, CAD3, Cinnamyl alcohol dehydrogenases (CAD). These alcohol dehydrogenases are related to the cinnamyl alcohol dehydrogenases (CAD), members of the medium chain dehydrogenase/reductase family. NAD(P)(H)-dependent oxidoreductases are the major enzymes in the interconversion of alcohols and aldehydes, or ketones. Cinnamyl alcohol dehydrogenases (CAD) reduce cinnamaldehydes to cinnamyl alcoh…	pfam08240, ADH_N, Alcohol dehydrogenase GroES-like domain. This is the catalytic domain of alcohol dehydrogenases. Many of them contain an inserted zinc binding domain. This domain has a GroES-like structure. 4.40e-10	K13953-ko00010 Glycolysis / Gluconeogenesis;ko00350 Tyrosine metabolism;ko00071 Fatty acid degradation;ko00830 Retinol metabolism;ko00626 Naphthalene degradation;ko01220 Degradation of aromatic compounds;ko00625 Chloroalkane and chloroalkene degradation;ko00982 Drug metabolism - cytochrome P450;ko00980 Metabolism of xenobiotics by cytochrome P450	KOG0023, KOG0023, KOG0023, Alcohol dehydrogenase, class V [Secondary metabolites biosynthesis, transport and catabolism]. 8.53e-53	sp|O00097|ADH1_PICST Alcohol dehydrogenase 1 OS=Scheffersomyces stipitis (strain ATCC 58785 / CBS 6054 / NBRC 10063 / NRRL Y-11545) GN=ADH1 PE=3 SV=1 6.76e-55	-	KAI6214406.1 hypothetical protein M3Y94_00264500 [Aphelenchoides besseyi] >KAI6236143.1 alcohol dehydrogenase [Aphelenchoides besseyi] 5.80e-57	-
TRINITY_DN18346_c0_g1	0.074133	2.12995	-4.84456	0.004649	0.0209994	down	-	-	-	-	-	-	-	-
TRINITY_DN12595_c0_g1	172.565	876.612	-2.3448	4.01959e-10	7.43486e-09	down	cd00320, cpn10, Chaperonin 10 Kd subunit (cpn10 or GroES); Cpn10 cooperates with chaperonin 60 (cpn60 or GroEL), an ATPase, to assist the folding and assembly of proteins and is found in eubacterial cytosol, as well as in the matrix of mitochondria and chloroplasts. It forms heptameric rings with a dome-like structure, forming a lid to the large cavity of the tetradecameric cpn60 cylinder and the…	pfam00166, Cpn10, Chaperonin 10 Kd subunit. This family contains GroES and Gp31-like chaperonins. Gp31 is a functional co-chaperonin that is required for the folding and assembly of Gp23, a major capsid protein, during phage morphogenesis. 3.29e-18	-	KOG1641, KOG1641, KOG1641, Mitochondrial chaperonin [Posttranslational modification, protein turnover, chaperones]. 2.20e-28	sp|O59804|CH10_SCHPO 10 kDa heat shock protein, mitochondrial OS=Schizosaccharomyces pombe (strain 972 / ATCC 24843) GN=hsp10 PE=1 SV=1 1.20e-33	GO:0003674, molecular_function;GO:0005488, binding;GO:0005515, protein binding;GO:0005575, cellular_component;GO:0005622, intracellular;GO:0005623, cell;GO:0005737, cytoplasm;GO:0005739, mitochondrion;GO:0005759, mitochondrial matrix;GO:0006457, protein folding;GO:0006458, 'de novo' protein folding;GO:0006605, protein targeting;GO:0006626, protein targeting to mitochondrion;GO:0006810, transport;…	XP_023270683.1 10 kDa chaperonin, mitochondrial-like, partial [Seriola lalandi dorsalis] 2.10e-23	-
TRINITY_DN12452_c0_g1	9.37909	3.02025	1.63478	4.61655e-05	0.000366031	up	-	pfam06985, HET, Heterokaryon incompatibility protein (HET). This family represents a conserved region approximately 150 residues long within various heterokaryon incompatibility proteins that seem to be restricted to ascomycete fungi. Genetic differences in specific het genes prevent a viable heterokaryotic fungal cell from being formed by the fusion of filaments from two different wild-type stra…	-	-	sp|Q9UV10|HET6_NEUCR Heterokaryon incompatibility protein 6, OR allele OS=Neurospora crassa (strain ATCC 24698 / 74-OR23-1A / CBS 708.71 / DSM 1257 / FGSC 987) GN=het-6 PE=4 SV=1 8.71e-19	-	KAI1691421.1 heterokaryon incompatibility protein (HET) domain-containing protein [Ditylenchus destructor] 5.05e-14	-
TRINITY_DN13181_c0_g1	1.9313	45.4261	-4.55587	3.59369e-23	2.35729e-21	down	-	-	-	-	-	-	-	-
TRINITY_DN3463_c0_g1	0.111456	4.27808	-5.26242	3.24996e-06	3.37209e-05	down	-	-	-	-	-	-	XP_037038162.1 uncharacterized protein LOC119075726 [Bradysia coprophila] >XP_037038163.1 uncharacterized protein LOC119075726 [Bradysia coprophila] 9.84e-38	-
TRINITY_DN12097_c0_g1	2.11164	6.74231	-1.67488	0.00148795	0.00793044	down	-	-	-	-	-	-	-	-
TRINITY_DN10356_c0_g1	0.0916957	12.6601	-7.10922	1.27435e-13	3.54054e-12	down	-	pfam00891, Methyltransf_2, O-methyltransferase. This family includes a range of O-methyltransferases. These enzymes utilize S-adenosyl methionine. 2.42e-15	-	KOG3178, KOG3178, KOG3178, Hydroxyindole-O-methyltransferase and related SAM-dependent methyltransferases [General function prediction only]. 1.12e-10	sp|D7PI16|GSFB_PENAE O-methyltransferase gsfB OS=Penicillium aethiopicum GN=gsfB PE=1 SV=1 4.88e-64	-	XP_009020681.1 hypothetical protein HELRODRAFT_192339 [Helobdella robusta] >ESO01445.1 hypothetical protein HELRODRAFT_192339 [Helobdella robusta] 4.30e-12	-
TRINITY_DN10921_c0_g1	8.97742	19.4844	-1.11795	0.0103126	0.0403123	down	-	-	-	-	-	-	-	-
TRINITY_DN17034_c0_g1	2.01278	27.1629	-3.75437	3.77636e-07	4.56661e-06	down	cd02233, cupin_HNL-like, Granulicella tundricola hydroxynitrile lyase (GtHNL) and related proteins, cupin domain. This family includes archaeal, eukaryotic, and bacterial proteins homologous to hydroxynitrile lyase from Granulicella tundricola (GtHNL), a novel class of HNLs that does not show any sequence or structural similarity to any other HNL and does not contain conserved motifs typical of H…	-	-	-	-	-	-	-
TRINITY_DN14182_c1_g4	55.8907	17.8996	1.64268	1.15637e-05	0.00010724	up	cd00202, ZnF_GATA, Zinc finger DNA binding domain; binds specifically to DNA consensus sequence [AT]GATA[AG] promoter elements; a subset of family members may also bind protein; zinc-finger consensus topology is C-X(2)-C-X(17)-C-X(2)-C. 1.16e-10	-	-	KOG1601, KOG1601, KOG1601, GATA-4/5/6 transcription factors [Transcription]. 4.54e-06	sp|P78688|AREA_GIBFU Nitrogen regulatory protein areA OS=Gibberella fujikuroi GN=AREA PE=3 SV=1 1.28e-30	-	XP_040185919.1 transcription factor GATA-5 [Rana temporaria] 3.38e-10	-
TRINITY_DN14182_c1_g3	995.153	23.8657	5.3819	1.69082e-46	4.83754e-44	up	cd08022, M28_PSMA_like, M28 Zn-peptidase prostate-specific membrane antigen. Peptidase M28 family; prostate-specific membrane antigen (PSMA, also called glutamate carboxypeptidase II or GCP-II)-like subfamily. PSMA is a homodimeric type II transmembrane protein containing three distinct domains: protease-like, apical or protease-associated (PA) and helical domains. The protease-like domain is a l…	pfam04389, Peptidase_M28, Peptidase family M28. 1.17e-14	-	KOG2195, KOG2195, KOG2195, Transferrin receptor and related proteins containing the protease-associated (PA) domain [Posttranslational modification, protein turnover, chaperones, Inorganic ion transport and metabolism, General function prediction only]. 1.61e-85	sp|D4B1R0|GCP1_ARTBC Probable glutamate carboxypeptidase ARB_02390 OS=Arthroderma benhamiae (strain ATCC MYA-4681 / CBS 112371) GN=ARB_02390 PE=1 SV=1 0.0	GO:0000122, negative regulation of transcription by RNA polymerase II;GO:0000976, transcription regulatory region sequence-specific DNA binding;GO:0000977, RNA polymerase II regulatory region sequence-specific DNA binding;GO:0000978, RNA polymerase II proximal promoter sequence-specific DNA binding;GO:0000981, RNA polymerase II transcription factor activity, sequence-specific DNA binding;GO:00009…	XP_041468028.1 putative N-acetylated-alpha-linked acidic dipeptidase [Lytechinus variegatus] 4.13e-100	-
TRINITY_DN13967_c0_g4	20.042	42.8617	-1.09666	0.00353207	0.0166011	down	cd18675, PIN_SpAst1-like, FEN-like PIN domain of Schizosaccharomyces pombe asteroid homolog 1 and related proteins. Schizosaccharomyces pombe Ast1 is a homologue of Drosophila Asteroid and human ASTE1. Ast1 appears to be involved in mounting a checkpoint response to endogenous damage in cells lacking Rad2 and Exo1. This subfamily belongs to the structure-specific, 5' nuclease family (FEN-like) th…	pfam04547, Anoctamin, Calcium-activated chloride channel. The family carries eight putative transmembrane domains, and, although it has no similarity to other known channel proteins, it is clearly a calcium-activated ionic channel. It is expressed in various secretory epithelia, the retina and sensory neurons, and mediates receptor-activated chloride currents in diverse physiological processes. 5…	-	KOG2513, KOG2513, KOG2513, Protein required for meiotic chromosome segregation [Cell cycle control, cell division, chromosome partitioning]. 1.88e-57	sp|O13621|YNG5_SCHPO Uncharacterized protein C691.05c OS=Schizosaccharomyces pombe (strain 972 / ATCC 24843) GN=pi030 PE=4 SV=1 1.22e-83	GO:0003674, molecular_function;GO:0005488, binding;GO:0005575, cellular_component;GO:0005622, intracellular;GO:0005623, cell;GO:0005737, cytoplasm;GO:0005783, endoplasmic reticulum;GO:0005886, plasma membrane;GO:0005933, cellular bud;GO:0005938, cell cortex;GO:0006996, organelle organization;GO:0007029, endoplasmic reticulum organization;GO:0008104, protein localization;GO:0008150, biological_pro…	KAJ3011945.1 hypothetical protein HDU68_001447 [Siphonaria sp. JEL0065] 2.98e-60	-
TRINITY_DN13967_c0_g2	0.999352	3.94066	-1.97937	0.000994764	0.00562191	down	-	pfam06985, HET, Heterokaryon incompatibility protein (HET). This family represents a conserved region approximately 150 residues long within various heterokaryon incompatibility proteins that seem to be restricted to ascomycete fungi. Genetic differences in specific het genes prevent a viable heterokaryotic fungal cell from being formed by the fusion of filaments from two different wild-type stra…	-	-	-	-	KAI1693513.1 heterokaryon incompatibility protein (HET) domain-containing protein [Ditylenchus destructor] 2.98e-21	-
TRINITY_DN3442_c0_g1	0.757869	9.80674	-3.69375	0.000135753	0.000966878	down	-	-	-	-	-	-	-	-
TRINITY_DN13687_c0_g4	15.3155	96.5559	-2.65637	2.47193e-15	8.04844e-14	down	-	pfam05183, RdRP, RNA dependent RNA polymerase. This family of proteins are eukaryotic RNA dependent RNA polymerases. These proteins are involved in post transcriptional gene silencing where they are thought to amplify dsRNA templates. 7.57e-19	-	KOG2066, KOG2066, KOG2066, Vacuolar assembly/sorting protein VPS41 [Intracellular trafficking, secretion, and vesicular transport]. 3.45e-13	sp|Q5KU39|VPS41_MOUSE Vacuolar protein sorting-associated protein 41 homolog OS=Mus musculus GN=Vps41 PE=1 SV=1 2.39e-50	GO:0000322, storage vacuole;GO:0000323, lytic vacuole;GO:0000324, fungal-type vacuole;GO:0000329, fungal-type vacuole membrane;GO:0003674, molecular_function;GO:0005488, binding;GO:0005515, protein binding;GO:0005575, cellular_component;GO:0005622, intracellular;GO:0005623, cell;GO:0005737, cytoplasm;GO:0005768, endosome;GO:0005770, late endosome;GO:0005773, vacuole;GO:0005774, vacuolar membrane;…	XP_032239770.1 vacuolar protein sorting-associated protein 41 homolog isoform X1 [Nematostella vectensis] 8.45e-76	-
TRINITY_DN13687_c0_g2	2.58146	0.476674	2.43711	0.00268082	0.0131135	up	-	-	-	-	sp|D4AYG1|KLDC1_ARTBC Kelch repeat-containing protein ARB_01230 OS=Arthroderma benhamiae (strain ATCC MYA-4681 / CBS 112371) GN=ARB_01230 PE=1 SV=1 2.30e-11	-	-	-
TRINITY_DN13687_c0_g1	43.7976	18.7325	1.22531	0.000561991	0.0033995	up	-	pfam06985, HET, Heterokaryon incompatibility protein (HET). This family represents a conserved region approximately 150 residues long within various heterokaryon incompatibility proteins that seem to be restricted to ascomycete fungi. Genetic differences in specific het genes prevent a viable heterokaryotic fungal cell from being formed by the fusion of filaments from two different wild-type stra…	-	-	sp|Q9UV10|HET6_NEUCR Heterokaryon incompatibility protein 6, OR allele OS=Neurospora crassa (strain ATCC 24698 / 74-OR23-1A / CBS 708.71 / DSM 1257 / FGSC 987) GN=het-6 PE=4 SV=1 1.38e-09	-	KAI1691421.1 heterokaryon incompatibility protein (HET) domain-containing protein [Ditylenchus destructor] 6.97e-17	-
TRINITY_DN12656_c0_g1	54.0438	281.509	-2.38098	0.000116397	0.000841777	down	-	-	-	-	-	GO:0000002, mitochondrial genome maintenance;GO:0003674, molecular_function;GO:0005198, structural molecule activity;GO:0005199, structural constituent of cell wall;GO:0005575, cellular_component;GO:0005618, cell wall;GO:0005622, intracellular;GO:0005623, cell;GO:0005737, cytoplasm;GO:0005739, mitochondrion;GO:0005840, ribosome;GO:0006996, organelle organization;GO:0007005, mitochondrion organiza…	-	-
TRINITY_DN12997_c0_g1	2.92241	8.97957	-1.61949	0.0110288	0.0426041	down	-	pfam01425, Amidase, Amidase. 2.26e-29	K01426-ko00627 Aminobenzoate degradation;ko00643 Styrene degradation;ko00360 Phenylalanine metabolism;ko00380 Tryptophan metabolism;ko00330 Arginine and proline metabolism	KOG1212, KOG1212, KOG1212, Amidases [Translation, ribosomal structure and biogenesis, Lipid transport and metabolism, Signal transduction mechanisms]. 2.71e-55	sp|Q12559|AMDS_ASPOR Acetamidase OS=Aspergillus oryzae (strain ATCC 42149 / RIB 40) GN=amdS PE=3 SV=2 1.31e-89	-	CAF3711633.1 unnamed protein product [Rotaria sp. Silwood1] 1.57e-97	-
TRINITY_DN26642_c0_g1	1.3164	13.3661	-3.34391	9.99176e-06	9.37608e-05	down	-	-	-	-	-	-	-	-
TRINITY_DN7652_c0_g1	7.03111	0.0633804	6.79357	3.15636e-09	5.15092e-08	up	-	-	-	-	sp|G2QJR6|GCE2_MYCTT 4-O-methyl-glucuronoyl methylesterase OS=Myceliophthora thermophila (strain ATCC 42464 / BCRC 31852 / DSM 1799) GN=ge2 PE=1 SV=1 1.86e-176	-	-	-
TRINITY_DN12224_c0_g1	1.07826	3.47883	-1.68989	0.0129531	0.0485589	down	-	-	-	-	-	-	-	-
TRINITY_DN13604_c0_g1	7.76209	30.562	-1.97722	1.09997e-05	0.000102362	down	cd16147, G6S, glucosamine (N-acetyl)-6-sulfatase(G6S, GNS) AND sulfatase 1(SULF1). N-acetylglucosamine-6-sulfatase also known as glucosamine (N-acetyl)-6-sulfatase hydrolyzes of the 6-sulfate groups of the N-acetyl-D-glucosamine 6-sulfate units of heparan sulfate and keratan sulfate. Deficient of N-acetylglucosamine-6-sulfatase results in disease of Sanfilippo Syndrome type IIId or Mucopolysaccha…	pfam00884, Sulfatase, Sulfatase. 2.90e-10	-	KOG3731, KOG3731, KOG3731, Sulfatases [Carbohydrate transport and metabolism]. 6.06e-42	sp|Q10723|ARS_VOLCA Arylsulfatase OS=Volvox carteri PE=1 SV=1 1.10e-13	-	KAJ3030951.1 hypothetical protein HDU68_007151 [Siphonaria sp. JEL0065] 1.15e-101	-
TRINITY_DN13104_c0_g1	24.911	50.1477	-1.0094	0.00320594	0.0152982	down	-	-	-	-	-	-	-	-
TRINITY_DN10016_c0_g1	12.8534	38.0817	-1.56695	0.000246637	0.00165165	down	cd10938, CE4_HpPgdA_like, Catalytic domain of Helicobacter pylori peptidoglycan deacetylase (HpPgdA) and similar proteins. This family is represented by a peptidoglycan deacetylase (HP0310, HpPgdA) from the gram-negative pathogen Helicobacter pylori. HpPgdA has the ability to bind a metal ion at the active site and is responsible for a peptidoglycan modification that counteracts the host immune r…	pfam01522, Polysacc_deac_1, Polysaccharide deacetylase. This domain is found in polysaccharide deacetylase. This family of polysaccharide deacetylases includes NodB (nodulation protein B from Rhizobium) which is a chitooligosaccharide deacetylase. It also includes chitin deacetylase from yeast, and endoxylanases which hydrolyzes glucosidic bonds in xylan. 8.07e-11	-	-	sp|B5ZA76|PGDAE_HELPG Peptidoglycan deacetylase OS=Helicobacter pylori (strain G27) GN=pgdA PE=1 SV=1 7.93e-142	-	KAF5303115.1 hypothetical protein FQR65_LT19042 [Abscondita terminalis] 1.10e-113	-
TRINITY_DN8610_c0_g1	6.05606	16.3914	-1.43649	0.00457525	0.0207219	down	-	-	-	-	-	-	-	-
TRINITY_DN8912_c0_g1	90.9024	40.516	1.16583	0.000359226	0.00230243	up	-	pfam07915, PRKCSH, Glucosidase II beta subunit-like protein. The sequences found in this family are similar to a region found in the beta-subunit of glucosidase II, which is also known as protein kinase C substrate 80K-H (PRKCSH). The enzyme catalyzes the sequential removal of two alpha-1,3-linked glucose residues in the second step of N-linked oligosaccharide processing. The beta subunit is requ…	K10088-ko04141 Protein processing in endoplasmic reticulum	KOG3394, KOG3394, KOG3394, Protein OS-9 [General function prediction only]. 3.95e-18	sp|Q4IEA7|OS9_GIBZE Protein OS-9 homolog OS=Gibberella zeae (strain PH-1 / ATCC MYA-4620 / FGSC 9075 / NRRL 31084) GN=YOS1 PE=3 SV=1 6.20e-89	GO:0003674, molecular_function;GO:0005488, binding;GO:0005575, cellular_component;GO:0005622, intracellular;GO:0005623, cell;GO:0005737, cytoplasm;GO:0005783, endoplasmic reticulum;GO:0005788, endoplasmic reticulum lumen;GO:0006508, proteolysis;GO:0006511, ubiquitin-dependent protein catabolic process;GO:0006516, glycoprotein catabolic process;GO:0006807, nitrogen compound metabolic process;GO:00…	CAB3979125.1 Hypothetical predicted protein [Paramuricea clavata] 7.20e-17	-
TRINITY_DN7194_c0_g1	0.232351	8.21447	-5.14379	5.05359e-08	7.0202e-07	down	-	-	-	-	-	-	-	-
TRINITY_DN13467_c0_g2	189.196	12.0625	3.97128	1.7579e-30	1.93758e-28	up	-	-	-	KOG1558, KOG1558, KOG1558, Fe2+/Zn2+ regulated transporter [Inorganic ion transport and metabolism]. 9.27e-12	sp|Q9SLG3|ZIP3_ARATH Zinc transporter 3 OS=Arabidopsis thaliana GN=ZIP3 PE=2 SV=1 6.78e-20	-	CAF0925506.1 unnamed protein product [Rotaria sp. Silwood1] >CAF1331750.1 unnamed protein product [Rotaria sp. Silwood1] 1.41e-10	-
TRINITY_DN9784_c0_g2	96.0256	347.073	-1.85375	0.00013829	0.000983389	down	-	-	-	-	-	-	-	-
TRINITY_DN12387_c0_g1	34.9213	12.7405	1.45468	6.41355e-06	6.25402e-05	up	-	pfam13424, TPR_12, Tetratricopeptide repeat. 1.72e-07	-	KOG1840, KOG1840, KOG1840, Kinesin light chain [Cytoskeleton]. 2.64e-07	sp|P46825|KLC_DORPE Kinesin light chain OS=Doryteuthis pealeii PE=2 SV=1 7.77e-10	-	XP_020904451.1 uncharacterized protein LOC110242767 isoform X2 [Exaiptasia diaphana] 6.46e-10	-
TRINITY_DN20846_c0_g1	3.08879	15.2884	-2.30732	2.49537e-05	0.000212914	down	-	pfam02567, PhzC-PhzF, Phenazine biosynthesis-like protein. PhzC/PhzF is involved in dimerization of two 2,3-dihydro-3-oxo-anthranilic acid molecules to create PCA by P. fluorescens. This family also contains uncharacterized Mycobacterial proteins, though there is no significant sequence similarity to pfam00303 members. This family appears to be distantly related to pfam01678, including containing…	-	KOG3033, KOG3033, KOG3033, Predicted PhzC/PhzF-type epimerase [General function prediction only]. 1.01e-06	sp|P73125|Y1019_SYNY3 Uncharacterized isomerase slr1019 OS=Synechocystis sp. (strain PCC 6803 / Kazusa) GN=slr1019 PE=3 SV=2 2.23e-14	-	KAF4516325.1 hypothetical protein B566_EDAN000566 [Ephemera danica] 2.63e-15	-
TRINITY_DN13405_c0_g1	1.96584	15.4307	-2.97258	8.38581e-09	1.29614e-07	down	-	-	-	-	-	-	-	-
TRINITY_DN14083_c1_g5	13.1856	33.2942	-1.33631	1.9373e-05	0.000169934	down	-	-	K11272-ko04111 Cell cycle - yeast	-	-	GO:0000070, mitotic sister chromatid segregation;GO:0000075, cell cycle checkpoint;GO:0000076, DNA replication checkpoint;GO:0000077, DNA damage checkpoint;GO:0000217, DNA secondary structure binding;GO:0000228, nuclear chromosome;GO:0000278, mitotic cell cycle;GO:0000280, nuclear division;GO:0000403, Y-form DNA binding;GO:0000405, bubble DNA binding;GO:0000723, telomere maintenance;GO:0000785, c…	-	-
TRINITY_DN14083_c1_g8	0.283879	3.23878	-3.5121	0.00194869	0.0100015	down	-	-	-	-	-	-	-	-
TRINITY_DN12475_c0_g1	19.3348	4.71587	2.0356	3.26732e-07	3.98329e-06	up	cd00833, PKS, polyketide synthases (PKSs) polymerize simple fatty acids into a large variety of different products, called polyketides, by successive decarboxylating Claisen condensations. PKSs can be divided into 2 groups, modular type I PKSs consisting of one or more large multifunctional proteins and iterative type II PKSs, complexes of several monofunctional subunits. 8.00e-06	pfam00109, ketoacyl-synt, Beta-ketoacyl synthase, N-terminal domain. The structure of beta-ketoacyl synthase is similar to that of the thiolase family (pfam00108) and also chalcone synthase. The active site of beta-ketoacyl synthase is located between the N and C-terminal domains. The N-terminal domain contains most of the structures involved in dimer formation and also the active site cysteine. …	-	KOG1202, KOG1202, KOG1202, Animal-type fatty acid synthase and related proteins [Lipid transport and metabolism]. 4.42e-26	sp|Q3S2U6|MOKB_MONPI Lovastatin diketide synthase mokB OS=Monascus pilosus GN=mokB PE=1 SV=1 3.22e-120	-	CAF1243262.1 unnamed protein product, partial [Didymodactylos carnosus] >CAF4007497.1 unnamed protein product, partial [Didymodactylos carnosus] 4.37e-125	-
TRINITY_DN9948_c0_g1	5.64943	51.3097	-3.18305	1.18575e-14	3.64035e-13	down	-	-	-	-	-	-	-	-
TRINITY_DN11606_c0_g1	1.92955	0.632957	1.60809	0.00262466	0.0129092	up	-	-	-	-	sp|D4AXL1|BLML_ARTBC Beta-lactamase-like protein ARB_00930 OS=Arthroderma benhamiae (strain ATCC MYA-4681 / CBS 112371) GN=ARB_00930 PE=1 SV=1 5.30e-10	-	-	-
TRINITY_DN6981_c0_g1	42.2472	19.2682	1.13263	0.000380216	0.00242426	up	cd01285, nucleoside_deaminase, Nucleoside deaminases include adenosine, guanine and cytosine deaminases. These enzymes are Zn dependent and catalyze the deamination of nucleosides. The zinc ion in the active site plays a central role in the proposed catalytic mechanism, activating a water molecule to form a hydroxide ion that performs a nucleophilic attack on the substrate. The functional enzyme …	-	-	KOG1018, KOG1018, KOG1018, Cytosine deaminase FCY1 and related enzymes [Nucleotide transport and metabolism]. 2.07e-13	sp|O94642|TAD2_SCHPO tRNA-specific adenosine deaminase subunit tad2 OS=Schizosaccharomyces pombe (strain 972 / ATCC 24843) GN=tad2 PE=3 SV=2 1.49e-27	GO:0000166, nucleotide binding;GO:0002097, tRNA wobble base modification;GO:0002100, tRNA wobble adenosine to inosine editing;GO:0003674, molecular_function;GO:0003824, catalytic activity;GO:0004000, adenosine deaminase activity;GO:0005488, binding;GO:0005524, ATP binding;GO:0005575, cellular_component;GO:0005622, intracellular;GO:0005623, cell;GO:0005634, nucleus;GO:0005737, cytoplasm;GO:0006139…	KAI0239505.1 tRNA-specific adenosine deaminase 2, partial [Lamellibrachia satsuma] 3.99e-24	-
TRINITY_DN189_c0_g1	0.048875	2.2871	-5.54828	0.00267465	0.0130976	down	-	-	-	-	-	-	-	-
TRINITY_DN8625_c0_g1	2.36281	8.0539	-1.76919	0.00379934	0.017672	down	-	-	-	-	-	-	-	-
TRINITY_DN23425_c0_g1	3.05275	14.7324	-2.27081	8.87833e-05	0.000659232	down	-	-	-	-	-	-	-	-
TRINITY_DN12269_c0_g1	1.16553	3.37127	-1.53231	0.00688652	0.0289475	down	-	pfam03328, HpcH_HpaI, HpcH/HpaI aldolase/citrate lyase family. This family includes 2,4-dihydroxyhept-2-ene-1,7-dioic acid aldolase and 4-hydroxy-2-oxovalerate aldolase. 1.06e-09	-	-	sp|A9N5C4|RHMA_SALPB 2-keto-3-deoxy-L-rhamnonate aldolase OS=Salmonella paratyphi B (strain ATCC BAA-1250 / SPB7) GN=rhmA PE=3 SV=1 5.87e-18	-	MCL4105418.1 hypothetical protein [Idotea baltica] 4.25e-16	-
TRINITY_DN8457_c0_g1	0.431511	7.99225	-4.21113	6.14015e-05	0.000472619	down	-	-	-	-	-	-	-	-
TRINITY_DN11210_c0_g1	9.68859	0.58767	4.04321	3.97845e-13	1.04943e-11	up	cd11060, CYP57A1-like, cytochrome P450 family 57, subfamily A, polypeptide 1 and similar cytochrome P450s. This family is composed of fungal cytochrome P450s including: Nectria haematococca cytochrome P450 57A1 (CYP57A1), also called pisatin demethylase, which detoxifies the phytoalexin pisatin; Penicillium aethiopicum P450 monooxygenase gsfF, also called griseofulvin synthesis protein F, which c…	pfam00067, p450, Cytochrome P450. Cytochrome P450s are haem-thiolate proteins involved in the oxidative degradation of various compounds. They are particularly well known for their role in the degradation of environmental toxins and mutagens. They can be divided into 4 classes, according to the method by which electrons from NAD(P)H are delivered to the catalytic site. Sequence conservation is re…	-	KOG0157, KOG0157, KOG0157, Cytochrome P450 CYP4/CYP19/CYP26 subfamilies [Secondary metabolites biosynthesis, transport and catabolism, Lipid transport and metabolism]. 6.77e-23	sp|D7PI20|GSFF_PENAE Cytochrome P450 momooxygenase gsfF OS=Penicillium aethiopicum GN=gsfF PE=1 SV=2 4.68e-62	-	UPN65119.1 cytochrome P450-1, partial [Laodelphax striatellus] 4.56e-24	-
TRINITY_DN6359_c0_g1	1.30521	0.153204	3.09076	0.00533012	0.0235538	up	-	-	-	-	-	-	-	-
TRINITY_DN11554_c0_g1	36.3296	0.0344357	10.043	4.26884e-20	2.05011e-18	up	cd18833, GH43_PcXyl-like, Glycosyl hydrolase family 43 protein such as the bifunctional Phanerochaete chrysosporium xylosidase/arabinofuranosidase (Xyl;PcXyl). This glycosyl hydrolase family 43 (GH43) subgroup includes Phanerochaete chrysosporium BKM-F-1767 Xyl, a characterized bifunctional enzyme with beta-1,4-xylosidase (beta-D-xylosidase;xylan 1,4-beta-xylosidase; EC 3.2.1.37)/ alpha-L-arabino…	pfam17851, GH43_C2, Beta xylosidase C-terminal Concanavalin A-like domain. This domain is found to the C-terminus of the pfam04616 domain. This domain adopts a concanavalin A-like fold. 5.35e-10	-	-	sp|A7LXU0|GH43B_BACO1 Non-reducing end alpha-L-arabinofuranosidase BoGH43B OS=Bacteroides ovatus (strain ATCC 8483 / DSM 1896 / JCM 5824 / NCTC 11153) GN=BACOVA_02656 PE=1 SV=2 6.13e-16	-	-	-
TRINITY_DN9580_c0_g1	0.946049	15.817	-4.06342	6.41784e-13	1.65011e-11	down	cd06453, SufS_like, Cysteine desulfurase (SufS)-like. This family belongs to the pyridoxal phosphate (PLP)-dependent aspartate aminotransferase superfamily (fold I). The major groups in this CD correspond to cysteine desulfurase (SufS) and selenocysteine lyase. SufS catalyzes the removal of elemental sulfur and selenium atoms from L-cysteine, L-cystine, L-selenocysteine, and L-selenocystine to pr…	-	K20247-ko00340 Histidine metabolism	KOG1549, KOG1549, KOG1549, Cysteine desulfurase NFS1 [Amino acid transport and metabolism]. 9.64e-11	sp|A7UX13|EGT2_NEUCR Hercynylcysteine sulfoxide lyase OS=Neurospora crassa (strain ATCC 24698 / 74-OR23-1A / CBS 708.71 / DSM 1257 / FGSC 987) GN=egt-2 PE=1 SV=1 5.32e-175	GO:0000096, sulfur amino acid metabolic process;GO:0000097, sulfur amino acid biosynthetic process;GO:0003674, molecular_function;GO:0003824, catalytic activity;GO:0006082, organic acid metabolic process;GO:0006520, cellular amino acid metabolic process;GO:0006575, cellular modified amino acid metabolic process;GO:0006577, amino-acid betaine metabolic process;GO:0006578, amino-acid betaine biosyn…	XP_037026235.1 hercynylcysteine sulfoxide lyase-like [Bradysia coprophila] >XP_037026243.1 hercynylcysteine sulfoxide lyase-like [Bradysia coprophila] 5.67e-62	-
TRINITY_DN9176_c0_g2	0.0898863	2.19314	-4.60875	2.17873e-05	0.000189137	down	-	-	-	-	-	-	CAF3807877.1 unnamed protein product [Rotaria sp. Silwood1] >CAF4775400.1 unnamed protein product [Rotaria sp. Silwood1] 7.05e-08	-
TRINITY_DN14377_c0_g1	0.0001	1.04803	-13.3554	0.0019539	0.0100206	down	cd17936, EEXXEc_NFX1, EEXXE-box helicase domain of NFX1. Human NFX1 protein was identified as a protein that represses class II MHC (major histocompatibility complex) gene expression. NFX1 binds a conserved cis-acting element, termed the X-box, in promoters of human class II MHC genes. The Cys-rich region contains several NFX1-type zinc finger domains. Frequently, a R3H domain is present in the C…	pfam13087, AAA_12, AAA domain. This family of domains contain a P-loop motif that is characteristic of the AAA superfamily. Many of the proteins in this family are conjugative transfer proteins. 5.19e-09	-	KOG1807, KOG1807, KOG1807, Helicases [Replication, recombination and repair]. 2.79e-43	sp|Q9P2E3|ZNFX1_HUMAN NFX1-type zinc finger-containing protein 1 OS=Homo sapiens GN=ZNFX1 PE=2 SV=2 2.84e-38	-	XP_018913755.1 PREDICTED: uncharacterized protein LOC109041790, partial [Bemisia tabaci] 3.45e-120	-
TRINITY_DN14000_c1_g1	18.458	8.19142	1.17206	0.000161557	0.00112972	up	cd03369, ABCC_NFT1, ATP-binding cassette domain 2 of NFT1, subfamily C. Domain 2 of NFT1 (New full-length MRP-type transporter 1). NFT1 belongs to the MRP (multidrug resistance-associated protein) family of ABC transporters. Some of the MRP members have five additional transmembrane segments in their N-terminus, but the function of these additional membrane-spanning domains is not clear. The MRP …	pfam00005, ABC_tran, ABC transporter. ABC transporters for a large family of proteins responsible for translocation of a variety of compounds across biological membranes. ABC transporters are the largest family of proteins in many completely sequenced bacteria. ABC transporters are composed of two copies of this domain and two copies of a transmembrane domain pfam00664. These four domains may bel…	-	KOG0054, KOG0054, KOG0054, Multidrug resistance-associated protein/mitoxantrone resistance protein, ABC superfamily [Secondary metabolites biosynthesis, transport and catabolism]. 7.40e-21	sp|Q864R9|MRP1_MACFA Multidrug resistance-associated protein 1 OS=Macaca fascicularis GN=ABCC1 PE=2 SV=1 9.13e-12	-	KAF4526522.1 hypothetical protein B566_EDAN005889 [Ephemera danica] 8.00e-101	-
TRINITY_DN12952_c0_g1	44.2539	146.98	-1.73174	0.000873193	0.00501359	down	-	-	-	-	-	-	-	-
TRINITY_DN10348_c0_g1	85.4565	748.372	-3.13049	2.03679e-18	8.69484e-17	down	-	-	-	-	-	-	-	-
TRINITY_DN7779_c0_g1	0.078974	3.63534	-5.52457	4.68828e-11	9.75903e-10	down	cd07106, ALDH_AldA-AAD23400, Streptomyces aureofaciens putative aldehyde dehydrogenase AldA (AAD23400)-like. Putative aldehyde dehydrogenase, AldA, from Streptomyces aureofaciens (locus AAD23400) and other similar sequences are present in this CD. 4.83e-155	pfam00171, Aldedh, Aldehyde dehydrogenase family. This family of dehydrogenases act on aldehyde substrates. Members use NADP as a cofactor. The family includes the following members: The prototypical members are the aldehyde dehydrogenases EC:1.2.1.3. Succinate-semialdehyde dehydrogenase EC:1.2.1.16. Lactaldehyde dehydrogenase EC:1.2.1.22. Benzaldehyde dehydrogenase EC:1.2.1.28. Methylmalonate-se…	-	KOG2450, KOG2450, KOG2450, Aldehyde dehydrogenase [Energy production and conversion]. 6.34e-102	sp|P40047|ALDH5_YEAST Aldehyde dehydrogenase 5, mitochondrial OS=Saccharomyces cerevisiae (strain ATCC 204508 / S288c) GN=ALD5 PE=1 SV=4 3.61e-90	-	CAB3244060.1 unnamed protein product [Arctia plantaginis] >CAB3253757.1 unnamed protein product [Arctia plantaginis] 5.16e-94	-
TRINITY_DN13759_c0_g6	17.723	7.90972	1.16393	0.000345002	0.00222186	up	-	pfam10340, Say1_Mug180, Steryl acetyl hydrolase. This entry includes budding yeast steryl acetyl hydrolase 1 (Say1) and fission yeast Mug180. Say1 is a a membrane-anchored deacetylase required for the deacetylation of acetylated sterols. It is involved in the resistance to eugenol and pregnenolone toxicity. Mug180 has a role in meiosis. 2.17e-08	-	KOG1515, KOG1515, KOG1515, Arylacetamide deacetylase [Defense mechanisms]. 3.86e-09	sp|O14158|YE76_SCHPO AB hydrolase superfamily protein C4A8.06c OS=Schizosaccharomyces pombe (strain 972 / ATCC 24843) GN=SPAC4A8.06c PE=3 SV=1 4.50e-12	-	CAF1113783.1 unnamed protein product [Adineta ricciae] 5.65e-15	-
TRINITY_DN9070_c0_g1	2.4166	7.5828	-1.64975	0.0121502	0.0460238	down	cd06558, crotonase-like, Crotonase/Enoyl-Coenzyme A (CoA) hydratase superfamily. This superfamily contains a diverse set of enzymes including enoyl-CoA hydratase, napthoate synthase, methylmalonyl-CoA decarboxylase, 3-hydoxybutyryl-CoA dehydratase, and dienoyl-CoA isomerase. Many of these play important roles in fatty acid metabolism. In addition to a conserved structural core and the formation o…	pfam00378, ECH_1, Enoyl-CoA hydratase/isomerase. This family contains a diverse set of enzymes including: enoyl-CoA hydratase, napthoate synthase, carnitate racemase, 3-hydroxybutyryl-CoA dehydratase and dodecanoyl-CoA delta-isomerase. 4.16e-30	-	KOG1680, KOG1680, KOG1680, Enoyl-CoA hydratase [Lipid transport and metabolism]. 9.61e-29	sp|A8ALR7|CAID_CITK8 Carnitinyl-CoA dehydratase OS=Citrobacter koseri (strain ATCC BAA-895 / CDC 4225-83 / SGSC4696) GN=caiD PE=3 SV=1 8.30e-29	-	CAD7661100.1 unnamed protein product, partial [Oppiella nova] >CAG2178236.1 unnamed protein product, partial [Oppiella nova] 1.13e-70	-
TRINITY_DN14139_c0_g2	41.4325	15.4657	1.42169	0.00129771	0.00705065	up	-	-	-	-	-	-	-	-
TRINITY_DN1168_c0_g1	18.7938	4.12731	2.18698	7.97902e-09	1.23896e-07	up	-	-	-	-	-	-	-	-
TRINITY_DN12184_c0_g1	72.6073	207.294	-1.51349	2.85399e-05	0.00024016	down	cd04413, NDPk_I, Nucleoside diphosphate kinase Group I (NDPk_I)-like: NDP kinase domains are present in a large family of structurally and functionally conserved proteins from bacteria to humans that generally catalyze the transfer of gamma-phosphates of a nucleoside triphosphate (NTP) donor onto a nucleoside diphosphate (NDP) acceptor through a phosphohistidine intermediate. The mammalian nm23/N…	pfam00334, NDK, Nucleoside diphosphate kinase. 8.73e-31	-	KOG0888, KOG0888, KOG0888, Nucleoside diphosphate kinase [Nucleotide transport and metabolism]. 1.06e-36	sp|Q7Z8P9|NDK_ASPFU Nucleoside diphosphate kinase OS=Neosartorya fumigata (strain ATCC MYA-4609 / Af293 / CBS 101355 / FGSC A1100) GN=ndk1 PE=3 SV=1 9.86e-55	-	OQV15660.1 Nucleoside diphosphate kinase [Hypsibius exemplaris] 5.00e-38	-
TRINITY_DN8533_c0_g1	42.4734	131.379	-1.62911	1.03531e-05	9.6612e-05	down	-	pfam00180, Iso_dh, Isocitrate/isopropylmalate dehydrogenase. 5.58e-60	K05824-ko01210 2-Oxocarboxylic acid metabolism;ko00300 Lysine biosynthesis;ko01230 Biosynthesis of amino acids	KOG0785, KOG0785, KOG0785, Isocitrate dehydrogenase, alpha subunit [Amino acid transport and metabolism]. 1.33e-71	sp|O14104|LYS12_SCHPO Homoisocitrate dehydrogenase OS=Schizosaccharomyces pombe (strain 972 / ATCC 24843) GN=lys12 PE=1 SV=1 1.36e-151	GO:0003674, molecular_function;GO:0003824, catalytic activity;GO:0005575, cellular_component;GO:0005622, intracellular;GO:0005623, cell;GO:0005737, cytoplasm;GO:0005739, mitochondrion;GO:0006082, organic acid metabolic process;GO:0006520, cellular amino acid metabolic process;GO:0006553, lysine metabolic process;GO:0006807, nitrogen compound metabolic process;GO:0008150, biological_process;GO:000…	XP_039275170.1 homoisocitrate dehydrogenase-like [Nilaparvata lugens] 7.31e-174	-
TRINITY_DN12989_c0_g1	10.4288	449.415	-5.4294	2.51149e-24	1.78688e-22	down	cd03233, ABCG_PDR_domain1, First domain of the pleiotropic drug resistance-like subfamily G of ATP-binding cassette transporters. The pleiotropic drug resistance (PDR) is a well-described phenomenon occurring in fungi and shares several similarities with processes in bacteria and higher eukaryotes. This PDR subfamily represents domain I of its (ABC-IM)2 organization. ABC transporters are a large …	pfam06422, PDR_CDR, CDR ABC transporter. Corresponds to a region of the PDR/CDR subgroup of ABC transporters comprising extracellular loop 3, transmembrane segment 6 and linker region. 4.54e-24	-	KOG0065, KOG0065, KOG0065, Pleiotropic drug resistance proteins (PDR1-15), ABC superfamily [Secondary metabolites biosynthesis, transport and catabolism]. 7.77e-14	sp|O74676|CDR4_CANAX ABC transporter CDR4 OS=Candida albicans GN=CDR4 PE=3 SV=1 7.17e-09	GO:0000166, nucleotide binding;GO:0000322, storage vacuole;GO:0000323, lytic vacuole;GO:0000324, fungal-type vacuole;GO:0000724, double-strand break repair via homologous recombination;GO:0000725, recombinational repair;GO:0003674, molecular_function;GO:0003824, catalytic activity;GO:0004012, phospholipid-translocating ATPase activity;GO:0005215, transporter activity;GO:0005319, lipid transporter…	KAJ3009872.1 hypothetical protein HDU68_002453, partial [Siphonaria sp. JEL0065] 7.43e-104	-
TRINITY_DN3337_c0_g1	3.16695	0.383868	3.04441	0.00720451	0.0300818	up	-	-	-	-	-	-	-	-
TRINITY_DN8114_c0_g1	0.0001	4.46838	-15.4475	2.502e-05	0.000213344	down	-	-	-	-	-	-	-	-
TRINITY_DN6896_c0_g1	16.2439	33.8501	-1.05926	0.00888344	0.0356904	down	cd08297, CAD3, Cinnamyl alcohol dehydrogenases (CAD). These alcohol dehydrogenases are related to the cinnamyl alcohol dehydrogenases (CAD), members of the medium chain dehydrogenase/reductase family. NAD(P)(H)-dependent oxidoreductases are the major enzymes in the interconversion of alcohols and aldehydes, or ketones. Cinnamyl alcohol dehydrogenases (CAD) reduce cinnamaldehydes to cinnamyl alcoh…	pfam08240, ADH_N, Alcohol dehydrogenase GroES-like domain. This is the catalytic domain of alcohol dehydrogenases. Many of them contain an inserted zinc binding domain. This domain has a GroES-like structure. 1.42e-10	-	KOG0023, KOG0023, KOG0023, Alcohol dehydrogenase, class V [Secondary metabolites biosynthesis, transport and catabolism]. 4.45e-28	sp|P07754|ADH3_EMENI Alcohol dehydrogenase 3 OS=Emericella nidulans (strain FGSC A4 / ATCC 38163 / CBS 112.46 / NRRL 194 / M139) GN=alcC PE=3 SV=1 1.77e-39	GO:0000027, ribosomal large subunit assembly;GO:0003674, molecular_function;GO:0005488, binding;GO:0005515, protein binding;GO:0005575, cellular_component;GO:0005622, intracellular;GO:0005623, cell;GO:0005737, cytoplasm;GO:0005829, cytosol;GO:0006996, organelle organization;GO:0008150, biological_process;GO:0009987, cellular process;GO:0016043, cellular component organization;GO:0022607, cellular…	CAF3922951.1 unnamed protein product [Rotaria sp. Silwood1] 1.65e-60	-
TRINITY_DN13170_c0_g1	23.011	179.861	-2.96649	3.65151e-08	5.14694e-07	down	cd07253, GLOD5, Human glyoxalase domain-containing protein 5 and similar proteins. Uncharacterized subfamily of VOC family contains human glyoxalase domain-containing protein 5 and similar proteins. The vicinal oxygen chelate (VOC) superfamily is composed of structurally related proteins with paired beta.alpha.beta.beta.beta motifs that provide a metal coordination environment with two or three o…	pfam00903, Glyoxalase, Glyoxalase/Bleomycin resistance protein/Dioxygenase superfamily. 1.14e-09	-	-	sp|Q9XIG1|U80B1_ARATH Sterol 3-beta-glucosyltransferase UGT80B1 OS=Arabidopsis thaliana GN=UGT80B1 PE=2 SV=1 1.92e-98	-	CAF1110989.1 unnamed protein product [Didymodactylos carnosus] >CAF1182867.1 unnamed protein product [Didymodactylos carnosus] >CAF3878636.1 unnamed protein product [Didymodactylos carnosus] >CAF3947260.1 unnamed protein product [Didymodactylos carnosus] 9.42e-142	-
TRINITY_DN1944_c0_g1	0.447377	5.20457	-3.54022	2.79303e-05	0.000235325	down	-	-	-	-	-	-	-	-
TRINITY_DN9629_c0_g1	0.36617	39.8494	-6.7659	1.17853e-26	9.78249e-25	down	-	pfam03171, 2OG-FeII_Oxy, 2OG-Fe(II) oxygenase superfamily. This family contains members of the 2-oxoglutarate (2OG) and Fe(II)-dependent oxygenase superfamily. This family includes the C-terminal of prolyl 4-hydroxylase alpha subunit. The holoenzyme has the activity EC:1.14.11.2 catalyzing the reaction: Procollagen L-proline + 2-oxoglutarate + O2 <=> procollagen trans- 4-hydroxy-L-proline + succi…	-	KOG0143, KOG0143, KOG0143, Iron/ascorbate family oxidoreductases [Secondary metabolites biosynthesis, transport and catabolism, General function prediction only]. 5.28e-07	sp|D7PHZ1|VRTI_PENAE Oxidoreductase vrtI OS=Penicillium aethiopicum GN=vrtI PE=1 SV=1 2.46e-62	-	CAF1409617.1 unnamed protein product [Adineta steineri] >CAF3938207.1 unnamed protein product [Adineta steineri] 2.72e-22	-
TRINITY_DN7075_c0_g1	64.993	145.587	-1.16353	0.0022872	0.0114982	down	cd16929, HATPase_PDK-like, Histidine kinase-like ATPase domain of pyruvate dehydrogenase kinase, branched-chain alpha-ketoacid dehydrogenase kinase and related domains. This family includes the histidine kinase-like ATPase (HATPase) domains of all four PDK isoforms (pyruvate dehydrogenase kinases 1-4) that have been described in mammals, and other PDKs including Saccharomyces Pkp1p and Pkp2p. PDK…	pfam10436, BCDHK_Adom3, Mitochondrial branched-chain alpha-ketoacid dehydrogenase kinase. Catabolism and synthesis of leucine, isoleucine and valine are finely balanced, allowing the body to make the most of dietary input but removing excesses to prevent toxic build-up of their corresponding keto-acids. This is the butyryl-CoA dehydrogenase, subunit A domain 3, a largely alpha-helical bundle of t…	-	KOG0787, KOG0787, KOG0787, Dehydrogenase kinase [Signal transduction mechanisms]. 3.83e-14	sp|Q9P6P9|PDK_SCHPO [Pyruvate dehydrogenase (acetyl-transferring)] kinase, mitochondrial OS=Schizosaccharomyces pombe (strain 972 / ATCC 24843) GN=pkp1 PE=3 SV=1 8.31e-131	GO:0000166, nucleotide binding;GO:0003674, molecular_function;GO:0003824, catalytic activity;GO:0004672, protein kinase activity;GO:0004740, pyruvate dehydrogenase (acetyl-transferring) kinase activity;GO:0005488, binding;GO:0005524, ATP binding;GO:0005575, cellular_component;GO:0005622, intracellular;GO:0005623, cell;GO:0005737, cytoplasm;GO:0005739, mitochondrion;GO:0005759, mitochondrial matri…	KAJ3031816.1 hypothetical protein HDU68_012322 [Siphonaria sp. JEL0065] 3.69e-122	-
TRINITY_DN12689_c0_g1	0.961403	4.28057	-2.15459	2.90743e-05	0.000243332	down	-	-	-	-	-	-	-	-
TRINITY_DN1397_c0_g1	4.70977	21.1538	-2.16719	6.33717e-05	0.000486948	down	-	pfam03476, MOSC_N, MOSC N-terminal beta barrel domain. This domain is found to the N-terminus of pfam03473. The function of this domain is unknown, however it is predicted to adopt a beta barrel fold. 1.65e-07	-	KOG2362, KOG2362, KOG2362, Uncharacterized Fe-S protein [General function prediction only]. 1.30e-24	sp|P75863|YCBX_ECOLI Uncharacterized protein YcbX OS=Escherichia coli (strain K12) GN=ycbX PE=1 SV=1 1.62e-24	-	KAJ3022044.1 hypothetical protein HDU68_009345 [Siphonaria sp. JEL0065] 4.26e-29	-
TRINITY_DN4919_c0_g1	0.071253	7.08253	-6.63517	6.76828e-06	6.58084e-05	down	cd04077, Peptidases_S8_PCSK9_ProteinaseK_like, Peptidase S8 family domain in ProteinaseK-like proteins. The peptidase S8 or Subtilase clan of proteases have a Asp/His/Ser catalytic triad that is not homologous to trypsin. This CD contains several members of this clan including: PCSK9 (Proprotein convertase subtilisin/kexin type 9), Proteinase_K, Proteinase_T, and other subtilisin-like serine prot…	-	-	KOG1153, KOG1153, KOG1153, Subtilisin-related protease/Vacuolar protease B [Posttranslational modification, protein turnover, chaperones]. 8.37e-20	sp|A1CIA7|ORYZ_ASPCL Alkaline protease 1 OS=Aspergillus clavatus (strain ATCC 1007 / CBS 513.65 / DSM 816 / NCTC 3887 / NRRL 1) GN=alp1 PE=3 SV=1 3.65e-30	-	CAH1792832.1 unnamed protein product [Owenia fusiformis] 1.76e-17	-
TRINITY_DN13412_c0_g3	68.1935	26.5419	1.36136	2.22977e-05	0.000193069	up	sd00006, TPR, Tetratricopeptide repeat. The Tetratricopeptide repeat (TPR) typically contains 34 amino acids and is found in a variety of organisms including bacteria, cyanobacteria, yeast, fungi, plants, and humans. It is present in a variety of proteins including those involved in chaperone, cell-cycle, transcription, and protein transport complexes. The number of TPR motifs varies among protei…	-	-	KOG1840, KOG1840, KOG1840, Kinesin light chain [Cytoskeleton]. 2.11e-15	sp|Q7Z494|NPHP3_HUMAN Nephrocystin-3 OS=Homo sapiens GN=NPHP3 PE=1 SV=1 2.07e-11	-	-	-
TRINITY_DN11227_c0_g1	9.36754	33.2747	-1.82869	2.69904e-05	0.000228407	down	-	pfam01083, Cutinase, Cutinase. 2.97e-14	-	-	sp|Q9Y7G8|CUTI_PYRBR Cutinase OS=Pyrenopeziza brassicae PE=3 SV=1 1.62e-38	-	-	-
TRINITY_DN16343_c0_g1	0.0001	8.71861	-16.4118	0.000807963	0.00468103	down	-	-	-	-	-	-	-	-
TRINITY_DN13641_c0_g4	6.15664	2.34149	1.39472	0.00580547	0.0252478	up	cd06454, KBL_like, KBL_like; this family belongs to the pyridoxal phosphate (PLP)-dependent aspartate aminotransferase superfamily (fold I). The major groups in this CD corresponds to serine palmitoyltransferase (SPT), 5-aminolevulinate synthase (ALAS), 8-amino-7-oxononanoate synthase (AONS), and 2-amino-3-ketobutyrate CoA ligase (KBL). SPT is responsible for the condensation of L-serine with pal…	-	K00652-ko00780 Biotin metabolism	KOG1359, KOG1359, KOG1359, Glycine C-acetyltransferase/2-amino-3-ketobutyrate-CoA ligase [Amino acid transport and metabolism]. 5.03e-29	sp|A1U4B1|BIOF_MARHV 8-amino-7-oxononanoate synthase OS=Marinobacter hydrocarbonoclasticus (strain ATCC 700491 / DSM 11845 / VT8) GN=bioF PE=3 SV=1 2.48e-38	-	XP_037040056.1 8-amino-7-oxononanoate synthase-like [Bradysia coprophila] 1.09e-65	-
TRINITY_DN13641_c0_g5	98.0545	47.131	1.05691	0.000125548	0.000902321	up	cd13986, STKc_16, Catalytic domain of Serine/Threonine Kinase 16. STKs catalyze the transfer of the gamma-phosphoryl group from ATP to serine/threonine residues on protein substrates. STK16 is associated with many names including Myristylated and Palmitylated Serine/threonine Kinase 1 (MPSK1), Kinase related to cerevisiae and thaliana (Krct), and Protein Kinase expressed in day 12 fetal liver (PK…	-	-	KOG2345, KOG2345, KOG2345, Serine/threonine protein kinase/TGF-beta stimulated factor [Transcription, Lipid transport and metabolism, Signal transduction mechanisms]. 7.89e-28	sp|A7F9K1|TRM82_SCLS1 tRNA (guanine-N(7)-)-methyltransferase non-catalytic subunit trm82 OS=Sclerotinia sclerotiorum (strain ATCC 18683 / 1980 / Ss-1) GN=trm82 PE=3 SV=1 1.35e-73	GO:0000166, nucleotide binding;GO:0000322, storage vacuole;GO:0000323, lytic vacuole;GO:0000324, fungal-type vacuole;GO:0000329, fungal-type vacuole membrane;GO:0003674, molecular_function;GO:0003824, catalytic activity;GO:0004672, protein kinase activity;GO:0004674, protein serine/threonine kinase activity;GO:0005488, binding;GO:0005524, ATP binding;GO:0005575, cellular_component;GO:0005622, int…	XP_050418057.1 serine/threonine-protein kinase 16-like [Patella vulgata] >XP_050418058.1 serine/threonine-protein kinase 16-like [Patella vulgata] >XP_050418059.1 serine/threonine-protein kinase 16-like [Patella vulgata] 1.68e-53	-
TRINITY_DN13641_c0_g2	319.776	109.361	1.54796	2.31043e-08	3.34068e-07	up	cd02083, P-type_ATPase_SERCA, sarco/endoplasmic reticulum Ca(2+)-ATPase (SERCA), similar to mammalian ATP2A1-3/SERCA1-3. SERCA is a transmembrane (Ca2+)-ATPase and a major regulator of Ca(2+) homeostasis and contractility in cardiac and skeletal muscle. It re-sequesters cytoplasmic Ca(2+) to the sarco/endoplasmic reticulum store, thereby also terminating Ca(2+)-induced signaling such as in muscle…	pfam14474, RTC4, RTC4-like domain. This presumed domain is found in the RTC4 protein from yeasts. In Saccharomyces cerevisiae, Cdc13 binds telomeric DNA to recruit telomerase and to "cap" chromosome ends. RTC4 was identified in a screen to identify novel proteins and pathways that cap telomeres, or that respond to uncapped telomeres. This domain is also found in proteins that contain a DNA-bindin…	K05853-ko04972 Pancreatic secretion;ko04022 cGMP - PKG signaling pathway;ko04020 Calcium signaling pathway	KOG0202, KOG0202, KOG0202, Ca2+ transporting ATPase [Inorganic ion transport and metabolism]. 0.0	sp|Q7PPA5|ATC1_ANOGA Calcium-transporting ATPase sarcoplasmic/endoplasmic reticulum type OS=Anopheles gambiae GN=Ca-P60A PE=3 SV=5 0.0	-	KAJ3027572.1 hypothetical protein HDU68_003563 [Siphonaria sp. JEL0065] 0.0	PREDICTED: Nomia melanderi calcium-transporting ATPase sarcoplasmic/endoplasmic reticulum type (LOC116424924), transcript variant X12, mRNA 6.28e-45
TRINITY_DN13641_c0_g3	76.5223	161.069	-1.07373	0.0122979	0.0465014	down	-	-	-	-	-	-	-	-
TRINITY_DN10893_c0_g1	9.91051	0.138924	6.1566	5.93231e-20	2.82879e-18	up	cd20305, cupin_OxDC_C, Oxalate decarboxylase (OxDC), C-terminal cupin domain. This model represents the C-terminal cupin domain of oxalate decarboxylase (OxDC; EC 4.1.1.2), a manganese-dependent bicupin that catalyzes the conversion of oxalate to formate and carbon dioxide, utilizing dioxygen as a cofactor. It is evolutionarily related to oxalate oxidase (OxOx or germin; EC 1.2.3.4) which, in con…	pfam00190, Cupin_1, Cupin. This family represents the conserved barrel domain of the 'cupin' superfamily ('cupa' is the Latin term for a small barrel). This family contains 11S and 7S plant seed storage proteins, and germins. Plant seed storage proteins provide the major nitrogen source for the developing plant. 1.67e-07	K01569-ko00630 Glyoxylate and dicarboxylate metabolism	-	sp|D4AKL6|OXDD_ARTBC Probable oxalate decarboxylase ARB_04859 OS=Arthroderma benhamiae (strain ATCC MYA-4681 / CBS 112371) GN=ARB_04859 PE=1 SV=1 4.23e-133	-	CAD7632178.1 unnamed protein product, partial [Medioppia subpectinata] >CAG2112608.1 unnamed protein product, partial [Medioppia subpectinata] 4.17e-39	-
TRINITY_DN3963_c0_g1	19.3787	4.76978	2.02247	1.05394e-06	1.18995e-05	up	cd17487, MFS_MFSD5_like, Major facilitator superfamily domain containing 5 protein. Human major facilitator superfamily domain containing 5 protein (MFSD5) is also called molybdate-anion transporter, or molybdate transporter 2 homolog (MOT2). It acts as an atypical solute carrier (SLC) that mediates high-affinity intracellular uptake of the rare oligo-element molybdenum. It may also play a role i…	pfam05631, MFS_5, Sugar-tranasporters, 12 TM. MFS_5 is a family of sugar-transporters from both prokaryotes and eukaryotes. 2.58e-17	-	KOG4332, KOG4332, KOG4332, Predicted sugar transporter [Carbohydrate transport and metabolism]. 1.42e-22	sp|Q6N075|MFSD5_HUMAN Molybdate-anion transporter OS=Homo sapiens GN=MFSD5 PE=1 SV=2 1.43e-06	-	KAJ3015962.1 Molybdate-anion transporter [Siphonaria sp. JEL0065] 4.25e-31	-
TRINITY_DN2001_c0_g1	261.454	1070	-2.03297	1.86745e-07	2.37574e-06	down	-	-	-	-	-	-	-	-
TRINITY_DN12167_c0_g1	61.4076	180.791	-1.55783	0.00109646	0.00610016	down	-	-	-	-	-	-	-	-
TRINITY_DN12807_c0_g2	2.0186	21.6376	-3.42212	1.35306e-10	2.63308e-09	down	cd19075, AKR_AKR7A1-5, AKR7A family of aldo-keto reductase (AKR). Aflatoxin B1 aldehyde reductase member 1/3 (AKR7A1/AKR7A3/AFAR) from Rattus norvegicus, aflatoxin B1 aldehyde reductase member 2 (AKR7A2/AFAR1/AFAR) and aflatoxin B1 aldehyde reductase member 3 (AKR7A3/AFAR2) from Homo sapiens, aflatoxin B1 aldehyde reductase member 2 (AKR7A2/AFAR2) from Rattus norvegicus, and aflatoxin B1 aldehyde…	pfam00248, Aldo_ket_red, Aldo/keto reductase family. This family includes a number of K+ ion channel beta chain regulatory domains - these are reported to have oxidoreductase activity. 1.46e-23	K15303-ko00980 Metabolism of xenobiotics by cytochrome P450	KOG1575, KOG1575, KOG1575, Voltage-gated shaker-like K+ channel, subunit beta/KCNAB [Energy production and conversion]. 8.50e-19	sp|P38918|ARK73_RAT Aflatoxin B1 aldehyde reductase member 3 OS=Rattus norvegicus GN=Akr7a3 PE=1 SV=2 3.57e-69	-	CAF0784855.1 unnamed protein product [Adineta steineri] >CAF3811568.1 unnamed protein product [Adineta steineri] 1.56e-91	-
TRINITY_DN12807_c0_g1	8.70828	32.281	-1.89022	1.03074e-05	9.63193e-05	down	cd17327, MFS_FEN2_like, Pantothenate transporter FEN2 and similar transporters of the Major Facilitator Superfamily. This family is composed of Saccharomyces cerevisiae pantothenate transporter FEN2 (or fenpropimorph resistance protein 2) and similar proteins from fungi and bacteria including fungal vitamin H transporter, allantoate permease, and high-affinity nicotinic acid transporter, as well …	-	-	KOG2533, KOG2533, KOG2533, Permease of the major facilitator superfamily [Carbohydrate transport and metabolism]. 6.60e-43	sp|Q9US44|YIZG_SCHPO Uncharacterized transporter C1002.16c OS=Schizosaccharomyces pombe (strain 972 / ATCC 24843) GN=SPAC1002.16c PE=3 SV=1 4.95e-49	-	UJR34789.1 hypothetical protein I4U23_027570 [Adineta vaga] 6.81e-65	-
TRINITY_DN14157_c0_g1	28.0571	288.478	-3.36202	3.12492e-16	1.10002e-14	down	-	pfam14124, DUF4291, Domain of unknown function (DUF4291). This family of proteins is functionally uncharacterized. This family of proteins is found in bacteria and eukaryotes. Proteins in this family are typically between 190 and 214 amino acids in length. There are two conserved sequence motifs: VYQAY and RMTW. 1.95e-40	-	-	sp|P10169|CON8_NEUCR Conidiation-specific protein 8 OS=Neurospora crassa (strain ATCC 24698 / 74-OR23-1A / CBS 708.71 / DSM 1257 / FGSC 987) GN=con-8 PE=2 SV=1 3.85e-09	-	KAJ3006955.1 hypothetical protein HDU68_003780 [Siphonaria sp. JEL0065] 9.70e-28	-
TRINITY_DN8898_c0_g1	8.0848	3.18133	1.34558	0.00765477	0.0316719	up	cd05323, ADH_SDR_c_like, insect type alcohol dehydrogenase (ADH)-like, classical (c) SDRs. This subgroup contains insect type ADH, and 15-hydroxyprostaglandin dehydrogenase (15-PGDH) type I; these proteins are classical SDRs. ADH catalyzes the NAD+-dependent oxidation of alcohols to aldehydes/ketones. This subgroup is distinct from the zinc-dependent alcohol dehydrogenases of the medium chain deh…	pfam00106, adh_short, short chain dehydrogenase. This family contains a wide variety of dehydrogenases. 4.99e-13	-	KOG4169, KOG4169, KOG4169, 15-hydroxyprostaglandin dehydrogenase and related dehydrogenases [Lipid transport and metabolism, General function prediction only]. 7.83e-13	sp|P66782|Y1385_MYCBO Uncharacterized oxidoreductase Mb1385 OS=Mycobacterium bovis (strain ATCC BAA-935 / AF2122/97) GN=fabG2 PE=3 SV=1 1.34e-12	-	XP_019729385.1 PREDICTED: 15-hydroxyprostaglandin dehydrogenase [NAD(+)]-like [Hippocampus comes] 5.03e-16	-
TRINITY_DN6907_c0_g1	13.4404	46.2325	-1.78233	0.000262147	0.00174596	down	-	pfam06985, HET, Heterokaryon incompatibility protein (HET). This family represents a conserved region approximately 150 residues long within various heterokaryon incompatibility proteins that seem to be restricted to ascomycete fungi. Genetic differences in specific het genes prevent a viable heterokaryotic fungal cell from being formed by the fusion of filaments from two different wild-type stra…	-	-	sp|Q00808|HETE1_PODAS Vegetative incompatibility protein HET-E-1 OS=Podospora anserina GN=HET-E1 PE=3 SV=1 2.79e-69	-	-	-
TRINITY_DN8180_c0_g1	1.06133	1245.37	-10.1965	6.99852e-70	1.17636e-66	down	-	-	-	-	-	-	-	-
TRINITY_DN13395_c0_g1	4.3431	18.458	-2.08745	0.000119988	0.0008656	down	cd04056, Peptidases_S53, Peptidase domain in the S53 family. Members of the peptidases S53 (sedolisin) family include endopeptidases and exopeptidases sedolisin, kumamolysin, and (PSCP) Pepstatin-insensitive Carboxyl Proteinase. The S53 family contains a catalytic triad Glu/Asp/Ser with an additional acidic residue Asp in the oxyanion hole, similar to that of Asn in subtilisin. The stability of t…	pfam09286, Pro-kuma_activ, Pro-kumamolisin, activation domain. Members of this family are found in various subtilase propeptides, and adopt a ferredoxin-like fold, with an alpha+beta sandwich. Cleavage of the domain results in activation of the peptide. 9.64e-24	K01279-ko04142 Lysosome	-	sp|Q8NK92|AORSN_ASPOR Aorsin OS=Aspergillus oryzae (strain ATCC 42149 / RIB 40) GN=aorO PE=1 SV=2 0.0	GO:0003674, molecular_function;GO:0003824, catalytic activity;GO:0004175, endopeptidase activity;GO:0004252, serine-type endopeptidase activity;GO:0005575, cellular_component;GO:0005576, extracellular region;GO:0006508, proteolysis;GO:0006807, nitrogen compound metabolic process;GO:0008150, biological_process;GO:0008152, metabolic process;GO:0008233, peptidase activity;GO:0008236, serine-type pep…	CAF1278684.1 unnamed protein product [Adineta steineri] >CAF1561852.1 unnamed protein product [Adineta steineri] 2.02e-125	-
TRINITY_DN13948_c0_g2	85.834	329.976	-1.94274	0.00216307	0.0109679	down	-	-	-	-	-	-	-	-
TRINITY_DN65_c0_g1	42.5482	4.35038	3.28988	1.17956e-14	3.62963e-13	up	cd08273, MDR8, Medium chain dehydrogenases/reductase (MDR)/zinc-dependent alcohol dehydrogenase-like family. This group is a member of the medium chain dehydrogenases/reductase (MDR)/zinc-dependent alcohol dehydrogenase-like family, but lacks the zinc-binding sites of the zinc-dependent alcohol dehydrogenases. The medium chain dehydrogenases/reductase (MDR)/zinc-dependent alcohol dehydrogenase-li…	-	-	KOG1197, KOG1197, KOG1197, Predicted quinone oxidoreductase [Energy production and conversion, General function prediction only]. 1.25e-28	sp|P34055|INC11_HYPAT Protein indc11 OS=Hypocrea atroviridis GN=indc11 PE=2 SV=1 4.74e-115	-	XP_020781932.1 synaptic vesicle membrane protein VAT-1 homolog [Boleophthalmus pectinirostris] 9.79e-38	-
TRINITY_DN11632_c0_g1	5.90822	66.9438	-3.50216	8.58723e-20	4.06593e-18	down	-	-	-	-	-	-	-	-
TRINITY_DN13220_c0_g3	4.9429	1.3346	1.88895	0.00203299	0.0103906	up	-	-	-	-	-	-	-	-
TRINITY_DN13220_c0_g2	0.175414	4.13975	-4.56071	2.0507e-07	2.59399e-06	down	cd08771, DLP_1, Dynamin_like protein family includes dynamins and Mx proteins. The dynamin family of large mechanochemical GTPases includes the classical dynamins and dynamin-like proteins (DLPs) that are found throughout the Eukarya. These proteins catalyze membrane fission during clathrin-mediated endocytosis. Dynamin consists of five domains; an N-terminal G domain that binds and hydrolyzes GT…	pfam00350, Dynamin_N, Dynamin family. 2.06e-15	-	KOG0446, KOG0446, KOG0446, Vacuolar sorting protein VPS1, dynamin, and related proteins [Intracellular trafficking, secretion, and vesicular transport, General function prediction only]. 2.87e-29	sp|Q2KTC2|MX_DICLA Interferon-induced GTP-binding protein Mx OS=Dicentrarchus labrax GN=mx PE=2 SV=2 1.47e-39	-	XP_027202792.1 dynamin-A-like [Dermatophagoides pteronyssinus] 8.27e-40	-
TRINITY_DN25677_c0_g1	14.2821	1.91253	2.90066	8.99022e-09	1.38004e-07	up	cd13929, PT-DMATS_CymD, aromatic prenyltransferases (PTases) of the DMATS/CymD familiy. Members of the DMATS/CymD family of ABBA prenyltransferases prenylate indole, tyrosine, and xanthone derivatives. This family of fungal proteins includes cyclic dipeptide N-prenyltransferase (CdpNPT), Brevianamide F prenyltransferase (ftmPT1), fumigaclavine C synthase (FgaPT1), dimethylallyltryptophan synthase…	pfam11991, Trp_DMAT, Tryptophan dimethylallyltransferase. This family of proteins represents tryptophan dimethylallyltransferase (EC:2.5.1.34), which catalyzes the first step of ergot alkaloid biosynthesis. Ergot alkaloids, which are produced by endophyte fungi, can enhance plant host fitness, but also cause livestock toxicosis to host plants. This protein is found in bacteria and eukaryotes. Pro…	-	-	sp|Q6Q874|SIRD_LEPMC 4-O-dimethylallyl-L-tyrosine synthase OS=Leptosphaeria maculans GN=sirD PE=1 SV=1 1.00e-56	GO:0008150, biological_process;GO:0008152, metabolic process;GO:0009058, biosynthetic process;GO:0019748, secondary metabolic process;GO:0044550, secondary metabolite biosynthetic process	-	-
TRINITY_DN13697_c0_g1	303.874	19.1435	3.98854	0.000112788	0.000819374	up	cd05918, A_NRPS_SidN3_like, The adenylation (A) domain of siderophore-synthesizing nonribosomal peptide synthetases (NRPS). The adenylation (A) domain of NRPS recognizes a specific amino acid or hydroxy acid and activates it as an (amino) acyl adenylate by hydrolysis of ATP. The activated acyl moiety then forms a thioester to the enzyme-bound cofactor phosphopantetheine of a peptidyl carrier prot…	pfam00501, AMP-binding, AMP-binding enzyme. 3.67e-11	-	KOG1178, KOG1178, KOG1178, Non-ribosomal peptide synthetase/alpha-aminoadipate reductase and related enzymes [Secondary metabolites biosynthesis, transport and catabolism]. 7.09e-08	sp|E9FCP4|DTXS1_METRA Nonribosomal peptide synthetase dtxS1 OS=Metarhizium robertsii (strain ARSEF 23 / ATCC MYA-3075) GN=dtxS1 PE=1 SV=2 4.45e-08	-	XP_031624485.1 uncharacterized protein LOC116341514 [Contarinia nasturtii] 0.0	-
TRINITY_DN10067_c0_g1	0.456484	5.09482	-3.4804	3.06072e-05	0.000255003	down	-	-	-	-	-	-	-	-
TRINITY_DN13981_c0_g1	312.807	941.968	-1.59041	0.000267753	0.00177977	down	cd08233, butanediol_DH_like, (2R,3R)-2,3-butanediol dehydrogenase. (2R,3R)-2,3-butanediol dehydrogenase, a zinc-dependent medium chain alcohol dehydrogenase, catalyzes the NAD(+)-dependent oxidation of (2R,3R)-2,3-butanediol and meso-butanediol to acetoin. BDH functions as a homodimer. NAD(P)(H)-dependent oxidoreductases are the major enzymes in the interconversion of alcohols and aldehydes, or k…	pfam08240, ADH_N, Alcohol dehydrogenase GroES-like domain. This is the catalytic domain of alcohol dehydrogenases. Many of them contain an inserted zinc binding domain. This domain has a GroES-like structure. 2.08e-15	-	KOG0024, KOG0024, KOG0024, Sorbitol dehydrogenase [Secondary metabolites biosynthesis, transport and catabolism]. 7.02e-37	sp|Q870L2|MIRB_EMENI Siderophore iron transporter mirB OS=Emericella nidulans (strain FGSC A4 / ATCC 38163 / CBS 112.46 / NRRL 194 / M139) GN=mirB PE=3 SV=1 1.15e-98	-	KAI1692650.1 alcohol dehydrogenase groES-like domain-containing protein [Ditylenchus destructor] 3.05e-40	-
TRINITY_DN9853_c0_g1	1315.75	149.116	3.14138	8.36367e-13	2.13004e-11	up	-	-	-	-	-	-	-	-
TRINITY_DN9881_c0_g1	23.9704	6.2767	1.93318	1.06996e-06	1.204e-05	up	-	-	-	-	-	-	-	-
TRINITY_DN11082_c0_g1	9.10429	3.17872	1.5181	3.60714e-05	0.000295044	up	-	-	-	-	-	-	-	-
TRINITY_DN12996_c0_g1	97.9544	17.9817	2.44558	7.34998e-12	1.66389e-10	up	-	pfam11374, DUF3176, Protein of unknown function (DUF3176). This eukaryotic family of proteins has no known function. 3.73e-30	-	-	-	-	-	-
TRINITY_DN10875_c0_g1	16.8307	3.14427	2.4203	6.77084e-09	1.0624e-07	up	-	-	-	-	sp|O23024|YUC3_ARATH Probable indole-3-pyruvate monooxygenase YUCCA3 OS=Arabidopsis thaliana GN=YUC3 PE=2 SV=1 9.39e-23	-	XP_021943406.1 baeyer-Villiger monooxygenase [Folsomia candida] >OXA63916.1 Baeyer-Villiger monooxygenase [Folsomia candida] 1.01e-12	-
TRINITY_DN8780_c0_g1	1.31995	16.0022	-3.59971	1.26225e-16	4.6017e-15	down	-	-	-	-	sp|Q00808|HETE1_PODAS Vegetative incompatibility protein HET-E-1 OS=Podospora anserina GN=HET-E1 PE=3 SV=1 3.64e-14	-	-	-
TRINITY_DN13037_c0_g1	1.67507	26.5321	-3.98544	2.06209e-13	5.61313e-12	down	cd09008, MTAN, 5'-methylthioadenosine/S-adenosylhomocysteine nucleosidases. This subfamily includes both bacterial and plant 5'-methylthioadenosine/S-adenosylhomocysteine (MTA/SAH) nucleosidases (MTANs): bacterial MTANs show comparable efficiency in hydrolyzing MTA and SAH, while plant enzymes are highly specific for MTA and are unable to metabolize SAH or show significantly reduced activity towa…	-	-	-	-	-	KAI1694588.1 phosphorylase superfamily domain-containing protein [Ditylenchus destructor] 7.19e-83	-
TRINITY_DN9468_c0_g1	14.0494	30.9714	-1.14043	0.0130001	0.0486807	down	-	-	-	-	-	-	-	-
TRINITY_DN9812_c0_g1	0.0470693	2.90926	-5.94972	0.00038151	0.00243135	down	-	-	-	-	-	-	-	-
TRINITY_DN8129_c0_g1	4.97487	1.51331	1.71695	0.00480949	0.0215506	up	cd03324, rTSbeta_L-fuconate_dehydratase, Human rTS beta is encoded by the rTS gene which, through alternative RNA splicing, also encodes rTS alpha whose mRNA is complementary to thymidylate synthase mRNA. rTS beta expression is associated with the production of small molecules that appear to mediate the down-regulation of thymidylate synthase protein by a novel intercellular signaling mechanism. …	pfam13378, MR_MLE_C, Enolase C-terminal domain-like. This domain appears at the C-terminus of many of the proteins that carry the MR_MLE_N pfam02746 domain. EC:4.2.1.40. 7.30e-30	K18102-ko00040 Pentose and glucuronate interconversions	-	sp|Q0QWS4|LGD1_HYPJE L-galactonate dehydratase OS=Hypocrea jecorina GN=lgd1 PE=1 SV=1 0.0	-	XP_029639990.1 mitochondrial enolase superfamily member 1-like [Octopus sinensis] 5.99e-179	-
TRINITY_DN11046_c0_g1	87.2736	259.654	-1.57298	5.3961e-06	5.35113e-05	down	cd05353, hydroxyacyl-CoA-like_DH_SDR_c-like, (3R)-hydroxyacyl-CoA dehydrogenase-like, classical(c)-like SDRs. Beta oxidation of fatty acids in eukaryotes occurs by a four-reaction cycle, that may take place in mitochondria or in peroxisomes. (3R)-hydroxyacyl-CoA dehydrogenase is part of rat peroxisomal multifunctional MFE-2, it is a member of the NAD-dependent SDRs, but contains an additional sma…	pfam00106, adh_short, short chain dehydrogenase. This family contains a wide variety of dehydrogenases. 6.66e-23	-	KOG1206, KOG1206, KOG1206, Peroxisomal multifunctional beta-oxidation protein and related enzymes [Lipid transport and metabolism]. 6.45e-74	sp|Q01373|FOX2_NEUCR Peroxisomal hydratase-dehydrogenase-epimerase OS=Neurospora crassa (strain ATCC 24698 / 74-OR23-1A / CBS 708.71 / DSM 1257 / FGSC 987) GN=fox-2 PE=1 SV=1 9.36e-10	-	KAJ3026460.1 hypothetical protein HDU68_005635 [Siphonaria sp. JEL0065] 1.10e-295	-
TRINITY_DN7884_c0_g1	25.0862	50.8285	-1.01874	0.0102355	0.0400923	down	cd07993, LPLAT_DHAPAT-like, Lysophospholipid Acyltransferases (LPLATs) of Glycerophospholipid Biosynthesis: GPAT-like. Lysophospholipid acyltransferase (LPLAT) superfamily member: acyltransferases of de novo and remodeling pathways of glycerophospholipid biosynthesis which catalyze the incorporation of an acyl group from either acylCoAs or acyl-acyl carrier proteins (acylACPs) into acceptors such…	-	-	KOG3729, KOG3729, KOG3729, Mitochondrial glycerol-3-phosphate acyltransferase GPAT [Lipid transport and metabolism]. 1.24e-47	sp|O15228|GNPAT_HUMAN Dihydroxyacetone phosphate acyltransferase OS=Homo sapiens GN=GNPAT PE=1 SV=1 2.35e-46	-	KAJ3014148.1 hypothetical protein HDU68_000404 [Siphonaria sp. JEL0065] 3.46e-178	-
TRINITY_DN14068_c0_g2	0.375024	2.40517	-2.68108	0.0134128	0.0498788	down	-	-	-	-	-	-	-	-
TRINITY_DN14362_c0_g1	0.654385	79.1923	-6.91908	1.18476e-36	1.8104e-34	down	cd21175, LPMO_AA9, lytic polysaccharide monooxygenase (LPMO) auxiliary activity family 9 (AA9). AA9 proteins are copper-dependent lytic polysaccharide monooxygenases (LPMOs) involved in the cleavage of cellulose chains with oxidation of carbons C1 and/or C4 and C6. Activities include lytic cellulose monooxygenase (C1-hydroxylating) (EC 1.14.99.54) and lytic cellulose monooxygenase (C4-dehydrogena…	pfam03443, Glyco_hydro_61, Glycosyl hydrolase family 61. Although weak endoglucanase activity has been demonstrated in several members of this family, they lack the clustered conserved catalytic acidic amino acids present in most glycoside hydrolases. Many members of this family lack measurable cellulase activity on their own, but enhance the activity of other cellulolytic enzymes. They are there…	K19356-ko00500 Starch and sucrose metabolism	-	sp|G2Q9T3|CEL61_MYCTT Polysaccharide monooxygenase Cel61a OS=Myceliophthora thermophila (strain ATCC 42464 / BCRC 31852 / DSM 1799) GN=Cel61a PE=1 SV=1 1.05e-94	-	CAF0965746.1 unnamed protein product [Adineta steineri] >CAF4136179.1 unnamed protein product [Adineta steineri] 3.27e-10	-
TRINITY_DN8873_c0_g1	0.0001	1.75644	-14.1004	6.87789e-06	6.67294e-05	down	-	-	-	-	-	-	-	-
TRINITY_DN13328_c0_g1	8.56119	22.3889	-1.3869	0.00022425	0.00152067	down	cd08662, M13, Peptidase family M13 includes neprilysin and endothelin-converting enzyme I. The M13 family of metallopeptidases includes neprilysin (neutral endopeptidase, NEP, enkephalinase, CD10, CALLA, EC 3.4.24.11), endothelin-converting enzyme I (ECE-1, EC 3.4.24.71), erythrocyte surface antigen KELL (ECE-3), phosphate-regulating gene on the X chromosome (PHEX), soluble secreted endopeptidase…	pfam01431, Peptidase_M13, Peptidase family M13. Mammalian enzymes are typically type-II membrane anchored enzymes which are known, or believed to activate or inactivate oligopeptide (pro)-hormones such as opioid peptides. The family also contains a bacterial member believed to be involved with milk protein cleavage. 1.00e-51	-	KOG2426, KOG2426, KOG2426, Dihydroxyacetone kinase/glycerone kinase [Carbohydrate transport and metabolism]. 2.90e-114	sp|O60017|DAK_PICAN Dihydroxyacetone kinase OS=Pichia angusta GN=DAK PE=3 SV=1 1.99e-116	-	XP_050787173.1 endothelin-converting enzyme 1 isoform X3 [Gopherus flavomarginatus] 1.12e-113	-
TRINITY_DN20935_c0_g1	0.0368683	2.01906	-5.77516	0.000181766	0.00125731	down	cd05120, APH_ChoK_like, Aminoglycoside 3'-phosphotransferase and Choline Kinase family. This family is composed of APH, ChoK, ethanolamine kinase (ETNK), macrolide 2'-phosphotransferase (MPH2'), an unusual homoserine kinase, and uncharacterized proteins with similarity to the N-terminal domain of acyl-CoA dehydrogenase 10 (ACAD10). The members of this family catalyze the transfer of the gamma-pho…	-	-	-	-	-	-	-
TRINITY_DN8527_c0_g1	0.884121	3.63629	-2.04015	0.0080521	0.0329509	down	-	pfam07944, Glyco_hydro_127, Beta-L-arabinofuranosidase, GH127. One member of this family, from Bidobacterium longicum, UniProtKB:E8MGH8, has been characterized as an unusual beta-L-arabinofuranosidase enzyme, EC:3.2.1.185. It rleases l-arabinose from the l-arabinofuranose (Araf)-beta1,2-Araf disaccharide and also transglycosylates 1-alkanols with retention of the anomeric configuration. Terminal …	-	-	sp|E8MGH8|HYBA1_BIFL2 Non-reducing end beta-L-arabinofuranosidase OS=Bifidobacterium longum subsp. longum (strain ATCC 15707 / DSM 20219 / JCM 1217 / NCTC 11818 / E194b) GN=hypBA1 PE=1 SV=1 1.91e-66	-	-	-
TRINITY_DN16617_c0_g1	0.0001	2.16383	-14.4013	0.000851338	0.00490486	down	-	pfam11807, DUF3328, Domain of unknown function (DUF3328). This family of proteins are functionally uncharacterized. This family is only found in eukaryotes. 1.81e-16	-	-	-	-	-	-
TRINITY_DN10778_c0_g1	0.257801	52.4259	-7.66788	4.01227e-10	7.43155e-09	down	-	-	-	-	sp|D4AY86|LYSM6_ARTBC LysM domain-containing protein ARB_01155/01156 OS=Arthroderma benhamiae (strain ATCC MYA-4681 / CBS 112371) GN=ARB_01155/01156 PE=3 SV=2 7.85e-55	-	-	-
TRINITY_DN13991_c1_g3	8.66548	44.2749	-2.35314	5.55887e-10	1.01287e-08	down	-	-	-	-	-	-	-	-
TRINITY_DN12321_c0_g1	10.6283	53.4696	-2.3308	4.41165e-10	8.12649e-09	down	cd02076, P-type_ATPase_H, plant and fungal plasma membrane H(+)-ATPases, and related bacterial and archaeal putative H(+)-ATPases. This subfamily includes eukaryotic plasma membrane H(+)-ATPase which transports H(+) from the cytosol to the extracellular space, thus energizing the plasma membrane for the uptake of ions and nutrients, and is expressed in plants and fungi. This H(+)-ATPase consists …	pfam08546, ApbA_C, Ketopantoate reductase PanE/ApbA C terminal. This is a family of 2-dehydropantoate 2-reductases also known as ketopantoate reductases, EC:1.1.1.169. The reaction catalyzed by this enzyme is: (R)-pantoate + NADP(+) <=> 2-dehydropantoate + NADPH. AbpA catalyzes the NADPH reduction of ketopantoic acid to pantoic acid in the alternative pyrimidine biosynthetic (APB) pathway. ApbA a…	K01535-ko00190 Oxidative phosphorylation	KOG0205, KOG0205, KOG0205, Plasma membrane H+-transporting ATPase [Inorganic ion transport and metabolism]. 1.07e-12	sp|P19657|PMA2_YEAST Plasma membrane ATPase 2 OS=Saccharomyces cerevisiae (strain ATCC 204508 / S288c) GN=PMA2 PE=1 SV=3 0.0	-	KAJ3020750.1 hypothetical protein HDU68_009987 [Siphonaria sp. JEL0065] 9.24e-125	-
TRINITY_DN11460_c0_g1	1.67009	10.8412	-2.69854	1.15256e-10	2.26255e-09	down	-	-	-	-	-	-	UJR29540.1 hypothetical protein I4U23_010757 [Adineta vaga] 2.80e-29	-
TRINITY_DN7062_c0_g1	0.11318	2.65991	-4.55468	7.31584e-06	7.05205e-05	down	-	pfam02129, Peptidase_S15, X-Pro dipeptidyl-peptidase (S15 family). 1.94e-27	-	-	sp|Q9L9D7|COCE_RHOSM Cocaine esterase OS=Rhodococcus sp. (strain MB1 Bresler) GN=cocE PE=1 SV=1 1.05e-13	-	CAF4023904.1 unnamed protein product [Adineta steineri] 4.96e-116	-
TRINITY_DN1648_c0_g1	2.31937	0.451789	2.36001	0.00270333	0.013214	up	-	-	-	-	-	-	-	-
TRINITY_DN7378_c0_g1	0.253111	1.25884	-2.31426	0.0114233	0.0437882	down	sd00045, ANK, ankyrin repeats. Ankyrin repeats are one of the most abundant repeat motifs, and generally function as scaffolds for protein-protein interactions in processes including cell cycle, transcriptional regulation, signal transduction, vesicular trafficking, and inflammatory response. Although predominantly found in eukaryotic proteins, they are also found in some bacterial and viral prot…	pfam12796, Ank_2, Ankyrin repeats (3 copies). 8.72e-08	-	KOG4177, KOG4177, KOG4177, Ankyrin [Cell wall/membrane/envelope biogenesis]. 1.05e-08	sp|O75179|ANR17_HUMAN Ankyrin repeat domain-containing protein 17 OS=Homo sapiens GN=ANKRD17 PE=1 SV=3 2.41e-06	-	-	-
TRINITY_DN4200_c0_g1	13.0336	1.58783	3.03711	4.79227e-09	7.6534e-08	up	-	-	-	-	-	-	-	-
TRINITY_DN11594_c0_g1	1.18756	103.886	-6.45087	6.06872e-44	1.48375e-41	down	cd08157, catalase_fungal, Fungal catalases similar to yeast catalases A and T. Catalase is a ubiquitous enzyme found in both prokaryotes and eukaryotes, which is involved in the protection of cells from the toxic effects of peroxides. It catalyzes the conversion of hydrogen peroxide to water and molecular oxygen. Catalases also utilize hydrogen peroxide to oxidize various substrates such as alcoh…	pfam00199, Catalase, Catalase. 9.19e-10	K03781-ko04011 MAPK signaling pathway - yeast;ko01200 Carbon metabolism;ko00630 Glyoxylate and dicarboxylate metabolism;ko04212 Longevity regulating pathway - worm;ko04211 Longevity regulating pathway - mammal;ko04146 Peroxisome;ko00380 Tryptophan metabolism;ko04213 Longevity regulating pathway - multiple species;ko04068 FoxO signaling pathway	KOG0047, KOG0047, KOG0047, Catalase [Inorganic ion transport and metabolism]. 2.98e-118	sp|O13289|CATA_CANAL Peroxisomal catalase OS=Candida albicans (strain SC5314 / ATCC MYA-2876) GN=CTA1 PE=2 SV=4 1.05e-126	GO:0000302, response to reactive oxygen species;GO:0001306, age-dependent response to oxidative stress;GO:0001315, age-dependent response to reactive oxygen species;GO:0003674, molecular_function;GO:0003824, catalytic activity;GO:0004096, catalase activity;GO:0004601, peroxidase activity;GO:0005488, binding;GO:0005575, cellular_component;GO:0005618, cell wall;GO:0005622, intracellular;GO:0005623,…	VEN55345.1 unnamed protein product, partial [Callosobruchus maculatus] 1.00e-112	-
TRINITY_DN14060_c3_g1	28.5387	13.9867	1.02886	0.00272971	0.0133236	up	cd06629, STKc_Bck1_like, Catalytic domain of the Serine/Threonine Kinases, fungal Bck1-like Mitogen-Activated Protein Kinase Kinase Kinases. STKs catalyze the transfer of the gamma-phosphoryl group from ATP to serine/threonine residues on protein substrates. Members of this group include the MAPKKKs Saccharomyces cerevisiae Bck1 and Schizosaccharomyces pombe Mkh1, and related proteins. Budding ye…	pfam07714, Pkinase_Tyr, Protein tyrosine kinase. 7.66e-29	K11229-ko04011 MAPK signaling pathway - yeast;ko04139 Regulation of mitophagy - yeast	KOG0198, KOG0198, KOG0198, MEKK and related serine/threonine protein kinases [Signal transduction mechanisms]. 1.90e-58	sp|Q10407|MKH1_SCHPO MAP kinase kinase kinase mkh1 OS=Schizosaccharomyces pombe (strain 972 / ATCC 24843) GN=mkh1 PE=3 SV=1 5.17e-114	GO:0000165, MAPK cascade;GO:0000166, nucleotide binding;GO:0000186, activation of MAPKK activity;GO:0000935, division septum;GO:0001932, regulation of protein phosphorylation;GO:0001934, positive regulation of protein phosphorylation;GO:0003674, molecular_function;GO:0003824, catalytic activity;GO:0004672, protein kinase activity;GO:0004674, protein serine/threonine kinase activity;GO:0004709, MA…	KAJ3010108.1 hypothetical protein HDU68_002326 [Siphonaria sp. JEL0065] 8.75e-60	-
TRINITY_DN14060_c3_g2	73.1831	237.763	-1.69994	6.37304e-06	6.22355e-05	down	-	pfam08689, Med5, Mediator complex subunit Med5. The mediator complex is required for the expression of nearly all RNA pol II dependent genes in Saccharomyces cerevisiae. Deletion of the MED5 gene leads to increased transcription of nuclear genes encoding components of the oxidative phosphorylation machinery, and decreased transcription of mitochondrial genes encoding components of the same machin…	-	-	sp|Q1E024|MED5_COCIM Mediator of RNA polymerase II transcription subunit 5 OS=Coccidioides immitis (strain RS) GN=NUT1 PE=3 SV=2 1.02e-158	GO:0005575, cellular_component;GO:0005622, intracellular;GO:0005623, cell;GO:0005634, nucleus;GO:0005654, nucleoplasm;GO:0005737, cytoplasm;GO:0005739, mitochondrion;GO:0006139, nucleobase-containing compound metabolic process;GO:0006351, transcription, DNA-templated;GO:0006355, regulation of transcription, DNA-templated;GO:0006357, regulation of transcription by RNA polymerase II;GO:0006366, tra…	XP_039301569.1 LOW QUALITY PROTEIN: mediator of RNA polymerase II transcription subunit 5-like [Nilaparvata lugens] 5.11e-185	-
TRINITY_DN10255_c0_g1	36.2757	77.3011	-1.09149	0.0106111	0.041275	down	-	-	-	KOG1110, KOG1110, KOG1110, Putative steroid membrane receptor Hpr6.6/25-Dx [General function prediction only]. 1.56e-08	sp|Q9SK39|SBP3_ARATH Probable steroid-binding protein 3 OS=Arabidopsis thaliana GN=MP3 PE=1 SV=1 1.29e-11	-	-	-
TRINITY_DN14020_c0_g1	248.648	5.31826	5.54701	1.14994e-37	1.98246e-35	up	cd17358, MFS_GLUT6_8_Class3_like, Glucose transporter (GLUT) types 6 and 8, Class 3 GLUTs, and similar transporters of the Major Facilitator Superfamily. This subfamily is composed of glucose transporter type 6 (GLUT6), GLUT8, plant early dehydration-induced gene ERD6-like proteins, and similar insect proteins including facilitated trehalose transporter Tret1-1. GLUTs, also called Solute carrier …	pfam00083, Sugar_tr, Sugar (and other) transporter. 3.69e-69	K00276-ko00410 beta-Alanine metabolism;ko00260 Glycine, serine and threonine metabolism;ko00950 Isoquinoline alkaloid biosynthesis;ko00360 Phenylalanine metabolism;ko00960 Tropane, piperidine and pyridine alkaloid biosynthesis;ko00350 Tyrosine metabolism	KOG0254, KOG0254, KOG0254, Predicted transporter (major facilitator superfamily) [General function prediction only]. 1.42e-70	sp|Q6MYX6|QUTD_ASPFU Probable quinate permease OS=Neosartorya fumigata (strain ATCC MYA-4609 / Af293 / CBS 101355 / FGSC A1100) GN=qutD PE=3 SV=1 4.41e-89	-	XP_044173730.1 amiloride-sensitive amine oxidase [copper-containing]-like [Acropora millepora] 1.24e-95	-
TRINITY_DN4358_c0_g1	5.95988	32.92	-2.46561	2.52337e-07	3.15351e-06	down	-	pfam00300, His_Phos_1, Histidine phosphatase superfamily (branch 1). The histidine phosphatase superfamily is so named because catalysis centers on a conserved His residue that is transiently phosphorylated during the catalytic cycle. Other conserved residues contribute to a 'phosphate pocket' and interact with the phospho group of substrate before, during and after its transfer to the His residu…	-	KOG4754, KOG4754, KOG4754, Predicted phosphoglycerate mutase [Carbohydrate transport and metabolism]. 1.41e-06	sp|Q9FGF0|PGML1_ARATH Phosphoglycerate mutase-like protein 1 OS=Arabidopsis thaliana GN=At5g64460 PE=2 SV=1 1.00e-07	-	-	-
TRINITY_DN13330_c0_g1	30.1729	7.47563	2.01299	7.38659e-11	1.4914e-09	up	-	-	-	-	-	-	CAF1173199.1 unnamed protein product [Adineta steineri] >CAF1404202.1 unnamed protein product [Adineta steineri] 3.95e-28	-
TRINITY_DN13260_c2_g2	25.7324	93.7234	-1.86482	1.536e-06	1.68197e-05	down	-	-	-	-	-	-	-	-
TRINITY_DN10776_c0_g1	1.64551	0.133202	3.62685	0.00398141	0.0183916	up	-	-	-	-	-	-	-	-
TRINITY_DN12235_c0_g1	14.3554	5.81734	1.30316	0.00010476	0.000764356	up	-	pfam04479, RTA1, RTA1 like protein. This family is comprised of fungal proteins with multiple transmembrane regions. RTA1 is involved in resistance to 7-aminocholesterol, while RTM1 confers resistance to an an unknown toxic chemical in molasses. These proteins may bind to the toxic substance, and thus prevent toxicity. They are not thought to be involved in the efflux of xenobiotics. 7.67e-34	-	-	sp|P53047|RTA1_YEAST Protein RTA1 OS=Saccharomyces cerevisiae (strain ATCC 204508 / S288c) GN=RTA1 PE=1 SV=1 1.80e-42	-	CAF1323417.1 unnamed protein product [Adineta ricciae] 4.15e-36	-
TRINITY_DN13033_c0_g1	218.344	88.0459	1.31027	6.82094e-06	6.62247e-05	up	-	-	-	-	sp|Q7D9A2|Y0809_MYCTO KsdD-like steroid dehydrogenase MT0809 OS=Mycobacterium tuberculosis (strain CDC 1551 / Oshkosh) GN=MT0809 PE=3 SV=1 1.14e-30	-	MCL4120990.1 hypothetical protein [Idotea baltica] 2.57e-156	-
TRINITY_DN14088_c0_g1	333.104	760.799	-1.19154	0.0050869	0.0226396	down	-	pfam00838, TCTP, Translationally controlled tumor protein. 2.00e-23	K04713-ko00600 Sphingolipid metabolism	KOG0874, KOG0874, KOG0874, Sphingolipid hydroxylase [Lipid transport and metabolism]. 9.53e-67	sp|O94298|SUR2_SCHPO Sphingolipid C4-hydroxylase sur2 OS=Schizosaccharomyces pombe (strain 972 / ATCC 24843) GN=sur2 PE=3 SV=1 6.14e-59	GO:0000170, sphingosine hydroxylase activity;GO:0003674, molecular_function;GO:0003824, catalytic activity;GO:0005488, binding;GO:0005506, iron ion binding;GO:0005575, cellular_component;GO:0005622, intracellular;GO:0005623, cell;GO:0005737, cytoplasm;GO:0005783, endoplasmic reticulum;GO:0005789, endoplasmic reticulum membrane;GO:0006629, lipid metabolic process;GO:0006643, membrane lipid metabol…	KAJ3030569.1 hypothetical protein HDU68_008586 [Siphonaria sp. JEL0065] 3.07e-39	-
TRINITY_DN12290_c0_g1	4.61288	1.058	2.12433	5.82945e-05	0.00045259	up	-	pfam06985, HET, Heterokaryon incompatibility protein (HET). This family represents a conserved region approximately 150 residues long within various heterokaryon incompatibility proteins that seem to be restricted to ascomycete fungi. Genetic differences in specific het genes prevent a viable heterokaryotic fungal cell from being formed by the fusion of filaments from two different wild-type stra…	-	-	-	-	KAI1693513.1 heterokaryon incompatibility protein (HET) domain-containing protein [Ditylenchus destructor] 4.49e-20	-
TRINITY_DN13193_c0_g1	345.703	82.0048	2.07576	1.24927e-09	2.16482e-08	up	cd00312, Esterase_lipase, Esterases and lipases (includes fungal lipases, cholinesterases, etc.) These enzymes act on carboxylic esters (EC: 3.1.1.-). The catalytic apparatus involves three residues (catalytic triad): a serine, a glutamate or aspartate and a histidine.These catalytic residues are responsible for the nucleophilic attack on the carbonyl carbon atom of the ester bond. In contrast wi…	pfam00135, COesterase, Carboxylesterase family. 8.55e-28	-	KOG4389, KOG4389, KOG4389, Acetylcholinesterase/Butyrylcholinesterase [Signal transduction mechanisms]. 1.24e-35	sp|O62760|CHLE_FELCA Cholinesterase OS=Felis catus GN=BCHE PE=2 SV=1 2.92e-35	-	CAH1790556.1 unnamed protein product [Owenia fusiformis] 8.34e-40	-
TRINITY_DN10750_c0_g1	127.836	41.042	1.63912	1.01942e-05	9.53942e-05	up	cd05352, MDH-like_SDR_c, mannitol dehydrogenase (MDH)-like, classical (c) SDRs. NADP-mannitol dehydrogenase catalyzes the conversion of fructose to mannitol, an acyclic 6-carbon sugar. MDH is a tetrameric member of the SDR family. This subgroup also includes various other tetrameric SDRs, including Pichia stipitis D-arabinitol dehydrogenase (aka polyol dehydrogenase), Candida albicans Sou1p, a so…	pfam00106, adh_short, short chain dehydrogenase. This family contains a wide variety of dehydrogenases. 9.28e-29	-	KOG1200, KOG1200, KOG1200, Mitochondrial/plastidial beta-ketoacyl-ACP reductase [Lipid transport and metabolism]. 8.57e-34	sp|P0C0Y4|MTDH_ALTAL Probable NADP-dependent mannitol dehydrogenase OS=Alternaria alternata PE=1 SV=2 9.84e-51	-	CAF1462552.1 unnamed protein product [Rotaria sp. Silwood1] >CAF3646152.1 unnamed protein product [Rotaria sp. Silwood1] >CAF3684895.1 unnamed protein product [Rotaria sp. Silwood1] >CAF4833018.1 unnamed protein product [Rotaria sp. Silwood1] 4.66e-58	-
TRINITY_DN9276_c0_g1	0.204443	2.77295	-3.76165	0.00134237	0.00726668	down	cd11041, CYP503A1-like, cytochrome P450 family 503, subfamily A, polypeptide 1 and similar cytochrome P450s. This family is composed of predominantly fungal cytochrome P450s (CYPs) with similarity to Fusarium fujikuroi Cytochrome P450 503A1 (CYP503A1, also called ent-kaurene oxidase or cytochrome P450-4), Aspergillus nidulans austinol synthesis protein I (ausI), Alternaria alternata tentoxin synt…	pfam00067, p450, Cytochrome P450. Cytochrome P450s are haem-thiolate proteins involved in the oxidative degradation of various compounds. They are particularly well known for their role in the degradation of environmental toxins and mutagens. They can be divided into 4 classes, according to the method by which electrons from NAD(P)H are delivered to the catalytic site. Sequence conservation is re…	-	KOG0684, KOG0684, KOG0684, Cytochrome P450 [Secondary metabolites biosynthesis, transport and catabolism]. 2.00e-10	sp|Q9C449|PAXP_PENPX Cytochrome P450 monooxygenase paxP OS=Penicillium paxilli GN=paxP PE=1 SV=1 9.89e-60	-	PFX34011.1 Cytochrome P450 3A12 [Stylophora pistillata] 4.97e-20	-
TRINITY_DN10274_c0_g1	0.497034	3.83113	-2.94635	0.00102339	0.00576036	down	-	-	-	-	-	-	-	-
TRINITY_DN7406_c0_g1	1.87827	0.0001	14.1971	0.00232988	0.011699	up	-	-	-	-	-	-	-	-
TRINITY_DN8227_c0_g1	15.3799	1.88627	3.02743	1.06267e-06	1.1978e-05	up	-	-	-	-	-	-	-	-
TRINITY_DN12201_c0_g1	9.55989	51.5032	-2.4296	1.15141e-14	3.55114e-13	down	-	-	-	-	-	-	-	-
TRINITY_DN21282_c0_g1	280.918	13.466	4.38276	2.70541e-18	1.13686e-16	up	-	-	-	-	-	-	-	-
TRINITY_DN13907_c0_g1	70.1576	28.5324	1.298	5.49783e-06	5.43998e-05	up	cd01786, RA_STE50, Ras-associating (RA) domain found in the fungal adaptor protein STE50. The fungal adaptor protein STE50 is an essential component of three MAPK-mediated signaling pathways that control the mating response, invasive/filamentous growth and osmotolerance (HOG pathway), respectively. STE50 functions in cell signaling between the activated G protein and STE11. The domain architectur…	-	K19841-ko04011 MAPK signaling pathway - yeast	-	sp|P25344|STE50_YEAST Protein STE50 OS=Saccharomyces cerevisiae (strain ATCC 204508 / S288c) GN=STE50 PE=1 SV=1 7.13e-14	-	KAJ3019066.1 Adaptor for signal transduction [Siphonaria sp. JEL0065] 1.08e-07	-
TRINITY_DN1029_c0_g1	47.8529	22.2437	1.10521	0.00179915	0.00935182	up	-	-	K14001-ko04141 Protein processing in endoplasmic reticulum	-	sp|Q6BTV5|SIL1_DEBHA Nucleotide exchange factor SIL1 OS=Debaryomyces hansenii (strain ATCC 36239 / CBS 767 / JCM 1990 / NBRC 0083 / IGC 2968) GN=SIL1 PE=3 SV=2 3.39e-18	-	-	-
TRINITY_DN8297_c0_g1	0.335046	3.34407	-3.31917	0.00303198	0.0145819	down	-	-	-	-	-	-	-	-
TRINITY_DN11567_c0_g1	3.75752	0.178555	4.39534	2.51913e-07	3.15114e-06	up	-	-	-	-	-	-	-	-
TRINITY_DN11736_c0_g1	3.18999	9.89666	-1.63339	0.00196795	0.0100888	down	cd03457, intradiol_dioxygenase_like, Intradiol dioxygenase supgroup. Intradiol dioxygenases catalyze the critical ring-cleavage step in the conversion of catecholate derivatives to citric acid cycle intermediates. They break the catechol C1-C2 bond and utilize Fe3+, as opposed to the extradiol-cleaving enzymes which break the C2-C3 or C1-C6 bond and utilize Fe2+ and Mn+. The family contains catec…	-	-	-	-	-	OQV26249.1 hypothetical protein BV898_00367 [Hypsibius exemplaris] 2.84e-76	-
TRINITY_DN11231_c0_g1	22.4559	276.828	-3.62382	2.82491e-24	1.99929e-22	down	cd03141, GATase1_Hsp31_like, Type 1 glutamine amidotransferase (GATase1)-like domain found in proteins similar to Escherichia coli Hsp31 protein. Type 1 glutamine amidotransferase (GATase1)-like domain found in proteins similar to Escherichia coli Hsp31 protein (EcHsp31). This group includes EcHsp31 and Saccharomyces cerevisiae Ydr533c protein. EcHsp31 has chaperone activity. Ydr533c is upregulat…	-	-	-	sp|Q5AF03|HSP31_CANAL Glyoxalase 3 OS=Candida albicans (strain SC5314 / ATCC MYA-2876) GN=GLX3 PE=1 SV=1 1.82e-14	-	UJR34909.1 hypothetical protein I4U23_027687 [Adineta vaga] 8.64e-49	-
TRINITY_DN13741_c3_g3	35.1226	115.974	-1.72334	0.000134351	0.000959364	down	-	-	-	-	-	-	-	-
TRINITY_DN10766_c0_g1	20.2362	53.6677	-1.40711	0.00346532	0.0163216	down	-	pfam13520, AA_permease_2, Amino acid permease. 1.02e-13	-	KOG1289, KOG1289, KOG1289, Amino acid transporters [Amino acid transport and metabolism]. 1.80e-69	sp|P19807|HNM1_YEAST Choline transport protein OS=Saccharomyces cerevisiae (strain ATCC 204508 / S288c) GN=HNM1 PE=1 SV=1 6.85e-68	-	CAF3007320.1 unnamed protein product [Rotaria socialis] >CAF3316982.1 unnamed protein product [Rotaria socialis] >CAF3448524.1 unnamed protein product [Rotaria socialis] >CAF3510424.1 unnamed protein product [Rotaria socialis] >CAF3621810.1 unnamed protein product [Rotaria socialis] 2.20e-86	-
TRINITY_DN13970_c2_g5	7.49099	24.7987	-1.72704	0.00103051	0.00579076	down	-	-	-	-	-	-	-	-
TRINITY_DN13970_c2_g2	9.65805	25.3084	-1.38981	0.00261191	0.0128559	down	cd07564, nitrilases_CHs, Nitrilases, cyanide hydratase (CH)s, and similar proteins (class 1 nitrilases). Nitrilases (nitrile aminohydrolases, EC:3.5.5.1) hydrolyze nitriles (RCN) to ammonia and the corresponding carboxylic acid. Most nitrilases prefer aromatic nitriles, some prefer arylacetonitriles and others aliphatic nitriles. This group includes the nitrilase cyanide dihydratase (CDH), which …	pfam00795, CN_hydrolase, Carbon-nitrogen hydrolase. This family contains hydrolases that break carbon-nitrogen bonds. The family includes: Nitrilase EC:3.5.5.1, Aliphatic amidase EC:3.5.1.4, Biotidinase EC:3.5.1.12, Beta-ureidopropionase EC:3.5.1.6. Nitrilase-related proteins generally have a conserved E-K-C catalytic triad, and are multimeric alpha-beta-beta-alpha sandwich proteins. 1.96e-16	-	KOG0805, KOG0805, KOG0805, Carbon-nitrogen hydrolase [Amino acid transport and metabolism]. 2.69e-38	sp|Q03217|NRL2_RHORH Aliphatic nitrilase OS=Rhodococcus rhodochrous GN=nitA PE=1 SV=2 4.34e-46	-	CAF0985047.1 unnamed protein product [Rotaria sp. Silwood1] >CAF1278878.1 unnamed protein product [Rotaria sp. Silwood1] >CAF3547033.1 unnamed protein product [Rotaria sp. Silwood1] >CAF4825424.1 unnamed protein product [Rotaria sp. Silwood1] 1.12e-106	-
TRINITY_DN13938_c3_g3	0.478363	7.48795	-3.96839	7.75886e-11	1.56422e-09	down	cd17502, MFS_Azr1_MDR_like, Saccharomyces cerevisiae Azole resistance protein 1 (Azr1p), and similar multidrug resistance (MDR) transporters of the Major Facilitator Superfamily. This subfamily is composed of multidrug resistance (MDR) transporters including various Saccharomyces cerevisiae proteins such as azole resistance protein 1 (Azr1p), vacuolar basic amino acid transporter 1 (Vba1p), vacuo…	pfam06609, TRI12, Fungal trichothecene efflux pump (TRI12). This family consists of several fungal specific trichothecene efflux pump proteins. Many of the genes involved in trichothecene toxin biosynthesis in Fusarium sporotrichioides are present within a gene cluster.It has been suggested that TRI12 may play a role in F. sporotrichioides self-protection against trichothecenes. 4.41e-10	-	-	sp|B6HJU0|ROQT_PENRW Efflux pump roqT OS=Penicillium rubens (strain ATCC 28089 / DSM 1075 / NRRL 1951 / Wisconsin 54-1255) GN=roqT PE=1 SV=1 1.55e-121	-	KAJ3010587.1 hypothetical protein HDU68_002075 [Siphonaria sp. JEL0065] 6.70e-93	-
TRINITY_DN3364_c0_g1	0.22057	5.42924	-4.62144	0.00563077	0.0246394	down	-	-	-	-	-	-	-	-
TRINITY_DN11473_c0_g1	2.07416	7.51287	-1.85684	0.000396322	0.00250793	down	cd01838, Isoamyl_acetate_hydrolase_like, Isoamyl-acetate hydrolyzing esterase-like proteins. SGNH_hydrolase subfamily similar to the Saccharomyces cerevisiae IAH1. IAH1 may be the major esterase that hydrolyses isoamyl acetate in sake mash. The SGNH-family of hydrolases is a diverse family of lipases and esterases. The tertiary fold of the enzyme is substantially different from that of the alpha/…	-	-	KOG3035, KOG3035, KOG3035, Isoamyl acetate-hydrolyzing esterase [Lipid transport and metabolism]. 1.91e-38	sp|Q503L4|IAH1_DANRE Isoamyl acetate-hydrolyzing esterase 1 homolog OS=Danio rerio GN=iah1 PE=2 SV=2 5.08e-30	-	XP_044144580.1 isoamyl acetate-hydrolyzing esterase 1 homolog isoform X2 [Bufo gargarizans] 4.53e-32	-
TRINITY_DN13939_c1_g2	328.464	106.057	1.63089	0.000220681	0.00149873	up	cd03426, CoAse, Coenzyme A pyrophosphatase (CoAse), a member of the Nudix hydrolase superfamily, functions to catalyze the elimination of oxidized inactive CoA, which can inhibit CoA-utilizing enzymes. The need of CoAses mainly arises under conditions of oxidative stress. CoAse has a conserved Nudix fold and requires a single divalent cation for catalysis. In addition to a signature Nudix motif G…	pfam04145, Ctr, Ctr copper transporter family. The redox active metal copper is an essential cofactor in critical biological processes such as respiration, iron transport, oxidative stress protection, hormone production, and pigmentation. A widely conserved family of high-affinity copper transport proteins (Ctr proteins) mediates copper uptake at the plasma membrane. A series of clustered methion…	-	KOG3069, KOG3069, KOG3069, Peroxisomal NUDIX hydrolase [Replication, recombination and repair]. 7.69e-13	sp|Q12524|PCD1_YEAST Peroxisomal coenzyme A diphosphatase 1, peroxisomal OS=Saccharomyces cerevisiae (strain ATCC 204508 / S288c) GN=PCD1 PE=1 SV=1 1.76e-29	GO:0003674, molecular_function;GO:0003824, catalytic activity;GO:0005575, cellular_component;GO:0005622, intracellular;GO:0005623, cell;GO:0005737, cytoplasm;GO:0005777, peroxisome;GO:0005829, cytosol;GO:0006139, nucleobase-containing compound metabolic process;GO:0006163, purine nucleotide metabolic process;GO:0006259, DNA metabolic process;GO:0006281, DNA repair;GO:0006725, cellular aromatic co…	XP_028307325.1 peroxisomal coenzyme A diphosphatase NUDT7 [Gouania willdenowi] >XP_028307326.1 peroxisomal coenzyme A diphosphatase NUDT7 [Gouania willdenowi] 7.23e-18	-
TRINITY_DN13436_c0_g1	21.2701	144.079	-2.75996	3.48157e-12	8.21345e-11	down	-	pfam08652, RAI1, RAI1 like PD-(D/E)XK nuclease. RAI1 is homologous to Caenorhabditis elegans DOM-3 and human DOM3Z and binds to a nuclear exoribonuclease. It is required for 5.8S rRNA processing. Profile-profile comparison tools demonstrate this to be a PD-(D/E)XK nuclease, with a full set of canonical active site signature motifs characteristic to the PD-(D/E)XK nuclease superfamily. 3.07e-14	-	KOG1838, KOG1838, KOG1838, Alpha/beta hydrolase [General function prediction only]. 1.73e-51	sp|Q9HE87|DXO_NEUCR Decapping nuclease rai1 OS=Neurospora crassa (strain ATCC 24698 / 74-OR23-1A / CBS 708.71 / DSM 1257 / FGSC 987) GN=rai1 PE=3 SV=4 3.06e-134	GO:0003674, molecular_function;GO:0003824, catalytic activity;GO:0006082, organic acid metabolic process;GO:0006629, lipid metabolic process;GO:0006631, fatty acid metabolic process;GO:0006633, fatty acid biosynthetic process;GO:0006638, neutral lipid metabolic process;GO:0006639, acylglycerol metabolic process;GO:0006641, triglyceride metabolic process;GO:0008150, biological_process;GO:0008152, …	XP_039299606.1 LOW QUALITY PROTEIN: putative esterase YMR210W [Nilaparvata lugens] 8.02e-139	-
TRINITY_DN14046_c0_g1	84.4971	320.971	-1.92547	3.16601e-06	3.29515e-05	down	cd01160, LCAD, Long chain acyl-CoA dehydrogenase. LCAD is an acyl-CoA dehydrogenases (ACAD), which is found in the mitochondria of eukaryotes and in some prokaryotes. It catalyzes the alpha, beta dehydrogenation of the corresponding trans-enoyl-CoA by FAD, which becomes reduced. The reduced form of LCAD is reoxidized in the oxidative half-reaction by electron-transferring flavoprotein (ETF), from…	pfam03583, LIP, Secretory lipase. These lipases are expressed and secreted during the infection cycle of these pathogens. In particular, C. albicans has a large number of different lipases, possibly reflecting broad lipolytic activity, which may contribute to the persistence and virulence of C. albicans in human tissue. 1.56e-37	-	KOG0137, KOG0137, KOG0137, Very-long-chain acyl-CoA dehydrogenase [Lipid transport and metabolism]. 3.04e-33	sp|D4AX63|LIPA_ARTBC Lipase A OS=Arthroderma benhamiae (strain ATCC MYA-4681 / CBS 112371) GN=ARB_00790 PE=3 SV=1 3.93e-72	-	KAJ3031679.1 hypothetical protein HDU68_001196 [Siphonaria sp. JEL0065] 5.46e-169	-
TRINITY_DN8450_c0_g1	1.88816	13.2926	-2.81558	5.28027e-08	7.32753e-07	down	cd00312, Esterase_lipase, Esterases and lipases (includes fungal lipases, cholinesterases, etc.) These enzymes act on carboxylic esters (EC: 3.1.1.-). The catalytic apparatus involves three residues (catalytic triad): a serine, a glutamate or aspartate and a histidine.These catalytic residues are responsible for the nucleophilic attack on the carbonyl carbon atom of the ester bond. In contrast wi…	pfam00135, COesterase, Carboxylesterase family. 4.28e-36	K03927-ko00983 Drug metabolism - other enzymes	KOG4389, KOG4389, KOG4389, Acetylcholinesterase/Butyrylcholinesterase [Signal transduction mechanisms]. 1.80e-37	sp|D2D3B6|FUMD_SPHMC Fumonisin B1 esterase OS=Sphingopyxis macrogoltabida GN=fumD PE=1 SV=1 3.39e-49	-	CAD2180049.1 unnamed protein product [Meloidogyne enterolobii] 2.86e-73	-
TRINITY_DN11468_c0_g2	36.134	8.69139	2.0557	1.04604e-10	2.07159e-09	up	cd13854, CuRO_1_MaLCC_like, The first cupredoxin domain of the fungal laccases similar to Ma-LCC from Melanocarpus albomyces. The subfamily of fungal laccases includes Ma-LCC and similar proteins. Ma-LCC is a multicopper oxidase (MCO) from Melanocarpus albomyces. Its crystal structure contains all four coppers at the mono- and trinuclear copper centers. Laccase is a blue multi-copper enzyme that …	pfam07732, Cu-oxidase_3, Multicopper oxidase. This entry contains many divergent copper oxidase-like domains that are not recognized by the pfam00394 model. 3.73e-30	-	KOG1263, KOG1263, KOG1263, Multicopper oxidases [Secondary metabolites biosynthesis, transport and catabolism]. 2.46e-07	sp|Q96WM9|LAC2_BOTFU Laccase-2 OS=Botryotinia fuckeliana GN=lcc2 PE=2 SV=1 6.35e-157	-	KAI4458121.1 multi-copper oxidase [Holotrichia oblita] 2.25e-43	-
TRINITY_DN11468_c0_g1	1.2078	79.9155	-6.04802	3.90011e-29	4.09724e-27	down	cd13854, CuRO_1_MaLCC_like, The first cupredoxin domain of the fungal laccases similar to Ma-LCC from Melanocarpus albomyces. The subfamily of fungal laccases includes Ma-LCC and similar proteins. Ma-LCC is a multicopper oxidase (MCO) from Melanocarpus albomyces. Its crystal structure contains all four coppers at the mono- and trinuclear copper centers. Laccase is a blue multi-copper enzyme that …	pfam07732, Cu-oxidase_3, Multicopper oxidase. This entry contains many divergent copper oxidase-like domains that are not recognized by the pfam00394 model. 2.89e-32	-	KOG1263, KOG1263, KOG1263, Multicopper oxidases [Secondary metabolites biosynthesis, transport and catabolism]. 4.27e-41	sp|Q96WM9|LAC2_BOTFU Laccase-2 OS=Botryotinia fuckeliana GN=lcc2 PE=2 SV=1 2.63e-101	-	CAF3241363.1 unnamed protein product [Rotaria socialis] >CAF3315620.1 unnamed protein product [Rotaria socialis] >CAF4505279.1 unnamed protein product [Rotaria socialis] >CAF4616276.1 unnamed protein product [Rotaria socialis] 4.08e-63	-
TRINITY_DN21018_c0_g1	1.87109	10.1861	-2.44466	9.22905e-08	1.23118e-06	down	-	-	-	-	-	-	-	-
TRINITY_DN8694_c0_g1	0.0949577	1.90827	-4.32884	0.00404064	0.0186013	down	-	-	-	-	-	-	-	-
TRINITY_DN11094_c0_g1	0.663107	16.0531	-4.59746	5.94965e-09	9.38002e-08	down	cd05251, NmrA_like_SDR_a, NmrA (a transcriptional regulator) and HSCARG (an NADPH sensor) like proteins, atypical (a) SDRs. NmrA and HSCARG like proteins. NmrA is a negative transcriptional regulator of various fungi, involved in the post-translational modulation of the GATA-type transcription factor AreA. NmrA lacks the canonical GXXGXXG NAD-binding motif and has altered residues at the catalyti…	pfam05368, NmrA, NmrA-like family. NmrA is a negative transcriptional regulator involved in the post-translational modification of the transcription factor AreA. NmrA is part of a system controlling nitrogen metabolite repression in fungi. This family only contains a few sequences as iteration results in significant matches to other Rossmann fold families. 8.73e-10	-	-	sp|Q5ZID0|NMRL1_CHICK NmrA-like family domain-containing protein 1 OS=Gallus gallus GN=NMRAL1 PE=2 SV=1 1.46e-21	-	XP_002732736.1 PREDICTED: nmrA-like family domain-containing protein 1-like [Saccoglossus kowalevskii] 1.03e-13	-
TRINITY_DN13247_c1_g1	205.819	76.1545	1.43438	9.92016e-06	9.3154e-05	up	-	-	K12763-ko04113 Meiosis - yeast	-	sp|A8JPF9|STUA_COLGL Cell pattern formation-associated protein STUA OS=Colletotrichum gloeosporioides GN=STUA PE=2 SV=2 0.0	GO:0000003, reproduction;GO:0000905, sporocarp development involved in asexual reproduction;GO:0003006, developmental process involved in reproduction;GO:0003674, molecular_function;GO:0003676, nucleic acid binding;GO:0003677, DNA binding;GO:0003700, DNA binding transcription factor activity;GO:0005488, binding;GO:0005575, cellular_component;GO:0005622, intracellular;GO:0005623, cell;GO:0005634, …	-	-
TRINITY_DN13271_c0_g1	5.8152	269.543	-5.53454	4.92421e-28	4.63048e-26	down	cd11065, CYP64-like, cytochrome P450 family 64-like fungal cytochrome P450s. This group includes Aspergillus flavus cytochrome P450 64 (CYP64), also called O-methylsterigmatocystin (OMST) oxidoreductase or aflatoxin B synthase or aflatoxin biosynthesis protein Q, and similar fungal cytochrome P450s. CYP64 converts OMST to aflatoxin B1 and converts dihydro-O-methylsterigmatocystin (DHOMST) to afla…	pfam00067, p450, Cytochrome P450. Cytochrome P450s are haem-thiolate proteins involved in the oxidative degradation of various compounds. They are particularly well known for their role in the degradation of environmental toxins and mutagens. They can be divided into 4 classes, according to the method by which electrons from NAD(P)H are delivered to the catalytic site. Sequence conservation is re…	-	KOG0156, KOG0156, KOG0156, Cytochrome P450 CYP2 subfamily [Secondary metabolites biosynthesis, transport and catabolism]. 3.42e-12	sp|G3Y416|YANC_ASPNA Cytochrome P450 monooxygenase yanC OS=Aspergillus niger (strain ATCC 1015 / CBS 113.46 / FGSC A1144 / LSHB Ac4 / NCTC 3858a / NRRL 328 / USDA 3528.7) GN=yanC PE=1 SV=1 1.99e-24	-	KAG8579998.1 hypothetical protein GDO81_007072 [Engystomops pustulosus] >KAG8579999.1 hypothetical protein GDO81_007072 [Engystomops pustulosus] 1.85e-18	-
TRINITY_DN14052_c2_g1	24.0826	9.03581	1.41427	1.90111e-05	0.000167721	up	sd00017, ZF_C2H2, Zinc finger, C2H2 type. The C2H2 zinc finger is a classical zinc finger domain. C2H2-type zinc fingers are ubiquitous; more than 1% of all mammalian proteins are predicted to contain at least one zinc finger. They often function as DNA or protein binding structural motifs, such as in eukaryotic transcription factors, and therefore they play important roles in cellular processes …	-	-	-	sp|P53243|YG2A_YEAST Zinc finger protein YGR067C OS=Saccharomyces cerevisiae (strain ATCC 204508 / S288c) GN=YGR067C PE=3 SV=2 3.98e-07	-	KAI1694100.1 fungal zn(2)-Cys(6) binuclear cluster domain-containing protein [Ditylenchus destructor] 1.08e-07	-
TRINITY_DN13928_c0_g1	122.498	49.3967	1.31027	3.11089e-05	0.000258223	up	cd01943, MAK32, MAK32 kinase. MAK32 is a protein found primarily in fungi that is necessary for the structural stability of L-A particles. The L-A virus particule is a specialized compartment for the transcription and replication of double-stranded RNA, known to infect yeast and other fungi. MAK32 is part of the host machinery used by the virus to multiply. 1.08e-10	pfam14420, Clr5, Clr5 domain. This domain is found at the N-terminus of the Clr5 protein which has been shown to be involved in silencing in fission yeast. This domain has been found to often be associated with proteins that contain ankyrin repeats and large regions of disordered sequence. 7.90e-10	-	-	sp|Q09839|YAC1_SCHPO Uncharacterized protein C16C9.01c OS=Schizosaccharomyces pombe (strain 972 / ATCC 24843) GN=SPAC16C9.01c PE=4 SV=1 6.30e-22	-	-	-
TRINITY_DN13812_c0_g1	65.5516	32.1682	1.027	0.011535	0.0441417	up	cd08734, RGS-like_1, Uncharacterized Regulator of G protein Signaling (RGS) domain subfamily, child 1. These uncharacterized RGS-like domains consists largely of hypothetical proteins. The RGS domain is an essential part of the Regulator of G-protein Signaling (RGS) protein family, a diverse group of multifunctional proteins that regulate cellular signaling events downstream of G-protein coupled …	-	-	-	sp|P38256|YBU6_YEAST Uncharacterized protein YBR096W OS=Saccharomyces cerevisiae (strain ATCC 204508 / S288c) GN=YBR096W PE=1 SV=1 9.64e-10	-	KAI1691420.1 hypothetical protein Ddc_24231 [Ditylenchus destructor] 1.77e-44	-
TRINITY_DN11845_c0_g1	40.3353	176.207	-2.12716	5.06412e-05	0.000397069	down	-	pfam05057, DUF676, Putative serine esterase (DUF676). This family of proteins are probably serine esterase type enzymes with an alpha/beta hydrolase fold. 1.27e-14	-	KOG4372, KOG4372, KOG4372, Predicted alpha/beta hydrolase [General function prediction only]. 1.18e-22	sp|Q04093|YD444_YEAST Putative lipase YDR444W OS=Saccharomyces cerevisiae (strain ATCC 204508 / S288c) GN=YDR444W PE=1 SV=1 2.75e-13	GO:0003674, molecular_function;GO:0003824, catalytic activity;GO:0005575, cellular_component;GO:0005622, intracellular;GO:0005623, cell;GO:0005634, nucleus;GO:0005737, cytoplasm;GO:0005811, lipid droplet;GO:0006629, lipid metabolic process;GO:0008150, biological_process;GO:0008152, metabolic process;GO:0009056, catabolic process;GO:0009987, cellular process;GO:0016042, lipid catabolic process;GO:…	-	-
TRINITY_DN12613_c0_g4	1210.36	506.877	1.25573	0.000197796	0.00135771	up	-	-	-	-	sp|Q01302|CCG6_NEUCR Clock-controlled protein 6 OS=Neurospora crassa (strain ATCC 24698 / 74-OR23-1A / CBS 708.71 / DSM 1257 / FGSC 987) GN=ccg-6 PE=2 SV=2 6.39e-14	GO:0003674, molecular_function;GO:0005198, structural molecule activity;GO:0005199, structural constituent of cell wall;GO:0005575, cellular_component;GO:0005618, cell wall;GO:0005623, cell;GO:0008150, biological_process;GO:0009277, fungal-type cell wall;GO:0009987, cellular process;GO:0016043, cellular component organization;GO:0030312, external encapsulating structure;GO:0031505, fungal-type ce…	-	-
TRINITY_DN7816_c0_g1	25.3623	8.85663	1.51786	3.07499e-05	0.000255875	up	cd17502, MFS_Azr1_MDR_like, Saccharomyces cerevisiae Azole resistance protein 1 (Azr1p), and similar multidrug resistance (MDR) transporters of the Major Facilitator Superfamily. This subfamily is composed of multidrug resistance (MDR) transporters including various Saccharomyces cerevisiae proteins such as azole resistance protein 1 (Azr1p), vacuolar basic amino acid transporter 1 (Vba1p), vacuo…	pfam06609, TRI12, Fungal trichothecene efflux pump (TRI12). This family consists of several fungal specific trichothecene efflux pump proteins. Many of the genes involved in trichothecene toxin biosynthesis in Fusarium sporotrichioides are present within a gene cluster.It has been suggested that TRI12 may play a role in F. sporotrichioides self-protection against trichothecenes. 1.92e-09	-	-	sp|Q10072|YAN6_SCHPO Uncharacterized transporter C3H1.06c OS=Schizosaccharomyces pombe (strain 972 / ATCC 24843) GN=SPAC3H1.06c PE=3 SV=1 2.91e-49	-	KAJ3024382.1 hypothetical protein HDU68_008231 [Siphonaria sp. JEL0065] 2.77e-64	-
TRINITY_DN13603_c0_g6	8.55233	2.91944	1.55062	0.00337212	0.0159721	up	-	-	-	-	-	-	-	-
TRINITY_DN13440_c0_g1	6.56789	2.65875	1.30468	0.00881977	0.0354664	up	sd00045, ANK, ankyrin repeats. Ankyrin repeats are one of the most abundant repeat motifs, and generally function as scaffolds for protein-protein interactions in processes including cell cycle, transcriptional regulation, signal transduction, vesicular trafficking, and inflammatory response. Although predominantly found in eukaryotic proteins, they are also found in some bacterial and viral prot…	pfam12796, Ank_2, Ankyrin repeats (3 copies). 6.19e-06	-	KOG4177, KOG4177, KOG4177, Ankyrin [Cell wall/membrane/envelope biogenesis]. 2.25e-08	sp|Q8BTI7|ANR52_MOUSE Serine/threonine-protein phosphatase 6 regulatory ankyrin repeat subunit C OS=Mus musculus GN=Ankrd52 PE=1 SV=1 2.82e-06	-	CAH0549306.1 unnamed protein product [Brassicogethes aeneus] 1.75e-14	-
TRINITY_DN13603_c0_g5	2.25023	6.5057	-1.53163	0.000430596	0.00268954	down	cd02650, nuc_hydro_CaPnhB, NH_hydro_CaPnhB: A subgroup of nucleoside hydrolases similar to Corynebacterium ammoniagenes Purine/pyrimidine nucleoside hydrolase (pnhB). Nucleoside hydrolases cleave the N-glycosidic bond in nucleosides generating ribose and the respective base. These enzymes vary in their substrate specificity. . 1.89e-27	pfam01156, IU_nuc_hydro, Inosine-uridine preferring nucleoside hydrolase. 2.95e-18	-	-	sp|B5YWV3|RIHB_ECO5E Pyrimidine-specific ribonucleoside hydrolase RihB OS=Escherichia coli O157:H7 (strain EC4115 / EHEC) GN=rihB PE=3 SV=1 6.23e-18	-	KAG1647615.1 putative uridine nucleosidase 2 [Nymphon striatum] 9.57e-18	-
TRINITY_DN14985_c0_g1	0.0671872	1.48188	-4.4631	0.00368451	0.0172213	down	cd00398, Aldolase_II, Class II Aldolase and Adducin head (N-terminal) domain. Aldolases are ubiquitous enzymes catalyzing central steps of carbohydrate metabolism. Based on enzymatic mechanisms, this superfamily has been divided into two distinct classes (Class I and II). Class II enzymes are further divided into two sub-classes A and B. This family includes class II A aldolases and adducins whic…	pfam00596, Aldolase_II, Class II Aldolase and Adducin N-terminal domain. This family includes class II aldolases and adducins which have not been ascribed any enzymatic function. 3.41e-33	-	KOG3699, KOG3699, KOG3699, Cytoskeletal protein Adducin [Signal transduction mechanisms, Cytoskeleton]. 3.37e-15	sp|Q9P5M9|MUG14_SCHPO Meiotically up-regulated gene 14 protein OS=Schizosaccharomyces pombe (strain 972 / ATCC 24843) GN=mug14 PE=1 SV=1 1.04e-84	-	MCL4125640.1 hypothetical protein [Idotea baltica] 4.49e-60	-
TRINITY_DN11564_c0_g1	21.7622	9.4411	1.2048	5.69635e-05	0.000443537	up	-	-	-	-	sp|Q5K8R6|CXT1_CRYNJ Beta-1,2-xylosyltransferase 1 OS=Cryptococcus neoformans var. neoformans serotype D (strain JEC21 / ATCC MYA-565) GN=CXT1 PE=1 SV=1 7.95e-25	-	KAJ3025662.1 F-actin-capping protein subunit alpha [Siphonaria sp. JEL0065] 3.79e-14	-
TRINITY_DN9120_c0_g1	1.34951	4.37841	-1.69798	0.00928466	0.0370367	down	-	-	-	-	-	-	-	-
TRINITY_DN7343_c0_g2	0.063167	2.00878	-4.99101	0.000553443	0.00335383	down	-	-	-	-	-	-	-	-
TRINITY_DN13618_c1_g1	4.3743	23.3672	-2.41737	6.90559e-07	8.05373e-06	down	-	-	-	-	sp|O94490|YC79_SCHPO Uncharacterized transcriptional regulatory protein C417.09c OS=Schizosaccharomyces pombe (strain 972 / ATCC 24843) GN=SPCC417.09c PE=3 SV=1 9.65e-29	-	-	-
TRINITY_DN16931_c0_g1	0.566776	8.28404	-3.86948	1.57619e-08	2.35762e-07	down	-	-	-	-	-	-	-	-
TRINITY_DN9764_c0_g1	1.63042	18.0649	-3.46987	7.28348e-20	3.46081e-18	down	cd08297, CAD3, Cinnamyl alcohol dehydrogenases (CAD). These alcohol dehydrogenases are related to the cinnamyl alcohol dehydrogenases (CAD), members of the medium chain dehydrogenase/reductase family. NAD(P)(H)-dependent oxidoreductases are the major enzymes in the interconversion of alcohols and aldehydes, or ketones. Cinnamyl alcohol dehydrogenases (CAD) reduce cinnamaldehydes to cinnamyl alcoh…	pfam08240, ADH_N, Alcohol dehydrogenase GroES-like domain. This is the catalytic domain of alcohol dehydrogenases. Many of them contain an inserted zinc binding domain. This domain has a GroES-like structure. 1.03e-10	K13953-ko00010 Glycolysis / Gluconeogenesis;ko00350 Tyrosine metabolism;ko00071 Fatty acid degradation;ko00830 Retinol metabolism;ko00626 Naphthalene degradation;ko01220 Degradation of aromatic compounds;ko00625 Chloroalkane and chloroalkene degradation;ko00982 Drug metabolism - cytochrome P450;ko00980 Metabolism of xenobiotics by cytochrome P450	KOG0023, KOG0023, KOG0023, Alcohol dehydrogenase, class V [Secondary metabolites biosynthesis, transport and catabolism]. 1.50e-51	sp|O94038|ADH2_CANAL Alcohol dehydrogenase 2 OS=Candida albicans (strain SC5314 / ATCC MYA-2876) GN=ADH2 PE=3 SV=1 1.92e-85	-	CAD5213101.1 unnamed protein product [Bursaphelenchus okinawaensis] >CAG9099102.1 unnamed protein product [Bursaphelenchus okinawaensis] 5.54e-71	-
TRINITY_DN14410_c0_g1	1.45059	19.3915	-3.74072	3.47491e-14	1.02697e-12	down	cd01299, Met_dep_hydrolase_A, Metallo-dependent hydrolases, subgroup A is part of the superfamily of metallo-dependent hydrolases, a large group of proteins that show conservation in their 3-dimensional fold (TIM barrel) and in details of their active site. The vast majority of the members have a conserved metal binding site, involving four histidines and one aspartic acid residue. In the common …	-	-	-	sp|P68916|Y2939_MYCBO Uncharacterized protein Mb2939c OS=Mycobacterium bovis (strain ATCC BAA-935 / AF2122/97) GN=Mb2939c PE=4 SV=1 2.70e-09	-	CAF1173199.1 unnamed protein product [Adineta steineri] >CAF1404202.1 unnamed protein product [Adineta steineri] 4.25e-52	-
TRINITY_DN6463_c0_g1	1.70042	29.0179	-4.09298	1.36249e-20	6.96631e-19	down	-	pfam18922, DUF5672, Protein of unknown function (DUF5672). This family of proteins is functionally uncharacterized. This family of proteins is found in bacteria, archaea, eukaryotes and viruses. Proteins in this family are typically between 260 and 408 amino acids in length. This entry corresponds to a region of about 200 amino acids in length with multiple conserved motifs. There are two conserv…	-	-	-	-	CAF1473286.1 unnamed protein product [Adineta steineri] >CAF4073609.1 unnamed protein product [Adineta steineri] 2.57e-20	-
TRINITY_DN14268_c3_g1	1.44498	0.200641	2.84836	0.0076908	0.0317429	up	-	-	-	-	-	-	-	-
TRINITY_DN7636_c0_g1	3.248	0.150179	4.43479	2.933e-05	0.000245274	up	-	pfam03171, 2OG-FeII_Oxy, 2OG-Fe(II) oxygenase superfamily. This family contains members of the 2-oxoglutarate (2OG) and Fe(II)-dependent oxygenase superfamily. This family includes the C-terminal of prolyl 4-hydroxylase alpha subunit. The holoenzyme has the activity EC:1.14.11.2 catalyzing the reaction: Procollagen L-proline + 2-oxoglutarate + O2 <=> procollagen trans- 4-hydroxy-L-proline + succi…	-	KOG0143, KOG0143, KOG0143, Iron/ascorbate family oxidoreductases [Secondary metabolites biosynthesis, transport and catabolism, General function prediction only]. 2.36e-14	sp|Q8LEA2|G2OX1_ARATH Gibberellin 2-beta-dioxygenase 1 OS=Arabidopsis thaliana GN=GA2OX1 PE=2 SV=2 1.27e-11	-	KAJ3027834.1 hypothetical protein HDU68_003035, partial [Siphonaria sp. JEL0065] 1.06e-22	-
TRINITY_DN13142_c0_g1	158.368	62.3576	1.34464	2.05382e-06	2.19014e-05	up	-	pfam03663, Glyco_hydro_76, Glycosyl hydrolase family 76. Family of alpha-1,6-mannanases. 8.99e-80	-	-	sp|P36091|DCW1_YEAST Mannan endo-1,6-alpha-mannosidase DCW1 OS=Saccharomyces cerevisiae (strain ATCC 204508 / S288c) GN=DCW1 PE=1 SV=1 6.37e-75	-	KAJ3014194.1 hydrolase 76 protein [Siphonaria sp. JEL0065] 3.56e-09	-
TRINITY_DN7132_c0_g1	3.48823	39.8886	-3.51541	2.32152e-20	1.1435e-18	down	-	-	-	-	-	-	KAJ3012026.1 hypothetical protein HDU68_001409 [Siphonaria sp. JEL0065] 3.48e-08	-
TRINITY_DN13372_c0_g1	35.0683	7.47946	2.22916	2.03693e-07	2.57916e-06	up	-	-	-	-	sp|P56216|VAOX_PENSI Vanillyl-alcohol oxidase OS=Penicillium simplicissimum GN=VAOA PE=1 SV=1 1.11e-72	-	VDN18313.1 unnamed protein product [Gongylonema pulchrum] 2.38e-07	-
TRINITY_DN10899_c0_g1	41.185	18.0866	1.1872	4.93691e-05	0.000388433	up	-	-	-	-	-	-	-	-
TRINITY_DN9439_c0_g1	5.43816	0.779681	2.80216	0.000251766	0.00168265	up	-	-	-	-	-	-	-	-
TRINITY_DN11912_c0_g1	1.62838	7.82109	-2.26393	6.37888e-05	0.000489873	down	-	-	-	-	-	-	-	-
TRINITY_DN8218_c0_g1	0.483887	12.8791	-4.73422	1.18443e-19	5.5495e-18	down	-	pfam00743, FMO-like, Flavin-binding monooxygenase-like. This family includes FMO proteins, cyclohexanone mono-oxygenase and a number of different mono-oxygenases. 2.63e-09	-	KOG1399, KOG1399, KOG1399, Flavin-containing monooxygenase [Secondary metabolites biosynthesis, transport and catabolism]. 3.16e-08	sp|Q9LMA1|FMO1_ARATH Probable flavin-containing monooxygenase 1 OS=Arabidopsis thaliana GN=FMO1 PE=2 SV=1 4.62e-15	-	CAF1460981.1 unnamed protein product [Adineta steineri] >CAF4105297.1 unnamed protein product [Adineta steineri] 1.27e-68	-
TRINITY_DN13624_c0_g1	46.3386	161.657	-1.80265	2.40033e-05	0.000205456	down	cd04733, OYE_like_2_FMN, Old yellow enzyme (OYE)-related FMN binding domain, group 2. Each monomer of OYE contains FMN as a non-covalently bound cofactor, uses NADPH as a reducing agent with oxygens, quinones, and alpha,beta-unsaturated aldehydes and ketones, and can act as electron acceptors in the catalytic reaction. Other members of OYE family include trimethylamine dehydrogenase, 2,4-dienoyl-…	pfam00724, Oxidored_FMN, NADH:flavin oxidoreductase / NADH oxidase family. 3.06e-23	-	KOG0134, KOG0134, KOG0134, NADH:flavin oxidoreductase/12-oxophytodienoate reductase [Energy production and conversion, General function prediction only]. 1.20e-43	sp|P32382|NADO_THEBR NADH oxidase OS=Thermoanaerobacter brockii PE=1 SV=1 1.34e-34	-	CAF3032567.1 unnamed protein product [Rotaria sp. Silwood2] >CAF4240976.1 unnamed protein product [Rotaria sp. Silwood2] 5.64e-94	-
TRINITY_DN12265_c0_g1	9.90476	24.3952	-1.30041	0.00650075	0.0276456	down	-	pfam11911, DUF3429, Protein of unknown function (DUF3429). This family of proteins are functionally uncharacterized. This protein is found in bacteria and eukaryotes. Proteins in this family are typically between 147 to 245 amino acids in length. 1.12e-16	-	-	-	-	XP_053394055.1 uncharacterized protein LOC123525206 [Mercenaria mercenaria] >XP_053394057.1 uncharacterized protein LOC123525206 [Mercenaria mercenaria] 3.72e-07	-
TRINITY_DN20779_c0_g1	1.42074	4.61466	-1.69959	0.0040604	0.0186722	down	-	-	-	-	-	-	-	-
TRINITY_DN12596_c0_g1	27.7086	0.950575	4.86539	3.04085e-17	1.1784e-15	up	-	-	-	-	-	-	-	-
TRINITY_DN26233_c0_g1	0.083201	8.70604	-6.70927	3.19687e-11	6.78074e-10	down	cd06914, GT8_GNT1, GNT1 is a fungal enzyme that belongs to the GT 8 family. N-acetylglucosaminyltransferase is a fungal enzyme that catalyzes the addition of N-acetyl-D-glucosamine to mannotetraose side chains by an alpha 1-2 linkage during the synthesis of mannan. The N-acetyl-D-glucosamine moiety in mannan plays a role in the attachment of mannan to asparagine residues in proteins. The mannotet…	-	-	-	sp|Q4HVS2|GNT1_GIBZE Glucose N-acetyltransferase 1 OS=Gibberella zeae (strain PH-1 / ATCC MYA-4620 / FGSC 9075 / NRRL 31084) GN=GNT1 PE=3 SV=1 2.82e-110	-	KAI1697865.1 glucose N-acetyltransferase 1 [Ditylenchus destructor] 6.85e-114	-
TRINITY_DN9986_c0_g1	2.50286	0.333349	2.90847	0.0129462	0.0485463	up	-	-	K01426-ko00627 Aminobenzoate degradation;ko00643 Styrene degradation;ko00360 Phenylalanine metabolism;ko00380 Tryptophan metabolism;ko00330 Arginine and proline metabolism	-	-	-	-	-
TRINITY_DN9334_c0_g1	20.5457	1.32431	3.95552	4.9303e-13	1.28624e-11	up	-	pfam04479, RTA1, RTA1 like protein. This family is comprised of fungal proteins with multiple transmembrane regions. RTA1 is involved in resistance to 7-aminocholesterol, while RTM1 confers resistance to an an unknown toxic chemical in molasses. These proteins may bind to the toxic substance, and thus prevent toxicity. They are not thought to be involved in the efflux of xenobiotics. 1.38e-27	-	-	sp|P53047|RTA1_YEAST Protein RTA1 OS=Saccharomyces cerevisiae (strain ATCC 204508 / S288c) GN=RTA1 PE=1 SV=1 3.84e-31	-	CAF1619885.1 unnamed protein product, partial [Didymodactylos carnosus] >CAF4509248.1 unnamed protein product, partial [Didymodactylos carnosus] 2.77e-34	-
TRINITY_DN14228_c2_g10	22.18	3.66023	2.59925	2.46863e-10	4.7086e-09	up	-	-	-	-	-	-	-	-
TRINITY_DN14228_c2_g11	301.23	19.6996	3.93463	2.00837e-25	1.50037e-23	up	-	-	-	-	-	-	-	-
TRINITY_DN9875_c0_g1	0.263838	7.05965	-4.74187	3.53274e-07	4.29131e-06	down	-	pfam05042, Caleosin, Caleosin related protein. This family contains plant proteins related to caleosin. Caleosins contain calcium-binding domains and have an oleosin-like association with lipid bodies. Caleosins are present at relatively low levels and are mainly bound to microsomal membrane fractions at the early stages of seed development. As the seeds mature, overall levels of caleosins increa…	-	-	sp|Q9SQ57|PXG_SESIN Peroxygenase OS=Sesamum indicum GN=SOP1 PE=1 SV=1 1.43e-06	-	-	-
TRINITY_DN12116_c0_g1	9.46682	3.23419	1.54948	0.000183015	0.0012627	up	cd03046, GST_N_GTT1_like, GST_N family, Saccharomyces cerevisiae GTT1-like subfamily; composed of predominantly uncharacterized proteins with similarity to the S. cerevisiae GST protein, GTT1, and the Schizosaccharomyces pombe GST-III. GSTs are cytosolic dimeric proteins involved in cellular detoxification by catalyzing the conjugation of glutathione (GSH) with a wide range of endogenous and xeno…	-	-	-	-	-	XP_037042477.1 glutathione S-transferase 1-like [Bradysia coprophila] 1.98e-11	-
TRINITY_DN13952_c2_g5	3.65965	12.596	-1.78319	3.42198e-06	3.52338e-05	down	-	pfam06738, ThrE, Putative threonine/serine exporter. ThrE is a family of bacterial and Archaeal proteins that catalyze the export of L-threonine from the cell. UniProtKB:Q79VD1 has been characterized as being necessary for this export. The domain exhibits 10 putative TMs and catalyzes the proton-motive-force-dependent efflux of threonine and serine. 2.03e-18	-	-	sp|O14267|YFPC_SCHPO Uncharacterized UPF0442 protein C7D4.12c OS=Schizosaccharomyces pombe (strain 972 / ATCC 24843) GN=SPAC7D4.12c PE=3 SV=1 1.13e-151	-	KAJ3015211.1 hypothetical protein HDU68_012833 [Siphonaria sp. JEL0065] 2.96e-40	-
TRINITY_DN13952_c2_g6	0.88573	6.84392	-2.94988	0.00016581	0.00115646	down	-	-	-	-	-	-	-	-
TRINITY_DN12571_c0_g1	3.32785	8.38435	-1.33311	0.00151026	0.00803343	down	-	pfam11875, DUF3395, Domain of unknown function (DUF3395). This domain is functionally uncharacterized. This domain is found in eukaryotes. This presumed domain is typically between 147 to 176 amino acids in length. This domain is found associated with pfam00226. 2.25e-09	-	KOG0718, KOG0718, KOG0718, Molecular chaperone (DnaJ superfamily) [Posttranslational modification, protein turnover, chaperones]. 3.11e-08	sp|Q9Y7T0|YCJ3_SCHPO Uncharacterized J domain-containing protein C63.03 OS=Schizosaccharomyces pombe (strain 972 / ATCC 24843) GN=SPCC63.03 PE=3 SV=2 1.12e-09	GO:0005575, cellular_component;GO:0005622, intracellular;GO:0005623, cell;GO:0005737, cytoplasm;GO:0005739, mitochondrion;GO:0005740, mitochondrial envelope;GO:0006996, organelle organization;GO:0007005, mitochondrion organization;GO:0007006, mitochondrial membrane organization;GO:0008150, biological_process;GO:0009987, cellular process;GO:0016020, membrane;GO:0016043, cellular component organiza…	XP_037566918.1 dnaJ homolog subfamily C member 11 [Dermacentor silvarum] >KAH7960717.1 hypothetical protein HPB49_022522 [Dermacentor silvarum] 4.77e-12	-
TRINITY_DN12183_c0_g1	37.7322	8.76367	2.10619	2.0658e-11	4.45172e-10	up	-	pfam07745, Glyco_hydro_53, Glycosyl hydrolase family 53. This domain belongs to family 53 of the glycosyl hydrolase classification. These enzymes are enzymes are endo-1,4- beta-galactanases (EC:3.2.1.89). The structure of this domain is known and has a TIM barrel fold. 1.10e-71	-	-	sp|P83692|GANA_THIHE Arabinogalactan endo-beta-1,4-galactanase OS=Thielavia heterothallica PE=1 SV=1 1.04e-154	-	CAF1479371.1 unnamed protein product [Didymodactylos carnosus] >CAF4270056.1 unnamed protein product [Didymodactylos carnosus] 2.70e-39	-
TRINITY_DN23829_c0_g1	0.0001	3.58233	-15.1286	3.68172e-05	0.000300049	down	-	-	-	-	-	-	-	-
TRINITY_DN12538_c0_g1	32.4765	81.0179	-1.31884	0.00028504	0.00188536	down	-	-	-	-	-	-	-	-
TRINITY_DN11862_c0_g1	37.2287	17.0992	1.12249	5.70661e-05	0.000444079	up	-	-	-	-	-	-	-	-
TRINITY_DN6786_c0_g1	0.390845	1.93622	-2.30858	0.00325276	0.0154886	down	-	-	-	-	-	-	-	-
TRINITY_DN16122_c0_g1	3.00645	0.0275409	6.77034	1.00756e-08	1.5344e-07	up	-	-	-	-	-	-	-	-
TRINITY_DN14138_c1_g1	327.126	5.68985	5.84531	9.7846e-81	3.28934e-77	up	cd10317, RGL4_C, C-terminal domain of rhamnogalacturonan lyase, a family 4 polysaccharide lyase. The rhamnogalacturonan lyase of the polysaccharide lyase family 4 (RGL4) is involved in the degradation of RG (rhamnogalacturonan) type-I, an important pectic plant cell wall polysaccharide, by cleaving the alpha-1,4 glycoside bond between L-rhamnose and D-galacturonic acids in the backbone of RG type…	pfam01179, Cu_amine_oxid, Copper amine oxidase, enzyme domain. Copper amine oxidases are a ubiquitous and novel group of quinoenzymes that catalyze the oxidative deamination of primary amines to the corresponding aldehydes, with concomitant reduction of molecular oxygen to hydrogen peroxide. The enzymes are dimers of identical 70-90 kDa subunits, each of which contains a single copper ion and a c…	K00276-ko00410 beta-Alanine metabolism;ko00260 Glycine, serine and threonine metabolism;ko00950 Isoquinoline alkaloid biosynthesis;ko00360 Phenylalanine metabolism;ko00960 Tropane, piperidine and pyridine alkaloid biosynthesis;ko00350 Tyrosine metabolism	KOG1186, KOG1186, KOG1186, Copper amine oxidase [Secondary metabolites biosynthesis, transport and catabolism]. 1.50e-73	sp|Q9P7F2|CAO1_SCHPO Copper amine oxidase 1 OS=Schizosaccharomyces pombe (strain 972 / ATCC 24843) GN=cao1 PE=1 SV=1 0.0	GO:0003674, molecular_function;GO:0003824, catalytic activity;GO:0005488, binding;GO:0005507, copper ion binding;GO:0005575, cellular_component;GO:0005622, intracellular;GO:0005623, cell;GO:0005737, cytoplasm;GO:0006807, nitrogen compound metabolic process;GO:0006873, cellular ion homeostasis;GO:0006875, cellular metal ion homeostasis;GO:0006878, cellular copper ion homeostasis;GO:0008131, primar…	XP_037032511.1 copper amine oxidase 1-like [Bradysia coprophila] 3.77e-123	-
TRINITY_DN9761_c0_g1	45.369	20.7547	1.12827	0.000945323	0.00536361	up	sd00045, ANK, ankyrin repeats. Ankyrin repeats are one of the most abundant repeat motifs, and generally function as scaffolds for protein-protein interactions in processes including cell cycle, transcriptional regulation, signal transduction, vesicular trafficking, and inflammatory response. Although predominantly found in eukaryotic proteins, they are also found in some bacterial and viral prot…	pfam12796, Ank_2, Ankyrin repeats (3 copies). 1.58e-07	-	KOG4177, KOG4177, KOG4177, Ankyrin [Cell wall/membrane/envelope biogenesis]. 2.08e-11	sp|Q8IWZ3|ANKH1_HUMAN Ankyrin repeat and KH domain-containing protein 1 OS=Homo sapiens GN=ANKHD1 PE=1 SV=1 2.41e-21	-	KAI1694588.1 phosphorylase superfamily domain-containing protein [Ditylenchus destructor] 3.99e-33	-
TRINITY_DN1131_c0_g1	0.472633	535.226	-10.1452	1.43767e-08	2.16004e-07	down	-	pfam09994, DUF2235, Uncharacterized alpha/beta hydrolase domain (DUF2235). This domain, found in various hypothetical bacterial proteins, has no known function. 2.39e-59	-	-	sp|P39992|YEC3_YEAST Uncharacterized protein YEL023C OS=Saccharomyces cerevisiae (strain ATCC 204508 / S288c) GN=YEL023C PE=4 SV=1 2.33e-16	-	KAJ3017355.1 hypothetical protein HDU68_011738 [Siphonaria sp. JEL0065] 5.96e-23	-
TRINITY_DN9536_c0_g1	0.0664923	3.17285	-5.57645	0.00157588	0.00834944	down	-	-	-	-	-	-	-	-
TRINITY_DN25954_c0_g1	26.5669	12.1283	1.13125	0.00016558	0.00115545	up	-	pfam01302, CAP_GLY, CAP-Gly domain. Cytoskeleton-associated proteins (CAPs) are involved in the organisation of microtubules and transportation of vesicles and organelles along the cytoskeletal network. A conserved motif, CAP-Gly, has been identified in a number of CAPs, including CLIP-170 and dynactins. The crystal structure of Caenorhabditis elegans F53F4.3 protein CAP-Gly domain was recently s…	-	KOG4568, KOG4568, KOG4568, Cytoskeleton-associated protein and related proteins [Cytoskeleton, General function prediction only]. 1.08e-06	sp|P79065|TIP1_SCHPO Tip elongation protein 1 OS=Schizosaccharomyces pombe (strain 972 / ATCC 24843) GN=tip1 PE=1 SV=1 3.24e-12	GO:0000003, reproduction;GO:0000022, mitotic spindle elongation;GO:0000070, mitotic sister chromatid segregation;GO:0000226, microtubule cytoskeleton organization;GO:0000228, nuclear chromosome;GO:0000235, astral microtubule;GO:0000278, mitotic cell cycle;GO:0000280, nuclear division;GO:0000741, karyogamy;GO:0000742, karyogamy involved in conjugation with cellular fusion;GO:0000743, nuclear migra…	KIH45129.1 CAP-Gly domain protein, partial [Ancylostoma duodenale] 1.18e-07	-
TRINITY_DN9062_c0_g1	141.277	407.862	-1.52956	1.96702e-05	0.000172204	down	cd03344, GroEL, GroEL_like type I chaperonin. Chaperonins are involved in productive folding of proteins. They share a common general morphology, a double toroid of 2 stacked rings, each composed of 7-9 subunits. The symmetry of type I is seven-fold and they are found in eubacteria (GroEL) and in organelles of eubacterial descent (hsp60 and RBP). With the aid of cochaperonin GroES, GroEL encapsul…	pfam00118, Cpn60_TCP1, TCP-1/cpn60 chaperonin family. This family includes members from the HSP60 chaperone family and the TCP-1 (T-complex protein) family. 8.78e-21	K04077-ko04212 Longevity regulating pathway - worm;ko03018 RNA degradation	KOG0356, KOG0356, KOG0356, Mitochondrial chaperonin, Cpn60/Hsp60p [Posttranslational modification, protein turnover, chaperones]. 0.0	sp|Q5B041|HSP60_EMENI Heat shock protein 60 OS=Emericella nidulans (strain FGSC A4 / ATCC 38163 / CBS 112.46 / NRRL 194 / M139) GN=hsp60 PE=1 SV=1 0.0	GO:0000166, nucleotide binding;GO:0003674, molecular_function;GO:0003676, nucleic acid binding;GO:0003677, DNA binding;GO:0003688, DNA replication origin binding;GO:0003690, double-stranded DNA binding;GO:0003697, single-stranded DNA binding;GO:0003824, catalytic activity;GO:0005488, binding;GO:0005515, protein binding;GO:0005524, ATP binding;GO:0005575, cellular_component;GO:0005622, intracellul…	KAJ3028949.1 chaperonin [Siphonaria sp. JEL0065] 2.36e-259	PREDICTED: Culex pipiens pallens heat shock protein 60A-like (LOC120428214), mRNA 5.68e-66
TRINITY_DN8951_c0_g1	20.086	9.88549	1.0228	0.00307747	0.0147637	up	cd19513, Rad51, RAD51D recombinase. RAD51 recombinase plays an essential role in DNA repair by homologous recombination (HR). HR is an important error-free repair mechanism for chromosomal double-strand break (DSB) which otherwise leads to cell cycle arrest and death. RAD51 is recruited to the break site with the help of its paralogs, RAD51D, RAD51B, RAD51C, XRCC3, and XRCC2, where it forms long …	pfam08423, Rad51, Rad51. Rad51 is a DNA repair and recombination protein and is a homolog of the bacterial ATPase RecA protein. 5.22e-148	K04482-ko03440 Homologous recombination;ko03460 Fanconi anemia pathway	KOG1433, KOG1433, KOG1433, DNA repair protein RAD51/RHP55 [Replication, recombination and repair]. 1.34e-82	sp|P36601|RAD51_SCHPO DNA repair protein rhp51 OS=Schizosaccharomyces pombe (strain 972 / ATCC 24843) GN=rhp51 PE=1 SV=1 2.82e-10	GO:0000003, reproduction;GO:0000018, regulation of DNA recombination;GO:0000150, recombinase activity;GO:0000166, nucleotide binding;GO:0000217, DNA secondary structure binding;GO:0000228, nuclear chromosome;GO:0000278, mitotic cell cycle;GO:0000280, nuclear division;GO:0000400, four-way junction DNA binding;GO:0000709, meiotic joint molecule formation;GO:0000722, telomere maintenance via recombi…	XP_039257177.1 DNA repair protein RAD51 homolog A [Styela clava] >XP_039257178.1 DNA repair protein RAD51 homolog A [Styela clava] 3.14e-148	-
TRINITY_DN13241_c0_g1	2.67455	11.2295	-2.06992	2.943e-05	0.000245874	down	cd17356, MFS_HXT, Fungal Hexose transporter subfamily of the Major Facilitator Superfamily of transporters and similar proteins. The fungal hexose transporter (HXT) subfamily is comprised of functionally redundant proteins that function mainly in the transport of glucose, as well as other sugars such as galactose and fructose. Saccharomyces cerevisiae has 20 genes that encode proteins in this fam…	pfam00083, Sugar_tr, Sugar (and other) transporter. 6.48e-55	-	KOG0254, KOG0254, KOG0254, Predicted transporter (major facilitator superfamily) [General function prediction only]. 4.91e-49	sp|P39932|STL1_YEAST Sugar transporter STL1 OS=Saccharomyces cerevisiae (strain ATCC 204508 / S288c) GN=STL1 PE=1 SV=2 5.03e-83	-	CAF0721232.1 unnamed protein product [Adineta ricciae] >CAF1303002.1 unnamed protein product [Adineta ricciae] 3.22e-41	-
TRINITY_DN10547_c0_g1	5.81382	0.407212	3.83564	8.42702e-12	1.88864e-10	up	-	-	-	-	-	-	-	-
TRINITY_DN9650_c0_g1	5.2369	1.62439	1.68882	0.00404418	0.0186113	up	cd12148, fungal_TF_MHR, fungal transcription factor regulatory middle homology region. This domain is present in the large family of fungal zinc cluster transcription factors that contain an N-terminal GAL4-like C6 zinc binuclear cluster DNA-binding domain. Examples of members of this large fungal group are the following Saccharomyces cerevisiae transcription factors, GAL4, STB5, DAL81, CAT8, RDR…	pfam04082, Fungal_trans, Fungal specific transcription factor domain. 5.50e-07	-	-	sp|Q9HDX1|YKN4_SCHPO Uncharacterized transcriptional regulatory protein PB1A11.04c OS=Schizosaccharomyces pombe (strain 972 / ATCC 24843) GN=SPAPB1A11.04c PE=3 SV=1 1.94e-21	-	-	-
TRINITY_DN4061_c0_g1	22.7517	118.191	-2.37707	9.3642e-07	1.06803e-05	down	-	-	-	-	-	-	KAJ3029740.1 hypothetical protein HDU68_011257 [Siphonaria sp. JEL0065] 9.83e-34	-
TRINITY_DN11972_c0_g1	6.95705	39.0019	-2.487	8.3755e-12	1.88022e-10	down	-	pfam02714, RSN1_7TM, Calcium-dependent channel, 7TM region, putative phosphate. RSN1_7TM is the seven transmembrane domain region of putative phosphate transporter. The family is the 7TM region of osmosensitive calcium-permeable cation channels. 8.23e-44	-	KOG1134, KOG1134, KOG1134, Uncharacterized conserved protein [General function prediction only]. 5.63e-60	sp|Q03516|RSN1_YEAST Uncharacterized protein RSN1 OS=Saccharomyces cerevisiae (strain ATCC 204508 / S288c) GN=RSN1 PE=1 SV=1 4.48e-98	GO:0000322, storage vacuole;GO:0000323, lytic vacuole;GO:0000324, fungal-type vacuole;GO:0000329, fungal-type vacuole membrane;GO:0005575, cellular_component;GO:0005622, intracellular;GO:0005623, cell;GO:0005737, cytoplasm;GO:0005773, vacuole;GO:0005774, vacuolar membrane;GO:0005783, endoplasmic reticulum;GO:0006810, transport;GO:0006892, post-Golgi vesicle-mediated transport;GO:0006893, Golgi to…	CAF3867415.1 unnamed protein product [Adineta steineri] 8.15e-48	-
TRINITY_DN12741_c0_g1	12.1307	5.4294	1.1598	0.000249424	0.00166783	up	cd01820, PAF_acetylesterase_like, PAF_acetylhydrolase (PAF-AH)_like subfamily of SGNH-hydrolases. Platelet-activating factor (PAF) and PAF-AH are key players in inflammation and in atherosclerosis. PAF-AH is a calcium independent phospholipase A2 which exhibits strong substrate specificity towards PAF, hydrolyzing an acetyl ester at the sn-2 position. PAF-AH also degrades a family of oxidized PAF…	-	-	-	-	-	UJR17640.1 hypothetical protein I4U23_004536 [Adineta vaga] 1.19e-31	-
TRINITY_DN14025_c0_g1	0.580539	2.69361	-2.21408	0.0133045	0.0496133	down	-	-	-	-	-	-	-	-
TRINITY_DN7463_c0_g1	2.23309	0.382947	2.54382	0.00184488	0.00955997	up	-	-	-	-	sp|D7UQ40|SOL5_ALTSO Bifunctional solanapyrone synthase OS=Alternaria solani GN=sol5 PE=1 SV=1 1.35e-36	-	CAF1344695.1 unnamed protein product, partial [Adineta ricciae] 2.18e-35	-
TRINITY_DN2697_c0_g1	4.27098	0.298824	3.8372	6.18247e-11	1.26538e-09	up	-	pfam06985, HET, Heterokaryon incompatibility protein (HET). This family represents a conserved region approximately 150 residues long within various heterokaryon incompatibility proteins that seem to be restricted to ascomycete fungi. Genetic differences in specific het genes prevent a viable heterokaryotic fungal cell from being formed by the fusion of filaments from two different wild-type stra…	-	-	sp|Q9UV10|HET6_NEUCR Heterokaryon incompatibility protein 6, OR allele OS=Neurospora crassa (strain ATCC 24698 / 74-OR23-1A / CBS 708.71 / DSM 1257 / FGSC 987) GN=het-6 PE=4 SV=1 2.73e-17	-	KAI1691421.1 heterokaryon incompatibility protein (HET) domain-containing protein [Ditylenchus destructor] 8.41e-15	-
TRINITY_DN9392_c0_g1	4.98488	63.303	-3.66664	1.21016e-16	4.44619e-15	down	-	-	-	-	-	-	KMQ84549.1 polyketide cyclase [Lasius niger] 1.66e-17	-
TRINITY_DN12082_c0_g1	34.4431	69.9265	-1.02163	0.0123834	0.0467097	down	cd00160, RhoGEF, Guanine nucleotide exchange factor for Rho/Rac/Cdc42-like GTPases; Also called Dbl-homologous (DH) domain. It appears that PH domains invariably occur C-terminal to RhoGEF/DH domains. 4.41e-08	pfam07217, Het-C, Heterokaryon incompatibility protein Het-C. In filamentous fungi, het loci (for heterokaryon incompatibility) are believed to regulate self/nonself-recognition during vegetative growth. As filamentous fungi grow, hyphal fusion occurs within an individual colony to form a network. Hyphal fusion can occur also between different individuals to form a heterokaryon, in which genetica…	-	KOG4305, KOG4305, KOG4305, RhoGEF GTPase [Signal transduction mechanisms]. 1.24e-52	sp|Q9Y7U5|RGF3_SCHPO Rho1 guanine nucleotide exchange factor 3 OS=Schizosaccharomyces pombe (strain 972 / ATCC 24843) GN=rgf3 PE=1 SV=1 3.01e-107	GO:0000131, incipient cellular bud site;GO:0000920, cell separation after cytokinesis;GO:0003674, molecular_function;GO:0005085, guanyl-nucleotide exchange factor activity;GO:0005088, Ras guanyl-nucleotide exchange factor activity;GO:0005089, Rho guanyl-nucleotide exchange factor activity;GO:0005488, binding;GO:0005515, protein binding;GO:0005575, cellular_component;GO:0005622, intracellular;GO:0…	XP_030856216.1 rho guanine nucleotide exchange factor 3 isoform X2 [Strongylocentrotus purpuratus] 9.79e-15	-
TRINITY_DN10939_c0_g1	3.97436	14.0398	-1.82073	0.000107647	0.000783296	down	-	-	-	-	-	-	-	-
TRINITY_DN11640_c0_g1	3.38822	14.8704	-2.13385	0.00154458	0.00819653	down	cd08295, double_bond_reductase_like, Arabidopsis alkenal double bond reductase and leukotriene B4 12-hydroxydehydrogenase. This group includes proteins identified as the Arabidopsis alkenal double bond reductase and leukotriene B4 12-hydroxydehydrogenase. The Arabidopsis enzyme, a member of the medium chain dehydrogenase/reductase family, catalyzes the reduction of 7-8-double bond of phenylpropan…	pfam16884, ADH_N_2, N-terminal domain of oxidoreductase. N-terminal region of oxidoreductase and prostaglandin reductase and alcohol dehydrogenase. 1.10e-08	-	KOG1196, KOG1196, KOG1196, Predicted NAD-dependent oxidoreductase [General function prediction only]. 3.07e-55	sp|Q39173|P2_ARATH NADP-dependent alkenal double bond reductase P2 OS=Arabidopsis thaliana GN=P2 PE=2 SV=2 3.60e-07	-	CAF1211603.1 unnamed protein product [Didymodactylos carnosus] >CAF3975559.1 unnamed protein product [Didymodactylos carnosus] 4.42e-47	-
TRINITY_DN3228_c0_g1	80.5874	213.055	-1.4026	0.000754308	0.00442161	down	cd12188, SDH, Saccharopine Dehydrogenase NAD-binding and catalytic domains. Saccharopine Dehydrogenase (SDH) catalyzes the final step in the reversible NAD-dependent oxidative deamination of saccharopine to alpha-ketoglutarate and lysine, in the alpha-aminoadipate pathway of L-lysine biosynthesis. SHD is structurally related to formate dehydrogenase and similar enzymes, having a 2-domain structur…	-	K00290-ko01230 Biosynthesis of amino acids;ko00300 Lysine biosynthesis;ko00310 Lysine degradation	KOG0172, KOG0172, KOG0172, Lysine-ketoglutarate reductase/saccharopine dehydrogenase [Amino acid transport and metabolism]. 5.46e-11	sp|Q7SFX6|LYS1_NEUCR Saccharopine dehydrogenase [NAD(+), L-lysine-forming] OS=Neurospora crassa (strain ATCC 24698 / 74-OR23-1A / CBS 708.71 / DSM 1257 / FGSC 987) GN=NCU03118 PE=3 SV=1 5.61e-112	GO:0003674, molecular_function;GO:0003676, nucleic acid binding;GO:0003723, RNA binding;GO:0003729, mRNA binding;GO:0003824, catalytic activity;GO:0004753, saccharopine dehydrogenase activity;GO:0004754, saccharopine dehydrogenase (NAD+, L-lysine-forming) activity;GO:0005488, binding;GO:0005575, cellular_component;GO:0005622, intracellular;GO:0005623, cell;GO:0005737, cytoplasm;GO:0006082, organi…	KAJ3025773.1 Saccharopine dehydrogenase [Siphonaria sp. JEL0065] 8.50e-102	-
TRINITY_DN13726_c5_g7	98.2509	25.6215	1.93911	4.13807e-09	6.64811e-08	up	cd09535, SAM_BOI-like_fungal, SAM domain of BOI-like fungal subfamily. SAM (sterile alpha motif) domain of BOI-like fungal subfamily is a potential protein-protein interaction domain. Proteins of this subfamily are apparently scaffold proteins, since most contain SH3 and PH domains, which are also protein-protein interaction domains, in addition to SAM domain. BOI-like proteins participate in cel…	-	-	-	sp|O74653|POB1_SCHPO Protein pob1 OS=Schizosaccharomyces pombe (strain 972 / ATCC 24843) GN=pob1 PE=1 SV=1 4.11e-09	-	-	-
TRINITY_DN25545_c0_g1	1.48556	0.0432753	5.10132	0.000800612	0.00464445	up	-	pfam01915, Glyco_hydro_3_C, Glycosyl hydrolase family 3 C-terminal domain. This domain is involved in catalysis and may be involved in binding beta-glucan. This domain is found associated with pfam00933. 2.95e-26	K05349-ko00500 Starch and sucrose metabolism;ko00940 Phenylpropanoid biosynthesis;ko00460 Cyanoamino acid metabolism	-	sp|P14002|BGLB_CLOTH Thermostable beta-glucosidase B OS=Clostridium thermocellum (strain ATCC 27405 / DSM 1237 / NBRC 103400 / NCIMB 10682 / NRRL B-4536 / VPI 7372) GN=bglB PE=1 SV=2 8.73e-44	-	MCL4141981.1 hypothetical protein [Idotea baltica] 1.84e-40	-
TRINITY_DN13254_c0_g1	0.0228234	23.8095	-10.0268	4.47142e-16	1.54172e-14	down	-	-	-	-	-	-	-	-
TRINITY_DN12227_c0_g1	65.3233	142.884	-1.12918	0.00540956	0.0238069	down	cd00775, LysRS_core, Lys_tRNA synthetase (LysRS) class II core domain. Class II LysRS is a dimer which attaches a lysine to the 3' OH group of ribose of the appropriate tRNA. Its assignment to class II aaRS is based upon its structure and the presence of three characteristic sequence motifs in the core domain. It is found in eukaryotes as well as some prokaryotes and archaea. However, LysRS belon…	pfam00152, tRNA-synt_2, tRNA synthetases class II (D, K and N). 7.59e-40	K04567-ko00970 Aminoacyl-tRNA biosynthesis	KOG1885, KOG1885, KOG1885, Lysyl-tRNA synthetase (class II) [Translation, ribosomal structure and biogenesis]. 0.0	sp|Q9UUE6|SYKC_SCHPO Lysine--tRNA ligase, cytoplasmic OS=Schizosaccharomyces pombe (strain 972 / ATCC 24843) GN=krs1 PE=3 SV=1 0.0	GO:0002181, cytoplasmic translation;GO:0003674, molecular_function;GO:0003676, nucleic acid binding;GO:0003723, RNA binding;GO:0003729, mRNA binding;GO:0003824, catalytic activity;GO:0004812, aminoacyl-tRNA ligase activity;GO:0004824, lysine-tRNA ligase activity;GO:0005488, binding;GO:0005575, cellular_component;GO:0005622, intracellular;GO:0005623, cell;GO:0005737, cytoplasm;GO:0006082, organic …	KAJ3007247.1 Lysine--tRNA ligase [Siphonaria sp. JEL0065] 4.83e-199	PREDICTED: Branchiostoma belcheri lysine--tRNA ligase-like (LOC109473831), transcript variant X2, mRNA 4.86e-29
TRINITY_DN13646_c1_g1	3.62472	0.107117	5.08061	0.00370392	0.017294	up	-	-	-	-	-	-	-	-
TRINITY_DN13646_c1_g2	4.45564	0.259143	4.10381	1.56438e-09	2.66619e-08	up	-	-	-	-	-	-	-	-
TRINITY_DN6400_c0_g1	0.243929	4.24444	-4.12104	0.00460429	0.0208184	down	-	-	-	-	-	-	-	-
TRINITY_DN221_c0_g1	32.4363	12.0918	1.42358	0.000215887	0.0014684	up	-	pfam08172, CASP_C, CASP C terminal. This domain is the C-terminal region of the CASP family of proteins. It is a Golgi membrane protein which is thought to have a role in vesicle transport. 1.39e-72	-	KOG0963, KOG0963, KOG0963, Transcription factor/CCAAT displacement protein CDP1 [Transcription]. 2.05e-61	sp|O59795|CASP_SCHPO Protein CASP OS=Schizosaccharomyces pombe (strain 972 / ATCC 24843) GN=coy1 PE=3 SV=1 8.49e-58	GO:0000139, Golgi membrane;GO:0005575, cellular_component;GO:0005622, intracellular;GO:0005623, cell;GO:0005737, cytoplasm;GO:0005794, Golgi apparatus;GO:0006810, transport;GO:0008150, biological_process;GO:0012505, endomembrane system;GO:0016020, membrane;GO:0016192, vesicle-mediated transport;GO:0031090, organelle membrane;GO:0031984, organelle subcompartment;GO:0043226, organelle;GO:0043227, m…	XP_037092154.1 protein CASP-like [Pollicipes pollicipes] 1.70e-47	-
TRINITY_DN14155_c0_g11	14.8796	6.00199	1.30982	0.00340521	0.0160892	up	-	pfam06985, HET, Heterokaryon incompatibility protein (HET). This family represents a conserved region approximately 150 residues long within various heterokaryon incompatibility proteins that seem to be restricted to ascomycete fungi. Genetic differences in specific het genes prevent a viable heterokaryotic fungal cell from being formed by the fusion of filaments from two different wild-type stra…	-	-	sp|Q9UV10|HET6_NEUCR Heterokaryon incompatibility protein 6, OR allele OS=Neurospora crassa (strain ATCC 24698 / 74-OR23-1A / CBS 708.71 / DSM 1257 / FGSC 987) GN=het-6 PE=4 SV=1 6.55e-08	-	KAI1691421.1 heterokaryon incompatibility protein (HET) domain-containing protein [Ditylenchus destructor] 2.88e-08	-
TRINITY_DN13800_c0_g5	14.6227	3.78664	1.94922	0.00301435	0.0145179	up	-	-	-	-	-	-	-	-
TRINITY_DN13800_c0_g8	69.4362	264.815	-1.93122	0.000144189	0.00102101	down	-	pfam13883, Pyrid_oxidase_2, Pyridoxamine 5'-phosphate oxidase. 7.04e-12	-	-	-	-	-	-
TRINITY_DN14048_c0_g1	54.4447	26.9568	1.01415	0.00450042	0.0203967	up	cd18008, DEXDc_SHPRH-like, DEXH-box helicase domain of SHPRH-like proteins. The SHPRH-like subgroup belongs to the DEAD-like helicase superfamily, a diverse family of proteins involved in ATP-dependent RNA or DNA unwinding. This domain contains the ATP-binding region. 5.71e-26	pfam00176, SNF2_N, SNF2 family N-terminal domain. This domain is found in proteins involved in a variety of processes including transcription regulation (e.g., SNF2, STH1, brahma, MOT1), DNA repair (e.g., ERCC6, RAD16, RAD5), DNA recombination (e.g., RAD54), and chromatin unwinding (e.g., ISWI) as well as a variety of other proteins with little functional information (e.g., lodestar, ETL1). 6.20e…	-	KOG1001, KOG1001, KOG1001, Helicase-like transcription factor HLTF/DNA helicase RAD5, DEAD-box superfamily [Transcription, Replication, recombination and repair]. 1.12e-07	sp|Q6PCN7|HLTF_MOUSE Helicase-like transcription factor OS=Mus musculus GN=Hltf PE=1 SV=1 1.92e-25	-	XP_007502127.1 PREDICTED: helicase-like transcription factor isoform X3 [Monodelphis domestica] 7.45e-26	-
TRINITY_DN10405_c0_g1	19.4346	6.04433	1.68498	0.000172662	0.00120175	up	-	-	-	-	-	-	-	-
TRINITY_DN8995_c0_g1	0.0916418	1.29762	-3.82372	0.0036784	0.0172047	down	-	-	-	-	-	-	-	-
TRINITY_DN4800_c0_g1	2.4747	0.552622	2.16289	0.0110064	0.0425297	up	-	-	-	-	-	-	-	-
TRINITY_DN7416_c0_g1	70.7875	20.7804	1.76827	4.93052e-08	6.86343e-07	up	-	pfam01328, Peroxidase_2, Peroxidase, family 2. The peroxidases in this family do not have similarity to other peroxidases. 1.32e-31	-	-	sp|Q00668|STCC_EMENI Putative sterigmatocystin biosynthesis peroxidase stcC OS=Emericella nidulans (strain FGSC A4 / ATCC 38163 / CBS 112.46 / NRRL 194 / M139) GN=stcC PE=3 SV=2 1.27e-22	-	CAF0979335.1 unnamed protein product [Adineta ricciae] >CAF1114012.1 unnamed protein product [Adineta ricciae] 7.86e-16	-
TRINITY_DN13568_c0_g1	87.1222	284.923	-1.70946	0.000431048	0.00269095	down	cd00517, ATPS, ATP-sulfurylase. ATP-sulfurylase (ATPS), also known as sulfate adenylate transferase, catalyzes the transfer of an adenylyl group from ATP to sulfate, forming adenosine 5'-phosphosulfate (APS). This reaction is generally accompanied by a further reaction, catalyzed by APS kinase, in which APS is phosphorylated to yield 3'-phospho-APS (PAPS). In some organisms the APS kinase is a se…	pfam01747, ATP-sulfurylase, ATP-sulfurylase. This domain is the catalytic domain of ATP-sulfurylase or sulfate adenylyltransferase EC:2.7.7.4 some of which are part of a bifunctional polypeptide chain associated with adenosyl phosphosulphate (APS) kinase pfam01583. Both enzymes are required for PAPS (phosphoadenosine-phosphosulfate) synthesis from inorganic sulphate. ATP sulfurylase catalyzes the…	K00958-ko00920 Sulfur metabolism;ko00230 Purine metabolism;ko00261 Monobactam biosynthesis;ko00450 Selenocompound metabolism	KOG0636, KOG0636, KOG0636, ATP sulfurylase (sulfate adenylyltransferase) [Inorganic ion transport and metabolism]. 5.22e-06	sp|Q2H454|MET3_CHAGB Sulfate adenylyltransferase OS=Chaetomium globosum (strain ATCC 6205 / CBS 148.51 / DSM 1962 / NBRC 6347 / NRRL 1970) GN=MET3 PE=3 SV=1 0.0	GO:0000096, sulfur amino acid metabolic process;GO:0000103, sulfate assimilation;GO:0003674, molecular_function;GO:0003824, catalytic activity;GO:0004779, sulfate adenylyltransferase activity;GO:0004781, sulfate adenylyltransferase (ATP) activity;GO:0005575, cellular_component;GO:0005622, intracellular;GO:0005623, cell;GO:0005737, cytoplasm;GO:0005739, mitochondrion;GO:0006082, organic acid metab…	KAJ3015705.1 Sulfate adenylyltransferase [Siphonaria sp. JEL0065] 3.66e-270	-
TRINITY_DN13811_c0_g1	63.7316	160.902	-1.33611	0.00421503	0.019305	down	cd00200, WD40, WD40 domain, found in a number of eukaryotic proteins that cover a wide variety of functions including adaptor/regulatory modules in signal transduction, pre-mRNA processing and cytoskeleton assembly; typically contains a GH dipeptide 11-24 residues from its N-terminus and the WD dipeptide at its C-terminus and is 40 residues long, hence the name WD40; between GH and WD lies a cons…	pfam00153, Mito_carr, Mitochondrial carrier protein. 2.52e-08	K10259-ko04111 Cell cycle - yeast;ko04120 Ubiquitin mediated proteolysis	KOG0274, KOG0274, KOG0274, Cdc4 and related F-box and WD-40 proteins [General function prediction only]. 1.19e-14	sp|A2QCU8|SCONB_ASPNC Probable E3 ubiquitin ligase complex SCF subunit sconB OS=Aspergillus niger (strain CBS 513.88 / FGSC A1513) GN=sconB PE=3 SV=1 5.93e-13	GO:0000082, G1/S transition of mitotic cell cycle;GO:0000083, regulation of transcription involved in G1/S transition of mitotic cell cycle;GO:0000151, ubiquitin ligase complex;GO:0000152, nuclear ubiquitin ligase complex;GO:0000209, protein polyubiquitination;GO:0000278, mitotic cell cycle;GO:0003674, molecular_function;GO:0005488, binding;GO:0005515, protein binding;GO:0005575, cellular_compone…	XP_024217827.1 putative tricarboxylate transport protein, mitochondrial [Halyomorpha halys] 8.26e-44	-
TRINITY_DN7827_c0_g1	2.6633	10.6799	-2.00361	4.79281e-06	4.78819e-05	down	-	pfam07885, Ion_trans_2, Ion channel. This family includes the two membrane helix type ion channels found in bacteria. 3.41e-09	-	KOG1418, KOG1418, KOG1418, Tandem pore domain K+ channel [Inorganic ion transport and metabolism]. 1.01e-06	sp|P40310|TOK1_YEAST Outward-rectifier potassium channel TOK1 OS=Saccharomyces cerevisiae (strain ATCC 204508 / S288c) GN=TOK1 PE=1 SV=1 8.19e-53	-	KAJ3031733.1 Potassium channel [Siphonaria sp. JEL0065] 5.86e-13	-
TRINITY_DN12128_c0_g1	132.288	19.7746	2.74196	8.14221e-15	2.57015e-13	up	cd05490, Cathepsin_D2, Cathepsin_D2, pepsin family of proteinases. Cathepsin D is the major aspartic proteinase of the lysosomal compartment where it functions in protein catabolism. It is a member of the pepsin family of proteinases. This enzyme is distinguished from other members of the pepsin family by two features that are characteristic of lysosomal hydrolases. First, mature Cathepsin D is f…	pfam00026, Asp, Eukaryotic aspartyl protease. Aspartyl (acid) proteases include pepsins, cathepsins, and renins. Two-domain structure, probably arising from ancestral duplication. This family does not include the retroviral nor retrotransposon proteases (pfam00077), which are much smaller and appear to be homologous to a single domain of the eukaryotic asp proteases. 1.65e-15	-	-	sp|D4DEN7|CARP_TRIVH Probable vacuolar protease A OS=Trichophyton verrucosum (strain HKI 0517) GN=PEP2 PE=3 SV=1 1.87e-19	-	XP_013109282.1 PREDICTED: lysosomal aspartic protease-like [Stomoxys calcitrans] 9.41e-21	-
TRINITY_DN14309_c2_g2	2692.72	6831.67	-1.34317	0.00159469	0.00843245	down	-	pfam00732, GMC_oxred_N, GMC oxidoreductase. This family of proteins bind FAD as a cofactor. 4.50e-13	-	KOG1238, KOG1238, KOG1238, Glucose dehydrogenase/choline dehydrogenase/mandelonitrile lyase (GMC oxidoreductase family) [General function prediction only]. 7.22e-13	sp|Q00922|ALOX_CANBO Alcohol oxidase OS=Candida boidinii GN=AOD1 PE=1 SV=1 2.99e-109	-	XP_015762929.1 PREDICTED: choline dehydrogenase, mitochondrial-like [Acropora digitifera] 1.80e-30	-
TRINITY_DN14309_c2_g4	158.414	982.44	-2.63267	4.28724e-05	0.00034275	down	-	-	-	-	-	-	-	-
TRINITY_DN13698_c3_g1	36.9109	5.86053	2.65495	2.00768e-11	4.33342e-10	up	-	-	-	-	sp|Q9UTS5|ZAS1_SCHPO Zinc finger protein zas1 OS=Schizosaccharomyces pombe (strain 972 / ATCC 24843) GN=zas1 PE=2 SV=1 1.50e-06	-	-	-
TRINITY_DN25729_c0_g1	1.6992	44.1785	-4.70042	8.76072e-24	6.01048e-22	down	-	-	-	-	-	-	-	-
TRINITY_DN13774_c0_g1	74.0762	21.8554	1.76102	2.52998e-09	4.18458e-08	up	cd07203, cPLA2_Fungal_PLB, Fungal Phospholipase B-like; cPLA2 GrpIVA homologs; catalytic domain. Fungal phospholipase B are Group IV cPLA2 homologs. Aspergillus PLA2 is Ca-dependent, yet it does not contain a C2 domain. PLB deacylates both sn-1 and sn-2 chains of phospholipids and are abundantly expressed in fungi. It shows lysophospholipase (lysoPL) and transacylase activities. The active site r…	pfam01735, PLA2_B, Lysophospholipase catalytic domain. This family consists of Lysophospholipase / phospholipase B EC:3.1.1.5 and cytosolic phospholipase A2 EC:3.1.4 which also has a C2 domain pfam00168. Phospholipase B enzymes catalyze the release of fatty acids from lysophsopholipids and are capable in vitro of hydrolysing all phospholipids extractable form yeast cells. Cytosolic phospholipase …	-	KOG1325, KOG1325, KOG1325, Lysophospholipase [Lipid transport and metabolism]. 2.45e-143	sp|O42790|PLB_NEUCR Lysophospholipase OS=Neurospora crassa (strain ATCC 24698 / 74-OR23-1A / CBS 708.71 / DSM 1257 / FGSC 987) GN=lpl PE=3 SV=2 0.0	-	CAF1311760.1 unnamed protein product [Adineta steineri] 2.39e-91	-
TRINITY_DN8723_c0_g1	4.113	0.145031	4.82576	6.42049e-09	1.0086e-07	up	-	pfam07287, AtuA, Acyclic terpene utilisation family protein AtuA. This family consists of several bacterial and plant proteins of around 400 residues in length. One member of this family has been characterized in Pseudomonas citronellolis as AtuA, a member of a gene cluster that is essential for the acyclic terpene utilisation (Atu) pathway. 1.61e-93	-	-	-	-	UJR17215.1 hypothetical protein I4U23_004110 [Adineta vaga] 1.22e-57	-
TRINITY_DN9355_c0_g1	2.19717	8.48397	-1.94909	1.59128e-05	0.00014313	down	-	pfam02129, Peptidase_S15, X-Pro dipeptidyl-peptidase (S15 family). 5.92e-22	-	-	sp|Q9L9D7|COCE_RHOSM Cocaine esterase OS=Rhodococcus sp. (strain MB1 Bresler) GN=cocE PE=1 SV=1 1.55e-20	-	XP_028402708.1 uncharacterized protein LOC114525526 [Dendronephthya gigantea] 4.23e-158	-
TRINITY_DN14747_c0_g1	5.10994	0.679809	2.91011	1.82432e-05	0.000161925	up	-	-	-	-	-	-	-	-
TRINITY_DN10627_c0_g1	32.2197	175.499	-2.44545	1.21859e-05	0.000112159	down	-	-	-	-	-	-	-	-
TRINITY_DN19756_c0_g1	0.0001	2.81733	-14.782	0.000373928	0.00238756	down	-	-	-	-	-	-	-	-
TRINITY_DN21198_c0_g1	0.344814	10.2143	-4.88863	4.40798e-07	5.29233e-06	down	-	-	-	-	sp|Q936X2|ATZF_PSESD Allophanate hydrolase OS=Pseudomonas sp. (strain ADP) GN=atzF PE=1 SV=1 1.02e-35	-	XP_044742466.1 urea amidolyase-like [Chrysoperla carnea] 3.13e-35	-
TRINITY_DN13930_c0_g2	34.3431	1.72125	4.31849	1.97446e-05	0.000172743	up	-	-	-	-	-	-	-	-
TRINITY_DN10530_c0_g1	7.95757	19.3386	-1.28109	0.003459	0.0162975	down	cd17476, MFS_Amf1_MDR_like, Saccharomyces cerevisiae low affinity ammonium transporter Amf1p/YOR378W, aminotriazole resistance protein Atr1p, and similar transporters of the Major Facilitator Superfamily. Saccharomyces cerevisiae Amf1p/Ammonium Facilitator 1/YOR378W functions as a low affinity NH4+ transporter. S. cerevisiae aminotriazole resistance protein (Atr1p) is required for controlling sen…	pfam06419, COG6, Conserved oligomeric complex COG6. COG6 is a component of the conserved oligomeric golgi complex, which is composed of eight different subunits and is required for normal golgi morphology and localization. 0.0	-	KOG3758, KOG3758, KOG3758, Uncharacterized conserved protein [Function unknown]. 3.87e-77	sp|Q2HH52|COG6_CHAGB Conserved oligomeric Golgi complex subunit 6 OS=Chaetomium globosum (strain ATCC 6205 / CBS 148.51 / DSM 1962 / NBRC 6347 / NRRL 1970) GN=COG6 PE=3 SV=1 0.0	GO:0005575, cellular_component;GO:0005622, intracellular;GO:0005623, cell;GO:0005737, cytoplasm;GO:0005794, Golgi apparatus;GO:0006810, transport;GO:0006886, intracellular protein transport;GO:0006891, intra-Golgi vesicle-mediated transport;GO:0008104, protein localization;GO:0008150, biological_process;GO:0009987, cellular process;GO:0012505, endomembrane system;GO:0015031, protein transport;GO:…	XP_013406875.1 conserved oligomeric Golgi complex subunit 6 [Lingula anatina] 2.85e-80	-
TRINITY_DN12675_c0_g2	41.0643	3.45485	3.57119	4.58597e-22	2.66959e-20	up	cd17356, MFS_HXT, Fungal Hexose transporter subfamily of the Major Facilitator Superfamily of transporters and similar proteins. The fungal hexose transporter (HXT) subfamily is comprised of functionally redundant proteins that function mainly in the transport of glucose, as well as other sugars such as galactose and fructose. Saccharomyces cerevisiae has 20 genes that encode proteins in this fam…	pfam00083, Sugar_tr, Sugar (and other) transporter. 1.06e-35	-	KOG0254, KOG0254, KOG0254, Predicted transporter (major facilitator superfamily) [General function prediction only]. 1.66e-37	sp|A2QQV6|QUTD_ASPNC Probable quinate permease OS=Aspergillus niger (strain CBS 513.88 / FGSC A1513) GN=qutD PE=3 SV=1 9.77e-56	-	CAF3796445.1 unnamed protein product [Rotaria sp. Silwood1] 2.52e-37	-
TRINITY_DN12956_c0_g1	13.2888	0.989194	3.74781	5.08021e-17	1.92976e-15	up	cd11060, CYP57A1-like, cytochrome P450 family 57, subfamily A, polypeptide 1 and similar cytochrome P450s. This family is composed of fungal cytochrome P450s including: Nectria haematococca cytochrome P450 57A1 (CYP57A1), also called pisatin demethylase, which detoxifies the phytoalexin pisatin; Penicillium aethiopicum P450 monooxygenase gsfF, also called griseofulvin synthesis protein F, which c…	pfam00067, p450, Cytochrome P450. Cytochrome P450s are haem-thiolate proteins involved in the oxidative degradation of various compounds. They are particularly well known for their role in the degradation of environmental toxins and mutagens. They can be divided into 4 classes, according to the method by which electrons from NAD(P)H are delivered to the catalytic site. Sequence conservation is re…	-	KOG0158, KOG0158, KOG0158, Cytochrome P450 CYP3/CYP5/CYP6/CYP9 subfamilies [Secondary metabolites biosynthesis, transport and catabolism]. 3.89e-15	sp|Q12645|PID9_FUSSO Pisatin demethylase OS=Fusarium solani subsp. pisi GN=PDAT9 PE=3 SV=1 1.03e-50	-	UPN65130.1 cytochrome P450-13, partial [Laodelphax striatellus] 1.35e-24	-
TRINITY_DN9299_c0_g1	0.0932657	6.75724	-6.17894	4.29102e-05	0.000342848	down	-	-	-	-	-	-	-	-
TRINITY_DN13337_c0_g1	3.1233	9.63932	-1.62586	0.000763111	0.00445961	down	cd17323, MFS_Tpo1_MDR_like, Yeast Polyamine transporter 1 (Tpo1) and similar multidrug resistance (MDR) transporters of the Major Facilitator Superfamily. This family is composed of fungal multidrug resistance (MDR) transporters including several proteins from Saccharomyces cerevisiae such as polyamine transporters 1-4 (Tpo1-4), quinidine resistance proteins 1-3 (Qdr1-3), dityrosine transporter 1…	-	-	-	sp|P38776|YHK8_YEAST Probable drug/proton antiporter YHK8 OS=Saccharomyces cerevisiae (strain ATCC 204508 / S288c) GN=YHK8 PE=1 SV=1 5.59e-70	-	UJR19438.1 hypothetical protein I4U23_022568 [Adineta vaga] 2.99e-56	-
TRINITY_DN7239_c0_g1	28.4393	111.389	-1.96965	2.86475e-05	0.000240915	down	cd16929, HATPase_PDK-like, Histidine kinase-like ATPase domain of pyruvate dehydrogenase kinase, branched-chain alpha-ketoacid dehydrogenase kinase and related domains. This family includes the histidine kinase-like ATPase (HATPase) domains of all four PDK isoforms (pyruvate dehydrogenase kinases 1-4) that have been described in mammals, and other PDKs including Saccharomyces Pkp1p and Pkp2p. PDK…	pfam10436, BCDHK_Adom3, Mitochondrial branched-chain alpha-ketoacid dehydrogenase kinase. Catabolism and synthesis of leucine, isoleucine and valine are finely balanced, allowing the body to make the most of dietary input but removing excesses to prevent toxic build-up of their corresponding keto-acids. This is the butyryl-CoA dehydrogenase, subunit A domain 3, a largely alpha-helical bundle of t…	-	KOG0787, KOG0787, KOG0787, Dehydrogenase kinase [Signal transduction mechanisms]. 7.93e-45	sp|O14874|BCKD_HUMAN [3-methyl-2-oxobutanoate dehydrogenase [lipoamide]] kinase, mitochondrial OS=Homo sapiens GN=BCKDK PE=1 SV=2 1.95e-57	GO:0003674, molecular_function;GO:0003824, catalytic activity;GO:0004672, protein kinase activity;GO:0004740, pyruvate dehydrogenase (acetyl-transferring) kinase activity;GO:0005575, cellular_component;GO:0005622, intracellular;GO:0005623, cell;GO:0005737, cytoplasm;GO:0005739, mitochondrion;GO:0006464, cellular protein modification process;GO:0006468, protein phosphorylation;GO:0006793, phosphor…	XP_028400478.1 3-methyl-2-oxobutanoate dehydrogenase [lipoamide] kinase, mitochondrial-like isoform X1 [Dendronephthya gigantea] 3.34e-62	-
TRINITY_DN9540_c0_g1	4.6741	1.96526	1.24997	0.00592268	0.0256745	up	-	-	-	-	-	-	-	-
TRINITY_DN13986_c2_g1	16.5724	4.36957	1.92322	1.57514e-06	1.71923e-05	up	-	-	-	-	-	-	-	-
TRINITY_DN320_c0_g1	3.33992	0.160723	4.37717	1.5618e-05	0.00014095	up	cd03457, intradiol_dioxygenase_like, Intradiol dioxygenase supgroup. Intradiol dioxygenases catalyze the critical ring-cleavage step in the conversion of catecholate derivatives to citric acid cycle intermediates. They break the catechol C1-C2 bond and utilize Fe3+, as opposed to the extradiol-cleaving enzymes which break the C2-C3 or C1-C6 bond and utilize Fe2+ and Mn+. The family contains catec…	-	-	-	-	-	OQV26249.1 hypothetical protein BV898_00367 [Hypsibius exemplaris] 3.21e-75	-
TRINITY_DN10648_c0_g1	13.9111	4.54667	1.61335	2.29691e-06	2.42819e-05	up	cd05926, FACL_fum10p_like, Subfamily of fatty acid CoA ligase (FACL) similar to Fum10p of Gibberella moniliformis. FACL catalyzes the formation of fatty acyl-CoA in a two-step reaction: the formation of a fatty acyl-AMP molecule as an intermediate, followed by the formation of a fatty acyl-CoA. This is a required step before free fatty acids can participate in most catabolic and anabolic reaction…	pfam00501, AMP-binding, AMP-binding enzyme. 4.92e-24	-	KOG1176, KOG1176, KOG1176, Acyl-CoA synthetase [Lipid transport and metabolism]. 3.29e-45	sp|O74976|FAT2_SCHPO Putative peroxisomal-coenzyme A synthetase OS=Schizosaccharomyces pombe (strain 972 / ATCC 24843) GN=SPCC1827.03c PE=1 SV=1 7.78e-46	-	CAF1054395.1 unnamed protein product [Adineta ricciae] 2.54e-282	-
TRINITY_DN13467_c1_g1	16.3138	3.14024	2.37715	2.71518e-14	8.13163e-13	up	sd00045, ANK, ankyrin repeats. Ankyrin repeats are one of the most abundant repeat motifs, and generally function as scaffolds for protein-protein interactions in processes including cell cycle, transcriptional regulation, signal transduction, vesicular trafficking, and inflammatory response. Although predominantly found in eukaryotic proteins, they are also found in some bacterial and viral prot…	pfam14420, Clr5, Clr5 domain. This domain is found at the N-terminus of the Clr5 protein which has been shown to be involved in silencing in fission yeast. This domain has been found to often be associated with proteins that contain ankyrin repeats and large regions of disordered sequence. 1.09e-08	-	KOG4177, KOG4177, KOG4177, Ankyrin [Cell wall/membrane/envelope biogenesis]. 1.12e-08	sp|D7UQ40|SOL5_ALTSO Bifunctional solanapyrone synthase OS=Alternaria solani GN=sol5 PE=1 SV=1 2.40e-27	-	CAF4004686.1 unnamed protein product [Adineta steineri] 1.51e-34	-
TRINITY_DN10203_c0_g1	1.69049	0.104188	4.02018	4.13423e-06	4.18938e-05	up	-	-	-	-	sp|P28348|NIRA_EMENI Nitrogen assimilation transcription factor nirA OS=Emericella nidulans (strain FGSC A4 / ATCC 38163 / CBS 112.46 / NRRL 194 / M139) GN=nirA PE=3 SV=1 5.33e-13	-	-	-
TRINITY_DN9575_c0_g1	61.1361	130.507	-1.09403	0.00374404	0.0174631	down	-	-	-	-	sp|Q9UUK0|PDXH_SCHPO Pyridoxamine 5'-phosphate oxidase C1952.08c homolog OS=Schizosaccharomyces pombe (strain 972 / ATCC 24843) GN=SPAC1952.08c PE=3 SV=1 8.82e-25	GO:0003674, molecular_function;GO:0003824, catalytic activity;GO:0004733, pyridoxamine-phosphate oxidase activity;GO:0006081, cellular aldehyde metabolic process;GO:0006725, cellular aromatic compound metabolic process;GO:0006732, coenzyme metabolic process;GO:0006766, vitamin metabolic process;GO:0006767, water-soluble vitamin metabolic process;GO:0006793, phosphorus metabolic process;GO:0006796…	-	-
TRINITY_DN11116_c0_g1	1.01469	10.1083	-3.31642	9.85711e-10	1.73493e-08	down	cd12148, fungal_TF_MHR, fungal transcription factor regulatory middle homology region. This domain is present in the large family of fungal zinc cluster transcription factors that contain an N-terminal GAL4-like C6 zinc binuclear cluster DNA-binding domain. Examples of members of this large fungal group are the following Saccharomyces cerevisiae transcription factors, GAL4, STB5, DAL81, CAT8, RDR…	-	-	-	sp|P40467|ASG1_YEAST Activator of stress genes 1 OS=Saccharomyces cerevisiae (strain ATCC 204508 / S288c) GN=ASG1 PE=1 SV=1 5.15e-17	-	-	-
TRINITY_DN9443_c0_g1	0.297596	5.53635	-4.21751	8.58058e-09	1.32472e-07	down	cd07710, arylsulfatase_Sdsa1-like_MBL-fold, Pseudomonas aeruginosa arylsulfatase SdsA1, Pseudomonas sp. DSM6611 arylsulfatase Pisa1, and related proteins; MBL-fold metallo-hydrolase domain. Arylsulfatase (also known as aryl-sulfate sulfohydrolase, EC 3.1.6.1). Pseudomonas aeruginosa SdsA1 is a secreted SDS hydrolase that allows the bacterium to use primary sulfates such as the detergent SDS commo…	pfam14863, Alkyl_sulf_dimr, Alkyl sulfatase dimerization. This domain is found in alkyl sulfatases such as the Pseudomonas aeruginosa SDS hydrolase, where it acts as a dimerization domain. 7.37e-40	-	-	sp|P32717|YJCS_ECOLI Putative alkyl/aryl-sulfatase YjcS OS=Escherichia coli (strain K12) GN=yjcS PE=1 SV=2 5.10e-121	-	MCL4110173.1 hypothetical protein [Idotea baltica] 8.00e-100	-
TRINITY_DN12273_c0_g1	1.23246	8.47455	-2.78159	4.70133e-05	0.000371875	down	-	-	-	-	sp|A1DPF0|PLYC_NEOFI Probable pectate lyase C OS=Neosartorya fischeri (strain ATCC 1020 / DSM 3700 / FGSC A1164 / NRRL 181) GN=plyC PE=3 SV=1 8.11e-170	-	-	-
TRINITY_DN9689_c0_g1	22.7148	91.9494	-2.01721	2.37539e-08	3.42357e-07	down	cd16032, choline-sulfatase, choline-sulfatase. Choline-sulphatase is involved in the synthesis of glycine betaine from choline. The symbiotic soil bacterium Rhizobium meliloti can synthesize glycine betaine from choline-O-sulphate and choline to protect itself from osmotic stress. This biosynthetic pathway is encoded by the betICBA locus, which comprises a regulatory gene, betI, and three structu…	pfam00884, Sulfatase, Sulfatase. 6.70e-20	-	KOG3867, KOG3867, KOG3867, Sulfatase [General function prediction only]. 4.71e-23	sp|O69787|BETC_RHIME Choline-sulfatase OS=Rhizobium meliloti (strain 1021) GN=betC PE=1 SV=2 4.58e-137	-	CAF1044728.1 unnamed protein product [Rotaria sp. Silwood1] >CAF1411248.1 unnamed protein product [Rotaria sp. Silwood1] >CAF3588540.1 unnamed protein product [Rotaria sp. Silwood1] >CAF4840909.1 unnamed protein product [Rotaria sp. Silwood1] 7.24e-198	-
TRINITY_DN14205_c0_g1	77.694	38.7897	1.00213	0.00474833	0.0213619	up	cd09097, Deadenylase_CCR4, C-terminal deadenylase domain of CCR4 and related domains. This subfamily contains the C-terminal catalytic domain of the deadenylases, Saccharomyces cerevisiae Ccr4p and two vertebrate homologs (CCR4a and CCR4b), and related domains. CCR4 belongs to the large EEP (exonuclease/endonuclease/phosphatase) superfamily that contains functionally diverse enzymes that share a …	-	K12603-ko03018 RNA degradation	KOG0620, KOG0620, KOG0620, Glucose-repressible alcohol dehydrogenase transcriptional effector CCR4 and related proteins [Transcription]. 2.16e-43	sp|Q9C2R2|CCR4_NEUCR Glucose-repressible alcohol dehydrogenase transcriptional effector OS=Neurospora crassa (strain ATCC 24698 / 74-OR23-1A / CBS 708.71 / DSM 1257 / FGSC 987) GN=ccr4 PE=3 SV=2 0.0	GO:0000075, cell cycle checkpoint;GO:0000076, DNA replication checkpoint;GO:0000175, 3'-5'-exoribonuclease activity;GO:0000288, nuclear-transcribed mRNA catabolic process, deadenylation-dependent decay;GO:0000289, nuclear-transcribed mRNA poly(A) tail shortening;GO:0000932, P-body;GO:0000956, nuclear-transcribed mRNA catabolic process;GO:0003674, molecular_function;GO:0003824, catalytic activity;…	KAJ3029784.1 Glucose-repressible alcohol dehydrogenase transcriptional effector [Siphonaria sp. JEL0065] 1.42e-104	-
TRINITY_DN14208_c1_g1	236.167	103.842	1.18542	1.45771e-05	0.000132534	up	sd00045, ANK, ankyrin repeats. Ankyrin repeats are one of the most abundant repeat motifs, and generally function as scaffolds for protein-protein interactions in processes including cell cycle, transcriptional regulation, signal transduction, vesicular trafficking, and inflammatory response. Although predominantly found in eukaryotic proteins, they are also found in some bacterial and viral prot…	-	-	KOG0509, KOG0509, KOG0509, Ankyrin repeat and DHHC-type Zn-finger domain containing proteins [General function prediction only]. 9.19e-08	sp|G0S2X1|NUP37_CHATD Nucleoporin NUP37 OS=Chaetomium thermophilum (strain DSM 1495 / CBS 144.50 / IMI 039719) GN=NUP37 PE=3 SV=2 0.0	-	CAB0042738.1 unnamed protein product [Trichogramma brassicae] 2.90e-11	-
TRINITY_DN10634_c0_g1	25.5995	3.14066	3.02698	7.37802e-14	2.1109e-12	up	cd05330, cyclohexanol_reductase_SDR_c, cyclohexanol reductases, including levodione reductase, classical (c) SDRs. Cyloclohexanol reductases,including (6R)-2,2,6-trimethyl-1,4-cyclohexanedione (levodione) reductase of Corynebacterium aquaticum, catalyze the reversible oxidoreduction of hydroxycyclohexanone derivatives. SDRs are a functionally diverse family of oxidoreductases that have a single d…	pfam00106, adh_short, short chain dehydrogenase. This family contains a wide variety of dehydrogenases. 3.45e-11	-	KOG1200, KOG1200, KOG1200, Mitochondrial/plastidial beta-ketoacyl-ACP reductase [Lipid transport and metabolism]. 6.22e-11	sp|Q4WZ66|EASD_ASPFU Chanoclavine-I dehydrogenase easD OS=Neosartorya fumigata (strain ATCC MYA-4609 / Af293 / CBS 101355 / FGSC A1100) GN=easD PE=1 SV=1 9.64e-16	-	MCL4125454.1 hypothetical protein [Idotea baltica] 1.28e-12	-
TRINITY_DN14035_c2_g1	46.4632	328.442	-2.82148	9.7586e-15	3.03057e-13	down	cd13880, CuRO_2_MaLCC_like, The second cupredoxin domain of the fungal laccases similar to Ma-LCC from Melanocarpus albomyces. The subfamily of fungal laccases includes Ma-LCC and similar proteins. Ma-LCC is a multicopper oxidase (MCO) from Melanocarpus albomyces. Its crystal structure contains all four coppers at the mono- and trinuclear copper centers. Laccase is a blue multi-copper enzyme that…	pfam00394, Cu-oxidase, Multicopper oxidase. Many of the proteins in this family contain multiple similar copies of this plastocyanin-like domain. 3.70e-28	-	KOG1263, KOG1263, KOG1263, Multicopper oxidases [Secondary metabolites biosynthesis, transport and catabolism]. 2.25e-12	sp|Q96WM9|LAC2_BOTFU Laccase-2 OS=Botryotinia fuckeliana GN=lcc2 PE=2 SV=1 2.01e-39	-	CAF1050223.1 unnamed protein product [Didymodactylos carnosus] >CAF1464025.1 unnamed protein product [Didymodactylos carnosus] >CAF3817046.1 unnamed protein product [Didymodactylos carnosus] >CAF4333570.1 unnamed protein product [Didymodactylos carnosus] 4.37e-42	-
TRINITY_DN4617_c0_g1	2.53476	0.466424	2.44214	4.87032e-05	0.000383887	up	-	-	-	-	-	-	-	-
TRINITY_DN12915_c0_g2	627.872	270.235	1.21626	2.35119e-05	0.000202151	up	-	-	K01199-ko00500 Starch and sucrose metabolism	-	sp|A2QH21|EGLC_ASPNC Probable glucan endo-1,3-beta-glucosidase eglC OS=Aspergillus niger (strain CBS 513.88 / FGSC A1513) GN=eglC PE=3 SV=2 7.64e-81	-	MCL4151778.1 hypothetical protein [Idotea baltica] 1.89e-06	-
TRINITY_DN13749_c0_g1	100.869	209.287	-1.05299	0.00993151	0.039141	down	cd19180, SET_SpSET10-like, SET domain found in Schizosaccharomyces pombe SET domain-containing protein 10 (SETD10) and similar proteins. Schizosaccharomyces pombe SETD10 is a ribosomal S-adenosyl-L-methionine-dependent protein-lysine N-methyltransferase that methylates ribosomal protein L23 (rpl23a and rpl23b). 2.22e-15	-	-	KOG1337, KOG1337, KOG1337, N-methyltransferase [General function prediction only]. 6.33e-07	sp|O74738|SET10_SCHPO Ribosomal lysine N-methyltransferase set10 OS=Schizosaccharomyces pombe (strain 972 / ATCC 24843) GN=set10 PE=3 SV=1 5.91e-17	GO:0003674, molecular_function;GO:0003824, catalytic activity;GO:0005575, cellular_component;GO:0005622, intracellular;GO:0005623, cell;GO:0005634, nucleus;GO:0005730, nucleolus;GO:0005737, cytoplasm;GO:0006464, cellular protein modification process;GO:0006479, protein methylation;GO:0006807, nitrogen compound metabolic process;GO:0008150, biological_process;GO:0008152, metabolic process;GO:00081…	XP_009019171.1 hypothetical protein HELRODRAFT_184732 [Helobdella robusta] >ESO02731.1 hypothetical protein HELRODRAFT_184732 [Helobdella robusta] 2.40e-10	-
TRINITY_DN8434_c0_g1	2.5197	0.213119	3.56352	0.000180665	0.00125163	up	cd18821, GH43_Pc3Gal43A-like, Glycosyl hydrolase family 43 protein such as Phanerochaete chrysosporium exo-beta-1,3-galactanase (Pc1, 3Gal43A, 1,3Gal43A). This glycosyl hydrolase family 43 (GH43) subgroup includes characterized enzymes with exo-beta-1,3-galactanase (EC 3.2.1.145, also known as galactan 1,3-beta-galactosidase) activity such as Phanerochaete chrysosporium 1,3Gal43A (Pc1, 3Gal43A), …	-	-	-	-	-	ODM93820.1 hypothetical protein Ocin01_12863 [Orchesella cincta] 3.28e-42	-
TRINITY_DN13643_c0_g2	15.1542	35.3079	-1.22028	0.00783329	0.0322222	down	-	-	-	-	-	-	-	-
TRINITY_DN13643_c0_g3	0.928881	5.18925	-2.48196	0.000883103	0.00506185	down	-	-	-	-	-	-	-	-
TRINITY_DN8993_c0_g1	2.08642	0.418926	2.31626	0.00593938	0.0257137	up	-	-	-	-	sp|Q8DR77|UCDH_STRR6 Unsaturated chondroitin disaccharide hydrolase OS=Streptococcus pneumoniae (strain ATCC BAA-255 / R6) GN=ugl PE=1 SV=1 9.43e-25	-	CAF1277624.1 unnamed protein product, partial [Didymodactylos carnosus] >CAF4070605.1 unnamed protein product, partial [Didymodactylos carnosus] 2.11e-40	-
TRINITY_DN8856_c0_g1	2.45332	7.17517	-1.54828	0.003432	0.0161817	down	-	-	-	-	-	-	-	-
TRINITY_DN3919_c0_g1	1.78573	0.229156	2.96211	0.000502751	0.00308417	up	-	pfam03721, UDPG_MGDP_dh_N, UDP-glucose/GDP-mannose dehydrogenase family, NAD binding domain. The UDP-glucose/GDP-mannose dehydrogenaseses are a small group of enzymes which possesses the ability to catalyze the NAD-dependent 2-fold oxidation of an alcohol to an acid without the release of an aldehyde intermediate. 1.51e-25	K00012-ko00500 Starch and sucrose metabolism;ko00520 Amino sugar and nucleotide sugar metabolism;ko00040 Pentose and glucuronate interconversions;ko00053 Ascorbate and aldarate metabolism	KOG2666, KOG2666, KOG2666, UDP-glucose/GDP-mannose dehydrogenase [Carbohydrate transport and metabolism, Signal transduction mechanisms]. 1.98e-145	sp|P12378|UGDH_BOVIN UDP-glucose 6-dehydrogenase OS=Bos taurus GN=UGDH PE=1 SV=2 1.00e-145	-	CAD7643403.1 unnamed protein product [Oppiella nova] >CAG2164562.1 unnamed protein product [Oppiella nova] 4.19e-141	-
TRINITY_DN13827_c0_g2	192.135	90.8559	1.08047	0.000627631	0.00375601	up	-	-	-	-	-	-	-	-
TRINITY_DN7772_c0_g1	15.9753	2.78406	2.52058	3.6231e-09	5.86279e-08	up	cd21175, LPMO_AA9, lytic polysaccharide monooxygenase (LPMO) auxiliary activity family 9 (AA9). AA9 proteins are copper-dependent lytic polysaccharide monooxygenases (LPMOs) involved in the cleavage of cellulose chains with oxidation of carbons C1 and/or C4 and C6. Activities include lytic cellulose monooxygenase (C1-hydroxylating) (EC 1.14.99.54) and lytic cellulose monooxygenase (C4-dehydrogena…	pfam03443, Glyco_hydro_61, Glycosyl hydrolase family 61. Although weak endoglucanase activity has been demonstrated in several members of this family, they lack the clustered conserved catalytic acidic amino acids present in most glycoside hydrolases. Many members of this family lack measurable cellulase activity on their own, but enhance the activity of other cellulolytic enzymes. They are there…	K19356-ko00500 Starch and sucrose metabolism	-	sp|Q0CEU4|EGLD_ASPTN Probable endo-beta-1,4-glucanase D OS=Aspergillus terreus (strain NIH 2624 / FGSC A1156) GN=eglD PE=3 SV=1 2.29e-71	-	CAF1413793.1 unnamed protein product [Adineta steineri] 1.34e-20	-
TRINITY_DN12737_c0_g1	83.4491	221.977	-1.41144	0.000924725	0.00526451	down	cd07521, HAD_FCP1-like, human CTD phosphatase subunit 1 (CTDP1/FCP1) and related proteins; belongs to the haloacid dehalogenase-like superfamily. Human CTDP1/FCP1 is a protein phosphatase which dephosphorylates the phosphorylated C terminus (CTD) of RNA polymerase II. CTD phosphorylation is a key mechanism of regulation of gene expression in eukaryotes. CTDP1/FCP1 may have other roles in in trans…	pfam03031, NIF, NLI interacting factor-like phosphatase. This family contains a number of NLI interacting factor isoforms and also an N-terminal regions of RNA polymerase II CTC phosphatase and FCP1 serine phosphatase. This region has been identified as the minimal phosphatase domain. 4.79e-37	-	KOG1605, KOG1605, KOG1605, TFIIF-interacting CTD phosphatase, including NLI-interacting factor (involved in RNA polymerase II regulation) [Transcription]. 2.26e-44	sp|O59718|NEM1_SCHPO Nuclear envelope morphology protein 1 OS=Schizosaccharomyces pombe (strain 972 / ATCC 24843) GN=nem1 PE=3 SV=1 2.87e-55	GO:0000003, reproduction;GO:0003006, developmental process involved in reproduction;GO:0003674, molecular_function;GO:0003824, catalytic activity;GO:0004721, phosphoprotein phosphatase activity;GO:0005575, cellular_component;GO:0005622, intracellular;GO:0005623, cell;GO:0005737, cytoplasm;GO:0005739, mitochondrion;GO:0005811, lipid droplet;GO:0006464, cellular protein modification process;GO:0006…	XP_039301472.1 LOW QUALITY PROTEIN: CTD nuclear envelope phosphatase 1-like [Nilaparvata lugens] 9.42e-122	-
TRINITY_DN12084_c0_g1	157.142	348.093	-1.1474	0.00477456	0.0214584	down	cd11040, CYP7_CYP8-like, cytochrome P450s similar to cytochrome P450 family 7, subfamily A, polypeptide 1, cytochrome P450 family 7, subfamily B, polypeptide 1, cytochrome P450 family 8, subfamily A, polypeptide 1. This family is composed of cytochrome P450s (CYPs) with similarity to the human P450s CYP7A1, CYP7B1, CYP8B1, CYP39A1 and prostacyclin synthase (CYP8A1). CYP7A1, CYP7B1, CYP8B1, and CY…	-	-	-	-	-	XP_040849139.1 cytochrome P450 7B1 [Ochotona curzoniae] 1.08e-06	-
TRINITY_DN12641_c0_g1	23.952	11.3016	1.08362	0.000506457	0.0031024	up	cd06121, cupin_YML079wp, Saccharomyces cerevisiae YML079wp and related proteins, cupin domain. This family includes eukaryotic, bacterial, and archaeal proteins homologous to YML079wp, a Saccharomyces cerevisiae cupin-like protein of unknown function that structurally resembles plant seed storage and ligand-binding proteins (canavalin, glycinin, auxin binding protein) as well as the bacterial Rml…	pfam06172, Cupin_5, Cupin superfamily (DUF985). Family of uncharacterized proteins found in bacteria and eukaryotes that belongs to the Cupin superfamily. 3.09e-24	-	-	-	-	XP_022091668.1 uncharacterized protein LOC110979852 [Acanthaster planci] 2.24e-23	-
TRINITY_DN10318_c0_g1	436.125	2577.24	-2.56301	2.09152e-05	0.000181801	down	-	-	-	-	-	-	-	-
TRINITY_DN9591_c0_g1	0.407203	4.63013	-3.50723	0.000321357	0.00209364	down	cd05352, MDH-like_SDR_c, mannitol dehydrogenase (MDH)-like, classical (c) SDRs. NADP-mannitol dehydrogenase catalyzes the conversion of fructose to mannitol, an acyclic 6-carbon sugar. MDH is a tetrameric member of the SDR family. This subgroup also includes various other tetrameric SDRs, including Pichia stipitis D-arabinitol dehydrogenase (aka polyol dehydrogenase), Candida albicans Sou1p, a so…	pfam00106, adh_short, short chain dehydrogenase. This family contains a wide variety of dehydrogenases. 1.67e-18	-	KOG1200, KOG1200, KOG1200, Mitochondrial/plastidial beta-ketoacyl-ACP reductase [Lipid transport and metabolism]. 1.36e-19	sp|Q99LB2|DHRS4_MOUSE Dehydrogenase/reductase SDR family member 4 OS=Mus musculus GN=Dhrs4 PE=1 SV=3 4.14e-22	-	KAJ3014027.1 hypothetical protein HDU68_000456 [Siphonaria sp. JEL0065] 3.60e-26	-
TRINITY_DN11400_c0_g1	22.6618	5.3275	2.08873	3.23559e-06	3.35977e-05	up	-	-	-	-	sp|Q5BEJ5|AFOF_EMENI FAD-linked oxidoreductase afoF OS=Emericella nidulans (strain FGSC A4 / ATCC 38163 / CBS 112.46 / NRRL 194 / M139) GN=afoF PE=1 SV=1 2.15e-16	-	CAF4004686.1 unnamed protein product [Adineta steineri] 1.57e-22	-
TRINITY_DN1103_c0_g1	4.37973	13.2491	-1.59698	0.000892176	0.0051008	down	-	pfam00150, Cellulase, Cellulase (glycosyl hydrolase family 5). 2.09e-09	-	-	sp|A3DJ77|GUNC_CLOTH Endoglucanase C OS=Clostridium thermocellum (strain ATCC 27405 / DSM 1237 / NBRC 103400 / NCIMB 10682 / NRRL B-4536 / VPI 7372) GN=celC PE=3 SV=1 5.49e-22	-	EFX85489.1 exoglucanase-1,3-beta-glucanase [Daphnia pulex] 1.98e-17	-
TRINITY_DN8309_c0_g1	0.467808	224.741	-8.90813	1.05471e-45	2.83654e-43	down	-	-	-	-	-	-	-	-
TRINITY_DN11679_c0_g1	11.5747	1.89009	2.61444	6.04911e-11	1.24187e-09	up	-	-	-	-	sp|D4AS41|A7056_ARTBC Uncharacterized FAD-linked oxidoreductase ARB_02478 OS=Arthroderma benhamiae (strain ATCC MYA-4681 / CBS 112371) GN=ARB_07056 PE=1 SV=2 1.40e-06	-	CAF1052714.1 unnamed protein product [Didymodactylos carnosus] >CAF1204979.1 unnamed protein product [Didymodactylos carnosus] >CAF3819371.1 unnamed protein product [Didymodactylos carnosus] >CAF3969335.1 unnamed protein product [Didymodactylos carnosus] 3.79e-65	-
TRINITY_DN13317_c0_g1	2.1086	5.02217	-1.25203	0.0064055	0.027301	down	cd17327, MFS_FEN2_like, Pantothenate transporter FEN2 and similar transporters of the Major Facilitator Superfamily. This family is composed of Saccharomyces cerevisiae pantothenate transporter FEN2 (or fenpropimorph resistance protein 2) and similar proteins from fungi and bacteria including fungal vitamin H transporter, allantoate permease, and high-affinity nicotinic acid transporter, as well …	pfam01425, Amidase, Amidase. 7.73e-28	-	KOG1212, KOG1212, KOG1212, Amidases [Translation, ribosomal structure and biogenesis, Lipid transport and metabolism, Signal transduction mechanisms]. 4.12e-43	sp|P08158|AMDS_EMENI Acetamidase OS=Emericella nidulans (strain FGSC A4 / ATCC 38163 / CBS 112.46 / NRRL 194 / M139) GN=amdS PE=2 SV=1 3.17e-115	-	CAF3711633.1 unnamed protein product [Rotaria sp. Silwood1] 1.08e-99	-
TRINITY_DN11171_c0_g1	1.65102	4.64946	-1.4937	0.00671805	0.028319	down	cd12148, fungal_TF_MHR, fungal transcription factor regulatory middle homology region. This domain is present in the large family of fungal zinc cluster transcription factors that contain an N-terminal GAL4-like C6 zinc binuclear cluster DNA-binding domain. Examples of members of this large fungal group are the following Saccharomyces cerevisiae transcription factors, GAL4, STB5, DAL81, CAT8, RDR…	-	-	-	sp|P04386|GAL4_YEAST Regulatory protein GAL4 OS=Saccharomyces cerevisiae (strain ATCC 204508 / S288c) GN=GAL4 PE=1 SV=2 4.88e-44	-	AWC67558.1 GAL4 [Drosophila melanogaster] 9.98e-37	-
TRINITY_DN12215_c0_g2	13.1211	3.39407	1.9508	1.41634e-07	1.83483e-06	up	-	pfam00172, Zn_clus, Fungal Zn(2)-Cys(6) binuclear cluster domain. 1.14e-06	-	-	sp|G4MZJ4|XLNR_MAGO7 Xylanolytic transcriptional activator xlnR homolog OS=Magnaporthe oryzae (strain 70-15 / ATCC MYA-4617 / FGSC 8958) GN=xlr1 PE=3 SV=1 0.0	GO:0000272, polysaccharide catabolic process;GO:0001067, regulatory region nucleic acid binding;GO:0003674, molecular_function;GO:0003676, nucleic acid binding;GO:0003677, DNA binding;GO:0003700, DNA binding transcription factor activity;GO:0005488, binding;GO:0005575, cellular_component;GO:0005622, intracellular;GO:0005623, cell;GO:0005634, nucleus;GO:0005975, carbohydrate metabolic process;GO:0…	KAJ3019912.1 hypothetical protein HDU68_010434 [Siphonaria sp. JEL0065] 1.16e-06	-
TRINITY_DN12536_c0_g1	0.517505	10.6727	-4.36621	4.19732e-17	1.60851e-15	down	cd05120, APH_ChoK_like, Aminoglycoside 3'-phosphotransferase and Choline Kinase family. This family is composed of APH, ChoK, ethanolamine kinase (ETNK), macrolide 2'-phosphotransferase (MPH2'), an unusual homoserine kinase, and uncharacterized proteins with similarity to the N-terminal domain of acyl-CoA dehydrogenase 10 (ACAD10). The members of this family catalyze the transfer of the gamma-pho…	-	-	-	-	-	XP_035708689.1 uncharacterized protein LOC110850868 isoform X2 [Folsomia candida] 1.31e-10	-
TRINITY_DN25554_c0_g1	0.403605	2.88831	-2.83921	4.93954e-05	0.000388433	down	cd05235, SDR_e1, extended (e) SDRs, subgroup 1. This family consists of an SDR module of multidomain proteins identified as putative polyketide sythases fatty acid synthases (FAS), and nonribosomal peptide synthases, among others. However, unlike the usual ketoreductase modules of FAS and polyketide synthase, these domains are related to the extended SDRs, and have canonical NAD(P)-binding motifs…	pfam07993, NAD_binding_4, Male sterility protein. This family represents the C-terminal region of the male sterility protein in a number of arabidopsis and drosophila. A sequence-related jojoba acyl CoA reductase is also included. 1.98e-14	-	KOG1221, KOG1221, KOG1221, Acyl-CoA reductase [Lipid transport and metabolism]. 1.23e-11	sp|Q70LM4|LGRD_BREPA Linear gramicidin synthase subunit D OS=Brevibacillus parabrevis GN=lgrD PE=1 SV=1 4.44e-26	-	CAF1084633.1 unnamed protein product [Adineta ricciae] >CAF1215304.1 unnamed protein product [Adineta ricciae] 2.51e-97	-
TRINITY_DN12550_c0_g1	10.7898	3.61647	1.57701	0.000393147	0.00249253	up	cd00312, Esterase_lipase, Esterases and lipases (includes fungal lipases, cholinesterases, etc.) These enzymes act on carboxylic esters (EC: 3.1.1.-). The catalytic apparatus involves three residues (catalytic triad): a serine, a glutamate or aspartate and a histidine.These catalytic residues are responsible for the nucleophilic attack on the carbonyl carbon atom of the ester bond. In contrast wi…	pfam00135, COesterase, Carboxylesterase family. 1.25e-32	-	KOG4389, KOG4389, KOG4389, Acetylcholinesterase/Butyrylcholinesterase [Signal transduction mechanisms]. 4.40e-51	sp|P06276|CHLE_HUMAN Cholinesterase OS=Homo sapiens GN=BCHE PE=1 SV=1 3.06e-37	-	CAF2595072.1 unnamed protein product [Rotaria sp. Silwood2] >CAF2857658.1 unnamed protein product [Rotaria sp. Silwood2] >CAF4122515.1 unnamed protein product [Rotaria sp. Silwood2] >CAF4254213.1 unnamed protein product [Rotaria sp. Silwood2] 6.63e-55	-
TRINITY_DN9136_c0_g1	1.17365	4.5183	-1.94477	0.00891408	0.0357921	down	cd08249, enoyl_reductase_like, enoyl_reductase_like. Member identified as possible enoyl reductase of the MDR family. 2-enoyl thioester reductase (ETR) catalyzes the NADPH-dependent dependent conversion of trans-2-enoyl acyl carrier protein/coenzyme A (ACP/CoA) to acyl-(ACP/CoA) in fatty acid synthesis. 2-enoyl thioester reductase activity has been linked in Candida tropicalis as essential in mai…	-	-	-	sp|P54006|TOXD_COCCA Protein TOXD OS=Cochliobolus carbonum GN=TOXD PE=3 SV=1 6.83e-11	-	KAJ3030869.1 hypothetical protein HDU68_007512 [Siphonaria sp. JEL0065] 2.76e-13	-
TRINITY_DN13167_c0_g1	139.128	60.1088	1.21076	0.000149772	0.00105334	up	cd01866, Rab2, Rab GTPase family 2 (Rab2). Rab2 is localized on cis-Golgi membranes and interacts with Golgi matrix proteins. Rab2 is also implicated in the maturation of vesicular tubular clusters (VTCs), which are microtubule-associated intermediates in transport between the ER and Golgi apparatus. In plants, Rab2 regulates vesicle trafficking between the ER and the Golgi bodies and is importan…	pfam16192, PMT_4TMC, C-terminal four TMM region of protein-O-mannosyltransferase. PMT_4TMC is the C-terminal four membrane-pass region of protein-O-mannosyltransferases and similar enzymes. 3.43e-43	K00728-ko00514 Other types of O-glycan biosynthesis	KOG3359, KOG3359, KOG3359, Dolichyl-phosphate-mannose:protein O-mannosyl transferase [Posttranslational modification, protein turnover, chaperones]. 7.07e-170	sp|Q5ADM9|PMT2_CANAL Dolichyl-phosphate-mannose--protein mannosyltransferase 2 OS=Candida albicans (strain SC5314 / ATCC MYA-2876) GN=PMT2 PE=1 SV=1 0.0	GO:0000030, mannosyltransferase activity;GO:0003674, molecular_function;GO:0003824, catalytic activity;GO:0004169, dolichyl-phosphate-mannose-protein mannosyltransferase activity;GO:0005575, cellular_component;GO:0005622, intracellular;GO:0005623, cell;GO:0005737, cytoplasm;GO:0005783, endoplasmic reticulum;GO:0005789, endoplasmic reticulum membrane;GO:0005886, plasma membrane;GO:0006464, cellula…	KAJ3017975.1 Protein O-mannosyltransferase 2 [Siphonaria sp. JEL0065] 1.25e-181	-
TRINITY_DN12155_c0_g2	0.591489	6.33688	-3.42135	2.25201e-06	2.38447e-05	down	-	-	-	-	-	-	-	-
TRINITY_DN12155_c0_g1	34.6868	14.8047	1.22833	0.0051331	0.0227955	up	-	-	-	-	-	-	KAJ3013004.1 hypothetical protein HDU68_000920, partial [Siphonaria sp. JEL0065] 1.57e-06	-
TRINITY_DN23305_c0_g1	1.29207	0.0001	13.6574	0.0076109	0.0315485	up	-	-	-	-	sp|Q53GA4|PHLA2_HUMAN Pleckstrin homology-like domain family A member 2 OS=Homo sapiens GN=PHLDA2 PE=1 SV=2 5.29e-79	GO:0000003, reproduction;GO:0001890, placenta development;GO:0003006, developmental process involved in reproduction;GO:0005575, cellular_component;GO:0005622, intracellular;GO:0005623, cell;GO:0005737, cytoplasm;GO:0006109, regulation of carbohydrate metabolic process;GO:0007275, multicellular organism development;GO:0008150, biological_process;GO:0009653, anatomical structure morphogenesis;GO:0…	XP_017803638.2 pleckstrin homology-like domain family A member 2 isoform X1 [Papio anubis] 8.20e-86	Homo sapiens pleckstrin homology like domain family A member 2 (PHLDA2), mRNA 0.0
TRINITY_DN8676_c0_g2	0.170173	2.45828	-3.85257	0.00698257	0.029278	down	cd02933, OYE_like_FMN, Old yellow enzyme (OYE)-like FMN binding domain. OYE was the first flavin-dependent enzyme identified, however its true physiological role remains elusive to this day. Each monomer of OYE contains FMN as a non-covalently bound cofactor, uses NADPH as a reducing agent with oxygens, quinones, and alpha,beta-unsaturated aldehydes and ketones, and can act as electron acceptors …	pfam00724, Oxidored_FMN, NADH:flavin oxidoreductase / NADH oxidase family. 2.49e-64	-	KOG0134, KOG0134, KOG0134, NADH:flavin oxidoreductase/12-oxophytodienoate reductase [Energy production and conversion, General function prediction only]. 7.78e-39	sp|Q4WZ70|EASA_ASPFU Chanoclavine-I aldehyde reductase easA OS=Neosartorya fumigata (strain ATCC MYA-4609 / Af293 / CBS 101355 / FGSC A1100) GN=easA PE=1 SV=1 1.11e-75	GO:0008150, biological_process;GO:0009636, response to toxic substance;GO:0009987, cellular process;GO:0042221, response to chemical;GO:0050896, response to stimulus;GO:0051716, cellular response to stimulus;GO:0070887, cellular response to chemical stimulus;GO:0097237, cellular response to toxic substance;GO:0098754, detoxification;GO:1990748, cellular detoxification	OQV25686.1 12-oxophytodienoate reductase 1 [Hypsibius exemplaris] 5.33e-58	-
TRINITY_DN12916_c0_g1	119.461	32.0562	1.89786	2.31576e-06	2.44427e-05	up	cd05352, MDH-like_SDR_c, mannitol dehydrogenase (MDH)-like, classical (c) SDRs. NADP-mannitol dehydrogenase catalyzes the conversion of fructose to mannitol, an acyclic 6-carbon sugar. MDH is a tetrameric member of the SDR family. This subgroup also includes various other tetrameric SDRs, including Pichia stipitis D-arabinitol dehydrogenase (aka polyol dehydrogenase), Candida albicans Sou1p, a so…	pfam13561, adh_short_C2, Enoyl-(Acyl carrier protein) reductase. 2.63e-21	-	KOG0725, KOG0725, KOG0725, Reductases with broad range of substrate specificities [General function prediction only]. 5.03e-22	sp|P50166|ARDH_CANTR D-arabinitol 2-dehydrogenase [ribulose-forming] OS=Candida tropicalis GN=ARD PE=1 SV=1 2.82e-47	-	CAF1120601.1 unnamed protein product [Rotaria sp. Silwood1] >CAF1473353.1 unnamed protein product [Rotaria sp. Silwood1] >CAF3676858.1 unnamed protein product [Rotaria sp. Silwood1] >CAF3677575.1 unnamed protein product [Rotaria sp. Silwood1] >CAF4846136.1 unnamed protein product [Rotaria sp. Silwood1] 2.81e-41	-
TRINITY_DN8784_c0_g1	6.47264	2.17412	1.57392	0.000123434	0.000888554	up	-	-	-	-	sp|D4AVW3|LYSM5_ARTBC LysM domain-containing protein ARB_00327 OS=Arthroderma benhamiae (strain ATCC MYA-4681 / CBS 112371) GN=ARB_00327 PE=3 SV=2 2.99e-15	-	CAF1112354.1 unnamed protein product [Brachionus calyciflorus] 1.38e-07	-
TRINITY_DN3753_c0_g1	3.82268	0.960116	1.9933	0.00662015	0.0280647	up	-	-	-	-	-	-	-	-
TRINITY_DN14070_c1_g1	263.365	654.034	-1.3123	0.00459256	0.0207863	down	-	-	-	-	-	-	-	-
TRINITY_DN12542_c0_g1	5.70184	2.17205	1.39237	0.000786383	0.00457969	up	-	-	-	KOG4177, KOG4177, KOG4177, Ankyrin [Cell wall/membrane/envelope biogenesis]. 1.45e-06	-	-	-	-
TRINITY_DN6633_c0_g1	59.1321	12.471	2.24536	2.1195e-09	3.54489e-08	up	-	pfam04724, Glyco_transf_17, Glycosyltransferase family 17. This family represents beta-1,4-mannosyl-glycoprotein beta-1,4-N-acetylglucosaminyltransferase (EC:2.4.1.144). This enzyme transfers the bisecting GlcNAc to the core mannose of complex N-glycans. The addition of this residue is regulated during development and has functional consequences for receptor signalling, cell adhesion, and tumor p…	K00737-ko00510 N-Glycan biosynthesis	-	-	-	CAF1128847.1 unnamed protein product [Adineta steineri] >CAF1442738.1 unnamed protein product [Adineta steineri] >CAF1443230.1 unnamed protein product [Adineta steineri] 4.50e-38	-
TRINITY_DN10816_c0_g1	0.0235729	36.6532	-10.6026	8.28206e-16	2.79821e-14	down	-	pfam10528, GLEYA, GLEYA domain. The GLEYA domain is related to lectin-like binding domains found in the S. cerevisiae Flo proteins and the C. glabrata Epa proteins. It is a carbohydrate-binding domain that is found in fungal adhesins (also referred to as agglutinins or flocculins). Adhesins with a GLEYA domain possess a typical N-terminal signal peptide and a domain of conserved sequence repeats,…	-	-	-	-	-	-
TRINITY_DN12844_c0_g1	1.15782	45.3703	-5.29227	3.14061e-27	2.74232e-25	down	-	-	-	-	-	-	-	-
TRINITY_DN4020_c0_g1	0.288956	1.73626	-2.58707	0.0102014	0.0399938	down	-	pfam07173, GRDP-like, Glycine-rich domain-containing protein-like. This entry includes Arabidopsis Glycine-rich domain- containing protein 1 and 2 (GRDP1/2). They are involved in development and stress responses. 1.82e-07	-	-	sp|Q9ZQ47|GRDP1_ARATH Glycine-rich domain-containing protein 1 OS=Arabidopsis thaliana GN=GRDP1 PE=2 SV=1 1.07e-07	-	KAJ3030315.1 hypothetical protein HDU68_009468 [Siphonaria sp. JEL0065] 1.05e-24	-
TRINITY_DN12988_c0_g1	135.105	62.8043	1.10515	0.00134342	0.00726668	up	cd07308, lectin_leg-like, legume-like lectins: ERGIC-53, ERGL, VIP36, VIPL, EMP46, and EMP47. The legume-like (leg-like) lectins are eukaryotic intracellular sugar transport proteins with a carbohydrate recognition domain similar to that of the legume lectins. This domain binds high-mannose-type oligosaccharides for transport from the endoplasmic reticulum to the Golgi complex. These leg-like lec…	pfam03388, Lectin_leg-like, Legume-like lectin family. Lectins are structurally diverse proteins that bind to specific carbohydrates. This family includes the VIP36 and ERGIC-53 lectins. These two proteins were the first recognized members of a family of animal lectins similar (19-24%) to the leguminous plant lectins. The alignment for this family aligns residues lying towards the N-terminus, whe…	K10082-ko04141 Protein processing in endoplasmic reticulum	KOG3839, KOG3839, KOG3839, Lectin VIP36, involved in the transport of glycoproteins carrying high mannose-type glycans [Intracellular trafficking, secretion, and vesicular transport]. 3.15e-45	sp|O94401|YQF8_SCHPO L-type lectin-like domain-containing protein C126.08c OS=Schizosaccharomyces pombe (strain 972 / ATCC 24843) GN=SPCC126.08c PE=3 SV=1 4.59e-49	GO:0006810, transport;GO:0006888, ER to Golgi vesicle-mediated transport;GO:0008150, biological_process;GO:0016192, vesicle-mediated transport;GO:0046907, intracellular transport;GO:0048193, Golgi vesicle transport;GO:0051179, localization;GO:0051234, establishment of localization;GO:0051641, cellular localization;GO:0051649, establishment of localization in cell	XP_050449337.1 vesicular integral-membrane protein VIP36 [Cataglyphis hispanica] 1.28e-48	-
TRINITY_DN8608_c0_g1	98.2065	20.023	2.29416	2.35242e-09	3.91982e-08	up	-	pfam02558, ApbA, Ketopantoate reductase PanE/ApbA. This is a family of 2-dehydropantoate 2-reductases also known as ketopantoate reductases, EC:1.1.1.169. The reaction catalyzed by this enzyme is: (R)-pantoate + NADP(+) <=> 2-dehydropantoate + NADPH. AbpA catalyzes the NADPH reduction of ketopantoic acid to pantoic acid in the alternative pyrimidine biosynthetic (APB) pathway. ApbA and PanE are a…	-	-	sp|Q07589|YD144_YEAST Uncharacterized protein YDL144C OS=Saccharomyces cerevisiae (strain ATCC 204508 / S288c) GN=YDL144C PE=1 SV=2 6.42e-34	GO:0005575, cellular_component;GO:0005622, intracellular;GO:0005623, cell;GO:0005634, nucleus;GO:0005737, cytoplasm;GO:0043226, organelle;GO:0043227, membrane-bounded organelle;GO:0043229, intracellular organelle;GO:0043231, intracellular membrane-bounded organelle;GO:0044424, intracellular part;GO:0044464, cell part	-	-
TRINITY_DN10610_c0_g1	28.16	82.5774	-1.5521	4.23747e-05	0.000339376	down	cd04608, CBS_pair_CBS, Two tandem repeats of the cystathionine beta-synthase (CBS pair) domains associated with the pyridoxal-phosphate (PALP) dependent enzyme domain. This cd contains two tandem repeats of the cystathionine beta-synthase (CBS pair) domains associated with the pyridoxal-phosphate (PALP) dependent enzyme domain upstream. Cystathionine beta-synthase (CBS ) contains, besides the C-t…	-	-	-	-	-	-	-
TRINITY_DN11489_c0_g1	72.9746	16.1865	2.1726	5.18685e-12	1.19023e-10	up	sd00045, ANK, ankyrin repeats. Ankyrin repeats are one of the most abundant repeat motifs, and generally function as scaffolds for protein-protein interactions in processes including cell cycle, transcriptional regulation, signal transduction, vesicular trafficking, and inflammatory response. Although predominantly found in eukaryotic proteins, they are also found in some bacterial and viral prot…	pfam12796, Ank_2, Ankyrin repeats (3 copies). 5.20e-12	-	KOG4177, KOG4177, KOG4177, Ankyrin [Cell wall/membrane/envelope biogenesis]. 2.27e-06	sp|Q4R544|ASB8_MACFA Ankyrin repeat and SOCS box protein 8 OS=Macaca fascicularis GN=ASB8 PE=2 SV=1 2.08e-10	-	KAI1694588.1 phosphorylase superfamily domain-containing protein [Ditylenchus destructor] 1.80e-34	-
TRINITY_DN11041_c0_g1	18.6057	199.683	-3.4239	8.30015e-10	1.47052e-08	down	-	-	-	-	-	-	CAF1362985.1 unnamed protein product [Adineta ricciae] >CAF1523239.1 unnamed protein product [Adineta ricciae] 1.47e-11	-
TRINITY_DN13379_c1_g7	66.4361	23.2032	1.51764	6.51491e-05	0.00049918	up	-	-	-	-	-	-	-	-
TRINITY_DN13379_c1_g5	94.5718	44.6711	1.08207	0.00118346	0.00652506	up	cd12619, RRM2_PUB1, RNA recognition motif 2 (RRM2) found in yeast nuclear and cytoplasmic polyadenylated RNA-binding protein PUB1 and similar proteins. This subgroup corresponds to the RRM2 of yeast protein PUB1, also termed ARS consensus-binding protein ACBP-60, or poly uridylate-binding protein, or poly(U)-binding protein. PUB1 has been identified as both, a heterogeneous nuclear RNA-binding pr…	pfam00076, RRM_1, RNA recognition motif. (a.k.a. RRM, RBD, or RNP domain). The RRM motif is probably diagnostic of an RNA binding protein. RRMs are found in a variety of RNA binding proteins, including various hnRNP proteins, proteins implicated in regulation of alternative splicing, and protein components of snRNPs. The motif also appears in a few single stranded DNA binding proteins. The RRM st…	-	KOG0148, KOG0148, KOG0148, Apoptosis-promoting RNA-binding protein TIA-1/TIAR (RRM superfamily) [RNA processing and modification, Translation, ribosomal structure and biogenesis]. 7.19e-18	sp|Q9LQI9|UBP1B_ARATH Oligouridylate-binding protein 1B OS=Arabidopsis thaliana GN=UBP1B PE=1 SV=1 1.19e-56	GO:0000184, nuclear-transcribed mRNA catabolic process, nonsense-mediated decay;GO:0000932, P-body;GO:0000956, nuclear-transcribed mRNA catabolic process;GO:0003674, molecular_function;GO:0003676, nucleic acid binding;GO:0003723, RNA binding;GO:0003727, single-stranded RNA binding;GO:0003729, mRNA binding;GO:0005488, binding;GO:0005575, cellular_component;GO:0005622, intracellular;GO:0005623, cel…	KAJ3013243.1 hypothetical protein HDU68_000810, partial [Siphonaria sp. JEL0065] 5.10e-76	-
TRINITY_DN13379_c1_g4	753.107	1854.08	-1.29978	0.0103043	0.0402921	down	-	pfam11034, Grg1, Glucose-repressible protein Grg1. This fungal protein increases during glucose deprivation. Its function is unknown. 8.79e-20	K02923-ko03010 Ribosome	KOG3499, KOG3499, KOG3499, 60S ribosomal protein L38 [Translation, ribosomal structure and biogenesis]. 9.76e-11	sp|Q9C2B9|RL38_NEUCR 60S ribosomal protein L38 OS=Neurospora crassa (strain ATCC 24698 / 74-OR23-1A / CBS 708.71 / DSM 1257 / FGSC 987) GN=rpl-38 PE=3 SV=1 3.60e-25	GO:0002181, cytoplasmic translation;GO:0003674, molecular_function;GO:0003676, nucleic acid binding;GO:0003723, RNA binding;GO:0003735, structural constituent of ribosome;GO:0005198, structural molecule activity;GO:0005488, binding;GO:0005575, cellular_component;GO:0005622, intracellular;GO:0005623, cell;GO:0005737, cytoplasm;GO:0005829, cytosol;GO:0005840, ribosome;GO:0006412, translation;GO:000…	KAF3428214.1 hypothetical protein E2986_11738 [Frieseomelitta varia] 1.47e-14	-
TRINITY_DN13379_c1_g2	71.5273	175.4	-1.29408	0.00254939	0.012585	down	cd01079, NAD_bind_m-THF_DH, NAD binding domain of methylene-tetrahydrofolate dehydrogenase. The NAD-binding domain of methylene-tetrahydrofolate dehydrogenase (m-THF DH). M-THF is a versatile carrier of activated one-carbon units. The major one-carbon folate donors are N-5 methyltetrahydrofolate, N5,N10-m-THF, and N10-formayltetrahydrofolate. The oxidation of metabolic intermediate m-THF to m-THF…	pfam06703, SPC25, Microsomal signal peptidase 25 kDa subunit (SPC25). This family consists of several microsomal signal peptidase 25 kDa subunit proteins. Translocation of polypeptide chains across the endoplasmic reticulum (ER) membrane is triggered by signal sequences. Subsequently, signal recognition particle interacts with its membrane receptor and the ribosome-bound nascent chain is targeted…	K00295-ko00670 One carbon pool by folate	KOG0089, KOG0089, KOG0089, Methylenetetrahydrofolate dehydrogenase/methylenetetrahydrofolate cyclohydrolase [Coenzyme transport and metabolism]. 1.32e-32	sp|Q9P786|MTD1_SCHPO Methylenetetrahydrofolate dehydrogenase [NAD(+)] OS=Schizosaccharomyces pombe (strain 972 / ATCC 24843) GN=mtd1 PE=3 SV=1 2.55e-122	GO:0003674, molecular_function;GO:0003824, catalytic activity;GO:0004487, methylenetetrahydrofolate dehydrogenase (NAD+) activity;GO:0005575, cellular_component;GO:0005622, intracellular;GO:0005623, cell;GO:0005737, cytoplasm;GO:0005829, cytosol;GO:0006082, organic acid metabolic process;GO:0006139, nucleobase-containing compound metabolic process;GO:0006144, purine nucleobase metabolic process;G…	KAJ3028958.1 hypothetical protein HDU68_000485 [Siphonaria sp. JEL0065] 2.01e-106	-
TRINITY_DN13379_c1_g9	3.82138	0.551342	2.79307	0.000145808	0.00102968	up	-	pfam06985, HET, Heterokaryon incompatibility protein (HET). This family represents a conserved region approximately 150 residues long within various heterokaryon incompatibility proteins that seem to be restricted to ascomycete fungi. Genetic differences in specific het genes prevent a viable heterokaryotic fungal cell from being formed by the fusion of filaments from two different wild-type stra…	-	-	sp|Q9UV10|HET6_NEUCR Heterokaryon incompatibility protein 6, OR allele OS=Neurospora crassa (strain ATCC 24698 / 74-OR23-1A / CBS 708.71 / DSM 1257 / FGSC 987) GN=het-6 PE=4 SV=1 8.49e-30	-	KAI1691421.1 heterokaryon incompatibility protein (HET) domain-containing protein [Ditylenchus destructor] 1.02e-192	-
TRINITY_DN12673_c1_g2	2048.12	428.327	2.25752	2.56247e-09	4.23311e-08	up	cd06186, NOX_Duox_like_FAD_NADP, NADPH oxidase (NOX) catalyzes the generation of reactive oxygen species (ROS) such as superoxide and hydrogen peroxide. ROS were originally identified as bactericidal agents in phagocytes, but are now also implicated in cell signaling and metabolism. NOX has a 6-alpha helix heme-binding transmembrane domain fused to a flavoprotein with the nucleotide binding domai…	pfam01794, Ferric_reduct, Ferric reductase like transmembrane component. This family includes a common region in the transmembrane proteins mammalian cytochrome B-245 heavy chain (gp91-phox), ferric reductase transmembrane component in yeast and respiratory burst oxidase from mouse-ear cress. This may be a family of flavocytochromes capable of moving electrons across the plasma membrane. The Frp1…	-	KOG0039, KOG0039, KOG0039, Ferric reductase, NADH/NADPH oxidase and related proteins [Inorganic ion transport and metabolism, Secondary metabolites biosynthesis, transport and catabolism]. 1.43e-06	sp|P32791|FRE1_YEAST Ferric/cupric reductase transmembrane component 1 OS=Saccharomyces cerevisiae (strain ATCC 204508 / S288c) GN=FRE1 PE=1 SV=1 2.86e-20	-	-	-
TRINITY_DN10732_c0_g1	22.9066	8.72496	1.39254	0.000466406	0.00288755	up	-	pfam03169, OPT, OPT oligopeptide transporter protein. The OPT family of oligopeptide transporters is distinct from the ABC pfam00005 and PTR pfam00854 transporter families. OPT transporters were first recognized in fungi (Candida albicans and Schizosaccharomyces pombe), but this alignment also includes orthologues from Arabidopsis thaliana. OPT transporters are thought to have 12-14 transmembrane…	-	KOG2262, KOG2262, KOG2262, Sexual differentiation process protein ISP4 [Signal transduction mechanisms]. 3.13e-170	sp|P40900|ISP4_SCHPO Sexual differentiation process protein isp4 OS=Schizosaccharomyces pombe (strain 972 / ATCC 24843) GN=isp4 PE=2 SV=2 0.0	GO:0003674, molecular_function;GO:0005215, transporter activity;GO:0005575, cellular_component;GO:0005622, intracellular;GO:0005623, cell;GO:0005737, cytoplasm;GO:0005794, Golgi apparatus;GO:0005886, plasma membrane;GO:0005887, integral component of plasma membrane;GO:0006810, transport;GO:0006857, oligopeptide transport;GO:0008150, biological_process;GO:0012505, endomembrane system;GO:0015833, p…	CAF0826649.1 unnamed protein product [Rotaria sordida] >CAF1346379.1 unnamed protein product [Rotaria sordida] >CAF3512671.1 unnamed protein product [Rotaria sordida] >CAF3819441.1 unnamed protein product [Rotaria sordida] 4.55e-96	-
TRINITY_DN9574_c0_g1	1.25378	25.0107	-4.31819	2.81361e-21	1.53177e-19	down	cd11051, CYP59-like, cytochrome P450 family 59 and similar cytochrome P450s. This family is composed of Aspergillus nidulans cytochrome P450 59 (CYP59), also called sterigmatocystin biosynthesis P450 monooxygenase stcS, and similar fungal proteins. CYP59 is required for the conversion of versicolorin A to sterigmatocystin. This family belongs to the large cytochrome P450 (P450, CYP) superfamily o…	pfam00067, p450, Cytochrome P450. Cytochrome P450s are haem-thiolate proteins involved in the oxidative degradation of various compounds. They are particularly well known for their role in the degradation of environmental toxins and mutagens. They can be divided into 4 classes, according to the method by which electrons from NAD(P)H are delivered to the catalytic site. Sequence conservation is re…	-	KOG0158, KOG0158, KOG0158, Cytochrome P450 CYP3/CYP5/CYP6/CYP9 subfamilies [Secondary metabolites biosynthesis, transport and catabolism]. 1.95e-28	sp|Q00714|STCS_EMENI Probable sterigmatocystin biosynthesis P450 monooxygenase stcS OS=Emericella nidulans (strain FGSC A4 / ATCC 38163 / CBS 112.46 / NRRL 194 / M139) GN=stcS PE=1 SV=2 2.45e-80	-	XP_044297191.1 cytochrome P450 4A4-like isoform X2 [Varanus komodoensis] 1.85e-25	-
TRINITY_DN14031_c0_g1	27.2886	79.2387	-1.53791	0.000353898	0.00227262	down	cd05333, BKR_SDR_c, beta-Keto acyl carrier protein reductase (BKR), involved in Type II FAS, classical (c) SDRs. This subgroup includes the Escherichai coli K12 BKR, FabG. BKR catalyzes the NADPH-dependent reduction of ACP in the first reductive step of de novo fatty acid synthesis (FAS). FAS consists of four elongation steps, which are repeated to extend the fatty acid chain through the addition…	pfam00106, adh_short, short chain dehydrogenase. This family contains a wide variety of dehydrogenases. 1.20e-15	-	KOG0725, KOG0725, KOG0725, Reductases with broad range of substrate specificities [General function prediction only]. 3.49e-21	sp|A0A097ZPE6|ANDL_EMEVA Anditomin synthesis protein L OS=Emericella variicolor GN=andL PE=3 SV=1 2.34e-26	-	KAJ3014027.1 hypothetical protein HDU68_000456 [Siphonaria sp. JEL0065] 5.70e-29	-
TRINITY_DN14854_c0_g1	0.0001	7.66604	-16.2262	3.15849e-08	4.50872e-07	down	-	pfam05163, DinB, DinB family. DNA damage-inducible (din) genes in Bacillus subtilis are coordinately regulated and together compose a global regulatory network that has been termed the SOS-like or SOB regulon. This family includes DinB from B. subtilis. 1.15e-09	-	-	sp|O07939|YIST_BACSU Uncharacterized protein YisT OS=Bacillus subtilis (strain 168) GN=yisT PE=3 SV=1 1.05e-08	-	KAI5930740.1 hypothetical protein MM560_G965n3 [Manis javanica] 3.19e-17	-
TRINITY_DN14222_c0_g4	6.07517	17.6366	-1.53757	0.00157822	0.00835745	down	-	-	-	-	-	-	-	-
TRINITY_DN832_c0_g1	7.83792	0.314002	4.64163	3.33177e-05	0.000274693	up	-	-	-	-	-	-	-	-
[truncated: 2,607 more rows]
