# Supplementary material for: The Response of Growth and Transcriptome Profiles of Tea Grey Blight Disease Pathogen Pestalotiopsis theae to the Variation of Exogenous L-Theanine
Source: Int J Mol Sci. 2024 Mar 20;25(6):3493. doi: 10.3390/ijms25063493 (PMC10971465; doi:10.3390/ijms25063493)
Supplement: Supplementary file 1 [file ijms-25-03493-s001.zip › ijms-2863686-supplementary/Supplemental Table S5.xlsx]

## Sheet: Th4 vs. Th2
Table S5. DEGs of Th4 vs. Th2 comparison group
Gene id	MeanTPM (Th4)	MeanTPM (Th2)	log2FoldChange	p_Value	QValue	result	CDD	PFAM	KEGG	KOG	Swissprot	GO	NR	NT
TRINITY_DN10004_c1_g1	0.270037	9.39608	-5.12083	0.00024962	0.00606828	down	-	-	-	-	-	-	-	-
TRINITY_DN10010_c0_g1	10.4321	1.95887	2.41293	3.19349e-05	0.00118503	up	sd00045, ANK, ankyrin repeats. Ankyrin repeats are one of the most abundant repeat motifs, and generally function as scaffolds for protein-protein interactions in processes including cell cycle, transcriptional regulation, signal transduction, vesicular trafficking, and inflammatory response. Although predominantly found in eukaryotic proteins, they are also found in some bacterial and viral prot…	pfam12796, Ank_2, Ankyrin repeats (3 copies). 5.05e-08	-	KOG4177, KOG4177, KOG4177, Ankyrin [Cell wall/membrane/envelope biogenesis]. 1.50e-10	sp|Q9VCA8|ANKHM_DROME Ankyrin repeat and KH domain-containing protein mask OS=Drosophila melanogaster GN=mask PE=1 SV=2 2.15e-08	-	CAF3814461.1 unnamed protein product [Rotaria sp. Silwood1] 1.42e-10	-
TRINITY_DN10011_c0_g1	11.603	36.1439	-1.63925	2.45195e-05	0.000958172	down	cd14009, STKc_ATG1_ULK_like, Catalytic domain of the Serine/Threonine kinases, Autophagy-related protein 1 and Unc-51-like kinases. STKs catalyze the transfer of the gamma-phosphoryl group from ATP to serine/threonine residues on protein substrates. This subfamily includes yeast ATG1 and metazoan homologs including vertebrate ULK1-3. The ATG1/ULK complex is conserved from yeast to humans and it p…	-	-	KOG0198, KOG0198, KOG0198, MEKK and related serine/threonine protein kinases [Signal transduction mechanisms]. 1.61e-12	sp|F4JBP3|ATG1B_ARATH Serine/threonine-protein kinase ATG1b OS=Arabidopsis thaliana GN=ATG1B PE=2 SV=1 2.19e-11	-	-	-
TRINITY_DN10014_c0_g1	0.433235	4.19432	-3.27522	0.000124807	0.00351028	down	cd11059, CYP_fungal, unknown subfamily of fungal cytochrome P450s. This subfamily is composed of uncharacterized fungal cytochrome P450s. Cytochrome P450 (P450, CYP) is a large superfamily of heme-containing proteins that catalyze a variety of oxidative reactions of a large number of structurally different endogenous and exogenous compounds in organisms from all major domains of life. CYPs bind t…	pfam00067, p450, Cytochrome P450. Cytochrome P450s are haem-thiolate proteins involved in the oxidative degradation of various compounds. They are particularly well known for their role in the degradation of environmental toxins and mutagens. They can be divided into 4 classes, according to the method by which electrons from NAD(P)H are delivered to the catalytic site. Sequence conservation is re…	-	KOG0157, KOG0157, KOG0157, Cytochrome P450 CYP4/CYP19/CYP26 subfamilies [Secondary metabolites biosynthesis, transport and catabolism, Lipid transport and metabolism]. 5.28e-30	sp|Q12608|STCB_EMENI Probable sterigmatocystin biosynthesis P450 monooxygenase STCB OS=Emericella nidulans (strain FGSC A4 / ATCC 38163 / CBS 112.46 / NRRL 194 / M139) GN=stcB PE=3 SV=2 1.91e-98	-	KAG4071074.1 hypothetical protein HA402_002746 [Bradysia odoriphaga] 3.08e-40	-
TRINITY_DN10035_c0_g1	8.11557	30.5728	-1.91348	6.91078e-05	0.00219465	down	cd05283, CAD1, Cinnamyl alcohol dehydrogenases (CAD). Cinnamyl alcohol dehydrogenases (CAD), members of the medium chain dehydrogenase/reductase family, reduce cinnamaldehydes to cinnamyl alcohols in the last step of monolignal metabolism in plant cells walls. CAD binds 2 zinc ions and is NADPH- dependent. CAD family members are also found in non-plant species, e.g. in yeast where they have an al…	pfam01532, Glyco_hydro_47, Glycosyl hydrolase family 47. Members of this family are alpha-mannosidases that catalyze the hydrolysis of the terminal 1,2-linked alpha-D-mannose residues in the oligo-mannose oligosaccharide Man(9)(GlcNAc)(2). 8.30e-123	K01230-ko00510 N-Glycan biosynthesis;ko04141 Protein processing in endoplasmic reticulum;ko00513 Various types of N-glycan biosynthesis	KOG0023, KOG0023, KOG0023, Alcohol dehydrogenase, class V [Secondary metabolites biosynthesis, transport and catabolism]. 1.00e-65	sp|Q04894|ADH6_YEAST NADP-dependent alcohol dehydrogenase 6 OS=Saccharomyces cerevisiae (strain ATCC 204508 / S288c) GN=ADH6 PE=1 SV=1 7.86e-87	-	XP_023687302.1 endoplasmic reticulum mannosyl-oligosaccharide 1,2-alpha-mannosidase-like isoform X2 [Paramormyrops kingsleyae] 8.55e-67	-
TRINITY_DN10042_c0_g1	4.64175	17.5707	-1.92043	0.000643664	0.0122894	down	-	-	-	-	-	-	-	-
TRINITY_DN10045_c0_g1	0.213008	1.53587	-2.85008	0.000102048	0.00300492	down	cd20305, cupin_OxDC_C, Oxalate decarboxylase (OxDC), C-terminal cupin domain. This model represents the C-terminal cupin domain of oxalate decarboxylase (OxDC; EC 4.1.1.2), a manganese-dependent bicupin that catalyzes the conversion of oxalate to formate and carbon dioxide, utilizing dioxygen as a cofactor. It is evolutionarily related to oxalate oxidase (OxOx or germin; EC 1.2.3.4) which, in con…	pfam00190, Cupin_1, Cupin. This family represents the conserved barrel domain of the 'cupin' superfamily ('cupa' is the Latin term for a small barrel). This family contains 11S and 7S plant seed storage proteins, and germins. Plant seed storage proteins provide the major nitrogen source for the developing plant. 1.41e-07	-	-	sp|O34714|OXDC_BACSU Oxalate decarboxylase OxdC OS=Bacillus subtilis (strain 168) GN=oxdC PE=1 SV=1 9.52e-112	-	CAD7635339.1 unnamed protein product [Medioppia subpectinata] >CAG2115769.1 unnamed protein product [Medioppia subpectinata] 1.50e-91	-
TRINITY_DN10049_c0_g1	63.5869	172.052	-1.43604	0.00280492	0.0356123	down	-	pfam00324, AA_permease, Amino acid permease. 3.12e-73	-	KOG1286, KOG1286, KOG1286, Amino acid transporters [Amino acid transport and metabolism]. 5.67e-88	sp|Q9P768|YI26_SCHPO Uncharacterized amino-acid permease P7G5.06 OS=Schizosaccharomyces pombe (strain 972 / ATCC 24843) GN=SPAP7G5.06 PE=3 SV=1 1.35e-123	GO:0000139, Golgi membrane;GO:0000322, storage vacuole;GO:0000323, lytic vacuole;GO:0000324, fungal-type vacuole;GO:0003333, amino acid transmembrane transport;GO:0003674, molecular_function;GO:0005215, transporter activity;GO:0005342, organic acid transmembrane transporter activity;GO:0005575, cellular_component;GO:0005622, intracellular;GO:0005623, cell;GO:0005737, cytoplasm;GO:0005773, vacuole…	CAF0984196.1 unnamed protein product [Didymodactylos carnosus] >CAF3756523.1 unnamed protein product [Didymodactylos carnosus] 2.89e-150	-
TRINITY_DN10057_c0_g1	0.435348	5.58235	-3.68063	4.51033e-07	3.62677e-05	down	-	-	-	-	-	-	-	-
TRINITY_DN10060_c0_g1	0.469591	2.53248	-2.43107	0.00279983	0.0356123	down	cd19121, AKR_AKR3D1, AKR3D family of aldo-keto reductase (AKR). Trichoderma reesei D-galacturonate reductase (GAR1, EC 1.1.1.365), also called D-galacturonic acid reductase, or GalUR, is a founding member of aldo-keto reductase family 3 member D1 (AKR3D1). It mediates the reduction of D-galacturonate to L-galactonate, the first step in D-galacturonate catabolic process. It also has activity with …	pfam00248, Aldo_ket_red, Aldo/keto reductase family. This family includes a number of K+ ion channel beta chain regulatory domains - these are reported to have oxidoreductase activity. 8.18e-18	K18097-ko00561 Glycerolipid metabolism	KOG1577, KOG1577, KOG1577, Aldo/keto reductase family proteins [General function prediction only]. 4.37e-56	sp|Q3ZFI7|GAR1_HYPJE D-galacturonate reductase OS=Hypocrea jecorina GN=gar1 PE=1 SV=1 3.22e-06	-	GIY40882.1 aldo-keto reductase family 1 member A1 [Caerostris darwini] 6.60e-55	-
TRINITY_DN10062_c0_g1	0.521902	4.0489	-2.95568	2.06632e-06	0.000127684	down	-	-	-	-	-	-	-	-
TRINITY_DN10064_c0_g1	1.34766	8.32783	-2.62749	0.00357402	0.0419387	down	-	-	-	-	-	-	-	-
TRINITY_DN10070_c0_g1	0.698047	2.72542	-1.96508	0.000106934	0.00309788	down	cd09597, M4_TLP, Peptidase M4 family including thermolysin, protealysin, aureolysin, and neutral protease. This peptidase M4 family includes several endopeptidases such as thermolysin (EC 3.4.24.27), aureolysin (the extracellular metalloproteinase from Staphylococcus aureus), neutral protease from Bacillus cereus, protealysin, and bacillolysin (EC 3.4.24.28). Typically, the M4 peptidases consist …	pfam01447, Peptidase_M4, Thermolysin metallopeptidase, catalytic domain. 4.00e-13	-	-	sp|A9YWT8|PRTS_PHOAZ Protease PrtS OS=Photorhabdus sp. (strain Az29) GN=prtS PE=1 SV=1 7.23e-31	-	XP_018401244.1 PREDICTED: extracellular metalloprotease-like [Cyphomyrmex costatus] 3.18e-23	-
TRINITY_DN10079_c0_g1	0.617513	6.49237	-3.3942	8.67195e-06	0.000423272	down	-	-	-	-	-	-	-	-
TRINITY_DN10104_c0_g1	45.2304	9.98786	2.17905	7.23374e-05	0.00227419	up	cd03672, Dcp2p, mRNA decapping enzyme 2 (Dcp2p), the catalytic subunit, and Dcp1p are the two components of the decapping enzyme complex. Decapping is a key step in both general and nonsense-mediated 5'->3' mRNA-decay pathways. Dcp2p contains an all-alpha helical N-terminal domain and a C-terminal domain which has the Nudix fold. While decapping is not dependent on the N-terminus of Dcp2p, it doe…	pfam05026, DCP2, Dcp2, box A domain. This domain is always found to the amino terminal side of pfam00293. This domain is specific to mRNA decapping protein 2 and this region has been termed Box A. Removal of the cap structure is catalyzed by the Dcp1-Dcp2 complex. 3.63e-28	K12613-ko03018 RNA degradation	KOG2937, KOG2937, KOG2937, Decapping enzyme complex, predicted pyrophosphatase DCP2 [RNA processing and modification]. 2.97e-10	sp|O13828|DCP2_SCHPO mRNA decapping complex subunit 2 OS=Schizosaccharomyces pombe (strain 972 / ATCC 24843) GN=dcp2 PE=1 SV=1 9.29e-75	GO:0000166, nucleotide binding;GO:0000287, magnesium ion binding;GO:0000288, nuclear-transcribed mRNA catabolic process, deadenylation-dependent decay;GO:0000290, deadenylation-dependent decapping of nuclear-transcribed mRNA;GO:0000291, nuclear-transcribed mRNA catabolic process, exonucleolytic;GO:0000932, P-body;GO:0000956, nuclear-transcribed mRNA catabolic process;GO:0003674, molecular_functio…	KAJ3011576.1 mRNA-decapping enzyme subunit 2 [Siphonaria sp. JEL0065] 3.06e-63	-
TRINITY_DN10112_c0_g1	235.863	68.458	1.78466	0.00232779	0.0314992	up	cd11066, CYP_PhacA-like, fungal cytochrome P450s similar to Aspergillus nidulans phenylacetate 2-hydroxylase. This group includes Aspergillus nidulans phenylacetate 2-hydroxylase (encoded by the phacA gene) and similar fungal cytochrome P450s. PhacA catalyzes the ortho-hydroxylation of phenylacetate, the first step of A. nidulans phenylacetate catabolism. The PhacA-like subfamily belongs to the l…	pfam00067, p450, Cytochrome P450. Cytochrome P450s are haem-thiolate proteins involved in the oxidative degradation of various compounds. They are particularly well known for their role in the degradation of environmental toxins and mutagens. They can be divided into 4 classes, according to the method by which electrons from NAD(P)H are delivered to the catalytic site. Sequence conservation is re…	K10437-ko00643 Styrene degradation;ko00360 Phenylalanine metabolism	KOG0156, KOG0156, KOG0156, Cytochrome P450 CYP2 subfamily [Secondary metabolites biosynthesis, transport and catabolism]. 5.76e-25	sp|Q9Y7G5|PHACA_EMEND Phenylacetate 2-hydroxylase OS=Emericella nidulans GN=phacA PE=1 SV=1 0.0	GO:0003674, molecular_function;GO:0003824, catalytic activity;GO:0004497, monooxygenase activity;GO:0006082, organic acid metabolic process;GO:0006725, cellular aromatic compound metabolic process;GO:0006790, sulfur compound metabolic process;GO:0006805, xenobiotic metabolic process;GO:0006807, nitrogen compound metabolic process;GO:0008150, biological_process;GO:0008152, metabolic process;GO:000…	CAF0960268.1 unnamed protein product [Rotaria sordida] 8.64e-218	-
TRINITY_DN10118_c0_g1	19.7375	4.88203	2.01539	0.00235861	0.0318476	up	-	-	-	KOG2468, KOG2468, KOG2468, Dolichol kinase [Lipid transport and metabolism]. 6.99e-21	sp|Q9Y7T6|SEC59_SCHPO Dolichol kinase sec59 OS=Schizosaccharomyces pombe (strain 972 / ATCC 24843) GN=sec59 PE=3 SV=3 1.83e-27	GO:0003674, molecular_function;GO:0003824, catalytic activity;GO:0004168, dolichol kinase activity;GO:0005575, cellular_component;GO:0005622, intracellular;GO:0005623, cell;GO:0005737, cytoplasm;GO:0005783, endoplasmic reticulum;GO:0005789, endoplasmic reticulum membrane;GO:0006464, cellular protein modification process;GO:0006486, protein glycosylation;GO:0006487, protein N-linked glycosylation;…	KXJ11908.1 Dolichol kinase [Exaiptasia diaphana] 1.66e-25	-
TRINITY_DN10123_c0_g1	2.41082	4.98991	-1.04949	0.00273739	0.035066	down	cd19525, RecA-like_Figl-1, ATPase domain of Fidgetin-Like 1 (FIGL-1). FIGL-1 may participate in DNA repair in the nucleus; it may be involved in DNA double-strand break repair via homologous recombination. Caenorhabditis elegans FIGL-1 is a nuclear protein and controls the mitotic progression in the germ line and mouse FIGL-1 may be involved in the control of male meiosis. human FIGL-1 has been s…	pfam00004, AAA, ATPase family associated with various cellular activities (AAA). AAA family proteins often perform chaperone-like functions that assist in the assembly, operation, or disassembly of protein complexes. 1.08e-06	-	KOG0742, KOG0742, KOG0742, AAA+-type ATPase [Posttranslational modification, protein turnover, chaperones]. 4.97e-11	sp|Q5T9A4|ATD3B_HUMAN ATPase family AAA domain-containing protein 3B OS=Homo sapiens GN=ATAD3B PE=1 SV=1 1.08e-06	-	KAJ3018814.1 hypothetical protein HDU68_010978 [Siphonaria sp. JEL0065] 3.01e-36	-
TRINITY_DN10126_c0_g1	7.18227	29.2185	-2.02437	3.98434e-05	0.00141185	down	cd17327, MFS_FEN2_like, Pantothenate transporter FEN2 and similar transporters of the Major Facilitator Superfamily. This family is composed of Saccharomyces cerevisiae pantothenate transporter FEN2 (or fenpropimorph resistance protein 2) and similar proteins from fungi and bacteria including fungal vitamin H transporter, allantoate permease, and high-affinity nicotinic acid transporter, as well …	-	-	KOG2533, KOG2533, KOG2533, Permease of the major facilitator superfamily [Carbohydrate transport and metabolism]. 1.90e-40	sp|Q9P6J0|YHDC_SCHPO Uncharacterized transporter C1683.12 OS=Schizosaccharomyces pombe (strain 972 / ATCC 24843) GN=SPBC1683.12 PE=3 SV=1 4.27e-59	-	CAF3294729.1 unnamed protein product [Rotaria socialis] >CAF3430431.1 unnamed protein product [Rotaria socialis] >CAF4159605.1 unnamed protein product [Rotaria socialis] >CAF4406616.1 unnamed protein product [Rotaria socialis] 1.49e-73	-
TRINITY_DN10136_c0_g1	18.3561	79.3215	-2.11145	3.83105e-07	3.16162e-05	down	cd17358, MFS_GLUT6_8_Class3_like, Glucose transporter (GLUT) types 6 and 8, Class 3 GLUTs, and similar transporters of the Major Facilitator Superfamily. This subfamily is composed of glucose transporter type 6 (GLUT6), GLUT8, plant early dehydration-induced gene ERD6-like proteins, and similar insect proteins including facilitated trehalose transporter Tret1-1. GLUTs, also called Solute carrier …	pfam00083, Sugar_tr, Sugar (and other) transporter. 5.06e-28	-	KOG0254, KOG0254, KOG0254, Predicted transporter (major facilitator superfamily) [General function prediction only]. 8.18e-38	sp|A6ZX88|MPH3_YEAS7 Alpha-glucosides permease MPH3 OS=Saccharomyces cerevisiae (strain YJM789) GN=MPH3 PE=3 SV=1 8.14e-87	-	CAF1444061.1 unnamed protein product [Adineta ricciae] 1.59e-36	-
TRINITY_DN10158_c0_g1	6.48861	23.925	-1.88254	6.98712e-06	0.000360685	down	cd01158, SCAD_SBCAD, Short chain acyl-CoA dehydrogenases and eukaryotic short/branched chain acyl-CoA dehydrogenases. Short chain acyl-CoA dehydrogenase (SCAD). SCAD is a mitochondrial beta-oxidation enzyme. It catalyzes the alpha,beta dehydrogenation of the corresponding trans-enoyl-CoA by FAD, which becomes reduced. The reduced form of SCAD is reoxidized in the oxidative half-reaction by electr…	pfam00441, Acyl-CoA_dh_1, Acyl-CoA dehydrogenase, C-terminal domain. C-terminal domain of Acyl-CoA dehydrogenase is an all-alpha, four helical up-and-down bundle. 7.60e-07	K19823-ko00910 Nitrogen metabolism	KOG0139, KOG0139, KOG0139, Short-chain acyl-CoA dehydrogenase [Lipid transport and metabolism]. 1.15e-12	sp|Q8X1D8|NAO_FUSOX Nitroalkane oxidase OS=Fusarium oxysporum PE=1 SV=1 1.45e-151	-	CAF1081143.1 unnamed protein product [Didymodactylos carnosus] >CAF3844097.1 unnamed protein product [Didymodactylos carnosus] 1.11e-102	-
TRINITY_DN10159_c0_g1	7.41856	18.2629	-1.2997	0.00106152	0.0178048	down	cd17358, MFS_GLUT6_8_Class3_like, Glucose transporter (GLUT) types 6 and 8, Class 3 GLUTs, and similar transporters of the Major Facilitator Superfamily. This subfamily is composed of glucose transporter type 6 (GLUT6), GLUT8, plant early dehydration-induced gene ERD6-like proteins, and similar insect proteins including facilitated trehalose transporter Tret1-1. GLUTs, also called Solute carrier …	pfam00083, Sugar_tr, Sugar (and other) transporter. 3.16e-19	-	KOG0254, KOG0254, KOG0254, Predicted transporter (major facilitator superfamily) [General function prediction only]. 3.99e-22	sp|P53048|MAL11_YEAST General alpha-glucoside permease OS=Saccharomyces cerevisiae (strain ATCC 204508 / S288c) GN=MAL11 PE=1 SV=1 4.28e-91	-	KAJ3615968.1 hypothetical protein Zmor_012152 [Zophobas morio] 1.45e-29	-
TRINITY_DN10161_c0_g1	4.6474	65.6795	-3.82095	5.47985e-12	2.45497e-09	down	cd05283, CAD1, Cinnamyl alcohol dehydrogenases (CAD). Cinnamyl alcohol dehydrogenases (CAD), members of the medium chain dehydrogenase/reductase family, reduce cinnamaldehydes to cinnamyl alcohols in the last step of monolignal metabolism in plant cells walls. CAD binds 2 zinc ions and is NADPH- dependent. CAD family members are also found in non-plant species, e.g. in yeast where they have an al…	-	-	KOG0023, KOG0023, KOG0023, Alcohol dehydrogenase, class V [Secondary metabolites biosynthesis, transport and catabolism]. 3.81e-40	sp|P25377|ADH7_YEAST NADP-dependent alcohol dehydrogenase 7 OS=Saccharomyces cerevisiae (strain ATCC 204508 / S288c) GN=ADH7 PE=1 SV=1 7.35e-53	-	CAF0804913.1 unnamed protein product [Didymodactylos carnosus] >CAF3588537.1 unnamed protein product [Didymodactylos carnosus] 5.01e-61	-
TRINITY_DN10166_c0_g3	3.56949	14.0843	-1.9803	0.00218148	0.030183	down	-	-	-	-	-	-	-	-
TRINITY_DN10181_c0_g1	1.11696	19.1397	-4.09892	1.72743e-10	4.51435e-08	down	-	-	-	-	-	-	-	-
TRINITY_DN10183_c0_g1	1.15344	4.36452	-1.91988	0.000356378	0.00789825	down	cd17352, MFS_MCT_SLC16, Monocarboxylate transporter (MCT) family of the Major Facilitator Superfamily of transporters. The animal Monocarboxylate transporter (MCT) family is also called Solute carrier family 16 (SLC16 or SLC16A). It is composed of 14 members, MCT1-14. MCTs play an integral role in cellular metabolism via lactate transport and have been implicated in metabolic synergy in tumors. M…	-	-	KOG2504, KOG2504, KOG2504, Monocarboxylate transporter [Carbohydrate transport and metabolism]. 1.30e-14	sp|Q08777|MCH5_YEAST Riboflavin transporter MCH5 OS=Saccharomyces cerevisiae (strain ATCC 204508 / S288c) GN=MCH5 PE=1 SV=2 2.40e-35	-	KAJ3027069.1 hypothetical protein HDU68_004552 [Siphonaria sp. JEL0065] 1.33e-35	-
TRINITY_DN10188_c0_g1	28.3572	2.98002	3.25032	0.000289127	0.00677496	up	-	-	-	-	-	-	-	-
TRINITY_DN10213_c0_g1	10.063	32.9503	-1.71123	3.20076e-05	0.00118503	down	cd17327, MFS_FEN2_like, Pantothenate transporter FEN2 and similar transporters of the Major Facilitator Superfamily. This family is composed of Saccharomyces cerevisiae pantothenate transporter FEN2 (or fenpropimorph resistance protein 2) and similar proteins from fungi and bacteria including fungal vitamin H transporter, allantoate permease, and high-affinity nicotinic acid transporter, as well …	-	-	KOG2533, KOG2533, KOG2533, Permease of the major facilitator superfamily [Carbohydrate transport and metabolism]. 3.28e-35	sp|Q9P6J0|YHDC_SCHPO Uncharacterized transporter C1683.12 OS=Schizosaccharomyces pombe (strain 972 / ATCC 24843) GN=SPBC1683.12 PE=3 SV=1 9.12e-60	-	CAF3791682.1 unnamed protein product [Rotaria socialis] >CAF4715844.1 unnamed protein product [Rotaria socialis] 4.71e-105	-
TRINITY_DN10214_c0_g1	59.9495	9.13108	2.71489	1.26192e-05	0.000569407	up	-	-	-	-	-	-	-	-
TRINITY_DN10222_c0_g1	0.872196	9.70491	-3.47599	1.62444e-08	2.14495e-06	down	cd03469, Rieske_RO_Alpha_N, Rieske non-heme iron oxygenase (RO) family, N-terminal Rieske domain of the oxygenase alpha subunit; The RO family comprise a large class of aromatic ring-hydroxylating dioxygenases found predominantly in microorganisms. These enzymes enable microorganisms to tolerate and even exclusively utilize aromatic compounds for growth. ROs consist of two or three components: re…	-	-	-	sp|P0ABR7|YEAW_ECOLI Putative dioxygenase subunit alpha YeaW OS=Escherichia coli (strain K12) GN=yeaW PE=3 SV=1 1.76e-27	-	KMQ81697.1 rieske domain-containing protein, partial [Lasius niger] 7.66e-46	-
TRINITY_DN10225_c0_g1	363.574	32.0136	3.50549	1.60676e-06	0.000103893	up	cd07489, Peptidases_S8_5, Peptidase S8 family domain, uncharacterized subfamily 5. gap in seq This family is a member of the Peptidases S8 or Subtilases serine endo- and exo-peptidase clan. They have an Asp/His/Ser catalytic triad similar to that found in trypsin-like proteases, but do not share their three-dimensional structure and are not homologous to trypsin. The stability of subtilases may b…	-	-	-	sp|P29141|SUBV_BACSU Minor extracellular protease vpr OS=Bacillus subtilis (strain 168) GN=vpr PE=1 SV=1 1.58e-19	-	CAF4334628.1 unnamed protein product, partial [Rotaria sp. Silwood2] >CAF4342456.1 unnamed protein product, partial [Rotaria sp. Silwood2] 2.83e-131	-
TRINITY_DN1023_c0_g1	0.270899	8.47555	-4.96748	6.76647e-09	9.75617e-07	down	-	-	-	-	-	-	-	-
TRINITY_DN10232_c0_g1	10.098	2.02498	2.31809	0.00386231	0.0438682	up	-	-	-	-	-	-	-	-
TRINITY_DN10236_c0_g1	0.0597207	12.8962	-7.7545	1.35429e-08	1.86683e-06	down	-	-	-	-	-	-	-	-
TRINITY_DN10238_c0_g1	0.761591	3.01471	-1.98493	6.8373e-05	0.00218237	down	cd03232, ABCG_PDR_domain2, Second domain of the pleiotropic drug resistance-like (PDR) subfamily G of ATP-binding cassette transporters. The pleiotropic drug resistance (PDR) is a well-described phenomenon occurring in fungi and shares several similarities with processes in bacteria and higher eukaryotes. This PDR subfamily represents domain I of its (ABC-IM)2 organization. ABC transporters are a…	pfam01061, ABC2_membrane, ABC-2 type transporter. 5.76e-07	-	KOG0065, KOG0065, KOG0065, Pleiotropic drug resistance proteins (PDR1-15), ABC superfamily [Secondary metabolites biosynthesis, transport and catabolism]. 3.91e-43	sp|P41820|BFR1_SCHPO Brefeldin A resistance protein OS=Schizosaccharomyces pombe (strain 972 / ATCC 24843) GN=bfr1 PE=1 SV=1 0.0	GO:0003674, molecular_function;GO:0003824, catalytic activity;GO:0005215, transporter activity;GO:0005342, organic acid transmembrane transporter activity;GO:0005575, cellular_component;GO:0005622, intracellular;GO:0005623, cell;GO:0005737, cytoplasm;GO:0005739, mitochondrion;GO:0005829, cytosol;GO:0005886, plasma membrane;GO:0006810, transport;GO:0006855, drug transmembrane transport;GO:0006873,…	KAJ3009872.1 hypothetical protein HDU68_002453, partial [Siphonaria sp. JEL0065] 8.68e-221	-
TRINITY_DN10241_c0_g1	1.37701	12.6468	-3.19917	0.000338692	0.00764128	down	-	-	-	-	-	-	CAF3754153.1 unnamed protein product [Rotaria sp. Silwood1] 7.56e-06	-
TRINITY_DN10244_c0_g1	0.222586	4.19637	-4.23671	6.87911e-07	5.22222e-05	down	-	-	K00838-ko00401 Novobiocin biosynthesis;ko00350 Tyrosine metabolism;ko00300 Lysine biosynthesis;ko01230 Biosynthesis of amino acids;ko00360 Phenylalanine metabolism;ko00270 Cysteine and methionine metabolism;ko00400 Phenylalanine, tyrosine and tryptophan biosynthesis;ko01210 2-Oxocarboxylic acid metabolism;ko00960 Tropane, piperidine and pyridine alkaloid biosynthesis;ko00380 Tryptophan metabolism…	KOG0634, KOG0634, KOG0634, Aromatic amino acid aminotransferase and related proteins [Amino acid transport and metabolism]. 8.02e-116	sp|O14192|AATR1_SCHPO Aromatic amino acid aminotransferase C56E4.03 OS=Schizosaccharomyces pombe (strain 972 / ATCC 24843) GN=SPAC56E4.03 PE=3 SV=1 8.35e-123	GO:0003674, molecular_function;GO:0003824, catalytic activity;GO:0005575, cellular_component;GO:0005622, intracellular;GO:0005623, cell;GO:0005737, cytoplasm;GO:0006082, organic acid metabolic process;GO:0006520, cellular amino acid metabolic process;GO:0006725, cellular aromatic compound metabolic process;GO:0006807, nitrogen compound metabolic process;GO:0008150, biological_process;GO:0008152, …	XP_037686938.1 kynurenine/alpha-aminoadipate aminotransferase, mitochondrial isoform X1 [Choloepus didactylus] >XP_037686939.1 kynurenine/alpha-aminoadipate aminotransferase, mitochondrial isoform X1 [Choloepus didactylus] >XP_037686940.1 kynurenine/alpha-aminoadipate aminotransferase, mitochondrial isoform X1 [Choloepus didactylus] >XP_037686941.1 kynurenine/alpha-aminoadipate aminotransferase, …	-
TRINITY_DN10251_c0_g1	340.183	83.0882	2.0336	7.71748e-05	0.00239032	up	-	-	-	-	sp|C4YKP5|IR221_CANAW Increased recombination centers protein 22-1 OS=Candida albicans (strain WO-1) GN=IRC22-1 PE=3 SV=1 8.40e-12	GO:0005575, cellular_component;GO:0005623, cell;GO:0005886, plasma membrane;GO:0016020, membrane;GO:0044464, cell part;GO:0071944, cell periphery	-	-
TRINITY_DN10257_c0_g1	37.2817	191.101	-2.35779	1.27659e-09	2.39008e-07	down	-	-	-	KOG0769, KOG0769, KOG0769, Predicted mitochondrial carrier protein [Energy production and conversion]. 1.10e-28	sp|Q75A82|ANT1_ASHGO Peroxisomal adenine nucleotide transporter 1 OS=Ashbya gossypii (strain ATCC 10895 / CBS 109.51 / FGSC 9923 / NRRL Y-1056) GN=ANT1 PE=3 SV=1 2.47e-39	GO:0000295, adenine nucleotide transmembrane transporter activity;GO:0003674, molecular_function;GO:0005215, transporter activity;GO:0005575, cellular_component;GO:0005622, intracellular;GO:0005623, cell;GO:0005737, cytoplasm;GO:0005739, mitochondrion;GO:0005740, mitochondrial envelope;GO:0005743, mitochondrial inner membrane;GO:0005777, peroxisome;GO:0005778, peroxisomal membrane;GO:0005779, int…	KAJ3030570.1 ADP/ATP carrier protein [Siphonaria sp. JEL0065] 1.92e-33	-
TRINITY_DN10270_c0_g1	26.5374	7.05599	1.91111	0.00168458	0.0254595	up	-	pfam03901, Glyco_transf_22, Alg9-like mannosyltransferase family. Members of this family are mannosyltransferase enzymes. At least some members are localized in endoplasmic reticulum and involved in GPI anchor biosynthesis. 2.08e-39	K03846-ko00510 N-Glycan biosynthesis;ko00513 Various types of N-glycan biosynthesis	KOG2515, KOG2515, KOG2515, Mannosyltransferase [Cell wall/membrane/envelope biogenesis, Intracellular trafficking, secretion, and vesicular transport]. 8.17e-100	sp|Q9P7Q9|ALG9_SCHPO Alpha-1,2-mannosyltransferase alg9 OS=Schizosaccharomyces pombe (strain 972 / ATCC 24843) GN=alg9 PE=3 SV=1 2.52e-108	-	XP_039274855.1 LOW QUALITY PROTEIN: alpha-1,2-mannosyltransferase alg9-like [Nilaparvata lugens] 1.09e-276	-
TRINITY_DN10291_c0_g1	29.4778	5.09157	2.53345	2.94065e-05	0.00111443	up	-	pfam14269, Arylsulfotran_2, Arylsulfotransferase (ASST). 2.23e-82	-	-	-	-	-	-
TRINITY_DN10301_c0_g1	1.41097	3.13991	-1.15403	0.00256973	0.0334732	down	-	-	-	-	sp|Q4I0C5|RDR1_GIBZE Protein RDR1 OS=Gibberella zeae (strain PH-1 / ATCC MYA-4620 / FGSC 9075 / NRRL 31084) GN=RDR1 PE=3 SV=1 0.0	-	-	-
TRINITY_DN10320_c0_g1	4.52866	0.679305	2.73695	0.000304482	0.00704486	up	-	pfam09494, Slx4, Slx4 endonuclease. The Slx4 protein is a heteromeric structure-specific endonuclease found from fungi to mammals. Slx4 with Slx1 acts as a nuclease on branched DNA substrates, particularly simple-Y, 5'-flap, or replication fork structures by cleaving the strand bearing the 5' non-homologous arm at the branch junction and thus generating ligatable nicked products from 5'-flap or r…	-	-	sp|A7F2D1|SLX4_SCLS1 Structure-specific endonuclease subunit slx4 OS=Sclerotinia sclerotiorum (strain ATCC 18683 / 1980 / Ss-1) GN=slx4 PE=3 SV=1 5.53e-74	-	-	-
TRINITY_DN10325_c0_g1	0.226071	1.18826	-2.39401	0.00436833	0.0473198	down	-	pfam00933, Glyco_hydro_3, Glycosyl hydrolase family 3 N terminal domain. 8.90e-27	K05349-ko00500 Starch and sucrose metabolism;ko00940 Phenylpropanoid biosynthesis;ko00460 Cyanoamino acid metabolism	-	sp|Q5BFG8|BGLB_EMENI Beta-glucosidase B OS=Emericella nidulans (strain FGSC A4 / ATCC 38163 / CBS 112.46 / NRRL 194 / M139) GN=bglB PE=1 SV=1 9.77e-179	-	MCL4141981.1 hypothetical protein [Idotea baltica] 2.52e-60	-
TRINITY_DN10348_c0_g1	85.4565	225.563	-1.40027	0.00261545	0.0339279	down	-	-	-	-	-	-	-	-
TRINITY_DN10371_c0_g1	21.1573	3.67387	2.52578	0.00152039	0.023633	up	cd07098, ALDH_F15-22, Aldehyde dehydrogenase family 15A1 and 22A1-like. Aldehyde dehydrogenase family members ALDH15A1 (Saccharomyces cerevisiae YHR039C) and ALDH22A1 (Arabidopsis thaliana, EC=1.2.1.3), and similar sequences, are in this CD. Significant improvement of stress tolerance in tobacco plants was observed by overexpressing the ALDH22A1 gene from maize (Zea mays) and was accompanied by a…	pfam00171, Aldedh, Aldehyde dehydrogenase family. This family of dehydrogenases act on aldehyde substrates. Members use NADP as a cofactor. The family includes the following members: The prototypical members are the aldehyde dehydrogenases EC:1.2.1.3. Succinate-semialdehyde dehydrogenase EC:1.2.1.16. Lactaldehyde dehydrogenase EC:1.2.1.22. Benzaldehyde dehydrogenase EC:1.2.1.28. Methylmalonate-se…	-	KOG2454, KOG2454, KOG2454, Betaine aldehyde dehydrogenase [Energy production and conversion]. 6.80e-170	sp|P38694|MSC7_YEAST Putative aldehyde dehydrogenase-like protein YHR039C OS=Saccharomyces cerevisiae (strain ATCC 204508 / S288c) GN=MSC7 PE=1 SV=1 1.22e-175	GO:0000003, reproduction;GO:0000280, nuclear division;GO:0003674, molecular_function;GO:0003824, catalytic activity;GO:0004029, aldehyde dehydrogenase (NAD) activity;GO:0005575, cellular_component;GO:0005622, intracellular;GO:0005623, cell;GO:0005737, cytoplasm;GO:0005783, endoplasmic reticulum;GO:0006139, nucleobase-containing compound metabolic process;GO:0006259, DNA metabolic process;GO:00063…	CAF4517190.1 unnamed protein product [Rotaria sp. Silwood2] 1.48e-56	-
TRINITY_DN10372_c0_g1	2.15402	7.9212	-1.87868	0.00160457	0.0246061	down	-	-	-	-	-	-	-	-
TRINITY_DN10377_c0_g1	21.9359	5.05468	2.1176	0.000593513	0.0116329	up	cd00143, PP2Cc, Serine/threonine phosphatases, family 2C, catalytic domain; The protein architecture and deduced catalytic mechanism of PP2C phosphatases are similar to the PP1, PP2A, PP2B family of protein Ser/Thr phosphatases, with which PP2C shares no sequence similarity. 5.27e-16	pfam00481, PP2C, Protein phosphatase 2C. Protein phosphatase 2C is a Mn++ or Mg++ dependent protein serine/threonine phosphatase. 1.68e-16	-	KOG0698, KOG0698, KOG0698, Serine/threonine protein phosphatase [Signal transduction mechanisms]. 1.68e-17	sp|O14156|PP2C4_SCHPO Protein phosphatase 2C homolog 4 OS=Schizosaccharomyces pombe (strain 972 / ATCC 24843) GN=ptc4 PE=1 SV=2 2.55e-39	-	KAI1693513.1 heterokaryon incompatibility protein (HET) domain-containing protein [Ditylenchus destructor] 2.05e-28	-
TRINITY_DN10380_c0_g1	167.562	29.5967	2.50118	0.000359316	0.00794564	up	cd05374, 17beta-HSD-like_SDR_c, 17beta hydroxysteroid dehydrogenase-like, classical (c) SDRs. 17beta-hydroxysteroid dehydrogenases are a group of isozymes that catalyze activation and inactivation of estrogen and androgens. SDRs are a functionally diverse family of oxidoreductases that have a single domain with a structurally conserved Rossmann fold (alpha/beta folding pattern with a central beta…	pfam00106, adh_short, short chain dehydrogenase. This family contains a wide variety of dehydrogenases. 1.47e-18	-	KOG1209, KOG1209, KOG1209, 1-Acyl dihydroxyacetone phosphate reductase and related dehydrogenases [Secondary metabolites biosynthesis, transport and catabolism]. 3.42e-40	sp|Q09851|AYR1_SCHPO NADPH-dependent 1-acyldihydroxyacetone phosphate reductase OS=Schizosaccharomyces pombe (strain 972 / ATCC 24843) GN=ayr1 PE=3 SV=2 8.16e-43	-	XP_007450305.1 PREDICTED: NADPH-dependent 1-acyldihydroxyacetone phosphate reductase-like, partial [Lipotes vexillifer] 1.73e-31	-
TRINITY_DN10387_c0_g1	0.223592	5.08979	-4.50867	2.01517e-05	0.000826086	down	-	-	-	-	-	-	CAF3747127.1 unnamed protein product [Rotaria sp. Silwood1] 2.56e-11	-
TRINITY_DN10390_c0_g1	17.3922	4.27829	2.02334	0.00122726	0.0198899	up	-	-	-	-	-	-	-	-
TRINITY_DN10405_c0_g1	19.4346	949.494	-5.61046	3.65897e-07	3.08041e-05	down	-	-	-	-	-	-	-	-
TRINITY_DN10423_c0_g1	1.13322	9.43805	-3.05806	5.12682e-05	0.00174758	down	-	-	-	-	-	-	-	-
TRINITY_DN10440_c0_g1	41.3332	12.1048	1.77172	0.0011123	0.018434	up	cd00200, WD40, WD40 domain, found in a number of eukaryotic proteins that cover a wide variety of functions including adaptor/regulatory modules in signal transduction, pre-mRNA processing and cytoskeleton assembly; typically contains a GH dipeptide 11-24 residues from its N-terminus and the WD dipeptide at its C-terminus and is 40 residues long, hence the name WD40; between GH and WD lies a cons…	-	K03364-ko04120 Ubiquitin mediated proteolysis;ko04111 Cell cycle - yeast;ko04110 Cell cycle;ko04914 Progesterone-mediated oocyte maturation	KOG0305, KOG0305, KOG0305, Anaphase promoting complex, Cdc20, Cdh1, and Ama1 subunits [Cell cycle control, cell division, chromosome partitioning, Posttranslational modification, protein turnover, chaperones]. 2.61e-128	sp|Q9R1K5|FZR_MOUSE Fizzy-related protein homolog OS=Mus musculus GN=Fzr1 PE=1 SV=1 5.36e-149	GO:0000003, reproduction;GO:0003674, molecular_function;GO:0005488, binding;GO:0005575, cellular_component;GO:0006508, proteolysis;GO:0006511, ubiquitin-dependent protein catabolic process;GO:0006807, nitrogen compound metabolic process;GO:0007049, cell cycle;GO:0007050, cell cycle arrest;GO:0007346, regulation of mitotic cell cycle;GO:0008150, biological_process;GO:0008152, metabolic process;GO:…	XP_009045683.1 hypothetical protein LOTGIDRAFT_224232 [Lottia gigantea] >ESP03595.1 hypothetical protein LOTGIDRAFT_224232 [Lottia gigantea] 1.63e-150	-
TRINITY_DN10442_c0_g1	2.74571	9.26051	-1.75391	0.00203012	0.0287631	down	-	-	-	-	-	-	-	-
TRINITY_DN10447_c0_g1	2.98145	0.376773	2.98425	0.0039238	0.0443026	up	-	-	-	-	-	-	-	-
TRINITY_DN10466_c0_g1	5.38681	179.644	-5.05957	3.80624e-12	1.83637e-09	down	-	-	-	-	-	-	-	-
TRINITY_DN10471_c0_g1	39.2402	9.61189	2.02944	0.00198737	0.0283254	up	cd09858, PIN_MKT1, FEN-like PIN domains of Mkt1, a global regulator of mRNAs encoding mitochondrial proteins and eukaryotic homologs. The Mkt1 gene product interacts with the Poly(A)-binding protein associated factor, Pbp1, and is present at the 3' end of RNA transcripts during translation. The Mkt1-Pbp1 complex is involved in the post-transcriptional regulation of HO endonuclease expression. Mkt…	pfam12246, MKT1_C, Temperature dependent protein affecting M2 dsRNA replication. This domain family is found in eukaryotes, and is typically between 231 and 255 amino acids in length. There is a single completely conserved residue P that may be functionally important. MKT1 is required for maintenance of K2 toxin above 30 degrees C in strains with the L-A-HN variant of the L-A double-stranded RNA …	-	-	sp|Q9UTN2|YII1_SCHPO Uncharacterized protein C139.01c OS=Schizosaccharomyces pombe (strain 972 / ATCC 24843) GN=SPAC139.01c PE=1 SV=2 9.70e-22	GO:0000932, P-body;GO:0003674, molecular_function;GO:0003824, catalytic activity;GO:0004518, nuclease activity;GO:0004519, endonuclease activity;GO:0004520, endodeoxyribonuclease activity;GO:0004536, deoxyribonuclease activity;GO:0005575, cellular_component;GO:0005622, intracellular;GO:0005623, cell;GO:0005634, nucleus;GO:0005737, cytoplasm;GO:0005844, polysome;GO:0006139, nucleobase-containing c…	-	-
TRINITY_DN10476_c0_g1	6.50174	0.908925	2.83859	6.38792e-05	0.00209217	up	-	pfam13454, NAD_binding_9, FAD-NAD(P)-binding. 1.65e-18	-	-	sp|Q57NK9|DADA_SALCH D-amino acid dehydrogenase OS=Salmonella choleraesuis (strain SC-B67) GN=dadA PE=3 SV=1 6.83e-10	-	CAF4353432.1 unnamed protein product, partial [Didymodactylos carnosus] 1.11e-86	-
TRINITY_DN10476_c0_g2	6.86725	0.632218	3.44124	0.00226601	0.0308631	up	-	-	-	-	-	-	CAF1401213.1 unnamed protein product [Didymodactylos carnosus] >CAF4295067.1 unnamed protein product [Didymodactylos carnosus] 3.07e-23	-
TRINITY_DN10481_c0_g2	32.6357	388.885	-3.57482	1.29749e-09	2.39349e-07	down	cd17321, MFS_MMR_MDR_like, Methylenomycin A resistance protein (also called MMR peptide) and similar multidrug resistance (MDR) transporters of the Major Facilitator Superfamily. This family is composed of bacterial, fungal, and archaeal multidrug resistance (MDR) transporters including several proteins from Bacilli such as methylenomycin A resistance protein (also called MMR peptide), tetracycli…	-	-	-	sp|P9WG87|Y1250_MYCTU Uncharacterized MFS-type transporter Rv1250 OS=Mycobacterium tuberculosis (strain ATCC 25618 / H37Rv) GN=Rv1250 PE=3 SV=1 1.59e-20	-	KAJ3013035.1 hypothetical protein HDU68_000899 [Siphonaria sp. JEL0065] 8.76e-63	-
TRINITY_DN10487_c0_g1	11.8087	53.8479	-2.18904	0.000648575	0.012321	down	-	-	-	-	sp|Q5BEJ5|AFOF_EMENI FAD-linked oxidoreductase afoF OS=Emericella nidulans (strain FGSC A4 / ATCC 38163 / CBS 112.46 / NRRL 194 / M139) GN=afoF PE=1 SV=1 1.97e-20	-	CAF4971518.1 unnamed protein product [Rotaria sp. Silwood1] 1.33e-14	-
TRINITY_DN10494_c0_g1	35.7938	113.627	-1.66652	4.69431e-05	0.00164945	down	cd00829, SCP-x_thiolase, Thiolase domain associated with sterol carrier protein (SCP)-x isoform and related proteins; SCP-2 has multiple roles in intracellular lipid circulation and metabolism. The N-terminal presequence in the SCP-x isoform represents a peroxisomal 3-ketacyl-Coa thiolase specific for branched-chain acyl CoAs, which is proteolytically cleaved from the sterol carrier protein. 8.95…	-	K08764-ko04146 Peroxisome;ko03320 PPAR signaling pathway;ko00120 Primary bile acid biosynthesis	KOG1406, KOG1406, KOG1406, Peroxisomal 3-ketoacyl-CoA-thiolase P-44/SCP2 [Lipid transport and metabolism]. 1.89e-153	sp|O62742|NLTP_RABIT Non-specific lipid-transfer protein OS=Oryctolagus cuniculus GN=SCP2 PE=1 SV=1 1.62e-147	-	XP_053186029.1 sterol carrier protein 2 [Scomber japonicus] 5.06e-157	PREDICTED: Megalops cyprinoides sterol carrier protein 2a (scp2a), mRNA 5.37e-21
TRINITY_DN10501_c0_g1	2.33029	31.5823	-3.76053	2.69046e-05	0.00103525	down	-	-	-	-	-	-	-	-
TRINITY_DN10513_c0_g1	36.7313	9.28969	1.98331	0.00242003	0.0322725	up	cd08011, M20_ArgE_DapE-like, M20 Peptidases with similarity to acetylornithine deacetylases and succinyl-diaminopimelate desuccinylases. Peptidase M20 family, uncharacterized protein subfamily with similarity to acetylornithine deacetylase/succinyl-diaminopimelate desuccinylase (ArgE/DapE) subfamily. This group includes the hypothetical protein ygeY from Escherichia coli, a putative deacetylase, …	pfam03452, Anp1, Anp1. The members of this family (Anp1, Van1 and Mnn9) are membrane proteins required for proper Golgi function. These proteins co-localize within the cis Golgi, and that they are physically associated in two distinct complexes. 2.29e-11	-	KOG2275, KOG2275, KOG2275, Aminoacylase ACY1 and related metalloexopeptidases [Amino acid transport and metabolism]. 3.47e-12	sp|A6WYL3|DAPE_OCHA4 Succinyl-diaminopimelate desuccinylase OS=Ochrobactrum anthropi (strain ATCC 49188 / DSM 6882 / NCTC 12168) GN=dapE PE=3 SV=1 1.23e-20	-	CAF0768202.1 unnamed protein product [Adineta ricciae] 1.09e-50	-
TRINITY_DN10520_c0_g1	0.604356	16.8825	-4.80399	1.45981e-09	2.54331e-07	down	-	-	-	-	-	-	-	-
TRINITY_DN10523_c0_g1	0.481175	7.79919	-4.01869	2.09744e-06	0.000128972	down	-	-	-	-	-	-	-	-
TRINITY_DN10542_c0_g1	0.0001	3.35418	-15.0337	1.39516e-08	1.88182e-06	down	cd00833, PKS, polyketide synthases (PKSs) polymerize simple fatty acids into a large variety of different products, called polyketides, by successive decarboxylating Claisen condensations. PKSs can be divided into 2 groups, modular type I PKSs consisting of one or more large multifunctional proteins and iterative type II PKSs, complexes of several monofunctional subunits. 3.15e-90	pfam00109, ketoacyl-synt, Beta-ketoacyl synthase, N-terminal domain. The structure of beta-ketoacyl synthase is similar to that of the thiolase family (pfam00108) and also chalcone synthase. The active site of beta-ketoacyl synthase is located between the N and C-terminal domains. The N-terminal domain contains most of the structures involved in dimer formation and also the active site cysteine. …	-	KOG1202, KOG1202, KOG1202, Animal-type fatty acid synthase and related proteins [Lipid transport and metabolism]. 8.12e-26	sp|Q8J0F5|MLCB_PENCI Compactin diketide synthase mokB OS=Penicillium citrinum GN=mlcB PE=1 SV=1 1.80e-95	-	NXD60729.1 ACTS3 synthase [Corvus moneduloides] 1.57e-30	-
TRINITY_DN10544_c0_g1	1.08506	5.252	-2.27509	0.00176043	0.0263833	down	-	-	K01580-ko00410 beta-Alanine metabolism;ko00250 Alanine, aspartate and glutamate metabolism;ko02024 Quorum sensing;ko00430 Taurine and hypotaurine metabolism;ko00650 Butanoate metabolism;ko04727 GABAergic synapse	KOG1383, KOG1383, KOG1383, Glutamate decarboxylase/sphingosine phosphate lyase [Amino acid transport and metabolism]. 6.45e-11	sp|Q9ZPS3|DCE4_ARATH Glutamate decarboxylase 4 OS=Arabidopsis thaliana GN=GAD4 PE=1 SV=1 8.65e-35	-	CAF3619617.1 unnamed protein product [Rotaria sp. Silwood1] >CAF4973411.1 unnamed protein product [Rotaria sp. Silwood1] 7.74e-33	-
TRINITY_DN10570_c0_g1	14.3873	36.8043	-1.35508	0.000979946	0.0166339	down	cd05369, TER_DECR_SDR_a, Trans-2-enoyl-CoA reductase (TER) and 2,4-dienoyl-CoA reductase (DECR), atypical (a) SDR. TTER is a peroxisomal protein with a proposed role in fatty acid elongation. Fatty acid synthesis is known to occur in the both endoplasmic reticulum and mitochondria; peroxisomal TER has been proposed as an additional fatty acid elongation system, it reduces the double bond at C-2 a…	pfam00106, adh_short, short chain dehydrogenase. This family contains a wide variety of dehydrogenases. 3.39e-18	-	KOG1201, KOG1201, KOG1201, Hydroxysteroid 17-beta dehydrogenase 11 [Secondary metabolites biosynthesis, transport and catabolism]. 8.72e-40	sp|P32573|SPS19_YEAST Peroxisomal 2,4-dienoyl-CoA reductase SPS19 OS=Saccharomyces cerevisiae (strain ATCC 204508 / S288c) GN=SPS19 PE=1 SV=4 4.95e-76	-	XP_038048258.1 peroxisomal 2,4-dienoyl-CoA reductase-like isoform X1 [Patiria miniata] 1.25e-48	-
TRINITY_DN10573_c0_g1	27.2603	55.9273	-1.03675	0.00173974	0.0261044	down	-	pfam03986, Autophagy_N, Autophagocytosis associated protein (Atg3), N-terminal domain. Autophagocytosis is a starvation-induced process responsible for transport of cytoplasmic proteins to the lysosome/vacuole. Atg3 is a ubiquitin like modifier that is topologically similar to the canonical E2 enzyme. It catalyzes the conjugation of Atg8 and phosphatidylethanolamine. 1.61e-34	K08343-ko04140 Regulation of autophagy	KOG2981, KOG2981, KOG2981, Protein involved in autophagocytosis during starvation [General function prediction only]. 7.49e-42	sp|Q51LD2|ATG3_MAGO7 Autophagy-related protein 3 OS=Magnaporthe oryzae (strain 70-15 / ATCC MYA-4617 / FGSC 8958) GN=ATG3 PE=3 SV=1 1.48e-155	GO:0000045, autophagosome assembly;GO:0000151, ubiquitin ligase complex;GO:0000153, cytoplasmic ubiquitin ligase complex;GO:0000422, autophagy of mitochondrion;GO:0003674, molecular_function;GO:0003824, catalytic activity;GO:0005575, cellular_component;GO:0005622, intracellular;GO:0005623, cell;GO:0005737, cytoplasm;GO:0005829, cytosol;GO:0006464, cellular protein modification process;GO:0006497,…	RCN32723.1 autophagocytosis associated protein [Ancylostoma caninum] 1.78e-40	-
TRINITY_DN10580_c0_g1	48.6336	233.506	-2.26343	3.79801e-05	0.00135987	down	cd17327, MFS_FEN2_like, Pantothenate transporter FEN2 and similar transporters of the Major Facilitator Superfamily. This family is composed of Saccharomyces cerevisiae pantothenate transporter FEN2 (or fenpropimorph resistance protein 2) and similar proteins from fungi and bacteria including fungal vitamin H transporter, allantoate permease, and high-affinity nicotinic acid transporter, as well …	-	-	KOG2533, KOG2533, KOG2533, Permease of the major facilitator superfamily [Carbohydrate transport and metabolism]. 1.49e-43	sp|Q9US44|YIZG_SCHPO Uncharacterized transporter C1002.16c OS=Schizosaccharomyces pombe (strain 972 / ATCC 24843) GN=SPAC1002.16c PE=3 SV=1 1.18e-62	-	CAF1183618.1 unnamed protein product [Rotaria magnacalcarata] >CAF1643560.1 unnamed protein product [Rotaria magnacalcarata] >CAF2095884.1 unnamed protein product [Rotaria magnacalcarata] >CAF2114159.1 unnamed protein product [Rotaria magnacalcarata] >CAF3757442.1 unnamed protein product [Rotaria magnacalcarata] 2.85e-98	-
TRINITY_DN10583_c0_g1	117.342	381.34	-1.70036	0.000183527	0.00477628	down	-	pfam00755, Carn_acyltransf, Choline/Carnitine o-acyltransferase. 8.04e-134	K00624-ko04146 Peroxisome	KOG3717, KOG3717, KOG3717, Carnitine O-acyltransferase CRAT [Lipid transport and metabolism]. 1.84e-103	sp|Q00614|CACP_CANTR Carnitine O-acetyltransferase, mitochondrial OS=Candida tropicalis GN=CAT2 PE=3 SV=1 2.67e-163	GO:0003674, molecular_function;GO:0003824, catalytic activity;GO:0004092, carnitine O-acetyltransferase activity;GO:0005575, cellular_component;GO:0005622, intracellular;GO:0005623, cell;GO:0005737, cytoplasm;GO:0005739, mitochondrion;GO:0005777, peroxisome;GO:0006575, cellular modified amino acid metabolic process;GO:0006577, amino-acid betaine metabolic process;GO:0006807, nitrogen compound met…	KAJ3027223.1 Carnitine O-acetyltransferase mitochondrial [Siphonaria sp. JEL0065] 1.51e-173	-
TRINITY_DN10587_c0_g1	25.1403	53.0988	-1.07868	0.00292191	0.0367096	down	-	pfam01670, Glyco_hydro_12, Glycosyl hydrolase family 12. 2.52e-12	-	-	sp|Q5BG78|XGEA_EMENI Xyloglucan-specific endo-beta-1,4-glucanase A OS=Emericella nidulans (strain FGSC A4 / ATCC 38163 / CBS 112.46 / NRRL 194 / M139) GN=xgeA PE=1 SV=1 1.67e-12	-	-	-
TRINITY_DN10593_c0_g1	15.3208	1.97214	2.95765	4.37904e-06	0.000246326	up	-	-	-	-	sp|P38680|MTR_NEUCR N amino acid transport system protein OS=Neurospora crassa (strain ATCC 24698 / 74-OR23-1A / CBS 708.71 / DSM 1257 / FGSC 987) GN=mtr PE=3 SV=2 1.47e-160	-	-	-
TRINITY_DN10595_c0_g1	324.565	94.8996	1.77403	0.00112772	0.0186134	up	cd22055, NAC_BTF3, basal transcription factor BTF3. Basal transcription factor 3 (BTF3) plays an important role in the transcriptional regulation linked to growth and development in eukaryotes. In mammals, the BTF3 gene encodes two alternative splicing isoforms, BTF3a and BTF3b. The full length BTF3a protein excites transcription. The shortened BTF3b, which lacks the first 44 amino-terminal exten…	-	K01527-ko04214 Apoptosis - fly	KOG2240, KOG2240, KOG2240, RNA polymerase II general transcription factor BTF3 and related proteins [Transcription]. 6.94e-18	sp|A4RC23|NACB_MAGO7 Nascent polypeptide-associated complex subunit beta OS=Magnaporthe oryzae (strain 70-15 / ATCC MYA-4617 / FGSC 8958) GN=EGD1 PE=3 SV=2 1.23e-41	GO:0003674, molecular_function;GO:0005488, binding;GO:0005515, protein binding;GO:0005575, cellular_component;GO:0005622, intracellular;GO:0005623, cell;GO:0005634, nucleus;GO:0005737, cytoplasm;GO:0005829, cytosol;GO:0005840, ribosome;GO:0005844, polysome;GO:0005854, nascent polypeptide-associated complex;GO:0006457, protein folding;GO:0006458, 'de novo' protein folding;GO:0006605, protein targe…	CAI5640296.1 unnamed protein product [Mustela putorius furo] 1.57e-13	-
TRINITY_DN10597_c0_g1	120.234	301.297	-1.32534	0.000659479	0.0124212	down	-	-	K00953-ko00740 Riboflavin metabolism	KOG2644, KOG2644, KOG2644, 3'-phosphoadenosine 5'-phosphosulfate sulfotransferase (PAPS reductase)/FAD synthetase and related enzymes [Amino acid transport and metabolism, Coenzyme transport and metabolism]. 1.06e-27	sp|O74841|FAD1_SCHPO Probable FAD synthase OS=Schizosaccharomyces pombe (strain 972 / ATCC 24843) GN=SPCC1235.04c PE=3 SV=1 1.37e-39	GO:0003674, molecular_function;GO:0003824, catalytic activity;GO:0003919, FMN adenylyltransferase activity;GO:0005575, cellular_component;GO:0005622, intracellular;GO:0005623, cell;GO:0005737, cytoplasm;GO:0006139, nucleobase-containing compound metabolic process;GO:0006725, cellular aromatic compound metabolic process;GO:0006732, coenzyme metabolic process;GO:0006747, FAD biosynthetic process;GO…	XP_046659478.1 FAD synthase-like [Homalodisca vitripennis] 1.81e-43	-
TRINITY_DN10606_c0_g1	0.251485	2.62341	-3.3829	0.00153741	0.023809	down	cd06179, MFS_TRI12_like, Fungal trichothecene efflux pump (TRI12) of the Major Facilitator Superfamily of transporters. This family includes Fusarium sporotrichioides trichothecene efflux pump (TRI12), which may play a role in F. sporotrichioides self-protection against trichothecenes. TRI12 belongs to the Major Facilitator Superfamily (MFS) of membrane transport proteins, which are thought to fu…	pfam06609, TRI12, Fungal trichothecene efflux pump (TRI12). This family consists of several fungal specific trichothecene efflux pump proteins. Many of the genes involved in trichothecene toxin biosynthesis in Fusarium sporotrichioides are present within a gene cluster.It has been suggested that TRI12 may play a role in F. sporotrichioides self-protection against trichothecenes. 2.20e-15	-	-	-	-	-	-
TRINITY_DN10615_c0_g1	4.50519	17.1356	-1.92734	8.56842e-06	0.000419853	down	cd08201, plant_peroxidase_like_1, Uncharacterized family of plant peroxidase-like proteins. This is a subgroup of heme-dependent peroxidases similar to plant peroxidases. Along with animal peroxidases, these enzymes belong to a group of peroxidases containing a heme prosthetic group (ferriprotoporphyrin IX) which catalyzes a multistep oxidative reaction involving hydrogen peroxide as the electron…	pfam00141, peroxidase, Peroxidase. 2.47e-08	-	-	sp|D4AUF4|WSCD2_ARTBC WSC domain-containing protein ARB_07870 OS=Arthroderma benhamiae (strain ATCC MYA-4681 / CBS 112371) GN=ARB_07870 PE=1 SV=1 2.78e-51	-	KAJ3030707.1 hypothetical protein HDU68_008096 [Siphonaria sp. JEL0065] 6.53e-09	-
TRINITY_DN10620_c0_g2	9.44412	1.78731	2.40163	0.00293924	0.036833	up	cd11064, CYP86A, cytochrome P450 family 86, subfamily A. This subfamily includes several Arabidopsis thaliana cytochrome P450s (CYP86A1, CYP86A2, CYP86A4, among others), Petunia x hybrida CYP86A22, and Vicia sativa CYP94A1 and CYP94A2. They are P450-dependent fatty acid omega-hydroxylases that catalyze the omega-hydroxylation of various fatty acids. CYP86A2 acts on saturated and unsaturated fatty…	pfam00067, p450, Cytochrome P450. Cytochrome P450s are haem-thiolate proteins involved in the oxidative degradation of various compounds. They are particularly well known for their role in the degradation of environmental toxins and mutagens. They can be divided into 4 classes, according to the method by which electrons from NAD(P)H are delivered to the catalytic site. Sequence conservation is re…	-	KOG0157, KOG0157, KOG0157, Cytochrome P450 CYP4/CYP19/CYP26 subfamilies [Secondary metabolites biosynthesis, transport and catabolism, Lipid transport and metabolism]. 1.81e-42	sp|P48422|C86A1_ARATH Cytochrome P450 86A1 OS=Arabidopsis thaliana GN=CYP86A1 PE=1 SV=2 3.54e-57	-	KAJ3025857.1 hypothetical protein HDU68_006584 [Siphonaria sp. JEL0065] 5.94e-53	-
TRINITY_DN10621_c0_g1	13.4052	3.11165	2.10704	0.000484212	0.00997366	up	cd18016, DEXHc_RecQ2_BLM, DEAH-box helicase domain of RecQ2. ATP-dependent DNA helicase Q2 (RecQ2, also called Bloom syndrome protein homolog or BLM) is part of the RecQ family of highly conserved DNA repair helicases that is part of the type II DEAD box helicase superfamily, a diverse family of proteins involved in ATP-dependent RNA or DNA unwinding. This domain contains the ATP-binding region. …	-	K10901-ko03460 Fanconi anemia pathway;ko03440 Homologous recombination	KOG0351, KOG0351, KOG0351, ATP-dependent DNA helicase [Replication, recombination and repair]. 7.72e-79	sp|O88700|BLM_MOUSE Bloom syndrome protein homolog OS=Mus musculus GN=Blm PE=1 SV=1 6.44e-84	-	KAI8508794.1 ATP-dependent DNA helicase Q5 [Branchiostoma belcheri] 9.99e-87	-
TRINITY_DN10630_c0_g1	6.47857	1.50658	2.1044	0.00253237	0.0331939	up	-	-	-	-	sp|D7UQ40|SOL5_ALTSO Bifunctional solanapyrone synthase OS=Alternaria solani GN=sol5 PE=1 SV=1 5.92e-14	-	CAF1336555.1 unnamed protein product [Adineta steineri] >CAF1591448.1 unnamed protein product [Adineta steineri] 2.57e-07	-
TRINITY_DN10641_c0_g1	4.36134	50.3913	-3.53033	1.80686e-07	1.61068e-05	down	-	-	-	-	-	-	-	-
TRINITY_DN10642_c0_g1	2.06187	0.12852	4.00389	0.00136328	0.0216468	up	cd02995, PDI_a_PDI_a'_C, PDIa family, C-terminal TRX domain (a') subfamily; composed of the C-terminal redox active a' domains of PDI, ERp72, ERp57 (or ERp60) and EFP1. PDI, ERp72 and ERp57 are endoplasmic reticulum (ER)-resident eukaryotic proteins involved in oxidative protein folding. They are oxidases, catalyzing the formation of disulfide bonds of newly synthesized polypeptides in the ER. Th…	pfam00085, Thioredoxin, Thioredoxin. Thioredoxins are small enzymes that participate in redox reactions, via the reversible oxidation of an active centre disulfide bond. Some members with only the active site are not separated from the noise. 2.16e-17	K09580-ko04141 Protein processing in endoplasmic reticulum	KOG0190, KOG0190, KOG0190, Protein disulfide isomerase (prolyl 4-hydroxylase beta subunit) [Posttranslational modification, protein turnover, chaperones]. 1.50e-16	sp|P07237|PDIA1_HUMAN Protein disulfide-isomerase OS=Homo sapiens GN=P4HB PE=1 SV=3 0.0	GO:0001666, response to hypoxia;GO:0003674, molecular_function;GO:0003756, protein disulfide isomerase activity;GO:0003810, protein-glutamine gamma-glutamyltransferase activity;GO:0003824, catalytic activity;GO:0004656, procollagen-proline 4-dioxygenase activity;GO:0005102, signaling receptor binding;GO:0005178, integrin binding;GO:0005488, binding;GO:0005515, protein binding;GO:0005575, cellular…	XP_004040818.1 protein disulfide-isomerase [Gorilla gorilla gorilla] 0.0	Homo sapiens prolyl 4-hydroxylase subunit beta (P4HB), mRNA 0.0
TRINITY_DN10664_c0_g1	12.9971	30.3303	-1.22257	0.00271937	0.0349864	down	-	-	-	-	-	-	-	-
TRINITY_DN10677_c0_g1	1.50219	66.2046	-5.46179	2.25377e-06	0.00013592	down	-	-	-	-	-	-	-	-
TRINITY_DN10689_c0_g1	3.79106	8.8316	-1.22008	0.00243548	0.032363	down	cd13426, Peptidase_G1, Peptidases of the G1 family, including scytalidoglutamic peptidase and aspergillopepsin. Some members of this family had been classified earlier as carboxyl peptidases insensitive to pepstatin, and the family has also been called the eqolisin family, due to the fact that the conserved catalytic dyad of the family consists of a glutamate (E) and glutamine (Q) residue. The fa…	pfam01828, Peptidase_A4, Peptidase A4 family. 1.14e-45	-	-	sp|P24665|PRTA_ASPNG Aspergillopepsin-2 OS=Aspergillus niger PE=1 SV=1 3.43e-55	-	MCL4109812.1 hypothetical protein [Idotea baltica] 9.90e-26	-
TRINITY_DN10699_c0_g1	6.06042	47.2288	-2.96218	1.4992e-07	1.40343e-05	down	-	-	-	KOG0767, KOG0767, KOG0767, Mitochondrial phosphate carrier protein [Energy production and conversion]. 3.67e-53	sp|P23641|MPCP_YEAST Mitochondrial phosphate carrier protein OS=Saccharomyces cerevisiae (strain ATCC 204508 / S288c) GN=MIR1 PE=1 SV=1 3.78e-92	GO:0003674, molecular_function;GO:0005215, transporter activity;GO:0005315, inorganic phosphate transmembrane transporter activity;GO:0005575, cellular_component;GO:0005622, intracellular;GO:0005623, cell;GO:0005737, cytoplasm;GO:0005739, mitochondrion;GO:0005740, mitochondrial envelope;GO:0005743, mitochondrial inner membrane;GO:0006810, transport;GO:0006811, ion transport;GO:0006817, phosphate …	KAJ3030577.1 hypothetical protein HDU68_008470 [Siphonaria sp. JEL0065] 4.44e-79	-
TRINITY_DN10705_c0_g1	17.6123	3.63869	2.27509	0.000815864	0.0144551	up	-	-	-	-	-	-	-	-
TRINITY_DN10718_c0_g1	4.17195	19.3335	-2.21231	0.00380769	0.0435861	down	-	-	-	-	-	-	-	-
TRINITY_DN10725_c0_g1	10.1014	2.23865	2.17386	0.000896332	0.0155244	up	-	pfam06985, HET, Heterokaryon incompatibility protein (HET). This family represents a conserved region approximately 150 residues long within various heterokaryon incompatibility proteins that seem to be restricted to ascomycete fungi. Genetic differences in specific het genes prevent a viable heterokaryotic fungal cell from being formed by the fusion of filaments from two different wild-type stra…	-	-	sp|Q9UV10|HET6_NEUCR Heterokaryon incompatibility protein 6, OR allele OS=Neurospora crassa (strain ATCC 24698 / 74-OR23-1A / CBS 708.71 / DSM 1257 / FGSC 987) GN=het-6 PE=4 SV=1 5.52e-28	-	KAI1691421.1 heterokaryon incompatibility protein (HET) domain-containing protein [Ditylenchus destructor] 5.77e-28	-
TRINITY_DN10733_c0_g2	0.364512	1.82174	-2.32128	0.00353759	0.0417063	down	-	-	-	-	-	-	-	-
TRINITY_DN10746_c0_g1	0.291102	2.24957	-2.95005	4.74568e-06	0.000263406	down	-	pfam06441, EHN, Epoxide hydrolase N-terminus. This family represents the N-terminal region of the eukaryotic epoxide hydrolase protein. Epoxide hydrolases (EC:3.3.2.3) comprise a group of functionally related enzymes that catalyze the addition of water to oxirane compounds (epoxides), thereby usually generating vicinal trans-diols. EHs have been found in all types of living organisms, including m…	-	KOG2565, KOG2565, KOG2565, Predicted hydrolases or acyltransferases (alpha/beta hydrolase superfamily) [General function prediction only]. 2.28e-34	sp|Q06816|HYEP_STIAD Putative epoxide hydrolase OS=Stigmatella aurantiaca (strain DW4/3-1) GN=STAUR_4299 PE=3 SV=2 1.31e-53	-	CAF1420689.1 unnamed protein product [Rotaria sp. Silwood1] >CAF3663718.1 unnamed protein product [Rotaria sp. Silwood1] 2.01e-54	-
TRINITY_DN10762_c0_g1	1.52561	8.13742	-2.41519	0.000858091	0.0150544	down	-	-	-	-	sp|P43651|AFLR_ASPPA Aflatoxin biosynthesis regulatory protein OS=Aspergillus parasiticus GN=aflR PE=2 SV=3 5.51e-16	-	-	-
TRINITY_DN10763_c0_g1	0.268185	2.28649	-3.09184	0.00161223	0.0246632	down	cd17327, MFS_FEN2_like, Pantothenate transporter FEN2 and similar transporters of the Major Facilitator Superfamily. This family is composed of Saccharomyces cerevisiae pantothenate transporter FEN2 (or fenpropimorph resistance protein 2) and similar proteins from fungi and bacteria including fungal vitamin H transporter, allantoate permease, and high-affinity nicotinic acid transporter, as well …	-	-	KOG2533, KOG2533, KOG2533, Permease of the major facilitator superfamily [Carbohydrate transport and metabolism]. 9.94e-25	sp|Q10097|YAOI_SCHPO Uncharacterized transporter C11D3.18C OS=Schizosaccharomyces pombe (strain 972 / ATCC 24843) GN=SPAC11D3.18c PE=3 SV=1 2.52e-56	-	XP_034140844.1 uncharacterized transporter C1683.12-like [Drosophila guanche] >AEJ82630.1 hypothetical protein 59A_0023g [Zygosaccharomyces bailii] [Saccharomyces cerevisiae] >AQZ11064.1 hypothetical protein BZL39_B09920 [Zygosaccharomyces parabailii] >EGA73576.1 hypothetical protein AWRI796_3837 [Saccharomyces cerevisiae AWRI796] >EGA77667.1 hypothetical protein VIN13_3398 [Saccharomyces cerevis…	-
TRINITY_DN10766_c0_g1	20.2362	3.60062	2.49062	0.000558238	0.011045	up	-	pfam13520, AA_permease_2, Amino acid permease. 1.02e-13	-	KOG1289, KOG1289, KOG1289, Amino acid transporters [Amino acid transport and metabolism]. 1.80e-69	sp|P19807|HNM1_YEAST Choline transport protein OS=Saccharomyces cerevisiae (strain ATCC 204508 / S288c) GN=HNM1 PE=1 SV=1 6.85e-68	-	CAF3007320.1 unnamed protein product [Rotaria socialis] >CAF3316982.1 unnamed protein product [Rotaria socialis] >CAF3448524.1 unnamed protein product [Rotaria socialis] >CAF3510424.1 unnamed protein product [Rotaria socialis] >CAF3621810.1 unnamed protein product [Rotaria socialis] 2.20e-86	-
TRINITY_DN10769_c0_g1	129.211	409.867	-1.66542	2.1639e-05	0.000869313	down	cd05927, LC-FACS_euk, Eukaryotic long-chain fatty acid CoA synthetase (LC-FACS). The members of this family are eukaryotic fatty acid CoA synthetases that activate fatty acids with chain lengths of 12 to 20. LC-FACS catalyzes the formation of fatty acyl-CoA in a two-step reaction: the formation of a fatty acyl-AMP molecule as an intermediate, and the formation of a fatty acyl-CoA. This is a requi…	pfam00501, AMP-binding, AMP-binding enzyme. 3.95e-20	K01897-ko02024 Quorum sensing;ko00071 Fatty acid degradation;ko01212 Fatty acid metabolism;ko04920 Adipocytokine signaling pathway;ko03320 PPAR signaling pathway;ko04146 Peroxisome;ko00061 Fatty acid biosynthesis	KOG1256, KOG1256, KOG1256, Long-chain acyl-CoA synthetases (AMP-forming) [Lipid transport and metabolism]. 1.62e-06	sp|Q8LKS5|LACS7_ARATH Long chain acyl-CoA synthetase 7, peroxisomal OS=Arabidopsis thaliana GN=LACS7 PE=1 SV=2 2.78e-121	GO:0001676, long-chain fatty acid metabolic process;GO:0003674, molecular_function;GO:0003824, catalytic activity;GO:0004467, long-chain fatty acid-CoA ligase activity;GO:0005575, cellular_component;GO:0005622, intracellular;GO:0005623, cell;GO:0005737, cytoplasm;GO:0005739, mitochondrion;GO:0005777, peroxisome;GO:0006082, organic acid metabolic process;GO:0006629, lipid metabolic process;GO:0006…	KAJ3030587.1 hypothetical protein HDU68_008480 [Siphonaria sp. JEL0065] 8.99e-108	-
TRINITY_DN10778_c0_g1	0.257801	5.8697	-4.50895	1.7449e-06	0.000110545	down	-	-	-	-	sp|D4AY86|LYSM6_ARTBC LysM domain-containing protein ARB_01155/01156 OS=Arthroderma benhamiae (strain ATCC MYA-4681 / CBS 112371) GN=ARB_01155/01156 PE=3 SV=2 7.85e-55	-	-	-
TRINITY_DN10780_c0_g1	0.470456	3.13971	-2.7385	3.08564e-05	0.00115541	down	cd17356, MFS_HXT, Fungal Hexose transporter subfamily of the Major Facilitator Superfamily of transporters and similar proteins. The fungal hexose transporter (HXT) subfamily is comprised of functionally redundant proteins that function mainly in the transport of glucose, as well as other sugars such as galactose and fructose. Saccharomyces cerevisiae has 20 genes that encode proteins in this fam…	pfam00083, Sugar_tr, Sugar (and other) transporter. 1.05e-16	-	KOG0254, KOG0254, KOG0254, Predicted transporter (major facilitator superfamily) [General function prediction only]. 2.76e-21	sp|P53048|MAL11_YEAST General alpha-glucoside permease OS=Saccharomyces cerevisiae (strain ATCC 204508 / S288c) GN=MAL11 PE=1 SV=1 1.27e-34	-	CAF0719764.1 unnamed protein product [Adineta steineri] 3.47e-27	-
TRINITY_DN10804_c0_g1	0.264257	4.53774	-4.10196	1.05367e-06	7.38396e-05	down	-	-	-	-	-	-	-	-
TRINITY_DN10813_c0_g1	10.14	2.8943	1.80877	0.00371701	0.0428943	up	cd00840, MPP_Mre11_N, Mre11 nuclease, N-terminal metallophosphatase domain. Mre11 (also known as SbcD in Escherichia coli) is a subunit of the MRX protein complex. This complex includes: Mre11, Rad50, and Xrs2/Nbs1, and plays a vital role in several nuclear processes including DNA double-strand break repair, telomere length maintenance, cell cycle checkpoint control, and meiotic recombination, in…	pfam04152, Mre11_DNA_bind, Mre11 DNA-binding presumed domain. The Mre11 complex is a multi-subunit nuclease that is composed of Mre11, Rad50 and Nbs1/Xrs2, and is involved in checkpoint signalling and DNA replication. Mre11 has an intrinsic DNA-binding activity that is stimulated by Rad50 on its own or in combination with Nbs1. 8.01e-21	K10865-ko03440 Homologous recombination;ko03450 Non-homologous end-joining	KOG2310, KOG2310, KOG2310, DNA repair exonuclease MRE11 [Replication, recombination and repair]. 9.19e-150	sp|Q9C291|MRE11_NEUCR Double-strand break repair protein mus-23 OS=Neurospora crassa (strain ATCC 24698 / 74-OR23-1A / CBS 708.71 / DSM 1257 / FGSC 987) GN=mus-23 PE=3 SV=3 5.10e-17	GO:0000003, reproduction;GO:0000014, single-stranded DNA endodeoxyribonuclease activity;GO:0000075, cell cycle checkpoint;GO:0000077, DNA damage checkpoint;GO:0000217, DNA secondary structure binding;GO:0000228, nuclear chromosome;GO:0000278, mitotic cell cycle;GO:0000280, nuclear division;GO:0000403, Y-form DNA binding;GO:0000706, meiotic DNA double-strand break processing;GO:0000723, telomere m…	XP_028401300.1 double-strand break repair protein MRE11-like isoform X2 [Dendronephthya gigantea] 5.65e-128	-
TRINITY_DN10816_c0_g1	0.0235729	4.38189	-7.53828	8.76933e-08	9.15527e-06	down	-	pfam10528, GLEYA, GLEYA domain. The GLEYA domain is related to lectin-like binding domains found in the S. cerevisiae Flo proteins and the C. glabrata Epa proteins. It is a carbohydrate-binding domain that is found in fungal adhesins (also referred to as agglutinins or flocculins). Adhesins with a GLEYA domain possess a typical N-terminal signal peptide and a domain of conserved sequence repeats,…	-	-	-	-	-	-
TRINITY_DN10819_c0_g1	63.6459	265.686	-2.06158	7.35119e-05	0.00228817	down	-	-	-	-	-	-	-	-
TRINITY_DN10820_c0_g1	1.62707	3.99789	-1.29696	0.00446291	0.0477031	down	-	pfam02538, Hydantoinase_B, Hydantoinase B/oxoprolinase. This family includes N-methylhydaintoinase B which converts hydantoin to N-carbamyl-amino acids, and 5-oxoprolinase EC:3.5.2.9 which catalyzes the formation of L-glutamate from 5-oxo-L-proline. These enzymes are part of the oxoprolinase family and are related to pfam01968. 4.65e-137	K01469-ko00480 Glutathione metabolism	KOG1939, KOG1939, KOG1939, Oxoprolinase [Amino acid transport and metabolism]. 0.0	sp|Q10094|YAOF_SCHPO Uncharacterized protein C11D3.15 OS=Schizosaccharomyces pombe (strain 972 / ATCC 24843) GN=SPAC11D3.15 PE=3 SV=1 0.0	-	XP_044309191.1 5-oxoprolinase [Varanus komodoensis] 0.0	-
TRINITY_DN10823_c0_g1	8.04718	45.9674	-2.51406	0.000164844	0.00440895	down	cd03189, GST_C_GTT1_like, C-terminal, alpha helical domain of GTT1-like Glutathione S-transferases. Glutathione S-transferase (GST) C-terminal domain family, Saccharomyces cerevisiae GTT1-like subfamily; composed of predominantly uncharacterized proteins with similarity to the S. cerevisiae GST protein, GTT1, and the Schizosaccharomyces pombe GST-III. GSTs are cytosolic dimeric proteins involved …	-	K00799-ko00480 Glutathione metabolism;ko00980 Metabolism of xenobiotics by cytochrome P450;ko00982 Drug metabolism - cytochrome P450	KOG0867, KOG0867, KOG0867, Glutathione S-transferase [Posttranslational modification, protein turnover, chaperones]. 2.27e-10	sp|Q9P6M1|GST3_SCHPO Glutathione S-transferase 3 OS=Schizosaccharomyces pombe (strain 972 / ATCC 24843) GN=gst3 PE=1 SV=3 1.08e-17	-	CAF1150567.1 unnamed protein product [Adineta steineri] >CAF1158457.1 unnamed protein product [Adineta steineri] >CAF3663372.1 unnamed protein product [Adineta steineri] >CAF3726259.1 unnamed protein product [Adineta steineri] 7.29e-44	-
TRINITY_DN10846_c0_g1	0.165347	2.91128	-4.13808	1.39366e-06	9.20109e-05	down	cd00833, PKS, polyketide synthases (PKSs) polymerize simple fatty acids into a large variety of different products, called polyketides, by successive decarboxylating Claisen condensations. PKSs can be divided into 2 groups, modular type I PKSs consisting of one or more large multifunctional proteins and iterative type II PKSs, complexes of several monofunctional subunits. 4.79e-76	pfam00109, ketoacyl-synt, Beta-ketoacyl synthase, N-terminal domain. The structure of beta-ketoacyl synthase is similar to that of the thiolase family (pfam00108) and also chalcone synthase. The active site of beta-ketoacyl synthase is located between the N and C-terminal domains. The N-terminal domain contains most of the structures involved in dimer formation and also the active site cysteine. …	-	KOG1202, KOG1202, KOG1202, Animal-type fatty acid synthase and related proteins [Lipid transport and metabolism]. 3.12e-07	sp|D7PHZ2|VRTA_PENAE Non-reducing polyketide synthase vrtA OS=Penicillium aethiopicum GN=vrtA PE=1 SV=1 6.27e-08	GO:0006082, organic acid metabolic process;GO:0006725, cellular aromatic compound metabolic process;GO:0006732, coenzyme metabolic process;GO:0008150, biological_process;GO:0008152, metabolic process;GO:0009058, biosynthetic process;GO:0009108, coenzyme biosynthetic process;GO:0009403, toxin biosynthetic process;GO:0009404, toxin metabolic process;GO:0009987, cellular process;GO:0016053, organic …	CAF1473328.1 unnamed protein product [Adineta ricciae] 3.92e-238	-
TRINITY_DN10846_c0_g2	0.300695	13.7368	-5.5136	0.00360031	0.0420898	down	cd07722, LACTB2-like_MBL-fold, uncharacterized subgroup which includes human lactamase beta 2 and related proteins; MBL-fold metallo hydrolase domain. Includes functionally uncharacterized human lactamase beta 2. Members of this subgroup belong to the MBL-fold metallo-hydrolase superfamily which is comprised mainly of hydrolytic enzymes which carry out a variety of biological functions. The class…	-	-	KOG0813, KOG0813, KOG0813, Glyoxylase [General function prediction only]. 2.44e-17	sp|D7PHZ8|VRTG_PENAE Lactamase-like protein vrtG OS=Penicillium aethiopicum GN=vrtG PE=1 SV=1 2.41e-93	GO:0008150, biological_process;GO:0008152, metabolic process;GO:0009058, biosynthetic process;GO:0019748, secondary metabolic process;GO:0044550, secondary metabolite biosynthetic process	XP_028405952.1 endoribonuclease LACTB2-like isoform X1 [Dendronephthya gigantea] 5.31e-56	-
TRINITY_DN10849_c0_g1	0.0470803	1.76372	-5.22735	0.00226372	0.0308631	down	-	-	-	-	-	-	-	-
TRINITY_DN10855_c0_g2	1.6567	10.2195	-2.62494	1.31167e-05	0.000585537	down	-	pfam00891, Methyltransf_2, O-methyltransferase. This family includes a range of O-methyltransferases. These enzymes utilize S-adenosyl methionine. 3.46e-11	-	KOG3178, KOG3178, KOG3178, Hydroxyindole-O-methyltransferase and related SAM-dependent methyltransferases [General function prediction only]. 4.47e-10	sp|F1DBB3|MPAG_PENBR O-methyltransferase mpaG OS=Penicillium brevicompactum GN=mpaG PE=1 SV=1 9.24e-35	-	RWR99186.1 methyltransferase-like protein, partial [Dinothrombium tinctorium] >RWR99282.1 methyltransferase-like protein, partial [Dinothrombium tinctorium] >RWR99728.1 methyltransferase-like protein, partial [Dinothrombium tinctorium] 1.24e-10	-
TRINITY_DN10866_c0_g1	16.2268	3.51704	2.20594	0.00278486	0.0355374	up	cd09135, PLDc_PGS1_euk_1, Catalytic domain, repeat 1, of eukaryotic PhosphatidylGlycerophosphate Synthases. Catalytic domain, repeat 1, of eukaryotic phosphatidylglycerophosphate (PGP) synthases, also called CDP-diacylglycerol--glycerol-3-phosphate 3-phosphatidyltransferase (EC 2.7.8.5). Eukaryotic PGP synthases are different and unrelated to prokaryotic PGP synthases and yeast phosphatidylserine…	pfam00150, Cellulase, Cellulase (glycosyl hydrolase family 5). 8.72e-15	K00995-ko00564 Glycerophospholipid metabolism	KOG3964, KOG3964, KOG3964, Phosphatidylglycerolphosphate synthase [Lipid transport and metabolism]. 2.65e-110	sp|P23044|GUN_ROBSP Endoglucanase 1 OS=Robillarda sp. (strain Y-20) GN=eg 1 PE=1 SV=2 5.69e-59	GO:0003674, molecular_function;GO:0003824, catalytic activity;GO:0005575, cellular_component;GO:0005622, intracellular;GO:0005623, cell;GO:0005737, cytoplasm;GO:0005739, mitochondrion;GO:0005740, mitochondrial envelope;GO:0006139, nucleobase-containing compound metabolic process;GO:0006220, pyrimidine nucleotide metabolic process;GO:0006221, pyrimidine nucleotide biosynthetic process;GO:0006629, …	XP_034117276.1 CDP-diacylglycerol--glycerol-3-phosphate 3-phosphatidyltransferase, mitochondrial [Drosophila albomicans] 5.16e-78	-
TRINITY_DN10877_c0_g1	8.38644	19.5359	-1.22	0.000277756	0.00659885	down	cd01160, LCAD, Long chain acyl-CoA dehydrogenase. LCAD is an acyl-CoA dehydrogenases (ACAD), which is found in the mitochondria of eukaryotes and in some prokaryotes. It catalyzes the alpha, beta dehydrogenation of the corresponding trans-enoyl-CoA by FAD, which becomes reduced. The reduced form of LCAD is reoxidized in the oxidative half-reaction by electron-transferring flavoprotein (ETF), from…	pfam00441, Acyl-CoA_dh_1, Acyl-CoA dehydrogenase, C-terminal domain. C-terminal domain of Acyl-CoA dehydrogenase is an all-alpha, four helical up-and-down bundle. 4.65e-14	-	KOG0140, KOG0140, KOG0140, Medium-chain acyl-CoA dehydrogenase [Lipid transport and metabolism]. 8.14e-33	sp|C3UVB0|ACD_DESML Glutaryl-CoA dehydrogenase OS=Desulfococcus multivorans GN=Acd PE=1 SV=1 1.35e-36	-	XP_039301234.1 LOW QUALITY PROTEIN: acyl-CoA dehydrogenase apdG-like [Nilaparvata lugens] 2.06e-107	-
TRINITY_DN10877_c0_g2	155.459	438.205	-1.49508	1.26872e-05	0.000570422	down	cd01158, SCAD_SBCAD, Short chain acyl-CoA dehydrogenases and eukaryotic short/branched chain acyl-CoA dehydrogenases. Short chain acyl-CoA dehydrogenase (SCAD). SCAD is a mitochondrial beta-oxidation enzyme. It catalyzes the alpha,beta dehydrogenation of the corresponding trans-enoyl-CoA by FAD, which becomes reduced. The reduced form of SCAD is reoxidized in the oxidative half-reaction by electr…	pfam00441, Acyl-CoA_dh_1, Acyl-CoA dehydrogenase, C-terminal domain. C-terminal domain of Acyl-CoA dehydrogenase is an all-alpha, four helical up-and-down bundle. 1.53e-11	-	KOG0139, KOG0139, KOG0139, Short-chain acyl-CoA dehydrogenase [Lipid transport and metabolism]. 2.48e-42	sp|P45867|ACDA_BACSU Acyl-CoA dehydrogenase OS=Bacillus subtilis (strain 168) GN=acdA PE=2 SV=1 5.89e-39	-	XP_039301234.1 LOW QUALITY PROTEIN: acyl-CoA dehydrogenase apdG-like [Nilaparvata lugens] 0.0	-
TRINITY_DN10879_c0_g1	0.417699	1.38361	-1.7279	0.00455698	0.0483959	down	sd00045, ANK, ankyrin repeats. Ankyrin repeats are one of the most abundant repeat motifs, and generally function as scaffolds for protein-protein interactions in processes including cell cycle, transcriptional regulation, signal transduction, vesicular trafficking, and inflammatory response. Although predominantly found in eukaryotic proteins, they are also found in some bacterial and viral prot…	pfam12796, Ank_2, Ankyrin repeats (3 copies). 8.57e-08	-	KOG4177, KOG4177, KOG4177, Ankyrin [Cell wall/membrane/envelope biogenesis]. 3.42e-18	sp|P16157|ANK1_HUMAN Ankyrin-1 OS=Homo sapiens GN=ANK1 PE=1 SV=3 7.39e-06	-	KAI1694588.1 phosphorylase superfamily domain-containing protein [Ditylenchus destructor] 1.05e-25	-
TRINITY_DN10888_c0_g1	19.2702	72.8524	-1.9186	0.000812632	0.0144233	down	-	pfam04387, PTPLA, Protein tyrosine phosphatase-like protein, PTPLA. This family includes the mammalian protein tyrosine phosphatase-like protein, PTPLA. A significant variation of PTPLA from other protein tyrosine phosphatases is the presence of proline instead of catalytic arginine at the active site. It is thought that PTPLA proteins have a role in the development, differentiation, and maintena…	K10703-ko00062 Fatty acid elongation;ko01040 Biosynthesis of unsaturated fatty acids;ko01212 Fatty acid metabolism	KOG3187, KOG3187, KOG3187, Protein tyrosine phosphatase-like protein PTPLA (contains Pro instead of catalytic Arg) [General function prediction only]. 9.22e-20	sp|O14346|HACD_SCHPO Probable very-long-chain (3R)-3-hydroxyacyl-CoA dehydratase OS=Schizosaccharomyces pombe (strain 972 / ATCC 24843) GN=SPBC19C2.15c PE=3 SV=2 5.75e-26	GO:0000038, very long-chain fatty acid metabolic process;GO:0000322, storage vacuole;GO:0000323, lytic vacuole;GO:0000324, fungal-type vacuole;GO:0000329, fungal-type vacuole membrane;GO:0003674, molecular_function;GO:0003824, catalytic activity;GO:0004300, enoyl-CoA hydratase activity;GO:0005575, cellular_component;GO:0005622, intracellular;GO:0005623, cell;GO:0005737, cytoplasm;GO:0005773, vacu…	CAB3399052.1 unnamed protein product [Caenorhabditis bovis] 8.99e-24	-
TRINITY_DN10893_c0_g1	9.91051	0.949783	3.38329	1.23632e-05	0.000562422	up	cd20305, cupin_OxDC_C, Oxalate decarboxylase (OxDC), C-terminal cupin domain. This model represents the C-terminal cupin domain of oxalate decarboxylase (OxDC; EC 4.1.1.2), a manganese-dependent bicupin that catalyzes the conversion of oxalate to formate and carbon dioxide, utilizing dioxygen as a cofactor. It is evolutionarily related to oxalate oxidase (OxOx or germin; EC 1.2.3.4) which, in con…	pfam00190, Cupin_1, Cupin. This family represents the conserved barrel domain of the 'cupin' superfamily ('cupa' is the Latin term for a small barrel). This family contains 11S and 7S plant seed storage proteins, and germins. Plant seed storage proteins provide the major nitrogen source for the developing plant. 1.67e-07	K01569-ko00630 Glyoxylate and dicarboxylate metabolism	-	sp|D4AKL6|OXDD_ARTBC Probable oxalate decarboxylase ARB_04859 OS=Arthroderma benhamiae (strain ATCC MYA-4681 / CBS 112371) GN=ARB_04859 PE=1 SV=1 4.23e-133	-	CAD7632178.1 unnamed protein product, partial [Medioppia subpectinata] >CAG2112608.1 unnamed protein product, partial [Medioppia subpectinata] 4.17e-39	-
TRINITY_DN10910_c0_g1	21.3127	228.387	-3.42169	1.02454e-09	2.00811e-07	down	-	-	-	-	-	-	-	-
TRINITY_DN10914_c0_g1	2.28496	9.89304	-2.11425	0.00118603	0.0193215	down	-	pfam13921, Myb_DNA-bind_6, Myb-like DNA-binding domain. This family contains the DNA binding domains from Myb proteins, as well as the SANT domain family. 7.31e-11	-	KOG0049, KOG0049, KOG0049, Transcription factor, Myb superfamily [Transcription]. 5.14e-09	sp|Q08759|MYB_XENLA Transcriptional activator Myb OS=Xenopus laevis GN=myb PE=2 SV=1 4.22e-08	-	XP_029503217.1 myb-related protein B-like [Oncorhynchus nerka] 3.01e-10	-
TRINITY_DN10916_c0_g1	0.0001	5.12846	-15.6462	1.92225e-11	6.88935e-09	down	cd11060, CYP57A1-like, cytochrome P450 family 57, subfamily A, polypeptide 1 and similar cytochrome P450s. This family is composed of fungal cytochrome P450s including: Nectria haematococca cytochrome P450 57A1 (CYP57A1), also called pisatin demethylase, which detoxifies the phytoalexin pisatin; Penicillium aethiopicum P450 monooxygenase gsfF, also called griseofulvin synthesis protein F, which c…	pfam00067, p450, Cytochrome P450. Cytochrome P450s are haem-thiolate proteins involved in the oxidative degradation of various compounds. They are particularly well known for their role in the degradation of environmental toxins and mutagens. They can be divided into 4 classes, according to the method by which electrons from NAD(P)H are delivered to the catalytic site. Sequence conservation is re…	-	KOG0684, KOG0684, KOG0684, Cytochrome P450 [Secondary metabolites biosynthesis, transport and catabolism]. 8.23e-14	sp|P38364|PID6_FUSSO Pisatin demethylase OS=Fusarium solani subsp. pisi GN=PDA6-1 PE=3 SV=1 2.10e-67	-	KAG4071074.1 hypothetical protein HA402_002746 [Bradysia odoriphaga] 4.59e-32	-
TRINITY_DN10932_c0_g1	148.698	32.2098	2.20681	4.86007e-05	0.00169244	up	-	-	-	-	-	-	-	-
TRINITY_DN10938_c0_g1	2.24992	10.823	-2.26616	6.31113e-05	0.00207243	down	-	-	-	-	-	-	-	-
TRINITY_DN10944_c0_g1	2.74951	6.81487	-1.30951	0.00189074	0.0276427	down	-	pfam01699, Na_Ca_ex, Sodium/calcium exchanger protein. This is a family of sodium/calcium exchanger integral membrane proteins. This family covers the integral membrane regions of the proteins. Sodium/calcium exchangers regulate intracellular Ca2+ concentrations in many cells; cardiac myocytes, epithelial cells, neurons retinal rod photoreceptors and smooth muscle cells. Ca2+ is moved into or out…	-	KOG1397, KOG1397, KOG1397, Ca2+/H+ antiporter VCX1 and related proteins [Inorganic ion transport and metabolism]. 9.78e-79	sp|O59768|VCX1_SCHPO Vacuolar calcium ion transporter OS=Schizosaccharomyces pombe (strain 972 / ATCC 24843) GN=vcx1 PE=3 SV=1 2.06e-105	GO:0000322, storage vacuole;GO:0000323, lytic vacuole;GO:0000324, fungal-type vacuole;GO:0000329, fungal-type vacuole membrane;GO:0003674, molecular_function;GO:0005215, transporter activity;GO:0005451, monovalent cation:proton antiporter activity;GO:0005575, cellular_component;GO:0005622, intracellular;GO:0005623, cell;GO:0005737, cytoplasm;GO:0005773, vacuole;GO:0005774, vacuolar membrane;GO:00…	KAJ3025124.1 hypothetical protein HDU68_007436 [Siphonaria sp. JEL0065] 7.47e-84	-
TRINITY_DN10951_c0_g1	1.41944	5.54071	-1.96475	0.00207656	0.0291369	down	-	pfam02661, Fic, Fic/DOC family. This family consists of the Fic (filamentation induced by cAMP) protein and doc (death on curing). The Fic protein is involved in cell division and is suggested to be involved in the synthesis of PAB or folate, indicating that the Fic protein and cAMP are involved in a regulatory mechanism of cell division via folate metabolism. This family contains a central conse…	-	KOG3824, KOG3824, KOG3824, Huntingtin interacting protein HYPE [General function prediction only]. 1.52e-06	sp|Q54RJ6|Y5363_DICDI Fido domain-containing protein DDB_G0283145 OS=Dictyostelium discoideum GN=DDB_G0283145 PE=3 SV=2 5.06e-11	-	XP_022901251.1 adenosine monophosphate-protein transferase FICD homolog [Onthophagus taurus] 1.82e-06	-
TRINITY_DN10955_c0_g1	339.821	1303.78	-1.93986	1.0921e-05	0.00050738	down	cd00377, ICL_PEPM, Members of the ICL/PEPM enzyme family catalyze either P-C or C-C bond formation/cleavage. Known members are phosphoenolpyruvate mutase (PEPM), phosphonopyruvate hydrolase (PPH), carboxyPEP mutase (CPEP mutase), oxaloacetate hydrolase (OAH), isocitrate lyase (ICL), and 2-methylisocitrate lyase (MICL). Isocitrate lyase (ICL) catalyzes the conversion of isocitrate to succinate and…	pfam00463, ICL, Isocitrate lyase family. 0.0	K01637-ko00630 Glyoxylate and dicarboxylate metabolism;ko01200 Carbon metabolism	KOG1260, KOG1260, KOG1260, Isocitrate lyase [Energy production and conversion]. 3.05e-99	sp|P0CT06|ACEA_MAGO7 Isocitrate lyase OS=Magnaporthe oryzae (strain 70-15 / ATCC MYA-4617 / FGSC 8958) GN=ICL1 PE=1 SV=1 0.0	GO:0003674, molecular_function;GO:0003824, catalytic activity;GO:0004451, isocitrate lyase activity;GO:0005575, cellular_component;GO:0005622, intracellular;GO:0005623, cell;GO:0005737, cytoplasm;GO:0005777, peroxisome;GO:0005782, peroxisomal matrix;GO:0005975, carbohydrate metabolic process;GO:0006081, cellular aldehyde metabolic process;GO:0006082, organic acid metabolic process;GO:0006083, ace…	NP_001135720.1 uncharacterized protein LOC100216301 [Xenopus tropicalis] >AAI69173.1 Unknown (protein for MGC:189660) [Xenopus tropicalis] >KAF2215923.1 hypothetical protein CERZMDRAFT_35222 [Cercospora zeae-maydis SCOH1-5] 6.60e-235	-
TRINITY_DN10958_c0_g1	2.98069	0.23487	3.66571	0.000360019	0.00794564	up	cd03431, DNA_Glycosylase_C, DNA glycosylase (MutY in bacteria and hMYH in humans) is responsible for repairing misread A*oxoG residues to C*G by removing the inappropriately paired adenine base from the DNA backbone. It belongs to the Nudix hydrolase superfamily and is important for the repair of various genotoxic lesions. Enzymes belonging to this superfamily requires a divalent cation, such as …	pfam14815, NUDIX_4, NUDIX domain. 4.99e-12	K03575-ko03410 Base excision repair	KOG2457, KOG2457, KOG2457, A/G-specific adenine DNA glycosylase [Replication, recombination and repair]. 1.64e-48	sp|Q8R5G2|MUTYH_RAT Adenine DNA glycosylase OS=Rattus norvegicus GN=Mutyh PE=2 SV=1 2.70e-09	GO:0000075, cell cycle checkpoint;GO:0000077, DNA damage checkpoint;GO:0000700, mismatch base pair DNA N-glycosylase activity;GO:0000701, purine-specific mismatch base pair DNA N-glycosylase activity;GO:0000702, oxidized base lesion DNA N-glycosylase activity;GO:0003674, molecular_function;GO:0003676, nucleic acid binding;GO:0003677, DNA binding;GO:0003684, damaged DNA binding;GO:0003690, double-…	XP_039301380.1 LOW QUALITY PROTEIN: adenine DNA glycosylase-like [Nilaparvata lugens] 1.03e-159	-
TRINITY_DN10975_c0_g1	3.07037	12.5934	-2.03618	6.58289e-05	0.00213225	down	cd11061, CYP67-like, cytochrome P450 family 67 and similar cytochrome P450s. This subfamily includes Uromyces viciae-fabae cytochrome P450 67 (CYP67), also called planta-induced rust protein 16, Cystobasidium minutum (Rhodotorula minuta) cytochrome P450rm, and other fungal cytochrome P450s. P450rm catalyzes the formation of isobutene and 4-hydroxylation of benzoate. The gene encoding CYP67 is a p…	pfam10282, Lactonase, Lactonase, 7-bladed beta-propeller. This entry contains bacterial 6-phosphogluconolactonases (6PGL)YbhE-type (EC:3.1.1.31) which hydrolyze 6-phosphogluconolactone to 6-phosphogluconate. The entry also contains the fungal muconate lactonising enzyme carboxy-cis,cis-muconate cyclase (EC:5.5.1.5) and muconate cycloisomerase (EC:5.5.1.1), which convert cis,cis-muconates to mucon…	-	KOG0158, KOG0158, KOG0158, Cytochrome P450 CYP3/CYP5/CYP6/CYP9 subfamilies [Secondary metabolites biosynthesis, transport and catabolism]. 1.17e-26	sp|E9FCP5|DTXS2_METRA Cytochrome P450 monooxygenase dtxS2 OS=Metarhizium robertsii (strain ARSEF 23 / ATCC MYA-3075) GN=dtxS2 PE=3 SV=2 2.90e-32	-	XP_053203010.1 cytochrome P450 3A8-like [Panonychus citri] >XP_053205623.1 cytochrome P450 3A8-like [Panonychus citri] 3.46e-24	-
TRINITY_DN10984_c0_g1	10.0158	1.45546	2.78273	0.000342185	0.00770624	up	-	pfam00264, Tyrosinase, Common central domain of tyrosinase. This family also contains polyphenol oxidases and some hemocyanins. Binds two copper ions via two sets of three histidines. This family is related to pfam00372. 8.93e-29	K00505-ko00350 Tyrosine metabolism;ko00740 Riboflavin metabolism;ko00950 Isoquinoline alkaloid biosynthesis;ko00965 Betalain biosynthesis;ko04916 Melanogenesis	-	sp|O61363|HCYG_ENTDO Hemocyanin G-type, units Oda to Odg OS=Enteroctopus dofleini GN=ODHCY PE=1 SV=1 9.72e-08	-	XP_015793856.1 uncharacterized protein LOC107370381 [Tetranychus urticae] 4.12e-22	-
TRINITY_DN10991_c0_g1	6.25464	13.237	-1.08157	0.00395872	0.0445765	down	cd05373, SDR_c10, classical (c) SDR, subgroup 10. This subgroup resembles the classical SDRs, but has an incomplete match to the canonical glycine rich NAD-binding motif and lacks the typical active site tetrad (instead of the critical active site Tyr, it has Phe, but contains the nearby Lys). SDRs are a functionally diverse family of oxidoreductases that have a single domain with a structurally …	-	-	-	-	-	CAF0939487.1 unnamed protein product [Adineta steineri] >CAF3582142.1 unnamed protein product [Adineta steineri] 2.50e-27	-
TRINITY_DN10992_c0_g1	8.48244	1.64008	2.37071	0.00357318	0.0419387	up	-	pfam05199, GMC_oxred_C, GMC oxidoreductase. This domain found associated with pfam00732. 3.89e-10	-	KOG1238, KOG1238, KOG1238, Glucose dehydrogenase/choline dehydrogenase/mandelonitrile lyase (GMC oxidoreductase family) [General function prediction only]. 1.27e-45	sp|Q6LGH5|BETA_PHOPR Oxygen-dependent choline dehydrogenase OS=Photobacterium profundum (strain SS9) GN=betA PE=3 SV=1 7.15e-50	-	XP_014284527.1 uncharacterized protein LOC106685981 isoform X2 [Halyomorpha halys] 4.13e-47	-
TRINITY_DN10994_c0_g1	1.76035	5.1097	-1.53738	0.00431369	0.047022	down	-	-	-	-	-	-	-	-
TRINITY_DN10997_c0_g1	6.43041	24.5622	-1.93345	5.01738e-06	0.000276044	down	-	pfam07876, Dabb, Stress responsive A/B Barrel Domain. The function of this family is unknown, but it is upregulated in response to salt stress in Populus balsamifera. It is also found at the C-terminus of an fructose 1,6-bisphosphate aldolase from Hydrogenophilus thermoluteolus. Arthrobacter nicotinovorans ORF106 is found in the pA01 plasmid, which encodes genes for molybdopterin uptake and degra…	-	-	-	-	CAF0764149.1 unnamed protein product [Adineta steineri] >CAF0844206.1 unnamed protein product [Adineta steineri] >CAF0881610.1 unnamed protein product [Adineta steineri] >CAF1032248.1 unnamed protein product [Adineta steineri] >CAF3513461.1 unnamed protein product [Adineta steineri] 5.31e-07	-
TRINITY_DN10998_c0_g2	13.6244	1.79092	2.92742	2.75643e-05	0.00105417	up	-	-	-	-	-	-	-	-
TRINITY_DN11015_c0_g1	0.498322	12.9714	-4.70211	2.28327e-08	2.86414e-06	down	-	pfam07110, EthD, EthD domain. This family consists of several bacterial sequences which are related to the EthD protein of Rhodococcus ruber. In Rhodococcus ruber, EthD is thought to be involved in the degradation of ethyl tert-butyl ether (ETBE). EthD synthesis is induced by ETBE but it's exact function is unknown, it is however thought to be essential to the ETBE degradation system. 2.01e-07	-	-	sp|B8NI03|HYPC_ASPFN Noranthrone monooxygenase OS=Aspergillus flavus (strain ATCC 200026 / FGSC A1120 / NRRL 3357 / JCM 12722 / SRRC 167) GN=hypC PE=1 SV=1 8.14e-19	GO:0008150, biological_process;GO:0008152, metabolic process;GO:0009058, biosynthetic process;GO:0019748, secondary metabolic process;GO:0044550, secondary metabolite biosynthetic process	-	-
TRINITY_DN11022_c0_g1	3.81989	0.550534	2.79463	0.000388011	0.0083629	up	-	-	-	-	-	-	-	-
TRINITY_DN11046_c0_g1	87.2736	321.441	-1.88094	3.48063e-08	4.1582e-06	down	cd05353, hydroxyacyl-CoA-like_DH_SDR_c-like, (3R)-hydroxyacyl-CoA dehydrogenase-like, classical(c)-like SDRs. Beta oxidation of fatty acids in eukaryotes occurs by a four-reaction cycle, that may take place in mitochondria or in peroxisomes. (3R)-hydroxyacyl-CoA dehydrogenase is part of rat peroxisomal multifunctional MFE-2, it is a member of the NAD-dependent SDRs, but contains an additional sma…	pfam00106, adh_short, short chain dehydrogenase. This family contains a wide variety of dehydrogenases. 6.66e-23	-	KOG1206, KOG1206, KOG1206, Peroxisomal multifunctional beta-oxidation protein and related enzymes [Lipid transport and metabolism]. 6.45e-74	sp|Q01373|FOX2_NEUCR Peroxisomal hydratase-dehydrogenase-epimerase OS=Neurospora crassa (strain ATCC 24698 / 74-OR23-1A / CBS 708.71 / DSM 1257 / FGSC 987) GN=fox-2 PE=1 SV=1 9.36e-10	-	KAJ3026460.1 hypothetical protein HDU68_005635 [Siphonaria sp. JEL0065] 1.10e-295	-
TRINITY_DN11054_c0_g1	10.028	59.2393	-2.56252	0.000212313	0.00536947	down	-	-	-	-	-	-	-	-
TRINITY_DN11072_c0_g1	11.5434	1.89783	2.60465	0.000749365	0.0135599	up	cd17502, MFS_Azr1_MDR_like, Saccharomyces cerevisiae Azole resistance protein 1 (Azr1p), and similar multidrug resistance (MDR) transporters of the Major Facilitator Superfamily. This subfamily is composed of multidrug resistance (MDR) transporters including various Saccharomyces cerevisiae proteins such as azole resistance protein 1 (Azr1p), vacuolar basic amino acid transporter 1 (Vba1p), vacuo…	-	-	-	sp|B6HJU0|ROQT_PENRW Efflux pump roqT OS=Penicillium rubens (strain ATCC 28089 / DSM 1075 / NRRL 1951 / Wisconsin 54-1255) GN=roqT PE=1 SV=1 2.35e-93	-	KAJ3010587.1 hypothetical protein HDU68_002075 [Siphonaria sp. JEL0065] 1.64e-29	-
TRINITY_DN11080_c0_g1	498.798	88.0731	2.50168	6.96261e-07	5.22988e-05	up	cd06186, NOX_Duox_like_FAD_NADP, NADPH oxidase (NOX) catalyzes the generation of reactive oxygen species (ROS) such as superoxide and hydrogen peroxide. ROS were originally identified as bactericidal agents in phagocytes, but are now also implicated in cell signaling and metabolism. NOX has a 6-alpha helix heme-binding transmembrane domain fused to a flavoprotein with the nucleotide binding domai…	-	-	-	sp|Q12333|FRE7_YEAST Ferric/cupric reductase transmembrane component 7 OS=Saccharomyces cerevisiae (strain ATCC 204508 / S288c) GN=FRE7 PE=1 SV=2 1.13e-11	-	-	-
TRINITY_DN11088_c0_g1	80.8929	20.9422	1.9496	0.00138488	0.0219066	up	cd11058, CYP60B-like, cytochrome P450 family 60, subfamily B and similar cytochrome P450s. This family is composed of fungal cytochrome P450s including: Aspergillus nidulans cytochrome P450 60B (CYP60B), also called versicolorin B desaturase, which catalyzes the conversion of versicolorin B to versicolorin A during sterigmatocystin biosynthesis; Fusarium sporotrichioides cytochrome P450 65A1 (CYP…	pfam00067, p450, Cytochrome P450. Cytochrome P450s are haem-thiolate proteins involved in the oxidative degradation of various compounds. They are particularly well known for their role in the degradation of environmental toxins and mutagens. They can be divided into 4 classes, according to the method by which electrons from NAD(P)H are delivered to the catalytic site. Sequence conservation is re…	-	KOG0158, KOG0158, KOG0158, Cytochrome P450 CYP3/CYP5/CYP6/CYP9 subfamilies [Secondary metabolites biosynthesis, transport and catabolism]. 1.95e-23	sp|O13317|TRI11_FUSSP Isotrichodermin C-15 hydroxylase OS=Fusarium sporotrichioides GN=TRI11 PE=3 SV=1 9.09e-68	-	XP_021009990.1 cytochrome P450 3A16 [Mus caroli] 9.41e-25	-
TRINITY_DN11094_c0_g1	0.663107	4.9411	-2.89752	0.000317274	0.00725953	down	cd05251, NmrA_like_SDR_a, NmrA (a transcriptional regulator) and HSCARG (an NADPH sensor) like proteins, atypical (a) SDRs. NmrA and HSCARG like proteins. NmrA is a negative transcriptional regulator of various fungi, involved in the post-translational modulation of the GATA-type transcription factor AreA. NmrA lacks the canonical GXXGXXG NAD-binding motif and has altered residues at the catalyti…	pfam05368, NmrA, NmrA-like family. NmrA is a negative transcriptional regulator involved in the post-translational modification of the transcription factor AreA. NmrA is part of a system controlling nitrogen metabolite repression in fungi. This family only contains a few sequences as iteration results in significant matches to other Rossmann fold families. 8.73e-10	-	-	sp|Q5ZID0|NMRL1_CHICK NmrA-like family domain-containing protein 1 OS=Gallus gallus GN=NMRAL1 PE=2 SV=1 1.46e-21	-	XP_002732736.1 PREDICTED: nmrA-like family domain-containing protein 1-like [Saccoglossus kowalevskii] 1.03e-13	-
TRINITY_DN11095_c0_g1	53.4444	154.149	-1.52821	0.000532872	0.0107121	down	cd03190, GST_C_Omega_like, C-terminal, alpha helical domain of Class Omega-like Glutathione S-transferases. Glutathione S-transferase (GST) C-terminal domain family, Saccharomyces cerevisiae Omega-like subfamily; composed of three Saccharomyces cerevisiae GST omega-like (Gto) proteins, Gto1p, Gto2p (also known as Extracellular mutant protein 4 or ECM4p), and Gto3p, as well as similar uncharacteri…	pfam09351, DUF1993, Domain of unknown function (DUF1993). This family of proteins are functionally uncharacterized. 8.08e-28	-	KOG2903, KOG2903, KOG2903, Predicted glutathione S-transferase [Posttranslational modification, protein turnover, chaperones]. 1.79e-74	sp|O94524|GTO2_SCHPO Glutathione S-transferase omega-like 2 OS=Schizosaccharomyces pombe (strain 972 / ATCC 24843) GN=gto2 PE=3 SV=1 6.65e-78	-	CAC5393228.1 unnamed protein product [Mytilus coruscus] >CAC5393229.1 ECM4 [Mytilus coruscus] >CAC5393230.1 unnamed protein product [Mytilus coruscus] 1.11e-67	-
TRINITY_DN11107_c0_g1	13.1	59.5743	-2.18512	7.09643e-08	7.74066e-06	down	cd11066, CYP_PhacA-like, fungal cytochrome P450s similar to Aspergillus nidulans phenylacetate 2-hydroxylase. This group includes Aspergillus nidulans phenylacetate 2-hydroxylase (encoded by the phacA gene) and similar fungal cytochrome P450s. PhacA catalyzes the ortho-hydroxylation of phenylacetate, the first step of A. nidulans phenylacetate catabolism. The PhacA-like subfamily belongs to the l…	pfam00067, p450, Cytochrome P450. Cytochrome P450s are haem-thiolate proteins involved in the oxidative degradation of various compounds. They are particularly well known for their role in the degradation of environmental toxins and mutagens. They can be divided into 4 classes, according to the method by which electrons from NAD(P)H are delivered to the catalytic site. Sequence conservation is re…	K10437-ko00643 Styrene degradation;ko00360 Phenylalanine metabolism	KOG0156, KOG0156, KOG0156, Cytochrome P450 CYP2 subfamily [Secondary metabolites biosynthesis, transport and catabolism]. 8.81e-06	sp|Q9Y7G5|PHACA_EMEND Phenylacetate 2-hydroxylase OS=Emericella nidulans GN=phacA PE=1 SV=1 5.04e-124	-	CAF3390062.1 unnamed protein product [Rotaria sp. Silwood1] >CAF4634257.1 unnamed protein product [Rotaria sp. Silwood1] >CAF4874704.1 unnamed protein product [Rotaria sp. Silwood1] 9.17e-120	-
TRINITY_DN11113_c0_g1	18.6422	4.34424	2.1014	0.000654522	0.0123836	up	-	-	-	KOG1227, KOG1227, KOG1227, Putative methyltransferase [General function prediction only]. 2.44e-29	sp|Q09832|TYW2_SCHPO tRNA wybutosine-synthesizing protein 2 OS=Schizosaccharomyces pombe (strain 972 / ATCC 24843) GN=trm12 PE=3 SV=1 1.05e-63	GO:0001510, RNA methylation;GO:0003674, molecular_function;GO:0003824, catalytic activity;GO:0005575, cellular_component;GO:0005622, intracellular;GO:0005623, cell;GO:0005737, cytoplasm;GO:0006139, nucleobase-containing compound metabolic process;GO:0006396, RNA processing;GO:0006399, tRNA metabolic process;GO:0006400, tRNA modification;GO:0006725, cellular aromatic compound metabolic process;GO:…	ODN03629.1 tRNA wybutosine-synthesizing protein 2 [Orchesella cincta] 4.34e-15	-
TRINITY_DN11117_c0_g1	4.5825	13.6812	-1.57799	0.000631008	0.0121591	down	-	-	-	-	-	-	-	-
TRINITY_DN11122_c0_g1	459.364	1242.07	-1.43504	0.00017806	0.00469241	down	cd04824, eu_ALAD_PBGS_cysteine_rich, Porphobilinogen synthase (PBGS), which is also called delta-aminolevulinic acid dehydratase (ALAD), catalyzes the condensation of two 5-aminolevulinic acid (ALA) molecules to form the pyrrole porphobilinogen (PBG), which is the second step in the biosynthesis of tetrapyrroles, such as heme, vitamin B12 and chlorophyll. This reaction involves the formation of a…	pfam00490, ALAD, Delta-aminolevulinic acid dehydratase. 2.01e-94	K01698-ko00860 Porphyrin and chlorophyll metabolism	KOG2794, KOG2794, KOG2794, Delta-aminolevulinic acid dehydratase [Coenzyme transport and metabolism]. 3.15e-115	sp|O42768|HEM2_CANGA Delta-aminolevulinic acid dehydratase OS=Candida glabrata (strain ATCC 2001 / CBS 138 / JCM 3761 / NBRC 0622 / NRRL Y-65) GN=HEM2 PE=3 SV=1 2.21e-151	GO:0003674, molecular_function;GO:0003824, catalytic activity;GO:0004655, porphobilinogen synthase activity;GO:0005488, binding;GO:0005575, cellular_component;GO:0005622, intracellular;GO:0005623, cell;GO:0005634, nucleus;GO:0005737, cytoplasm;GO:0005829, cytosol;GO:0006725, cellular aromatic compound metabolic process;GO:0006778, porphyrin-containing compound metabolic process;GO:0006779, porphy…	XP_053328449.1 delta-aminolevulinic acid dehydratase [Spea bombifrons] 6.52e-117	-
TRINITY_DN11135_c0_g2	0.0001	2.20362	-14.4276	1.06881e-07	1.07842e-05	down	-	-	-	-	-	-	-	-
TRINITY_DN11147_c0_g1	0.109203	3.47101	-4.99027	5.2801e-06	0.00028923	down	-	-	-	-	-	-	-	-
TRINITY_DN11151_c0_g1	0.245708	2.24778	-3.19348	0.000183986	0.0047783	down	cd12118, ttLC_FACS_AEE21_like, Fatty acyl-CoA synthetases similar to LC-FACS from Thermus thermophiles and Arabidopsis. This family includes fatty acyl-CoA synthetases that can activate medium to long-chain fatty acids. These enzymes catalyze the ATP-dependent acylation of fatty acids in a two-step reaction. The carboxylate substrate first reacts with ATP to form an acyl-adenylate intermediate, w…	pfam00501, AMP-binding, AMP-binding enzyme. 3.81e-14	-	KOG1176, KOG1176, KOG1176, Acyl-CoA synthetase [Lipid transport and metabolism]. 1.76e-50	sp|Q8VZF1|AEE7_ARATH Acetate/butyrate--CoA ligase AAE7, peroxisomal OS=Arabidopsis thaliana GN=AAE7 PE=1 SV=1 7.47e-97	-	KAJ3022291.1 hypothetical protein HDU68_009223 [Siphonaria sp. JEL0065] 5.22e-99	-
TRINITY_DN11152_c0_g1	140.595	37.4193	1.90969	0.00081292	0.0144233	up	cd11307, M35_Asp_f2_like, Peptidase M35 domain of Asp f2, a major allergen from Aspergillus fumigatus, and related proteins; non catalytic. In this domain subgroup the unique zinc-binding motif (the aspzincin motif, characteristic of the M35 deuterolysin family, and defined as the "HEXXH + D" motif: two His ligands and Asp as third ligand), is poorly conserved and may not bind Zinc. Members of th…	pfam13933, HRXXH, Putative peptidase family. This family of putative peptidases are closely related to the M35 family pfam02102. In this family the metal binding HEXXH motif is replaced with HRXXH. The exact function of these proteins is unknown. Members of this family are found to be fungal allergens. 1.84e-68	K07204-ko04151 PI3K-Akt signaling pathway;ko04211 Longevity regulating pathway - mammal;ko04150 mTOR signaling pathway;ko04213 Longevity regulating pathway - multiple species;ko04152 AMPK signaling pathway;ko04910 Insulin signaling pathway	KOG1517, KOG1517, KOG1517, Guanine nucleotide binding protein MIP1 [Cell cycle control, cell division, chromosome partitioning]. 0.0	sp|P87141|MIP1_SCHPO Target of rapamycin complex 1 subunit mip1 OS=Schizosaccharomyces pombe (strain 972 / ATCC 24843) GN=mip1 PE=1 SV=1 0.0	GO:0000322, storage vacuole;GO:0000323, lytic vacuole;GO:0000324, fungal-type vacuole;GO:0000329, fungal-type vacuole membrane;GO:0001101, response to acid chemical;GO:0001558, regulation of cell growth;GO:0001932, regulation of protein phosphorylation;GO:0001934, positive regulation of protein phosphorylation;GO:0003674, molecular_function;GO:0005488, binding;GO:0005515, protein binding;GO:00055…	CAH1793909.1 unnamed protein product [Owenia fusiformis] 0.0	-
TRINITY_DN11176_c0_g1	0.783698	2.23425	-1.51142	0.00353665	0.0417063	down	cd05235, SDR_e1, extended (e) SDRs, subgroup 1. This family consists of an SDR module of multidomain proteins identified as putative polyketide sythases fatty acid synthases (FAS), and nonribosomal peptide synthases, among others. However, unlike the usual ketoreductase modules of FAS and polyketide synthase, these domains are related to the extended SDRs, and have canonical NAD(P)-binding motifs…	pfam07993, NAD_binding_4, Male sterility protein. This family represents the C-terminal region of the male sterility protein in a number of arabidopsis and drosophila. A sequence-related jojoba acyl CoA reductase is also included. 1.33e-12	-	KOG1221, KOG1221, KOG1221, Acyl-CoA reductase [Lipid transport and metabolism]. 5.31e-07	sp|Q5BEJ6|AFOE_EMENI Iterative polyketide synthase afoE OS=Emericella nidulans (strain FGSC A4 / ATCC 38163 / CBS 112.46 / NRRL 194 / M139) GN=afoE PE=1 SV=1 1.65e-21	-	CAF3848046.1 unnamed protein product [Adineta steineri] 5.50e-56	-
TRINITY_DN11196_c0_g1	9.25669	0.814739	3.50609	8.39052e-06	0.000414373	up	-	-	-	-	sp|G3Y423|YANE_ASPNA Yanuthone D synthesis protein E OS=Aspergillus niger (strain ATCC 1015 / CBS 113.46 / FGSC A1144 / LSHB Ac4 / NCTC 3858a / NRRL 328 / USDA 3528.7) GN=yanE PE=1 SV=2 1.59e-54	-	-	-
TRINITY_DN11200_c0_g1	39.933	124.353	-1.63879	0.00294689	0.0368553	down	-	-	-	-	-	-	-	-
TRINITY_DN11201_c0_g1	13.8248	39.2603	-1.50581	0.00213236	0.0297758	down	-	-	-	-	-	-	-	-
TRINITY_DN11202_c0_g1	5.36866	29.0109	-2.43396	8.89391e-07	6.47118e-05	down	-	-	-	-	sp|P25145|Y432_LISMO Uncharacterized oxidoreductase Lmo0432 OS=Listeria monocytogenes serovar 1/2a (strain ATCC BAA-679 / EGD-e) GN=lmo0432 PE=3 SV=2 5.48e-06	-	CAF1347282.1 unnamed protein product [Rotaria magnacalcarata] >CAF1970566.1 unnamed protein product [Rotaria magnacalcarata] >CAF2087541.1 unnamed protein product [Rotaria magnacalcarata] 2.99e-08	-
TRINITY_DN11205_c0_g1	24.6901	5.13102	2.26661	0.000364477	0.00799462	up	-	pfam11374, DUF3176, Protein of unknown function (DUF3176). This eukaryotic family of proteins has no known function. 3.17e-14	-	-	-	-	-	-
TRINITY_DN11206_c0_g1	0.07145	7.39012	-6.69252	1.98188e-10	4.87464e-08	down	cd00377, ICL_PEPM, Members of the ICL/PEPM enzyme family catalyze either P-C or C-C bond formation/cleavage. Known members are phosphoenolpyruvate mutase (PEPM), phosphonopyruvate hydrolase (PPH), carboxyPEP mutase (CPEP mutase), oxaloacetate hydrolase (OAH), isocitrate lyase (ICL), and 2-methylisocitrate lyase (MICL). Isocitrate lyase (ICL) catalyzes the conversion of isocitrate to succinate and…	pfam00463, ICL, Isocitrate lyase family. 1.39e-85	K01637-ko00630 Glyoxylate and dicarboxylate metabolism;ko01200 Carbon metabolism	KOG1260, KOG1260, KOG1260, Isocitrate lyase [Energy production and conversion]. 3.68e-81	sp|Q9P6J1|ACEB_SCHPO Mitochondrial 2-methylisocitrate lyase OS=Schizosaccharomyces pombe (strain 972 / ATCC 24843) GN=icl2 PE=3 SV=1 4.97e-17	-	NP_001135720.1 uncharacterized protein LOC100216301 [Xenopus tropicalis] >AAI69173.1 Unknown (protein for MGC:189660) [Xenopus tropicalis] >KAF2215923.1 hypothetical protein CERZMDRAFT_35222 [Cercospora zeae-maydis SCOH1-5] 1.97e-78	-
TRINITY_DN11207_c0_g1	84.7392	24.801	1.77263	0.000715664	0.0131439	up	-	pfam02144, Rad1, Repair protein Rad1/Rec1/Rad17. 3.61e-44	K02830-ko04111 Cell cycle - yeast;ko04113 Meiosis - yeast	KOG3194, KOG3194, KOG3194, Checkpoint 9-1-1 complex, RAD1 component [Energy production and conversion, Replication, recombination and repair]. 1.46e-24	sp|P22193|RAD1_SCHPO DNA damage checkpoint control protein rad1 OS=Schizosaccharomyces pombe (strain 972 / ATCC 24843) GN=rad1 PE=1 SV=2 3.16e-27	GO:0000075, cell cycle checkpoint;GO:0000076, DNA replication checkpoint;GO:0000077, DNA damage checkpoint;GO:0000228, nuclear chromosome;GO:0000278, mitotic cell cycle;GO:0000723, telomere maintenance;GO:0000785, chromatin;GO:0000792, heterochromatin;GO:0000793, condensed chromosome;GO:0000794, condensed nuclear chromosome;GO:0003674, molecular_function;GO:0003676, nucleic acid binding;GO:000367…	XP_038131010.1 cell cycle checkpoint protein RAD1 [Cyprinodon tularosa] 1.79e-34	-
TRINITY_DN11231_c0_g1	22.4559	55.482	-1.30492	0.00094021	0.0161341	down	cd03141, GATase1_Hsp31_like, Type 1 glutamine amidotransferase (GATase1)-like domain found in proteins similar to Escherichia coli Hsp31 protein. Type 1 glutamine amidotransferase (GATase1)-like domain found in proteins similar to Escherichia coli Hsp31 protein (EcHsp31). This group includes EcHsp31 and Saccharomyces cerevisiae Ydr533c protein. EcHsp31 has chaperone activity. Ydr533c is upregulat…	-	-	-	sp|Q5AF03|HSP31_CANAL Glyoxalase 3 OS=Candida albicans (strain SC5314 / ATCC MYA-2876) GN=GLX3 PE=1 SV=1 1.82e-14	-	UJR34909.1 hypothetical protein I4U23_027687 [Adineta vaga] 8.64e-49	-
TRINITY_DN11247_c0_g1	7.09074	0.61403	3.52956	0.00414898	0.0459392	up	-	pfam03501, S10_plectin, Plectin/S10 domain. This presumed domain is found at the N-terminus of some isoforms of the cytoskeletal muscle protein plectin as well as the ribosomal S10 protein. This domain may be involved in RNA binding. 3.49e-53	K02947-ko03010 Ribosome	KOG3344, KOG3344, KOG3344, 40s ribosomal protein s10 [Translation, ribosomal structure and biogenesis]. 3.93e-76	sp|P46783|RS10_HUMAN 40S ribosomal protein S10 OS=Homo sapiens GN=RPS10 PE=1 SV=1 4.87e-107	GO:0000028, ribosomal small subunit assembly;GO:0000049, tRNA binding;GO:0003674, molecular_function;GO:0003676, nucleic acid binding;GO:0003723, RNA binding;GO:0003735, structural constituent of ribosome;GO:0005198, structural molecule activity;GO:0005488, binding;GO:0005515, protein binding;GO:0005575, cellular_component;GO:0005622, intracellular;GO:0005623, cell;GO:0005634, nucleus;GO:0005730,…	XP_003828447.2 40S ribosomal protein S10 [Pan paniscus] 5.74e-121	PREDICTED: Pan paniscus ribosomal protein S10 (RPS10), transcript variant X1, mRNA 0.0
TRINITY_DN11263_c0_g1	0.47794	2.14213	-2.16414	0.000352806	0.00784528	down	-	pfam06985, HET, Heterokaryon incompatibility protein (HET). This family represents a conserved region approximately 150 residues long within various heterokaryon incompatibility proteins that seem to be restricted to ascomycete fungi. Genetic differences in specific het genes prevent a viable heterokaryotic fungal cell from being formed by the fusion of filaments from two different wild-type stra…	-	-	-	-	KAI1693513.1 heterokaryon incompatibility protein (HET) domain-containing protein [Ditylenchus destructor] 1.16e-32	-
TRINITY_DN11280_c0_g1	0.357152	3.74247	-3.38938	0.000512084	0.0104619	down	cd17323, MFS_Tpo1_MDR_like, Yeast Polyamine transporter 1 (Tpo1) and similar multidrug resistance (MDR) transporters of the Major Facilitator Superfamily. This family is composed of fungal multidrug resistance (MDR) transporters including several proteins from Saccharomyces cerevisiae such as polyamine transporters 1-4 (Tpo1-4), quinidine resistance proteins 1-3 (Qdr1-3), dityrosine transporter 1…	-	-	KOG0255, KOG0255, KOG0255, Synaptic vesicle transporter SVOP and related transporters (major facilitator superfamily) [General function prediction only]. 1.73e-06	sp|O94528|CAF5_SCHPO Caffeine resistance protein 5 OS=Schizosaccharomyces pombe (strain 972 / ATCC 24843) GN=caf5 PE=3 SV=1 1.88e-29	GO:0000296, spermine transport;GO:0000297, spermine transmembrane transporter activity;GO:0003674, molecular_function;GO:0005215, transporter activity;GO:0005575, cellular_component;GO:0005622, intracellular;GO:0005623, cell;GO:0005634, nucleus;GO:0005737, cytoplasm;GO:0005886, plasma membrane;GO:0005887, integral component of plasma membrane;GO:0006810, transport;GO:0006811, ion transport;GO:000…	UJR19438.1 hypothetical protein I4U23_022568 [Adineta vaga] 6.19e-49	-
TRINITY_DN11287_c0_g1	1.24252	5.77176	-2.21574	0.00273819	0.035066	down	-	-	-	-	-	-	-	-
TRINITY_DN11292_c0_g4	0.822512	2.53628	-1.6246	0.001296	0.0208424	down	cd17327, MFS_FEN2_like, Pantothenate transporter FEN2 and similar transporters of the Major Facilitator Superfamily. This family is composed of Saccharomyces cerevisiae pantothenate transporter FEN2 (or fenpropimorph resistance protein 2) and similar proteins from fungi and bacteria including fungal vitamin H transporter, allantoate permease, and high-affinity nicotinic acid transporter, as well …	-	-	KOG2533, KOG2533, KOG2533, Permease of the major facilitator superfamily [Carbohydrate transport and metabolism]. 3.54e-55	sp|O94491|YC7A_SCHPO Uncharacterized transporter C417.10 OS=Schizosaccharomyces pombe (strain 972 / ATCC 24843) GN=SPCC417.10 PE=3 SV=1 1.64e-98	-	CAF1325633.1 unnamed protein product [Didymodactylos carnosus] >CAF4175119.1 unnamed protein product [Didymodactylos carnosus] 3.28e-25	-
TRINITY_DN11305_c0_g1	0.750151	2.42551	-1.69303	0.000304955	0.00704486	down	cd00833, PKS, polyketide synthases (PKSs) polymerize simple fatty acids into a large variety of different products, called polyketides, by successive decarboxylating Claisen condensations. PKSs can be divided into 2 groups, modular type I PKSs consisting of one or more large multifunctional proteins and iterative type II PKSs, complexes of several monofunctional subunits. 9.56e-112	pfam00109, ketoacyl-synt, Beta-ketoacyl synthase, N-terminal domain. The structure of beta-ketoacyl synthase is similar to that of the thiolase family (pfam00108) and also chalcone synthase. The active site of beta-ketoacyl synthase is located between the N and C-terminal domains. The N-terminal domain contains most of the structures involved in dimer formation and also the active site cysteine. …	-	KOG1202, KOG1202, KOG1202, Animal-type fatty acid synthase and related proteins [Lipid transport and metabolism]. 7.45e-59	sp|Q8J0F5|MLCB_PENCI Compactin diketide synthase mokB OS=Penicillium citrinum GN=mlcB PE=1 SV=1 1.63e-120	-	MCL4114250.1 hypothetical protein [Idotea baltica] 1.65e-194	-
TRINITY_DN11312_c0_g1	0.261818	1.35987	-2.37683	8.26041e-05	0.00253346	down	cd11069, CYP_FUM15-like, Fusarium verticillioides cytochrome P450 monooxygenase FUM15, and similar cytochrome P450s. Fusarium verticillioides cytochrome P450 monooxygenase FUM15, is also called fumonisin biosynthesis cluster protein 15. The FUM15 gene is part of the gene cluster that mediates the biosynthesis of fumonisins B1, B2, B3, and B4, which are carcinogenic mycotoxins. This FUM15-like sub…	pfam00067, p450, Cytochrome P450. Cytochrome P450s are haem-thiolate proteins involved in the oxidative degradation of various compounds. They are particularly well known for their role in the degradation of environmental toxins and mutagens. They can be divided into 4 classes, according to the method by which electrons from NAD(P)H are delivered to the catalytic site. Sequence conservation is re…	-	KOG0157, KOG0157, KOG0157, Cytochrome P450 CYP4/CYP19/CYP26 subfamilies [Secondary metabolites biosynthesis, transport and catabolism, Lipid transport and metabolism]. 2.15e-35	sp|P79152|CP3AJ_CAPHE Cytochrome P450 3A19 (Fragment) OS=Capra hircus aegagrus GN=CYP3A19 PE=2 SV=1 3.04e-27	-	RDD45725.1 Cytochrome P450 4B1 [Trichoplax sp. H2] 7.88e-40	-
TRINITY_DN11314_c1_g1	13.2281	37.6093	-1.50748	0.00352882	0.0417063	down	-	-	-	-	sp|Q00808|HETE1_PODAS Vegetative incompatibility protein HET-E-1 OS=Podospora anserina GN=HET-E1 PE=3 SV=1 2.81e-06	-	-	-
TRINITY_DN1132_c0_g1	1.46757	12.8056	-3.12527	2.33403e-05	0.000920693	down	-	-	-	-	-	-	-	-
TRINITY_DN11323_c0_g1	42.1162	193.866	-2.20261	2.57721e-09	4.31047e-07	down	cd17356, MFS_HXT, Fungal Hexose transporter subfamily of the Major Facilitator Superfamily of transporters and similar proteins. The fungal hexose transporter (HXT) subfamily is comprised of functionally redundant proteins that function mainly in the transport of glucose, as well as other sugars such as galactose and fructose. Saccharomyces cerevisiae has 20 genes that encode proteins in this fam…	pfam00083, Sugar_tr, Sugar (and other) transporter. 4.65e-71	-	KOG0254, KOG0254, KOG0254, Predicted transporter (major facilitator superfamily) [General function prediction only]. 2.53e-72	sp|B8MYS7|MF127_ASPFN MFS glucose transporter mfs1 OS=Aspergillus flavus (strain ATCC 200026 / FGSC A1120 / NRRL 3357 / JCM 12722 / SRRC 167) GN=mfs1 PE=2 SV=1 0.0	GO:0005575, cellular_component;GO:0016020, membrane	CAF0851319.1 unnamed protein product [Didymodactylos carnosus] >CAF3636489.1 unnamed protein product [Didymodactylos carnosus] 5.99e-106	-
TRINITY_DN11352_c0_g1	0.157026	40.531	-8.01188	5.29535e-08	5.9308e-06	down	-	-	-	-	-	-	-	-
TRINITY_DN11366_c0_g2	0.244525	2.6848	-3.45676	0.00099257	0.0168027	down	-	-	-	-	sp|A0R665|ETHA_MYCS2 FAD-containing monooxygenase EthA OS=Mycobacterium smegmatis (strain ATCC 700084 / mc(2)155) GN=ethA PE=3 SV=1 1.75e-106	-	CAD7652970.1 unnamed protein product [Oppiella nova] >CAG2170157.1 unnamed protein product [Oppiella nova] 1.98e-102	-
TRINITY_DN11378_c0_g2	100.225	24.3776	2.03962	0.00107228	0.0179343	up	-	-	-	-	-	-	-	-
TRINITY_DN11387_c0_g1	5.6122	0.319836	4.13316	1.23974e-05	0.000562422	up	cd03313, enolase, Enolase: Enolases are homodimeric enzymes that catalyse the reversible dehydration of 2-phospho-D-glycerate to phosphoenolpyruvate as part of the glycolytic and gluconeogenesis pathways. The reaction is facilitated by the presence of metal ions. 5.68e-174	pfam00113, Enolase_C, Enolase, C-terminal TIM barrel domain. 4.94e-147	K01689-ko00010 Glycolysis / Gluconeogenesis;ko04066 HIF-1 signaling pathway;ko03018 RNA degradation;ko01200 Carbon metabolism;ko00680 Methane metabolism;ko01230 Biosynthesis of amino acids	KOG2670, KOG2670, KOG2670, Enolase [Carbohydrate transport and metabolism]. 0.0	sp|P06733|ENOA_HUMAN Alpha-enolase OS=Homo sapiens GN=ENO1 PE=1 SV=2 0.0	GO:0000015, phosphopyruvate hydratase complex;GO:0000122, negative regulation of transcription by RNA polymerase II;GO:0000976, transcription regulatory region sequence-specific DNA binding;GO:0000977, RNA polymerase II regulatory region sequence-specific DNA binding;GO:0000981, RNA polymerase II transcription factor activity, sequence-specific DNA binding;GO:0000982, transcription factor activit…	XP_025215442.1 alpha-enolase isoform X1 [Theropithecus gelada] 9.16e-315	Homo sapiens enolase 1 (ENO1), transcript variant 1, mRNA 0.0
TRINITY_DN11389_c0_g1	46.3176	243.436	-2.39391	6.4265e-05	0.00209387	down	cd02231, cupin_BLL6423-like, Bradyrhizobium japonicum BLL6423 and related proteins, cupin domain. This family includes bacterial and fungal proteins homologous to BLL6423, a Bradyrhizobium japonicum protein of unknown function; it includes a structure of an uncharacterized protein from Novosphingobium aromaticivorans. Proteins in this family belong to the cupin superfamily with a conserved "jelly…	-	-	-	-	-	-	-
TRINITY_DN11393_c0_g1	3.96927	0.208774	4.24886	0.00474416	0.0496768	up	cd00051, EFh, EF-hand, calcium binding motif; A diverse superfamily of calcium sensors and calcium signal modulators; most examples in this alignment model have 2 active canonical EF hands. Ca2+ binding induces a conformational change in the EF-hand motif, leading to the activation or inactivation of target proteins. EF-hands tend to occur in pairs or higher copy numbers. 1.15e-07	-	K12751-ko04270 Vascular smooth muscle contraction;ko04921 Oxytocin signaling pathway	KOG0030, KOG0030, KOG0030, Myosin essential light chain, EF-Hand protein superfamily [Cytoskeleton]. 6.06e-72	sp|Q64119|MYL6_RAT Myosin light polypeptide 6 OS=Rattus norvegicus GN=Myl6 PE=1 SV=3 2.37e-99	GO:0000146, microfilament motor activity;GO:0000278, mitotic cell cycle;GO:0000281, mitotic cytokinesis;GO:0000910, cytokinesis;GO:0003008, system process;GO:0003012, muscle system process;GO:0003674, molecular_function;GO:0003774, motor activity;GO:0003824, catalytic activity;GO:0005198, structural molecule activity;GO:0005488, binding;GO:0005515, protein binding;GO:0005575, cellular_component;G…	XP_026309793.2 LOW QUALITY PROTEIN: uncharacterized protein LOC111524680 [Piliocolobus tephrosceles] 1.30e-113	PREDICTED: Macaca mulatta myosin light chain 6 (MYL6), transcript variant X3, mRNA 0.0
TRINITY_DN11398_c0_g1	10.6611	25.2698	-1.24506	0.00151215	0.023534	down	-	-	-	KOG3043, KOG3043, KOG3043, Predicted hydrolase related to dienelactone hydrolase [General function prediction only]. 1.88e-07	sp|O14359|YB4E_SCHPO Uncharacterized AIM2 family protein C30D10.14 OS=Schizosaccharomyces pombe (strain 972 / ATCC 24843) GN=SPBC30D10.14 PE=3 SV=1 9.94e-26	-	NP_001140008.1 C30D10.14 [Salmo salar] >ACM09207.1 C30D10.14 [Salmo salar] >QPG96215.1 hypothetical protein C2857_003570 [Epichloe festucae Fl1] 2.43e-56	-
TRINITY_DN11429_c0_g1	4.14887	0.497951	3.05864	0.000859581	0.0150595	up	-	-	-	-	-	-	-	-
TRINITY_DN11439_c0_g1	1.25116	7.1088	-2.50634	8.27564e-06	0.000410315	down	-	pfam00264, Tyrosinase, Common central domain of tyrosinase. This family also contains polyphenol oxidases and some hemocyanins. Binds two copper ions via two sets of three histidines. This family is related to pfam00372. 1.40e-17	K00505-ko00350 Tyrosine metabolism;ko00740 Riboflavin metabolism;ko00950 Isoquinoline alkaloid biosynthesis;ko00965 Betalain biosynthesis;ko04916 Melanogenesis	-	-	-	KAH9507504.1 putative tyrosinase-like protein tyr-3 [Bulinus truncatus] 1.80e-06	-
TRINITY_DN11443_c0_g1	0.444662	2.32145	-2.38424	0.00163683	0.0249483	down	cd12163, 2-Hacid_dh_5, Putative D-isomer specific 2-hydroxyacid dehydrogenases. 2-Hydroxyacid dehydrogenases catalyze the conversion of a wide variety of D-2-hydroxy acids to their corresponding keto acids. The general mechanism is (R)-lactate + acceptor to pyruvate + reduced acceptor. Formate/glycerate and related dehydrogenases of the D-specific 2-hydroxyacid dehydrogenase superfamily include g…	pfam02826, 2-Hacid_dh_C, D-isomer specific 2-hydroxyacid dehydrogenase, NAD binding domain. This domain is inserted into the catalytic domain, the large dehydrogenase and D-lactate dehydrogenase families in SCOP. N-terminal portion of which is represented by family pfam00389. 5.59e-28	-	KOG0069, KOG0069, KOG0069, Glyoxylate/hydroxypyruvate reductase (D-isomer-specific 2-hydroxy acid dehydrogenase superfamily) [Energy production and conversion]. 3.50e-22	sp|Q2VEQ7|DDH_HALMT D-2-hydroxyacid dehydrogenase OS=Haloferax mediterranei (strain ATCC 33500 / DSM 1411 / JCM 8866 / NBRC 14739 / NCIMB 2177 / R-4) GN=ddh PE=1 SV=1 1.19e-22	-	XP_031567941.1 uncharacterized protein LOC116302720 [Actinia tenebrosa] >XP_031567942.1 uncharacterized protein LOC116302720 [Actinia tenebrosa] 6.27e-25	-
TRINITY_DN11447_c0_g1	1.48902	6.08282	-2.03038	0.00213312	0.0297758	down	-	pfam00732, GMC_oxred_N, GMC oxidoreductase. This family of proteins bind FAD as a cofactor. 3.70e-06	-	KOG1238, KOG1238, KOG1238, Glucose dehydrogenase/choline dehydrogenase/mandelonitrile lyase (GMC oxidoreductase family) [General function prediction only]. 1.96e-44	sp|P04841|ALOX_PICAN Alcohol oxidase OS=Pichia angusta GN=MOX PE=1 SV=1 8.59e-106	-	MCL4125520.1 hypothetical protein [Idotea baltica] 8.53e-33	-
TRINITY_DN11453_c0_g1	11.4405	109.066	-3.25297	5.55847e-06	0.000300541	down	-	pfam11327, DUF3129, Protein of unknown function (DUF3129). This eukaryotic family of proteins has no known function. 1.61e-12	-	-	-	-	-	-
TRINITY_DN11466_c0_g1	12.5041	2.95654	2.08042	0.000542017	0.0108611	up	-	pfam05277, DUF726, Protein of unknown function (DUF726). This family consists of several uncharacterized eukaryotic proteins. 7.36e-57	-	KOG2385, KOG2385, KOG2385, Uncharacterized conserved protein [Function unknown]. 7.56e-46	sp|Q9US10|YK68_SCHPO Uncharacterized membrane protein C6F6.13c OS=Schizosaccharomyces pombe (strain 972 / ATCC 24843) GN=SPAC607.08c PE=3 SV=1 1.12e-43	GO:0003674, molecular_function;GO:0003824, catalytic activity;GO:0006810, transport;GO:0008150, biological_process;GO:0016192, vesicle-mediated transport;GO:0016298, lipase activity;GO:0016787, hydrolase activity;GO:0016788, hydrolase activity, acting on ester bonds;GO:0051179, localization;GO:0051234, establishment of localization	CAG5128179.1 unnamed protein product, partial [Candidula unifasciata] 4.71e-44	-
TRINITY_DN11467_c0_g1	0.562254	3.53593	-2.6528	8.71923e-05	0.00266117	down	cd17327, MFS_FEN2_like, Pantothenate transporter FEN2 and similar transporters of the Major Facilitator Superfamily. This family is composed of Saccharomyces cerevisiae pantothenate transporter FEN2 (or fenpropimorph resistance protein 2) and similar proteins from fungi and bacteria including fungal vitamin H transporter, allantoate permease, and high-affinity nicotinic acid transporter, as well …	-	-	KOG2533, KOG2533, KOG2533, Permease of the major facilitator superfamily [Carbohydrate transport and metabolism]. 5.65e-62	sp|O94491|YC7A_SCHPO Uncharacterized transporter C417.10 OS=Schizosaccharomyces pombe (strain 972 / ATCC 24843) GN=SPCC417.10 PE=3 SV=1 3.77e-89	-	CAF4857218.1 unnamed protein product [Rotaria sp. Silwood1] 2.12e-49	-
TRINITY_DN11472_c0_g1	1.84979	8.66482	-2.22781	6.80059e-05	0.00218176	down	-	-	-	-	-	-	-	-
TRINITY_DN11483_c0_g1	8.41588	33.2589	-1.98255	0.000181636	0.00474602	down	cd17356, MFS_HXT, Fungal Hexose transporter subfamily of the Major Facilitator Superfamily of transporters and similar proteins. The fungal hexose transporter (HXT) subfamily is comprised of functionally redundant proteins that function mainly in the transport of glucose, as well as other sugars such as galactose and fructose. Saccharomyces cerevisiae has 20 genes that encode proteins in this fam…	pfam00083, Sugar_tr, Sugar (and other) transporter. 1.31e-43	-	KOG0254, KOG0254, KOG0254, Predicted transporter (major facilitator superfamily) [General function prediction only]. 6.17e-42	sp|Q6MYX6|QUTD_ASPFU Probable quinate permease OS=Neosartorya fumigata (strain ATCC MYA-4609 / Af293 / CBS 101355 / FGSC A1100) GN=qutD PE=3 SV=1 7.71e-75	-	CAF0749174.1 unnamed protein product [Didymodactylos carnosus] >CAF3527612.1 unnamed protein product [Didymodactylos carnosus] 1.02e-61	-
TRINITY_DN11496_c0_g1	21.987	3.22552	2.76905	5.20854e-05	0.00177062	up	-	-	-	-	-	-	-	-
TRINITY_DN11498_c0_g1	2.42783	16.3031	-2.7474	5.51827e-06	0.000299659	down	-	-	-	-	-	-	-	-
TRINITY_DN11508_c0_g1	145.022	417.92	-1.52696	0.00279964	0.0356123	down	-	-	-	-	-	-	-	-
TRINITY_DN11512_c0_g1	0.284468	2.80222	-3.30023	0.00024293	0.00594019	down	-	-	-	-	-	-	-	-
TRINITY_DN11523_c0_g2	25.1214	4.51429	2.47634	0.000188481	0.00488365	up	-	-	-	-	-	-	-	-
TRINITY_DN11526_c0_g1	26.6418	201.541	-2.91931	5.5366e-10	1.15752e-07	down	-	-	-	-	-	-	-	-
TRINITY_DN11537_c0_g1	17.7742	60.5261	-1.76777	0.000460589	0.00962938	down	-	-	-	-	sp|Q54410|TAP_STRLI Tripeptidyl aminopeptidase OS=Streptomyces lividans GN=tap PE=1 SV=1 2.04e-08	-	KAJ3029252.1 hypothetical protein HDU68_012663 [Siphonaria sp. JEL0065] 9.23e-23	-
TRINITY_DN11540_c0_g1	38.584	12.5443	1.62097	0.00352487	0.0417063	up	cd02344, ZZ_HERC2, Zinc finger, ZZ type. Zinc finger present in HERC2 and related proteins. HERC2 is a potential E3 ubiquitin protein ligase and/or guanine nucleotide exchange factor. The ZZ motif coordinates two zinc ions and most likely participates in ligand binding or molecular scaffolding. 1.72e-09	pfam00569, ZZ, Zinc finger, ZZ type. Zinc finger present in dystrophin, CBP/p300. ZZ in dystrophin binds calmodulin. Putative zinc finger; binding not yet shown. Four to six cysteine residues in its sequence are responsible for coordinating zinc ions, to reinforce the structure. 6.87e-07	-	KOG4582, KOG4582, KOG4582, Uncharacterized conserved protein, contains ZZ-type Zn-finger [General function prediction only]. 7.22e-07	sp|O95714|HERC2_HUMAN E3 ubiquitin-protein ligase HERC2 OS=Homo sapiens GN=HERC2 PE=1 SV=2 1.21e-08	-	XP_002113110.1 hypothetical protein TRIADDRAFT_56938 [Trichoplax adhaerens] >EDV25220.1 hypothetical protein TRIADDRAFT_56938 [Trichoplax adhaerens] 1.09e-46	-
TRINITY_DN11545_c1_g1	19.6194	5.8253	1.75188	0.00194916	0.0280393	up	-	-	-	KOG0828, KOG0828, KOG0828, Predicted E3 ubiquitin ligase [Posttranslational modification, protein turnover, chaperones]. 2.10e-31	sp|P36096|TUL1_YEAST Transmembrane E3 ubiquitin-protein ligase 1 OS=Saccharomyces cerevisiae (strain ATCC 204508 / S288c) GN=TUL1 PE=1 SV=1 4.92e-16	GO:0000139, Golgi membrane;GO:0000151, ubiquitin ligase complex;GO:0000209, protein polyubiquitination;GO:0000322, storage vacuole;GO:0000323, lytic vacuole;GO:0000324, fungal-type vacuole;GO:0003674, molecular_function;GO:0003824, catalytic activity;GO:0004842, ubiquitin-protein transferase activity;GO:0005488, binding;GO:0005575, cellular_component;GO:0005622, intracellular;GO:0005623, cell;GO:…	-	-
TRINITY_DN11547_c0_g1	7.63832	47.5024	-2.63667	1.11443e-05	0.000515844	down	-	-	-	-	sp|P38680|MTR_NEUCR N amino acid transport system protein OS=Neurospora crassa (strain ATCC 24698 / 74-OR23-1A / CBS 708.71 / DSM 1257 / FGSC 987) GN=mtr PE=3 SV=2 2.46e-31	-	-	-
TRINITY_DN11558_c0_g1	108.28	20.1961	2.42262	0.000159134	0.00430211	up	-	-	-	-	-	-	-	-
TRINITY_DN11562_c0_g1	6.45652	28.4602	-2.14012	1.2921e-07	1.22789e-05	down	cd03461, 1,2-HQD, Hydroxyquinol 1,2-dioxygenase (1,2-HQD) catalyzes the ring cleavage of hydroxyquinol (1,2,4-trihydroxybenzene), a intermediate in the degradation of a large variety of aromatic compounds including some polychloro- and nitroaromatic pollutants, to form 3-hydroxy-cis,cis-muconates. 1,2-HQD blongs to the aromatic dioxygenase family, a family of mononuclear non-heme intradiol-cleavi…	pfam00775, Dioxygenase_C, Dioxygenase. 1.26e-26	-	-	sp|Q6F4M7|NPCC_RHOOP Hydroxyquinol 1,2-dioxygenase OS=Rhodococcus opacus GN=npcC PE=2 SV=1 1.13e-37	-	CAF1160197.1 unnamed protein product [Didymodactylos carnosus] >CAF3923686.1 unnamed protein product [Didymodactylos carnosus] 1.65e-78	-
TRINITY_DN11563_c0_g1	5.32321	48.3064	-3.18184	0.0038569	0.0438643	down	cd05384, CAP_PRY1-like, CAP (cysteine-rich secretory proteins, antigen 5, and pathogenesis-related 1 proteins) domain of pathogen-related yeast 1 (PRY1) protein and similar fungal proteins. PRY1, also called pathogenesis-related protein 1, is a yeast protein that is up-regulated in core ESCRT mutants. It is a secreted protein required for efficient export of lipids such as acetylated sterols, and…	pfam00743, FMO-like, Flavin-binding monooxygenase-like. This family includes FMO proteins, cyclohexanone mono-oxygenase and a number of different mono-oxygenases. 1.49e-13	-	KOG3017, KOG3017, KOG3017, Defense-related protein containing SCP domain [Function unknown]. 3.47e-09	sp|A7HU16|BVMO_PARL1 Baeyer-Villiger monooxygenase OS=Parvibaculum lavamentivorans (strain DS-1 / DSM 13023 / NCIMB 13966) GN=Plav_1781 PE=1 SV=1 2.17e-131	-	KAE9551537.1 hypothetical protein FO519_005251 [Halicephalobus sp. NKZ332] 1.65e-125	-
TRINITY_DN11568_c0_g1	25.2635	5.77426	2.12934	0.000638826	0.0122156	up	cd17323, MFS_Tpo1_MDR_like, Yeast Polyamine transporter 1 (Tpo1) and similar multidrug resistance (MDR) transporters of the Major Facilitator Superfamily. This family is composed of fungal multidrug resistance (MDR) transporters including several proteins from Saccharomyces cerevisiae such as polyamine transporters 1-4 (Tpo1-4), quinidine resistance proteins 1-3 (Qdr1-3), dityrosine transporter 1…	-	-	KOG0255, KOG0255, KOG0255, Synaptic vesicle transporter SVOP and related transporters (major facilitator superfamily) [General function prediction only]. 1.98e-11	sp|P40475|QDR1_YEAST Quinidine resistance protein 1 OS=Saccharomyces cerevisiae (strain ATCC 204508 / S288c) GN=QDR1 PE=1 SV=1 3.81e-42	-	CAF1393955.1 unnamed protein product [Didymodactylos carnosus] >CAF4288205.1 unnamed protein product [Didymodactylos carnosus] 6.68e-17	-
TRINITY_DN11571_c0_g1	3.51303	0.661127	2.40972	0.00386506	0.0438682	up	-	-	-	-	-	-	-	-
TRINITY_DN11584_c0_g2	15.787	2.57547	2.61583	5.08497e-05	0.00173824	up	-	-	K12842-ko03040 Spliceosome	KOG0151, KOG0151, KOG0151, Predicted splicing regulator, contains RRM, SWAP and RPR domains [General function prediction only]. 1.07e-07	-	GO:0000375, RNA splicing, via transesterification reactions;GO:0000377, RNA splicing, via transesterification reactions with bulged adenosine as nucleophile;GO:0000398, mRNA splicing, via spliceosome;GO:0003674, molecular_function;GO:0003676, nucleic acid binding;GO:0003723, RNA binding;GO:0005488, binding;GO:0005575, cellular_component;GO:0005622, intracellular;GO:0005623, cell;GO:0005634, nucle…	CAI2723722.1 unnamed protein product [Schistosoma spindale] 9.52e-14	-
TRINITY_DN11584_c0_g3	10.1052	1.68166	2.58715	0.000545226	0.0108906	up	-	-	K00306-ko00310 Lysine degradation;ko04146 Peroxisome;ko00260 Glycine, serine and threonine metabolism	KOG2820, KOG2820, KOG2820, FAD-dependent oxidoreductase [General function prediction only]. 5.15e-26	sp|O43029|FAP1_SCHPO L-pipecolate oxidase OS=Schizosaccharomyces pombe (strain 972 / ATCC 24843) GN=fap1 PE=1 SV=1 2.04e-57	-	CAF1437412.1 unnamed protein product [Adineta steineri] >CAF4039705.1 unnamed protein product [Adineta steineri] >CAF4066015.1 unnamed protein product [Adineta steineri] 1.49e-42	-
TRINITY_DN11591_c0_g1	153.383	360.175	-1.23156	0.00217882	0.030183	down	cd21155, PUA_MCTS-1-like, PUA RNA-binding domain of malignant T cell-amplified sequence 1 and related proteins. The RNA-binding PUA (PseudoUridine synthase and Archaeosine transglycosylase) domain was detected in a number of proteins involved in RNA metabolism. Members of this eukaryotic family, labelled MCT-1 (malignant T cell-amplified sequence 1) or MCTS-1 (multiple copies T-cell lymphoma-1), …	pfam17832, Pre-PUA, Pre-PUA-like domain. This Pre-PUA-like domain is found in a wide variety of proteins including the eukaryotic translation initiation factor 2D, where it is found at the N-terminus. 6.69e-14	-	KOG2523, KOG2523, KOG2523, Predicted RNA-binding protein with PUA domain [Translation, ribosomal structure and biogenesis]. 1.34e-42	sp|P89886|TMA20_YEAST Translation machinery-associated protein 20 OS=Saccharomyces cerevisiae (strain ATCC 204508 / S288c) GN=TMA20 PE=1 SV=1 1.62e-46	-	XP_022120948.1 malignant T-cell-amplified sequence 1 homolog [Pieris rapae] >XP_045532279.1 malignant T-cell-amplified sequence 1 homolog [Pieris brassicae] >XP_047507859.1 malignant T-cell-amplified sequence 1 homolog [Pieris napi] 3.39e-36	-
TRINITY_DN11594_c0_g1	1.18756	20.3908	-4.10185	1.97839e-10	4.87464e-08	down	cd08157, catalase_fungal, Fungal catalases similar to yeast catalases A and T. Catalase is a ubiquitous enzyme found in both prokaryotes and eukaryotes, which is involved in the protection of cells from the toxic effects of peroxides. It catalyzes the conversion of hydrogen peroxide to water and molecular oxygen. Catalases also utilize hydrogen peroxide to oxidize various substrates such as alcoh…	pfam00199, Catalase, Catalase. 9.19e-10	K03781-ko04011 MAPK signaling pathway - yeast;ko01200 Carbon metabolism;ko00630 Glyoxylate and dicarboxylate metabolism;ko04212 Longevity regulating pathway - worm;ko04211 Longevity regulating pathway - mammal;ko04146 Peroxisome;ko00380 Tryptophan metabolism;ko04213 Longevity regulating pathway - multiple species;ko04068 FoxO signaling pathway	KOG0047, KOG0047, KOG0047, Catalase [Inorganic ion transport and metabolism]. 2.98e-118	sp|O13289|CATA_CANAL Peroxisomal catalase OS=Candida albicans (strain SC5314 / ATCC MYA-2876) GN=CTA1 PE=2 SV=4 1.05e-126	GO:0000302, response to reactive oxygen species;GO:0001306, age-dependent response to oxidative stress;GO:0001315, age-dependent response to reactive oxygen species;GO:0003674, molecular_function;GO:0003824, catalytic activity;GO:0004096, catalase activity;GO:0004601, peroxidase activity;GO:0005488, binding;GO:0005575, cellular_component;GO:0005618, cell wall;GO:0005622, intracellular;GO:0005623,…	VEN55345.1 unnamed protein product, partial [Callosobruchus maculatus] 1.00e-112	-
TRINITY_DN11595_c0_g1	4.15001	14.5533	-1.81016	2.87005e-06	0.000168741	down	cd03311, CIMS_C_terminal_like, CIMS - Cobalamine-independent methonine synthase, or MetE, C-terminal domain_like. Many members have been characterized as 5-methyltetrahydropteroyltriglutamate-homocysteine methyltransferases, EC:2.1.1.14, mostly from bacteria and plants. This enzyme catalyses the last step in the production of methionine by transferring a methyl group from 5-methyltetrahydrofolate…	-	-	KOG0379, KOG0379, KOG0379, Kelch repeat-containing proteins [General function prediction only]. 4.98e-10	sp|P42318|YXJG_BACSU Uncharacterized protein YxjG OS=Bacillus subtilis (strain 168) GN=yxjG PE=4 SV=3 1.01e-45	-	KAG4068128.1 hypothetical protein HA402_001553 [Bradysia odoriphaga] 1.53e-60	-
TRINITY_DN11600_c0_g2	2.44279	8.47999	-1.79553	8.19183e-05	0.00251859	down	-	-	-	-	-	-	XP_018899945.1 PREDICTED: uncharacterized protein LOC109032327 [Bemisia tabaci] 1.38e-24	-
TRINITY_DN11603_c0_g1	0.976302	4.21596	-2.11046	0.00456798	0.0483959	down	-	-	-	-	-	-	-	-
TRINITY_DN11613_c0_g1	1.47156	9.06825	-2.62348	9.97297e-06	0.000475669	down	cd02608, P-type_ATPase_Na-K_like, alpha-subunit of Na(+)/K(+)-ATPases and of gastric H(+)/K(+)-ATPase, similar to the human Na(+)/K(+)-ATPase alpha subunits 1-4. This subfamily includes the alpha subunit of Na(+)/K(+)-ATPase a heteromeric transmembrane protein composed of an alpha- and beta-subunit and an optional third subunit belonging to the FXYD proteins which are more tissue specific regulat…	pfam00122, E1-E2_ATPase, E1-E2 ATPase. 1.65e-20	K01539-ko04260 Cardiac muscle contraction;ko04261 Adrenergic signaling in cardiomyocytes;ko04974 Protein digestion and absorption;ko04976 Bile secretion;ko04970 Salivary secretion;ko04024 cAMP signaling pathway;ko04911 Insulin secretion;ko04978 Mineral absorption;ko04022 cGMP - PKG signaling pathway;ko04964 Proximal tubule bicarbonate reclamation;ko04973 Carbohydrate digestion and absorption;ko04…	KOG0203, KOG0203, KOG0203, Na+/K+ ATPase, alpha subunit [Inorganic ion transport and metabolism]. 0.0	sp|P06685|AT1A1_RAT Sodium/potassium-transporting ATPase subunit alpha-1 OS=Rattus norvegicus GN=Atp1a1 PE=1 SV=1 1.71e-174	-	XP_037039545.1 sodium/potassium-transporting ATPase subunit alpha-1-like isoform X2 [Bradysia coprophila] 1.33e-238	-
TRINITY_DN11632_c0_g1	5.90822	17.0768	-1.53124	0.000896551	0.0155244	down	-	-	-	-	-	-	-	-
TRINITY_DN11643_c0_g1	0.757663	3.57267	-2.23738	0.00284559	0.0359328	down	cd01939, Ketohexokinase, Ketohexokinase (fructokinase, KHK) catalyzes the phosphorylation of fructose to fructose-1-phosphate (F1P), the first step in the metabolism of dietary fructose. KHK can also phosphorylate several other furanose sugars. It is found in higher eukaryotes where it is believed to function as a dimer and requires K(+) and ATP to be active. In humans, hepatic KHK deficiency cau…	pfam02615, Ldh_2, Malate/L-lactate dehydrogenase. This family consists of bacterial and archaeal Malate/L-lactate dehydrogenase. L-lactate dehydrogenase, EC:1.1.1.27, catalyzes the reaction (S)-lactate + NAD(+) <=> pyruvate + NADH. Malate dehydrogenase, EC:1.1.1.37 and EC:1.1.1.82, catalyzes the reactions: (S)-malate + NAD(+) <=> oxaloacetate + NADH, and (S)-malate + NADP(+) <=> oxaloacetate + NA…	-	KOG2947, KOG2947, KOG2947, Carbohydrate kinase [Carbohydrate transport and metabolism]. 5.05e-09	sp|Q58820|COMC_METJA L-sulfolactate dehydrogenase OS=Methanocaldococcus jannaschii (strain ATCC 43067 / DSM 2661 / JAL-1 / JCM 10045 / NBRC 100440) GN=comC PE=1 SV=1 1.77e-65	-	XP_037939974.1 uncharacterized oxidoreductase YjmC-like [Teleopsis dalmanni] 9.36e-54	-
TRINITY_DN11650_c0_g1	1.38674	4.02971	-1.53898	0.0013561	0.0215602	down	-	-	-	-	-	-	-	-
TRINITY_DN11671_c0_g1	9.71353	0.129151	6.23287	0.00310309	0.0381994	up	-	-	K03879-ko00190 Oxidative phosphorylation	-	sp|P03891|NU2M_HUMAN NADH-ubiquinone oxidoreductase chain 2 OS=Homo sapiens GN=MT-ND2 PE=1 SV=2 8.50e-17	GO:0003674, molecular_function;GO:0003824, catalytic activity;GO:0003954, NADH dehydrogenase activity;GO:0005102, signaling receptor binding;GO:0005488, binding;GO:0005515, protein binding;GO:0005575, cellular_component;GO:0005622, intracellular;GO:0005623, cell;GO:0005737, cytoplasm;GO:0005739, mitochondrion;GO:0005740, mitochondrial envelope;GO:0005743, mitochondrial inner membrane;GO:0005746, …	AVW83513.1 NADH dehydrogenase subunit 2 [Homo sapiens] >AWN02102.1 NADH dehydrogenase subunit 2 [Homo sapiens] 9.50e-199	Homo sapiens isolate PNG99 haplogroup Q1a mitochondrion, complete genome 0.0
TRINITY_DN11672_c0_g2	269.232	71.3278	1.91631	0.00201641	0.0286779	up	-	pfam00344, SecY, SecY translocase. 1.29e-14	K10956-ko03060 Protein export;ko04141 Protein processing in endoplasmic reticulum;ko04145 Phagosome	KOG1373, KOG1373, KOG1373, Transport protein Sec61, alpha subunit [Intracellular trafficking, secretion, and vesicular transport, Posttranslational modification, protein turnover, chaperones]. 0.0	sp|Q870W0|SC61A_NEUCR Protein transport protein SEC61 subunit alpha OS=Neurospora crassa (strain ATCC 24698 / 74-OR23-1A / CBS 708.71 / DSM 1257 / FGSC 987) GN=sec-61 PE=3 SV=1 0.0	GO:0000322, storage vacuole;GO:0000323, lytic vacuole;GO:0000324, fungal-type vacuole;GO:0003674, molecular_function;GO:0005048, signal sequence binding;GO:0005215, transporter activity;GO:0005488, binding;GO:0005575, cellular_component;GO:0005622, intracellular;GO:0005623, cell;GO:0005737, cytoplasm;GO:0005773, vacuole;GO:0005783, endoplasmic reticulum;GO:0005784, Sec61 translocon complex;GO:000…	XP_016418653.1 PREDICTED: protein transport protein Sec61 subunit alpha-like 1 [Sinocyclocheilus rhinocerous] 4.64e-206	Caligus rogercresseyi clone crog-evm-503-152 transport protein Sec61 subunit alpha putative mRNA, complete cds 4.12e-33
TRINITY_DN11679_c0_g1	11.5747	2.87166	2.01101	0.00107933	0.0180282	up	-	-	-	-	sp|D4AS41|A7056_ARTBC Uncharacterized FAD-linked oxidoreductase ARB_02478 OS=Arthroderma benhamiae (strain ATCC MYA-4681 / CBS 112371) GN=ARB_07056 PE=1 SV=2 1.40e-06	-	CAF1052714.1 unnamed protein product [Didymodactylos carnosus] >CAF1204979.1 unnamed protein product [Didymodactylos carnosus] >CAF3819371.1 unnamed protein product [Didymodactylos carnosus] >CAF3969335.1 unnamed protein product [Didymodactylos carnosus] 3.79e-65	-
TRINITY_DN11687_c0_g1	0.950839	56.369	-5.88956	1.81834e-17	1.90077e-14	down	-	-	-	-	-	-	-	-
TRINITY_DN11688_c0_g1	3.57124	0.506823	2.81687	0.000351696	0.00784528	up	-	pfam05730, CFEM, CFEM domain. This fungal specific cysteine rich domain is found in some proteins with proposed roles in fungal pathogenesis. The structure of the CFEM domain containing protein 'Surface antigen protein 2' from Candida albicans has been solved. 1.50e-06	-	-	-	-	-	-
TRINITY_DN11747_c0_g1	32.9585	6.89857	2.25628	0.000100403	0.0029987	up	-	-	-	-	-	-	-	-
TRINITY_DN11768_c0_g1	1.51797	15.5568	-3.35732	4.80567e-09	7.17647e-07	down	cd11060, CYP57A1-like, cytochrome P450 family 57, subfamily A, polypeptide 1 and similar cytochrome P450s. This family is composed of fungal cytochrome P450s including: Nectria haematococca cytochrome P450 57A1 (CYP57A1), also called pisatin demethylase, which detoxifies the phytoalexin pisatin; Penicillium aethiopicum P450 monooxygenase gsfF, also called griseofulvin synthesis protein F, which c…	pfam00067, p450, Cytochrome P450. Cytochrome P450s are haem-thiolate proteins involved in the oxidative degradation of various compounds. They are particularly well known for their role in the degradation of environmental toxins and mutagens. They can be divided into 4 classes, according to the method by which electrons from NAD(P)H are delivered to the catalytic site. Sequence conservation is re…	-	KOG0157, KOG0157, KOG0157, Cytochrome P450 CYP4/CYP19/CYP26 subfamilies [Secondary metabolites biosynthesis, transport and catabolism, Lipid transport and metabolism]. 8.82e-25	sp|Q12645|PID9_FUSSO Pisatin demethylase OS=Fusarium solani subsp. pisi GN=PDAT9 PE=3 SV=1 5.04e-101	-	XP_037037647.1 benzoate 4-monooxygenase-like [Bradysia coprophila] 1.48e-54	-
TRINITY_DN11774_c0_g1	9.65649	38.5134	-1.99579	0.00330927	0.0398383	down	-	-	-	-	-	-	-	-
TRINITY_DN11782_c0_g1	10.2892	44.07	-2.09867	0.000127093	0.00355069	down	cd17327, MFS_FEN2_like, Pantothenate transporter FEN2 and similar transporters of the Major Facilitator Superfamily. This family is composed of Saccharomyces cerevisiae pantothenate transporter FEN2 (or fenpropimorph resistance protein 2) and similar proteins from fungi and bacteria including fungal vitamin H transporter, allantoate permease, and high-affinity nicotinic acid transporter, as well …	-	-	KOG2533, KOG2533, KOG2533, Permease of the major facilitator superfamily [Carbohydrate transport and metabolism]. 4.34e-38	sp|Q9US44|YIZG_SCHPO Uncharacterized transporter C1002.16c OS=Schizosaccharomyces pombe (strain 972 / ATCC 24843) GN=SPAC1002.16c PE=3 SV=1 3.75e-43	-	CAF1249313.1 unnamed protein product [Adineta steineri] >CAF1533269.1 unnamed protein product [Adineta steineri] 1.07e-54	-
TRINITY_DN11786_c0_g1	3.83246	12.4794	-1.7032	0.000658649	0.0124212	down	-	-	-	-	-	-	-	-
TRINITY_DN11811_c0_g1	116.541	487.099	-2.06337	0.000225521	0.00562411	down	-	pfam00450, Peptidase_S10, Serine carboxypeptidase. 3.11e-25	-	KOG1282, KOG1282, KOG1282, Serine carboxypeptidases (lysosomal cathepsin A) [Amino acid transport and metabolism, Posttranslational modification, protein turnover, chaperones]. 2.52e-24	sp|D4ANB6|CBPYB_ARTBC Carboxypeptidase Y homolog ARB_05721 OS=Arthroderma benhamiae (strain ATCC MYA-4681 / CBS 112371) GN=ARB_05721 PE=1 SV=1 1.81e-34	-	GFQ92146.1 lysosomal protective protein [Trichonephila clavata] 1.99e-21	-
TRINITY_DN11837_c0_g1	0.561091	3.00527	-2.42119	0.000161643	0.00435117	down	-	pfam02705, K_trans, K+ potassium transporter. This is a family of K+ potassium transporters that are conserved across phyla, having both bacterial (KUP), yeast (HAK), and plant (AtKT) sequences as members. 8.68e-105	-	-	sp|Q9M7K4|POT5_ARATH Potassium transporter 5 OS=Arabidopsis thaliana GN=POT5 PE=1 SV=1 2.21e-130	-	CAF4849594.1 unnamed protein product [Rotaria sp. Silwood1] 1.65e-86	-
TRINITY_DN11853_c0_g1	3.59404	17.3097	-2.2679	0.00134411	0.0214783	down	cd05251, NmrA_like_SDR_a, NmrA (a transcriptional regulator) and HSCARG (an NADPH sensor) like proteins, atypical (a) SDRs. NmrA and HSCARG like proteins. NmrA is a negative transcriptional regulator of various fungi, involved in the post-translational modulation of the GATA-type transcription factor AreA. NmrA lacks the canonical GXXGXXG NAD-binding motif and has altered residues at the catalyti…	pfam05368, NmrA, NmrA-like family. NmrA is a negative transcriptional regulator involved in the post-translational modification of the transcription factor AreA. NmrA is part of a system controlling nitrogen metabolite repression in fungi. This family only contains a few sequences as iteration results in significant matches to other Rossmann fold families. 1.18e-15	-	-	sp|Q9HBL8|NMRL1_HUMAN NmrA-like family domain-containing protein 1 OS=Homo sapiens GN=NMRAL1 PE=1 SV=1 1.55e-11	-	CAF0926730.1 unnamed protein product [Didymodactylos carnosus] >CAF0949457.1 unnamed protein product [Didymodactylos carnosus] >CAF3703729.1 unnamed protein product [Didymodactylos carnosus] >CAF3725233.1 unnamed protein product [Didymodactylos carnosus] 5.87e-23	-
TRINITY_DN11856_c0_g1	82.671	21.0194	1.97566	0.00180977	0.0267638	up	-	pfam03184, DDE_1, DDE superfamily endonuclease. This family of proteins are related to pfam00665 and are probably endonucleases of the DDE superfamily. Transposase proteins are necessary for efficient DNA transposition. This domain is a member of the DDE superfamily, which contain three carboxylate residues that are believed to be responsible for coordinating metal ions needed for catalysis. The …	K06125-ko00130 Ubiquinone and other terpenoid-quinone biosynthesis	-	-	-	XP_039275173.1 uncharacterized protein LOC120349272 [Nilaparvata lugens] 2.47e-45	-
TRINITY_DN11864_c0_g1	5.13406	0.474287	3.43627	0.000208172	0.00530754	up	cd04497, hPOT1_OB1_like, hPOT1_OB1_like: A subfamily of OB folds similar to the first OB fold (OB1) of human protection of telomeres 1 protein (hPOT1), the single OB fold of the N-terminal domain of Schizosaccharomyces pombe POT1 (SpPOT1), and the first OB fold of the N-terminal domain of the alpha subunit (OB1Nalpha) of Oxytricha nova telomere end binding protein (OnTEBP). POT1 proteins recogniz…	pfam16686, POT1PC, ssDNA-binding domain of telomere protection protein. POT1PC is the ssDNA-binding domain on a family of fungal telomere protection protein 1 proteins. POT1PC is able to accommodate heterogeneous ssDNA ligands. Pot1 proteins are the proteins responsible for binding to and protecting the 3' single-stranded DNA (ssDNA) overhang at most eukaryotic telomeres. 2.27e-30	-	-	sp|O13988|POT1_SCHPO Protection of telomeres protein 1 OS=Schizosaccharomyces pombe (strain 972 / ATCC 24843) GN=pot1 PE=1 SV=2 2.95e-12	-	-	-
TRINITY_DN11889_c0_g1	1.25107	13.3543	-3.41606	0.00164388	0.0250253	down	cd05918, A_NRPS_SidN3_like, The adenylation (A) domain of siderophore-synthesizing nonribosomal peptide synthetases (NRPS). The adenylation (A) domain of NRPS recognizes a specific amino acid or hydroxy acid and activates it as an (amino) acyl adenylate by hydrolysis of ATP. The activated acyl moiety then forms a thioester to the enzyme-bound cofactor phosphopantetheine of a peptidyl carrier prot…	pfam00501, AMP-binding, AMP-binding enzyme. 7.24e-13	-	KOG1176, KOG1176, KOG1176, Acyl-CoA synthetase [Lipid transport and metabolism]. 4.84e-18	sp|E9FCP4|DTXS1_METRA Nonribosomal peptide synthetase dtxS1 OS=Metarhizium robertsii (strain ARSEF 23 / ATCC MYA-3075) GN=dtxS1 PE=1 SV=2 2.16e-18	-	XP_031634798.1 uncharacterized protein LOC116348076 [Contarinia nasturtii] 1.31e-145	-
TRINITY_DN11890_c0_g1	63.8765	326.204	-2.35242	1.33326e-09	2.42383e-07	down	cd03232, ABCG_PDR_domain2, Second domain of the pleiotropic drug resistance-like (PDR) subfamily G of ATP-binding cassette transporters. The pleiotropic drug resistance (PDR) is a well-described phenomenon occurring in fungi and shares several similarities with processes in bacteria and higher eukaryotes. This PDR subfamily represents domain I of its (ABC-IM)2 organization. ABC transporters are a…	pfam01061, ABC2_membrane, ABC-2 type transporter. 1.01e-19	-	KOG0065, KOG0065, KOG0065, Pleiotropic drug resistance proteins (PDR1-15), ABC superfamily [Secondary metabolites biosynthesis, transport and catabolism]. 1.77e-08	sp|O74676|CDR4_CANAX ABC transporter CDR4 OS=Candida albicans GN=CDR4 PE=3 SV=1 7.90e-16	GO:0000166, nucleotide binding;GO:0000322, storage vacuole;GO:0000323, lytic vacuole;GO:0000324, fungal-type vacuole;GO:0000724, double-strand break repair via homologous recombination;GO:0000725, recombinational repair;GO:0003674, molecular_function;GO:0003824, catalytic activity;GO:0004012, phospholipid-translocating ATPase activity;GO:0005215, transporter activity;GO:0005319, lipid transporter…	KAJ3009872.1 hypothetical protein HDU68_002453, partial [Siphonaria sp. JEL0065] 9.28e-167	-
TRINITY_DN11905_c0_g1	0.483365	5.37268	-3.47445	1.19233e-07	1.16848e-05	down	cd11059, CYP_fungal, unknown subfamily of fungal cytochrome P450s. This subfamily is composed of uncharacterized fungal cytochrome P450s. Cytochrome P450 (P450, CYP) is a large superfamily of heme-containing proteins that catalyze a variety of oxidative reactions of a large number of structurally different endogenous and exogenous compounds in organisms from all major domains of life. CYPs bind t…	pfam00067, p450, Cytochrome P450. Cytochrome P450s are haem-thiolate proteins involved in the oxidative degradation of various compounds. They are particularly well known for their role in the degradation of environmental toxins and mutagens. They can be divided into 4 classes, according to the method by which electrons from NAD(P)H are delivered to the catalytic site. Sequence conservation is re…	-	KOG0158, KOG0158, KOG0158, Cytochrome P450 CYP3/CYP5/CYP6/CYP9 subfamilies [Secondary metabolites biosynthesis, transport and catabolism]. 4.79e-21	sp|Q12608|STCB_EMENI Probable sterigmatocystin biosynthesis P450 monooxygenase STCB OS=Emericella nidulans (strain FGSC A4 / ATCC 38163 / CBS 112.46 / NRRL 194 / M139) GN=stcB PE=3 SV=2 6.48e-47	-	KAG4071074.1 hypothetical protein HA402_002746 [Bradysia odoriphaga] 1.79e-36	-
TRINITY_DN11916_c0_g1	25.8236	2.82571	3.192	0.000234933	0.00577842	up	cd08249, enoyl_reductase_like, enoyl_reductase_like. Member identified as possible enoyl reductase of the MDR family. 2-enoyl thioester reductase (ETR) catalyzes the NADPH-dependent dependent conversion of trans-2-enoyl acyl carrier protein/coenzyme A (ACP/CoA) to acyl-(ACP/CoA) in fatty acid synthesis. 2-enoyl thioester reductase activity has been linked in Candida tropicalis as essential in mai…	-	-	KOG1198, KOG1198, KOG1198, Zinc-binding oxidoreductase [Energy production and conversion, General function prediction only]. 6.35e-09	sp|Q8J0F9|MLCG_PENCI Deshydrogenase mlcG OS=Penicillium citrinum GN=mlcG PE=1 SV=1 2.41e-15	-	KAJ3030869.1 hypothetical protein HDU68_007512 [Siphonaria sp. JEL0065] 6.58e-24	-
TRINITY_DN11926_c0_g1	1.10978	8.59478	-2.95319	1.73913e-05	0.000734534	down	cd08948, 5beta-POR_like_SDR_a, progesterone 5-beta-reductase-like proteins (5beta-POR), atypical (a) SDRs. 5beta-POR catalyzes the reduction of progesterone to 5beta-pregnane-3,20-dione in Digitalis plants. This subgroup of atypical-extended SDRs, shares the structure of an extended SDR, but has a different glycine-rich nucleotide binding motif (GXXGXXG) and lacks the YXXXK active site motif of c…	-	-	-	sp|O74913|YJ72_SCHPO Uncharacterized protein C757.02c OS=Schizosaccharomyces pombe (strain 972 / ATCC 24843) GN=SPCC757.02c PE=4 SV=1 1.44e-70	GO:0003674, molecular_function;GO:0003824, catalytic activity;GO:0008150, biological_process;GO:0008152, metabolic process;GO:0016491, oxidoreductase activity;GO:0055114, oxidation-reduction process	CAF1365626.1 unnamed protein product [Didymodactylos carnosus] >CAF4175110.1 unnamed protein product [Didymodactylos carnosus] 2.25e-37	-
TRINITY_DN11937_c0_g1	3.74182	0.077041	5.60197	0.000650233	0.012321	up	cd01681, aeEF2_snRNP_like_IV, This family represents domain IV of archaeal and eukaryotic elongation factor 2 (aeEF-2) and of an evolutionarily conserved U5 snRNP-specific protein. U5 snRNP is a GTP-binding factor closely related to the ribosomal translocase EF-2. In complex with GTP, EF-2 promotes the translocation step of translation. During translocation the peptidyl-tRNA is moved from the A s…	pfam00009, GTP_EFTU, Elongation factor Tu GTP binding domain. This domain contains a P-loop motif, also found in several other families such as pfam00071, pfam00025 and pfam00063. Elongation factor Tu consists of three structural domains, this plus two C-terminal beta barrel domains. 8.77e-22	K03234-ko04921 Oxytocin signaling pathway;ko04152 AMPK signaling pathway	KOG0469, KOG0469, KOG0469, Elongation factor 2 [Translation, ribosomal structure and biogenesis]. 0.0	sp|Q5R8Z3|EF2_PONAB Elongation factor 2 OS=Pongo abelii GN=EEF2 PE=2 SV=3 0.0	GO:0000302, response to reactive oxygen species;GO:0001101, response to acid chemical;GO:0001775, cell activation;GO:0002039, p53 binding;GO:0002244, hematopoietic progenitor cell differentiation;GO:0002252, immune effector process;GO:0002263, cell activation involved in immune response;GO:0002274, myeloid leukocyte activation;GO:0002275, myeloid cell activation involved in immune response;GO:000…	KAF3829591.1 hypothetical protein GH733_003855 [Mirounga leonina] 0.0	Homo sapiens eukaryotic translation elongation factor 2 (EEF2), mRNA 0.0
TRINITY_DN11971_c0_g1	2.07718	5.46349	-1.3952	8.31721e-05	0.00254466	down	cd18606, ABC_6TM_YOR1_D2_like, Six-transmembrane helical domain 2 (TMD2) of the yeast Yor1p and similar proteins; ABCC subfamily. This group includes the six-transmembrane domain 1 (TMD1) of the yeast Yor1p, an oligomycin resistance ABC transporter, and similar proteins. Members of this group belong to the MRP (multidrug resistance-associated protein) subfamily (ABCC). In addition to Yor1p, yeast…	pfam00664, ABC_membrane, ABC transporter transmembrane region. This family represents a unit of six transmembrane helices. Many members of the ABC transporter family (pfam00005) have two such regions. 2.90e-07	-	KOG0054, KOG0054, KOG0054, Multidrug resistance-associated protein/mitoxantrone resistance protein, ABC superfamily [Secondary metabolites biosynthesis, transport and catabolism]. 1.31e-12	sp|P53049|YOR1_YEAST Oligomycin resistance ATP-dependent permease YOR1 OS=Saccharomyces cerevisiae (strain ATCC 204508 / S288c) GN=YOR1 PE=1 SV=1 0.0	GO:0003674, molecular_function;GO:0003824, catalytic activity;GO:0005215, transporter activity;GO:0005575, cellular_component;GO:0005623, cell;GO:0005886, plasma membrane;GO:0006810, transport;GO:0006811, ion transport;GO:0006820, anion transport;GO:0006855, drug transmembrane transport;GO:0008150, biological_process;GO:0008559, xenobiotic transmembrane transporting ATPase activity;GO:0015238, dr…	KAJ3026257.1 hypothetical protein HDU68_005952 [Siphonaria sp. JEL0065] 7.07e-254	-
TRINITY_DN11975_c0_g1	1.35916	9.3856	-2.78773	5.08558e-05	0.00173824	down	cd00833, PKS, polyketide synthases (PKSs) polymerize simple fatty acids into a large variety of different products, called polyketides, by successive decarboxylating Claisen condensations. PKSs can be divided into 2 groups, modular type I PKSs consisting of one or more large multifunctional proteins and iterative type II PKSs, complexes of several monofunctional subunits. 9.10e-92	pfam00109, ketoacyl-synt, Beta-ketoacyl synthase, N-terminal domain. The structure of beta-ketoacyl synthase is similar to that of the thiolase family (pfam00108) and also chalcone synthase. The active site of beta-ketoacyl synthase is located between the N and C-terminal domains. The N-terminal domain contains most of the structures involved in dimer formation and also the active site cysteine. …	-	KOG1202, KOG1202, KOG1202, Animal-type fatty acid synthase and related proteins [Lipid transport and metabolism]. 1.79e-58	sp|A0A097ZPE0|ANDM_EMEVA Non-reducing polyketide synthase andM OS=Emericella variicolor GN=andM PE=1 SV=1 7.33e-173	-	CAF1473328.1 unnamed protein product [Adineta ricciae] 4.19e-127	-
TRINITY_DN11978_c0_g1	8.78686	26.1786	-1.57497	0.00237191	0.0319241	down	cd05346, SDR_c5, classical (c) SDR, subgroup 5. These proteins are members of the classical SDR family, with a canonical active site tetrad and a typical Gly-rich NAD-binding motif. SDRs are a functionally diverse family of oxidoreductases that have a single domain with a structurally conserved Rossmann fold (alpha/beta folding pattern with a central beta-sheet), an NAD(P)(H)-binding region, and …	pfam00106, adh_short, short chain dehydrogenase. This family contains a wide variety of dehydrogenases. 3.25e-09	-	KOG0725, KOG0725, KOG0725, Reductases with broad range of substrate specificities [General function prediction only]. 9.25e-06	sp|A0A097ZPE8|ANDI_EMEVA Short chain dehydrogenase andI OS=Emericella variicolor GN=andI PE=1 SV=1 8.75e-12	-	CAF1294775.1 unnamed protein product [Didymodactylos carnosus] >CAF1450992.1 unnamed protein product [Didymodactylos carnosus] >CAF4100083.1 unnamed protein product [Didymodactylos carnosus] >CAF4324392.1 unnamed protein product [Didymodactylos carnosus] 8.80e-21	-
TRINITY_DN12004_c0_g1	5.57341	191.144	-5.09996	1.67228e-05	0.000713505	down	-	-	-	-	-	-	-	-
TRINITY_DN12005_c0_g1	26.1097	55.0729	-1.07676	0.0024911	0.0328585	down	-	-	-	-	sp|Q4WMK0|GLIZ_ASPFU C6 finger domain transcription factor gliZ OS=Neosartorya fumigata (strain ATCC MYA-4609 / Af293 / CBS 101355 / FGSC A1100) GN=gliZ PE=2 SV=1 3.26e-07	-	-	-
TRINITY_DN12006_c0_g1	7.72111	19.6268	-1.34594	3.73138e-05	0.00134501	down	cd03249, ABC_MTABC3_MDL1_MDL2, ATP-binding cassette domain of a mitochondrial protein MTABC3 and related proteins. MTABC3 (also known as ABCB6) is a mitochondrial ATP-binding cassette protein involved in iron homeostasis and one of four ABC transporters expressed in the mitochondrial inner membrane, the other three being MDL1(ABC7), MDL2, and ATM1. In fact, the yeast MDL1 (multidrug resistance-li…	pfam00664, ABC_membrane, ABC transporter transmembrane region. This family represents a unit of six transmembrane helices. Many members of the ABC transporter family (pfam00005) have two such regions. 1.45e-10	K05658-ko04976 Bile secretion;ko02010 ABC transporters	KOG0055, KOG0055, KOG0055, Multidrug/pheromone exporter, ABC superfamily [Secondary metabolites biosynthesis, transport and catabolism]. 2.67e-102	sp|P36619|PMD1_SCHPO Leptomycin B resistance protein pmd1 OS=Schizosaccharomyces pombe (strain 972 / ATCC 24843) GN=pmd1 PE=3 SV=2 9.82e-89	-	XP_038030904.1 ATP-dependent translocase ABCB1 isoform X2 [Anas platyrhynchos] 1.70e-153	-
TRINITY_DN12015_c0_g1	4.17402	0.887565	2.23351	0.00394594	0.0444874	up	cd01437, parp_like, Poly(ADP-ribose) polymerase (parp) catalytic domain catalyses the covalent attachment of ADP-ribose units from NAD+ to itself and to a limited number of other DNA binding proteins, which decreases their affinity for DNA. Poly(ADP-ribose) polymerase is a regulatory component induced by DNA damage. The carboxyl-terminal region is the most highly conserved region of the protein. …	pfam00644, PARP, Poly(ADP-ribose) polymerase catalytic domain. Poly(ADP-ribose) polymerase catalyzes the covalent attachment of ADP-ribose units from NAD+ to itself and to a limited number of other DNA binding proteins, which decreases their affinity for DNA. Poly(ADP-ribose) polymerase is a regulatory component induced by DNA damage. The carboxyl-terminal region is the most highly conserved regi…	K10798-ko04212 Longevity regulating pathway - worm;ko04210 Apoptosis;ko03410 Base excision repair;ko04214 Apoptosis - fly	KOG1037, KOG1037, KOG1037, NAD+ ADP-ribosyltransferase Parp, required for poly-ADP ribosylation of nuclear proteins [Transcription, Replication, recombination and repair, Posttranslational modification, protein turnover, chaperones]. 1.41e-53	sp|O50017|PARP2_MAIZE Poly [ADP-ribose] polymerase 2 OS=Zea mays GN=PARP2 PE=2 SV=1 1.13e-94	-	KAJ3017754.1 Poly [ADP-ribose] polymerase 2 [Siphonaria sp. JEL0065] 3.11e-93	-
TRINITY_DN12016_c0_g1	222.558	44.7038	2.31571	8.05427e-06	0.000402521	up	cd00086, homeodomain, Homeodomain; DNA binding domains involved in the transcriptional regulation of key eukaryotic developmental processes; may bind to DNA as monomers or as homo- and/or heterodimers, in a sequence-specific manner. 9.75e-10	pfam00046, Homeobox, Homeobox domain. 7.83e-13	-	KOG0490, KOG0490, KOG0490, Transcription factor, contains HOX domain [General function prediction only]. 1.12e-10	sp|Q99160|HOY1_YARLI Homeobox protein HOY1 OS=Yarrowia lipolytica (strain CLIB 122 / E 150) GN=HOY1 PE=3 SV=2 5.93e-09	-	KAJ3022869.1 hypothetical protein HDU68_008908 [Siphonaria sp. JEL0065] 3.95e-16	-
TRINITY_DN12021_c1_g1	44.2786	91.869	-1.05297	0.000995786	0.0168344	down	cd08300, alcohol_DH_class_III, class III alcohol dehydrogenases. Members identified as glutathione-dependent formaldehyde dehydrogenase(FDH), a member of the zinc dependent/medium chain alcohol dehydrogenase family. FDH converts formaldehyde and NAD(P) to formate and NAD(P)H. The initial step in this process the spontaneous formation of a S-(hydroxymethyl)glutathione adduct from formaldehyde and …	pfam00107, ADH_zinc_N, Zinc-binding dehydrogenase. 4.33e-06	K00121-ko00010 Glycolysis / Gluconeogenesis;ko00071 Fatty acid degradation;ko00350 Tyrosine metabolism;ko00830 Retinol metabolism;ko01220 Degradation of aromatic compounds;ko00626 Naphthalene degradation;ko00980 Metabolism of xenobiotics by cytochrome P450;ko00625 Chloroalkane and chloroalkene degradation;ko01200 Carbon metabolism;ko00680 Methane metabolism;ko00982 Drug metabolism - cytochrome P4…	KOG0022, KOG0022, KOG0022, Alcohol dehydrogenase, class III [Secondary metabolites biosynthesis, transport and catabolism]. 1.55e-132	sp|P0CL53|FADH_ASPOR S-(hydroxymethyl)glutathione dehydrogenase OS=Aspergillus oryzae (strain ATCC 42149 / RIB 40) GN=FDH1 PE=3 SV=1 2.20e-08	GO:0000947, amino acid catabolic process to alcohol via Ehrlich pathway;GO:0000955, amino acid catabolic process via Ehrlich pathway;GO:0003674, molecular_function;GO:0003824, catalytic activity;GO:0004022, alcohol dehydrogenase (NAD) activity;GO:0005575, cellular_component;GO:0005622, intracellular;GO:0005623, cell;GO:0005737, cytoplasm;GO:0005739, mitochondrion;GO:0006066, alcohol metabolic pro…	CAH1407749.1 unnamed protein product [Nezara viridula] 1.11e-115	PREDICTED: Microcebus murinus alcohol dehydrogenase 4 (class II), pi polypeptide (ADH4), mRNA 5.97e-16
TRINITY_DN12022_c0_g1	24.6399	8.84441	1.47816	0.00474111	0.0496768	up	cd00685, Trans_IPPS_HT, Trans-Isoprenyl Diphosphate Synthases, head-to-tail. These trans-Isoprenyl Diphosphate Synthases (Trans_IPPS) catalyze head-to-tail (HT) (1'-4) condensation reactions. This CD includes all-trans (E)-isoprenyl diphosphate synthases which synthesize various chain length (C10, C15, C20, C25, C30, C35, C40, C45, and C50) linear isoprenyl diphosphates from precursors, isopenten…	pfam00348, polyprenyl_synt, Polyprenyl synthetase. 1.44e-29	-	KOG0711, KOG0711, KOG0711, Polyprenyl synthetase [Coenzyme transport and metabolism]. 1.26e-91	sp|Q92235|FPPS_GIBFU Farnesyl pyrophosphate synthase OS=Gibberella fujikuroi GN=FPPS PE=3 SV=1 1.11e-152	-	XP_038140103.1 farnesyl pyrophosphate synthase isoform X2 [Cyprinodon tularosa] 2.54e-95	-
TRINITY_DN12026_c0_g1	14.8636	4.03064	1.88271	0.00353498	0.0417063	up	-	-	-	-	-	-	-	-
TRINITY_DN12027_c0_g1	3.92809	66.8661	-4.08938	4.14454e-09	6.49864e-07	down	cd07103, ALDH_F5_SSADH_GabD, Mitochondrial succinate-semialdehyde dehydrogenase and ALDH family members 5A1 and 5F1-like. Succinate-semialdehyde dehydrogenase, mitochondrial (SSADH, GabD, EC=1.2.1.24) catalyzes the NAD+-dependent oxidation of succinate semialdehyde (SSA) to succinate. This group includes the human aldehyde dehydrogenase family 5 member A1 (ALDH5A1) which is a mitochondrial homote…	pfam00171, Aldedh, Aldehyde dehydrogenase family. This family of dehydrogenases act on aldehyde substrates. Members use NADP as a cofactor. The family includes the following members: The prototypical members are the aldehyde dehydrogenases EC:1.2.1.3. Succinate-semialdehyde dehydrogenase EC:1.2.1.16. Lactaldehyde dehydrogenase EC:1.2.1.22. Benzaldehyde dehydrogenase EC:1.2.1.28. Methylmalonate-se…	-	KOG2451, KOG2451, KOG2451, Aldehyde dehydrogenase [Energy production and conversion]. 2.15e-120	sp|P25526|GABD_ECOLI Succinate-semialdehyde dehydrogenase [NADP(+)] GabD OS=Escherichia coli (strain K12) GN=gabD PE=1 SV=1 3.32e-118	-	CAE1308977.1 ALDH5A1 [Sepia pharaonis] 1.22e-134	-
TRINITY_DN12041_c0_g1	2.20936	34.0071	-3.94414	3.58105e-10	8.31864e-08	down	cd14098, STKc_Rad53_Cds1, Catalytic domain of the yeast Serine/Threonine Kinases, Rad53 and Cds1. STKs catalyze the transfer of the gamma-phosphoryl group from ATP to serine/threonine residues on protein substrates. Rad53 and Cds1 are the checkpoint kinase 2 (Chk2) homologs found in budding and fission yeast, respectively. They play a central role in the cell's response to DNA lesions to prevent …	pfam06985, HET, Heterokaryon incompatibility protein (HET). This family represents a conserved region approximately 150 residues long within various heterokaryon incompatibility proteins that seem to be restricted to ascomycete fungi. Genetic differences in specific het genes prevent a viable heterokaryotic fungal cell from being formed by the fusion of filaments from two different wild-type stra…	-	KOG0599, KOG0599, KOG0599, Phosphorylase kinase gamma subunit [Carbohydrate transport and metabolism]. 2.90e-08	sp|Q54PB4|MYLKE_DICDI Probable myosin light chain kinase DDB_G0284661 OS=Dictyostelium discoideum GN=DDB_G0284661 PE=3 SV=1 2.06e-08	-	KAI1693513.1 heterokaryon incompatibility protein (HET) domain-containing protein [Ditylenchus destructor] 2.45e-24	-
TRINITY_DN12045_c0_g1	9.75965	43.4444	-2.15427	0.000698319	0.0129368	down	-	-	-	-	-	-	-	-
TRINITY_DN12047_c0_g1	0.335054	3.44726	-3.36298	1.34885e-05	0.000593682	down	-	pfam12051, DUF3533, Protein of unknown function (DUF3533). This family of transmembrane proteins is functionally uncharacterized. This protein is found in bacteria and eukaryotes. Proteins in this family are typically between 393 to 772 amino acids in length. 1.22e-52	-	-	sp|P46950|SNG1_YEAST Nitrosoguanidine resistance protein SNG1 OS=Saccharomyces cerevisiae (strain ATCC 204508 / S288c) GN=SNG1 PE=1 SV=1 3.41e-23	GO:0000322, storage vacuole;GO:0000323, lytic vacuole;GO:0000324, fungal-type vacuole;GO:0005575, cellular_component;GO:0005622, intracellular;GO:0005623, cell;GO:0005737, cytoplasm;GO:0005773, vacuole;GO:0005783, endoplasmic reticulum;GO:0005886, plasma membrane;GO:0006810, transport;GO:0008150, biological_process;GO:0009987, cellular process;GO:0012505, endomembrane system;GO:0015931, nucleobas…	CAF1622071.1 unnamed protein product [Adineta ricciae] 5.88e-09	-
TRINITY_DN12048_c0_g1	19.7834	94.0559	-2.24923	0.000313126	0.00718071	down	-	-	-	-	-	-	-	-
TRINITY_DN12051_c0_g1	21.2561	70.4325	-1.72836	0.000170835	0.00454016	down	cd02140, Frm2-like, nitroreductase family protein. A subfamily of the nitroreductase family containing uncharacterized proteins that are similar to nitroreductase. Nitroreductase catalyzes the reduction of nitroaromatic compounds such as nitrotoluenes, nitrofurans and nitroimidazoles. This process requires NAD(P)H as electron donor in an obligatory two-electron transfer and uses FMN as cofactor. …	-	-	-	sp|Q96VH4|HBN1_YEAST Putative nitroreductase HBN1 OS=Saccharomyces cerevisiae (strain ATCC 204508 / S288c) GN=HBN1 PE=1 SV=1 1.32e-08	-	KAF5276436.1 hypothetical protein FQR65_LT16329 [Abscondita terminalis] 5.44e-09	-
TRINITY_DN12054_c0_g1	4.22434	20.4372	-2.27439	6.99395e-05	0.00220988	down	-	pfam06985, HET, Heterokaryon incompatibility protein (HET). This family represents a conserved region approximately 150 residues long within various heterokaryon incompatibility proteins that seem to be restricted to ascomycete fungi. Genetic differences in specific het genes prevent a viable heterokaryotic fungal cell from being formed by the fusion of filaments from two different wild-type stra…	-	-	sp|Q9UV10|HET6_NEUCR Heterokaryon incompatibility protein 6, OR allele OS=Neurospora crassa (strain ATCC 24698 / 74-OR23-1A / CBS 708.71 / DSM 1257 / FGSC 987) GN=het-6 PE=4 SV=1 5.31e-14	-	KAI1691421.1 heterokaryon incompatibility protein (HET) domain-containing protein [Ditylenchus destructor] 5.09e-07	-
TRINITY_DN12061_c0_g1	4.24062	11.7342	-1.46837	0.00181001	0.0267638	down	-	-	-	-	sp|P07272|PPR1_YEAST Pyrimidine pathway regulatory protein 1 OS=Saccharomyces cerevisiae (strain ATCC 204508 / S288c) GN=PPR1 PE=1 SV=1 2.65e-13	-	-	-
TRINITY_DN12086_c0_g1	12.2941	3.05643	2.00805	0.000280932	0.00664291	up	-	-	-	-	sp|Q8CCN1|NAL10_MOUSE NACHT, LRR and PYD domains-containing protein 10 OS=Mus musculus GN=Nlrp10 PE=1 SV=1 6.29e-09	-	CAF1505087.1 unnamed protein product [Adineta steineri] >CAF3762879.1 unnamed protein product [Adineta steineri] 4.62e-38	-
TRINITY_DN12093_c0_g1	2.23013	22.0589	-3.30617	4.03493e-08	4.65096e-06	down	cd05374, 17beta-HSD-like_SDR_c, 17beta hydroxysteroid dehydrogenase-like, classical (c) SDRs. 17beta-hydroxysteroid dehydrogenases are a group of isozymes that catalyze activation and inactivation of estrogen and androgens. SDRs are a functionally diverse family of oxidoreductases that have a single domain with a structurally conserved Rossmann fold (alpha/beta folding pattern with a central beta…	pfam00106, adh_short, short chain dehydrogenase. This family contains a wide variety of dehydrogenases. 3.14e-21	-	KOG1205, KOG1205, KOG1205, Predicted dehydrogenase [Secondary metabolites biosynthesis, transport and catabolism]. 1.82e-27	sp|O74628|YQ53_SCHPO Uncharacterized oxidoreductase C162.03 OS=Schizosaccharomyces pombe (strain 972 / ATCC 24843) GN=SPCC162.03 PE=3 SV=1 1.18e-50	-	KAG4069203.1 hypothetical protein HA402_012056 [Bradysia odoriphaga] 5.64e-40	-
TRINITY_DN12118_c0_g1	48.8555	13.3984	1.86646	0.00330052	0.0397733	up	-	-	-	-	-	-	-	-
TRINITY_DN12139_c0_g1	53.9103	308.345	-2.51591	2.11013e-06	0.000129119	down	-	-	-	-	-	-	-	-
TRINITY_DN12150_c0_g1	218.449	526.329	-1.26867	0.000623191	0.0120637	down	cd03312, CIMS_N_terminal_like, CIMS - Cobalamine-independent methonine synthase, or MetE, N-terminal domain_like. Many members have been characterized as 5-methyltetrahydropteroyltriglutamate-homocysteine methyltransferases, EC:2.1.1.14, mostly from bacteria and plants. This enzyme catalyses the last step in the production of methionine by transferring a methyl group from 5-methyltetrahydrofolate…	pfam01717, Meth_synt_2, Cobalamin-independent synthase, Catalytic domain. This is a family of vitamin-B12 independent methionine synthases or 5-methyltetrahydropteroyltriglutamate--homocysteine methyltransferases, EC:2.1.1.14 from bacteria and plants. Plants are the only higher eukaryotes that have the required enzymes for methionine synthesis. This enzyme catalyzes the last step in the productio…	K00549-ko01230 Biosynthesis of amino acids;ko00270 Cysteine and methionine metabolism;ko00450 Selenocompound metabolism	KOG2263, KOG2263, KOG2263, Methionine synthase II (cobalamin-independent) [Amino acid transport and metabolism]. 0.0	sp|Q9UT19|METE_SCHPO Probable 5-methyltetrahydropteroyltriglutamate--homocysteine methyltransferase OS=Schizosaccharomyces pombe (strain 972 / ATCC 24843) GN=met26 PE=1 SV=1 0.0	GO:0000096, sulfur amino acid metabolic process;GO:0000097, sulfur amino acid biosynthetic process;GO:0003674, molecular_function;GO:0003824, catalytic activity;GO:0003871, 5-methyltetrahydropteroyltriglutamate-homocysteine S-methyltransferase activity;GO:0005488, binding;GO:0005575, cellular_component;GO:0005576, extracellular region;GO:0005618, cell wall;GO:0005622, intracellular;GO:0005623, ce…	RWS10232.1 5-methyltetrahydropteroyltriglutamate--homocysteine S-methyltransferase-like protein [Dinothrombium tinctorium] 1.52e-228	-
TRINITY_DN12159_c0_g1	122.673	31.7515	1.94992	0.000420263	0.00893523	up	cd04188, DPG_synthase, DPG_synthase is involved in protein N-linked glycosylation. UDP-glucose:dolichyl-phosphate glucosyltransferase (DPG_synthase) is a transmembrane-bound enzyme of the endoplasmic reticulum involved in protein N-linked glycosylation. This enzyme catalyzes the transfer of glucose from UDP-glucose to dolichyl phosphate. 4.55e-50	pfam08491, SE, Squalene epoxidase. This domain is found in squalene epoxidase (SE) and related proteins which are found in taxonomically diverse groups of eukaryotes and also in bacteria. SE was first cloned from Saccharomyces cerevisiae where it was named ERG1. It contains a putative FAD binding site and is a key enzyme in the sterol biosynthetic pathway. Putative transmembrane regions are found…	K00511-ko00100 Steroid biosynthesis;ko00909 Sesquiterpenoid and triterpenoid biosynthesis	KOG1298, KOG1298, KOG1298, Squalene monooxygenase [Lipid transport and metabolism]. 7.13e-92	sp|Q92206|ERG1_CANAL Squalene monooxygenase OS=Candida albicans (strain SC5314 / ATCC MYA-2876) GN=ERG1 PE=3 SV=1 3.21e-99	GO:0003674, molecular_function;GO:0003824, catalytic activity;GO:0004497, monooxygenase activity;GO:0004506, squalene monooxygenase activity;GO:0005488, binding;GO:0005575, cellular_component;GO:0005622, intracellular;GO:0005623, cell;GO:0005737, cytoplasm;GO:0005783, endoplasmic reticulum;GO:0005789, endoplasmic reticulum membrane;GO:0005811, lipid droplet;GO:0005886, plasma membrane;GO:0006066,…	KAJ3021857.1 Squalene epoxidase [Siphonaria sp. JEL0065] 2.56e-105	-
TRINITY_DN12160_c0_g1	4.16152	14.8923	-1.83938	1.33494e-05	0.00058963	down	cd14940, 7tmE_cAMP_R_Slime_mold, slime mold cyclic AMP receptor, member of the class E family of seven-transmembrane G protein-coupled receptors. This family represents the class E of seven-transmembrane G-protein coupled receptors found in soil-living amoebas, commonly referred to as slime molds. The class E family includes cAMP receptors (cAR1-4) and cAMP receptors-like proteins (CrlA-C) from D…	pfam05462, Dicty_CAR, Slime mold cyclic AMP receptor. This family consists of cyclic AMP receptor (CAR) proteins from slime molds. CAR proteins are responsible for controlling development in Dictyostelium discoideum. 3.48e-11	-	-	sp|Q54U75|CRLA_DICDI Cyclic AMP receptor-like protein A OS=Dictyostelium discoideum GN=crlA PE=2 SV=1 6.53e-10	-	XP_041482710.1 cyclic AMP receptor-like protein A isoform X2 [Lytechinus variegatus] 2.16e-15	-
TRINITY_DN12171_c0_g1	1.51443	9.65391	-2.67233	0.000167923	0.00448176	down	cd05327, retinol-DH_like_SDR_c_like, retinol dehydrogenase (retinol-DH), Light dependent Protochlorophyllide (Pchlide) OxidoReductase (LPOR) and related proteins, classical (c) SDRs. Classical SDR subgroup containing retinol-DHs, LPORs, and related proteins. Retinol is processed by a medium chain alcohol dehydrogenase followed by retinol-DHs. Pchlide reductases act in chlorophyll biosynthesis. Th…	pfam05577, Peptidase_S28, Serine carboxypeptidase S28. These serine proteases include several eukaryotic enzymes such as lysosomal Pro-X carboxypeptidase, dipeptidyl-peptidase II, and thymus-specific serine peptidase. 3.66e-19	-	KOG1208, KOG1208, KOG1208, Dehydrogenases with different specificities (related to short-chain alcohol dehydrogenases) [Secondary metabolites biosynthesis, transport and catabolism]. 1.89e-39	sp|Q6RVV4|TIC32_PEA Short-chain dehydrogenase TIC 32, chloroplastic OS=Pisum sativum GN=TIC32 PE=1 SV=1 3.76e-36	-	XP_039255571.1 retinol dehydrogenase 13-like [Styela clava] 9.63e-44	-
TRINITY_DN12182_c0_g1	0.765613	3.81568	-2.31725	0.000736603	0.0134107	down	cd17323, MFS_Tpo1_MDR_like, Yeast Polyamine transporter 1 (Tpo1) and similar multidrug resistance (MDR) transporters of the Major Facilitator Superfamily. This family is composed of fungal multidrug resistance (MDR) transporters including several proteins from Saccharomyces cerevisiae such as polyamine transporters 1-4 (Tpo1-4), quinidine resistance proteins 1-3 (Qdr1-3), dityrosine transporter 1…	-	-	-	sp|O94343|YHMA_SCHPO Uncharacterized MFS-type transporter C1271.10c OS=Schizosaccharomyces pombe (strain 972 / ATCC 24843) GN=SPBC1271.10c PE=1 SV=1 1.14e-31	-	KMQ81729.1 mfs transporter, partial [Lasius niger] 5.69e-30	-
TRINITY_DN122_c0_g1	4.63782	40.3671	-3.12166	7.35131e-06	0.000372102	down	cd00448, YjgF_YER057c_UK114_family, YjgF, YER057c, and UK114 belong to a large family of proteins present in bacteria, archaea, and eukaryotes with no definitive function. The conserved domain is similar in structure to chorismate mutase but there is no sequence similarity and no functional connection. Members of this family have been implicated in isoleucine (Yeo7, Ibm1, aldR) and purine (YjgF) …	-	-	-	sp|Q9KWS2|AMND_PSESP 2-aminomuconate deaminase OS=Pseudomonas sp. GN=amnD PE=1 SV=1 5.97e-08	-	MCL4137846.1 hypothetical protein [Idotea baltica] 6.15e-14	-
TRINITY_DN12221_c0_g1	18.6072	71.2208	-1.93644	0.0022795	0.031013	down	cd05259, PCBER_SDR_a, phenylcoumaran benzylic ether reductase (PCBER) like, atypical (a) SDRs. PCBER and pinoresinol-lariciresinol reductases are NADPH-dependent aromatic alcohol reductases, and are atypical members of the SDR family. Other proteins in this subgroup are identified as eugenol synthase. These proteins contain an N-terminus characteristic of NAD(P)-binding proteins and a small C-ter…	pfam14420, Clr5, Clr5 domain. This domain is found at the N-terminus of the Clr5 protein which has been shown to be involved in silencing in fission yeast. This domain has been found to often be associated with proteins that contain ankyrin repeats and large regions of disordered sequence. 4.94e-06	-	-	-	-	CAF1273488.1 unnamed protein product [Adineta steineri] >CAF3637184.1 unnamed protein product [Adineta steineri] 7.19e-37	-
TRINITY_DN12229_c0_g1	9.44474	1.62876	2.53573	2.10177e-05	0.000850472	up	-	-	-	-	-	-	-	-
TRINITY_DN12237_c0_g1	7.8605	63.5478	-3.01515	1.80123e-05	0.000758207	down	-	-	-	-	-	GO:0000278, mitotic cell cycle;GO:0000281, mitotic cytokinesis;GO:0000910, cytokinesis;GO:0003674, molecular_function;GO:0005488, binding;GO:0007049, cell cycle;GO:0007275, multicellular organism development;GO:0008061, chitin binding;GO:0008144, drug binding;GO:0008150, biological_process;GO:0009790, embryo development;GO:0009792, embryo development ending in birth or egg hatching;GO:0009987, ce…	-	-
TRINITY_DN12251_c0_g1	3.58197	20.6063	-2.52426	1.52218e-07	1.41438e-05	down	-	pfam01619, Pro_dh, Proline dehydrogenase. 2.35e-11	-	KOG0186, KOG0186, KOG0186, Proline oxidase [Amino acid transport and metabolism]. 5.36e-34	sp|O74524|PROD_SCHPO Probable proline dehydrogenase, mitochondrial OS=Schizosaccharomyces pombe (strain 972 / ATCC 24843) GN=SPCC70.03c PE=3 SV=1 2.27e-32	-	XP_039275162.1 LOW QUALITY PROTEIN: hydroxyproline dehydrogenase-like [Nilaparvata lugens] 2.88e-63	-
TRINITY_DN12254_c0_g1	25.6849	91.8292	-1.83803	1.20928e-06	8.24412e-05	down	-	pfam06441, EHN, Epoxide hydrolase N-terminus. This family represents the N-terminal region of the eukaryotic epoxide hydrolase protein. Epoxide hydrolases (EC:3.3.2.3) comprise a group of functionally related enzymes that catalyze the addition of water to oxirane compounds (epoxides), thereby usually generating vicinal trans-diols. EHs have been found in all types of living organisms, including m…	-	KOG2565, KOG2565, KOG2565, Predicted hydrolases or acyltransferases (alpha/beta hydrolase superfamily) [General function prediction only]. 1.16e-47	sp|Q06816|HYEP_STIAD Putative epoxide hydrolase OS=Stigmatella aurantiaca (strain DW4/3-1) GN=STAUR_4299 PE=3 SV=2 1.91e-76	-	CAF0927265.1 unnamed protein product [Rotaria sordida] >CAF0979160.1 unnamed protein product [Rotaria sordida] 2.34e-79	-
TRINITY_DN12266_c0_g1	14.6368	4.58051	1.67602	0.003108	0.0382223	up	-	-	-	-	-	-	-	-
TRINITY_DN12268_c0_g1	56.1928	224.554	-1.99861	4.95541e-05	0.00170303	down	cd17639, LC_FACS_euk1, Eukaryotic long-chain fatty acid CoA synthetase (LC-FACS), including fungal proteins. The members of this family are eukaryotic fatty acid CoA synthetases (EC 6.2.1.3) that activate fatty acids with chain lengths of 12 to 20 and includes fungal proteins. They act on a wide range of long-chain saturated and unsaturated fatty acids, but the enzymes from different tissues show…	pfam00501, AMP-binding, AMP-binding enzyme. 3.63e-22	K11839-ko04144 Endocytosis	KOG1180, KOG1180, KOG1180, Acyl-CoA synthetase [Lipid transport and metabolism]. 1.20e-149	sp|P30624|LCF1_YEAST Long-chain-fatty-acid--CoA ligase 1 OS=Saccharomyces cerevisiae (strain ATCC 204508 / S288c) GN=FAA1 PE=1 SV=1 1.78e-153	GO:0000131, incipient cellular bud site;GO:0000502, proteasome complex;GO:0002039, p53 binding;GO:0003674, molecular_function;GO:0003824, catalytic activity;GO:0004175, endopeptidase activity;GO:0004197, cysteine-type endopeptidase activity;GO:0004843, thiol-dependent ubiquitin-specific protease activity;GO:0005488, binding;GO:0005515, protein binding;GO:0005575, cellular_component;GO:0005622, in…	KAJ3029378.1 long-chain fatty acid-CoA ligase [Siphonaria sp. JEL0065] 1.18e-153	-
TRINITY_DN12281_c0_g1	9.04964	1.86451	2.27906	0.00439107	0.0474137	up	-	pfam00324, AA_permease, Amino acid permease. 2.41e-67	-	KOG1286, KOG1286, KOG1286, Amino acid transporters [Amino acid transport and metabolism]. 1.90e-81	sp|P43548|AGP3_YEAST General amino acid permease AGP3 OS=Saccharomyces cerevisiae (strain ATCC 204508 / S288c) GN=AGP3 PE=1 SV=1 0.0	GO:0003333, amino acid transmembrane transport;GO:0003674, molecular_function;GO:0005215, transporter activity;GO:0005342, organic acid transmembrane transporter activity;GO:0005575, cellular_component;GO:0005622, intracellular;GO:0005623, cell;GO:0005737, cytoplasm;GO:0005783, endoplasmic reticulum;GO:0005886, plasma membrane;GO:0006810, transport;GO:0006811, ion transport;GO:0006812, cation tra…	CAF1141514.1 unnamed protein product [Adineta steineri] >CAF3997107.1 unnamed protein product [Adineta steineri] 2.67e-155	-
TRINITY_DN12282_c0_g1	88.5755	27.4555	1.68981	0.00237979	0.0319918	up	cd02021, GntK, Gluconate kinase (GntK) catalyzes the phosphoryl transfer from ATP to gluconate. The resulting product gluconate-6-phoshate is an important precursor of gluconate metabolism. GntK acts as a dimmer composed of two identical subunits. 6.61e-48	-	K00851-ko00030 Pentose phosphate pathway;ko01200 Carbon metabolism	KOG3354, KOG3354, KOG3354, Gluconate kinase [Carbohydrate transport and metabolism]. 4.03e-42	sp|Q10242|GNTK_SCHPO Probable gluconokinase OS=Schizosaccharomyces pombe (strain 972 / ATCC 24843) GN=SPAC4G9.12 PE=3 SV=1 1.60e-50	-	XP_006626672.1 PREDICTED: probable gluconokinase [Lepisosteus oculatus] 1.58e-36	-
TRINITY_DN12282_c0_g2	56.9206	12.3984	2.19879	0.000635494	0.0121755	up	-	-	-	-	-	-	-	-
TRINITY_DN12288_c0_g1	50.5616	10.883	2.21597	0.000168701	0.00449296	up	cd02086, P-type_ATPase_Na_ENA, fungal-type Na(+)-ATPase, similar to the plasma membrane sodium transporters Saccharomyces cerevisiae Ena1p, Ena2p and Ustilago maydis Ena1, and the endoplasmic reticulum sodium transporter Ustilago maydis Ena2. Fungal-type Na(+)-ATPase (also called ENA ATPases). This subfamily includes the Saccharomyces cerevisiae plasma membrane transporters: Na(+)/Li(+)-exporting…	pfam00122, E1-E2_ATPase, E1-E2 ATPase. 1.05e-22	-	KOG0202, KOG0202, KOG0202, Ca2+ transporting ATPase [Inorganic ion transport and metabolism]. 1.92e-156	sp|Q12691|ATN5_YEAST Sodium transport ATPase 5 OS=Saccharomyces cerevisiae (strain ATCC 204508 / S288c) GN=ENA5 PE=1 SV=1 0.0	GO:0000322, storage vacuole;GO:0000323, lytic vacuole;GO:0000324, fungal-type vacuole;GO:0003674, molecular_function;GO:0003824, catalytic activity;GO:0005215, transporter activity;GO:0005388, calcium-transporting ATPase activity;GO:0005575, cellular_component;GO:0005622, intracellular;GO:0005623, cell;GO:0005737, cytoplasm;GO:0005739, mitochondrion;GO:0005773, vacuole;GO:0005886, plasma membrane…	XP_049849929.1 uncharacterized protein LOC126320473 isoform X2 [Schistocerca gregaria] >XP_049849930.1 uncharacterized protein LOC126320473 isoform X2 [Schistocerca gregaria] 1.38e-184	-
TRINITY_DN12298_c0_g1	1.99023	4.94199	-1.31216	0.0021555	0.0299431	down	cd07143, ALDH_AldA_AN0554, Aspergillus nidulans aldehyde dehydrogenase, AldA (AN0554)-like. NAD(P)+-dependent aldehyde dehydrogenase (AldA) of Aspergillus nidulans (locus AN0554), and other similar sequences, are present in this CD. 1.80e-139	pfam00171, Aldedh, Aldehyde dehydrogenase family. This family of dehydrogenases act on aldehyde substrates. Members use NADP as a cofactor. The family includes the following members: The prototypical members are the aldehyde dehydrogenases EC:1.2.1.3. Succinate-semialdehyde dehydrogenase EC:1.2.1.16. Lactaldehyde dehydrogenase EC:1.2.1.22. Benzaldehyde dehydrogenase EC:1.2.1.28. Methylmalonate-se…	K00128-ko00903 Limonene and pinene degradation;ko00330 Arginine and proline metabolism;ko00280 Valine, leucine and isoleucine degradation;ko00310 Lysine degradation;ko00625 Chloroalkane and chloroalkene degradation;ko00561 Glycerolipid metabolism;ko00620 Pyruvate metabolism;ko00410 beta-Alanine metabolism;ko00040 Pentose and glucuronate interconversions;ko00071 Fatty acid degradation;ko00380 Tryp…	KOG2450, KOG2450, KOG2450, Aldehyde dehydrogenase [Energy production and conversion]. 5.04e-137	sp|O74187|ALDH_AGABI Aldehyde dehydrogenase OS=Agaricus bisporus GN=aldA PE=3 SV=1 2.11e-126	-	XP_034237774.1 retinal dehydrogenase 1 [Thrips palmi] 5.02e-141	-
TRINITY_DN12299_c0_g1	18.1672	3.21629	2.49786	0.000781297	0.0140209	up	sd00045, ANK, ankyrin repeats. Ankyrin repeats are one of the most abundant repeat motifs, and generally function as scaffolds for protein-protein interactions in processes including cell cycle, transcriptional regulation, signal transduction, vesicular trafficking, and inflammatory response. Although predominantly found in eukaryotic proteins, they are also found in some bacterial and viral prot…	-	-	KOG4177, KOG4177, KOG4177, Ankyrin [Cell wall/membrane/envelope biogenesis]. 2.10e-09	sp|P16157|ANK1_HUMAN Ankyrin-1 OS=Homo sapiens GN=ANK1 PE=1 SV=3 8.51e-11	-	XP_045470541.1 serine/threonine-protein phosphatase 6 regulatory ankyrin repeat subunit B-like [Harmonia axyridis] 3.75e-15	-
TRINITY_DN12303_c0_g1	12.7326	25.839	-1.02103	0.00195415	0.0280789	down	-	-	-	-	-	-	-	-
TRINITY_DN12309_c0_g1	0.420315	3.05935	-2.86368	0.000411201	0.0087723	down	-	pfam09994, DUF2235, Uncharacterized alpha/beta hydrolase domain (DUF2235). This domain, found in various hypothetical bacterial proteins, has no known function. 1.46e-32	-	-	sp|P39992|YEC3_YEAST Uncharacterized protein YEL023C OS=Saccharomyces cerevisiae (strain ATCC 204508 / S288c) GN=YEL023C PE=4 SV=1 7.42e-09	-	KAJ3003805.1 hypothetical protein HDU68_005497 [Siphonaria sp. JEL0065] 3.38e-20	-
TRINITY_DN12310_c0_g3	15.0114	1.63507	3.19863	6.42414e-05	0.00209387	up	-	-	-	-	-	-	-	-
TRINITY_DN12317_c0_g1	362.891	1095.87	-1.59446	0.000141943	0.00388762	down	cd03221, ABCF_EF-3, ATP-binding cassette domain of elongation factor 3, subfamily F. Elongation factor 3 (EF-3) is a cytosolic protein required by fungal ribosomes for in vitro protein synthesis and for in vivo growth. EF-3 stimulates the binding of the EF-1: GTP: aa-tRNA ternary complex to the ribosomal A site by facilitated release of the deacylated tRNA from the E site. The reaction requires A…	pfam12848, ABC_tran_Xtn, ABC transporter. This domain is an extension of some members of pfam00005 and other ABC-transporter families. 1.18e-08	-	KOG0927, KOG0927, KOG0927, Predicted transporter (ABC superfamily) [General function prediction only]. 1.77e-09	sp|P40024|ARB1_YEAST ABC transporter ATP-binding protein ARB1 OS=Saccharomyces cerevisiae (strain ATCC 204508 / S288c) GN=ARB1 PE=1 SV=1 0.0	GO:0000054, ribosomal subunit export from nucleus;GO:0000056, ribosomal small subunit export from nucleus;GO:0003674, molecular_function;GO:0003824, catalytic activity;GO:0005575, cellular_component;GO:0005622, intracellular;GO:0005623, cell;GO:0005634, nucleus;GO:0005737, cytoplasm;GO:0006403, RNA localization;GO:0006405, RNA export from nucleus;GO:0006611, protein export from nucleus;GO:0006810…	KAJ3024488.1 hypothetical protein HDU68_008116 [Siphonaria sp. JEL0065] 2.06e-200	-
TRINITY_DN12321_c0_g1	10.6283	31.9857	-1.58951	1.99063e-05	0.000818703	down	cd02076, P-type_ATPase_H, plant and fungal plasma membrane H(+)-ATPases, and related bacterial and archaeal putative H(+)-ATPases. This subfamily includes eukaryotic plasma membrane H(+)-ATPase which transports H(+) from the cytosol to the extracellular space, thus energizing the plasma membrane for the uptake of ions and nutrients, and is expressed in plants and fungi. This H(+)-ATPase consists …	pfam08546, ApbA_C, Ketopantoate reductase PanE/ApbA C terminal. This is a family of 2-dehydropantoate 2-reductases also known as ketopantoate reductases, EC:1.1.1.169. The reaction catalyzed by this enzyme is: (R)-pantoate + NADP(+) <=> 2-dehydropantoate + NADPH. AbpA catalyzes the NADPH reduction of ketopantoic acid to pantoic acid in the alternative pyrimidine biosynthetic (APB) pathway. ApbA a…	K01535-ko00190 Oxidative phosphorylation	KOG0205, KOG0205, KOG0205, Plasma membrane H+-transporting ATPase [Inorganic ion transport and metabolism]. 1.07e-12	sp|P19657|PMA2_YEAST Plasma membrane ATPase 2 OS=Saccharomyces cerevisiae (strain ATCC 204508 / S288c) GN=PMA2 PE=1 SV=3 0.0	-	KAJ3020750.1 hypothetical protein HDU68_009987 [Siphonaria sp. JEL0065] 9.24e-125	-
TRINITY_DN12324_c0_g1	10.6029	23.5827	-1.15327	0.00107195	0.0179343	down	cd06179, MFS_TRI12_like, Fungal trichothecene efflux pump (TRI12) of the Major Facilitator Superfamily of transporters. This family includes Fusarium sporotrichioides trichothecene efflux pump (TRI12), which may play a role in F. sporotrichioides self-protection against trichothecenes. TRI12 belongs to the Major Facilitator Superfamily (MFS) of membrane transport proteins, which are thought to fu…	-	-	-	sp|P38358|VBA2_YEAST Vacuolar basic amino acid transporter 2 OS=Saccharomyces cerevisiae (strain ATCC 204508 / S288c) GN=VBA2 PE=1 SV=1 2.38e-06	-	KAJ3010587.1 hypothetical protein HDU68_002075 [Siphonaria sp. JEL0065] 3.04e-08	-
TRINITY_DN12334_c0_g1	36.45	7.74852	2.23393	0.00110213	0.0183115	up	sd00045, ANK, ankyrin repeats. Ankyrin repeats are one of the most abundant repeat motifs, and generally function as scaffolds for protein-protein interactions in processes including cell cycle, transcriptional regulation, signal transduction, vesicular trafficking, and inflammatory response. Although predominantly found in eukaryotic proteins, they are also found in some bacterial and viral prot…	pfam12796, Ank_2, Ankyrin repeats (3 copies). 1.24e-08	-	KOG0508, KOG0508, KOG0508, Ankyrin repeat protein [General function prediction only]. 9.02e-08	sp|Q9ULJ7|ANR50_HUMAN Ankyrin repeat domain-containing protein 50 OS=Homo sapiens GN=ANKRD50 PE=1 SV=4 4.19e-09	-	KAI1694588.1 phosphorylase superfamily domain-containing protein [Ditylenchus destructor] 2.22e-30	-
TRINITY_DN12338_c0_g1	1.74454	6.9545	-1.9951	0.00301153	0.0375514	down	-	-	-	-	-	-	-	-
TRINITY_DN12345_c0_g1	15.0097	60.6746	-2.0152	0.00179364	0.0266581	down	-	-	-	-	sp|Q5BEJ5|AFOF_EMENI FAD-linked oxidoreductase afoF OS=Emericella nidulans (strain FGSC A4 / ATCC 38163 / CBS 112.46 / NRRL 194 / M139) GN=afoF PE=1 SV=1 2.58e-06	-	XP_044177859.1 FAD-linked oxidoreductase DDB_G0289697-like [Acropora millepora] 1.24e-12	-
TRINITY_DN12353_c0_g1	15.716	2.4527	2.67979	0.000175036	0.00463218	up	-	-	-	-	sp|Q59QC7|UPC2_CANAL Sterol uptake control protein 2 OS=Candida albicans (strain SC5314 / ATCC MYA-2876) GN=UPC2 PE=1 SV=1 6.66e-08	-	-	-
TRINITY_DN12354_c0_g1	27.6887	58.4301	-1.07742	0.000474316	0.0098507	down	cd13650, PBP2_THI5, Substrate binding domain of ABC-type transporters for thiamin biosynthetic pathway intermediates; a member of the type 2 periplasmic binding fold superfamily. ThiY is the periplasmic N-formyl-4-amino-5-(aminomethyl)-2-methylpyrimidine (FAMP) binding component of the ABC transport system (ThiXYZ). FAMP is imported into cell by the transporter, where it is then incorporated into…	pfam09084, NMT1, NMT1/THI5 like. This family contains the NMT1 and THI5 proteins. These proteins are proposed to be required for the biosynthesis of the pyrimidine moiety of thiamine. They are regulated by thiamine. The protein adopts a fold related to the periplasmic binding protein (PBP) family. Both pyridoxal-5'-phosphate (PLP) and an iron atom are bound to the protein suggesting numerous resi…	K18278-ko00730 Thiamine metabolism	-	sp|P42882|NMT1_ASPPA 4-amino-5-hydroxymethyl-2-methylpyrimidine phosphate synthase OS=Aspergillus parasiticus GN=nmt1 PE=2 SV=1 7.54e-28	GO:0003674, molecular_function;GO:0003824, catalytic activity;GO:0006725, cellular aromatic compound metabolic process;GO:0006766, vitamin metabolic process;GO:0006767, water-soluble vitamin metabolic process;GO:0006772, thiamine metabolic process;GO:0006790, sulfur compound metabolic process;GO:0006807, nitrogen compound metabolic process;GO:0008150, biological_process;GO:0008152, metabolic proc…	-	-
TRINITY_DN12364_c0_g2	3.10434	28.8345	-3.21544	1.68877e-05	0.000718099	down	-	-	-	-	-	-	-	-
TRINITY_DN12370_c0_g1	0.361455	2.27309	-2.65277	0.00130094	0.0208951	down	cd07564, nitrilases_CHs, Nitrilases, cyanide hydratase (CH)s, and similar proteins (class 1 nitrilases). Nitrilases (nitrile aminohydrolases, EC:3.5.5.1) hydrolyze nitriles (RCN) to ammonia and the corresponding carboxylic acid. Most nitrilases prefer aromatic nitriles, some prefer arylacetonitriles and others aliphatic nitriles. This group includes the nitrilase cyanide dihydratase (CDH), which …	-	-	-	sp|B6Q5I3|NIT_TALMQ Nitrilase OS=Talaromyces marneffei (strain ATCC 18224 / CBS 334.59 / QM 7333) GN=PMAA_032480 PE=1 SV=1 3.27e-17	-	MCL4127327.1 hypothetical protein [Idotea baltica] 1.28e-07	-
TRINITY_DN12372_c0_g1	416.096	81.7242	2.34808	3.30831e-05	0.00121344	up	cd19511, RecA-like_CDC48_r2-like, second of two ATPase domains of CDC48/p97, PEX1 and -6, VAT and NVL, and similar ATPase domains. This subfamily includes the second of two ATPase domains of the molecular chaperone CDC48 in yeast and p97 or VCP in metazoans, Peroxisomal biogenesis factor 1 (PEX1) and -6 (PEX6), Valosin-containing protein-like ATPase (VAT), and nuclear VCP-like protein (NVL). This…	-	-	KOG0730, KOG0730, KOG0730, AAA+-type ATPase [Posttranslational modification, protein turnover, chaperones]. 1.14e-14	sp|O34703|YJOB_BACSU Uncharacterized ATPase YjoB OS=Bacillus subtilis (strain 168) GN=yjoB PE=1 SV=1 1.40e-23	-	VDO21059.1 unnamed protein product [Haemonchus placei] 1.48e-08	-
TRINITY_DN12376_c0_g1	1.88472	5.4433	-1.53014	0.00429072	0.046884	down	-	pfam00561, Abhydrolase_1, alpha/beta hydrolase fold. This catalytic domain is found in a very wide range of enzymes. 1.18e-08	-	KOG2614, KOG2614, KOG2614, Kynurenine 3-monooxygenase and related flavoprotein monooxygenases [Energy production and conversion, General function prediction only]. 2.94e-16	sp|Q5EXK1|3HBH_KLEOX 3-hydroxybenzoate 6-hydroxylase OS=Klebsiella oxytoca GN=mhbM PE=1 SV=1 3.50e-18	-	CAF3976378.1 unnamed protein product [Adineta steineri] 3.13e-35	-
TRINITY_DN12377_c0_g1	65.7826	208.696	-1.66563	0.000951169	0.0162554	down	cd00340, GSH_Peroxidase, Glutathione (GSH) peroxidase family; tetrameric selenoenzymes that catalyze the reduction of a variety of hydroperoxides including lipid peroxidases, using GSH as a specific electron donor substrate. GSH peroxidase contains one selenocysteine residue per subunit, which is involved in catalysis. Different isoenzymes are known in mammals,which are involved in protection aga…	pfam00255, GSHPx, Glutathione peroxidase. 5.21e-33	K00432-ko00480 Glutathione metabolism;ko00590 Arachidonic acid metabolism;ko04918 Thyroid hormone synthesis	KOG1651, KOG1651, KOG1651, Glutathione peroxidase [Posttranslational modification, protein turnover, chaperones]. 8.57e-44	sp|P38143|GPX2_YEAST Glutathione peroxidase 2 OS=Saccharomyces cerevisiae (strain ATCC 204508 / S288c) GN=GPX2 PE=1 SV=1 1.97e-55	GO:0000302, response to reactive oxygen species;GO:0003674, molecular_function;GO:0003824, catalytic activity;GO:0004601, peroxidase activity;GO:0005575, cellular_component;GO:0005622, intracellular;GO:0005623, cell;GO:0005737, cytoplasm;GO:0005739, mitochondrion;GO:0005829, cytosol;GO:0006950, response to stress;GO:0006979, response to oxidative stress;GO:0008150, biological_process;GO:0008152, …	QRW45203.1 glutathione peroxidase, partial [Macrosiphum euphorbiae] 4.57e-56	Macrosiphum euphorbiae glutathione peroxidase (GPx) mRNA, partial cds 1.73e-38
TRINITY_DN12406_c0_g1	49.6057	15.6609	1.66334	0.00308322	0.0381043	up	cd19512, RecA-like_ATAD3-like, ATPase domains of ATPase AAA-domain protein 3A (ATAD3A), -3B, and -3C, and similar ATPase domains. ATPase AAA-domain protein 3 (ATAD3) is a ubiquitously expressed mitochondrial protein involved in mitochondrial dynamics, DNA-nucleoid structural organization, cholesterol transport and steroidogenesis. The ATAD3 gene family in human comprises three paralog genes: ATAD…	pfam05199, GMC_oxred_C, GMC oxidoreductase. This domain found associated with pfam00732. 1.53e-08	K00108-ko00260 Glycine, serine and threonine metabolism	KOG1238, KOG1238, KOG1238, Glucose dehydrogenase/choline dehydrogenase/mandelonitrile lyase (GMC oxidoreductase family) [General function prediction only]. 8.36e-33	sp|Q8BJ64|CHDH_MOUSE Choline dehydrogenase, mitochondrial OS=Mus musculus GN=Chdh PE=1 SV=1 2.48e-37	-	CAF0898614.1 unnamed protein product [Didymodactylos carnosus] >CAF3679753.1 unnamed protein product [Didymodactylos carnosus] 4.81e-83	-
TRINITY_DN12419_c0_g1	18.4348	59.1092	-1.68095	0.00378916	0.0434472	down	cd11061, CYP67-like, cytochrome P450 family 67 and similar cytochrome P450s. This subfamily includes Uromyces viciae-fabae cytochrome P450 67 (CYP67), also called planta-induced rust protein 16, Cystobasidium minutum (Rhodotorula minuta) cytochrome P450rm, and other fungal cytochrome P450s. P450rm catalyzes the formation of isobutene and 4-hydroxylation of benzoate. The gene encoding CYP67 is a p…	pfam00067, p450, Cytochrome P450. Cytochrome P450s are haem-thiolate proteins involved in the oxidative degradation of various compounds. They are particularly well known for their role in the degradation of environmental toxins and mutagens. They can be divided into 4 classes, according to the method by which electrons from NAD(P)H are delivered to the catalytic site. Sequence conservation is re…	-	KOG0157, KOG0157, KOG0157, Cytochrome P450 CYP4/CYP19/CYP26 subfamilies [Secondary metabolites biosynthesis, transport and catabolism, Lipid transport and metabolism]. 2.72e-19	sp|O00061|CP67_UROFA Cytochrome P450 67 (Fragment) OS=Uromyces fabae GN=CYP67 PE=2 SV=1 2.05e-32	-	XP_028400472.1 cholesterol 24-hydroxylase-like [Dendronephthya gigantea] 1.17e-15	-
TRINITY_DN12425_c0_g1	103.855	451.274	-2.11943	0.000406279	0.00868206	down	-	-	-	-	-	-	-	-
TRINITY_DN12439_c0_g1	0.942693	5.06825	-2.42663	1.32819e-05	0.000588721	down	cd01299, Met_dep_hydrolase_A, Metallo-dependent hydrolases, subgroup A is part of the superfamily of metallo-dependent hydrolases, a large group of proteins that show conservation in their 3-dimensional fold (TIM barrel) and in details of their active site. The vast majority of the members have a conserved metal binding site, involving four histidines and one aspartic acid residue. In the common …	-	-	-	-	-	KAG1647555.1 hypothetical protein GQR58_030500 [Nymphon striatum] 5.65e-11	-
TRINITY_DN12446_c0_g2	7.97508	30.6649	-1.94302	1.35274e-06	9.02597e-05	down	cd05327, retinol-DH_like_SDR_c_like, retinol dehydrogenase (retinol-DH), Light dependent Protochlorophyllide (Pchlide) OxidoReductase (LPOR) and related proteins, classical (c) SDRs. Classical SDR subgroup containing retinol-DHs, LPORs, and related proteins. Retinol is processed by a medium chain alcohol dehydrogenase followed by retinol-DHs. Pchlide reductases act in chlorophyll biosynthesis. Th…	pfam00106, adh_short, short chain dehydrogenase. This family contains a wide variety of dehydrogenases. 3.62e-10	-	KOG1208, KOG1208, KOG1208, Dehydrogenases with different specificities (related to short-chain alcohol dehydrogenases) [Secondary metabolites biosynthesis, transport and catabolism]. 7.77e-31	sp|Q6RVV4|TIC32_PEA Short-chain dehydrogenase TIC 32, chloroplastic OS=Pisum sativum GN=TIC32 PE=1 SV=1 8.33e-33	-	MCL4110189.1 hypothetical protein [Idotea baltica] 9.00e-52	-
TRINITY_DN12458_c0_g1	118.817	34.1496	1.79881	0.00352813	0.0417063	up	-	pfam12929, Mid1, Stretch-activated Ca2+-permeable channel component. MID1 is a yeast Saccharomyces cerevisiae gene encoding a plasma membrane protein required for Ca2+ influx induced by the mating pheromone, alpha-factor. Mid1 protein plays a crucial role in supplying Ca2+ during the mating process. Mid1 is composed of 548-amino-acid residues with four hydrophobic regions named H1, H2, H3 and H4,…	-	-	sp|Q10063|EHS1_SCHPO Calcium influx-promoting protein ehs1 OS=Schizosaccharomyces pombe (strain 972 / ATCC 24843) GN=ehs1 PE=3 SV=1 9.49e-56	-	-	-
TRINITY_DN12472_c0_g1	50.5963	140.764	-1.47618	0.0032883	0.0397384	down	-	-	-	-	-	-	-	-
TRINITY_DN12473_c0_g1	27.1344	126.885	-2.22533	0.00391761	0.0443026	down	cd00866, PEBP_euk, PhosphatidylEthanolamine-Binding Protein (PEBP) domain present in eukaryotes. PhosphatidylEthanolamine-Binding Proteins (PEBPs) are represented in all three major phylogenetic divisions (eukaryotes, bacteria, archaea). The members in this subgroup are present in eukaryotes. Members here include those in plants such as Arabidopsis thaliana FLOWERING LOCUS (FT) and TERMINAL FLOWE…	pfam08546, ApbA_C, Ketopantoate reductase PanE/ApbA C terminal. This is a family of 2-dehydropantoate 2-reductases also known as ketopantoate reductases, EC:1.1.1.169. The reaction catalyzed by this enzyme is: (R)-pantoate + NADP(+) <=> 2-dehydropantoate + NADPH. AbpA catalyzes the NADPH reduction of ketopantoic acid to pantoic acid in the alternative pyrimidine biosynthetic (APB) pathway. ApbA a…	-	KOG3346, KOG3346, KOG3346, Phosphatidylethanolamine binding protein [General function prediction only]. 4.37e-13	sp|Q07589|YD144_YEAST Uncharacterized protein YDL144C OS=Saccharomyces cerevisiae (strain ATCC 204508 / S288c) GN=YDL144C PE=1 SV=2 6.69e-51	GO:0005575, cellular_component;GO:0005622, intracellular;GO:0005623, cell;GO:0005634, nucleus;GO:0005737, cytoplasm;GO:0043226, organelle;GO:0043227, membrane-bounded organelle;GO:0043229, intracellular organelle;GO:0043231, intracellular membrane-bounded organelle;GO:0044424, intracellular part;GO:0044464, cell part	XP_050728714.1 protein D2-like [Eriocheir sinensis] >XP_050728715.1 protein D2-like [Eriocheir sinensis] >XP_050728716.1 protein D2-like [Eriocheir sinensis] >XP_050728717.1 protein D2-like [Eriocheir sinensis] >XP_050728718.1 protein D2-like [Eriocheir sinensis] 2.22e-20	-
TRINITY_DN12475_c0_g1	19.3348	1.43146	3.75564	9.41107e-11	2.62339e-08	up	cd00833, PKS, polyketide synthases (PKSs) polymerize simple fatty acids into a large variety of different products, called polyketides, by successive decarboxylating Claisen condensations. PKSs can be divided into 2 groups, modular type I PKSs consisting of one or more large multifunctional proteins and iterative type II PKSs, complexes of several monofunctional subunits. 8.00e-06	pfam00109, ketoacyl-synt, Beta-ketoacyl synthase, N-terminal domain. The structure of beta-ketoacyl synthase is similar to that of the thiolase family (pfam00108) and also chalcone synthase. The active site of beta-ketoacyl synthase is located between the N and C-terminal domains. The N-terminal domain contains most of the structures involved in dimer formation and also the active site cysteine. …	-	KOG1202, KOG1202, KOG1202, Animal-type fatty acid synthase and related proteins [Lipid transport and metabolism]. 4.42e-26	sp|Q3S2U6|MOKB_MONPI Lovastatin diketide synthase mokB OS=Monascus pilosus GN=mokB PE=1 SV=1 3.22e-120	-	CAF1243262.1 unnamed protein product, partial [Didymodactylos carnosus] >CAF4007497.1 unnamed protein product, partial [Didymodactylos carnosus] 4.37e-125	-
TRINITY_DN12508_c0_g2	10.2746	1.33673	2.94229	0.000804981	0.0143314	up	-	pfam17784, Sulfotransfer_4, Sulfotransferase domain. This family of proteins are distantly related to sulfotransferase enzymes. This protein in S. mansonii has been shown to be involved in resistance to oxamniquine and to have sulfotransferase activity. 2.07e-16	-	-	sp|Q4WRY5|LAEA_ASPFU Secondary metabolism regulator laeA OS=Neosartorya fumigata (strain ATCC MYA-4609 / Af293 / CBS 101355 / FGSC A1100) GN=laeA PE=2 SV=1 1.88e-33	-	XP_039274961.1 LOW QUALITY PROTEIN: methyltransferase pytC-like [Nilaparvata lugens] 2.29e-23	-
TRINITY_DN12518_c0_g1	45.0107	93.51	-1.05485	0.00123446	0.0199808	down	cd00398, Aldolase_II, Class II Aldolase and Adducin head (N-terminal) domain. Aldolases are ubiquitous enzymes catalyzing central steps of carbohydrate metabolism. Based on enzymatic mechanisms, this superfamily has been divided into two distinct classes (Class I and II). Class II enzymes are further divided into two sub-classes A and B. This family includes class II A aldolases and adducins whic…	pfam00596, Aldolase_II, Class II Aldolase and Adducin N-terminal domain. This family includes class II aldolases and adducins which have not been ascribed any enzymatic function. 2.63e-25	-	KOG3699, KOG3699, KOG3699, Cytoskeletal protein Adducin [Signal transduction mechanisms, Cytoskeleton]. 1.41e-10	sp|Q9L9F0|NOVR_STRNV Decarboxylase NovR OS=Streptomyces niveus GN=novR PE=1 SV=1 3.71e-53	-	MCL4125640.1 hypothetical protein [Idotea baltica] 1.36e-64	-
TRINITY_DN12545_c0_g1	31.3506	114.566	-1.86962	9.09922e-07	6.52232e-05	down	cd15028, 7tm_Opsin-1_euk, proton pumping rhodopsins in fungi and algae, member of the seven-transmembrane GPCR superfamily. This subgroup represents uncharacterized proton pumping rhodopsins found in fungi and algae. They belong to the microbial rhodopsin family, also known as type I rhodopsins, consisting of the light-driven inward chloride pump halorhodopsin (HR), the outward proton pump bacter…	pfam01036, Bac_rhodopsin, Bacteriorhodopsin-like protein. The bacterial opsins are retinal-binding proteins that provide light- dependent ion transport and sensory functions to a family of halophilic bacteria. They are integral membrane proteins believed to contain seven transmembrane (TM) domains, the last of which contains the attachment point for retinal (a conserved lysine). This family also …	-	-	sp|Q9UW81|NOP1_NEUCR Opsin-1 OS=Neurospora crassa (strain ATCC 24698 / 74-OR23-1A / CBS 708.71 / DSM 1257 / FGSC 987) GN=nop-1 PE=1 SV=1 1.50e-74	GO:0003674, molecular_function;GO:0005488, binding;GO:0005501, retinoid binding;GO:0005503, all-trans retinal binding;GO:0005575, cellular_component;GO:0005622, intracellular;GO:0005623, cell;GO:0005737, cytoplasm;GO:0005783, endoplasmic reticulum;GO:0005886, plasma membrane;GO:0008150, biological_process;GO:0008289, lipid binding;GO:0009314, response to radiation;GO:0009416, response to light st…	CAF1363965.1 unnamed protein product [Didymodactylos carnosus] >CAF1371774.1 unnamed protein product [Didymodactylos carnosus] >CAF4173566.1 unnamed protein product [Didymodactylos carnosus] >CAF4258907.1 unnamed protein product [Didymodactylos carnosus] 3.23e-26	-
TRINITY_DN12550_c0_g1	10.7898	2.53914	2.08725	0.00471617	0.0495889	up	cd00312, Esterase_lipase, Esterases and lipases (includes fungal lipases, cholinesterases, etc.) These enzymes act on carboxylic esters (EC: 3.1.1.-). The catalytic apparatus involves three residues (catalytic triad): a serine, a glutamate or aspartate and a histidine.These catalytic residues are responsible for the nucleophilic attack on the carbonyl carbon atom of the ester bond. In contrast wi…	pfam00135, COesterase, Carboxylesterase family. 1.25e-32	-	KOG4389, KOG4389, KOG4389, Acetylcholinesterase/Butyrylcholinesterase [Signal transduction mechanisms]. 4.40e-51	sp|P06276|CHLE_HUMAN Cholinesterase OS=Homo sapiens GN=BCHE PE=1 SV=1 3.06e-37	-	CAF2595072.1 unnamed protein product [Rotaria sp. Silwood2] >CAF2857658.1 unnamed protein product [Rotaria sp. Silwood2] >CAF4122515.1 unnamed protein product [Rotaria sp. Silwood2] >CAF4254213.1 unnamed protein product [Rotaria sp. Silwood2] 6.63e-55	-
TRINITY_DN12556_c0_g1	0.722201	2.28165	-1.6596	0.00262436	0.0340082	down	cd17327, MFS_FEN2_like, Pantothenate transporter FEN2 and similar transporters of the Major Facilitator Superfamily. This family is composed of Saccharomyces cerevisiae pantothenate transporter FEN2 (or fenpropimorph resistance protein 2) and similar proteins from fungi and bacteria including fungal vitamin H transporter, allantoate permease, and high-affinity nicotinic acid transporter, as well …	-	-	KOG2533, KOG2533, KOG2533, Permease of the major facilitator superfamily [Carbohydrate transport and metabolism]. 2.30e-56	sp|Q9P6J0|YHDC_SCHPO Uncharacterized transporter C1683.12 OS=Schizosaccharomyces pombe (strain 972 / ATCC 24843) GN=SPBC1683.12 PE=3 SV=1 2.72e-68	-	CAF1145905.1 unnamed protein product [Adineta steineri] >CAF3632570.1 unnamed protein product [Adineta steineri] 1.04e-93	-
TRINITY_DN12557_c0_g2	2.70151	6.05642	-1.1647	0.00187755	0.0275185	down	cd17356, MFS_HXT, Fungal Hexose transporter subfamily of the Major Facilitator Superfamily of transporters and similar proteins. The fungal hexose transporter (HXT) subfamily is comprised of functionally redundant proteins that function mainly in the transport of glucose, as well as other sugars such as galactose and fructose. Saccharomyces cerevisiae has 20 genes that encode proteins in this fam…	pfam00083, Sugar_tr, Sugar (and other) transporter. 2.25e-36	-	KOG0254, KOG0254, KOG0254, Predicted transporter (major facilitator superfamily) [General function prediction only]. 1.47e-40	sp|P53387|KHT2_KLULC Hexose transporter 2 OS=Kluyveromyces lactis GN=KHT2 PE=3 SV=1 2.29e-45	GO:0000322, storage vacuole;GO:0000323, lytic vacuole;GO:0000324, fungal-type vacuole;GO:0003674, molecular_function;GO:0005215, transporter activity;GO:0005342, organic acid transmembrane transporter activity;GO:0005351, carbohydrate:proton symporter activity;GO:0005353, fructose transmembrane transporter activity;GO:0005354, galactose transmembrane transporter activity;GO:0005355, glucose trans…	CAF1618865.1 unnamed protein product, partial [Adineta ricciae] 1.90e-55	-
TRINITY_DN12570_c0_g1	4.78648	1.14951	2.05795	0.000374237	0.00815006	up	cd00200, WD40, WD40 domain, found in a number of eukaryotic proteins that cover a wide variety of functions including adaptor/regulatory modules in signal transduction, pre-mRNA processing and cytoskeleton assembly; typically contains a GH dipeptide 11-24 residues from its N-terminus and the WD dipeptide at its C-terminus and is 40 residues long, hence the name WD40; between GH and WD lies a cons…	pfam18785, Inv-AAD, Invertebrate-AID/APOBEC-deaminase. A classical AID/APOBEC-like deaminases found in lophotrochozoans, echinoderms and cnidarians. 6.15e-52	-	KOG2029, KOG2029, KOG2029, Uncharacterized conserved protein [Function unknown]. 1.67e-06	sp|Q00808|HETE1_PODAS Vegetative incompatibility protein HET-E-1 OS=Podospora anserina GN=HET-E1 PE=3 SV=1 1.94e-09	-	XP_032750641.1 protein SERAC1 [Rattus rattus] 8.59e-20	-
TRINITY_DN12572_c0_g1	1.32299	6.78167	-2.35783	8.14685e-06	0.000405532	down	-	-	-	-	-	-	XP_013293858.1 hypothetical protein NECAME_19255, partial [Necator americanus] >ETN71631.1 hypothetical protein NECAME_19255, partial [Necator americanus] 4.45e-09	-
TRINITY_DN12575_c0_g1	1.39813	6.96031	-2.31565	8.76967e-05	0.00267007	down	-	pfam06985, HET, Heterokaryon incompatibility protein (HET). This family represents a conserved region approximately 150 residues long within various heterokaryon incompatibility proteins that seem to be restricted to ascomycete fungi. Genetic differences in specific het genes prevent a viable heterokaryotic fungal cell from being formed by the fusion of filaments from two different wild-type stra…	-	-	-	-	KAI1693513.1 heterokaryon incompatibility protein (HET) domain-containing protein [Ditylenchus destructor] 8.38e-38	-
TRINITY_DN12580_c0_g1	1.47266	6.50791	-2.14377	0.000321571	0.00733415	down	-	-	-	KOG0256, KOG0256, KOG0256, 1-aminocyclopropane-1-carboxylate synthase, and related proteins [Signal transduction mechanisms]. 1.40e-34	sp|A2AIG8|1A1L1_MOUSE 1-aminocyclopropane-1-carboxylate synthase-like protein 1 OS=Mus musculus GN=Accs PE=2 SV=1 5.98e-42	-	XP_028915075.1 1-aminocyclopropane-1-carboxylate synthase-like protein 1 [Ornithorhynchus anatinus] 1.57e-17	-
TRINITY_DN12596_c0_g1	27.7086	2.06994	3.74267	1.51086e-06	9.87301e-05	up	-	-	-	-	-	-	-	-
TRINITY_DN12621_c0_g1	12.2318	3.39775	1.84799	0.00168668	0.0254606	up	cd17421, MFS_MCT5, Monocarboxylate transporter 5 of the Major Facilitator Superfamily of transporters. Monocarboxylate transporter 5 (MCT5) is also called Solute carrier family 16 member 4 (SLC16A4). It is an orphan transporter expressed in the brain, muscle, liver, kidney, lung, ovary, placenta, and heart. It is a member of the monocarboxylate transporter (MCT) family, whose members include MCT1…	pfam03291, Pox_MCEL, mRNA capping enzyme. This family of enzymes are related to pfam03919. 5.45e-39	K00565-ko03015 mRNA surveillance pathway	KOG1975, KOG1975, KOG1975, mRNA cap methyltransferase [RNA processing and modification]. 6.54e-38	sp|A4R8D7|MCES_MAGO7 mRNA cap guanine-N7 methyltransferase OS=Magnaporthe oryzae (strain 70-15 / ATCC MYA-4617 / FGSC 8958) GN=ABD1 PE=3 SV=1 8.26e-165	GO:0000428, DNA-directed RNA polymerase complex;GO:0001510, RNA methylation;GO:0003674, molecular_function;GO:0003824, catalytic activity;GO:0004482, mRNA (guanine-N7-)-methyltransferase activity;GO:0005575, cellular_component;GO:0005622, intracellular;GO:0005623, cell;GO:0005634, nucleus;GO:0005654, nucleoplasm;GO:0005737, cytoplasm;GO:0005829, cytosol;GO:0005845, mRNA cap binding complex;GO:000…	XP_039301073.1 LOW QUALITY PROTEIN: mRNA cap guanine-N7 methyltransferase-like [Nilaparvata lugens] 8.95e-173	-
TRINITY_DN12632_c0_g1	17.9913	4.47962	2.00585	0.00157881	0.0243001	up	-	pfam00743, FMO-like, Flavin-binding monooxygenase-like. This family includes FMO proteins, cyclohexanone mono-oxygenase and a number of different mono-oxygenases. 2.09e-10	-	KOG1238, KOG1238, KOG1238, Glucose dehydrogenase/choline dehydrogenase/mandelonitrile lyase (GMC oxidoreductase family) [General function prediction only]. 2.02e-44	sp|A4XPI5|BETA_PSEMY Oxygen-dependent choline dehydrogenase OS=Pseudomonas mendocina (strain ymp) GN=betA PE=3 SV=1 1.51e-47	-	XP_024085431.1 glucose dehydrogenase [FAD, quinone]-like isoform X2 [Cimex lectularius] 3.26e-38	-
TRINITY_DN12638_c0_g1	1.34532	9.32658	-2.7934	0.000104807	0.00306457	down	cd05370, SDR_c2, classical (c) SDR, subgroup 2. Short-chain dehydrogenases/reductases (SDRs, aka Tyrosine-dependent oxidoreductases) are a functionally diverse family of oxidoreductases that have a single domain with a structurally conserved Rossmann fold (alpha/beta folding pattern with a central beta-sheet), an NAD(P)(H)-binding region, and a structurally diverse C-terminal region. Classical SD…	pfam00106, adh_short, short chain dehydrogenase. This family contains a wide variety of dehydrogenases. 1.19e-16	-	KOG0725, KOG0725, KOG0725, Reductases with broad range of substrate specificities [General function prediction only]. 2.26e-12	sp|P39577|DLTE_BACSU Uncharacterized oxidoreductase DltE OS=Bacillus subtilis (strain 168) GN=dltE PE=3 SV=2 5.67e-24	-	CAF4233055.1 unnamed protein product, partial [Adineta steineri] 1.32e-25	-
TRINITY_DN12649_c0_g1	2.56331	11.0962	-2.11399	0.000350692	0.00784528	down	cd18018, DEXHc_RecQ4-like, DEAH-box helicase domain of RecQ4 and similar proteins. ATP-dependent DNA helicase Q4 (RecQ4) is part of the RecQ family of highly conserved DNA repair helicases that is part of the type II DEAD box helicase superfamily, a diverse family of proteins involved in ATP-dependent RNA or DNA unwinding. This domain contains the ATP-binding region. Mutations cause Rothmund-Thom…	pfam00271, Helicase_C, Helicase conserved C-terminal domain. The Prosite family is restricted to DEAD/H helicases, whereas this domain family is found in a wide variety of helicases and helicase related proteins. It may be that this is not an autonomously folding unit, but an integral part of the helicase. 1.42e-07	-	KOG0351, KOG0351, KOG0351, ATP-dependent DNA helicase [Replication, recombination and repair]. 1.98e-64	sp|P15043|RECQ_ECOLI ATP-dependent DNA helicase RecQ OS=Escherichia coli (strain K12) GN=recQ PE=1 SV=5 2.10e-78	-	MCL4115584.1 hypothetical protein [Idotea baltica] 3.31e-122	-
TRINITY_DN12657_c0_g1	397.456	1755.23	-2.14279	0.00011061	0.00317505	down	-	pfam06441, EHN, Epoxide hydrolase N-terminus. This family represents the N-terminal region of the eukaryotic epoxide hydrolase protein. Epoxide hydrolases (EC:3.3.2.3) comprise a group of functionally related enzymes that catalyze the addition of water to oxirane compounds (epoxides), thereby usually generating vicinal trans-diols. EHs have been found in all types of living organisms, including m…	-	KOG2565, KOG2565, KOG2565, Predicted hydrolases or acyltransferases (alpha/beta hydrolase superfamily) [General function prediction only]. 2.99e-20	sp|Q06816|HYEP_STIAD Putative epoxide hydrolase OS=Stigmatella aurantiaca (strain DW4/3-1) GN=STAUR_4299 PE=3 SV=2 4.62e-36	-	CAF1262954.1 unnamed protein product [Adineta steineri] >CAF1551546.1 unnamed protein product [Adineta steineri] 2.47e-119	-
TRINITY_DN12664_c0_g1	13.5055	48.1887	-1.83515	6.1498e-05	0.00203008	down	cd13866, CuRO_2_BOD, The second cupredoxin domain of Bilirubin oxidase (BOD). Bilirubin oxidase (BOD) catalyzes the oxidation of bilirubin to biliverdin and the four-electron reduction of molecular oxygen to water. It is used in diagnosing jaundice through the determination of bilirubin in serum. BOD is a member of the multicopper oxidase (MCO) family that also includes laccase, ascorbate oxidase…	pfam07732, Cu-oxidase_3, Multicopper oxidase. This entry contains many divergent copper oxidase-like domains that are not recognized by the pfam00394 model. 1.42e-10	-	KOG1263, KOG1263, KOG1263, Multicopper oxidases [Secondary metabolites biosynthesis, transport and catabolism]. 7.97e-09	sp|Q12737|BLRO_MYRVE Bilirubin oxidase OS=Myrothecium verrucaria PE=1 SV=1 0.0	-	CAF1487125.1 unnamed protein product [Adineta ricciae] 1.51e-64	-
TRINITY_DN12664_c0_g2	18.8579	91.0238	-2.27107	0.000118138	0.00335275	down	cd13866, CuRO_2_BOD, The second cupredoxin domain of Bilirubin oxidase (BOD). Bilirubin oxidase (BOD) catalyzes the oxidation of bilirubin to biliverdin and the four-electron reduction of molecular oxygen to water. It is used in diagnosing jaundice through the determination of bilirubin in serum. BOD is a member of the multicopper oxidase (MCO) family that also includes laccase, ascorbate oxidase…	pfam07731, Cu-oxidase_2, Multicopper oxidase. This entry contains many divergent copper oxidase-like domains that are not recognized by the pfam00394 model. 3.40e-10	-	-	sp|Q12737|BLRO_MYRVE Bilirubin oxidase OS=Myrothecium verrucaria PE=1 SV=1 0.0	-	CAF1487125.1 unnamed protein product [Adineta ricciae] 4.54e-69	-
TRINITY_DN12680_c0_g2	14.006	3.70382	1.91896	0.00431835	0.047022	up	-	pfam08801, Nucleoporin_N, Nup133 N terminal like. Nup133 is a nucleoporin that is crucial for nuclear pore complex (NPC) biogenesis. The N terminal forms a seven-bladed beta propeller structure. This family now contains other sized nucleoporins, including Nup155, Nup8, Nuo132, Nup15 and Nup170. 6.91e-33	K14312-ko03013 RNA transport	KOG1900, KOG1900, KOG1900, Nuclear pore complex, Nup155 component (D Nup154, sc Nup157/Nup170) [Nuclear structure, Intracellular trafficking, secretion, and vesicular transport]. 9.45e-113	sp|G0S7B6|NU170_CHATD Nucleoporin NUP170 OS=Chaetomium thermophilum (strain DSM 1495 / CBS 144.50 / IMI 039719) GN=NUP170 PE=1 SV=1 0.0	GO:0000972, transcription-dependent tethering of RNA polymerase II gene DNA at nuclear periphery;GO:0000973, posttranscriptional tethering of RNA polymerase II gene DNA at nuclear periphery;GO:0003674, molecular_function;GO:0003676, nucleic acid binding;GO:0003677, DNA binding;GO:0003682, chromatin binding;GO:0003723, RNA binding;GO:0005198, structural molecule activity;GO:0005488, binding;GO:000…	7TBJ_A5 Chain A5, NUP155 [Homo sapiens] >7TBJ_A6 Chain A6, NUP155 [Homo sapiens] >7TBK_A5 Chain A5, NUP155 [Homo sapiens] >7TBK_A6 Chain A6, NUP155 [Homo sapiens] >7TBM_A5 Chain A5, NUP155 [Homo sapiens] >7TBM_A6 Chain A6, NUP155 [Homo sapiens] 0.0	-
TRINITY_DN12692_c0_g1	3.36504	19.883	-2.56284	0.00350637	0.0417063	down	cd03379, beta_CA_cladeD, Carbonic anhydrases (CA) are zinc-containing enzymes that catalyze the reversible hydration of carbon dioxide in a two-step mechanism in which the nucleophilic attack of a zinc-bound hydroxide ion on carbon dioxide is followed by the regeneration of an active site by ionization of the zinc-bound water molecule and removal of a proton from the active site. CAs are ubiquito…	pfam06500, DUF1100, Alpha/beta hydrolase of unknown function (DUF1100). This family consists of several hypothetical bacterial proteins of unknown function. Members of this family have an alpha/beta hydrolase fold. 1.80e-09	-	-	sp|Q4WZB3|AYG1_ASPFU Heptaketide hydrolyase ayg1 OS=Neosartorya fumigata (strain ATCC MYA-4609 / Af293 / CBS 101355 / FGSC A1100) GN=ayg1 PE=1 SV=1 4.02e-80	-	CAF1117695.1 unnamed protein product [Rotaria sordida] >CAF1333503.1 unnamed protein product [Rotaria sordida] 3.21e-14	-
TRINITY_DN12712_c0_g1	3.08233	6.67152	-1.114	0.00371202	0.0428813	down	cd12148, fungal_TF_MHR, fungal transcription factor regulatory middle homology region. This domain is present in the large family of fungal zinc cluster transcription factors that contain an N-terminal GAL4-like C6 zinc binuclear cluster DNA-binding domain. Examples of members of this large fungal group are the following Saccharomyces cerevisiae transcription factors, GAL4, STB5, DAL81, CAT8, RDR…	-	-	-	sp|O14130|YF54_SCHPO Uncharacterized transcriptional regulatory protein C3C7.04 OS=Schizosaccharomyces pombe (strain 972 / ATCC 24843) GN=SPAC3C7.04 PE=3 SV=1 2.82e-23	-	-	-
TRINITY_DN12725_c0_g3	17.4508	2.31478	2.91435	0.000458977	0.0096117	up	-	pfam03198, Glyco_hydro_72, Glucanosyltransferase. This is a family of glycosylphosphatidylinositol-anchored beta(1-3)glucanosyltransferases. The active site residues in the Aspergillus fumigatus example are the two glutamate residues at 160 and 261. 1.13e-81	-	-	sp|P56092|EPD1_CANMA Protein EPD1 OS=Candida maltosa GN=EPD1 PE=3 SV=1 1.69e-78	-	KNC24030.1 hypothetical protein FF38_04304, partial [Lucilia cuprina] 7.78e-08	-
TRINITY_DN12731_c0_g1	8.40977	19.7008	-1.22811	0.000978594	0.0166334	down	cd05345, BKR_3_SDR_c, putative beta-ketoacyl acyl carrier protein [ACP] reductase (BKR), subgroup 3, classical (c) SDR. This subgroup includes the putative Brucella melitensis biovar Abortus 2308 BKR, FabG, Mesorhizobium loti MAFF303099 FabG, and other classical SDRs. BKR, a member of the SDR family, catalyzes the NADPH-dependent reduction of acyl carrier protein in the first reductive step of de…	pfam00106, adh_short, short chain dehydrogenase. This family contains a wide variety of dehydrogenases. 2.18e-37	-	KOG0725, KOG0725, KOG0725, Reductases with broad range of substrate specificities [General function prediction only]. 1.39e-32	sp|P94681|TSAC_COMTE 4-formylbenzenesulfonate dehydrogenase TsaC1/TsaC2 OS=Comamonas testosteroni GN=tsaC1 PE=1 SV=1 8.62e-56	-	MCL4105199.1 hypothetical protein [Idotea baltica] 7.26e-47	-
TRINITY_DN12733_c0_g1	9.70763	1.62548	2.57825	0.000677778	0.0126896	up	-	-	-	-	-	-	-	-
TRINITY_DN12743_c0_g1	99.9148	28.7461	1.79733	0.00246281	0.0325881	up	-	pfam17829, GH115_C, Gylcosyl hydrolase family 115 C-terminal domain. This domain is found at the C-terminus of glycosyl hydrolase family 115 proteins. This domain has a beta-sandwich fold. 1.71e-34	-	KOG3458, KOG3458, KOG3458, NADH:ubiquinone oxidoreductase, NDUFA8/PGIV/19 kDa subunit [Energy production and conversion]. 1.34e-09	sp|P21976|NDUA8_NEUCR NADH-ubiquinone oxidoreductase 20.8 kDa subunit OS=Neurospora crassa (strain ATCC 24698 / 74-OR23-1A / CBS 708.71 / DSM 1257 / FGSC 987) GN=B1O14.280 PE=1 SV=2 5.59e-64	-	KAJ3021444.1 hypothetical protein HDU68_009619 [Siphonaria sp. JEL0065] 7.18e-25	-
TRINITY_DN12744_c0_g1	5.87707	2.1644	1.44113	0.00456565	0.0483959	up	-	-	-	-	-	-	-	-
TRINITY_DN12772_c0_g1	2.78147	6.58868	-1.24414	0.0038361	0.0437455	down	-	-	-	-	-	-	-	-
TRINITY_DN12785_c0_g1	14.9537	2.59371	2.52742	0.00036105	0.00794564	up	-	pfam00732, GMC_oxred_N, GMC oxidoreductase. This family of proteins bind FAD as a cofactor. 8.81e-18	-	KOG1238, KOG1238, KOG1238, Glucose dehydrogenase/choline dehydrogenase/mandelonitrile lyase (GMC oxidoreductase family) [General function prediction only]. 9.22e-46	sp|Q00922|ALOX_CANBO Alcohol oxidase OS=Candida boidinii GN=AOD1 PE=1 SV=1 1.77e-112	-	GFR59117.1 choline dehydrogenase [Elysia marginata] 1.61e-50	-
TRINITY_DN12787_c0_g1	117.85	31.0787	1.92295	0.00277052	0.0353904	up	-	-	-	-	-	-	-	-
TRINITY_DN12787_c0_g2	220.932	548.868	-1.31285	0.000137335	0.00378622	down	cd00610, OAT_like, Acetyl ornithine aminotransferase family. This family belongs to pyridoxal phosphate (PLP)-dependent aspartate aminotransferase superfamily (fold I). The major groups in this CD correspond to ornithine aminotransferase, acetylornithine aminotransferase, alanine-glyoxylate aminotransferase, dialkylglycine decarboxylase, 4-aminobutyrate aminotransferase, beta-alanine-pyruvate ami…	pfam00202, Aminotran_3, Aminotransferase class-III. 1.09e-85	K00819-ko00330 Arginine and proline metabolism	KOG1402, KOG1402, KOG1402, Ornithine aminotransferase [Amino acid transport and metabolism]. 4.34e-178	sp|Q92413|OAT_EMENI Ornithine aminotransferase OS=Emericella nidulans (strain FGSC A4 / ATCC 38163 / CBS 112.46 / NRRL 194 / M139) GN=otaA PE=3 SV=2 0.0	GO:0003674, molecular_function;GO:0003824, catalytic activity;GO:0004587, ornithine-oxo-acid transaminase activity;GO:0005488, binding;GO:0005515, protein binding;GO:0005575, cellular_component;GO:0005622, intracellular;GO:0005623, cell;GO:0005634, nucleus;GO:0005737, cytoplasm;GO:0005829, cytosol;GO:0006082, organic acid metabolic process;GO:0006520, cellular amino acid metabolic process;GO:0006…	NXD32589.1 OAT aminotransferase [Elachura formosa] 2.01e-178	-
TRINITY_DN12798_c0_g1	4.947	22.2638	-2.17008	3.83592e-05	0.00136698	down	-	-	-	-	-	-	-	-
TRINITY_DN12799_c0_g1	1.47549	3.61482	-1.29273	0.00111245	0.018434	down	-	pfam03211, Pectate_lyase, Pectate lyase. 8.37e-29	-	-	sp|A1D5E3|PLYF_NEOFI Probable pectate lyase F OS=Neosartorya fischeri (strain ATCC 1020 / DSM 3700 / FGSC A1164 / NRRL 181) GN=plyF PE=3 SV=1 1.42e-116	-	CAF3416766.1 unnamed protein product, partial [Rotaria socialis] 2.79e-51	-
TRINITY_DN12801_c0_g1	95.4337	23.3644	2.03019	0.00117275	0.0192597	up	-	pfam16192, PMT_4TMC, C-terminal four TMM region of protein-O-mannosyltransferase. PMT_4TMC is the C-terminal four membrane-pass region of protein-O-mannosyltransferases and similar enzymes. 4.11e-50	K00728-ko00514 Other types of O-glycan biosynthesis	KOG3359, KOG3359, KOG3359, Dolichyl-phosphate-mannose:protein O-mannosyl transferase [Posttranslational modification, protein turnover, chaperones]. 5.50e-177	sp|O74189|PMT1_CANAL Dolichyl-phosphate-mannose--protein mannosyltransferase 1 OS=Candida albicans (strain SC5314 / ATCC MYA-2876) GN=PMT1 PE=2 SV=1 0.0	GO:0000030, mannosyltransferase activity;GO:0000032, cell wall mannoprotein biosynthetic process;GO:0003674, molecular_function;GO:0003824, catalytic activity;GO:0004169, dolichyl-phosphate-mannose-protein mannosyltransferase activity;GO:0005575, cellular_component;GO:0005622, intracellular;GO:0005623, cell;GO:0005737, cytoplasm;GO:0005783, endoplasmic reticulum;GO:0005789, endoplasmic reticulum …	KAJ3018789.1 hypothetical protein HDU68_010981 [Siphonaria sp. JEL0065] 6.51e-166	-
TRINITY_DN12807_c0_g1	8.70828	32.4135	-1.89613	3.68897e-07	3.08496e-05	down	cd17327, MFS_FEN2_like, Pantothenate transporter FEN2 and similar transporters of the Major Facilitator Superfamily. This family is composed of Saccharomyces cerevisiae pantothenate transporter FEN2 (or fenpropimorph resistance protein 2) and similar proteins from fungi and bacteria including fungal vitamin H transporter, allantoate permease, and high-affinity nicotinic acid transporter, as well …	-	-	KOG2533, KOG2533, KOG2533, Permease of the major facilitator superfamily [Carbohydrate transport and metabolism]. 6.60e-43	sp|Q9US44|YIZG_SCHPO Uncharacterized transporter C1002.16c OS=Schizosaccharomyces pombe (strain 972 / ATCC 24843) GN=SPAC1002.16c PE=3 SV=1 4.95e-49	-	UJR34789.1 hypothetical protein I4U23_027570 [Adineta vaga] 6.81e-65	-
TRINITY_DN12809_c0_g1	6.09998	17.6861	-1.53574	6.11283e-05	0.0020232	down	cd12148, fungal_TF_MHR, fungal transcription factor regulatory middle homology region. This domain is present in the large family of fungal zinc cluster transcription factors that contain an N-terminal GAL4-like C6 zinc binuclear cluster DNA-binding domain. Examples of members of this large fungal group are the following Saccharomyces cerevisiae transcription factors, GAL4, STB5, DAL81, CAT8, RDR…	-	-	-	sp|S0E028|BIK5_GIBF5 Bikaverin cluster transcription factor bik5 OS=Gibberella fujikuroi (strain CBS 195.34 / IMI 58289 / NRRL A-6831) GN=bik5 PE=2 SV=1 1.38e-37	-	-	-
TRINITY_DN12812_c0_g2	8.87043	33.4272	-1.91394	7.85121e-05	0.00242575	down	-	-	-	-	-	-	-	-
TRINITY_DN12816_c0_g2	11.9426	3.19352	1.90289	0.00373143	0.0430212	up	cd16273, SNM1A-1C-like_MBL-fold, SNM1A , artemis/SNM1C, yeast Pso2p, and related proteins; MBL-fold metallo-hydrolase domain. Includes human SNM1A (SNM1 homolog A, also known as DNA cross-link repair 1A protein) and Saccharomyces cerevisiae Pso2 protein (PSOralen derivative sensitive 2, also known as SNM1, sensitive to nitrogen mustard 1), both proteins are 5'-exonucleases and function in interst…	pfam07522, DRMBL, DNA repair metallo-beta-lactamase. The metallo-beta-lactamase fold contains five sequence motifs. The first four motifs are found in pfam00753 and are common to all metallo-beta-lactamases. The fifth motif appears to be specific to function. This entry represents the fifth motif from metallo-beta-lactamases involved in DNA repair. 6.40e-20	-	KOG1361, KOG1361, KOG1361, Predicted hydrolase involved in interstrand cross-link repair [Replication, recombination and repair]. 4.52e-73	sp|Q10264|PSO2_SCHPO DNA cross-link repair protein pso2/snm1 OS=Schizosaccharomyces pombe (strain 972 / ATCC 24843) GN=pso2 PE=3 SV=3 9.88e-108	GO:0000228, nuclear chromosome;GO:0000723, telomere maintenance;GO:0000726, non-recombinational repair;GO:0000781, chromosome, telomeric region;GO:0000784, nuclear chromosome, telomeric region;GO:0003674, molecular_function;GO:0003676, nucleic acid binding;GO:0003677, DNA binding;GO:0003684, damaged DNA binding;GO:0003824, catalytic activity;GO:0004518, nuclease activity;GO:0004527, exonuclease a…	XP_013385762.1 DNA cross-link repair protein SNM1-like [Lingula anatina] 8.42e-72	-
TRINITY_DN12830_c0_g1	5.59103	11.7698	-1.07391	0.00442842	0.04756	down	cd07000, cupin_HGO_N, homogentisate 1,2-dioxygenase and related proteins, N-terminal cupin domain. This family includes homogentisate 1,2-dioxygenase (also known as homogentisate oxygenase, homogentisic acid oxidase, homogentisicase, HGO, HGD, HGDO, or HmgA; EC 1.13.11.5), which is involved in the metabolic degradation of phenylalanine and tyrosine. It catalyzes the crucial aromatic ring opening …	pfam04209, HgmA, homogentisate 1,2-dioxygenase. Homogentisate dioxygenase cleaves the aromatic ring during the metabolic degradation of Phe and Tyr. Homogentisate dioxygenase deficiency causes alkaptonuria. The structure of homogentisate dioxygenase shows that the enzyme forms a hexamer arrangement comprised of a dimer of trimers. The active site iron ion is coordinated near the interface between…	K00451-ko00643 Styrene degradation;ko00350 Tyrosine metabolism	KOG1417, KOG1417, KOG1417, Homogentisate 1,2-dioxygenase [Amino acid transport and metabolism]. 7.44e-95	sp|Q00667|HGD_EMENI Homogentisate 1,2-dioxygenase OS=Emericella nidulans (strain FGSC A4 / ATCC 38163 / CBS 112.46 / NRRL 194 / M139) GN=hmgA PE=2 SV=1 6.33e-115	-	RZF41311.1 hypothetical protein LSTR_LSTR000025 [Laodelphax striatellus] 9.40e-95	-
TRINITY_DN12844_c0_g1	1.15782	9.31888	-3.00875	4.03689e-07	3.30972e-05	down	-	-	-	-	-	-	-	-
TRINITY_DN12847_c0_g1	8.36987	30.0869	-1.84586	5.81936e-06	0.000311937	down	cd17546, REC_hyHK_CKI1_RcsC-like, phosphoacceptor receiver (REC) domain of hybrid sensor histidine kinases/response regulators similar to Arabidopsis thaliana CKI1 and Escherichia coli RcsC. This family is composed of hybrid sensor histidine kinases/response regulators that are sensor histidine kinases (HKs) fused with a REC domain, similar to the sensor histidine kinase CKI1 from Arabidopsis tha…	pfam00072, Response_reg, Response regulator receiver domain. This domain receives the signal from the sensor partner in bacterial two-component systems. It is usually found N-terminal to a DNA binding effector domain. 9.69e-08	-	KOG0519, KOG0519, KOG0519, Sensory transduction histidine kinase [Signal transduction mechanisms]. 2.14e-12	sp|P54302|LUXQ_VIBHA Autoinducer 2 sensor kinase/phosphatase LuxQ OS=Vibrio harveyi GN=luxQ PE=1 SV=1 4.54e-15	-	KAF4516036.1 hypothetical protein B566_EDAN000273 [Ephemera danica] 1.51e-26	-
TRINITY_DN12855_c0_g1	3.75817	15.144	-2.01064	1.7906e-07	1.61068e-05	down	-	-	-	-	-	-	XP_039301574.1 uncharacterized protein LOC120356678 [Nilaparvata lugens] 6.02e-11	-
TRINITY_DN12860_c0_g1	53.7475	234.406	-2.12474	0.00123785	0.0200098	down	-	-	-	-	-	-	-	-
TRINITY_DN12877_c0_g1	88.2134	1256.55	-3.83233	1.02474e-12	6.18571e-10	down	-	pfam01494, FAD_binding_3, FAD binding domain. This domain is involved in FAD binding in a number of enzymes. 8.97e-40	-	-	sp|O07561|YHJG_BACSU Uncharacterized aromatic compound monooxygenase YhjG OS=Bacillus subtilis (strain 168) GN=yhjG PE=3 SV=1 4.06e-59	-	CAF1040065.1 unnamed protein product [Adineta steineri] >CAF1103335.1 unnamed protein product [Adineta steineri] 1.80e-53	-
TRINITY_DN12881_c0_g1	114.878	321.121	-1.48302	0.000123981	0.00349487	down	cd01882, BMS1, Bms1, an essential GTPase, promotes assembly of preribosomal RNA processing complexes. Bms1 is an essential, evolutionarily conserved, nucleolar protein. Its depletion interferes with processing of the 35S pre-rRNA at sites A0, A1, and A2, and the formation of 40S subunits. Bms1, the putative endonuclease Rc11, and the essential U3 small nucleolar RNA form a stable subcomplex that …	pfam04950, RIBIOP_C, 40S ribosome biogenesis protein Tsr1 and BMS1 C-terminal. RIBIOP_C is a family of eukaryotic proteins from the C-terminus of pre-rRNA-processing protein or ribosome biogenesis proteins BMS1 and TSR1. These proteins act, in the nucleolus, as a molecular switch during maturation of the 40S ribosomal subunit. This domain, domain IV of translation elongation factor selb, adopts t…	K14569-ko03008 Ribosome biogenesis in eukaryotes	KOG1980, KOG1980, KOG1980, Uncharacterized conserved protein [Function unknown]. 3.83e-07	sp|O94653|BMS1_SCHPO Ribosome biogenesis protein bms1 OS=Schizosaccharomyces pombe (strain 972 / ATCC 24843) GN=bms1 PE=1 SV=2 0.0	GO:0000166, nucleotide binding;GO:0000462, maturation of SSU-rRNA from tricistronic rRNA transcript (SSU-rRNA, 5.8S rRNA, LSU-rRNA);GO:0000469, cleavage involved in rRNA processing;GO:0000472, endonucleolytic cleavage to generate mature 5'-end of SSU-rRNA from (SSU-rRNA, 5.8S rRNA, LSU-rRNA);GO:0000478, endonucleolytic cleavage involved in rRNA processing;GO:0000479, endonucleolytic cleavage of t…	KAJ3031359.1 Glycoside hydrolase 2 (Mannanase, beta-galactosidase) [Siphonaria sp. JEL0065] 7.34e-247	-
TRINITY_DN12912_c0_g1	4.08461	0.111997	5.18866	0.000110115	0.00316809	up	cd04458, CSP_CDS, Cold-Shock Protein (CSP) contains an S1-like cold-shock domain (CSD) that is found in eukaryotes, prokaryotes, and archaea. CSP's include the major cold-shock proteins CspA and CspB in bacteria and the eukaryotic gene regulatory factor Y-box protein. CSP expression is up-regulated by an abrupt drop in growth temperature. CSP's are also expressed under normal condition at lower l…	pfam00313, CSD, 'Cold-shock' DNA-binding domain. 8.84e-17	-	KOG3070, KOG3070, KOG3070, Predicted RNA-binding protein containing PIN domain and invovled in translation or RNA processing [Translation, ribosomal structure and biogenesis]. 4.72e-30	sp|P62961|YBOX1_RAT Nuclease-sensitive element-binding protein 1 OS=Rattus norvegicus GN=Ybx1 PE=2 SV=3 8.74e-116	GO:0000003, reproduction;GO:0000122, negative regulation of transcription by RNA polymerase II;GO:0000375, RNA splicing, via transesterification reactions;GO:0000377, RNA splicing, via transesterification reactions with bulged adenosine as nucleophile;GO:0000398, mRNA splicing, via spliceosome;GO:0000976, transcription regulatory region sequence-specific DNA binding;GO:0000977, RNA polymerase II …	XP_007186276.1 nuclease-sensitive element-binding protein 1 [Balaenoptera acutorostrata scammoni] 1.52e-147	Homo sapiens Y-box binding protein 1 (YBX1), transcript variant 1, mRNA 0.0
TRINITY_DN12913_c0_g1	4.653	0.299732	3.95642	0.000153778	0.00419347	up	cd05795, Ribosomal_P0_L10e, Ribosomal protein L10 family, P0 and L10e subfamily; composed of eukaryotic 60S ribosomal protein P0 and the archaeal P0 homolog, L10e. P0 or L10e forms a tight complex with multiple copies of the small acidic protein L12(e). This complex forms a stalk structure on the large subunit of the ribosome. The stalk is known to contain the binding site for elongation factors …	pfam17777, RL10P_insert, Insertion domain in 60S ribosomal protein L10P. This domain is found in prokaryotic and archaeal ribosomal L10 protein. 2.60e-09	K02941-ko03010 Ribosome	KOG0815, KOG0815, KOG0815, 60S acidic ribosomal protein P0 [Translation, ribosomal structure and biogenesis]. 2.65e-135	sp|P05388|RLA0_HUMAN 60S acidic ribosomal protein P0 OS=Homo sapiens GN=RPLP0 PE=1 SV=1 0.0	GO:0000184, nuclear-transcribed mRNA catabolic process, nonsense-mediated decay;GO:0000956, nuclear-transcribed mRNA catabolic process;GO:0002181, cytoplasmic translation;GO:0003674, molecular_function;GO:0003735, structural constituent of ribosome;GO:0003824, catalytic activity;GO:0003906, DNA-(apurinic or apyrimidinic site) endonuclease activity;GO:0004518, nuclease activity;GO:0004519, endonuc…	NP_000993.1 60S acidic ribosomal protein P0 [Homo sapiens] >NP_444505.1 60S acidic ribosomal protein P0 [Homo sapiens] >XP_002823894.1 60S acidic ribosomal protein P0 [Pongo abelii] >XP_003280010.1 60S acidic ribosomal protein P0 [Nomascus leucogenys] >XP_004054038.1 60S acidic ribosomal protein P0 [Gorilla gorilla gorilla] >XP_004054039.1 60S acidic ribosomal protein P0 [Gorilla gorilla gorilla]…	Homo sapiens ribosomal protein lateral stalk subunit P0 (RPLP0), transcript variant 1, mRNA 0.0
TRINITY_DN12940_c0_g1	28.6051	5.21634	2.45516	3.37005e-05	0.00123247	up	cd17323, MFS_Tpo1_MDR_like, Yeast Polyamine transporter 1 (Tpo1) and similar multidrug resistance (MDR) transporters of the Major Facilitator Superfamily. This family is composed of fungal multidrug resistance (MDR) transporters including several proteins from Saccharomyces cerevisiae such as polyamine transporters 1-4 (Tpo1-4), quinidine resistance proteins 1-3 (Qdr1-3), dityrosine transporter 1…	-	-	-	sp|Q10084|MFS2_SCHPO Uncharacterized transporter mfs2 OS=Schizosaccharomyces pombe (strain 972 / ATCC 24843) GN=mfs2 PE=3 SV=1 2.79e-41	-	CAF1255392.1 unnamed protein product [Adineta steineri] >CAF1542784.1 unnamed protein product [Adineta steineri] 1.72e-54	-
TRINITY_DN12956_c0_g1	13.2888	30.0527	-1.17729	0.00435565	0.0472474	down	cd11060, CYP57A1-like, cytochrome P450 family 57, subfamily A, polypeptide 1 and similar cytochrome P450s. This family is composed of fungal cytochrome P450s including: Nectria haematococca cytochrome P450 57A1 (CYP57A1), also called pisatin demethylase, which detoxifies the phytoalexin pisatin; Penicillium aethiopicum P450 monooxygenase gsfF, also called griseofulvin synthesis protein F, which c…	pfam00067, p450, Cytochrome P450. Cytochrome P450s are haem-thiolate proteins involved in the oxidative degradation of various compounds. They are particularly well known for their role in the degradation of environmental toxins and mutagens. They can be divided into 4 classes, according to the method by which electrons from NAD(P)H are delivered to the catalytic site. Sequence conservation is re…	-	KOG0158, KOG0158, KOG0158, Cytochrome P450 CYP3/CYP5/CYP6/CYP9 subfamilies [Secondary metabolites biosynthesis, transport and catabolism]. 3.89e-15	sp|Q12645|PID9_FUSSO Pisatin demethylase OS=Fusarium solani subsp. pisi GN=PDAT9 PE=3 SV=1 1.03e-50	-	UPN65130.1 cytochrome P450-13, partial [Laodelphax striatellus] 1.35e-24	-
TRINITY_DN12963_c0_g1	24.1574	68.7259	-1.50839	0.000267711	0.00643326	down	cd11063, CYP52, cytochrome P450 family 52. Cytochrome P450 52 (CYP52), also called P450ALK, monooxygenases catalyze the first hydroxylation step in the assimilation of alkanes and fatty acids by filamentous fungi. The number of CYP52 proteins depend on the fungal species: for example, Candida tropicalis has seven, Candida maltose has eight, and Yarrowia lipolytica has twelve. The CYP52 family bel…	pfam00067, p450, Cytochrome P450. Cytochrome P450s are haem-thiolate proteins involved in the oxidative degradation of various compounds. They are particularly well known for their role in the degradation of environmental toxins and mutagens. They can be divided into 4 classes, according to the method by which electrons from NAD(P)H are delivered to the catalytic site. Sequence conservation is re…	-	KOG0157, KOG0157, KOG0157, Cytochrome P450 CYP4/CYP19/CYP26 subfamilies [Secondary metabolites biosynthesis, transport and catabolism, Lipid transport and metabolism]. 1.03e-40	sp|Q9Y758|CP52M_DEBHN Cytochrome P450 52A13 OS=Debaryomyces hansenii GN=CYP52A13 PE=2 SV=1 3.15e-87	-	XP_025103433.1 cytochrome P450 3A5-like isoform X7 [Pomacea canaliculata] 4.62e-31	-
TRINITY_DN12965_c0_g1	11.4058	168.877	-3.88813	8.1563e-08	8.74467e-06	down	-	-	-	-	-	-	-	-
TRINITY_DN12974_c0_g1	5.22846	0.85431	2.61355	0.000205501	0.00525011	up	-	-	-	-	-	-	-	-
TRINITY_DN12980_c0_g1	102.468	279.672	-1.44857	0.00032826	0.00745959	down	cd11290, gelsolin_S1_like, Gelsolin sub-domain 1-like domain found in gelsolin, severin, villin, and related proteins. Gelsolin repeats occur in gelsolin, severin, villin, advillin, villidin, supervillin, flightless, quail, fragmin, and other proteins, usually in several copies. They co-occur with villin headpiece domains, leucine-rich repeats, and several other domains. These gelsolin-related ac…	-	K05768-ko04810 Regulation of actin cytoskeleton;ko04666 Fc gamma R-mediated phagocytosis	KOG0443, KOG0443, KOG0443, Actin regulatory proteins (gelsolin/villin family) [Cytoskeleton]. 3.52e-06	sp|Q7JQD3|GELS1_LUMTE Gelsolin-like protein 1 OS=Lumbricus terrestris GN=AM PE=1 SV=1 4.91e-18	-	XP_031563686.1 gelsolin-like protein 1 [Actinia tenebrosa] 5.30e-32	-
TRINITY_DN12985_c0_g2	125.81	13.1355	3.2597	7.26493e-06	0.000370452	up	cd11040, CYP7_CYP8-like, cytochrome P450s similar to cytochrome P450 family 7, subfamily A, polypeptide 1, cytochrome P450 family 7, subfamily B, polypeptide 1, cytochrome P450 family 8, subfamily A, polypeptide 1. This family is composed of cytochrome P450s (CYPs) with similarity to the human P450s CYP7A1, CYP7B1, CYP8B1, CYP39A1 and prostacyclin synthase (CYP8A1). CYP7A1, CYP7B1, CYP8B1, and CY…	-	-	-	sp|Q9V5L3|C49A1_DROME Probable cytochrome P450 49a1 OS=Drosophila melanogaster GN=Cyp49a1 PE=2 SV=3 6.79e-08	-	NXT65724.1 CP8B1 hydroxylase [Chaetops frenatus] 1.05e-13	-
TRINITY_DN12989_c0_g1	10.4288	72.2985	-2.79339	6.28042e-08	6.97182e-06	down	cd03233, ABCG_PDR_domain1, First domain of the pleiotropic drug resistance-like subfamily G of ATP-binding cassette transporters. The pleiotropic drug resistance (PDR) is a well-described phenomenon occurring in fungi and shares several similarities with processes in bacteria and higher eukaryotes. This PDR subfamily represents domain I of its (ABC-IM)2 organization. ABC transporters are a large …	pfam06422, PDR_CDR, CDR ABC transporter. Corresponds to a region of the PDR/CDR subgroup of ABC transporters comprising extracellular loop 3, transmembrane segment 6 and linker region. 4.54e-24	-	KOG0065, KOG0065, KOG0065, Pleiotropic drug resistance proteins (PDR1-15), ABC superfamily [Secondary metabolites biosynthesis, transport and catabolism]. 7.77e-14	sp|O74676|CDR4_CANAX ABC transporter CDR4 OS=Candida albicans GN=CDR4 PE=3 SV=1 7.17e-09	GO:0000166, nucleotide binding;GO:0000322, storage vacuole;GO:0000323, lytic vacuole;GO:0000324, fungal-type vacuole;GO:0000724, double-strand break repair via homologous recombination;GO:0000725, recombinational repair;GO:0003674, molecular_function;GO:0003824, catalytic activity;GO:0004012, phospholipid-translocating ATPase activity;GO:0005215, transporter activity;GO:0005319, lipid transporter…	KAJ3009872.1 hypothetical protein HDU68_002453, partial [Siphonaria sp. JEL0065] 7.43e-104	-
TRINITY_DN12995_c0_g1	94.0619	19.3062	2.28454	4.95483e-05	0.00170303	up	-	-	K12667-ko00513 Various types of N-glycan biosynthesis;ko00510 N-Glycan biosynthesis;ko04141 Protein processing in endoplasmic reticulum	KOG2447, KOG2447, KOG2447, Oligosaccharyltransferase, delta subunit (ribophorin II) [Posttranslational modification, protein turnover, chaperones]. 1.97e-07	sp|P25235|RPN2_RAT Dolichyl-diphosphooligosaccharide--protein glycosyltransferase subunit 2 OS=Rattus norvegicus GN=Rpn2 PE=2 SV=2 2.99e-10	GO:0005575, cellular_component;GO:0005622, intracellular;GO:0005623, cell;GO:0005737, cytoplasm;GO:0005783, endoplasmic reticulum;GO:0005789, endoplasmic reticulum membrane;GO:0006464, cellular protein modification process;GO:0006486, protein glycosylation;GO:0006487, protein N-linked glycosylation;GO:0006807, nitrogen compound metabolic process;GO:0008150, biological_process;GO:0008152, metaboli…	-	-
TRINITY_DN12999_c0_g1	6.35505	23.7661	-1.90293	3.219e-05	0.00118762	down	-	-	-	-	sp|P22143|CYAH_MYRVE Cyanamide hydratase OS=Myrothecium verrucaria GN=CAH PE=1 SV=1 2.35e-10	-	RWS19969.1 hypothetical protein B4U80_12181, partial [Leptotrombidium deliense] 1.38e-18	-
TRINITY_DN13002_c0_g3	12.5285	2.67088	2.22983	8.87274e-05	0.00269491	up	sd00016, Apc5, Tetratricopeptide repeat (TPR)-like motif of Apc5 and similar motifs. Apc5 is a subunit of the anaphase-promoting complex/cyclosome (APC/C) which is a multi-subunit ubiquitin ligase that mediates the proteolysis of cell cycle proteins in mitosis and G1. Apc5 binds the poly(A) binding protein (PABP), which directly binds the internal ribosome entry site (IRES) of growth factor 2 mRN…	pfam12862, ANAPC5, Anaphase-promoting complex subunit 5. Apc5 is a subunit of the anaphase-promoting complex/cyclosome (APC/C) which is a multi-subunit ubiquitin ligase that mediates the proteolysis of cell cycle proteins in mitosis and G1. Apc5, although it does not harbour a classical RNA binding domain, Apc5 binds the poly(A) binding protein (PABP), which directly binds the internal ribosome e…	K03352-ko04110 Cell cycle;ko04114 Oocyte meiosis;ko04914 Progesterone-mediated oocyte maturation;ko04111 Cell cycle - yeast;ko04120 Ubiquitin mediated proteolysis;ko04113 Meiosis - yeast	KOG4322, KOG4322, KOG4322, Anaphase-promoting complex (APC), subunit 5 [Cell cycle control, cell division, chromosome partitioning, Posttranslational modification, protein turnover, chaperones]. 9.60e-25	sp|O42636|CIA30_NEUCR Complex I intermediate-associated protein 30, mitochondrial OS=Neurospora crassa (strain ATCC 24698 / 74-OR23-1A / CBS 708.71 / DSM 1257 / FGSC 987) GN=cia30 PE=1 SV=1 1.24e-93	GO:0000151, ubiquitin ligase complex;GO:0000152, nuclear ubiquitin ligase complex;GO:0005575, cellular_component;GO:0005622, intracellular;GO:0005623, cell;GO:0005634, nucleus;GO:0005680, anaphase-promoting complex;GO:0006508, proteolysis;GO:0006511, ubiquitin-dependent protein catabolic process;GO:0006807, nitrogen compound metabolic process;GO:0007088, regulation of mitotic nuclear division;GO:…	CAA67682.1 unnamed protein product [Mus musculus] 3.87e-20	-
TRINITY_DN13010_c0_g1	7.46662	23.6147	-1.66116	0.000739858	0.0134504	down	-	-	-	-	-	-	-	-
TRINITY_DN13027_c0_g1	36.7133	95.0979	-1.37311	0.000103393	0.00303739	down	cd17323, MFS_Tpo1_MDR_like, Yeast Polyamine transporter 1 (Tpo1) and similar multidrug resistance (MDR) transporters of the Major Facilitator Superfamily. This family is composed of fungal multidrug resistance (MDR) transporters including several proteins from Saccharomyces cerevisiae such as polyamine transporters 1-4 (Tpo1-4), quinidine resistance proteins 1-3 (Qdr1-3), dityrosine transporter 1…	-	-	KOG0255, KOG0255, KOG0255, Synaptic vesicle transporter SVOP and related transporters (major facilitator superfamily) [General function prediction only]. 2.34e-09	sp|Q9USN4|YJA1_SCHPO Uncharacterized transporter C1529.01 OS=Schizosaccharomyces pombe (strain 972 / ATCC 24843) GN=SPCC1529.01 PE=3 SV=2 8.51e-29	-	CAF1212513.1 unnamed protein product [Adineta steineri] >CAF1494558.1 unnamed protein product [Adineta steineri] 6.06e-19	-
TRINITY_DN13036_c0_g1	23.2004	54.3795	-1.22891	0.000154858	0.00421375	down	cd19126, AKR_AKR5A_5G, AKR5A and AKR5G families of aldo-keto reductase (AKR). The AKR5A family of AKR includes prostaglandin F2-alpha synthase (PGFS) from Leishmania major (AKR5A1) and Trypanosoma brucei (AKR5A2). PGFS, also called 9,11-endoperoxide prostaglandin H2 reductase, catalyzes the NADP-dependent formation of prostaglandin F2-alpha from prostaglandin H2. It has also aldo/ketoreductase ac…	pfam00248, Aldo_ket_red, Aldo/keto reductase family. This family includes a number of K+ ion channel beta chain regulatory domains - these are reported to have oxidoreductase activity. 7.60e-14	-	KOG1577, KOG1577, KOG1577, Aldo/keto reductase family proteins [General function prediction only]. 1.98e-48	sp|O14088|YER5_SCHPO Uncharacterized oxidoreductase C2F3.05c OS=Schizosaccharomyces pombe (strain 972 / ATCC 24843) GN=SPAC2F3.05c PE=3 SV=1 4.63e-55	-	XP_020629581.1 prostaglandin F synthase-like isoform X1 [Orbicella faveolata] >XP_020629589.1 prostaglandin F synthase-like isoform X2 [Orbicella faveolata] 2.17e-53	-
TRINITY_DN13037_c0_g1	1.67507	5.43972	-1.69931	0.00234074	0.0316403	down	cd09008, MTAN, 5'-methylthioadenosine/S-adenosylhomocysteine nucleosidases. This subfamily includes both bacterial and plant 5'-methylthioadenosine/S-adenosylhomocysteine (MTA/SAH) nucleosidases (MTANs): bacterial MTANs show comparable efficiency in hydrolyzing MTA and SAH, while plant enzymes are highly specific for MTA and are unable to metabolize SAH or show significantly reduced activity towa…	-	-	-	-	-	KAI1694588.1 phosphorylase superfamily domain-containing protein [Ditylenchus destructor] 7.19e-83	-
TRINITY_DN13044_c0_g1	5.90658	0.696822	3.08346	0.00161062	0.0246632	up	cd01833, XynB_like, SGNH_hydrolase subfamily, similar to Ruminococcus flavefaciens XynB. Most likely a secreted hydrolase with xylanase activity. SGNH hydrolases are a diverse family of lipases and esterases. The tertiary fold of the enzyme is substantially different from that of the alpha/beta hydrolase family and unique among all known hydrolases; its active site closely resembles the Ser-His-A…	-	-	-	-	-	-	-
TRINITY_DN13068_c0_g1	19.8102	52.0553	-1.3938	0.000181918	0.00474602	down	-	pfam00326, Peptidase_S9, Prolyl oligopeptidase family. 6.33e-14	-	KOG2100, KOG2100, KOG2100, Dipeptidyl aminopeptidase [Posttranslational modification, protein turnover, chaperones]. 6.67e-11	sp|B0XRV0|DPP5_ASPFC Dipeptidyl-peptidase 5 OS=Neosartorya fumigata (strain CEA10 / CBS 144.89 / FGSC A1163) GN=AFUB_024920 PE=1 SV=1 0.0	GO:0003674, molecular_function;GO:0003824, catalytic activity;GO:0006508, proteolysis;GO:0006807, nitrogen compound metabolic process;GO:0008150, biological_process;GO:0008152, metabolic process;GO:0008233, peptidase activity;GO:0016787, hydrolase activity;GO:0019538, protein metabolic process;GO:0043170, macromolecule metabolic process;GO:0044238, primary metabolic process;GO:0071704, organic su…	CAF1528245.1 unnamed protein product [Rotaria sordida] >CAF1664413.1 unnamed protein product [Rotaria sordida] 3.65e-65	-
TRINITY_DN13069_c0_g1	1.94058	15.8556	-3.03043	1.87039e-08	2.44398e-06	down	cd06603, GH31_GANC_GANAB_alpha, neutral alpha-glucosidase C, neutral alpha-glucosidase AB. This subgroup includes the closely related glycosyl hydrolase family 31 (GH31) isozymes, neutral alpha-glucosidase C (GANC) and the alpha subunit of heterodimeric neutral alpha-glucosidase AB (GANAB). Initially distinguished on the basis of differences in electrophoretic mobility in starch gel, GANC and GAN…	pfam01055, Glyco_hydro_31, Glycosyl hydrolases family 31. Glycosyl hydrolases are key enzymes of carbohydrate metabolism. Family 31 comprises of enzymes that are, or similar to, alpha- galactosidases. 3.24e-28	K01187-ko00052 Galactose metabolism;ko00500 Starch and sucrose metabolism	KOG1065, KOG1065, KOG1065, Maltase glucoamylase and related hydrolases, glycosyl hydrolase family 31 [Carbohydrate transport and metabolism]. 1.06e-53	sp|Q12558|AGLU_ASPOR Alpha-glucosidase OS=Aspergillus oryzae (strain ATCC 42149 / RIB 40) GN=agdA PE=2 SV=1 0.0	GO:0000023, maltose metabolic process;GO:0000025, maltose catabolic process;GO:0000272, polysaccharide catabolic process;GO:0003674, molecular_function;GO:0003824, catalytic activity;GO:0004553, hydrolase activity, hydrolyzing O-glycosyl compounds;GO:0005575, cellular_component;GO:0005576, extracellular region;GO:0005618, cell wall;GO:0005623, cell;GO:0005975, carbohydrate metabolic process;GO:00…	XP_002109215.1 hypothetical protein TRIADDRAFT_21692, partial [Trichoplax adhaerens] >EDV27381.1 hypothetical protein TRIADDRAFT_21692, partial [Trichoplax adhaerens] 1.10e-99	-
TRINITY_DN13073_c1_g2	52.0558	122.169	-1.23075	0.000944774	0.0161902	down	-	pfam00153, Mito_carr, Mitochondrial carrier protein. 6.73e-06	-	KOG0758, KOG0758, KOG0758, Mitochondrial carnitine-acylcarnitine carrier protein [Energy production and conversion]. 1.32e-48	sp|Q12289|CRC1_YEAST Mitochondrial carnitine carrier OS=Saccharomyces cerevisiae (strain ATCC 204508 / S288c) GN=CRC1 PE=1 SV=1 8.58e-64	GO:0003674, molecular_function;GO:0005215, transporter activity;GO:0005476, carnitine:acyl carnitine antiporter activity;GO:0005575, cellular_component;GO:0005622, intracellular;GO:0005623, cell;GO:0005737, cytoplasm;GO:0005739, mitochondrion;GO:0005740, mitochondrial envelope;GO:0005743, mitochondrial inner membrane;GO:0006082, organic acid metabolic process;GO:0006629, lipid metabolic process;G…	XP_037281276.1 mitochondrial carnitine/acylcarnitine carrier protein-like isoform X2 [Rhipicephalus microplus] 1.28e-64	-
TRINITY_DN13085_c0_g1	112.772	29.1804	1.95034	0.00256398	0.033433	up	cd05474, SAP_like, SAPs, pepsin-like proteinases secreted from pathogens to degrade host proteins. SAPs (Secreted aspartic proteinases) are secreted from a group of pathogenic fungi, predominantly Candida species. They are secreted from the pathogen to degrade host proteins. SAP is one of the most significant extracellular hydrolytic enzymes produced by C. albicans. SAP proteins, encoded by a fam…	pfam00026, Asp, Eukaryotic aspartyl protease. Aspartyl (acid) proteases include pepsins, cathepsins, and renins. Two-domain structure, probably arising from ancestral duplication. This family does not include the retroviral nor retrotransposon proteases (pfam00077), which are much smaller and appear to be homologous to a single domain of the eukaryotic asp proteases. 2.12e-29	-	KOG3378, KOG3378, KOG3378, Hemoglobin-like flavoprotein [Energy production and conversion]. 1.76e-33	sp|Q7WUM8|HMP_RHIME Flavohemoprotein OS=Rhizobium meliloti (strain 1021) GN=hmp PE=3 SV=2 1.99e-72	-	GFR71550.1 flavohemoprotein [Elysia marginata] 2.58e-60	-
TRINITY_DN13089_c0_g2	7.68095	1.54101	2.31741	0.000557011	0.0110438	up	-	pfam00331, Glyco_hydro_10, Glycosyl hydrolase family 10. 4.17e-78	-	-	sp|Q5ZNB1|XYND_TALFU Endo-1,4-beta-xylanase D OS=Talaromyces funiculosus GN=xynD PE=1 SV=1 4.96e-85	-	AMD09876.1 endo-1,4-beta-endoxylanase [Mesosa myops] 3.69e-70	-
TRINITY_DN13091_c0_g1	112.14	252.325	-1.16998	0.00454121	0.048362	down	cd02073, P-type_ATPase_APLT_Dnf-like, Aminophospholipid translocases (APLTs), similar to Saccharomyces cerevisiae Dnf1-3p, Drs2p, and human ATP8A2, -10D, -11B, -11C. Aminophospholipid translocases (APLTs), also known as type 4 P-type ATPases, act as flippases, and translocate specific phospholipids from the exoplasmic leaflet to the cytoplasmic leaflet of biological membranes. Yeast Dnf1 and Dnf2…	pfam16212, PhoLip_ATPase_C, Phospholipid-translocating P-type ATPase C-terminal. PhoLip_ATPase_C is found at the C-terminus of a number of phospholipid-translocating ATPases. It is found in higher eukaryotes. 4.11e-57	-	KOG0206, KOG0206, KOG0206, P-type ATPase [General function prediction only]. 0.0	sp|O94296|YOOC_SCHPO Probable phospholipid-transporting ATPase C887.12 OS=Schizosaccharomyces pombe (strain 972 / ATCC 24843) GN=SPBC887.12 PE=3 SV=1 1.94e-06	GO:0000028, ribosomal small subunit assembly;GO:0000749, response to pheromone triggering conjugation with cellular fusion;GO:0003674, molecular_function;GO:0003824, catalytic activity;GO:0004012, phospholipid-translocating ATPase activity;GO:0005215, transporter activity;GO:0005319, lipid transporter activity;GO:0005548, phospholipid transporter activity;GO:0005575, cellular_component;GO:0005622…	XP_039299608.1 LOW QUALITY PROTEIN: probable phospholipid-transporting ATPase C887.12, partial [Nilaparvata lugens] 0.0	-
TRINITY_DN13098_c0_g2	0.396056	21.3436	-5.75196	8.05513e-21	2.02087e-17	down	-	-	-	-	sp|P38680|MTR_NEUCR N amino acid transport system protein OS=Neurospora crassa (strain ATCC 24698 / 74-OR23-1A / CBS 708.71 / DSM 1257 / FGSC 987) GN=mtr PE=3 SV=2 5.25e-16	-	KAJ3017480.1 hypothetical protein HDU68_011678 [Siphonaria sp. JEL0065] 3.24e-16	-
TRINITY_DN13108_c0_g1	68.4508	24.1867	1.50086	0.00117917	0.0193027	up	-	-	-	-	-	-	-	-
TRINITY_DN13116_c0_g1	9.18535	34.7166	-1.91822	1.59117e-05	0.00068355	down	cd05373, SDR_c10, classical (c) SDR, subgroup 10. This subgroup resembles the classical SDRs, but has an incomplete match to the canonical glycine rich NAD-binding motif and lacks the typical active site tetrad (instead of the critical active site Tyr, it has Phe, but contains the nearby Lys). SDRs are a functionally diverse family of oxidoreductases that have a single domain with a structurally …	pfam00106, adh_short, short chain dehydrogenase. This family contains a wide variety of dehydrogenases. 1.81e-08	-	-	-	-	CAF3898176.1 unnamed protein product [Rotaria sp. Silwood1] >CAF5107041.1 unnamed protein product [Rotaria sp. Silwood1] 1.06e-29	-
TRINITY_DN13120_c0_g1	1.62047	11.4723	-2.82368	7.69197e-07	5.74334e-05	down	cd00610, OAT_like, Acetyl ornithine aminotransferase family. This family belongs to pyridoxal phosphate (PLP)-dependent aspartate aminotransferase superfamily (fold I). The major groups in this CD correspond to ornithine aminotransferase, acetylornithine aminotransferase, alanine-glyoxylate aminotransferase, dialkylglycine decarboxylase, 4-aminobutyrate aminotransferase, beta-alanine-pyruvate ami…	pfam00202, Aminotran_3, Aminotransferase class-III. 7.82e-62	-	KOG1405, KOG1405, KOG1405, 4-aminobutyrate aminotransferase [Amino acid transport and metabolism]. 3.81e-140	sp|P14010|GABAT_EMENI 4-aminobutyrate aminotransferase OS=Emericella nidulans (strain FGSC A4 / ATCC 38163 / CBS 112.46 / NRRL 194 / M139) GN=gatA PE=3 SV=1 1.22e-172	-	XP_044271081.1 4-aminobutyrate aminotransferase, mitochondrial-like [Tribolium madens] 3.45e-128	-
TRINITY_DN13125_c0_g1	244.893	928.957	-1.92346	0.0031236	0.0383015	down	cd05325, carb_red_sniffer_like_SDR_c, carbonyl reductase sniffer-like, classical (c) SDRs. Sniffer is an NADPH-dependent carbonyl reductase of the classical SDR family. Studies in Drosophila melanogaster implicate Sniffer in the prevention of neurodegeneration due to aging and oxidative-stress. This subgroup also includes Rhodococcus sp. AD45 IsoH, which is an NAD-dependent 1-hydroxy-2-glutathion…	-	-	KOG1611, KOG1611, KOG1611, Predicted short chain-type dehydrogenase [General function prediction only]. 6.07e-09	sp|Q9P7I6|YJNK_SCHPO Uncharacterized oxidoreductase C24B10.20 OS=Schizosaccharomyces pombe (strain 972 / ATCC 24843) GN=SPCC24B10.20 PE=3 SV=1 4.69e-13	-	-	-
TRINITY_DN13133_c0_g1	91.96	17.9358	2.35816	0.000675391	0.0126828	up	cd00078, HECTc, HECT domain; C-terminal catalytic domain of a subclass of Ubiquitin-protein ligase (E3). It binds specific ubiquitin-conjugating enzymes (E2), accepts ubiquitin from E2, transfers ubiquitin to substrate lysine side chains, and transfers additional ubiquitin molecules to the end of growing ubiquitin chains. 4.49e-74	pfam00632, HECT, HECT-domain (ubiquitin-transferase). The name HECT comes from Homologous to the E6-AP Carboxyl Terminus. 2.42e-64	-	KOG0941, KOG0941, KOG0941, E3 ubiquitin protein ligase [Posttranslational modification, protein turnover, chaperones]. 3.28e-112	sp|O94275|MUG30_SCHPO Probable E3 ubiquitin-protein ligase mug30 OS=Schizosaccharomyces pombe (strain 972 / ATCC 24843) GN=mug30 PE=1 SV=1 9.23e-118	GO:0003674, molecular_function;GO:0003824, catalytic activity;GO:0004842, ubiquitin-protein transferase activity;GO:0005575, cellular_component;GO:0005622, intracellular;GO:0005623, cell;GO:0005628, prospore membrane;GO:0005737, cytoplasm;GO:0006464, cellular protein modification process;GO:0006807, nitrogen compound metabolic process;GO:0008150, biological_process;GO:0008152, metabolic process;G…	XP_039301583.1 LOW QUALITY PROTEIN: probable E3 ubiquitin-protein ligase mug30 [Nilaparvata lugens] 2.27e-253	-
TRINITY_DN13145_c0_g1	1.42862	4.22934	-1.56581	0.000955665	0.01631	down	cd00200, WD40, WD40 domain, found in a number of eukaryotic proteins that cover a wide variety of functions including adaptor/regulatory modules in signal transduction, pre-mRNA processing and cytoskeleton assembly; typically contains a GH dipeptide 11-24 residues from its N-terminus and the WD dipeptide at its C-terminus and is 40 residues long, hence the name WD40; between GH and WD lies a cons…	pfam00400, WD40, WD domain, G-beta repeat. 2.96e-06	-	KOG0266, KOG0266, KOG0266, WD40 repeat-containing protein [General function prediction only]. 4.56e-19	sp|Q00808|HETE1_PODAS Vegetative incompatibility protein HET-E-1 OS=Podospora anserina GN=HET-E1 PE=3 SV=1 1.81e-07	-	KAJ3031652.1 hypothetical protein HDU68_001732 [Siphonaria sp. JEL0065] 7.31e-34	-
TRINITY_DN13148_c0_g1	21.17	6.21109	1.76911	0.00284736	0.0359328	up	cd20568, CYCLIN_CLBs_yeast_rpt1, first cyclin box found in yeast B-type cyclins. This subfamily includes Saccharomyces cerevisiae G2/mitotic-specific cyclins 1-4 (ScCLB1-4), S-phase entry cyclins 5-6 (ScCLB5-6), and Schizosaccharomyces pombe G2/mitotic-specific cyclins, cig1, cig2 and cdc13. ScCLB1-4 are essential for the control of the cell cycle at the G2/M (mitosis) transition. They interact w…	pfam00134, Cyclin_N, Cyclin, N-terminal domain. Cyclins regulate cyclin dependent kinases (CDKs). Cyclin-0 (CCNO) is a Uracil-DNA glycosylase that is related to other cyclins. Cyclins contain two domains of similar all-alpha fold, of which this family corresponds with the N-terminal domain. 9.81e-41	-	KOG0653, KOG0653, KOG0653, Cyclin B and related kinase-activating proteins [Cell cycle control, cell division, chromosome partitioning]. 1.55e-51	sp|Q5A0A9|CG24_CANAL G2/mitotic-specific cyclin-4 OS=Candida albicans (strain SC5314 / ATCC MYA-2876) GN=CLB4 PE=1 SV=1 1.25e-99	GO:0000003, reproduction;GO:0000079, regulation of cyclin-dependent protein serine/threonine kinase activity;GO:0000086, G2/M transition of mitotic cell cycle;GO:0000278, mitotic cell cycle;GO:0000280, nuclear division;GO:0001932, regulation of protein phosphorylation;GO:0003674, molecular_function;GO:0005575, cellular_component;GO:0005622, intracellular;GO:0005623, cell;GO:0005634, nucleus;GO:00…	KAJ3023349.1 G2/mitotic-specific cyclin [Siphonaria sp. JEL0065] 6.62e-60	-
TRINITY_DN13148_c0_g2	7.07868	21.5636	-1.60704	0.000659182	0.0124212	down	-	-	-	-	-	-	-	-
TRINITY_DN13149_c0_g1	184.026	3484.3	-4.24289	5.76385e-10	1.18527e-07	down	-	-	-	-	-	-	-	-
TRINITY_DN13160_c0_g1	33.1039	84.987	-1.36024	0.000441503	0.00929231	down	-	-	-	-	-	-	-	-
TRINITY_DN13162_c0_g1	2.67912	9.69121	-1.85492	0.00238325	0.0319918	down	cd13851, CuRO_1_Fet3p, The first Cupredoxin domain of multicopper oxidase Fet3P. Fet3p catalyzes the ferroxidase reaction, which couples the oxidation of Fe(II) to Fe(III) and a four-electron reduction of molecular oxygen to water. Fet3p is a type I membrane protein with the amino-terminal oxidase domain in the exocellular space and the carboxyl terminus in the cytoplasm. The periplamic produced …	pfam07732, Cu-oxidase_3, Multicopper oxidase. This entry contains many divergent copper oxidase-like domains that are not recognized by the pfam00394 model. 5.77e-26	-	KOG1263, KOG1263, KOG1263, Multicopper oxidases [Secondary metabolites biosynthesis, transport and catabolism]. 5.97e-48	sp|Q4WZB4|ABR1_ASPFU Multicopper oxidase abr1 OS=Neosartorya fumigata (strain ATCC MYA-4609 / Af293 / CBS 101355 / FGSC A1100) GN=abr1 PE=2 SV=2 3.42e-107	GO:0006582, melanin metabolic process;GO:0006725, cellular aromatic compound metabolic process;GO:0008150, biological_process;GO:0008152, metabolic process;GO:0009058, biosynthetic process;GO:0009987, cellular process;GO:0018958, phenol-containing compound metabolic process;GO:0019438, aromatic compound biosynthetic process;GO:0019748, secondary metabolic process;GO:0042438, melanin biosynthetic …	XP_039299614.1 LOW QUALITY PROTEIN: iron transport multicopper oxidase fetC-like [Nilaparvata lugens] 6.91e-91	-
TRINITY_DN13165_c0_g1	17.8437	75.9418	-2.08948	3.54102e-06	0.000201903	down	cd05238, Gne_like_SDR_e, Escherichia coli Gne (a nucleoside-diphosphate-sugar 4-epimerase)-like, extended (e) SDRs. Nucleoside-diphosphate-sugar 4-epimerase has the characteristic active site tetrad and NAD-binding motif of the extended SDR, and is related to more specifically defined epimerases such as UDP-glucose 4 epimerase (aka UDP-galactose-4-epimerase), which catalyzes the NAD-dependent con…	pfam01370, Epimerase, NAD dependent epimerase/dehydratase family. This family of proteins utilize NAD as a cofactor. The proteins in this family use nucleotide-sugar substrates for a variety of chemical reactions. 3.19e-08	-	KOG1502, KOG1502, KOG1502, Flavonol reductase/cinnamoyl-CoA reductase [Defense mechanisms]. 2.90e-08	sp|P44094|Y1014_HAEIN Uncharacterized protein HI_1014 OS=Haemophilus influenzae (strain ATCC 51907 / DSM 11121 / KW20 / Rd) GN=HI_1014 PE=3 SV=1 7.71e-57	-	XP_037040107.1 D-erythronate dehydrogenase-like [Bradysia coprophila] 4.89e-96	-
TRINITY_DN13167_c0_g1	139.128	35.4472	1.97267	0.000610487	0.0118678	up	cd01866, Rab2, Rab GTPase family 2 (Rab2). Rab2 is localized on cis-Golgi membranes and interacts with Golgi matrix proteins. Rab2 is also implicated in the maturation of vesicular tubular clusters (VTCs), which are microtubule-associated intermediates in transport between the ER and Golgi apparatus. In plants, Rab2 regulates vesicle trafficking between the ER and the Golgi bodies and is importan…	pfam16192, PMT_4TMC, C-terminal four TMM region of protein-O-mannosyltransferase. PMT_4TMC is the C-terminal four membrane-pass region of protein-O-mannosyltransferases and similar enzymes. 3.43e-43	K00728-ko00514 Other types of O-glycan biosynthesis	KOG3359, KOG3359, KOG3359, Dolichyl-phosphate-mannose:protein O-mannosyl transferase [Posttranslational modification, protein turnover, chaperones]. 7.07e-170	sp|Q5ADM9|PMT2_CANAL Dolichyl-phosphate-mannose--protein mannosyltransferase 2 OS=Candida albicans (strain SC5314 / ATCC MYA-2876) GN=PMT2 PE=1 SV=1 0.0	GO:0000030, mannosyltransferase activity;GO:0003674, molecular_function;GO:0003824, catalytic activity;GO:0004169, dolichyl-phosphate-mannose-protein mannosyltransferase activity;GO:0005575, cellular_component;GO:0005622, intracellular;GO:0005623, cell;GO:0005737, cytoplasm;GO:0005783, endoplasmic reticulum;GO:0005789, endoplasmic reticulum membrane;GO:0005886, plasma membrane;GO:0006464, cellula…	KAJ3017975.1 Protein O-mannosyltransferase 2 [Siphonaria sp. JEL0065] 1.25e-181	-
TRINITY_DN13177_c0_g1	11.0511	45.2889	-2.03497	3.35033e-07	2.83963e-05	down	-	pfam03663, Glyco_hydro_76, Glycosyl hydrolase family 76. Family of alpha-1,6-mannanases. 4.11e-115	-	-	sp|P36091|DCW1_YEAST Mannan endo-1,6-alpha-mannosidase DCW1 OS=Saccharomyces cerevisiae (strain ATCC 204508 / S288c) GN=DCW1 PE=1 SV=1 1.61e-103	-	KAJ3014194.1 hydrolase 76 protein [Siphonaria sp. JEL0065] 7.73e-15	-
TRINITY_DN13177_c0_g2	22.8265	6.06378	1.91242	0.00244418	0.0324099	up	-	-	-	-	sp|A2QYU7|FAEC_ASPNC Probable feruloyl esterase C OS=Aspergillus niger (strain CBS 513.88 / FGSC A1513) GN=faeC PE=3 SV=1 4.28e-15	-	CAF1418382.1 unnamed protein product [Adineta steineri] >CAF3893746.1 unnamed protein product [Adineta steineri] 1.27e-32	-
TRINITY_DN13180_c0_g2	1.2287	12.4611	-3.34223	5.75858e-06	0.000310024	down	cd06206, bifunctional_CYPOR, These bifunctional proteins fuse N-terminal cytochrome p450 with a cytochrome p450 reductase (CYPOR). NADPH cytochrome p450 reductase serves as an electron donor in several oxygenase systems and is a component of nitric oxide synthases and methionine synthase reductases. CYPOR transfers two electrons from NADPH to the heme of cytochrome p450 via FAD and FMN. Ferredoxi…	pfam00067, p450, Cytochrome P450. Cytochrome P450s are haem-thiolate proteins involved in the oxidative degradation of various compounds. They are particularly well known for their role in the degradation of environmental toxins and mutagens. They can be divided into 4 classes, according to the method by which electrons from NAD(P)H are delivered to the catalytic site. Sequence conservation is re…	K14338-ko00380 Tryptophan metabolism;ko00071 Fatty acid degradation;ko00627 Aminobenzoate degradation	KOG1158, KOG1158, KOG1158, NADP/FAD dependent oxidoreductase [Energy production and conversion]. 7.13e-55	sp|Q9Y8G7|C505_FUSOX Bifunctional cytochrome P450/NADPH--P450 reductase OS=Fusarium oxysporum GN=CYP505 PE=1 SV=1 0.0	-	CAF1381027.1 unnamed protein product [Rotaria sordida] >CAF1616133.1 unnamed protein product [Rotaria sordida] 4.98e-194	-
TRINITY_DN13180_c1_g1	10.6042	166.921	-3.97645	1.27265e-17	1.45128e-14	down	cd11068, CYP120A1, cytochrome P450 family 102, subfamily A, polypeptide 1, also called bifunctional cytochrome P450/NADPH--P450 reductase. Cytochrome P450 102A1, also called cytochrome P450(BM-3) or P450BM-3, is a bifunctional cytochrome P450/NADPH--P450 reductase. These proteins fuse an N-terminal cytochrome p450 with a C-terminal cytochrome p450 reductase (CYPOR). It functions as a fatty acid m…	pfam00067, p450, Cytochrome P450. Cytochrome P450s are haem-thiolate proteins involved in the oxidative degradation of various compounds. They are particularly well known for their role in the degradation of environmental toxins and mutagens. They can be divided into 4 classes, according to the method by which electrons from NAD(P)H are delivered to the catalytic site. Sequence conservation is re…	K14338-ko00380 Tryptophan metabolism;ko00071 Fatty acid degradation;ko00627 Aminobenzoate degradation	KOG0157, KOG0157, KOG0157, Cytochrome P450 CYP4/CYP19/CYP26 subfamilies [Secondary metabolites biosynthesis, transport and catabolism, Lipid transport and metabolism]. 5.31e-32	sp|Q9Y8G7|C505_FUSOX Bifunctional cytochrome P450/NADPH--P450 reductase OS=Fusarium oxysporum GN=CYP505 PE=1 SV=1 0.0	-	CAF1029792.1 unnamed protein product [Adineta steineri] >CAF1100825.1 unnamed protein product [Adineta steineri] >CAF1104736.1 unnamed protein product [Adineta steineri] 2.48e-195	-
TRINITY_DN13194_c0_g1	1.41184	9.41895	-2.73799	8.97628e-07	6.47118e-05	down	cd14792, GH27, glycosyl hydrolase family 27 (GH27). GH27 enzymes occur in eukaryotes, prokaryotes, and archaea with a wide range of hydrolytic activities, including alpha-glucosidase (glucoamylase and sucrase-isomaltase), alpha-N-acetylgalactosaminidase, and 3-alpha-isomalto-dextranase. All GH27 enzymes cleave a terminal carbohydrate moiety from a substrate that varies considerably in size, depen…	pfam16499, Melibiase_2, Alpha galactosidase A. 7.42e-41	-	KOG2366, KOG2366, KOG2366, Alpha-D-galactosidase (melibiase) [Carbohydrate transport and metabolism]. 1.17e-58	sp|Q9P4V4|MEL_ZYGMR Alpha-galactosidase OS=Zygotorulaspora mrakii GN=MEL PE=3 SV=1 6.86e-115	-	KAJ3003789.1 hypothetical protein HDU68_005499, partial [Siphonaria sp. JEL0065] 1.37e-43	-
TRINITY_DN13201_c0_g1	42.8474	12.6615	1.75876	0.0033007	0.0397733	up	cd06152, YjgF_YER057c_UK114_like_4, YjgF, YER057c, and UK114 belong to a large family of proteins present in bacteria, archaea, and eukaryotes with no definitive function. The conserved domain is similar in structure to chorismate mutase but there is no sequence similarity and no functional connection. Members of this family have been implicated in isoleucine (Yeo7, Ibm1, aldR) and purine (YjgF) …	-	-	-	-	-	CAF1268126.1 unnamed protein product [Rotaria sordida] >CAF1340460.1 unnamed protein product [Rotaria sordida] >CAF1352956.1 unnamed protein product [Rotaria sordida] >CAF3920718.1 unnamed protein product [Rotaria sordida] >CAF3939279.1 unnamed protein product [Rotaria sordida] 3.04e-17	-
TRINITY_DN13209_c0_g3	2.7942	10.6492	-1.93024	1.72685e-05	0.000731812	down	-	-	-	-	-	-	-	-
TRINITY_DN13214_c0_g1	252.101	64.2631	1.97194	0.0031423	0.0384182	up	cd21092, TPT_S35C2, solute carrier family 35 member C2, member of the triose-phosphate transporter family. Solute carrier family 35 member C2 (S35C2 or Slc35c2), also called ovarian cancer-overexpressed gene 1 protein (OVCOV1), is a member of the triose-phosphate transporter (TPT) family, which is part of the drug/metabolite transporter (DMT) superfamily. It may function either as a GDP-fucose tr…	-	-	KOG1441, KOG1441, KOG1441, Glucose-6-phosphate/phosphate and phosphoenolpyruvate/phosphate antiporter [Carbohydrate transport and metabolism, Amino acid transport and metabolism]. 5.45e-22	sp|Q3E6T0|PT525_ARATH Probable sugar phosphate/phosphate translocator At5g25400 OS=Arabidopsis thaliana GN=At5g25400 PE=2 SV=1 3.74e-39	-	KAJ3025443.1 hypothetical protein HDU68_007127 [Siphonaria sp. JEL0065] 1.80e-52	-
TRINITY_DN13225_c0_g1	66.1902	157.325	-1.24906	0.00115918	0.0190823	down	cd06572, Histidinol_dh, Histidinol dehydrogenase, HisD, E.C 1.1.1.23. Histidinol dehydrogenase catalyzes the last two steps in the L-histidine biosynthesis pathway, which is conserved in bacteria, archaea, fungi, and plants. These last two steps are (i) the NAD-dependent oxidation of L-histidinol to L-histidinaldehyde, and (ii) the NAD-dependent oxidation of L-histidinaldehyde to L-histidine. In …	pfam00815, Histidinol_dh, Histidinol dehydrogenase. 4.10e-108	K14152-ko01230 Biosynthesis of amino acids;ko00340 Histidine metabolism	KOG2697, KOG2697, KOG2697, Histidinol dehydrogenase [Amino acid transport and metabolism]. 1.65e-149	sp|P07685|HIS2_NEUCR Histidine biosynthesis trifunctional protein OS=Neurospora crassa (strain ATCC 24698 / 74-OR23-1A / CBS 708.71 / DSM 1257 / FGSC 987) GN=his-3 PE=3 SV=3 0.0	GO:0000105, histidine biosynthetic process;GO:0003674, molecular_function;GO:0003824, catalytic activity;GO:0004399, histidinol dehydrogenase activity;GO:0004635, phosphoribosyl-AMP cyclohydrolase activity;GO:0004636, phosphoribosyl-ATP diphosphatase activity;GO:0005488, binding;GO:0005575, cellular_component;GO:0005622, intracellular;GO:0005623, cell;GO:0005737, cytoplasm;GO:0005829, cytosol;GO:…	KAJ3020518.1 trifunctional histidinol dehydrogenase [Siphonaria sp. JEL0065] 1.10e-231	-
TRINITY_DN13233_c0_g2	166.502	37.4496	2.15252	0.000626948	0.0121178	up	cd17502, MFS_Azr1_MDR_like, Saccharomyces cerevisiae Azole resistance protein 1 (Azr1p), and similar multidrug resistance (MDR) transporters of the Major Facilitator Superfamily. This subfamily is composed of multidrug resistance (MDR) transporters including various Saccharomyces cerevisiae proteins such as azole resistance protein 1 (Azr1p), vacuolar basic amino acid transporter 1 (Vba1p), vacuo…	pfam11951, Fungal_trans_2, Fungal specific transcription factor domain. This family of are likely to be transcription factors. This protein is found in fungi. Proteins in this family are typically between 454 to 826 amino acids in length. This protein is found associated with pfam00172. 1.77e-18	-	-	sp|B6HJU0|ROQT_PENRW Efflux pump roqT OS=Penicillium rubens (strain ATCC 28089 / DSM 1075 / NRRL 1951 / Wisconsin 54-1255) GN=roqT PE=1 SV=1 1.41e-74	-	KAJ3024382.1 hypothetical protein HDU68_008231 [Siphonaria sp. JEL0065] 6.88e-51	-
TRINITY_DN13234_c0_g1	5.84771	50.1798	-3.10116	8.4707e-06	0.000416692	down	cd10229, HSPA12_like_NBD, Nucleotide-binding domain of HSPA12A, HSPA12B and similar proteins. Human HSPA12A (also known as 70-kDa heat shock protein-12A) and HSPA12B (also known as 70-kDa heat shock protein-12B, chromosome 20 open reading frame 60/C20orf60, dJ1009E24.2) belong to the heat shock protein 70 (HSP70) family of chaperones that assist in protein folding and assembly, and can direct inc…	-	-	-	-	-	-	-
TRINITY_DN13240_c0_g1	0.925644	6.04978	-2.70835	1.05679e-07	1.07775e-05	down	-	pfam00732, GMC_oxred_N, GMC oxidoreductase. This family of proteins bind FAD as a cofactor. 5.01e-09	-	KOG1238, KOG1238, KOG1238, Glucose dehydrogenase/choline dehydrogenase/mandelonitrile lyase (GMC oxidoreductase family) [General function prediction only]. 1.23e-25	sp|Q00922|ALOX_CANBO Alcohol oxidase OS=Candida boidinii GN=AOD1 PE=1 SV=1 1.54e-103	-	MCL4135987.1 hypothetical protein [Idotea baltica] 1.56e-53	-
TRINITY_DN13241_c0_g1	2.67455	12.2898	-2.2001	1.20581e-06	8.24412e-05	down	cd17356, MFS_HXT, Fungal Hexose transporter subfamily of the Major Facilitator Superfamily of transporters and similar proteins. The fungal hexose transporter (HXT) subfamily is comprised of functionally redundant proteins that function mainly in the transport of glucose, as well as other sugars such as galactose and fructose. Saccharomyces cerevisiae has 20 genes that encode proteins in this fam…	pfam00083, Sugar_tr, Sugar (and other) transporter. 6.48e-55	-	KOG0254, KOG0254, KOG0254, Predicted transporter (major facilitator superfamily) [General function prediction only]. 4.91e-49	sp|P39932|STL1_YEAST Sugar transporter STL1 OS=Saccharomyces cerevisiae (strain ATCC 204508 / S288c) GN=STL1 PE=1 SV=2 5.03e-83	-	CAF0721232.1 unnamed protein product [Adineta ricciae] >CAF1303002.1 unnamed protein product [Adineta ricciae] 3.22e-41	-
TRINITY_DN13243_c0_g1	109.85	31.7634	1.7901	0.00140568	0.0221797	up	-	pfam11927, DUF3445, Protein of unknown function (DUF3445). This family of proteins are functionally uncharacterized. This protein is found in bacteria and eukaryotes. Proteins in this family are typically between 264 to 418 amino acids in length. This protein has a conserved RLP sequence motif. This protein has two completely conserved R residues that may be functionally important. 9.69e-37	-	-	sp|J9VLN4|CTR4_CRYNH Copper transport protein CTR4 OS=Cryptococcus neoformans var. grubii serotype A (strain H99 / ATCC 208821 / CBS 10515 / FGSC 9487) GN=CTR4 PE=1 SV=2 2.98e-17	-	CAF2706936.1 unnamed protein product [Rotaria sp. Silwood2] >CAF2858784.1 unnamed protein product [Rotaria sp. Silwood2] >CAF3437219.1 unnamed protein product [Rotaria sp. Silwood2] >CAF4352859.1 unnamed protein product [Rotaria sp. Silwood2] 1.75e-32	-
TRINITY_DN13247_c1_g1	205.819	42.5795	2.27315	0.000289491	0.00677496	up	-	-	K12763-ko04113 Meiosis - yeast	-	sp|A8JPF9|STUA_COLGL Cell pattern formation-associated protein STUA OS=Colletotrichum gloeosporioides GN=STUA PE=2 SV=2 0.0	GO:0000003, reproduction;GO:0000905, sporocarp development involved in asexual reproduction;GO:0003006, developmental process involved in reproduction;GO:0003674, molecular_function;GO:0003676, nucleic acid binding;GO:0003677, DNA binding;GO:0003700, DNA binding transcription factor activity;GO:0005488, binding;GO:0005575, cellular_component;GO:0005622, intracellular;GO:0005623, cell;GO:0005634, …	-	-
TRINITY_DN13249_c0_g1	97.1136	416.561	-2.10078	4.40521e-05	0.00155659	down	-	-	-	-	-	-	-	-
TRINITY_DN13256_c0_g1	0.935875	7.7249	-3.04513	1.22183e-06	8.28469e-05	down	-	-	-	-	-	-	-	-
TRINITY_DN13263_c0_g1	9.50047	139.894	-3.88019	4.78061e-11	1.42781e-08	down	-	-	-	-	-	-	-	-
TRINITY_DN13265_c0_g1	27.8749	6.14973	2.18037	0.00446456	0.0477031	up	cd01359, Argininosuccinate_lyase, Argininosuccinate lyase (argininosuccinase, ASAL). This group contains ASAL and related proteins. It is a member of the Lyase class I family. Members of this family for the most part catalyze similar beta-elimination reactions in which a C-N or C-O bond is cleaved with the release of fumarate as one of the products. These proteins are active as tetramers. The fou…	pfam00206, Lyase_1, Lyase. 4.06e-35	K01755-ko01230 Biosynthesis of amino acids;ko00250 Alanine, aspartate and glutamate metabolism;ko00220 Arginine biosynthesis	KOG1316, KOG1316, KOG1316, Argininosuccinate lyase [Amino acid transport and metabolism]. 0.0	sp|P50514|ARLZ_SCHPO Probable argininosuccinate lyase OS=Schizosaccharomyces pombe (strain 972 / ATCC 24843) GN=argx PE=3 SV=1 0.0	-	XP_021364765.1 argininosuccinate lyase-like [Mizuhopecten yessoensis] >XP_021364766.1 argininosuccinate lyase-like [Mizuhopecten yessoensis] >OWF44901.1 Argininosuccinate lyase [Mizuhopecten yessoensis] 1.89e-167	-
TRINITY_DN13284_c0_g1	0.696102	2.48361	-1.83507	0.00047195	0.00981782	down	cd14131, PKc_Mps1, Catalytic domain of the Dual-specificity Mitotic checkpoint protein kinase, Monopolar spindle 1 (also called TTK). Dual-specificity PKs catalyze the transfer of the gamma-phosphoryl group from ATP to serine/threonine as well as tyrosine residues on protein substrates. TTK/Mps1 is a spindle checkpoint kinase that was first discovered due to its necessity in centrosome duplicatio…	-	-	KOG0596, KOG0596, KOG0596, Dual specificity; serine/threonine and tyrosine kinase [Cell cycle control, cell division, chromosome partitioning]. 1.19e-07	-	-	-	-
TRINITY_DN13287_c0_g1	48.1398	183.655	-1.93169	6.02277e-06	0.000320125	down	cd11065, CYP64-like, cytochrome P450 family 64-like fungal cytochrome P450s. This group includes Aspergillus flavus cytochrome P450 64 (CYP64), also called O-methylsterigmatocystin (OMST) oxidoreductase or aflatoxin B synthase or aflatoxin biosynthesis protein Q, and similar fungal cytochrome P450s. CYP64 converts OMST to aflatoxin B1 and converts dihydro-O-methylsterigmatocystin (DHOMST) to afla…	pfam07994, NAD_binding_5, Myo-inositol-1-phosphate synthase. This is a family of myo-inositol-1-phosphate synthases. Inositol-1-phosphate catalyzes the conversion of glucose-6- phosphate to inositol-1-phosphate, which is then dephosphorylated to inositol. Inositol phosphates play an important role in signal transduction. 1.17e-17	-	KOG0693, KOG0693, KOG0693, Myo-inositol-1-phosphate synthase [Lipid transport and metabolism]. 0.0	sp|Q9LW96|INO1_TOBAC Inositol-3-phosphate synthase OS=Nicotiana tabacum PE=2 SV=1 1.33e-172	-	KAJ3615458.1 hypothetical protein Zmor_016402 [Zophobas morio] 4.28e-161	-
TRINITY_DN13294_c0_g1	289.825	737.417	-1.3473	0.000632645	0.0121716	down	cd05384, CAP_PRY1-like, CAP (cysteine-rich secretory proteins, antigen 5, and pathogenesis-related 1 proteins) domain of pathogen-related yeast 1 (PRY1) protein and similar fungal proteins. PRY1, also called pathogenesis-related protein 1, is a yeast protein that is up-regulated in core ESCRT mutants. It is a secreted protein required for efficient export of lipids such as acetylated sterols, and…	-	-	KOG3017, KOG3017, KOG3017, Defense-related protein containing SCP domain [Function unknown]. 2.73e-12	sp|D4B327|PRY1_ARTBC Probable pathogenesis-related protein ARB_02861 OS=Arthroderma benhamiae (strain ATCC MYA-4681 / CBS 112371) GN=ARB_02861 PE=3 SV=2 3.68e-26	-	XP_051164450.1 venom allergen 5-like [Leptopilina boulardi] 2.15e-11	-
TRINITY_DN13302_c0_g1	1.84904	8.32373	-2.17045	0.00118454	0.0193215	down	-	pfam06985, HET, Heterokaryon incompatibility protein (HET). This family represents a conserved region approximately 150 residues long within various heterokaryon incompatibility proteins that seem to be restricted to ascomycete fungi. Genetic differences in specific het genes prevent a viable heterokaryotic fungal cell from being formed by the fusion of filaments from two different wild-type stra…	-	-	sp|D4AS41|A7056_ARTBC Uncharacterized FAD-linked oxidoreductase ARB_02478 OS=Arthroderma benhamiae (strain ATCC MYA-4681 / CBS 112371) GN=ARB_07056 PE=1 SV=2 2.36e-07	-	CAF1052714.1 unnamed protein product [Didymodactylos carnosus] >CAF1204979.1 unnamed protein product [Didymodactylos carnosus] >CAF3819371.1 unnamed protein product [Didymodactylos carnosus] >CAF3969335.1 unnamed protein product [Didymodactylos carnosus] 4.81e-53	-
TRINITY_DN13319_c0_g1	39.7401	4.59203	3.11339	1.00924e-05	0.000479541	up	-	pfam11807, DUF3328, Domain of unknown function (DUF3328). This family of proteins are functionally uncharacterized. This family is only found in eukaryotes. 7.45e-30	-	-	-	-	-	-
TRINITY_DN13326_c0_g1	5.77135	12.4026	-1.10366	0.00152525	0.0236791	down	-	pfam02207, zf-UBR, Putative zinc finger in N-recognin (UBR box). This region is found in E3 ubiquitin ligases that recognize N-recognins. 5.70e-13	-	-	sp|P91133|UBR1_CAEEL E3 ubiquitin-protein ligase ubr-1 OS=Caenorhabditis elegans GN=ubr-1 PE=1 SV=2 4.78e-07	-	KAJ3010375.1 hypothetical protein HDU68_002167 [Siphonaria sp. JEL0065] 3.04e-169	-
TRINITY_DN13330_c0_g1	30.1729	9.62261	1.64875	0.00354492	0.0417535	up	-	-	-	-	-	-	CAF1173199.1 unnamed protein product [Adineta steineri] >CAF1404202.1 unnamed protein product [Adineta steineri] 3.95e-28	-
TRINITY_DN13339_c0_g4	176.05	368.536	-1.06582	0.00176945	0.0264552	down	-	pfam00926, DHBP_synthase, 3,4-dihydroxy-2-butanone 4-phosphate synthase. 3,4-Dihydroxy-2-butanone 4-phosphate is biosynthesized from ribulose 5-phosphate and serves as the biosynthetic precursor for the xylene ring of riboflavin. Sometimes found as a bifunctional enzyme with pfam00925. 1.40e-63	K02858-ko00740 Riboflavin metabolism	KOG1284, KOG1284, KOG1284, Bifunctional GTP cyclohydrolase II/3,4-dihydroxy-2butanone-4-phosphate synthase [Coenzyme transport and metabolism]. 8.66e-47	sp|Q8TG90|RIB3_MAGO7 3,4-dihydroxy-2-butanone 4-phosphate synthase OS=Magnaporthe oryzae (strain 70-15 / ATCC MYA-4617 / FGSC 8958) GN=RIB3 PE=1 SV=1 6.78e-118	GO:0003674, molecular_function;GO:0003824, catalytic activity;GO:0005575, cellular_component;GO:0005576, extracellular region;GO:0005622, intracellular;GO:0005623, cell;GO:0005737, cytoplasm;GO:0005739, mitochondrion;GO:0005740, mitochondrial envelope;GO:0005758, mitochondrial intermembrane space;GO:0005829, cytosol;GO:0006091, generation of precursor metabolites and energy;GO:0006766, vitamin me…	KAJ3011883.1 hypothetical protein HDU68_001478 [Siphonaria sp. JEL0065] 9.43e-53	-
TRINITY_DN13343_c0_g1	1.31693	4.41313	-1.74462	0.00370341	0.0428813	down	cd05235, SDR_e1, extended (e) SDRs, subgroup 1. This family consists of an SDR module of multidomain proteins identified as putative polyketide sythases fatty acid synthases (FAS), and nonribosomal peptide synthases, among others. However, unlike the usual ketoreductase modules of FAS and polyketide synthase, these domains are related to the extended SDRs, and have canonical NAD(P)-binding motifs…	pfam00501, AMP-binding, AMP-binding enzyme. 3.76e-07	-	KOG1177, KOG1177, KOG1177, Long chain fatty acid acyl-CoA ligase [Lipid transport and metabolism]. 1.81e-14	sp|Q5BEJ6|AFOE_EMENI Iterative polyketide synthase afoE OS=Emericella nidulans (strain FGSC A4 / ATCC 38163 / CBS 112.46 / NRRL 194 / M139) GN=afoE PE=1 SV=1 1.97e-50	-	CAF1060984.1 unnamed protein product [Adineta steineri] >CAF1108005.1 unnamed protein product [Adineta steineri] 7.16e-60	-
TRINITY_DN13348_c0_g1	13.4336	0.377472	5.15334	0.000797095	0.0142432	up	cd01665, Cyt_c_Oxidase_III, Cytochrome c oxidase subunit III. Cytochrome c oxidase (CcO), the terminal oxidase in the respiratory chains of eukaryotes and most bacteria, is a multi-chain transmembrane protein located in the inner membrane of mitochondria and the cell membrane of prokaryotes. CcO catalyzes the reduction of O2 and simultaneously pumps protons across the membrane. The number of subu…	pfam00510, COX3, Cytochrome c oxidase subunit III. 3.32e-75	K02262-ko00190 Oxidative phosphorylation;ko04260 Cardiac muscle contraction	KOG4664, KOG4664, KOG4664, Cytochrome oxidase subunit III and related proteins [Energy production and conversion]. 1.33e-90	sp|P00414|COX3_HUMAN Cytochrome c oxidase subunit 3 OS=Homo sapiens GN=MT-CO3 PE=1 SV=2 1.93e-129	GO:0005575, cellular_component;GO:0005622, intracellular;GO:0005623, cell;GO:0005737, cytoplasm;GO:0005739, mitochondrion;GO:0005740, mitochondrial envelope;GO:0005743, mitochondrial inner membrane;GO:0008150, biological_process;GO:0008535, respiratory chain complex IV assembly;GO:0009987, cellular process;GO:0016020, membrane;GO:0016043, cellular component organization;GO:0017004, cytochrome com…	BAM25206.1 cytochrome c oxidase subunit III [Homo sapiens] >BAM25271.1 cytochrome c oxidase subunit III [Homo sapiens] 5.28e-169	Homo sapiens isolate PNG94 haplogroup P1d mitochondrion, complete genome 0.0
TRINITY_DN13349_c0_g1	30.0486	8.67597	1.7922	0.0043959	0.0474137	up	cd11062, CYP58-like, cytochrome P450 family 58-like fungal cytochrome P450s. This group includes Fusarium sporotrichioides cytochrome P450 58 (CYP58, also known as Tri4 and trichodiene oxygenase), and similar fungal proteins. CYP58 catalyzes the oxygenation of trichodiene during the biosynthesis of trichothecenes, which are sesquiterpenoid toxins that act by inhibiting protein biosynthesis. The C…	pfam18558, HTH_51, Helix-turn-helix domain. This is helix turn helix domain found in polyketide synthases (PKSs) in fungi. They are multidomain enzymes that biosynthesize a wide range of natural products. Family members include citrinin polyketide synthases which contain a C-methyltransferase (CMeT) domain pfam08242 that adds one or more S-adenosylmethionine (SAM)-derived methyl groups to the car…	-	KOG0159, KOG0159, KOG0159, Cytochrome P450 CYP11/CYP12/CYP24/CYP27 subfamilies [Secondary metabolites biosynthesis, transport and catabolism]. 4.67e-10	sp|Q5ATJ7|AUSA_EMENI Non-reducing polyketide synthase ausA OS=Emericella nidulans (strain FGSC A4 / ATCC 38163 / CBS 112.46 / NRRL 194 / M139) GN=ausA PE=1 SV=1 1.08e-63	-	MCL4105700.1 hypothetical protein [Idotea baltica] 6.48e-30	-
TRINITY_DN13354_c0_g1	0.107343	0.907267	-3.07929	0.00111478	0.0184483	down	cd06179, MFS_TRI12_like, Fungal trichothecene efflux pump (TRI12) of the Major Facilitator Superfamily of transporters. This family includes Fusarium sporotrichioides trichothecene efflux pump (TRI12), which may play a role in F. sporotrichioides self-protection against trichothecenes. TRI12 belongs to the Major Facilitator Superfamily (MFS) of membrane transport proteins, which are thought to fu…	pfam06609, TRI12, Fungal trichothecene efflux pump (TRI12). This family consists of several fungal specific trichothecene efflux pump proteins. Many of the genes involved in trichothecene toxin biosynthesis in Fusarium sporotrichioides are present within a gene cluster.It has been suggested that TRI12 may play a role in F. sporotrichioides self-protection against trichothecenes. 3.38e-07	-	-	sp|Q10072|YAN6_SCHPO Uncharacterized transporter C3H1.06c OS=Schizosaccharomyces pombe (strain 972 / ATCC 24843) GN=SPAC3H1.06c PE=3 SV=1 8.38e-37	-	KAJ3020485.1 hypothetical protein HDU68_010156 [Siphonaria sp. JEL0065] 1.97e-45	-
TRINITY_DN13364_c0_g2	5.78884	11.8223	-1.03016	0.00203157	0.0287631	down	cd05943, AACS, Acetoacetyl-CoA synthetase (acetoacetate-CoA ligase, AACS). AACS is a cytosolic ligase that specifically activates acetoacetate to its coenzyme A ester by a two-step reaction. Acetoacetate first reacts with ATP to form an acyl-adenylate intermediate, which then reacts with CoA to produce an acyl-CoA ester. This is the first step of the mevalonate pathway of isoprenoid biosynthesis …	-	K01907-ko00280 Valine, leucine and isoleucine degradation;ko00650 Butanoate metabolism	KOG1175, KOG1175, KOG1175, Acyl-CoA synthetase [Lipid transport and metabolism]. 1.68e-31	sp|Q5ZLG0|AACS_CHICK Acetoacetyl-CoA synthetase OS=Gallus gallus GN=AACS PE=2 SV=1 1.69e-137	-	XP_036077091.1 acetoacetyl-CoA synthetase isoform X2 [Rousettus aegyptiacus] 2.12e-140	-
TRINITY_DN13379_c1_g4	753.107	2280.61	-1.59849	0.000164197	0.00440895	down	-	pfam11034, Grg1, Glucose-repressible protein Grg1. This fungal protein increases during glucose deprivation. Its function is unknown. 8.79e-20	K02923-ko03010 Ribosome	KOG3499, KOG3499, KOG3499, 60S ribosomal protein L38 [Translation, ribosomal structure and biogenesis]. 9.76e-11	sp|Q9C2B9|RL38_NEUCR 60S ribosomal protein L38 OS=Neurospora crassa (strain ATCC 24698 / 74-OR23-1A / CBS 708.71 / DSM 1257 / FGSC 987) GN=rpl-38 PE=3 SV=1 3.60e-25	GO:0002181, cytoplasmic translation;GO:0003674, molecular_function;GO:0003676, nucleic acid binding;GO:0003723, RNA binding;GO:0003735, structural constituent of ribosome;GO:0005198, structural molecule activity;GO:0005488, binding;GO:0005575, cellular_component;GO:0005622, intracellular;GO:0005623, cell;GO:0005737, cytoplasm;GO:0005829, cytosol;GO:0005840, ribosome;GO:0006412, translation;GO:000…	KAF3428214.1 hypothetical protein E2986_11738 [Frieseomelitta varia] 1.47e-14	-
TRINITY_DN13379_c1_g9	3.82138	0.216757	4.13995	0.000160257	0.00432316	up	-	pfam06985, HET, Heterokaryon incompatibility protein (HET). This family represents a conserved region approximately 150 residues long within various heterokaryon incompatibility proteins that seem to be restricted to ascomycete fungi. Genetic differences in specific het genes prevent a viable heterokaryotic fungal cell from being formed by the fusion of filaments from two different wild-type stra…	-	-	sp|Q9UV10|HET6_NEUCR Heterokaryon incompatibility protein 6, OR allele OS=Neurospora crassa (strain ATCC 24698 / 74-OR23-1A / CBS 708.71 / DSM 1257 / FGSC 987) GN=het-6 PE=4 SV=1 8.49e-30	-	KAI1691421.1 heterokaryon incompatibility protein (HET) domain-containing protein [Ditylenchus destructor] 1.02e-192	-
TRINITY_DN13385_c0_g1	1.85788	17.2324	-3.2134	1.14872e-11	4.50296e-09	down	-	-	-	KOG3135, KOG3135, KOG3135, 1,4-benzoquinone reductase-like; Trp repressor binding protein-like/protoplast-secreted protein [General function prediction only]. 6.15e-61	sp|P42058|ALTA7_ALTAL Minor allergen Alt a 7 OS=Alternaria alternata GN=ALTA7 PE=1 SV=1 4.31e-69	-	CAF2346962.1 unnamed protein product [Rotaria sp. Silwood2] >CAF2573084.1 unnamed protein product [Rotaria sp. Silwood2] >CAF2817002.1 unnamed protein product [Rotaria sp. Silwood2] >CAF2965940.1 unnamed protein product [Rotaria sp. Silwood2] >CAF3947141.1 unnamed protein product [Rotaria sp. Silwood2] 5.64e-53	-
TRINITY_DN13393_c0_g2	0.355187	4.81514	-3.76093	8.71345e-07	6.3919e-05	down	-	-	-	-	-	-	-	-
TRINITY_DN13417_c0_g2	8.6677	17.778	-1.03638	0.000581625	0.0114437	down	-	-	-	-	-	-	-	-
TRINITY_DN13422_c0_g1	0.988243	3.75627	-1.92636	0.00101317	0.0170364	down	cd08297, CAD3, Cinnamyl alcohol dehydrogenases (CAD). These alcohol dehydrogenases are related to the cinnamyl alcohol dehydrogenases (CAD), members of the medium chain dehydrogenase/reductase family. NAD(P)(H)-dependent oxidoreductases are the major enzymes in the interconversion of alcohols and aldehydes, or ketones. Cinnamyl alcohol dehydrogenases (CAD) reduce cinnamaldehydes to cinnamyl alcoh…	pfam08240, ADH_N, Alcohol dehydrogenase GroES-like domain. This is the catalytic domain of alcohol dehydrogenases. Many of them contain an inserted zinc binding domain. This domain has a GroES-like structure. 4.40e-10	K13953-ko00010 Glycolysis / Gluconeogenesis;ko00350 Tyrosine metabolism;ko00071 Fatty acid degradation;ko00830 Retinol metabolism;ko00626 Naphthalene degradation;ko01220 Degradation of aromatic compounds;ko00625 Chloroalkane and chloroalkene degradation;ko00982 Drug metabolism - cytochrome P450;ko00980 Metabolism of xenobiotics by cytochrome P450	KOG0023, KOG0023, KOG0023, Alcohol dehydrogenase, class V [Secondary metabolites biosynthesis, transport and catabolism]. 8.53e-53	sp|O00097|ADH1_PICST Alcohol dehydrogenase 1 OS=Scheffersomyces stipitis (strain ATCC 58785 / CBS 6054 / NBRC 10063 / NRRL Y-11545) GN=ADH1 PE=3 SV=1 6.76e-55	-	KAI6214406.1 hypothetical protein M3Y94_00264500 [Aphelenchoides besseyi] >KAI6236143.1 alcohol dehydrogenase [Aphelenchoides besseyi] 5.80e-57	-
TRINITY_DN13427_c0_g1	16.2043	6.05631	1.41987	0.00291967	0.0367096	up	-	pfam09365, DUF2461, Conserved hypothetical protein (DUF2461). Members of this family are widely (though sparsely) distributed bacterial proteins, about 230 residues in length. All members have a motif RxxRDxRFxxx[DN]KxxY. The function of this protein family is unknown. 1.57e-50	-	-	-	-	CAF3891206.1 unnamed protein product [Rotaria sp. Silwood1] >CAF5034246.1 unnamed protein product [Rotaria sp. Silwood1] 5.88e-12	-
TRINITY_DN13433_c0_g2	71.1004	21.8593	1.70161	0.00355892	0.0418399	up	-	-	-	-	-	-	-	-
TRINITY_DN13454_c0_g1	3.99072	25.4852	-2.67493	6.87286e-06	0.000357731	down	-	-	-	-	-	-	-	-
TRINITY_DN13463_c0_g1	61.3136	247.862	-2.01526	0.000230199	0.00572939	down	-	-	-	-	-	-	-	-
TRINITY_DN13464_c0_g1	13.5181	1.08499	3.63914	0.000173658	0.00460542	up	cd17388, MFS_TetA, Tetracycline resistance protein TetA and related proteins of the Major Facilitator Superfamily of transporters. This subfamily is composed of tetracycline resistance proteins similar to Escherichia coli TetA(A), TetA(B), and TetA(E), which are metal-tetracycline/H(+) antiporters that confer resistance to tetracycline by an active tetracycline efflux, which is an energy-dependen…	pfam13377, Peripla_BP_3, Periplasmic binding protein-like domain. Thi domain is found in a variety of transcriptional regulatory proteins. It is related to bacterial periplasmic binding proteins, although this domain is unlikely to be found in the periplasm. This domain likely acts to bind a small molecule ligand that the DNA-binding domain responds to. 1.48e-18	-	-	sp|P62594|BLAT_SALTI Beta-lactamase TEM OS=Salmonella typhi GN=bla PE=3 SV=1 0.0	-	XP_037877434.1 beta-lactamase TEM-like [Bombyx mori] 3.25e-156	Homo sapiens plasmid mCherry donor, complete sequence 3.56e-59
TRINITY_DN13467_c1_g1	16.3138	2.91034	2.48683	2.40358e-05	0.000942203	up	sd00045, ANK, ankyrin repeats. Ankyrin repeats are one of the most abundant repeat motifs, and generally function as scaffolds for protein-protein interactions in processes including cell cycle, transcriptional regulation, signal transduction, vesicular trafficking, and inflammatory response. Although predominantly found in eukaryotic proteins, they are also found in some bacterial and viral prot…	pfam14420, Clr5, Clr5 domain. This domain is found at the N-terminus of the Clr5 protein which has been shown to be involved in silencing in fission yeast. This domain has been found to often be associated with proteins that contain ankyrin repeats and large regions of disordered sequence. 1.09e-08	-	KOG4177, KOG4177, KOG4177, Ankyrin [Cell wall/membrane/envelope biogenesis]. 1.12e-08	sp|D7UQ40|SOL5_ALTSO Bifunctional solanapyrone synthase OS=Alternaria solani GN=sol5 PE=1 SV=1 2.40e-27	-	CAF4004686.1 unnamed protein product [Adineta steineri] 1.51e-34	-
TRINITY_DN13477_c0_g1	2.23463	8.88291	-1.99099	0.000611176	0.0118678	down	-	-	-	-	-	-	-	-
TRINITY_DN13487_c0_g1	489.156	111.919	2.12783	0.00438239	0.0474137	up	-	-	-	-	-	-	-	-
TRINITY_DN13488_c0_g1	1.37379	3.70797	-1.43246	0.00198937	0.0283254	down	cd02012, TPP_TK, Thiamine pyrophosphate (TPP) family, Transketolase (TK) subfamily, TPP-binding module; TK catalyzes the transfer of a two-carbon unit from ketose phosphates to aldose phosphates. In heterotrophic organisms, TK provides a link between glycolysis and the pentose phosphate pathway and provides precursors for nucleotide, aromatic amino acid and vitamin biosynthesis. In addition, the …	pfam00456, Transketolase_N, Transketolase, thiamine diphosphate binding domain. This family includes transketolase enzymes EC:2.2.1.1. and also partially matches to 2-oxoisovalerate dehydrogenase beta subunit EC:1.2.4.4. Both these enzymes utilize thiamine pyrophosphate as a cofactor, suggesting there may be common aspects in their mechanism of catalysis. 1.81e-06	K00615-ko01200 Carbon metabolism;ko01051 Biosynthesis of ansamycins;ko00710 Carbon fixation in photosynthetic organisms;ko00030 Pentose phosphate pathway;ko01230 Biosynthesis of amino acids	KOG0523, KOG0523, KOG0523, Transketolase [Carbohydrate transport and metabolism]. 1.67e-38	sp|P23254|TKT1_YEAST Transketolase 1 OS=Saccharomyces cerevisiae (strain ATCC 204508 / S288c) GN=TKL1 PE=1 SV=4 3.78e-12	GO:0003674, molecular_function;GO:0003824, catalytic activity;GO:0004802, transketolase activity;GO:0005575, cellular_component;GO:0005622, intracellular;GO:0005623, cell;GO:0005634, nucleus;GO:0005737, cytoplasm;GO:0006081, cellular aldehyde metabolic process;GO:0006098, pentose-phosphate shunt;GO:0006139, nucleobase-containing compound metabolic process;GO:0006725, cellular aromatic compound me…	XP_049849171.1 uncharacterized protein LOC126318198 [Schistocerca gregaria] 1.04e-78	-
TRINITY_DN13495_c0_g1	519.402	2831.88	-2.44684	3.10251e-06	0.000180175	down	cd05283, CAD1, Cinnamyl alcohol dehydrogenases (CAD). Cinnamyl alcohol dehydrogenases (CAD), members of the medium chain dehydrogenase/reductase family, reduce cinnamaldehydes to cinnamyl alcohols in the last step of monolignal metabolism in plant cells walls. CAD binds 2 zinc ions and is NADPH- dependent. CAD family members are also found in non-plant species, e.g. in yeast where they have an al…	pfam08240, ADH_N, Alcohol dehydrogenase GroES-like domain. This is the catalytic domain of alcohol dehydrogenases. Many of them contain an inserted zinc binding domain. This domain has a GroES-like structure. 4.31e-13	K00002-ko00930 Caprolactam degradation;ko00010 Glycolysis / Gluconeogenesis;ko01220 Degradation of aromatic compounds;ko00040 Pentose and glucuronate interconversions;ko00561 Glycerolipid metabolism	KOG0023, KOG0023, KOG0023, Alcohol dehydrogenase, class V [Secondary metabolites biosynthesis, transport and catabolism]. 1.97e-64	sp|Q04894|ADH6_YEAST NADP-dependent alcohol dehydrogenase 6 OS=Saccharomyces cerevisiae (strain ATCC 204508 / S288c) GN=ADH6 PE=1 SV=1 9.99e-69	-	KAG4069194.1 hypothetical protein HA402_012047 [Bradysia odoriphaga] 8.41e-57	-
TRINITY_DN13503_c0_g1	32.6083	186.528	-2.51608	3.70547e-05	0.00133952	down	-	pfam08743, Nse4_C, Nse4 C-terminal. Nse4 is a component of the Smc5/6 DNA repair complex. It forms interactions with Smc5 and Nse1. The exact function of this highly conserved C-terminal domain is not known. 4.62e-18	-	KOG2866, KOG2866, KOG2866, Uncharacterized conserved protein [Function unknown]. 7.76e-14	sp|P50276|MUP1_YEAST High-affinity methionine permease OS=Saccharomyces cerevisiae (strain ATCC 204508 / S288c) GN=MUP1 PE=1 SV=1 1.46e-79	-	XP_039299719.1 LOW QUALITY PROTEIN: high-affinity methionine permease-like [Nilaparvata lugens] 2.09e-68	-
TRINITY_DN13513_c0_g1	9.33773	66.6269	-2.83496	0.0008845	0.01541	down	-	-	-	-	-	-	-	-
TRINITY_DN13534_c0_g1	15.9144	4.89178	1.7019	0.00474432	0.0496768	up	cd16688, RING-H2_Vps11, RING finger, H2 subclass, found in vacuolar protein sorting-associated protein 11 homolog (Vps11) and similar proteins. Vps11, also known as RING finger protein 108 (RNF108), is a soluble protein involved in regulation of glycolipid degradation and retrograde toxin transport. It is highly expressed in heart and pancreas. Vps11 associates with Vps16, Vps18, and Vps33 to for…	pfam12451, VPS11_C, Vacuolar protein sorting protein 11 C terminal. This domain family is found in eukaryotes, and is approximately 50 amino acids in length. Vps 11 is one of the evolutionarily conserved class C vacuolar protein sorting genes (c-vps: vps11, vps16, vps18, and vps33), whose products physically associate to form the c-vps protein complex required for vesicle docking and fusion. 1.29…	-	KOG2114, KOG2114, KOG2114, Vacuolar assembly/sorting protein PEP5/VPS11 [Intracellular trafficking, secretion, and vesicular transport]. 2.48e-145	sp|Q91W86|VPS11_MOUSE Vacuolar protein sorting-associated protein 11 homolog OS=Mus musculus GN=Vps11 PE=1 SV=3 1.35e-47	GO:0000322, storage vacuole;GO:0000323, lytic vacuole;GO:0000324, fungal-type vacuole;GO:0000329, fungal-type vacuole membrane;GO:0003674, molecular_function;GO:0003824, catalytic activity;GO:0004842, ubiquitin-protein transferase activity;GO:0005488, binding;GO:0005515, protein binding;GO:0005575, cellular_component;GO:0005622, intracellular;GO:0005623, cell;GO:0005737, cytoplasm;GO:0005768, end…	XP_039301162.1 LOW QUALITY PROTEIN: uncharacterized protein LOC111061121 [Nilaparvata lugens] 0.0	-
TRINITY_DN13539_c0_g1	2.89857	65.4242	-4.49641	1.70516e-07	1.57276e-05	down	-	-	-	-	-	-	-	-
TRINITY_DN13540_c1_g1	7.57819	0.257663	4.8783	0.00297837	0.0372119	up	-	pfam00361, Proton_antipo_M, Proton-conducting membrane transporter. This is a family of membrane transporters that inlcudes some 7 of potentially 14-16 TM regions. In many instances the family forms part of complex I that catalyzes the transfer of two electrons from NADH to ubiquinone in a reaction that is associated with proton translocation across the membrane, and in this context is a combinat…	K03881-ko00190 Oxidative phosphorylation	KOG4845, KOG4845, KOG4845, NADH dehydrogenase, subunit 4 [Energy production and conversion]. 2.22e-71	sp|P03905|NU4M_HUMAN NADH-ubiquinone oxidoreductase chain 4 OS=Homo sapiens GN=MT-ND4 PE=1 SV=1 1.06e-179	GO:0001666, response to hypoxia;GO:0001701, in utero embryonic development;GO:0003674, molecular_function;GO:0003824, catalytic activity;GO:0003954, NADH dehydrogenase activity;GO:0005575, cellular_component;GO:0005622, intracellular;GO:0005623, cell;GO:0005737, cytoplasm;GO:0005739, mitochondrion;GO:0005740, mitochondrial envelope;GO:0005743, mitochondrial inner membrane;GO:0005746, mitochondria…	BAM25209.1 NADH dehydrogenase subunit 4 [Homo sapiens] >BAM25274.1 NADH dehydrogenase subunit 4 [Homo sapiens] 5.24e-277	Homo sapiens isolate 246_Sb haplogroup U5a2b1f mitochondrion, complete genome 0.0
TRINITY_DN13561_c0_g1	39.3283	9.29761	2.08063	0.000526267	0.0106476	up	-	pfam08314, Sec39, Secretory pathway protein Sec39. Mnaimneh et al identified Sec39p as a protein involved in ER-Golgi transport in a large scale promoter shut down analysis of essential yeast genes. Kraynack et al. (2005) showed that Sec39p (Dsl3p) is required for Golgi-ER retrograde transport and is part of a very stable protein complex that also includes Dsl1p (in mammals ZW10), Tip20p (Rint-1)…	-	-	sp|O14266|SEC39_SCHPO Protein transport protein sec39 OS=Schizosaccharomyces pombe (strain 972 / ATCC 24843) GN=sec39 PE=3 SV=1 5.59e-11	-	CAF1675403.1 unnamed protein product, partial [Adineta ricciae] 1.37e-51	-
TRINITY_DN13571_c0_g1	23.7982	102.199	-2.10245	3.05963e-05	0.00115255	down	cd02932, OYE_YqiM_FMN, Old yellow enzyme (OYE) YqjM-like FMN binding domain. YqjM is involved in the oxidative stress response of Bacillus subtilis. Like the other OYE members, each monomer of YqjM contains FMN as a non-covalently bound cofactor and uses NADPH as a reducing agent. The YqjM enzyme exists as a homotetramer that is assembled as a dimer of catalytically dependent dimers, while other …	pfam00724, Oxidored_FMN, NADH:flavin oxidoreductase / NADH oxidase family. 2.32e-35	-	KOG0134, KOG0134, KOG0134, NADH:flavin oxidoreductase/12-oxophytodienoate reductase [Energy production and conversion, General function prediction only]. 7.48e-29	sp|B8N8Q9|AFVA_ASPFN NADPH dehydrogenase afvA OS=Aspergillus flavus (strain ATCC 200026 / FGSC A1120 / NRRL 3357 / JCM 12722 / SRRC 167) GN=afvA PE=2 SV=1 0.0	-	XP_037030047.1 NADPH dehydrogenase-like [Bradysia coprophila] 1.83e-93	-
TRINITY_DN13586_c0_g1	8.0007	58.9305	-2.88082	8.23191e-08	8.75094e-06	down	-	-	-	-	sp|Q54H55|Y8969_DICDI FAD-linked oxidoreductase DDB_G0289697 OS=Dictyostelium discoideum GN=DDB_G0289697 PE=2 SV=1 1.07e-22	-	GFS06379.1 FAD linked oxidase [Elysia marginata] 6.31e-39	-
TRINITY_DN13588_c0_g1	48.9645	187.112	-1.9341	1.61804e-08	2.14495e-06	down	-	pfam02781, G6PD_C, Glucose-6-phosphate dehydrogenase, C-terminal domain. 1.55e-91	K00036-ko01200 Carbon metabolism;ko00480 Glutathione metabolism;ko00030 Pentose phosphate pathway	KOG0563, KOG0563, KOG0563, Glucose-6-phosphate 1-dehydrogenase [Carbohydrate transport and metabolism]. 3.73e-163	sp|P48826|G6PD_ASPNG Glucose-6-phosphate 1-dehydrogenase OS=Aspergillus niger GN=gsdA PE=2 SV=1 1.78e-09	GO:0000166, nucleotide binding;GO:0000302, response to reactive oxygen species;GO:0002262, myeloid cell homeostasis;GO:0002376, immune system process;GO:0002520, immune system development;GO:0003674, molecular_function;GO:0003824, catalytic activity;GO:0004345, glucose-6-phosphate dehydrogenase activity;GO:0005488, binding;GO:0005515, protein binding;GO:0005536, glucose binding;GO:0005575, cellul…	XP_039301385.1 LOW QUALITY PROTEIN: glucose-6-phosphate 1-dehydrogenase [Nilaparvata lugens] 8.27e-252	PREDICTED: Ailuropoda melanoleuca glucose-6-phosphate dehydrogenase (G6PD), transcript variant X5, mRNA 2.78e-31
TRINITY_DN13596_c0_g3	84.3057	13.5875	2.63335	1.02268e-05	0.000484092	up	-	-	-	-	-	-	-	-
TRINITY_DN13605_c0_g2	17.5003	47.6705	-1.44572	0.00139246	0.0219988	down	cd03369, ABCC_NFT1, ATP-binding cassette domain 2 of NFT1, subfamily C. Domain 2 of NFT1 (New full-length MRP-type transporter 1). NFT1 belongs to the MRP (multidrug resistance-associated protein) family of ABC transporters. Some of the MRP members have five additional transmembrane segments in their N-terminus, but the function of these additional membrane-spanning domains is not clear. The MRP …	pfam00005, ABC_tran, ABC transporter. ABC transporters for a large family of proteins responsible for translocation of a variety of compounds across biological membranes. ABC transporters are the largest family of proteins in many completely sequenced bacteria. ABC transporters are composed of two copies of this domain and two copies of a transmembrane domain pfam00664. These four domains may bel…	-	KOG0054, KOG0054, KOG0054, Multidrug resistance-associated protein/mitoxantrone resistance protein, ABC superfamily [Secondary metabolites biosynthesis, transport and catabolism]. 4.19e-172	sp|Q92337|ABC1_SCHPO ATP-binding cassette transporter abc1 OS=Schizosaccharomyces pombe (strain 972 / ATCC 24843) GN=abc1 PE=3 SV=1 0.0	GO:0000322, storage vacuole;GO:0000323, lytic vacuole;GO:0000324, fungal-type vacuole;GO:0000329, fungal-type vacuole membrane;GO:0003674, molecular_function;GO:0003824, catalytic activity;GO:0005215, transporter activity;GO:0005575, cellular_component;GO:0005622, intracellular;GO:0005623, cell;GO:0005737, cytoplasm;GO:0005773, vacuole;GO:0005774, vacuolar membrane;GO:0006810, transport;GO:000681…	CAD7571179.1 unnamed protein product [Timema californicum] 1.71e-155	-
TRINITY_DN13642_c2_g4	25.3298	5.9748	2.08387	0.00196853	0.0282209	up	sd00010, SLR, Sel1-like repeat. Sel1-like repeats (SLRs) share similar alpha-helical conformations with Tetratricopeptide repeats (TPRs), but with different consensus sequence lengths and superhelical topologies. SLRs contain 36 to 44 amino acids and are present in bacteria and eukaryotes but not in archaea. SLR proteins are involved in a variety of functions, and many serve as adaptor proteins f…	-	-	-	sp|P87159|NIF1_SCHPO Mitosis inhibitor nif1 OS=Schizosaccharomyces pombe (strain 972 / ATCC 24843) GN=nif1 PE=1 SV=1 9.55e-14	-	APD25631.1 dissatisfaction [Nilaparvata lugens] 1.36e-207	-
TRINITY_DN13645_c0_g1	12.8804	61.9229	-2.2653	3.52062e-05	0.00128292	down	-	-	-	-	sp|P49412|PRIB_LENED Protein priB OS=Lentinula edodes GN=priB PE=2 SV=1 1.62e-18	-	-	-
TRINITY_DN13646_c1_g2	4.45564	0.766724	2.53885	0.00223178	0.0305961	up	-	-	-	-	-	-	-	-
TRINITY_DN13646_c2_g4	122.975	32.4078	1.92395	0.00433077	0.0471163	up	cd00200, WD40, WD40 domain, found in a number of eukaryotic proteins that cover a wide variety of functions including adaptor/regulatory modules in signal transduction, pre-mRNA processing and cytoskeleton assembly; typically contains a GH dipeptide 11-24 residues from its N-terminus and the WD dipeptide at its C-terminus and is 40 residues long, hence the name WD40; between GH and WD lies a cons…	pfam04053, Coatomer_WDAD, Coatomer WD associated region. This region is composed of WD40 repeats. 3.56e-113	-	KOG0276, KOG0276, KOG0276, Vesicle coat complex COPI, beta' subunit [Intracellular trafficking, secretion, and vesicular transport]. 0.0	sp|O42937|COPB2_SCHPO Probable coatomer subunit beta' OS=Schizosaccharomyces pombe (strain 972 / ATCC 24843) GN=sec27 PE=3 SV=2 0.0	GO:0003674, molecular_function;GO:0005488, binding;GO:0005515, protein binding;GO:0005575, cellular_component;GO:0005622, intracellular;GO:0005623, cell;GO:0005737, cytoplasm;GO:0005794, Golgi apparatus;GO:0005798, Golgi-associated vesicle;GO:0006810, transport;GO:0006886, intracellular protein transport;GO:0006888, ER to Golgi vesicle-mediated transport;GO:0006890, retrograde vesicle-mediated tr…	XP_011404238.1 PREDICTED: coatomer subunit beta'-like [Amphimedon queenslandica] 7.39e-255	-
TRINITY_DN13646_c2_g8	37.6501	95.1561	-1.33764	1.23767e-05	0.000562422	down	cd04730, NPD_like, 2-Nitropropane dioxygenase (NPD), one of the nitroalkane oxidizing enzyme families, catalyzes oxidative denitrification of nitroalkanes to their corresponding carbonyl compounds and nitrites. NDP is a member of the NAD(P)H-dependent flavin oxidoreductase family that reduce a range of alternative electron acceptors. Most use FAD/FMN as a cofactor and NAD(P)H as electron donor. S…	pfam03060, NMO, Nitronate monooxygenase. Nitronate monooxygenase (NMO), formerly referred to as 2-nitropropane dioxygenase (NPD) (EC:1.13.11.32), is an FMN-dependent enzyme that uses molecular oxygen to oxidize (anionic) alkyl nitronates and, in the case of the enzyme from Neurospora crassa, (neutral) nitroalkanes to the corresponding carbonyl compounds and nitrite. Previously classified as 2-nit…	-	-	sp|Q9I4V0|2NPD_PSEAE Nitronate monooxygenase OS=Pseudomonas aeruginosa (strain ATCC 15692 / PAO1 / 1C / PRS 101 / LMG 12228) GN=PA1024 PE=1 SV=1 3.15e-69	-	KAJ3031646.1 hypothetical protein HDU68_001726 [Siphonaria sp. JEL0065] 5.20e-57	-
TRINITY_DN13651_c5_g1	1.07188	13.2262	-3.62519	3.71311e-08	4.35301e-06	down	-	-	-	KOG2820, KOG2820, KOG2820, FAD-dependent oxidoreductase [General function prediction only]. 9.30e-39	sp|P40854|MSOX_STRSB Monomeric sarcosine oxidase OS=Streptomyces sp. (strain KB210-8SY) GN=soxA PE=1 SV=2 3.70e-53	-	XP_022096174.1 uncharacterized protein LOC110982213 [Acanthaster planci] 1.35e-77	-
TRINITY_DN13652_c0_g1	12.0994	32.683	-1.4336	7.29594e-05	0.0022823	down	cd02231, cupin_BLL6423-like, Bradyrhizobium japonicum BLL6423 and related proteins, cupin domain. This family includes bacterial and fungal proteins homologous to BLL6423, a Bradyrhizobium japonicum protein of unknown function; it includes a structure of an uncharacterized protein from Novosphingobium aromaticivorans. Proteins in this family belong to the cupin superfamily with a conserved "jelly…	-	-	-	-	-	-	-
TRINITY_DN13659_c0_g1	347.911	1204.58	-1.79174	0.000677609	0.0126896	down	cd14499, CDC14_C, C-terminal dual-specificity phosphatase domain of CDC14 family proteins. The cell division control protein 14 (CDC14) family is highly conserved in all eukaryotes, although the roles of its members seem to have diverged during evolution. Yeast Cdc14, the best characterized member of this family, is a dual-specificity phosphatase that plays key roles in cell cycle control. It pre…	pfam14671, DSPn, Dual specificity protein phosphatase, N-terminal half. The active core of the dual specificity protein phosphatase is made up of two globular domains both with the DSP-like fold. This family represents the N-terminal half of the core. These domains are arranged in tandem, and are associated via an extensive interface to form a single globular whole. The conserved PTP signature mo…	K06639-ko04111 Cell cycle - yeast;ko04110 Cell cycle;ko04113 Meiosis - yeast	KOG1720, KOG1720, KOG1720, Protein tyrosine phosphatase CDC14 [Defense mechanisms]. 2.19e-53	sp|Q5B323|CDC14_EMENI Tyrosine-protein phosphatase cdcA OS=Emericella nidulans (strain FGSC A4 / ATCC 38163 / CBS 112.46 / NRRL 194 / M139) GN=cdcA PE=3 SV=1 8.22e-174	GO:0000003, reproduction;GO:0000022, mitotic spindle elongation;GO:0000070, mitotic sister chromatid segregation;GO:0000075, cell cycle checkpoint;GO:0000212, meiotic spindle organization;GO:0000226, microtubule cytoskeleton organization;GO:0000228, nuclear chromosome;GO:0000278, mitotic cell cycle;GO:0000280, nuclear division;GO:0000281, mitotic cytokinesis;GO:0000775, chromosome, centromeric re…	XP_019645521.1 PREDICTED: dual specificity protein phosphatase CDC14A-like isoform X5 [Branchiostoma belcheri] 7.45e-51	-
TRINITY_DN13660_c0_g1	129.763	635.638	-2.29233	0.000352247	0.00784528	down	cd06622, PKc_PBS2_like, Catalytic domain of fungal PBS2-like dual-specificity Mitogen-Activated Protein Kinase Kinases. PKs catalyze the transfer of the gamma-phosphoryl group from ATP to serine/threonine (ST) or tyrosine residues on protein substrates. Members of this group include the MAPKKs Polymyxin B resistance protein 2 (PBS2) from Saccharomyces cerevisiae, Wis1 from Schizosaccharomyces pom…	pfam18132, Tyosinase_C, Tyosinase C-terminal domain. This is the C-terminal domain of Tyosinase present in Aspergillus oryzae. Tyosinase is a dinuclear copper monooxygenase/oxidase that plays a crucial role in the melanin pigment biosynthesis. The C-terminal domain is referred to as the shielding domain as it prohibits substrate access to the enzyme-active site and blocks the oxidase/oxygenase ac…	-	KOG0594, KOG0594, KOG0594, Protein kinase PCTAIRE and related kinases [General function prediction only]. 1.72e-11	sp|P00440|TYRO_NEUCR Tyrosinase OS=Neurospora crassa (strain ATCC 24698 / 74-OR23-1A / CBS 708.71 / DSM 1257 / FGSC 987) GN=T PE=1 SV=5 3.54e-92	-	KAJ3032121.1 hypothetical protein HDU68_004431 [Siphonaria sp. JEL0065] 1.38e-18	-
TRINITY_DN13669_c1_g1	43.5958	133.13	-1.61058	1.4129e-05	0.000619699	down	sd00006, TPR, Tetratricopeptide repeat. The Tetratricopeptide repeat (TPR) typically contains 34 amino acids and is found in a variety of organisms including bacteria, cyanobacteria, yeast, fungi, plants, and humans. It is present in a variety of proteins including those involved in chaperone, cell-cycle, transcription, and protein transport complexes. The number of TPR motifs varies among protei…	-	K13342-ko04146 Peroxisome	KOG1125, KOG1125, KOG1125, TPR repeat-containing protein [General function prediction only]. 1.03e-66	sp|Q99144|PEX5_YARLI Peroxisomal targeting signal receptor OS=Yarrowia lipolytica (strain CLIB 122 / E 150) GN=PAY32 PE=3 SV=1 7.31e-128	GO:0000268, peroxisome targeting sequence binding;GO:0003674, molecular_function;GO:0005048, signal sequence binding;GO:0005052, peroxisome matrix targeting signal-1 binding;GO:0005488, binding;GO:0005515, protein binding;GO:0005575, cellular_component;GO:0005622, intracellular;GO:0005623, cell;GO:0005737, cytoplasm;GO:0005777, peroxisome;GO:0005778, peroxisomal membrane;GO:0005829, cytosol;GO:00…	CAH1240223.1 PEX5 [Branchiostoma lanceolatum] 2.99e-71	-
TRINITY_DN13673_c4_g3	3.64868	31.6014	-3.11454	0.000877594	0.0153109	down	-	-	-	-	-	-	-	-
TRINITY_DN13673_c4_g5	7.71652	41.6726	-2.43308	9.4557e-07	6.73933e-05	down	cd05286, QOR2, Quinone oxidoreductase (QOR). Quinone oxidoreductase (QOR) and 2-haloacrylate reductase. QOR catalyzes the conversion of a quinone + NAD(P)H to a hydroquinone + NAD(P)+. Quinones are cyclic diones derived from aromatic compounds. Membrane bound QOR actin the respiratory chains of bacteria and mitochondria, while soluble QOR acts to protect from toxic quinones (e.g. DT-diaphorase) o…	pfam00107, ADH_zinc_N, Zinc-binding dehydrogenase. 4.33e-10	-	KOG1197, KOG1197, KOG1197, Predicted quinone oxidoreductase [Energy production and conversion, General function prediction only]. 1.46e-54	sp|O74489|QOR_SCHPO Probable quinone oxidoreductase OS=Schizosaccharomyces pombe (strain 972 / ATCC 24843) GN=zta1 PE=1 SV=2 3.41e-49	GO:0003674, molecular_function;GO:0003676, nucleic acid binding;GO:0003723, RNA binding;GO:0003824, catalytic activity;GO:0003960, NADPH:quinone reductase activity;GO:0005488, binding;GO:0005575, cellular_component;GO:0005622, intracellular;GO:0005623, cell;GO:0005634, nucleus;GO:0005737, cytoplasm;GO:0006950, response to stress;GO:0006979, response to oxidative stress;GO:0008150, biological_proc…	KAJ3023497.1 hypothetical protein HDU68_008596 [Siphonaria sp. JEL0065] 1.31e-45	-
TRINITY_DN13684_c0_g1	5.24028	22.1054	-2.07668	3.09803e-07	2.66176e-05	down	-	-	-	-	-	-	-	-
TRINITY_DN13694_c0_g2	18.178	3.17218	2.51865	0.000113076	0.00323102	up	-	-	-	-	-	-	-	-
TRINITY_DN13698_c2_g2	4.86831	12.9245	-1.40862	0.000195481	0.00501454	down	-	-	-	-	-	-	-	-
TRINITY_DN13699_c1_g2	4.24272	19.0816	-2.16912	0.00440697	0.0474923	down	-	-	-	-	sp|A1DGN0|CUTI1_NEOFI Probable cutinase 1 OS=Neosartorya fischeri (strain ATCC 1020 / DSM 3700 / FGSC A1164 / NRRL 181) GN=NFIA_084890 PE=3 SV=1 2.36e-14	-	-	-
TRINITY_DN13700_c1_g1	3.2577	0.310184	3.39266	0.00134629	0.0214858	up	-	-	-	-	-	GO:0005575, cellular_component;GO:0005622, intracellular;GO:0005623, cell;GO:0005634, nucleus;GO:0043226, organelle;GO:0043227, membrane-bounded organelle;GO:0043229, intracellular organelle;GO:0043231, intracellular membrane-bounded organelle;GO:0044424, intracellular part;GO:0044464, cell part	XP_045739620.1 eukaryotic translation initiation factor 5B-like [Mirounga angustirostris] 1.52e-57	Homo sapiens prothymosin alpha (PTMA), transcript variant 2, mRNA 0.0
TRINITY_DN13700_c1_g5	11.4032	0.474548	4.58674	0.00318175	0.0388248	up	cd01663, Cyt_c_Oxidase_I, Cytochrome C oxidase subunit I. Cytochrome c oxidase (CcO), the terminal oxidase in the respiratory chains of eukaryotes and most bacteria, is a multi-chain transmembrane protein located in the inner membrane of mitochondria and the cell membrane of prokaryotes. It catalyzes the reduction of O2 and simultaneously pumps protons across the membrane. The number of subunits …	pfam00115, COX1, Cytochrome C and Quinol oxidase polypeptide I. 3.19e-81	K02256-ko04260 Cardiac muscle contraction;ko00190 Oxidative phosphorylation	KOG4769, KOG4769, KOG4769, Cytochrome c oxidase, subunit I [Energy production and conversion]. 4.48e-43	sp|P00395|COX1_HUMAN Cytochrome c oxidase subunit 1 OS=Homo sapiens GN=MT-CO1 PE=1 SV=1 0.0	GO:0003674, molecular_function;GO:0003824, catalytic activity;GO:0004129, cytochrome-c oxidase activity;GO:0005215, transporter activity;GO:0005575, cellular_component;GO:0005622, intracellular;GO:0005623, cell;GO:0005737, cytoplasm;GO:0005739, mitochondrion;GO:0005740, mitochondrial envelope;GO:0005743, mitochondrial inner membrane;GO:0005746, mitochondrial respiratory chain;GO:0005750, mitochon…	AAK17768.1 cytochrome c oxidase subunit I [Homo sapiens] >AAP89610.1 cytochrome c oxidase subunit I [Homo sapiens] >AAP89623.1 cytochrome c oxidase subunit I [Homo sapiens] >AAP89636.1 cytochrome c oxidase subunit I [Homo sapiens] >AAP89649.1 cytochrome c oxidase subunit I [Homo sapiens] 0.0	Homo sapiens isolate PNG9 haplogroup E1a2a1 mitochondrion, complete genome 0.0
TRINITY_DN13700_c1_g7	5.7484	0.192388	4.90107	0.000293713	0.00686096	up	cd00284, Cytochrome_b_N, Cytochrome b (N-terminus)/b6/petB: Cytochrome b is a subunit of cytochrome bc1, an 11-subunit mitochondrial respiratory enzyme. Cytochrome b spans the mitochondrial membrane with 8 transmembrane helices (A-H) in eukaryotes. In plants and cyanobacteria, cytochrome b6 is analogous to eukaryote cytochrome b, containing two chains: helices A-D are encoded by the petB gene and…	pfam00033, Cytochrome_B, Cytochrome b/b6/petB. 1.77e-52	K03883-ko00190 Oxidative phosphorylation	KOG4663, KOG4663, KOG4663, Cytochrome b [Energy production and conversion]. 4.20e-65	sp|P03915|NU5M_HUMAN NADH-ubiquinone oxidoreductase chain 5 OS=Homo sapiens GN=MT-ND5 PE=1 SV=2 0.0	GO:0000302, response to reactive oxygen species;GO:0001666, response to hypoxia;GO:0003674, molecular_function;GO:0003824, catalytic activity;GO:0003954, NADH dehydrogenase activity;GO:0005575, cellular_component;GO:0005622, intracellular;GO:0005623, cell;GO:0005737, cytoplasm;GO:0005739, mitochondrion;GO:0005740, mitochondrial envelope;GO:0005743, mitochondrial inner membrane;GO:0005746, mitocho…	AFO26771.1 NADH dehydrogenase subunit 5 [Homo sapiens] 2.01e-256	Homo sapiens isolate DSM_1067 mitochondrion, complete genome 0.0
TRINITY_DN13705_c0_g2	108.122	19.5147	2.47003	0.000518667	0.0105278	up	-	pfam06985, HET, Heterokaryon incompatibility protein (HET). This family represents a conserved region approximately 150 residues long within various heterokaryon incompatibility proteins that seem to be restricted to ascomycete fungi. Genetic differences in specific het genes prevent a viable heterokaryotic fungal cell from being formed by the fusion of filaments from two different wild-type stra…	-	-	-	-	KAI1693513.1 heterokaryon incompatibility protein (HET) domain-containing protein [Ditylenchus destructor] 2.07e-25	-
TRINITY_DN13710_c0_g1	6.84471	15.3896	-1.1689	0.00444818	0.0476906	down	-	pfam09507, CDC27, DNA polymerase subunit Cdc27. This protein forms the C subunit of DNA polymerase delta. It carries the essential residues for binding to the Pol1 subunit of polymerase alpha, from residues 293-332, which are characterized by the motif D--G--VT, referred to as the DPIM motif. The first 160 residues of the protein form the minimal domain for binding to the B subunit, Cdc1, of poly…	K03504-ko03420 Nucleotide excision repair;ko03440 Homologous recombination;ko00230 Purine metabolism;ko03430 Mismatch repair;ko03410 Base excision repair;ko03030 DNA replication;ko00240 Pyrimidine metabolism	-	-	GO:0000228, nuclear chromosome;GO:0000278, mitotic cell cycle;GO:0000731, DNA synthesis involved in DNA repair;GO:0005575, cellular_component;GO:0005622, intracellular;GO:0005623, cell;GO:0005634, nucleus;GO:0005657, replication fork;GO:0005694, chromosome;GO:0006139, nucleobase-containing compound metabolic process;GO:0006259, DNA metabolic process;GO:0006260, DNA replication;GO:0006261, DNA-dep…	-	-
TRINITY_DN13711_c2_g3	146.414	27.7178	2.40117	0.000210424	0.00533245	up	cd00692, ligninase, Ligninase and other manganese-dependent fungal peroxidases. Ligninases and related extracellular fungal peroxidases belong to class II of the plant heme-dependent peroxidase superfamily. All members of the superfamily share a heme prosthetic group and catalyze a multistep oxidative reaction involving hydrogen peroxide as the electron acceptor. Class II peroxidases are fungal g…	pfam03031, NIF, NLI interacting factor-like phosphatase. This family contains a number of NLI interacting factor isoforms and also an N-terminal regions of RNA polymerase II CTC phosphatase and FCP1 serine phosphatase. This region has been identified as the minimal phosphatase domain. 4.67e-11	-	KOG0323, KOG0323, KOG0323, TFIIF-interacting CTD phosphatases, including NLI-interacting factor [Transcription]. 1.51e-09	sp|Q9P376|FCP1_SCHPO RNA polymerase II subunit A C-terminal domain phosphatase OS=Schizosaccharomyces pombe (strain 972 / ATCC 24843) GN=fcp1 PE=1 SV=1 9.53e-110	GO:0000428, DNA-directed RNA polymerase complex;GO:0003674, molecular_function;GO:0003824, catalytic activity;GO:0004721, phosphoprotein phosphatase activity;GO:0004722, protein serine/threonine phosphatase activity;GO:0005575, cellular_component;GO:0005622, intracellular;GO:0005623, cell;GO:0005634, nucleus;GO:0005654, nucleoplasm;GO:0005737, cytoplasm;GO:0005829, cytosol;GO:0006355, regulation …	XP_018496382.2 RNA polymerase II subunit A C-terminal domain phosphatase [Galendromus occidentalis] 5.46e-61	-
TRINITY_DN13711_c2_g5	24.0925	6.3279	1.92879	0.00382282	0.0437133	up	cd14011, PK_SCY1_like, Pseudokinase domain of Scy1-like proteins. The pseudokinase domain shows similarity to protein kinases but lacks crucial residues for catalytic activity. This subfamily is composed of the catalytically inactive kinases with similarity to yeast Scy1. It includes four mammalian proteins called SCY1-like protein 1 (SCYL1), SCYL2, SCYL3, as well as Testis-EXpressed protein 14 (…	-	-	KOG2137, KOG2137, KOG2137, Protein kinase [Signal transduction mechanisms]. 2.60e-52	sp|Q9P7X5|PPK32_SCHPO Protein kinase domain-containing protein ppk32 OS=Schizosaccharomyces pombe (strain 972 / ATCC 24843) GN=ppk32 PE=1 SV=1 7.28e-70	GO:0000166, nucleotide binding;GO:0003674, molecular_function;GO:0003824, catalytic activity;GO:0004672, protein kinase activity;GO:0004674, protein serine/threonine kinase activity;GO:0005488, binding;GO:0005524, ATP binding;GO:0005575, cellular_component;GO:0005622, intracellular;GO:0005623, cell;GO:0005737, cytoplasm;GO:0005829, cytosol;GO:0006464, cellular protein modification process;GO:0006…	CAH1785559.1 unnamed protein product, partial [Owenia fusiformis] 1.50e-67	-
TRINITY_DN13711_c2_g7	47.7527	14.2027	1.74942	0.00231896	0.0314476	up	-	-	-	-	-	-	-	-
TRINITY_DN13716_c0_g1	1.4246	3.08012	-1.11243	0.00427879	0.0467944	down	cd17327, MFS_FEN2_like, Pantothenate transporter FEN2 and similar transporters of the Major Facilitator Superfamily. This family is composed of Saccharomyces cerevisiae pantothenate transporter FEN2 (or fenpropimorph resistance protein 2) and similar proteins from fungi and bacteria including fungal vitamin H transporter, allantoate permease, and high-affinity nicotinic acid transporter, as well …	pfam00083, Sugar_tr, Sugar (and other) transporter. 1.80e-46	-	KOG2533, KOG2533, KOG2533, Permease of the major facilitator superfamily [Carbohydrate transport and metabolism]. 1.17e-58	sp|Q10097|YAOI_SCHPO Uncharacterized transporter C11D3.18C OS=Schizosaccharomyces pombe (strain 972 / ATCC 24843) GN=SPAC11D3.18c PE=3 SV=1 9.74e-73	-	CAF1145905.1 unnamed protein product [Adineta steineri] >CAF3632570.1 unnamed protein product [Adineta steineri] 1.33e-118	-
TRINITY_DN13717_c0_g1	1.38977	3.02242	-1.12086	0.00447286	0.0477511	down	cd00833, PKS, polyketide synthases (PKSs) polymerize simple fatty acids into a large variety of different products, called polyketides, by successive decarboxylating Claisen condensations. PKSs can be divided into 2 groups, modular type I PKSs consisting of one or more large multifunctional proteins and iterative type II PKSs, complexes of several monofunctional subunits. 9.80e-102	pfam00109, ketoacyl-synt, Beta-ketoacyl synthase, N-terminal domain. The structure of beta-ketoacyl synthase is similar to that of the thiolase family (pfam00108) and also chalcone synthase. The active site of beta-ketoacyl synthase is located between the N and C-terminal domains. The N-terminal domain contains most of the structures involved in dimer formation and also the active site cysteine. …	-	KOG1202, KOG1202, KOG1202, Animal-type fatty acid synthase and related proteins [Lipid transport and metabolism]. 7.85e-49	sp|Q8J0F5|MLCB_PENCI Compactin diketide synthase mokB OS=Penicillium citrinum GN=mlcB PE=1 SV=1 0.0	-	CAH1230559.1 FASN [Branchiostoma lanceolatum] 8.45e-240	-
TRINITY_DN13719_c2_g2	33.8251	4.77473	2.8246	0.00383474	0.0437455	up	-	-	-	-	sp|Q9UV10|HET6_NEUCR Heterokaryon incompatibility protein 6, OR allele OS=Neurospora crassa (strain ATCC 24698 / 74-OR23-1A / CBS 708.71 / DSM 1257 / FGSC 987) GN=het-6 PE=4 SV=1 3.22e-10	-	KAI1691421.1 heterokaryon incompatibility protein (HET) domain-containing protein [Ditylenchus destructor] 5.00e-10	-
TRINITY_DN13719_c2_g3	11.3182	3.1468	1.84669	0.00272462	0.035018	up	cd06179, MFS_TRI12_like, Fungal trichothecene efflux pump (TRI12) of the Major Facilitator Superfamily of transporters. This family includes Fusarium sporotrichioides trichothecene efflux pump (TRI12), which may play a role in F. sporotrichioides self-protection against trichothecenes. TRI12 belongs to the Major Facilitator Superfamily (MFS) of membrane transport proteins, which are thought to fu…	pfam06609, TRI12, Fungal trichothecene efflux pump (TRI12). This family consists of several fungal specific trichothecene efflux pump proteins. Many of the genes involved in trichothecene toxin biosynthesis in Fusarium sporotrichioides are present within a gene cluster.It has been suggested that TRI12 may play a role in F. sporotrichioides self-protection against trichothecenes. 3.25e-08	-	-	sp|Q9HE13|YI32_SCHPO Uncharacterized MFS-type transporter C1399.02 OS=Schizosaccharomyces pombe (strain 972 / ATCC 24843) GN=SPAC1399.02 PE=3 SV=1 1.47e-38	-	KAJ3010587.1 hypothetical protein HDU68_002075 [Siphonaria sp. JEL0065] 8.32e-46	-
TRINITY_DN13719_c2_g5	1.39973	7.50858	-2.42339	0.000128172	0.00357288	down	-	-	-	-	-	-	-	-
TRINITY_DN13723_c0_g1	126.851	746.301	-2.55663	3.30683e-05	0.00121344	down	cd06183, cyt_b5_reduct_like, Cytochrome b5 reductase catalyzes the reduction of 2 molecules of cytochrome b5 using NADH as an electron donor. Like ferredoxin reductases, these proteins have an N-terminal FAD binding subdomain and a C-terminal NADH binding subdomain, separated by a cleft, which accepts FAD. The NADH-binding moiety interacts with part of the FAD and resembles a Rossmann fold. Howev…	pfam00175, NAD_binding_1, Oxidoreductase NAD-binding domain. Xanthine dehydrogenases, that also bind FAD/NAD, have essentially no similarity. 2.87e-28	-	KOG0534, KOG0534, KOG0534, NADH-cytochrome b-5 reductase [Coenzyme transport and metabolism, Energy production and conversion]. 1.87e-68	sp|Q9UR35|NCB5R_MORAP NADH-cytochrome b5 reductase 1 OS=Mortierella alpina GN=CBR1 PE=2 SV=1 8.25e-75	-	KAJ3012910.1 NADH-cytochrome b5 reductase [Siphonaria sp. JEL0065] 8.30e-67	-
TRINITY_DN13726_c4_g1	4.31112	17.8068	-2.04629	2.99214e-06	0.000174574	down	cd03792, GT4_trehalose_phosphorylase, trehalose phosphorylase and similar proteins. Trehalose phosphorylase (TP) reversibly catalyzes trehalose synthesis and degradation from alpha-glucose-1-phosphate (alpha-Glc-1-P) and glucose. The catalyzing activity includes the phosphorolysis of trehalose, which produce alpha-Glc-1-P and glucose, and the subsequent synthesis of trehalose. This family is most…	-	-	-	sp|O75003|TREPH_GRIFR Trehalose phosphorylase OS=Grifola frondosa PE=1 SV=1 3.82e-18	-	-	-
TRINITY_DN13726_c5_g7	98.2509	24.6553	1.99457	0.000517525	0.0105216	up	cd09535, SAM_BOI-like_fungal, SAM domain of BOI-like fungal subfamily. SAM (sterile alpha motif) domain of BOI-like fungal subfamily is a potential protein-protein interaction domain. Proteins of this subfamily are apparently scaffold proteins, since most contain SH3 and PH domains, which are also protein-protein interaction domains, in addition to SAM domain. BOI-like proteins participate in cel…	-	-	-	sp|O74653|POB1_SCHPO Protein pob1 OS=Schizosaccharomyces pombe (strain 972 / ATCC 24843) GN=pob1 PE=1 SV=1 4.11e-09	-	-	-
TRINITY_DN13736_c0_g1	14.7519	149.456	-3.34075	1.19454e-06	8.23315e-05	down	-	-	-	-	-	-	-	-
TRINITY_DN13738_c0_g1	51.3511	177.014	-1.7854	0.000704823	0.0129928	down	-	pfam00732, GMC_oxred_N, GMC oxidoreductase. This family of proteins bind FAD as a cofactor. 9.09e-14	K17066-ko00680 Methane metabolism;ko01200 Carbon metabolism	KOG1238, KOG1238, KOG1238, Glucose dehydrogenase/choline dehydrogenase/mandelonitrile lyase (GMC oxidoreductase family) [General function prediction only]. 3.93e-31	sp|P04842|ALOX1_PICPG Alcohol oxidase 1 OS=Komagataella pastoris (strain GS115 / ATCC 20864) GN=AOX1 PE=1 SV=2 4.83e-07	-	KAG1713677.1 Alcohol dehydrogenase [acceptor] [Nymphon striatum] 7.25e-57	-
TRINITY_DN13739_c0_g2	10.7009	2.43746	2.13428	0.000755047	0.0136278	up	cd03145, GAT1_cyanophycinase, Type 1 glutamine amidotransferase (GATase1)-like domain found in cyanophycinase. Type 1 glutamine amidotransferase (GATase1)-like domain found in cyanophycinase. This group contains proteins similar to the extracellular cyanophycinases from Pseudomonas anguilliseptica BI (CphE) and Synechocystis sp. PCC 6803 CphB. Cyanophycinases are intracellular exopeptidases which…	pfam02913, FAD-oxidase_C, FAD linked oxidases, C-terminal domain. This domain has a ferredoxin-like fold. 1.88e-12	-	KOG1232, KOG1232, KOG1232, Proteins containing the FAD binding domain [Energy production and conversion]. 3.76e-14	sp|Q94AX4|DLD_ARATH D-lactate dehydrogenase [cytochrome], mitochondrial OS=Arabidopsis thaliana GN=DLD PE=1 SV=1 3.69e-63	-	KAG1654433.1 Autoinducer 2 sensor kinase/phosphatase LuxQ [Nymphon striatum] 1.35e-57	-
TRINITY_DN13741_c1_g1	26.8389	131.437	-2.29197	3.47314e-06	0.000198936	down	cd19147, AKR_AKR9A3_9B1-4, Phanerochaete chrysosporium aryl-alcohol dehydrogenase [NADP(+)] (AAD) and similar proteins. Phanerochaete chrysosporium ADD (EC1.1.1.91) is a founding member of aldo-keto reductase family 9 member A3. It is involved in lignin degradation and reduces aromatic benzaldehydes to their respective alcohols in the presence of NADP(H). This family also includes Saccharomyces c…	pfam00248, Aldo_ket_red, Aldo/keto reductase family. This family includes a number of K+ ion channel beta chain regulatory domains - these are reported to have oxidoreductase activity. 2.56e-37	-	KOG1575, KOG1575, KOG1575, Voltage-gated shaker-like K+ channel, subunit beta/KCNAB [Energy production and conversion]. 1.29e-59	sp|P42884|AAD14_YEAST Putative aryl-alcohol dehydrogenase AAD14 OS=Saccharomyces cerevisiae (strain ATCC 204508 / S288c) GN=AAD14 PE=1 SV=1 5.19e-164	-	CAF1126690.1 unnamed protein product [Adineta steineri] >CAF3671896.1 unnamed protein product [Adineta steineri] 1.52e-121	-
TRINITY_DN13747_c0_g1	40.138	80.389	-1.00203	0.00321705	0.0391033	down	cd20304, cupin_OxDC_N, Oxalate decarboxylase (OxDC), N-terminal cupin domain. This model represents the N-terminal cupin domain of oxalate decarboxylase (OxDC; EC 4.1.1.2), a manganese-dependent bicupin that catalyzes the conversion of oxalate to formate and carbon dioxide, utilizing dioxygen as a cofactor. It is evolutionarily related to oxalate oxidase (OxOx or germin; EC 1.2.3.4) which, in con…	pfam00190, Cupin_1, Cupin. This family represents the conserved barrel domain of the 'cupin' superfamily ('cupa' is the Latin term for a small barrel). This family contains 11S and 7S plant seed storage proteins, and germins. Plant seed storage proteins provide the major nitrogen source for the developing plant. 5.38e-15	-	-	sp|O34714|OXDC_BACSU Oxalate decarboxylase OxdC OS=Bacillus subtilis (strain 168) GN=oxdC PE=1 SV=1 2.31e-136	-	CAD7651867.1 unnamed protein product [Oppiella nova] >CAG2169051.1 unnamed protein product [Oppiella nova] 4.23e-96	-
TRINITY_DN13759_c0_g4	15.5641	37.5627	-1.27108	0.000377321	0.00818615	down	cd02933, OYE_like_FMN, Old yellow enzyme (OYE)-like FMN binding domain. OYE was the first flavin-dependent enzyme identified, however its true physiological role remains elusive to this day. Each monomer of OYE contains FMN as a non-covalently bound cofactor, uses NADPH as a reducing agent with oxygens, quinones, and alpha,beta-unsaturated aldehydes and ketones, and can act as electron acceptors …	pfam00724, Oxidored_FMN, NADH:flavin oxidoreductase / NADH oxidase family. 4.99e-66	-	KOG0134, KOG0134, KOG0134, NADH:flavin oxidoreductase/12-oxophytodienoate reductase [Energy production and conversion, General function prediction only]. 1.44e-48	sp|A0R665|ETHA_MYCS2 FAD-containing monooxygenase EthA OS=Mycobacterium smegmatis (strain ATCC 700084 / mc(2)155) GN=ethA PE=3 SV=1 4.25e-129	-	CAD7652970.1 unnamed protein product [Oppiella nova] >CAG2170157.1 unnamed protein product [Oppiella nova] 1.30e-116	-
TRINITY_DN13760_c1_g3	4.14077	11.7075	-1.49946	7.87214e-05	0.00242624	down	cd02440, AdoMet_MTases, S-adenosylmethionine-dependent methyltransferases (SAM or AdoMet-MTase), class I; AdoMet-MTases are enzymes that use S-adenosyl-L-methionine (SAM or AdoMet) as a substrate for methyltransfer, creating the product S-adenosyl-L-homocysteine (AdoHcy). There are at least five structurally distinct families of AdoMet-MTases, class I being the largest and most diverse. Within th…	pfam13847, Methyltransf_31, Methyltransferase domain. This family appears to have methyltransferase activity. 1.99e-18	-	KOG1269, KOG1269, KOG1269, SAM-dependent methyltransferases [Lipid transport and metabolism, General function prediction only]. 4.07e-13	sp|L7IP31|ERG6_MAGOY Sterol 24-C-methyltransferase OS=Magnaporthe oryzae (strain Y34) GN=ERG6 PE=2 SV=1 5.21e-27	-	CAF1069307.1 unnamed protein product [Rotaria sordida] >CAF3810455.1 unnamed protein product [Rotaria sordida] 6.54e-24	-
TRINITY_DN13763_c1_g1	25.4504	0.33636	6.24154	0.0002881	0.00676765	up	-	-	-	-	-	-	-	Homo sapiens isolate NA24385 chromosome Y 1.87e-38
TRINITY_DN13768_c0_g2	1.66255	13.7551	-3.04849	3.89771e-10	8.7855e-08	down	cd08249, enoyl_reductase_like, enoyl_reductase_like. Member identified as possible enoyl reductase of the MDR family. 2-enoyl thioester reductase (ETR) catalyzes the NADPH-dependent dependent conversion of trans-2-enoyl acyl carrier protein/coenzyme A (ACP/CoA) to acyl-(ACP/CoA) in fatty acid synthesis. 2-enoyl thioester reductase activity has been linked in Candida tropicalis as essential in mai…	-	-	KOG1198, KOG1198, KOG1198, Zinc-binding oxidoreductase [Energy production and conversion, General function prediction only]. 1.14e-20	sp|P54006|TOXD_COCCA Protein TOXD OS=Cochliobolus carbonum GN=TOXD PE=3 SV=1 1.56e-122	-	KAJ3026675.1 hypothetical protein HDU68_005261 [Siphonaria sp. JEL0065] 7.19e-111	-
TRINITY_DN13768_c2_g3	10.5823	2.92725	1.85404	0.00371246	0.0428813	up	-	-	-	-	sp|D4AS41|A7056_ARTBC Uncharacterized FAD-linked oxidoreductase ARB_02478 OS=Arthroderma benhamiae (strain ATCC MYA-4681 / CBS 112371) GN=ARB_07056 PE=1 SV=2 1.18e-78	-	CAF1052714.1 unnamed protein product [Didymodactylos carnosus] >CAF1204979.1 unnamed protein product [Didymodactylos carnosus] >CAF3819371.1 unnamed protein product [Didymodactylos carnosus] >CAF3969335.1 unnamed protein product [Didymodactylos carnosus] 1.04e-84	-
TRINITY_DN13768_c2_g6	0.608194	11.0426	-4.1824	0.000114358	0.00325285	down	-	-	-	-	-	-	-	-
TRINITY_DN13768_c3_g1	2.08131	68.3707	-5.03781	5.45996e-16	4.56598e-13	down	-	-	K00472-ko00330 Arginine and proline metabolism	KOG1591, KOG1591, KOG1591, Prolyl 4-hydroxylase alpha subunit [Amino acid transport and metabolism]. 2.41e-10	sp|F4J0A8|P4H6_ARATH Probable prolyl 4-hydroxylase 6 OS=Arabidopsis thaliana GN=P4H6 PE=2 SV=1 7.63e-12	-	CAF1160268.1 unnamed protein product [Adineta ricciae] 1.84e-24	-
TRINITY_DN13772_c0_g1	10.8013	23.3356	-1.11132	0.00131519	0.0210786	down	cd04056, Peptidases_S53, Peptidase domain in the S53 family. Members of the peptidases S53 (sedolisin) family include endopeptidases and exopeptidases sedolisin, kumamolysin, and (PSCP) Pepstatin-insensitive Carboxyl Proteinase. The S53 family contains a catalytic triad Glu/Asp/Ser with an additional acidic residue Asp in the oxyanion hole, similar to that of Asn in subtilisin. The stability of t…	pfam09286, Pro-kuma_activ, Pro-kumamolisin, activation domain. Members of this family are found in various subtilase propeptides, and adopt a ferredoxin-like fold, with an alpha+beta sandwich. Cleavage of the domain results in activation of the peptide. 1.18e-17	-	KOG1238, KOG1238, KOG1238, Glucose dehydrogenase/choline dehydrogenase/mandelonitrile lyase (GMC oxidoreductase family) [General function prediction only]. 6.28e-59	sp|Q70GH4|SED3_ASPFU Tripeptidyl-peptidase sed3 OS=Neosartorya fumigata (strain ATCC MYA-4609 / Af293 / CBS 101355 / FGSC A1100) GN=sed3 PE=1 SV=1 4.14e-103	-	OQV26199.1 Tripeptidyl-peptidase sed3 [Hypsibius exemplaris] 7.26e-83	-
TRINITY_DN13778_c0_g3	19.2334	40.8701	-1.08744	0.00168078	0.0254326	down	cd07103, ALDH_F5_SSADH_GabD, Mitochondrial succinate-semialdehyde dehydrogenase and ALDH family members 5A1 and 5F1-like. Succinate-semialdehyde dehydrogenase, mitochondrial (SSADH, GabD, EC=1.2.1.24) catalyzes the NAD+-dependent oxidation of succinate semialdehyde (SSA) to succinate. This group includes the human aldehyde dehydrogenase family 5 member A1 (ALDH5A1) which is a mitochondrial homote…	pfam00171, Aldedh, Aldehyde dehydrogenase family. This family of dehydrogenases act on aldehyde substrates. Members use NADP as a cofactor. The family includes the following members: The prototypical members are the aldehyde dehydrogenases EC:1.2.1.3. Succinate-semialdehyde dehydrogenase EC:1.2.1.16. Lactaldehyde dehydrogenase EC:1.2.1.22. Benzaldehyde dehydrogenase EC:1.2.1.28. Methylmalonate-se…	K00135-ko00760 Nicotinate and nicotinamide metabolism;ko00250 Alanine, aspartate and glutamate metabolism;ko00310 Lysine degradation;ko00650 Butanoate metabolism;ko00350 Tyrosine metabolism	KOG2451, KOG2451, KOG2451, Aldehyde dehydrogenase [Energy production and conversion]. 2.47e-176	sp|Q88RC0|DAVD_PSEPK Glutarate-semialdehyde dehydrogenase DavD OS=Pseudomonas putida (strain KT2440) GN=davD PE=3 SV=1 1.00e-172	GO:0000166, nucleotide binding;GO:0001505, regulation of neurotransmitter levels;GO:0003674, molecular_function;GO:0003824, catalytic activity;GO:0004777, succinate-semialdehyde dehydrogenase (NAD+) activity;GO:0005488, binding;GO:0005575, cellular_component;GO:0005622, intracellular;GO:0005623, cell;GO:0005737, cytoplasm;GO:0005739, mitochondrion;GO:0006082, organic acid metabolic process;GO:000…	KAI0212420.1 Succinate-semialdehyde dehydrogenase, mitochondrial [Lamellibrachia satsuma] 2.81e-191	-
TRINITY_DN13781_c0_g1	4.60756	11.7072	-1.34533	0.000527239	0.0106501	down	cd05911, Firefly_Luc_like, Firefly luciferase of light emitting insects and 4-Coumarate-CoA Ligase (4CL). This family contains insect firefly luciferases that share significant sequence similarity to plant 4-coumarate:coenzyme A ligases, despite their functional diversity. Luciferase catalyzes the production of light in the presence of MgATP, molecular oxygen, and luciferin. In the first step, lu…	pfam00501, AMP-binding, AMP-binding enzyme. 3.98e-31	-	KOG1176, KOG1176, KOG1176, Acyl-CoA synthetase [Lipid transport and metabolism]. 2.82e-73	sp|H3JQW0|OTEMO_PSEPU 2-oxo-Delta(3)-4,5,5-trimethylcyclopentenylacetyl-CoA monooxygenase OS=Pseudomonas putida GN=otemo PE=1 SV=1 1.49e-110	-	MCL4124691.1 hypothetical protein [Idotea baltica] 2.86e-108	-
TRINITY_DN13781_c0_g3	2.15984	5.33731	-1.30519	0.000635758	0.0121755	down	cd05911, Firefly_Luc_like, Firefly luciferase of light emitting insects and 4-Coumarate-CoA Ligase (4CL). This family contains insect firefly luciferases that share significant sequence similarity to plant 4-coumarate:coenzyme A ligases, despite their functional diversity. Luciferase catalyzes the production of light in the presence of MgATP, molecular oxygen, and luciferin. In the first step, lu…	pfam00501, AMP-binding, AMP-binding enzyme. 5.79e-35	-	KOG1176, KOG1176, KOG1176, Acyl-CoA synthetase [Lipid transport and metabolism]. 1.32e-79	sp|Q9M0X9|4CLL7_ARATH 4-coumarate--CoA ligase-like 7 OS=Arabidopsis thaliana GN=4CLL7 PE=1 SV=1 4.30e-90	-	XP_031566165.1 probable 4-coumarate--CoA ligase 3 [Actinia tenebrosa] 1.65e-95	-
TRINITY_DN13782_c0_g2	5.97583	43.3696	-2.85947	5.37631e-06	0.000293219	down	-	-	-	-	-	-	-	-
TRINITY_DN13783_c9_g2	40.9466	2.4771	4.04702	0.00431374	0.047022	up	-	-	-	-	sp|Q8N2A0|CX062_HUMAN Putative uncharacterized protein encoded by LINC00269 OS=Homo sapiens GN=LINC00269 PE=5 SV=1 7.15e-25	-	XP_016791645.1 carcinoembryonic antigen-related cell adhesion molecule 19 isoform X6 [Pan troglodytes] 2.01e-38	Homo sapiens F-box protein 31 (FBXO31), RefSeqGene on chromosome 16 1.64e-53
TRINITY_DN13789_c0_g3	1.37061	4.49835	-1.71458	0.000497267	0.0101924	down	cd17323, MFS_Tpo1_MDR_like, Yeast Polyamine transporter 1 (Tpo1) and similar multidrug resistance (MDR) transporters of the Major Facilitator Superfamily. This family is composed of fungal multidrug resistance (MDR) transporters including several proteins from Saccharomyces cerevisiae such as polyamine transporters 1-4 (Tpo1-4), quinidine resistance proteins 1-3 (Qdr1-3), dityrosine transporter 1…	-	-	KOG0255, KOG0255, KOG0255, Synaptic vesicle transporter SVOP and related transporters (major facilitator superfamily) [General function prediction only]. 7.66e-11	sp|O59699|YN42_SCHPO Uncharacterized transporter C36.02c OS=Schizosaccharomyces pombe (strain 972 / ATCC 24843) GN=SPBC36.02c PE=3 SV=1 3.89e-59	-	CAF1049368.1 unnamed protein product [Adineta steineri] >CAF1141909.1 unnamed protein product [Adineta steineri] 4.09e-56	-
TRINITY_DN13793_c0_g1	129.911	288.671	-1.1519	0.000188821	0.00488365	down	cd02922, FCB2_FMN, Flavocytochrome b2 (FCB2) FMN-binding domain. FCB2 (AKA L-lactate:cytochrome c oxidoreductase) is a respiratory enzyme located in the intermembrane space of fungal mitochondria which catalyzes the oxidation of L-lactate to pyruvate. FCB2 also participates in a short electron-transport chain involving cytochrome c and cytochrome oxidase which ultimately directs the reducing equi…	pfam00888, Cullin, Cullin family. 1.50e-132	K03347-ko04110 Cell cycle;ko04710 Circadian rhythm;ko04114 Oocyte meiosis;ko04310 Wnt signaling pathway;ko04141 Protein processing in endoplasmic reticulum;ko04111 Cell cycle - yeast;ko04341 Hedgehog signaling pathway - Fly;ko04350 TGF-beta signaling pathway;ko04120 Ubiquitin mediated proteolysis;ko04340 Hedgehog signaling pathway	KOG2284, KOG2284, KOG2284, E3 ubiquitin ligase, Cullin 2 component [Posttranslational modification, protein turnover, chaperones]. 2.75e-98	sp|O60999|CUL1_DICDI Cullin-1 OS=Dictyostelium discoideum GN=culA PE=1 SV=1 0.0	GO:0000082, G1/S transition of mitotic cell cycle;GO:0000086, G2/M transition of mitotic cell cycle;GO:0000151, ubiquitin ligase complex;GO:0000152, nuclear ubiquitin ligase complex;GO:0000278, mitotic cell cycle;GO:0003674, molecular_function;GO:0003676, nucleic acid binding;GO:0003677, DNA binding;GO:0003688, DNA replication origin binding;GO:0003690, double-stranded DNA binding;GO:0005488, bin…	KAJ3011858.1 hypothetical protein HDU68_001486 [Siphonaria sp. JEL0065] 3.91e-246	PREDICTED: Orbicella faveolata cullin-1-like (LOC110054454), mRNA 6.49e-25
TRINITY_DN13798_c6_g2	9.79867	72.536	-2.88804	3.81307e-07	3.16162e-05	down	cd03428, Ap4A_hydrolase_human_like, Diadenosine tetraphosphate (Ap4A) hydrolase is a member of the Nudix hydrolase superfamily. Ap4A hydrolases are well represented in a variety of prokaryotic and eukaryotic organisms. Phylogenetic analysis reveals two distinct subgroups where plant enzymes fall into one subfamily and fungi/animals/archaea enzymes, represented by this subfamily, fall into another…	-	-	-	-	-	UJR12166.1 hypothetical protein I4U23_016343 [Adineta vaga] 4.86e-22	-
TRINITY_DN13807_c0_g2	534.827	1161.35	-1.11866	0.0031233	0.0383015	down	cd02947, TRX_family, TRX family; composed of two groups: Group I, which includes proteins that exclusively encode a TRX domain; and Group II, which are composed of fusion proteins of TRX and additional domains. Group I TRX is a small ancient protein that alter the redox state of target proteins via the reversible oxidation of an active site dithiol, present in a CXXC motif, partially exposed at t…	pfam00085, Thioredoxin, Thioredoxin. Thioredoxins are small enzymes that participate in redox reactions, via the reversible oxidation of an active centre disulfide bond. Some members with only the active site are not separated from the noise. 3.33e-09	-	KOG0907, KOG0907, KOG0907, Thioredoxin [Posttranslational modification, protein turnover, chaperones]. 1.82e-12	sp|P29429|THIO_EMENI Thioredoxin OS=Emericella nidulans (strain FGSC A4 / ATCC 38163 / CBS 112.46 / NRRL 194 / M139) GN=TRX1 PE=1 SV=2 6.53e-14	GO:0000011, vacuole inheritance;GO:0000096, sulfur amino acid metabolic process;GO:0000097, sulfur amino acid biosynthetic process;GO:0000103, sulfate assimilation;GO:0000302, response to reactive oxygen species;GO:0000322, storage vacuole;GO:0000323, lytic vacuole;GO:0000324, fungal-type vacuole;GO:0003674, molecular_function;GO:0003824, catalytic activity;GO:0004791, thioredoxin-disulfide reduc…	ELT90043.1 hypothetical protein CAPTEDRAFT_206416 [Capitella teleta] 3.56e-10	-
TRINITY_DN13808_c0_g3	1.58809	41.6625	-4.71339	6.99132e-14	4.87217e-11	down	cd05374, 17beta-HSD-like_SDR_c, 17beta hydroxysteroid dehydrogenase-like, classical (c) SDRs. 17beta-hydroxysteroid dehydrogenases are a group of isozymes that catalyze activation and inactivation of estrogen and androgens. SDRs are a functionally diverse family of oxidoreductases that have a single domain with a structurally conserved Rossmann fold (alpha/beta folding pattern with a central beta…	pfam00106, adh_short, short chain dehydrogenase. This family contains a wide variety of dehydrogenases. 1.29e-19	K10352-ko04530 Tight junction	KOG1209, KOG1209, KOG1209, 1-Acyl dihydroxyacetone phosphate reductase and related dehydrogenases [Secondary metabolites biosynthesis, transport and catabolism]. 2.53e-21	sp|Q09851|AYR1_SCHPO NADPH-dependent 1-acyldihydroxyacetone phosphate reductase OS=Schizosaccharomyces pombe (strain 972 / ATCC 24843) GN=ayr1 PE=3 SV=2 6.63e-28	-	XP_007450305.1 PREDICTED: NADPH-dependent 1-acyldihydroxyacetone phosphate reductase-like, partial [Lipotes vexillifer] 3.86e-22	-
TRINITY_DN13814_c2_g1	23.5575	0.839679	4.8102	0.000720601	0.0131959	up	-	-	-	-	-	-	GFT12568.1 hypothetical protein NPIL_447491, partial [Nephila pilipes] 6.07e-23	Homo sapiens DNA, sequence_id: unplaced_0223 1.39e-21
TRINITY_DN13822_c3_g2	9.83137	2.71066	1.85875	0.00226453	0.0308631	up	-	pfam15463, ECM11, Extracellular mutant protein 11. ECM11 is a family of largely fungal proteins. ECM11 interacts with Cdc6, an essential protein involved in the initiation of DNA replication, and is a nuclear protein involved in maintaining chromatin structure. It was previously identified as a protein involved in yeast cell wall biogenesis and organisation, but is also found to be required in me…	-	KOG2878, KOG2878, KOG2878, Predicted kinase [General function prediction only]. 6.64e-45	sp|Q9UUH3|MUG58_SCHPO Uncharacterized kinase mug58 OS=Schizosaccharomyces pombe (strain 972 / ATCC 24843) GN=mug58 PE=1 SV=1 2.93e-48	-	KAJ3016289.1 hypothetical protein HDU68_012284 [Siphonaria sp. JEL0065] 7.14e-44	-
TRINITY_DN13824_c0_g1	1050.04	149.654	2.81074	1.07249e-06	7.4741e-05	up	cd01408, SIRT1, SIRT1: Eukaryotic group (class1) which includes human sirtuins SIRT1-3 and yeast Hst1-4; and are members of the SIR2 family of proteins, silent information regulator 2 (Sir2) enzymes which catalyze NAD+-dependent protein/histone deacetylation. Sir2 proteins have been shown to regulate gene silencing, DNA repair, and life span. The most-studied function, gene silencing, involves th…	pfam02146, SIR2, Sir2 family. This region is characteristic of Silent information regulator 2 (Sir2) proteins, or sirtuins. These are protein deacetylases that depend on nicotine adenine dinucleotide (NAD). They are found in many subcellular locations, including the nucleus, cytoplasm and mitochondria. Eukaryotic forms play in important role in the regulation of transcriptional repression. Moreov…	-	KOG2682, KOG2682, KOG2682, NAD-dependent histone deacetylases and class I sirtuins (SIR2 family) [Chromatin structure and dynamics, Transcription]. 7.53e-86	sp|D4AUF1|WSCD1_ARTBC WSC domain-containing protein ARB_07867 OS=Arthroderma benhamiae (strain ATCC MYA-4681 / CBS 112371) GN=ARB_07867 PE=1 SV=1 6.81e-09	-	XP_026273232.1 NAD-dependent protein deacetylase sirtuin-2 [Frankliniella occidentalis] 5.91e-81	-
TRINITY_DN13825_c2_g1	5.09808	0.108817	5.54997	2.31706e-05	0.000916883	up	cd02186, alpha_tubulin, The alpha-tubulin family. The tubulin superfamily includes five distinct families, the alpha-, beta-, gamma-, delta-, and epsilon-tubulins and a sixth family (zeta-tubulin) which is present only in kinetoplastid protozoa. The alpha- and beta-tubulins are the major components of microtubules, while gamma-tubulin plays a major role in the nucleation of microtubule assembly. …	pfam03953, Tubulin_C, Tubulin C-terminal domain. This family includes the tubulin alpha, beta and gamma chains. Members of this family are involved in polymer formation. Tubulins are GTPases. FtsZ can polymerize into tubes, sheets, and rings in vitro and is ubiquitous in eubacteria and archaea. Tubulin is the major component of microtubules. (The FtsZ GTPases have been split into their won family…	K07374-ko04145 Phagosome;ko04210 Apoptosis;ko04540 Gap junction	KOG1376, KOG1376, KOG1376, Alpha tubulin [Cytoskeleton]. 0.0	sp|Q6P9V9|TBA1B_RAT Tubulin alpha-1B chain OS=Rattus norvegicus GN=Tuba1b PE=1 SV=1 0.0	GO:0000226, microtubule cytoskeleton organization;GO:0003674, molecular_function;GO:0003676, nucleic acid binding;GO:0003723, RNA binding;GO:0003725, double-stranded RNA binding;GO:0005198, structural molecule activity;GO:0005200, structural constituent of cytoskeleton;GO:0005488, binding;GO:0005515, protein binding;GO:0005575, cellular_component;GO:0005622, intracellular;GO:0005623, cell;GO:0005…	XP_036255611.1 tubulin alpha-1B chain-like [Molothrus ater] 0.0	Homo sapiens tubulin alpha 1b (TUBA1B), mRNA 0.0
TRINITY_DN13830_c0_g1	89.3235	446.462	-2.32143	1.85016e-05	0.000773615	down	-	pfam13805, Pil1, Eisosome component PIL1. In the budding yeast, S. cerevisiae, Pil1 and another cytoplasmic protein, Lsp1, together form large immobile assemblies at the plasma membrane that mark sites for endocytosis, called eisosomes. Endocytosis functions to recycle plasma membrane components, to regulate cell-surface expression of signalling receptors and to internalize nutrients in all eukar…	-	-	sp|P53252|PIL1_YEAST Sphingolipid long chain base-responsive protein PIL1 OS=Saccharomyces cerevisiae (strain ATCC 204508 / S288c) GN=PIL1 PE=1 SV=1 2.13e-112	GO:0001932, regulation of protein phosphorylation;GO:0001933, negative regulation of protein phosphorylation;GO:0003674, molecular_function;GO:0005488, binding;GO:0005575, cellular_component;GO:0005622, intracellular;GO:0005623, cell;GO:0005737, cytoplasm;GO:0005739, mitochondrion;GO:0005740, mitochondrial envelope;GO:0005741, mitochondrial outer membrane;GO:0005856, cytoskeleton;GO:0005886, plas…	-	-
TRINITY_DN13833_c0_g5	22.7126	5.4314	2.06409	0.00263572	0.0341202	up	cd07406, MPP_CG11883_N, Drosophila melanogaster CG11883 and related proteins, N-terminal metallophosphatase domain. CG11883 is an uncharacterized Drosophila melanogaster UshA-like protein with two domains, an N-terminal metallophosphatase domain and a C-terminal nucleotidase domain. The N-terminal metallophosphatase domain belongs to a large superfamily of distantly related metallophosphatases (M…	pfam02872, 5_nucleotid_C, 5'-nucleotidase, C-terminal domain. 1.35e-20	-	-	sp|O34313|NTPES_BACSU Trifunctional nucleotide phosphoesterase protein YfkN OS=Bacillus subtilis (strain 168) GN=yfkN PE=1 SV=1 3.91e-12	-	XP_050399252.1 mannosylglucosyl-3-phosphoglycerate phosphatase-like [Patella vulgata] 1.38e-99	-
TRINITY_DN13841_c1_g1	5.915	15.2484	-1.36621	0.000210323	0.00533245	down	-	-	-	-	-	-	-	-
TRINITY_DN13841_c1_g3	0.526427	12.0821	-4.52049	2.74812e-08	3.37965e-06	down	-	-	-	-	-	-	-	-
TRINITY_DN13845_c1_g2	9.99355	44.7491	-2.16279	0.000360826	0.00794564	down	cd00691, ascorbate_peroxidase, Ascorbate peroxidases and cytochrome C peroxidases. Ascorbate peroxidases are a subgroup of heme-dependent peroxidases of the plant superfamily that share a heme prosthetic group and catalyze a multistep oxidative reaction involving hydrogen peroxide as the electron acceptor. Along with related catalase-peroxidases, ascorbate peroxidases belong to class I of the pla…	pfam00141, peroxidase, Peroxidase. 4.21e-14	-	-	sp|Q5B1Z0|CCPR2_EMENI Putative heme-binding peroxidase OS=Emericella nidulans (strain FGSC A4 / ATCC 38163 / CBS 112.46 / NRRL 194 / M139) GN=AN5440 PE=3 SV=1 4.45e-146	GO:0000302, response to reactive oxygen species;GO:0003674, molecular_function;GO:0003824, catalytic activity;GO:0004130, cytochrome-c peroxidase activity;GO:0004601, peroxidase activity;GO:0006950, response to stress;GO:0006979, response to oxidative stress;GO:0008150, biological_process;GO:0008152, metabolic process;GO:0009056, catabolic process;GO:0009636, response to toxic substance;GO:000998…	KAJ3006561.1 L-ascorbate peroxidase 3 [Siphonaria sp. JEL0065] 1.33e-93	-
TRINITY_DN13848_c4_g4	0.893841	7.71253	-3.10911	0.000603496	0.0117733	down	-	-	-	-	-	-	-	-
TRINITY_DN13850_c0_g2	23.5609	122.15	-2.37418	1.81226e-05	0.000760301	down	cd17974, DEXHc_DHX16, DEXH-box helicase domain of DEAH-box helicase 16. DEAH-box helicase 16 (DHX16) is probably involved in pre-mRNA splicing. DHX16 belongs to the DEAD-like helicase superfamily, a diverse family of proteins involved in ATP-dependent RNA or DNA unwinding. This domain contains the ATP-binding region. 5.96e-87	pfam07717, OB_NTP_bind, Oligonucleotide/oligosaccharide-binding (OB)-fold. This family is found towards the C-terminus of the DEAD-box helicases (pfam00270). In these helicases it is apparently always found in association with pfam04408. There do seem to be a couple of instances where it occurs by itself. The structure Structure 3i4u adopts an OB-fold. helicases (pfam00270). In these helicases it…	K12813-ko03040 Spliceosome	KOG0923, KOG0923, KOG0923, mRNA splicing factor ATP-dependent RNA helicase [RNA processing and modification]. 0.0	sp|Q10752|CDC28_SCHPO Pre-mRNA-splicing factor ATP-dependent RNA helicase-like protein cdc28 OS=Schizosaccharomyces pombe (strain 972 / ATCC 24843) GN=cdc28 PE=3 SV=2 0.0	GO:0000349, generation of catalytic spliceosome for first transesterification step;GO:0000375, RNA splicing, via transesterification reactions;GO:0000377, RNA splicing, via transesterification reactions with bulged adenosine as nucleophile;GO:0000393, spliceosomal conformational changes to generate catalytic conformation;GO:0000398, mRNA splicing, via spliceosome;GO:0003674, molecular_function;GO…	KAJ3027179.1 hypothetical protein HDU68_004281 [Siphonaria sp. JEL0065] 0.0	-
TRINITY_DN13851_c4_g1	2.51198	7.43805	-1.5661	0.000897929	0.0155244	down	cd06184, flavohem_like_fad_nad_binding, FAD_NAD(P)H binding domain of flavohemoglobin. Flavohemoglobins have a globin domain containing a B-type heme fused with a ferredoxin reductase-like FAD/NAD-binding domain. Flavohemoglobins detoxify nitric oxide (NO) via an NO dioxygenase reaction. The hemoglobin domain adopts a globin fold with an embedded heme molecule. Flavohemoglobins also have a C-term…	-	-	KOG3378, KOG3378, KOG3378, Hemoglobin-like flavoprotein [Energy production and conversion]. 4.22e-09	sp|Q9RYR5|HMP_DEIRA Flavohemoprotein OS=Deinococcus radiodurans (strain ATCC 13939 / DSM 20539 / JCM 16871 / LMG 4051 / NBRC 15346 / NCIMB 9279 / R1 / VKM B-1422) GN=hmp PE=3 SV=1 6.58e-28	-	XP_040091876.1 flavohemoprotein-like, partial [Oryx dammah] 6.94e-27	-
TRINITY_DN13853_c0_g1	2.57324	20.9309	-3.02397	3.20253e-05	0.00118503	down	-	-	-	-	-	-	-	-
TRINITY_DN13853_c0_g2	0.401015	3.54482	-3.14398	0.00350849	0.0417063	down	-	-	-	-	-	-	-	-
TRINITY_DN13873_c1_g1	2299.2	9283.19	-2.01349	0.000106606	0.00309643	down	-	pfam15140, DUF4573, Domain of unknown function (DUF4573). This family of proteins is found in eukaryotes. Proteins in this family are typically approximately 360 amino acids in length. 1.47e-06	-	-	sp|Q25060|LWA_HYDEC LWamide neuropeptides OS=Hydractinia echinata PE=2 SV=1 5.80e-16	-	-	-
TRINITY_DN13881_c1_g1	1382.91	276.362	2.32307	0.000105977	0.00309158	up	cd13880, CuRO_2_MaLCC_like, The second cupredoxin domain of the fungal laccases similar to Ma-LCC from Melanocarpus albomyces. The subfamily of fungal laccases includes Ma-LCC and similar proteins. Ma-LCC is a multicopper oxidase (MCO) from Melanocarpus albomyces. Its crystal structure contains all four coppers at the mono- and trinuclear copper centers. Laccase is a blue multi-copper enzyme that…	pfam00394, Cu-oxidase, Multicopper oxidase. Many of the proteins in this family contain multiple similar copies of this plastocyanin-like domain. 7.31e-26	-	KOG1263, KOG1263, KOG1263, Multicopper oxidases [Secondary metabolites biosynthesis, transport and catabolism]. 5.05e-13	sp|Q03966|LAC1_CRYPA Laccase OS=Cryphonectria parasitica GN=LAC-1 PE=3 SV=1 1.63e-81	-	CAF0822288.1 unnamed protein product [Adineta steineri] >CAF0875077.1 unnamed protein product [Adineta steineri] >CAF3688132.1 unnamed protein product [Adineta steineri] >CAF3756449.1 unnamed protein product [Adineta steineri] 9.90e-19	-
TRINITY_DN13887_c1_g1	8.43246	17.3162	-1.0381	0.00423605	0.0464891	down	-	-	-	-	-	-	-	-
TRINITY_DN13891_c0_g2	19.2744	3.50719	2.45829	2.77176e-05	0.00105681	up	cd18580, ABC_6TM_ABCC_D2, Six-transmembrane helical domain 2 (TMD2) of the ABC transporters, subfamily C. This group represents the six-transmembrane domain 2 (TMD2) of the ABC transporters that belong to the ABCC subfamily, such as the sulphonylurea receptors SUR1/2 (ABCC8), the cystic fibrosis transmembrane conductance regulator (CFTR, ABCC7), Multidrug-Resistance associated Proteins (MRP1-9), …	pfam00664, ABC_membrane, ABC transporter transmembrane region. This family represents a unit of six transmembrane helices. Many members of the ABC transporter family (pfam00005) have two such regions. 9.91e-07	-	KOG0054, KOG0054, KOG0054, Multidrug resistance-associated protein/mitoxantrone resistance protein, ABC superfamily [Secondary metabolites biosynthesis, transport and catabolism]. 2.09e-23	sp|Q54VJ0|ABCC2_DICDI ABC transporter C family member 2 OS=Dictyostelium discoideum GN=abcC2 PE=3 SV=1 6.76e-54	-	KAI1883878.1 hypothetical protein AGOR_G00220620 [Albula goreensis] 7.64e-51	-
TRINITY_DN13891_c0_g3	8.74657	1.57879	2.4699	0.000529314	0.0106577	up	cd18579, ABC_6TM_ABCC_D1, Six-transmembrane helical domain 1 (TMD1) of the ABC transporters, subfamily C. This group represents the six-transmembrane domain 1 (TMD1)of the ABC transporters that belong to the ABCC subfamily, such as the sulphonylurea receptors SUR1/2 (ABCC8), the cystic fibrosis transmembrane conductance regulator (CFTR, ABCC7), Multidrug-Resistance associated Proteins (MRP1-9), V…	-	-	KOG0054, KOG0054, KOG0054, Multidrug resistance-associated protein/mitoxantrone resistance protein, ABC superfamily [Secondary metabolites biosynthesis, transport and catabolism]. 2.55e-15	sp|Q54P13|ABCC8_DICDI ABC transporter C family member 8 OS=Dictyostelium discoideum GN=abcC8 PE=3 SV=1 8.70e-20	-	XP_040856626.1 ATP-binding cassette sub-family C member 3 isoform X4 [Ochotona curzoniae] 3.90e-18	-
TRINITY_DN13892_c1_g1	41.2411	13.1463	1.64943	0.0046584	0.0492291	up	-	-	-	-	-	-	-	-
TRINITY_DN13894_c2_g1	15.1866	45.7544	-1.59111	0.00100356	0.016943	down	cd02188, gamma_tubulin, The gamma-tubulin family. Gamma-tubulin is a ubiquitous phylogenetically conserved member of tubulin superfamily. Gamma is a low abundance protein present within the cells in both various types of microtubule-organizing centers and cytoplasmic protein complexes. Gamma-tubulin recruits the alpha/beta-tubulin dimers that form the minus ends of microtubules and is thought to …	pfam03953, Tubulin_C, Tubulin C-terminal domain. This family includes the tubulin alpha, beta and gamma chains. Members of this family are involved in polymer formation. Tubulins are GTPases. FtsZ can polymerize into tubes, sheets, and rings in vitro and is ubiquitous in eubacteria and archaea. Tubulin is the major component of microtubules. (The FtsZ GTPases have been split into their won family…	-	KOG1374, KOG1374, KOG1374, Gamma tubulin [Cytoskeleton]. 0.0	sp|P53377|TBG_NEUCR Tubulin gamma chain OS=Neurospora crassa (strain ATCC 24698 / 74-OR23-1A / CBS 708.71 / DSM 1257 / FGSC 987) GN=tbg PE=2 SV=1 0.0	GO:0000022, mitotic spindle elongation;GO:0000070, mitotic sister chromatid segregation;GO:0000075, cell cycle checkpoint;GO:0000226, microtubule cytoskeleton organization;GO:0000278, mitotic cell cycle;GO:0000280, nuclear division;GO:0000281, mitotic cytokinesis;GO:0000819, sister chromatid segregation;GO:0000910, cytokinesis;GO:0000923, equatorial microtubule organizing center;GO:0000928, gamma…	KAJ3031595.1 gamma-tubulin [Siphonaria sp. JEL0065] 8.63e-218	-
TRINITY_DN13902_c2_g3	3.62417	22.4087	-2.62834	1.42419e-05	0.000622475	down	-	-	-	-	-	-	-	-
TRINITY_DN13907_c2_g15	1.96179	7.19317	-1.87446	0.000178448	0.00469278	down	-	-	-	-	-	-	-	-
TRINITY_DN13908_c0_g2	0.222161	3.28462	-3.88605	0.000471654	0.00981782	down	-	-	-	-	-	-	-	-
TRINITY_DN13912_c0_g1	167.649	401.025	-1.25825	0.00148271	0.0231621	down	cd09597, M4_TLP, Peptidase M4 family including thermolysin, protealysin, aureolysin, and neutral protease. This peptidase M4 family includes several endopeptidases such as thermolysin (EC 3.4.24.27), aureolysin (the extracellular metalloproteinase from Staphylococcus aureus), neutral protease from Bacillus cereus, protealysin, and bacillolysin (EC 3.4.24.28). Typically, the M4 peptidases consist …	pfam03367, zf-ZPR1, ZPR1 zinc-finger domain. The zinc-finger protein ZPR1 is ubiquitous among eukaryotes. It is indeed known to be an essential protein in yeast. In quiescent cells, ZPR1 is localized to the cytoplasm. But in proliferating cells treated with EGF or with other mitogens, ZPR1 accumulates in the nucleolus. ZPR1 interacts with the cytoplasmic domain of the inactive EGF receptor (EGFR)…	-	KOG2703, KOG2703, KOG2703, C4-type Zn-finger protein [General function prediction only]. 1.18e-22	sp|O13724|ZPR1_SCHPO Zinc finger protein zpr1 OS=Schizosaccharomyces pombe (strain 972 / ATCC 24843) GN=zpr1 PE=3 SV=1 1.49e-126	GO:0000086, G2/M transition of mitotic cell cycle;GO:0000278, mitotic cell cycle;GO:0002181, cytoplasmic translation;GO:0003674, molecular_function;GO:0005488, binding;GO:0005515, protein binding;GO:0005575, cellular_component;GO:0005622, intracellular;GO:0005623, cell;GO:0005634, nucleus;GO:0005737, cytoplasm;GO:0006412, translation;GO:0006518, peptide metabolic process;GO:0006807, nitrogen comp…	KAI4465916.1 zinc finger protein zpr1 [Holotrichia oblita] 1.30e-105	-
TRINITY_DN13919_c0_g2	1.15995	6.70051	-2.5302	5.84384e-06	0.000311937	down	-	-	-	-	sp|Q9ST27|PHOT2_ORYSJ Phototropin-2 OS=Oryza sativa subsp. japonica GN=PHOT2 PE=1 SV=1 1.09e-21	-	5HZJ_A Crystal structure of photoinhibitable Intersectin1 containing wildtype LOV2 domain [Homo sapiens] >5HZJ_B Crystal structure of photoinhibitable Intersectin1 containing wildtype LOV2 domain [Homo sapiens] >5HZK_B Crystal structure of photoinhibitable Intersectin1 containing wildtype LOV2 domain in complex with Cdc42 [Homo sapiens] >5HZK_D Crystal structure of photoinhibitable Intersectin1 c…	-
TRINITY_DN13919_c0_g3	3.53224	15.7804	-2.15948	0.000401705	0.00861365	down	-	-	-	-	-	-	-	-
TRINITY_DN13923_c3_g3	0.769073	44.4759	-5.85376	1.6325e-21	5.11953e-18	down	-	-	-	-	-	-	CAF1183702.1 unnamed protein product [Adineta steineri] >CAF1421524.1 unnamed protein product [Adineta steineri] >CAF1466979.1 unnamed protein product [Adineta steineri] >CAF1634700.1 unnamed protein product [Adineta steineri] 3.28e-18	-
TRINITY_DN13932_c7_g6	1.11482	6.87748	-2.62507	1.51117e-06	9.87301e-05	down	-	-	-	-	-	-	-	-
TRINITY_DN13933_c1_g2	3.14836	0.266132	3.56438	0.000301864	0.0070122	up	-	-	-	KOG2132, KOG2132, KOG2132, Uncharacterized conserved protein, contains JmjC domain [Chromatin structure and dynamics, Signal transduction mechanisms]. 4.90e-11	sp|Q00808|HETE1_PODAS Vegetative incompatibility protein HET-E-1 OS=Podospora anserina GN=HET-E1 PE=3 SV=1 4.44e-50	-	OUC39983.1 putative JmjC domain protein [Trichinella nativa] 4.68e-13	-
TRINITY_DN13934_c1_g1	0.281054	1.56382	-2.47616	0.0040404	0.0450915	down	-	-	-	-	-	-	-	-
TRINITY_DN13934_c5_g5	4.58073	17.8043	-1.95858	0.00023488	0.00577842	down	-	-	-	-	-	-	-	-
TRINITY_DN13934_c5_g6	2.78469	10.4258	-1.90457	0.00028173	0.00664291	down	-	-	-	-	-	-	-	-
TRINITY_DN13938_c3_g3	0.478363	2.48387	-2.37641	0.000480427	0.0099283	down	cd17502, MFS_Azr1_MDR_like, Saccharomyces cerevisiae Azole resistance protein 1 (Azr1p), and similar multidrug resistance (MDR) transporters of the Major Facilitator Superfamily. This subfamily is composed of multidrug resistance (MDR) transporters including various Saccharomyces cerevisiae proteins such as azole resistance protein 1 (Azr1p), vacuolar basic amino acid transporter 1 (Vba1p), vacuo…	pfam06609, TRI12, Fungal trichothecene efflux pump (TRI12). This family consists of several fungal specific trichothecene efflux pump proteins. Many of the genes involved in trichothecene toxin biosynthesis in Fusarium sporotrichioides are present within a gene cluster.It has been suggested that TRI12 may play a role in F. sporotrichioides self-protection against trichothecenes. 4.41e-10	-	-	sp|B6HJU0|ROQT_PENRW Efflux pump roqT OS=Penicillium rubens (strain ATCC 28089 / DSM 1075 / NRRL 1951 / Wisconsin 54-1255) GN=roqT PE=1 SV=1 1.55e-121	-	KAJ3010587.1 hypothetical protein HDU68_002075 [Siphonaria sp. JEL0065] 6.70e-93	-
TRINITY_DN13943_c0_g1	32.4055	132.206	-2.02848	0.000717645	0.013161	down	-	-	-	-	-	-	-	-
TRINITY_DN13944_c0_g1	22.5329	92.7081	-2.04066	0.00100719	0.0169814	down	-	-	-	-	-	-	-	-
TRINITY_DN13946_c0_g6	5.14468	0.754478	2.76953	0.00035116	0.00784528	up	-	-	-	-	-	-	-	-
TRINITY_DN13947_c0_g1	19.5155	0.57408	5.08722	0.000545066	0.0108906	up	cd01883, EF1_alpha, Elongation Factor 1-alpha (EF1-alpha) protein family. EF1 is responsible for the GTP-dependent binding of aminoacyl-tRNAs to the ribosomes. EF1 is composed of four subunits: the alpha chain which binds GTP and aminoacyl-tRNAs, the gamma chain that probably plays a role in anchoring the complex to other cellular components and the beta and delta (or beta') chains. This subfamil…	pfam00009, GTP_EFTU, Elongation factor Tu GTP binding domain. This domain contains a P-loop motif, also found in several other families such as pfam00071, pfam00025 and pfam00063. Elongation factor Tu consists of three structural domains, this plus two C-terminal beta barrel domains. 9.35e-32	K03231-ko03013 RNA transport	KOG0052, KOG0052, KOG0052, Translation elongation factor EF-1 alpha/Tu [Translation, ribosomal structure and biogenesis]. 6.39e-107	sp|P68105|EF1A1_RABIT Elongation factor 1-alpha 1 OS=Oryctolagus cuniculus GN=EEF1A1 PE=1 SV=1 0.0	GO:0003674, molecular_function;GO:0003676, nucleic acid binding;GO:0003723, RNA binding;GO:0003746, translation elongation factor activity;GO:0003824, catalytic activity;GO:0003924, GTPase activity;GO:0005488, binding;GO:0005575, cellular_component;GO:0005622, intracellular;GO:0005623, cell;GO:0005634, nucleus;GO:0005730, nucleolus;GO:0005737, cytoplasm;GO:0005853, eukaryotic translation elongati…	XP_052511190.1 elongation factor 1-alpha 1-like [Budorcas taxicolor] 0.0	Homo sapiens eukaryotic translation elongation factor 1 alpha 1 (EEF1A1), mRNA 0.0
TRINITY_DN13948_c0_g2	85.834	16.0441	2.41951	0.00136552	0.021655	up	-	-	-	-	-	-	-	-
TRINITY_DN13950_c10_g1	33.7967	2.50212	3.75566	0.00467827	0.0493559	up	-	-	-	-	sp|Q05481|ZNF91_HUMAN Zinc finger protein 91 OS=Homo sapiens GN=ZNF91 PE=2 SV=2 1.03e-13	GO:0003674, molecular_function;GO:0005488, binding;GO:0005515, protein binding;GO:0005575, cellular_component;GO:0005622, intracellular;GO:0005623, cell;GO:0005634, nucleus;GO:0005737, cytoplasm;GO:0005829, cytosol;GO:0005856, cytoskeleton;GO:0005911, cell-cell junction;GO:0006355, regulation of transcription, DNA-templated;GO:0006357, regulation of transcription by RNA polymerase II;GO:0006810, …	BAE91091.1 unnamed protein product [Macaca fascicularis] 7.49e-22	Homo sapiens chromosome 18 clone CH17-59I22, complete sequence 1.02e-19
TRINITY_DN13950_c9_g3	25.3911	0.92338	4.78126	0.00473232	0.0496768	up	-	-	-	-	sp|Q86U02|CN165_HUMAN Putative uncharacterized protein encoded by LINC00596 OS=Homo sapiens GN=LINC00596 PE=5 SV=1 1.41e-17	-	EHH64647.1 hypothetical protein EGM_17921, partial [Macaca fascicularis] 3.14e-21	Homo sapiens BAC clone RP11-513O19 from 2, complete sequence 2.87e-19
TRINITY_DN13955_c1_g3	40.6882	12.1338	1.74558	0.00157528	0.0242756	up	-	-	-	-	sp|Q1MTM9|YFN1_SCHPO Uncharacterized transcriptional regulatory protein C1327.01c OS=Schizosaccharomyces pombe (strain 972 / ATCC 24843) GN=SPAC1327.01c PE=1 SV=2 6.33e-11	-	-	-
TRINITY_DN13967_c0_g7	2.18421	8.06344	-1.88428	0.000405974	0.00868206	down	cd00312, Esterase_lipase, Esterases and lipases (includes fungal lipases, cholinesterases, etc.) These enzymes act on carboxylic esters (EC: 3.1.1.-). The catalytic apparatus involves three residues (catalytic triad): a serine, a glutamate or aspartate and a histidine.These catalytic residues are responsible for the nucleophilic attack on the carbonyl carbon atom of the ester bond. In contrast wi…	pfam00135, COesterase, Carboxylesterase family. 3.88e-30	-	KOG4389, KOG4389, KOG4389, Acetylcholinesterase/Butyrylcholinesterase [Signal transduction mechanisms]. 1.62e-42	sp|P21927|CHLE_RABIT Cholinesterase OS=Oryctolagus cuniculus GN=BCHE PE=2 SV=1 3.21e-44	-	XP_029699816.1 cholinesterase-like [Takifugu rubripes] >XP_029699817.1 cholinesterase-like [Takifugu rubripes] 6.23e-54	-
TRINITY_DN13970_c1_g2	19.4124	71.2998	-1.87692	7.35661e-06	0.000372102	down	cd01926, cyclophilin_ABH_like, cyclophilin_ABH_like: Cyclophilin A, B and H-like cyclophilin-type peptidylprolyl cis- trans isomerase (PPIase) domain. This family represents the archetypal cystolic cyclophilin similar to human cyclophilins A, B and H. PPIase is an enzyme which accelerates protein folding by catalyzing the cis-trans isomerization of the peptide bonds preceding proline residues. Th…	pfam00160, Pro_isomerase, Cyclophilin type peptidyl-prolyl cis-trans isomerase/CLD. The peptidyl-prolyl cis-trans isomerases, also known as cyclophilins, share this domain of about 109 amino acids. Cyclophilins have been found in all organisms studied so far and catalyze peptidyl-prolyl isomerisation during which the peptide bond preceding proline (the peptidyl-prolyl bond) is stabilized in the c…	K18339-ko00051 Fructose and mannose metabolism	KOG0546, KOG0546, KOG0546, HSP90 co-chaperone CPR7/Cyclophilin [Posttranslational modification, protein turnover, chaperones]. 3.68e-49	sp|P14088|PPIA_ECHGR Peptidyl-prolyl cis-trans isomerase OS=Echinococcus granulosus GN=CYP-1 PE=2 SV=2 1.93e-56	-	VDK40807.1 unnamed protein product [Taenia asiatica] 5.02e-63	PREDICTED: Amphiprion ocellaris peptidyl-prolyl cis-trans isomerase (LOC111571239), mRNA 2.92e-31
TRINITY_DN13972_c0_g1	37.0495	88.5746	-1.25744	0.000139809	0.00384371	down	cd00354, FBPase, Fructose-1,6-bisphosphatase, an enzyme that catalyzes the hydrolysis of fructose-1,6-biphosphate into fructose-6-phosphate and is critical in gluconeogenesis pathway. The alignment model also includes chloroplastic FBPases and sedoheptulose-1,7-biphosphatases that play a role in pentose phosphate pathway (Calvin cycle). 1.59e-94	pfam00316, FBPase, Fructose-1-6-bisphosphatase, N-terminal domain. This family represents the N-terminus of this protein family. 4.66e-53	K03841-ko00710 Carbon fixation in photosynthetic organisms;ko04152 AMPK signaling pathway;ko00680 Methane metabolism;ko00051 Fructose and mannose metabolism;ko01200 Carbon metabolism;ko00010 Glycolysis / Gluconeogenesis;ko04910 Insulin signaling pathway;ko00030 Pentose phosphate pathway	KOG1458, KOG1458, KOG1458, Fructose-1,6-bisphosphatase [Carbohydrate transport and metabolism]. 5.22e-111	sp|P09201|F16P_YEAST Fructose-1,6-bisphosphatase OS=Saccharomyces cerevisiae (strain ATCC 204508 / S288c) GN=FBP1 PE=1 SV=2 1.09e-123	GO:0000166, nucleotide binding;GO:0001558, regulation of cell growth;GO:0003674, molecular_function;GO:0003824, catalytic activity;GO:0005488, binding;GO:0005575, cellular_component;GO:0005622, intracellular;GO:0005623, cell;GO:0005737, cytoplasm;GO:0005829, cytosol;GO:0005975, carbohydrate metabolic process;GO:0005984, disaccharide metabolic process;GO:0005985, sucrose metabolic process;GO:00059…	XP_046401197.1 fructose-1,6-bisphosphatase 1 isoform X2 [Ischnura elegans] 5.42e-99	-
TRINITY_DN13972_c0_g2	4.8526	235.871	-5.60309	1.05746e-05	0.000496806	down	-	-	-	-	-	-	-	-
TRINITY_DN13980_c0_g1	5.77892	73.4383	-3.66766	3.89351e-14	2.87295e-11	down	cd03139, GATase1_PfpI_2, Type 1 glutamine amidotransferase (GATase1)-like domain found in a subgroup of proteins similar to PfpI from Pyrococcus furiosus. Type 1 glutamine amidotransferase (GATase1)-like domain found in a subgroup of proteins similar to PfpI from Pyrococcus furiosus. PfpI is an ATP-independent intracellular proteases which may hydrolyze small peptides to provide a nutritional sou…	pfam01965, DJ-1_PfpI, DJ-1/PfpI family. The family includes the protease PfpI. This domain is also found in transcriptional regulators. 5.26e-07	-	KOG2764, KOG2764, KOG2764, Putative transcriptional regulator DJ-1 [General function prediction only, Defense mechanisms]. 8.78e-08	sp|Q8G9F9|INHA_PSEPU Isonitrile hydratase OS=Pseudomonas putida GN=inhA PE=1 SV=1 9.47e-24	-	CAF1215146.1 unnamed protein product [Adineta steineri] >CAF3565104.1 unnamed protein product [Adineta steineri] 1.37e-51	-
TRINITY_DN13980_c1_g1	331.839	28.6945	3.53163	7.82235e-06	0.00039407	up	-	pfam00264, Tyrosinase, Common central domain of tyrosinase. This family also contains polyphenol oxidases and some hemocyanins. Binds two copper ions via two sets of three histidines. This family is related to pfam00372. 3.07e-11	K00505-ko00350 Tyrosine metabolism;ko00740 Riboflavin metabolism;ko00950 Isoquinoline alkaloid biosynthesis;ko00965 Betalain biosynthesis;ko04916 Melanogenesis	-	sp|P07524|TYRO_STRAT Tyrosinase OS=Streptomyces antibioticus GN=melC2 PE=3 SV=2 4.08e-07	-	KAI1888175.1 hypothetical protein AGOR_G00182320 [Albula goreensis] 2.95e-08	-
TRINITY_DN13983_c1_g1	37.3943	263.724	-2.81814	3.30188e-10	7.81487e-08	down	cd05352, MDH-like_SDR_c, mannitol dehydrogenase (MDH)-like, classical (c) SDRs. NADP-mannitol dehydrogenase catalyzes the conversion of fructose to mannitol, an acyclic 6-carbon sugar. MDH is a tetrameric member of the SDR family. This subgroup also includes various other tetrameric SDRs, including Pichia stipitis D-arabinitol dehydrogenase (aka polyol dehydrogenase), Candida albicans Sou1p, a so…	pfam00106, adh_short, short chain dehydrogenase. This family contains a wide variety of dehydrogenases. 1.71e-07	-	KOG0725, KOG0725, KOG0725, Reductases with broad range of substrate specificities [General function prediction only]. 1.75e-18	sp|Q6CEE9|SDR_YARLI Probable NADP-dependent mannitol dehydrogenase OS=Yarrowia lipolytica (strain CLIB 122 / E 150) GN=YALI0B16192g PE=1 SV=1 2.87e-10	-	CAF0999939.1 unnamed protein product [Rotaria sordida] >CAF1013357.1 unnamed protein product [Rotaria sordida] >CAF3692633.1 unnamed protein product [Rotaria sordida] >CAF3787172.1 unnamed protein product [Rotaria sordida] 1.33e-41	-
TRINITY_DN13984_c0_g2	1142.84	2883.73	-1.33531	0.000214495	0.00541374	down	cd00044, CysPc, Calpains, domains IIa, IIb; calcium-dependent cytoplasmic cysteine proteinases, papain-like. Functions in cytoskeletal remodeling processes, cell differentiation, apoptosis and signal transduction. 1.86e-30	pfam00648, Peptidase_C2, Calpain family cysteine protease. 4.50e-38	-	KOG0045, KOG0045, KOG0045, Cytosolic Ca2+-dependent cysteine protease (calpain), large subunit (EF-Hand protein superfamily) [Posttranslational modification, protein turnover, chaperones, Signal transduction mechanisms]. 3.24e-31	sp|P27398|CAND_DROME Calpain-D OS=Drosophila melanogaster GN=sol PE=1 SV=2 1.98e-32	-	KAJ3009877.1 hypothetical protein HDU68_002451 [Siphonaria sp. JEL0065] 5.59e-77	-
TRINITY_DN13984_c0_g7	2.6409	33.8984	-3.68212	9.69475e-12	3.92293e-09	down	-	-	-	-	-	-	-	-
TRINITY_DN13986_c1_g1	9.84726	1.86832	2.39798	0.00192314	0.0279043	up	-	-	-	-	sp|O94336|YHM3_SCHPO Uncharacterized FCP1 homology domain-containing protein C1271.03c OS=Schizosaccharomyces pombe (strain 972 / ATCC 24843) GN=SPBC1271.03c PE=3 SV=1 1.14e-26	GO:0003674, molecular_function;GO:0003824, catalytic activity;GO:0004721, phosphoprotein phosphatase activity;GO:0005575, cellular_component;GO:0005623, cell;GO:0005886, plasma membrane;GO:0006464, cellular protein modification process;GO:0006470, protein dephosphorylation;GO:0006793, phosphorus metabolic process;GO:0006796, phosphate-containing compound metabolic process;GO:0006807, nitrogen com…	CAF0743332.1 unnamed protein product [Didymodactylos carnosus] >CAF0773283.1 unnamed protein product [Didymodactylos carnosus] >CAF3521075.1 unnamed protein product [Didymodactylos carnosus] >CAF3555615.1 unnamed protein product [Didymodactylos carnosus] 9.23e-10	-
TRINITY_DN13986_c5_g3	22.2299	1.39109	3.99822	1.52143e-06	9.88854e-05	up	cd00333, MIP, Major intrinsic protein (MIP) superfamily. Members of the MIP superfamily function as membrane channels that selectively transport water, small neutral molecules, and ions out of and between cells. The channel proteins share a common fold: the N-terminal cytosolic portion followed by six transmembrane helices, which might have arisen through gene duplication. On the basis of sequenc…	pfam00230, MIP, Major intrinsic protein. MIP (Major Intrinsic Protein) family proteins exhibit essentially two distinct types of channel properties: (1) specific water transport by the aquaporins, and (2) small neutral solutes transport, such as glycerol by the glycerol facilitators. 3.32e-17	-	KOG0224, KOG0224, KOG0224, Aquaporin (major intrinsic protein family) [Carbohydrate transport and metabolism]. 1.46e-42	sp|P43549|YFF4_YEAST Uncharacterized membrane protein YFL054C OS=Saccharomyces cerevisiae (strain ATCC 204508 / S288c) GN=YFL054C PE=1 SV=1 1.43e-54	-	PIK54441.1 putative aquaporin-9-like [Apostichopus japonicus] 1.17e-41	-
TRINITY_DN13992_c0_g2	12.6374	114.786	-3.18318	3.87493e-05	0.00137697	down	cd12885, SPRY_RanBP_like, SPRY domain in Ran binding proteins, SSH4, HECT E3 and SPRYD3. This family includes SPRY domains found in Ran binding proteins (RBP or RanBPM) 9 and 10, SSH4 (suppressor of SHR3 null mutation protein 4), SPRY domain-containing protein 3 (SPRYD3) as well as HECT, a C-terminal catalytic domain of a subclass of ubiquitin-protein ligase (E3). RanBP9 and RanBP10 act as androg…	pfam12796, Ank_2, Ankyrin repeats (3 copies). 9.89e-06	-	KOG4177, KOG4177, KOG4177, Ankyrin [Cell wall/membrane/envelope biogenesis]. 4.16e-40	sp|P16157|ANK1_HUMAN Ankyrin-1 OS=Homo sapiens GN=ANK1 PE=1 SV=3 6.43e-37	-	XP_048242601.1 uncharacterized protein LOC124148037 [Haliotis rufescens] 9.63e-23	-
TRINITY_DN14003_c0_g2	1.62769	4.6765	-1.52261	0.00255418	0.0333746	down	-	-	-	-	-	-	-	-
TRINITY_DN14003_c0_g5	4.18247	13.8793	-1.73051	0.00118026	0.0193027	down	-	-	-	-	-	-	-	-
TRINITY_DN14003_c3_g4	34.6296	9.00317	1.9435	0.000529104	0.0106577	up	-	-	-	-	-	-	-	-
TRINITY_DN14004_c0_g1	6.57017	25.6507	-1.965	0.00443316	0.0475702	down	-	-	-	-	-	-	-	-
TRINITY_DN14005_c2_g7	3.13348	9.24408	-1.56077	0.00374668	0.0430782	down	cd19147, AKR_AKR9A3_9B1-4, Phanerochaete chrysosporium aryl-alcohol dehydrogenase [NADP(+)] (AAD) and similar proteins. Phanerochaete chrysosporium ADD (EC1.1.1.91) is a founding member of aldo-keto reductase family 9 member A3. It is involved in lignin degradation and reduces aromatic benzaldehydes to their respective alcohols in the presence of NADP(H). This family also includes Saccharomyces c…	pfam00248, Aldo_ket_red, Aldo/keto reductase family. This family includes a number of K+ ion channel beta chain regulatory domains - these are reported to have oxidoreductase activity. 1.05e-10	-	KOG1575, KOG1575, KOG1575, Voltage-gated shaker-like K+ channel, subunit beta/KCNAB [Energy production and conversion]. 2.58e-14	sp|Q00258|NORA_ASPPA Norsolorinic acid reductase A OS=Aspergillus parasiticus GN=norA PE=3 SV=1 6.72e-07	-	CAF1377507.1 unnamed protein product [Rotaria sp. Silwood1] >CAF3559042.1 unnamed protein product [Rotaria sp. Silwood1] >CAF3564159.1 unnamed protein product [Rotaria sp. Silwood1] >CAF3793848.1 unnamed protein product [Rotaria sp. Silwood1] >CAF4624531.1 unnamed protein product [Rotaria sp. Silwood1] 2.11e-114	-
TRINITY_DN14006_c0_g3	37.1372	76.2939	-1.0387	0.00419935	0.0462481	down	cd19143, AKR_AKR6C1_2, AKR6C family of aldo-keto reductase (AKR). Voltage-gated potassium channel subunit beta (KCAB) from Arabidopsis thaliana and Egeria densa are founding members of aldo-keto reductase family 6 member C1 (AKR6C1) and C2 (AKR6C2), respectively. KCAB, also called Shaker channel b-subunit, or K(+) channel subunit beta, or potassium voltage beta 1, or KV-beta1, or KAB1, is a proba…	pfam00248, Aldo_ket_red, Aldo/keto reductase family. This family includes a number of K+ ion channel beta chain regulatory domains - these are reported to have oxidoreductase activity. 2.14e-29	-	KOG1575, KOG1575, KOG1575, Voltage-gated shaker-like K+ channel, subunit beta/KCNAB [Energy production and conversion]. 4.54e-67	sp|O59826|KCAB_SCHPO Putative voltage-gated potassium channel subunit beta OS=Schizosaccharomyces pombe (strain 972 / ATCC 24843) GN=SPCC965.06 PE=3 SV=1 4.74e-136	GO:0006810, transport;GO:0006811, ion transport;GO:0006812, cation transport;GO:0006813, potassium ion transport;GO:0008150, biological_process;GO:0009987, cellular process;GO:0015672, monovalent inorganic cation transport;GO:0030001, metal ion transport;GO:0034220, ion transmembrane transport;GO:0051179, localization;GO:0051234, establishment of localization;GO:0055085, transmembrane transport;G…	KAJ3023125.1 hypothetical protein HDU68_008767 [Siphonaria sp. JEL0065] 1.94e-121	-
TRINITY_DN14023_c0_g2	2.68475	7.89319	-1.55582	0.000733518	0.0133934	down	cd17371, MFS_MucK, Cis,cis-muconate transport protein and similar proteins of the Major Facilitator Superfamily. This subfamily is composed of Acinetobacter sp. Cis,cis-muconate transport protein (MucK), Escherichia coli putative sialic acid transporter 1, and similar proteins. MucK functions in the uptake of muconate and allows Acinetobacter calcoaceticus ADP1 (BD413) to grow on exogenous cis,ci…	pfam00083, Sugar_tr, Sugar (and other) transporter. 1.76e-07	-	KOG0253, KOG0253, KOG0253, Synaptic vesicle transporter SV2 (major facilitator superfamily) [General function prediction only]. 4.06e-07	sp|P36035|JEN1_YEAST Carboxylic acid transporter protein homolog OS=Saccharomyces cerevisiae (strain ATCC 204508 / S288c) GN=JEN1 PE=1 SV=1 3.92e-86	GO:0000322, storage vacuole;GO:0000323, lytic vacuole;GO:0000324, fungal-type vacuole;GO:0003674, molecular_function;GO:0005215, transporter activity;GO:0005342, organic acid transmembrane transporter activity;GO:0005575, cellular_component;GO:0005622, intracellular;GO:0005623, cell;GO:0005737, cytoplasm;GO:0005739, mitochondrion;GO:0005773, vacuole;GO:0005886, plasma membrane;GO:0006810, transpo…	CAF1392163.1 unnamed protein product [Adineta steineri] >CAF1611485.1 unnamed protein product [Adineta steineri] 7.47e-169	-
TRINITY_DN1403_c0_g1	1.99155	0.290802	2.77578	0.00284533	0.0359328	up	-	-	-	-	-	-	-	-
TRINITY_DN14039_c1_g1	104.253	22.2713	2.22683	0.00027352	0.00654778	up	-	-	-	-	-	-	-	-
TRINITY_DN14043_c1_g1	63.7401	20.6434	1.62652	0.00331933	0.0399211	up	cd04144, Ras2, Rat sarcoma (Ras) family 2 of small guanosine triphosphatases (GTPases). The Ras2 subfamily, found exclusively in fungi, was first identified in Ustilago maydis. In U. maydis, Ras2 is regulated by Sql2, a protein that is homologous to GEFs (guanine nucleotide exchange factors) of the CDC25 family. Ras2 has been shown to induce filamentous growth, but the signaling cascade through w…	pfam00071, Ras, Ras family. Includes sub-families Ras, Rab, Rac, Ral, Ran, Rap Ypt1 and more. Shares P-loop motif with GTP_EFTU, arf and myosin_head. See pfam00009 pfam00025, pfam00063. As regards Rab GTPases, these are important regulators of vesicle formation, motility and fusion. They share a fold in common with all Ras GTPases: this is a six-stranded beta-sheet surrounded by five alpha-helice…	K07827-ko04810 Regulation of actin cytoskeleton;ko04072 Phospholipase D signaling pathway;ko04071 Sphingolipid signaling pathway;ko04210 Apoptosis;ko04213 Longevity regulating pathway - multiple species;ko04540 Gap junction;ko04720 Long-term potentiation;ko04910 Insulin signaling pathway;ko04660 T cell receptor signaling pathway;ko04014 Ras signaling pathway;ko04360 Axon guidance;ko04726 Serotone…	KOG0395, KOG0395, KOG0395, Ras-related GTPase [General function prediction only]. 6.07e-40	sp|Q01387|RAS2_NEUCR Protein ras-2 OS=Neurospora crassa (strain ATCC 24698 / 74-OR23-1A / CBS 708.71 / DSM 1257 / FGSC 987) GN=ras-2 PE=3 SV=2 3.13e-66	-	KAJ3017329.1 Ras GTPase ras2 [Siphonaria sp. JEL0065] 1.63e-47	-
TRINITY_DN14046_c0_g1	84.4971	261.439	-1.6295	4.63961e-05	0.00163481	down	cd01160, LCAD, Long chain acyl-CoA dehydrogenase. LCAD is an acyl-CoA dehydrogenases (ACAD), which is found in the mitochondria of eukaryotes and in some prokaryotes. It catalyzes the alpha, beta dehydrogenation of the corresponding trans-enoyl-CoA by FAD, which becomes reduced. The reduced form of LCAD is reoxidized in the oxidative half-reaction by electron-transferring flavoprotein (ETF), from…	pfam03583, LIP, Secretory lipase. These lipases are expressed and secreted during the infection cycle of these pathogens. In particular, C. albicans has a large number of different lipases, possibly reflecting broad lipolytic activity, which may contribute to the persistence and virulence of C. albicans in human tissue. 1.56e-37	-	KOG0137, KOG0137, KOG0137, Very-long-chain acyl-CoA dehydrogenase [Lipid transport and metabolism]. 3.04e-33	sp|D4AX63|LIPA_ARTBC Lipase A OS=Arthroderma benhamiae (strain ATCC MYA-4681 / CBS 112371) GN=ARB_00790 PE=3 SV=1 3.93e-72	-	KAJ3031679.1 hypothetical protein HDU68_001196 [Siphonaria sp. JEL0065] 5.46e-169	-
TRINITY_DN14055_c1_g4	7.73313	0.531882	3.86188	0.000231065	0.00573956	up	cd01803, Ubl_ubiquitin, ubiquitin-like (Ubl) domain found in ubiquitin. Ubiquitin is a protein modifier in eukaryotes that is involved in various cellular processes, including transcriptional regulation, cell cycle control, and DNA repair. Ubiquitination is comprised of a cascade of E1, E2 and E3 enzymes that results in a covalent bond between the C-terminus of ubiquitin and the epsilon-amino gro…	pfam00240, ubiquitin, Ubiquitin family. This family contains a number of ubiquitin-like proteins: SUMO (smt3 homolog), Nedd8, Elongin B, Rub1, and Parkin. A number of them are thought to carry a distinctive five-residue motif termed the proteasome-interacting motif (PIM), which may have a biologically significant role in protein delivery to proteasomes and recruitment of proteasomes to transcript…	K08770-ko03320 PPAR signaling pathway	KOG0003, KOG0003, KOG0003, Ubiquitin/60s ribosomal protein L40 fusion [Translation, ribosomal structure and biogenesis]. 1.44e-12	sp|P62976|UBIQP_CRIGR Polyubiquitin OS=Cricetulus griseus PE=2 SV=2 0.0	GO:0000122, negative regulation of transcription by RNA polymerase II;GO:0000165, MAPK cascade;GO:0000187, activation of MAPK activity;GO:0000209, protein polyubiquitination;GO:0000715, nucleotide-excision repair, DNA damage recognition;GO:0000731, DNA synthesis involved in DNA repair;GO:0000902, cell morphogenesis;GO:0001666, response to hypoxia;GO:0001932, regulation of protein phosphorylation;…	ABV55648.1 Ubc protein, partial [Penaeus monodon] 8.95e-268	Homo sapiens cDNA clone IMAGE:2822684, partial cds 4.16e-49
[truncated: 599 more rows]
