# Supplementary material for: The Response of Growth and Transcriptome Profiles of Tea Grey Blight Disease Pathogen Pestalotiopsis theae to the Variation of Exogenous L-Theanine
Source: Int J Mol Sci. 2024 Mar 20;25(6):3493. doi: 10.3390/ijms25063493 (PMC10971465; doi:10.3390/ijms25063493)
Supplement: Supplementary file 1 [file ijms-25-03493-s001.zip › ijms-2863686-supplementary/Supplemental Table S6.xlsx]

## Sheet: Sheet1
Table S6. Different module expression patterns of all DEGs in all samples
Gene ID	Centered log2(TPM+ 1)									Subcluster	CDD	PFAM	KEGG	KOG	Swissprot	GO	NR	NT
	Th0-1	Th0-2	Th0-3	Th2-1	Th2-2	Th2-3	Th4-1	Th4-2	Th4-3
TRINITY_DN10017_c0_g1	0.767881	0.916728	0.775922	-0.238573	-0.659183	-0.483032	0.160737	-0.57846	-0.662019	1	-	-	-	-	-	-	-	-
TRINITY_DN10020_c0_g1	0.394143	0.665886	1.42793	-1.15448	-0.512949	-1.0197	0.409952	0.0401924	-0.250967	1	cd12148, fungal_TF_MHR, fungal transcription factor regulatory middle homology region. This domain is present in the large family of fungal zinc cluster transcription factors that contain an N-terminal GAL4-like C6 zinc binuclear cluster DNA-binding domain. Examples of members of this large fungal group are the following Saccharomyces cerevisiae transcription factors, GAL4, STB5, DAL81, CAT8, RDR…	-	-	-	sp|O59741|YN25_SCHPO Uncharacterized transcriptional regulatory protein C530.05 OS=Schizosaccharomyces pombe (strain 972 / ATCC 24843) GN=SPBC530.05 PE=3 SV=2 7.16e-21	-	-	-
TRINITY_DN10027_c0_g1	0.886621	1.23544	1.49578	-0.102059	-1.33845	-0.864829	-0.83557	-0.487076	0.0101461	1	-	pfam12898, Stc1, Stc1 domain. The domain contains 8 conserved cysteines that may bind to zinc. In S. pombe this protein acts as a protein linker which links the chromatin modifying CLRC complex to RNAi by tethering it to the RITS complex. The region is reported as a LIM domain here, but has a slightly different arrangement of its CxxC pairs from the Pfam LIM domain pfam00412, hence why it is not …	-	-	-	-	-	-
TRINITY_DN10032_c0_g1	1.02495	1.50635	2.11437	-0.606616	-1.86463	-1.54616	1.05858	-0.220177	-1.46667	1	cd01042, DMQH, Demethoxyubiquinone hydroxylase, ferritin-like diiron-binding domain. Demethoxyubiquinone hydroxylases (DMQH) are members of the ferritin-like, diiron-carboxylate family which are present in eukaryotes (the CLK-1/CAT5 family) and prokaryotes (the Coq7 family). DMQH participates in one of the last steps of ubiquinone biosysnthesis and is responsible for DMQ hydroxylation, resulting …	pfam03232, COQ7, Ubiquinone biosynthesis protein COQ7. Members of this family contain two repeats of about 90 amino acids, that contains two conserved motifs. One of these DXEXXH may be part of an enzyme active site. 3.56e-55	K06134-ko00130 Ubiquinone and other terpenoid-quinone biosynthesis	KOG4061, KOG4061, KOG4061, DMQ mono-oxygenase/Ubiquinone biosynthesis protein COQ7/CLK-1/CAT5 [General function prediction only]. 3.60e-49	sp|P41735|COQ7_YEAST 5-demethoxyubiquinone hydroxylase, mitochondrial OS=Saccharomyces cerevisiae (strain ATCC 204508 / S288c) GN=CAT5 PE=1 SV=2 2.31e-47	GO:0003674, molecular_function;GO:0003824, catalytic activity;GO:0004497, monooxygenase activity;GO:0005575, cellular_component;GO:0005622, intracellular;GO:0005623, cell;GO:0005737, cytoplasm;GO:0005739, mitochondrion;GO:0005740, mitochondrial envelope;GO:0005743, mitochondrial inner membrane;GO:0006732, coenzyme metabolic process;GO:0006733, oxidoreduction coenzyme metabolic process;GO:0006743,…	ELU14971.1 hypothetical protein CAPTEDRAFT_148541 [Capitella teleta] 1.07e-49	-
TRINITY_DN10041_c0_g1	0.336035	0.705917	1.48526	-1.04633	-0.701813	-0.646103	0.959098	-0.123186	-0.968872	1	cd10527, SET_LSMT, SET domain found in Rubisco large subunit methyltransferase (LSMT) and similar proteins. Rubisco LSMT is a non-histone protein methyl transferase responsible for the trimethylation of lysine14 in the large subunit of Rubisco (ribulose-1,5-bisphosphate carboxylase/oxygenase). The family also includes SET domain-containing proteins, SETD3, SETD4 and SETD6, which belong to methylt…	-	-	KOG1337, KOG1337, KOG1337, N-methyltransferase [General function prediction only]. 1.21e-12	sp|O14135|SET8_SCHPO SET domain-containing protein 8 OS=Schizosaccharomyces pombe (strain 972 / ATCC 24843) GN=set8 PE=3 SV=1 6.47e-28	GO:0003674, molecular_function;GO:0003824, catalytic activity;GO:0006464, cellular protein modification process;GO:0006479, protein methylation;GO:0006807, nitrogen compound metabolic process;GO:0008150, biological_process;GO:0008152, metabolic process;GO:0008168, methyltransferase activity;GO:0008170, N-methyltransferase activity;GO:0008213, protein alkylation;GO:0008276, protein methyltransfera…	XP_004069852.1 N-lysine methyltransferase SETD6 [Oryzias latipes] 5.76e-08	-
TRINITY_DN10054_c0_g1	2.02617	1.29836	0.938152	-0.0192988	-1.37529	-0.49331	-1.04728	-0.547076	-0.780413	1	-	-	-	-	-	-	-	-
TRINITY_DN10074_c0_g1	0.370338	0.589369	2.08996	-0.916334	-0.714137	-0.822772	0.901968	-0.231742	-1.26665	1	-	-	-	-	-	-	-	-
TRINITY_DN10096_c0_g1	0.924205	0.782582	0.903711	-0.645403	-0.886401	-0.785944	0.196398	-0.279017	-0.210132	1	-	pfam18951, DUF5695, Family of unknown function (DUF5695). This is a family of unknown function mainly found in fungi and bacteria. 0.0	-	-	-	-	UJR06967.1 hypothetical protein I4U23_011255 [Adineta vaga] 3.55e-95	-
TRINITY_DN10100_c0_g1	0.392218	0.522899	1.47995	-0.946165	-0.673577	-1.08338	1.08667	0.139561	-0.918181	1	cd02576, PseudoU_synth_ScPUS7, Pseudouridine synthase, TruD family. This group consists of eukaryotic pseudouridine synthases similar to Saccharomyces cerevisiae Pus7. Pseudouridine synthases catalyze the isomerization of specific uridines in an RNA molecule to pseudouridines (5-ribosyluracil, psi). Saccharomyces cerevisiae Pus7 makes psi35 in U2 small nuclear RNA (U2 snRNA), psi13 in cytoplasmic…	pfam01142, TruD, tRNA pseudouridine synthase D (TruD). TruD is responsible for synthesis of pseudouridine from uracil-13 in transfer RNAs. The structure of TruD reveals an overall V-shaped molecule which contains an RNA-binding cleft. 5.93e-29	-	KOG2339, KOG2339, KOG2339, Uncharacterized conserved protein [Function unknown]. 4.96e-69	sp|Q08647|PUS7_YEAST Multisubstrate pseudouridine synthase 7 OS=Saccharomyces cerevisiae (strain ATCC 204508 / S288c) GN=PUS7 PE=1 SV=1 1.65e-70	GO:0000154, rRNA modification;GO:0000455, enzyme-directed rRNA pseudouridine synthesis;GO:0001522, pseudouridine synthesis;GO:0003674, molecular_function;GO:0003824, catalytic activity;GO:0005575, cellular_component;GO:0005622, intracellular;GO:0005623, cell;GO:0005634, nucleus;GO:0005737, cytoplasm;GO:0006139, nucleobase-containing compound metabolic process;GO:0006364, rRNA processing;GO:000639…	XP_052780104.1 pseudouridylate synthase 7 homolog isoform X2 [Mya arenaria] 1.90e-57	-
TRINITY_DN1012_c0_g1	0.239336	0.257238	1.49075	-1.51564	-0.456827	-1.37881	1.51264	0.527593	-0.676278	1	-	-	-	-	-	-	-	-
TRINITY_DN10135_c0_g1	0.558816	0.733753	1.40685	-0.677062	-1.72281	-1.04346	0.658667	0.0462246	0.0390292	1	cd19093, AKR_AtPLR-like, Arabidopsis thaliana pyridoxal reductase (PLR) and similar proteins. Arabidopsis thaliana PLR (EC 1.1.1.65) is the prototype of this family. It catalyzes the reduction of pyridoxal (PL) with NADPH and oxidation of pyridoxine (PN) with NADP(+), and is involved in the PLP salvage pathway. 6.99e-63	pfam00248, Aldo_ket_red, Aldo/keto reductase family. This family includes a number of K+ ion channel beta chain regulatory domains - these are reported to have oxidoreductase activity. 7.05e-27	-	KOG1575, KOG1575, KOG1575, Voltage-gated shaker-like K+ channel, subunit beta/KCNAB [Energy production and conversion]. 1.00e-21	sp|Q94A68|Y1669_ARATH Uncharacterized oxidoreductase At1g06690, chloroplastic OS=Arabidopsis thaliana GN=At1g06690 PE=1 SV=1 5.31e-45	-	CAF0920545.1 unnamed protein product [Rotaria sordida] 3.07e-54	-
TRINITY_DN10137_c0_g1	0.88189	0.621717	1.1129	-0.687031	-0.98663	-1.35404	0.281654	-0.275193	0.404739	1	-	-	-	-	-	-	-	-
TRINITY_DN10252_c0_g1	0.282696	0.728966	1.42738	-1.09743	-0.549201	-0.70516	1.23504	0.0181232	-1.34041	1	-	pfam14500, MMS19_N, Dos2-interacting transcription regulator of RNA-Pol-II. This domain, along with the C-terminal part, pfam12460, is an essential component of a silencing complex in fission yeast that contains Dos2, Rik1, Mms19 and Cdc20 (the catalytic subunit of DNA polymerase-epsilon). This complex regulates RNA polymerase II (RNA Pol II) activity in heterochromatin and is required for DNA re…	-	KOG1967, KOG1967, KOG1967, DNA repair/transcription protein Mms19 [Replication, recombination and repair, Transcription]. 1.75e-12	sp|Q54J88|MMS19_DICDI MMS19 nucleotide excision repair protein homolog OS=Dictyostelium discoideum GN=mms19 PE=3 SV=2 1.56e-16	-	XP_013774837.2 MMS19 nucleotide excision repair protein homolog [Limulus polyphemus] >XP_022241973.1 MMS19 nucleotide excision repair protein homolog [Limulus polyphemus] >XP_022241974.1 MMS19 nucleotide excision repair protein homolog [Limulus polyphemus] >XP_022241975.1 MMS19 nucleotide excision repair protein homolog [Limulus polyphemus] 2.19e-20	-
TRINITY_DN10275_c0_g1	0.467489	0.120557	1.22492	-1.39428	-1.03459	-0.804385	1.82507	0.324035	-0.728809	1	cd01886, EF-G, Elongation factor G (EF-G) family involved in both the elongation and ribosome recycling phases of protein synthesis. Translocation is mediated by EF-G (also called translocase). The structure of EF-G closely resembles that of the complex between EF-Tu and tRNA. This is an example of molecular mimicry; a protein domain evolved so that it mimics the shape of a tRNA molecule. EF-G in…	pfam00009, GTP_EFTU, Elongation factor Tu GTP binding domain. This domain contains a P-loop motif, also found in several other families such as pfam00071, pfam00025 and pfam00063. Elongation factor Tu consists of three structural domains, this plus two C-terminal beta barrel domains. 4.01e-23	-	KOG0465, KOG0465, KOG0465, Mitochondrial elongation factor [Translation, ribosomal structure and biogenesis]. 2.22e-91	sp|B8NDZ1|RRF2M_ASPFN Ribosome-releasing factor 2, mitochondrial OS=Aspergillus flavus (strain ATCC 200026 / FGSC A1120 / NRRL 3357 / JCM 12722 / SRRC 167) GN=mef2 PE=3 SV=1 6.59e-07	GO:0000002, mitochondrial genome maintenance;GO:0000166, nucleotide binding;GO:0001882, nucleoside binding;GO:0001883, purine nucleoside binding;GO:0003674, molecular_function;GO:0003676, nucleic acid binding;GO:0003723, RNA binding;GO:0003746, translation elongation factor activity;GO:0003824, catalytic activity;GO:0003924, GTPase activity;GO:0005488, binding;GO:0005525, GTP binding;GO:0005575, …	PIK42111.1 putative ribosome-releasing factor 2, mitochondrial [Apostichopus japonicus] 4.62e-103	-
TRINITY_DN10291_c0_g1	0.498523	1.29691	1.82227	-1.3844	-1.51694	-2.04006	1.53045	0.434481	-0.641239	1	-	pfam14269, Arylsulfotran_2, Arylsulfotransferase (ASST). 2.23e-82	-	-	-	-	-	-
TRINITY_DN10309_c0_g1	0.772475	1.30327	2.05261	-0.57531	-0.950777	-0.905962	-0.452512	-0.541865	-0.701933	1	cd11060, CYP57A1-like, cytochrome P450 family 57, subfamily A, polypeptide 1 and similar cytochrome P450s. This family is composed of fungal cytochrome P450s including: Nectria haematococca cytochrome P450 57A1 (CYP57A1), also called pisatin demethylase, which detoxifies the phytoalexin pisatin; Penicillium aethiopicum P450 monooxygenase gsfF, also called griseofulvin synthesis protein F, which c…	pfam00067, p450, Cytochrome P450. Cytochrome P450s are haem-thiolate proteins involved in the oxidative degradation of various compounds. They are particularly well known for their role in the degradation of environmental toxins and mutagens. They can be divided into 4 classes, according to the method by which electrons from NAD(P)H are delivered to the catalytic site. Sequence conservation is re…	-	KOG0157, KOG0157, KOG0157, Cytochrome P450 CYP4/CYP19/CYP26 subfamilies [Secondary metabolites biosynthesis, transport and catabolism, Lipid transport and metabolism]. 2.75e-23	sp|I7LRH3|MAPDE_PENBR Cytochrome P450 monooxygenase mpaDE OS=Penicillium brevicompactum GN=mpaDE PE=1 SV=1 8.54e-38	-	KAG0429187.1 hypothetical protein HPB47_023868 [Ixodes persulcatus] 2.57e-19	-
TRINITY_DN10322_c0_g1	0.76351	0.675038	1.31661	-0.773587	-0.662752	-1.06759	0.526821	-0.305166	-0.47289	1	cd18009, DEXHc_HELLS_SMARCA6, DEXH-box helicase domain of HELLS. HELLS (helicase, lymphoid specific, also known as Lsh or SMARCA6) is a major epigenetic regulator crucial for normal heterochromatin structure and function. HELLS is part of the DEAD-like helicase superfamily, a diverse family of proteins involved in ATP-dependent RNA or DNA unwinding. This domain contains the ATP-binding region. 3.…	pfam00176, SNF2_N, SNF2 family N-terminal domain. This domain is found in proteins involved in a variety of processes including transcription regulation (e.g., SNF2, STH1, brahma, MOT1), DNA repair (e.g., ERCC6, RAD16, RAD5), DNA recombination (e.g., RAD54), and chromatin unwinding (e.g., ISWI) as well as a variety of other proteins with little functional information (e.g., lodestar, ETL1). 8.99e…	-	KOG0385, KOG0385, KOG0385, Chromatin remodeling complex WSTF-ISWI, small subunit [Transcription]. 1.75e-60	sp|Q9NRZ9|HELLS_HUMAN Lymphoid-specific helicase OS=Homo sapiens GN=HELLS PE=1 SV=1 1.65e-68	GO:0003674, molecular_function;GO:0003824, catalytic activity;GO:0005575, cellular_component;GO:0005622, intracellular;GO:0005623, cell;GO:0005634, nucleus;GO:0006139, nucleobase-containing compound metabolic process;GO:0006259, DNA metabolic process;GO:0006310, DNA recombination;GO:0006312, mitotic recombination;GO:0006725, cellular aromatic compound metabolic process;GO:0006807, nitrogen compou…	KAJ3016621.1 hypothetical protein HDU68_012113 [Siphonaria sp. JEL0065] 5.70e-150	-
TRINITY_DN10335_c0_g1	0.884067	0.717958	2.02996	-1.04588	-0.739437	-0.946011	1.01277	-0.449459	-1.46397	1	cd01941, YeiC_kinase_like, YeiC-like sugar kinase. Found in eukaryotes and bacteria, YeiC-like kinase is part of the ribokinase/pfkB sugar kinase superfamily. Its oligomerization state is unknown at this time. 6.78e-28	pfam04227, Indigoidine_A, Indigoidine synthase A like protein. Indigoidine is a blue pigment synthesized by Erwinia chrysanthemi implicated in pathogenicity and protection from oxidative stress. IdgA is involved in indigoidine biosynthesis, but its specific function is unknown. The recommended name for this protein is now pseudouridine-5'-phosphate glycosidase. 5.82e-94	K16330-ko00240 Pyrimidine metabolism	KOG3009, KOG3009, KOG3009, Predicted carbohydrate kinase, contains PfkB domain [General function prediction only]. 3.75e-70	sp|Q9USY1|YOW5_SCHPO Pseudouridine-metabolizing bifunctional protein C1861.05 OS=Schizosaccharomyces pombe (strain 972 / ATCC 24843) GN=SPBC1861.05 PE=3 SV=1 1.05e-105	GO:0001522, pseudouridine synthesis;GO:0003674, molecular_function;GO:0003824, catalytic activity;GO:0004730, pseudouridylate synthase activity;GO:0006139, nucleobase-containing compound metabolic process;GO:0006213, pyrimidine nucleoside metabolic process;GO:0006725, cellular aromatic compound metabolic process;GO:0006793, phosphorus metabolic process;GO:0006796, phosphate-containing compound me…	XP_015246498.1 PREDICTED: pseudouridine-metabolizing bifunctional protein C1861.05-like [Cyprinodon variegatus] 1.55e-93	-
TRINITY_DN10346_c0_g1	0.437119	2.52379	0.0593394	-0.644206	-1.78079	-0.892839	1.04494	0.166177	-0.913526	1	cd11051, CYP59-like, cytochrome P450 family 59 and similar cytochrome P450s. This family is composed of Aspergillus nidulans cytochrome P450 59 (CYP59), also called sterigmatocystin biosynthesis P450 monooxygenase stcS, and similar fungal proteins. CYP59 is required for the conversion of versicolorin A to sterigmatocystin. This family belongs to the large cytochrome P450 (P450, CYP) superfamily o…	pfam00067, p450, Cytochrome P450. Cytochrome P450s are haem-thiolate proteins involved in the oxidative degradation of various compounds. They are particularly well known for their role in the degradation of environmental toxins and mutagens. They can be divided into 4 classes, according to the method by which electrons from NAD(P)H are delivered to the catalytic site. Sequence conservation is re…	-	KOG0157, KOG0157, KOG0157, Cytochrome P450 CYP4/CYP19/CYP26 subfamilies [Secondary metabolites biosynthesis, transport and catabolism, Lipid transport and metabolism]. 7.94e-35	sp|Q00714|STCS_EMENI Probable sterigmatocystin biosynthesis P450 monooxygenase stcS OS=Emericella nidulans (strain FGSC A4 / ATCC 38163 / CBS 112.46 / NRRL 194 / M139) GN=stcS PE=1 SV=2 2.78e-44	-	XP_020863343.1 cytochrome P450 4V2 [Phascolarctos cinereus] 4.07e-32	-
TRINITY_DN10371_c0_g1	0.303341	0.771911	1.76923	-1.12601	-1.53513	-1.3699	1.89696	0.598581	-1.30899	1	cd07098, ALDH_F15-22, Aldehyde dehydrogenase family 15A1 and 22A1-like. Aldehyde dehydrogenase family members ALDH15A1 (Saccharomyces cerevisiae YHR039C) and ALDH22A1 (Arabidopsis thaliana, EC=1.2.1.3), and similar sequences, are in this CD. Significant improvement of stress tolerance in tobacco plants was observed by overexpressing the ALDH22A1 gene from maize (Zea mays) and was accompanied by a…	pfam00171, Aldedh, Aldehyde dehydrogenase family. This family of dehydrogenases act on aldehyde substrates. Members use NADP as a cofactor. The family includes the following members: The prototypical members are the aldehyde dehydrogenases EC:1.2.1.3. Succinate-semialdehyde dehydrogenase EC:1.2.1.16. Lactaldehyde dehydrogenase EC:1.2.1.22. Benzaldehyde dehydrogenase EC:1.2.1.28. Methylmalonate-se…	-	KOG2454, KOG2454, KOG2454, Betaine aldehyde dehydrogenase [Energy production and conversion]. 6.80e-170	sp|P38694|MSC7_YEAST Putative aldehyde dehydrogenase-like protein YHR039C OS=Saccharomyces cerevisiae (strain ATCC 204508 / S288c) GN=MSC7 PE=1 SV=1 1.22e-175	GO:0000003, reproduction;GO:0000280, nuclear division;GO:0003674, molecular_function;GO:0003824, catalytic activity;GO:0004029, aldehyde dehydrogenase (NAD) activity;GO:0005575, cellular_component;GO:0005622, intracellular;GO:0005623, cell;GO:0005737, cytoplasm;GO:0005783, endoplasmic reticulum;GO:0006139, nucleobase-containing compound metabolic process;GO:0006259, DNA metabolic process;GO:00063…	CAF4517190.1 unnamed protein product [Rotaria sp. Silwood2] 1.48e-56	-
TRINITY_DN10400_c0_g1	0.664674	1.31121	0.984269	-0.0556809	-1.15081	-0.835379	-0.172614	-0.443971	-0.3017	1	-	-	-	-	-	-	-	-
TRINITY_DN10406_c0_g1	1.30535	1.4325	1.16604	-0.266714	-1.1477	-0.622948	-0.523631	-0.86776	-0.475135	1	-	-	-	-	-	-	-	-
TRINITY_DN10425_c0_g1	1.44556	1.52832	1.90817	-0.39798	-1.46562	-0.901016	-0.0914825	-1.26692	-0.759035	1	-	-	-	-	-	-	-	-
TRINITY_DN10477_c0_g1	1.2517	1.29979	0.616887	-0.736526	-1.28402	-0.989215	0.196001	-0.125364	-0.229255	1	-	pfam11204, DUF2985, Protein of unknown function (DUF2985). This eukaryotic family of proteins has no known function. 1.79e-11	-	-	-	-	-	-
TRINITY_DN10495_c0_g1	1.21884	1.51061	2.60609	-0.856461	-2.48161	-0.940925	-1.08654	-0.0751458	0.10513	1	-	-	-	-	-	-	-	-
TRINITY_DN10553_c0_g1	1.93984	1.51314	1.45444	-0.692514	-0.913103	-0.458427	-1.51398	-0.959283	-0.370118	1	-	-	-	-	-	GO:0000976, transcription regulatory region sequence-specific DNA binding;GO:0000977, RNA polymerase II regulatory region sequence-specific DNA binding;GO:0000978, RNA polymerase II proximal promoter sequence-specific DNA binding;GO:0000981, RNA polymerase II transcription factor activity, sequence-specific DNA binding;GO:0000982, transcription factor activity, RNA polymerase II proximal promoter…	-	-
TRINITY_DN10578_c0_g1	1.55919	1.40378	0.514543	-0.292942	-1.57885	-0.522845	-0.779916	-0.394354	0.0913927	1	-	pfam03403, PAF-AH_p_II, Platelet-activating factor acetylhydrolase, isoform II. Platelet-activating factor acetylhydrolase (PAF-AH) is a subfamily of phospholipases A2, responsible for inactivation of platelet-activating factor through cleavage of an acetyl group. Three known PAF-AHs are the brain heterotrimeric PAF-AH Ib, whose catalytic beta and gamma subunits are aligned in pfam02266, the extr…	K01062-ko00565 Ether lipid metabolism	KOG3847, KOG3847, KOG3847, Phospholipase A2 (platelet-activating factor acetylhydrolase in humans) [Lipid transport and metabolism]. 6.96e-32	sp|Q22943|PAFA_CAEEL Platelet-activating factor acetylhydrolase homolog 2 OS=Caenorhabditis elegans GN=paf-2 PE=2 SV=2 1.13e-27	-	XP_038062918.1 platelet-activating factor acetylhydrolase-like isoform X2 [Patiria miniata] 3.23e-33	-
TRINITY_DN10585_c0_g1	1.02728	1.06115	0.785505	-0.155274	-0.735588	-0.711398	0.401215	-0.671128	-1.00176	1	-	pfam09736, Bud13, Pre-mRNA-splicing factor of RES complex. This entry is characterized by proteins with alternating conserved and low-complexity regions. Bud13 together with Snu17p and a newly identified factor, Pml1p/Ylr016c, form a novel trimeric complex. called The RES complex, pre-mRNA retention and splicing complex. Subunits of this complex are not essential for viability of yeasts but they …	-	KOG2654, KOG2654, KOG2654, Uncharacterized conserved protein [Function unknown]. 1.46e-23	sp|Q52F10|CWC26_MAGO7 Pre-mRNA-splicing factor CWC26 OS=Magnaporthe oryzae (strain 70-15 / ATCC MYA-4617 / FGSC 8958) GN=CWC26 PE=3 SV=1 4.46e-70	-	NXJ79254.1 BUD13 protein [Trogon melanurus] 4.49e-23	-
TRINITY_DN10595_c0_g1	0.126392	0.167724	1.80107	-1.10611	-1.11211	-1.2799	1.26131	0.378334	-0.236703	1	cd22055, NAC_BTF3, basal transcription factor BTF3. Basal transcription factor 3 (BTF3) plays an important role in the transcriptional regulation linked to growth and development in eukaryotes. In mammals, the BTF3 gene encodes two alternative splicing isoforms, BTF3a and BTF3b. The full length BTF3a protein excites transcription. The shortened BTF3b, which lacks the first 44 amino-terminal exten…	-	K01527-ko04214 Apoptosis - fly	KOG2240, KOG2240, KOG2240, RNA polymerase II general transcription factor BTF3 and related proteins [Transcription]. 6.94e-18	sp|A4RC23|NACB_MAGO7 Nascent polypeptide-associated complex subunit beta OS=Magnaporthe oryzae (strain 70-15 / ATCC MYA-4617 / FGSC 8958) GN=EGD1 PE=3 SV=2 1.23e-41	GO:0003674, molecular_function;GO:0005488, binding;GO:0005515, protein binding;GO:0005575, cellular_component;GO:0005622, intracellular;GO:0005623, cell;GO:0005634, nucleus;GO:0005737, cytoplasm;GO:0005829, cytosol;GO:0005840, ribosome;GO:0005844, polysome;GO:0005854, nascent polypeptide-associated complex;GO:0006457, protein folding;GO:0006458, 'de novo' protein folding;GO:0006605, protein targe…	CAI5640296.1 unnamed protein product [Mustela putorius furo] 1.57e-13	-
TRINITY_DN10620_c0_g2	0.371571	0.356613	1.43729	-1.01758	-1.49584	-0.980134	1.70315	0.208526	-0.5836	1	cd11064, CYP86A, cytochrome P450 family 86, subfamily A. This subfamily includes several Arabidopsis thaliana cytochrome P450s (CYP86A1, CYP86A2, CYP86A4, among others), Petunia x hybrida CYP86A22, and Vicia sativa CYP94A1 and CYP94A2. They are P450-dependent fatty acid omega-hydroxylases that catalyze the omega-hydroxylation of various fatty acids. CYP86A2 acts on saturated and unsaturated fatty…	pfam00067, p450, Cytochrome P450. Cytochrome P450s are haem-thiolate proteins involved in the oxidative degradation of various compounds. They are particularly well known for their role in the degradation of environmental toxins and mutagens. They can be divided into 4 classes, according to the method by which electrons from NAD(P)H are delivered to the catalytic site. Sequence conservation is re…	-	KOG0157, KOG0157, KOG0157, Cytochrome P450 CYP4/CYP19/CYP26 subfamilies [Secondary metabolites biosynthesis, transport and catabolism, Lipid transport and metabolism]. 1.81e-42	sp|P48422|C86A1_ARATH Cytochrome P450 86A1 OS=Arabidopsis thaliana GN=CYP86A1 PE=1 SV=2 3.54e-57	-	KAJ3025857.1 hypothetical protein HDU68_006584 [Siphonaria sp. JEL0065] 5.94e-53	-
TRINITY_DN10627_c0_g1	0.500405	2.68786	2.19884	-1.88646	-1.53057	-0.857768	-0.194679	-0.257485	-0.660133	1	-	-	-	-	-	-	-	-
TRINITY_DN10640_c0_g1	0.317537	3.13329	2.11477	-0.391403	-1.07209	-1.07209	-1.07209	-1.07209	-0.885837	1	-	-	-	-	-	-	-	-
TRINITY_DN10671_c0_g1	1.34968	1.7571	1.47772	-0.197083	-1.02157	-0.633385	-0.68933	-1.02157	-1.02157	1	-	pfam12138, Spherulin4, Spherulation-specific family 4. This protein is found in bacteria, archaea and eukaryotes. Proteins in this family are typically between 250 and 398 amino acids in length. There is a conserved NPG sequence motif and there are two completely conserved G residues that may be functionally important. Starvation will often induce spherulation - the production of spores - and thi…	-	-	-	-	-	-
TRINITY_DN10701_c0_g1	0.39598	1.11092	1.49952	-0.476993	-1.67075	-1.13273	1.41435	0.234177	-1.37447	1	cd11321, AmyAc_bac_euk_BE, Alpha amylase catalytic domain found in bacterial and eukaryotic branching enzymes. Branching enzymes (BEs) catalyze the formation of alpha-1,6 branch points in either glycogen or starch by cleavage of the alpha-1,4 glucosidic linkage yielding a non-reducing end oligosaccharide chain, and subsequent attachment to the alpha-1,6 position. By increasing the number of non-r…	pfam02806, Alpha-amylase_C, Alpha amylase, C-terminal all-beta domain. Alpha amylase is classified as family 13 of the glycosyl hydrolases. The structure is an 8 stranded alpha/beta barrel containing the active site, interrupted by a ~70 a.a. calcium-binding domain protruding between beta strand 3 and alpha helix 3, and a carboxyl-terminal Greek key beta-barrel domain. 6.49e-11	K00700-ko00500 Starch and sucrose metabolism	KOG0470, KOG0470, KOG0470, 1,4-alpha-glucan branching enzyme/starch branching enzyme II [Carbohydrate transport and metabolism]. 1.02e-06	sp|Q96VA4|GLGB_ASPOR 1,4-alpha-glucan-branching enzyme OS=Aspergillus oryzae (strain ATCC 42149 / RIB 40) GN=gbeA PE=2 SV=1 3.27e-10	GO:0000271, polysaccharide biosynthetic process;GO:0003674, molecular_function;GO:0003824, catalytic activity;GO:0003844, 1,4-alpha-glucan branching enzyme activity;GO:0005575, cellular_component;GO:0005622, intracellular;GO:0005623, cell;GO:0005737, cytoplasm;GO:0005975, carbohydrate metabolic process;GO:0005976, polysaccharide metabolic process;GO:0005977, glycogen metabolic process;GO:0005978,…	KAJ3017428.1 alpha-1,4-glucan branching enzyme [Siphonaria sp. JEL0065] 5.67e-306	PREDICTED: Drosophila ananassae 1,4-alpha-glucan-branching enzyme (LOC6494803), mRNA 1.65e-47
TRINITY_DN10716_c0_g1	-0.0628753	0.348723	1.77455	-0.997993	-0.642241	-1.05168	1.12148	0.475451	-0.965412	1	-	pfam05958, tRNA_U5-meth_tr, tRNA (Uracil-5-)-methyltransferase. This family consists of (Uracil-5-)-methyltransferases EC:2.1.1.35 from bacteria, archaea and eukaryotes. A 5-methyluridine (m(5)U) residue at position 54 is a conserved feature of bacterial and eukaryotic tRNAs. The methylation of U54 is catalyzed by the tRNA(m5U54)methyltransferase, which in Saccharomyces cerevisiae is encoded by t…	-	KOG2187, KOG2187, KOG2187, tRNA uracil-5-methyltransferase and related tRNA-modifying enzymes [Translation, ribosomal structure and biogenesis]. 1.52e-25	sp|Q09833|YAD7_SCHPO tRNA (uracil(54)-C(5))-methyltransferase OS=Schizosaccharomyces pombe (strain 972 / ATCC 24843) GN=SPAC4G8.07c PE=3 SV=1 2.58e-109	GO:0000014, single-stranded DNA endodeoxyribonuclease activity;GO:0001510, RNA methylation;GO:0003674, molecular_function;GO:0003824, catalytic activity;GO:0004518, nuclease activity;GO:0004519, endonuclease activity;GO:0004520, endodeoxyribonuclease activity;GO:0004527, exonuclease activity;GO:0004529, exodeoxyribonuclease activity;GO:0004536, deoxyribonuclease activity;GO:0006139, nucleobase-co…	KAJ3027116.1 tRNA(m5U54)methyltransferase [Siphonaria sp. JEL0065] 1.24e-40	-
TRINITY_DN10717_c0_g1	1.40141	1.36519	0.852284	-1.43799	-0.380379	-1.63923	-0.179224	-0.154368	0.172306	1	-	pfam05199, GMC_oxred_C, GMC oxidoreductase. This domain found associated with pfam00732. 5.88e-12	-	KOG1238, KOG1238, KOG1238, Glucose dehydrogenase/choline dehydrogenase/mandelonitrile lyase (GMC oxidoreductase family) [General function prediction only]. 4.10e-46	sp|P13006|GOX_ASPNG Glucose oxidase OS=Aspergillus niger GN=gox PE=1 SV=1 4.48e-79	-	MCL4106642.1 hypothetical protein [Idotea baltica] 5.47e-47	-
TRINITY_DN1074_c0_g1	1.40027	1.29185	1.41823	-0.561353	-0.743768	-0.579073	-0.370597	-0.799067	-1.0565	1	-	pfam11625, DUF3253, Protein of unknown function (DUF3253). This bacterial family of proteins has no known function. 1.96e-11	-	-	-	-	GAV03337.1 hypothetical protein RvY_13777-2 [Ramazzottius varieornatus] 1.62e-07	-
TRINITY_DN10758_c0_g1	0.132385	0.639021	1.73345	-0.97541	-0.981855	-1.448	1.35379	0.41173	-0.865113	1	-	pfam13824, zf-Mss51, Zinc-finger of mitochondrial splicing suppressor 51. Mss51 regulates the expression of cytochrome oxidase, so this domain is probably DNA-binding. 3.76e-19	-	-	sp|P32335|MSS51_YEAST Protein MSS51, mitochondrial OS=Saccharomyces cerevisiae (strain ATCC 204508 / S288c) GN=MSS51 PE=1 SV=2 1.09e-91	GO:0003674, molecular_function;GO:0005575, cellular_component;GO:0005622, intracellular;GO:0005623, cell;GO:0005737, cytoplasm;GO:0005739, mitochondrion;GO:0005740, mitochondrial envelope;GO:0005743, mitochondrial inner membrane;GO:0006417, regulation of translation;GO:0008150, biological_process;GO:0009889, regulation of biosynthetic process;GO:0009891, positive regulation of biosynthetic proces…	-	-
TRINITY_DN10766_c0_g1	1.24927	0.923555	2.67156	-1.86845	-2.01437	-1.41709	1.40031	-0.078302	-0.866491	1	-	pfam13520, AA_permease_2, Amino acid permease. 1.02e-13	-	KOG1289, KOG1289, KOG1289, Amino acid transporters [Amino acid transport and metabolism]. 1.80e-69	sp|P19807|HNM1_YEAST Choline transport protein OS=Saccharomyces cerevisiae (strain ATCC 204508 / S288c) GN=HNM1 PE=1 SV=1 6.85e-68	-	CAF3007320.1 unnamed protein product [Rotaria socialis] >CAF3316982.1 unnamed protein product [Rotaria socialis] >CAF3448524.1 unnamed protein product [Rotaria socialis] >CAF3510424.1 unnamed protein product [Rotaria socialis] >CAF3621810.1 unnamed protein product [Rotaria socialis] 2.20e-86	-
TRINITY_DN10785_c0_g1	1.28148	1.12129	1.20477	-0.458932	-0.658205	-0.470108	0.104216	-0.957155	-1.16735	1	-	-	-	-	-	-	-	-
TRINITY_DN108_c0_g1	0.756264	1.53562	1.03297	-0.639131	-2.2401	-0.891151	0.278061	0.132345	0.0351301	1	-	-	-	KOG1238, KOG1238, KOG1238, Glucose dehydrogenase/choline dehydrogenase/mandelonitrile lyase (GMC oxidoreductase family) [General function prediction only]. 1.17e-10	sp|Q01738|CDH_PHACH Cellobiose dehydrogenase OS=Phanerochaete chrysosporium GN=CDH-1 PE=1 SV=1 4.07e-69	-	XP_049707822.1 ecdysone oxidase [Helicoverpa armigera] 1.22e-21	-
TRINITY_DN10805_c0_g1	0.63463	0.479321	2.08533	-1.09175	-0.305713	-1.12553	1.37286	-0.621506	-1.42764	1	-	-	-	KOG3201, KOG3201, KOG3201, Uncharacterized conserved protein [Function unknown]. 4.64e-06	sp|Q4I2X5|NNT1_GIBZE Protein N-methyltransferase NNT1 OS=Gibberella zeae (strain PH-1 / ATCC MYA-4620 / FGSC 9075 / NRRL 31084) GN=NNT1 PE=3 SV=2 2.30e-84	GO:0000183, chromatin silencing at rDNA;GO:0003674, molecular_function;GO:0003824, catalytic activity;GO:0005575, cellular_component;GO:0005622, intracellular;GO:0005623, cell;GO:0005737, cytoplasm;GO:0006325, chromatin organization;GO:0006342, chromatin silencing;GO:0006355, regulation of transcription, DNA-templated;GO:0006464, cellular protein modification process;GO:0006479, protein methylati…	KAJ3021362.1 nicotinamide n-methyltransferase, partial [Siphonaria sp. JEL0065] 8.38e-29	-
TRINITY_DN10876_c0_g2	0.462273	0.980686	2.18674	-1.29398	-0.250808	-1.25358	0.281063	-0.448329	-0.664069	1	-	-	-	-	-	-	-	-
TRINITY_DN10885_c0_g1	1.46706	1.41152	2.49286	-1.43436	-1.20315	-1.43247	0.457656	-0.634174	-1.12494	1	cd05227, AR_SDR_e, aldehyde reductase, extended (e) SDRs. This subgroup contains aldehyde reductase of the extended SDR-type and related proteins. Aldehyde reductase I (aka carbonyl reductase) is an NADP-binding SDR; it has an NADP-binding motif consensus that is slightly different from the canonical SDR form and lacks the Asn of the extended SDR active site tetrad. Aldehyde reductase I catalyzes…	-	-	KOG1502, KOG1502, KOG1502, Flavonol reductase/cinnamoyl-CoA reductase [Defense mechanisms]. 3.92e-37	sp|Q9UT59|YKJ7_SCHPO Putative uncharacterized oxidoreductase C513.07 OS=Schizosaccharomyces pombe (strain 972 / ATCC 24843) GN=SPAC513.07 PE=3 SV=1 6.14e-51	-	CAF1322996.1 unnamed protein product [Rotaria sordida] >CAF1389592.1 unnamed protein product [Rotaria sordida] >CAF1586961.1 unnamed protein product [Rotaria sordida] >CAF3979869.1 unnamed protein product [Rotaria sordida] 4.66e-45	-
TRINITY_DN10921_c0_g1	1.23784	1.22321	1.3847	-1.3036	-1.03723	-1.77358	0.976722	-0.0967524	-0.611311	1	-	-	-	-	-	-	-	-
TRINITY_DN10932_c0_g1	0.818256	0.919357	1.79608	-1.65978	-2.06829	-1.32283	0.745217	0.532998	0.238999	1	-	-	-	-	-	-	-	-
TRINITY_DN10935_c0_g1	1.41841	1.79939	1.29121	0.199482	-1.9681	-0.338067	-1.47948	-0.925456	0.00260093	1	-	-	-	-	-	-	-	-
TRINITY_DN10940_c0_g1	0.673159	0.979736	1.1008	-0.630645	-0.65922	-0.816218	0.606256	-0.149999	-1.10387	1	cd06183, cyt_b5_reduct_like, Cytochrome b5 reductase catalyzes the reduction of 2 molecules of cytochrome b5 using NADH as an electron donor. Like ferredoxin reductases, these proteins have an N-terminal FAD binding subdomain and a C-terminal NADH binding subdomain, separated by a cleft, which accepts FAD. The NADH-binding moiety interacts with part of the FAD and resembles a Rossmann fold. Howev…	pfam12239, DUF3605, Protein of unknown function (DUF3605). This family of proteins is found in eukaryotes and viruses. Proteins in this family are typically between 161 and 256 amino acids in length. 4.83e-54	K00326-ko00520 Amino sugar and nucleotide sugar metabolism	KOG0534, KOG0534, KOG0534, NADH-cytochrome b-5 reductase [Coenzyme transport and metabolism, Energy production and conversion]. 3.70e-52	sp|A4R935|NCB5R_MAGO7 NADH-cytochrome b5 reductase 1 OS=Magnaporthe oryzae (strain 70-15 / ATCC MYA-4617 / FGSC 8958) GN=CBR1 PE=3 SV=1 1.94e-135	GO:0000166, nucleotide binding;GO:0002097, tRNA wobble base modification;GO:0002098, tRNA wobble uridine modification;GO:0003674, molecular_function;GO:0003824, catalytic activity;GO:0004128, cytochrome-b5 reductase activity, acting on NAD(P)H;GO:0005488, binding;GO:0005575, cellular_component;GO:0005622, intracellular;GO:0005623, cell;GO:0005634, nucleus;GO:0005737, cytoplasm;GO:0005739, mitocho…	KAJ3012910.1 NADH-cytochrome b5 reductase [Siphonaria sp. JEL0065] 6.49e-60	-
TRINITY_DN10958_c0_g1	0.174734	-0.0135191	1.52658	-1.02986	-1.304	-0.969477	1.09349	0.259354	0.262701	1	cd03431, DNA_Glycosylase_C, DNA glycosylase (MutY in bacteria and hMYH in humans) is responsible for repairing misread A*oxoG residues to C*G by removing the inappropriately paired adenine base from the DNA backbone. It belongs to the Nudix hydrolase superfamily and is important for the repair of various genotoxic lesions. Enzymes belonging to this superfamily requires a divalent cation, such as …	pfam14815, NUDIX_4, NUDIX domain. 4.99e-12	K03575-ko03410 Base excision repair	KOG2457, KOG2457, KOG2457, A/G-specific adenine DNA glycosylase [Replication, recombination and repair]. 1.64e-48	sp|Q8R5G2|MUTYH_RAT Adenine DNA glycosylase OS=Rattus norvegicus GN=Mutyh PE=2 SV=1 2.70e-09	GO:0000075, cell cycle checkpoint;GO:0000077, DNA damage checkpoint;GO:0000700, mismatch base pair DNA N-glycosylase activity;GO:0000701, purine-specific mismatch base pair DNA N-glycosylase activity;GO:0000702, oxidized base lesion DNA N-glycosylase activity;GO:0003674, molecular_function;GO:0003676, nucleic acid binding;GO:0003677, DNA binding;GO:0003684, damaged DNA binding;GO:0003690, double-…	XP_039301380.1 LOW QUALITY PROTEIN: adenine DNA glycosylase-like [Nilaparvata lugens] 1.03e-159	-
TRINITY_DN10990_c0_g1	0.596806	1.05521	1.26115	-0.349659	-1.34547	-0.822109	0.160806	-0.0561761	-0.500562	1	-	pfam17119, MMU163, Mitochondrial protein up-regulated during meiosis. This is a family of fungal mitochondrial proteins of unknown function. 1.10e-49	-	-	-	-	-	-
TRINITY_DN10998_c0_g2	-0.388976	-0.140759	2.25189	-1.15918	-1.35971	-1.46171	1.80288	1.11717	-0.661609	1	-	-	-	-	-	-	-	-
TRINITY_DN11025_c0_g1	0.648375	0.60438	1.87196	-0.844541	-0.95347	-1.05073	0.8837	0.0870413	-1.24671	1	cd17476, MFS_Amf1_MDR_like, Saccharomyces cerevisiae low affinity ammonium transporter Amf1p/YOR378W, aminotriazole resistance protein Atr1p, and similar transporters of the Major Facilitator Superfamily. Saccharomyces cerevisiae Amf1p/Ammonium Facilitator 1/YOR378W functions as a low affinity NH4+ transporter. S. cerevisiae aminotriazole resistance protein (Atr1p) is required for controlling sen…	-	-	-	sp|Q9P6J7|YHD3_SCHPO Uncharacterized MFS-type transporter C1683.03c OS=Schizosaccharomyces pombe (strain 972 / ATCC 24843) GN=SPBC1683.03c PE=3 SV=1 1.12e-72	-	CAF1199307.1 unnamed protein product [Adineta steineri] 4.19e-68	-
TRINITY_DN11057_c0_g1	0.466438	0.5865	1.43307	-0.782998	-0.84266	-0.608232	0.611733	0.00563511	-0.869485	1	-	-	-	-	-	-	-	-
TRINITY_DN11081_c0_g1	-0.00555135	0.152023	1.87559	-1.25729	-0.825066	-1.32475	1.84681	0.547898	-1.00967	1	-	-	-	-	-	-	-	-
TRINITY_DN11136_c0_g1	1.12404	0.897026	1.46513	-0.176699	-0.965589	-0.196336	-0.338992	-0.928381	-0.880195	1	-	pfam04299, FMN_bind_2, Putative FMN-binding domain. In Bacillus subtilis, family member PAI 2/ORF-2 was found to be essential for growth. The SUPERFAMILY database finds that this domain is related to FMN-binding domains, suggesting this protein is also FMN-binding. 1.28e-23	-	-	sp|Q4WVZ0|YA800_ASPFU Uncharacterized protein AFUA_5G13800 OS=Neosartorya fumigata (strain ATCC MYA-4609 / Af293 / CBS 101355 / FGSC A1100) GN=AFUA_5G13800 PE=3 SV=1 2.59e-58	-	CAF0799738.1 unnamed protein product [Didymodactylos carnosus] >CAF0921665.1 unnamed protein product [Didymodactylos carnosus] >CAF3583014.1 unnamed protein product [Didymodactylos carnosus] >CAF3700881.1 unnamed protein product [Didymodactylos carnosus] 2.85e-42	-
TRINITY_DN11148_c0_g1	0.179745	0.599223	1.98757	-0.810617	-0.703942	-0.865417	0.618858	0.105829	-1.11125	1	-	pfam04442, CtaG_Cox11, Cytochrome c oxidase assembly protein CtaG/Cox11. Cytochrome c oxidase assembly protein is essential for the assembly of functional cytochrome oxidase protein. In eukaryotes it is an integral protein of the mitochondrial inner membrane. Cox11 is essential for the insertion of Cu(I) ions to form the CuB site. This is essential for the stability of other structures in subunit…	K02258-ko00190 Oxidative phosphorylation	KOG2540, KOG2540, KOG2540, Cytochrome oxidase assembly factor COX11 [Posttranslational modification, protein turnover, chaperones]. 3.49e-58	sp|P19516|COX11_YEAST Cytochrome c oxidase assembly protein COX11, mitochondrial OS=Saccharomyces cerevisiae (strain ATCC 204508 / S288c) GN=COX11 PE=3 SV=2 5.83e-58	GO:0000313, organellar ribosome;GO:0000314, organellar small ribosomal subunit;GO:0003674, molecular_function;GO:0003824, catalytic activity;GO:0005488, binding;GO:0005507, copper ion binding;GO:0005575, cellular_component;GO:0005622, intracellular;GO:0005623, cell;GO:0005737, cytoplasm;GO:0005739, mitochondrion;GO:0005740, mitochondrial envelope;GO:0005743, mitochondrial inner membrane;GO:000575…	XP_039275060.1 LOW QUALITY PROTEIN: uncharacterized protein LOC120349165 [Nilaparvata lugens] 4.65e-73	-
TRINITY_DN11165_c0_g1	0.678415	0.352906	0.845504	-0.599764	-1.09546	-0.860551	1.09406	0.0289252	-0.444037	1	cd00312, Esterase_lipase, Esterases and lipases (includes fungal lipases, cholinesterases, etc.) These enzymes act on carboxylic esters (EC: 3.1.1.-). The catalytic apparatus involves three residues (catalytic triad): a serine, a glutamate or aspartate and a histidine.These catalytic residues are responsible for the nucleophilic attack on the carbonyl carbon atom of the ester bond. In contrast wi…	pfam00135, COesterase, Carboxylesterase family. 9.00e-24	-	KOG4389, KOG4389, KOG4389, Acetylcholinesterase/Butyrylcholinesterase [Signal transduction mechanisms]. 1.31e-24	sp|D4AZ78|LIP2_ARTBC Secreted lipase ARB_01498 OS=Arthroderma benhamiae (strain ATCC MYA-4681 / CBS 112371) GN=ARB_01498 PE=1 SV=1 2.97e-33	-	XP_042367616.1 cAMP-regulated D2 protein [Plectropomus leopardus] 1.43e-31	-
TRINITY_DN11169_c0_g1	1.37778	1.42341	1.06965	-0.739726	-0.749805	-0.633717	-0.0905014	-0.79046	-0.866621	1	cd00610, OAT_like, Acetyl ornithine aminotransferase family. This family belongs to pyridoxal phosphate (PLP)-dependent aspartate aminotransferase superfamily (fold I). The major groups in this CD correspond to ornithine aminotransferase, acetylornithine aminotransferase, alanine-glyoxylate aminotransferase, dialkylglycine decarboxylase, 4-aminobutyrate aminotransferase, beta-alanine-pyruvate ami…	pfam00202, Aminotran_3, Aminotransferase class-III. 2.40e-54	-	KOG1404, KOG1404, KOG1404, Alanine-glyoxylate aminotransferase AGT2 [Amino acid transport and metabolism]. 7.04e-54	sp|O94562|YGD3_SCHPO Uncharacterized aminotransferase C1771.03c OS=Schizosaccharomyces pombe (strain 972 / ATCC 24843) GN=SPBC1773.03c PE=3 SV=1 1.11e-98	-	MCL4121330.1 hypothetical protein [Idotea baltica] 8.79e-109	-
TRINITY_DN11199_c0_g1	0.690112	1.20387	1.49519	-0.709139	-1.41225	-1.60989	0.542279	0.0113749	-0.211546	1	-	pfam08939, DUF1917, Domain of unknown function (DUF1917). This domain is found in various hypothetical and basophilic leukaemia proteins. It has no known function. 2.21e-68	K00679-ko00561 Glycerolipid metabolism	KOG2369, KOG2369, KOG2369, Lecithin:cholesterol acyltransferase (LCAT)/Acyl-ceramide synthase [Lipid transport and metabolism]. 3.86e-69	sp|O94680|PDAT_SCHPO Phospholipid:diacylglycerol acyltransferase OS=Schizosaccharomyces pombe (strain 972 / ATCC 24843) GN=plh1 PE=1 SV=2 3.34e-175	GO:0003674, molecular_function;GO:0003824, catalytic activity;GO:0005575, cellular_component;GO:0005622, intracellular;GO:0005623, cell;GO:0005737, cytoplasm;GO:0005783, endoplasmic reticulum;GO:0005789, endoplasmic reticulum membrane;GO:0005811, lipid droplet;GO:0006629, lipid metabolic process;GO:0006638, neutral lipid metabolic process;GO:0006639, acylglycerol metabolic process;GO:0006641, tri…	CAF1479861.1 unnamed protein product [Adineta ricciae] 1.42e-77	-
TRINITY_DN11215_c0_g1	0.444097	0.703244	1.34464	-1.10272	-0.38614	-0.542402	0.74253	-0.18096	-1.02228	1	cd11665, LamB_like, Aspergillus nidulans lactam utilization protein LamB and similar proteins. This eukaryotic and bacterial subfamily of the LamB/YbgL family, includes Aspergillus nidulans protein LamB. The lamb gene locates at the lam locus of Aspergillus nidulans, consisting of two divergently transcribed genes, lamA and lamB, needed for the utilization of lactams such as 2-pyrrolidinone. Both…	pfam03746, LamB_YcsF, LamB/YcsF family. This family includes LamB. The lam locus of Aspergillus nidulans consists of two divergently transcribed genes, lamA and lamB, involved in the utilisation of lactams such as 2-pyrrolidinone. Both genes are under the control of the positive regulatory gene amdR and are subject to carbon and nitrogen metabolite repression. The exact molecular function of the …	-	-	sp|P38096|LAMB_EMENI Lactam utilization protein lamB OS=Emericella nidulans (strain FGSC A4 / ATCC 38163 / CBS 112.46 / NRRL 194 / M139) GN=lamB PE=2 SV=2 2.33e-07	-	CAF1089656.1 unnamed protein product [Rotaria sordida] 3.14e-35	-
TRINITY_DN11219_c0_g1	0.477769	0.790709	2.01634	-0.87554	-1.03258	-1.35209	0.34819	-0.189516	-0.183285	1	-	-	-	-	sp|D4ATS1|A7637_ARTBC Uncharacterized secreted protein ARB_07637 OS=Arthroderma benhamiae (strain ATCC MYA-4681 / CBS 112371) GN=ARB_07637 PE=1 SV=1 1.03e-08	-	-	-
TRINITY_DN11240_c0_g1	0.656263	1.106	1.16008	-0.493889	-1.77178	-0.755404	0.371198	-0.268151	-0.00430942	1	-	-	-	-	sp|Q12324|YVC1_YEAST Calcium channel YVC1 OS=Saccharomyces cerevisiae (strain ATCC 204508 / S288c) GN=YVC1 PE=1 SV=2 8.75e-09	-	-	-
TRINITY_DN11244_c0_g1	0.818731	0.626327	1.42638	-0.8557	-0.118862	-0.960277	0.152402	-0.0800626	-1.00894	1	cd17546, REC_hyHK_CKI1_RcsC-like, phosphoacceptor receiver (REC) domain of hybrid sensor histidine kinases/response regulators similar to Arabidopsis thaliana CKI1 and Escherichia coli RcsC. This family is composed of hybrid sensor histidine kinases/response regulators that are sensor histidine kinases (HKs) fused with a REC domain, similar to the sensor histidine kinase CKI1 from Arabidopsis tha…	-	-	KOG0519, KOG0519, KOG0519, Sensory transduction histidine kinase [Signal transduction mechanisms]. 2.20e-13	sp|Q9P7Q7|MAK1_SCHPO Peroxide stress-activated histidine kinase mak1 OS=Schizosaccharomyces pombe (strain 972 / ATCC 24843) GN=mak1 PE=3 SV=1 5.37e-14	-	KAF4530385.1 hypothetical protein B566_EDAN018531, partial [Ephemera danica] 4.08e-27	-
TRINITY_DN11252_c0_g1	1.43744	0.525614	0.412591	-1.93477	-0.645849	-1.10266	0.226643	0.242671	0.838323	1	-	-	-	-	-	-	-	-
TRINITY_DN11279_c0_g1	0.777828	1.37646	0.531343	-1.15235	-0.422782	-1.61878	0.407277	-0.183447	0.284446	1	cd20622, CYP_TRI13-like, fungal cytochrome P450s similar to TRI13. This subfamily is composed of cytochrome P450 monooxygenase TRI13, also called core trichothecene cluster (CTC) protein 13, and similar proteins. The tri13 gene is located in the trichothecene biosynthesis gene cluster in Fusarium species, which produce a great diversity of agriculturally important trichothecene toxins that differ…	pfam00067, p450, Cytochrome P450. Cytochrome P450s are haem-thiolate proteins involved in the oxidative degradation of various compounds. They are particularly well known for their role in the degradation of environmental toxins and mutagens. They can be divided into 4 classes, according to the method by which electrons from NAD(P)H are delivered to the catalytic site. Sequence conservation is re…	-	KOG0157, KOG0157, KOG0157, Cytochrome P450 CYP4/CYP19/CYP26 subfamilies [Secondary metabolites biosynthesis, transport and catabolism, Lipid transport and metabolism]. 3.76e-14	sp|B5BSX1|BAMO_GLYUR Beta-amyrin 11-oxidase OS=Glycyrrhiza uralensis GN=CYP88D6 PE=1 SV=1 5.39e-14	-	UPN65132.1 cytochrome P450-15, partial [Laodelphax striatellus] 7.89e-61	-
TRINITY_DN11304_c0_g1	0.731616	0.724811	1.2562	-0.852227	-0.829916	-0.713349	0.916959	0.123028	-1.35712	1	-	-	-	-	-	-	-	-
TRINITY_DN11311_c0_g1	0.947143	1.10848	1.09841	-0.154815	-1.04648	-0.994947	0.19901	-0.5368	-0.619997	1	-	pfam02230, Abhydrolase_2, Phospholipase/Carboxylesterase. This family consists of both phospholipases and carboxylesterases with broad substrate specificity, and is structurally related to alpha/beta hydrolases pfam00561. 1.46e-13	-	KOG2112, KOG2112, KOG2112, Lysophospholipase [Lipid transport and metabolism]. 2.56e-09	sp|Q6CGL4|APTH1_YARLI Acyl-protein thioesterase 1 OS=Yarrowia lipolytica (strain CLIB 122 / E 150) GN=YALI0A18337g PE=3 SV=1 1.41e-20	GO:0005575, cellular_component;GO:0005622, intracellular;GO:0005623, cell;GO:0005737, cytoplasm;GO:0005739, mitochondrion;GO:0043226, organelle;GO:0043227, membrane-bounded organelle;GO:0043229, intracellular organelle;GO:0043231, intracellular membrane-bounded organelle;GO:0044424, intracellular part;GO:0044444, cytoplasmic part;GO:0044464, cell part	CBY19004.1 unnamed protein product [Oikopleura dioica] 2.61e-14	-
TRINITY_DN11322_c0_g1	0.470477	0.434754	1.26841	-1.03907	-0.991519	-0.590234	1.06895	0.20117	-0.822946	1	cd12148, fungal_TF_MHR, fungal transcription factor regulatory middle homology region. This domain is present in the large family of fungal zinc cluster transcription factors that contain an N-terminal GAL4-like C6 zinc binuclear cluster DNA-binding domain. Examples of members of this large fungal group are the following Saccharomyces cerevisiae transcription factors, GAL4, STB5, DAL81, CAT8, RDR…	pfam04082, Fungal_trans, Fungal specific transcription factor domain. 1.99e-11	-	-	sp|P28349|NIT4_NEUCR Nitrogen assimilation transcription factor nit-4 OS=Neurospora crassa (strain ATCC 24698 / 74-OR23-1A / CBS 708.71 / DSM 1257 / FGSC 987) GN=nit-4 PE=3 SV=2 8.45e-29	-	KAJ3012724.1 hypothetical protein HDU68_001050 [Siphonaria sp. JEL0065] 9.93e-08	-
TRINITY_DN11340_c0_g2	0.59376	0.597965	1.23532	-0.586926	-0.99646	-0.90461	1.00967	-0.196001	-0.752716	1	-	pfam06398, Pex24p, Integral peroxisomal membrane peroxin. Peroxisomes play diverse roles in the cell, compartmentalising many activities related to lipid metabolism and functioning in the decomposition of toxic hydrogen peroxide. Sequence similarity was identified between two hypothetical proteins and the peroxin integral membrane protein Pex24p. 3.29e-38	-	-	sp|Q03370|PEX29_YEAST Peroxisomal membrane protein PEX29 OS=Saccharomyces cerevisiae (strain ATCC 204508 / S288c) GN=PEX29 PE=1 SV=1 3.10e-46	GO:0005575, cellular_component;GO:0005622, intracellular;GO:0005623, cell;GO:0005737, cytoplasm;GO:0005777, peroxisome;GO:0005778, peroxisomal membrane;GO:0005783, endoplasmic reticulum;GO:0006996, organelle organization;GO:0007031, peroxisome organization;GO:0008150, biological_process;GO:0009987, cellular process;GO:0012505, endomembrane system;GO:0016020, membrane;GO:0016021, integral componen…	-	-
TRINITY_DN11360_c0_g1	0.470702	0.0880193	1.1437	-0.971713	-0.680223	-0.735017	1.29372	0.14244	-0.751619	1	cd07380, MPP_CWF19_N, Schizosaccharomyces pombe CWF19 and related proteins, N-terminal metallophosphatase domain. CWF19 cell cycle control protein (also known as CWF19-like 1 (CWF19L1) in Homo sapiens), N-terminal metallophosphatase domain. CWF19 contains C-terminal domains similar to that found in the CwfJ cell cycle control protein. The metallophosphatase domain belongs to the metallophosphatas…	pfam04677, CwfJ_C_1, Protein similar to CwfJ C-terminus 1. This region is found in the N-terminus of Schizosaccharomyces pombe protein CwfJ. CwfJ is part of the Cdc5p complex involved in mRNA splicing. 5.23e-18	-	KOG2476, KOG2476, KOG2476, Uncharacterized conserved protein [Function unknown]. 1.70e-60	sp|P46547|PIP_AERSO Proline iminopeptidase OS=Aeromonas sobria GN=pip PE=1 SV=3 3.50e-71	-	MCL4108133.1 hypothetical protein [Idotea baltica] 2.63e-85	-
TRINITY_DN11382_c0_g1	0.33005	1.02749	1.67051	-0.895984	-0.571935	-1.26594	1.0683	-0.150374	-1.21212	1	-	pfam00153, Mito_carr, Mitochondrial carrier protein. 2.07e-08	-	KOG0768, KOG0768, KOG0768, Mitochondrial carrier protein PET8 [Energy production and conversion]. 2.75e-45	sp|Q10442|YDE9_SCHPO Uncharacterized mitochondrial carrier C12B10.09 OS=Schizosaccharomyces pombe (strain 972 / ATCC 24843) GN=SPAC12B10.09 PE=3 SV=1 1.62e-52	GO:0000095, S-adenosyl-L-methionine transmembrane transporter activity;GO:0003674, molecular_function;GO:0005215, transporter activity;GO:0005575, cellular_component;GO:0005622, intracellular;GO:0005623, cell;GO:0005737, cytoplasm;GO:0005739, mitochondrion;GO:0005740, mitochondrial envelope;GO:0005743, mitochondrial inner membrane;GO:0006810, transport;GO:0006839, mitochondrial transport;GO:00068…	XP_022085246.1 S-adenosylmethionine mitochondrial carrier protein-like isoform X1 [Acanthaster planci] 4.45e-74	-
TRINITY_DN11384_c0_g2	0.65034	0.947308	1.57899	-0.65727	-1.59193	-1.32517	0.624278	-0.0445718	-0.181978	1	-	pfam08637, NCA2, ATP synthase regulation protein NCA2. NCA2 has been shown to be required for the regulation of ATP synthase subunits Atp6p and Atp8p in Saccharomyces cerevisiae. 1.32e-103	-	-	sp|O74963|NCA2_SCHPO Nuclear control of ATPase protein 2 OS=Schizosaccharomyces pombe (strain 972 / ATCC 24843) GN=nca2 PE=3 SV=1 3.01e-48	GO:0005575, cellular_component;GO:0005622, intracellular;GO:0005623, cell;GO:0005737, cytoplasm;GO:0005739, mitochondrion;GO:0005740, mitochondrial envelope;GO:0005741, mitochondrial outer membrane;GO:0006091, generation of precursor metabolites and energy;GO:0006139, nucleobase-containing compound metabolic process;GO:0006725, cellular aromatic compound metabolic process;GO:0006807, nitrogen com…	KNC24935.1 hypothetical protein FF38_05029 [Lucilia cuprina] 2.31e-19	-
TRINITY_DN11425_c0_g1	0.88592	0.59097	1.81501	-1.08998	-0.821973	-1.34101	1.43524	-0.0993778	-1.3748	1	cd02023, UMPK, Uridine monophosphate kinase (UMPK, EC 2.7.1.48), also known as uridine kinase or uridine-cytidine kinase (UCK), catalyzes the reversible phosphoryl transfer from ATP to uridine or cytidine to yield UMP or CMP. In the primidine nucleotide-salvage pathway, this enzyme combined with nucleoside diphosphate kinases further phosphorylates UMP and CMP to form UTP and CTP. This kinase als…	pfam14681, UPRTase, Uracil phosphoribosyltransferase. This family includes the enzyme uracil phosphoribosyltransferase (EC:2.4.2.9). This enzyme catalyzes the first step of UMP biosynthesis. 2.55e-33	K00876-ko00240 Pyrimidine metabolism;ko00983 Drug metabolism - other enzymes	KOG4203, KOG4203, KOG4203, Armadillo/beta-Catenin/plakoglobin [Signal transduction mechanisms, Cytoskeleton]. 1.04e-76	sp|Q91YL3|UCKL1_MOUSE Uridine-cytidine kinase-like 1 OS=Mus musculus GN=Uckl1 PE=1 SV=1 4.41e-93	GO:0003674, molecular_function;GO:0003824, catalytic activity;GO:0004845, uracil phosphoribosyltransferase activity;GO:0004849, uridine kinase activity;GO:0005575, cellular_component;GO:0005622, intracellular;GO:0005623, cell;GO:0005634, nucleus;GO:0005737, cytoplasm;GO:0005829, cytosol;GO:0006139, nucleobase-containing compound metabolic process;GO:0006206, pyrimidine nucleobase metabolic proces…	XP_051887199.1 uridine-cytidine kinase-like 1 isoform X4 [Pristis pectinata] 2.27e-110	-
TRINITY_DN11465_c0_g1	0.222212	0.894924	2.2036	-1.16838	-0.672243	-0.809648	0.64898	-0.151067	-1.16838	1	-	-	-	KOG0637, KOG0637, KOG0637, Sucrose transporter and related proteins [Carbohydrate transport and metabolism]. 2.03e-08	sp|O14091|SUT1_SCHPO General alpha-glucoside permease OS=Schizosaccharomyces pombe (strain 972 / ATCC 24843) GN=sut1 PE=3 SV=1 1.95e-16	-	XP_005989332.2 PREDICTED: solute carrier family 45 member 3 [Latimeria chalumnae] >XP_014340127.1 PREDICTED: solute carrier family 45 member 3 [Latimeria chalumnae] >XP_014340128.1 PREDICTED: solute carrier family 45 member 3 [Latimeria chalumnae] 1.13e-06	-
TRINITY_DN11466_c0_g1	0.638203	0.512828	0.660489	-1.44847	-0.987052	-1.13213	0.414618	0.540641	0.80088	1	-	pfam05277, DUF726, Protein of unknown function (DUF726). This family consists of several uncharacterized eukaryotic proteins. 7.36e-57	-	KOG2385, KOG2385, KOG2385, Uncharacterized conserved protein [Function unknown]. 7.56e-46	sp|Q9US10|YK68_SCHPO Uncharacterized membrane protein C6F6.13c OS=Schizosaccharomyces pombe (strain 972 / ATCC 24843) GN=SPAC607.08c PE=3 SV=1 1.12e-43	GO:0003674, molecular_function;GO:0003824, catalytic activity;GO:0006810, transport;GO:0008150, biological_process;GO:0016192, vesicle-mediated transport;GO:0016298, lipase activity;GO:0016787, hydrolase activity;GO:0016788, hydrolase activity, acting on ester bonds;GO:0051179, localization;GO:0051234, establishment of localization	CAG5128179.1 unnamed protein product, partial [Candidula unifasciata] 4.71e-44	-
TRINITY_DN11523_c0_g2	-0.527339	-0.124796	1.75316	-1.0019	-1.25067	-1.19634	1.86765	1.08004	-0.5998	1	-	-	-	-	-	-	-	-
TRINITY_DN11532_c0_g1	1.08772	1.34345	1.45945	-1.23198	-0.759985	-1.49182	0.893437	-0.312201	-0.988072	1	-	pfam00153, Mito_carr, Mitochondrial carrier protein. 1.91e-06	-	KOG0752, KOG0752, KOG0752, Mitochondrial solute carrier protein [Energy production and conversion]. 8.01e-10	sp|Q12251|YP011_YEAST Uncharacterized mitochondrial carrier YPR011C OS=Saccharomyces cerevisiae (strain ATCC 204508 / S288c) GN=YPR011C PE=1 SV=1 1.13e-14	GO:0000295, adenine nucleotide transmembrane transporter activity;GO:0003674, molecular_function;GO:0005215, transporter activity;GO:0005346, purine ribonucleotide transmembrane transporter activity;GO:0005575, cellular_component;GO:0005622, intracellular;GO:0005623, cell;GO:0005737, cytoplasm;GO:0005739, mitochondrion;GO:0005740, mitochondrial envelope;GO:0005743, mitochondrial inner membrane;GO…	XP_022804590.1 mitochondrial adenine nucleotide transporter ADNT1-like [Stylophora pistillata] >PFX16714.1 Mitochondrial adenine nucleotide transporter ADNT1 [Stylophora pistillata] 1.45e-42	-
TRINITY_DN11538_c0_g1	0.342959	0.422053	1.34222	-0.660876	-0.829374	-0.999481	1.34474	0.102853	-1.0651	1	cd00141, NT_POLXc, Nucleotidyltransferase (NT) domain of family X DNA Polymerases. X family polymerases fill in short gaps during DNA repair. They are relatively inaccurate enzymes and play roles in base excision repair, in non-homologous end joining (NHEJ) which acts mainly to repair damage due to ionizing radiation, and in V(D)J recombination. This family includes eukaryotic Pol beta, Pol lambd…	pfam14792, DNA_pol_B_palm, DNA polymerase beta palm. The catalytic region of DNA polymerase beta is split into three domains. An N-terminal fingers domain, a central palm domain and a C-terminal thumb domain. This entry represents the palm domain. 8.28e-13	K10981-ko03450 Non-homologous end-joining	KOG2534, KOG2534, KOG2534, DNA polymerase IV (family X) [Replication, recombination and repair]. 4.71e-36	sp|Q09693|DPO4_SCHPO DNA polymerase type-X family protein pol4 OS=Schizosaccharomyces pombe (strain 972 / ATCC 24843) GN=pol4 PE=3 SV=1 1.92e-39	GO:0000278, mitotic cell cycle;GO:0000726, non-recombinational repair;GO:0000731, DNA synthesis involved in DNA repair;GO:0003674, molecular_function;GO:0003824, catalytic activity;GO:0003887, DNA-directed DNA polymerase activity;GO:0003896, DNA primase activity;GO:0003899, DNA-directed 5'-3' RNA polymerase activity;GO:0006139, nucleobase-containing compound metabolic process;GO:0006259, DNA meta…	XP_033125579.1 DNA polymerase lambda-like isoform X1 [Anneissia japonica] >XP_033125580.1 DNA polymerase lambda-like isoform X2 [Anneissia japonica] 1.35e-41	-
TRINITY_DN11545_c0_g1	1.80483	1.72367	1.31816	-0.414644	-1.01205	-0.383794	-1.01205	-1.01205	-1.01205	1	-	-	-	-	-	-	-	-
TRINITY_DN11545_c1_g1	0.340749	0.482332	1.29516	-1.16646	-1.04651	-1.11507	1.05242	0.262068	-0.104696	1	-	-	-	KOG0828, KOG0828, KOG0828, Predicted E3 ubiquitin ligase [Posttranslational modification, protein turnover, chaperones]. 2.10e-31	sp|P36096|TUL1_YEAST Transmembrane E3 ubiquitin-protein ligase 1 OS=Saccharomyces cerevisiae (strain ATCC 204508 / S288c) GN=TUL1 PE=1 SV=1 4.92e-16	GO:0000139, Golgi membrane;GO:0000151, ubiquitin ligase complex;GO:0000209, protein polyubiquitination;GO:0000322, storage vacuole;GO:0000323, lytic vacuole;GO:0000324, fungal-type vacuole;GO:0003674, molecular_function;GO:0003824, catalytic activity;GO:0004842, ubiquitin-protein transferase activity;GO:0005488, binding;GO:0005575, cellular_component;GO:0005622, intracellular;GO:0005623, cell;GO:…	-	-
TRINITY_DN11550_c0_g1	0.705719	1.05947	1.23849	-1.71972	-0.263995	-1.35031	0.712227	-0.0174003	-0.364484	1	cd01420, MoaC_PE, MoaC family, prokaryotic and eukaryotic. Members of this family are involved in molybdenum cofactor (Moco) biosynthesis, an essential cofactor of a diverse group of redox enzymes. MoaC, a small hexameric protein, converts, together with MoaA, a guanosine derivative to the precursor Z by inserting the carbon-8 of the purine between the 2' and 3' ribose carbon atoms, which is the …	pfam01967, MoaC, MoaC family. Members of this family are involved in molybdenum cofactor biosynthesis. However their molecular function is not known. 9.41e-36	K03639-ko00790 Folate biosynthesis;ko04122 Sulfur relay system	KOG2876, KOG2876, KOG2876, Molybdenum cofactor biosynthesis pathway protein [Coenzyme transport and metabolism]. 1.82e-109	sp|Q5RKZ7|MOCS1_MOUSE Molybdenum cofactor biosynthesis protein 1 OS=Mus musculus GN=Mocs1 PE=1 SV=2 1.10e-23	-	XP_046340346.2 molybdenum cofactor biosynthesis protein 1-like isoform X2 [Haliotis rufescens] 3.06e-130	-
TRINITY_DN11615_c0_g1	1.22022	0.940447	1.64893	-0.442561	-2.13523	-1.27601	1.43159	0.0795823	-1.46697	1	-	-	-	-	-	-	-	-
TRINITY_DN11643_c1_g1	0.894129	1.3135	1.26379	0.362025	-0.76669	-0.76669	-0.76669	-0.76669	-0.76669	1	-	-	-	-	-	-	-	-
TRINITY_DN11674_c0_g1	1.12513	1.43344	1.76175	-1.25248	-0.793034	-1.20737	0.323947	-0.373133	-1.01825	1	cd18580, ABC_6TM_ABCC_D2, Six-transmembrane helical domain 2 (TMD2) of the ABC transporters, subfamily C. This group represents the six-transmembrane domain 2 (TMD2) of the ABC transporters that belong to the ABCC subfamily, such as the sulphonylurea receptors SUR1/2 (ABCC8), the cystic fibrosis transmembrane conductance regulator (CFTR, ABCC7), Multidrug-Resistance associated Proteins (MRP1-9), …	pfam00005, ABC_tran, ABC transporter. ABC transporters for a large family of proteins responsible for translocation of a variety of compounds across biological membranes. ABC transporters are the largest family of proteins in many completely sequenced bacteria. ABC transporters are composed of two copies of this domain and two copies of a transmembrane domain pfam00664. These four domains may bel…	-	KOG0054, KOG0054, KOG0054, Multidrug resistance-associated protein/mitoxantrone resistance protein, ABC superfamily [Secondary metabolites biosynthesis, transport and catabolism]. 6.46e-08	sp|Q54U44|ABCCC_DICDI ABC transporter C family member 12 OS=Dictyostelium discoideum GN=abcC12 PE=3 SV=1 9.58e-09	-	NXC87907.1 MRP1 protein [Cercotrichas coryphoeus] 3.25e-129	-
TRINITY_DN11682_c0_g1	0.648485	0.509736	1.72249	-1.07196	-0.658346	-1.17052	1.46647	-0.00109249	-1.44526	1	cd05652, M20_ArgE_DapE-like_fungal, M20 Peptidases with similarity to acetylornithine deacetylases and succinyl-diaminopimelate desuccinylases. Peptidase M20 family, uncharacterized protein subfamily with similarity to acetylornithine deacetylase/succinyl-diaminopimelate desuccinylase (ArgE/DapE) subfamily. ArgE/DapE enzymes catalyze analogous reactions and share a common activator, the metal ion…	pfam01008, IF-2B, Initiation factor 2 subunit family. This family includes initiation factor 2B alpha, beta and delta subunits from eukaryotes, initiation factor 2B subunits 1 and 2 from archaebacteria and some proteins of unknown function from prokaryotes. Initiation factor 2 binds to Met-tRNA, GTP and the small ribosomal subunit. Members of this family have also been characterized as 5-methylth…	K01438-ko01210 2-Oxocarboxylic acid metabolism;ko00220 Arginine biosynthesis;ko01230 Biosynthesis of amino acids	KOG1468, KOG1468, KOG1468, Predicted translation initiation factor related to eIF-2B alpha/beta/delta subunits (CIG2/IDI2) [Translation, ribosomal structure and biogenesis]. 9.45e-109	sp|Q2GM68|MTNA_CHAGB Methylthioribose-1-phosphate isomerase OS=Chaetomium globosum (strain ATCC 6205 / CBS 148.51 / DSM 1962 / NBRC 6347 / NRRL 1970) GN=MRI1 PE=3 SV=1 0.0	-	XP_041616422.1 methylthioribose-1-phosphate isomerase [Vulpes lagopus] 3.30e-105	-
TRINITY_DN11698_c0_g1	1.15123	1.50709	0.987025	-0.439245	-1.1279	-0.212481	-0.509366	-0.642776	-0.713574	1	cd08948, 5beta-POR_like_SDR_a, progesterone 5-beta-reductase-like proteins (5beta-POR), atypical (a) SDRs. 5beta-POR catalyzes the reduction of progesterone to 5beta-pregnane-3,20-dione in Digitalis plants. This subgroup of atypical-extended SDRs, shares the structure of an extended SDR, but has a different glycine-rich nucleotide binding motif (GXXGXXG) and lacks the YXXXK active site motif of c…	-	-	-	sp|O74913|YJ72_SCHPO Uncharacterized protein C757.02c OS=Schizosaccharomyces pombe (strain 972 / ATCC 24843) GN=SPCC757.02c PE=4 SV=1 2.51e-35	-	KAG4074276.1 hypothetical protein HA402_008685 [Bradysia odoriphaga] 8.78e-154	-
TRINITY_DN11701_c0_g1	0.651427	0.69459	1.69568	-0.891795	-0.93284	-1.55391	1.11518	-0.367266	-0.411064	1	-	pfam10247, Romo1, Reactive mitochondrial oxygen species modulator 1. This is a family of small, approximately 100 amino acid, proteins found from yeasts to humans. The majority of endogenous reactive oxygen species (ROS) in cells are produced by the mitochondrial respiratory chain. An increase or imbalance in ROS alters the intracellular redox homeostasis, triggers DNA damage, and may contribute …	-	KOG4096, KOG4096, KOG4096, Uncharacterized conserved protein [Function unknown]. 4.29e-07	sp|Q02889|MGR2_YEAST Protein MGR2 OS=Saccharomyces cerevisiae (strain ATCC 204508 / S288c) GN=MGR2 PE=1 SV=1 1.48e-15	GO:0005575, cellular_component;GO:0005622, intracellular;GO:0005623, cell;GO:0005737, cytoplasm;GO:0005739, mitochondrion;GO:0005740, mitochondrial envelope;GO:0005743, mitochondrial inner membrane;GO:0005744, mitochondrial inner membrane presequence translocase complex;GO:0006605, protein targeting;GO:0006626, protein targeting to mitochondrion;GO:0006810, transport;GO:0006839, mitochondrial tra…	KAJ3028686.1 subunit of TIM23 translocase complex [Siphonaria sp. JEL0065] 8.98e-10	-
TRINITY_DN11708_c0_g1	0.837846	0.821516	0.687759	-0.533115	-0.967664	0.0554274	0.244828	-0.293593	-0.853005	1	-	pfam17652, Glyco_hydro81C, Glycosyl hydrolase family 81 C-terminal domain. Family of eukaryotic beta-1,3-glucanases. Within the Aspergillus fumigatus protein, two perfectly conserved Glu residues (E550 or E554) have been proposed as putative nucleophiles of the active site of the Engl1 endoglucanase, while the proton donor would be D475. The endo-beta-1,3-glucanase activity is essential for effic…	-	KOG2254, KOG2254, KOG2254, Predicted endo-1,3-beta-glucanase [Carbohydrate transport and metabolism]. 3.09e-147	sp|D4AZ24|ENG1_ARTBC Probable endo-1,3(4)-beta-glucanase ARB_01444 OS=Arthroderma benhamiae (strain ATCC MYA-4681 / CBS 112371) GN=ARB_01444 PE=1 SV=1 0.0	GO:0000003, reproduction;GO:0000272, polysaccharide catabolic process;GO:0000746, conjugation;GO:0000747, conjugation with cellular fusion;GO:0000920, cell separation after cytokinesis;GO:0000935, division septum;GO:0000936, primary cell septum;GO:0001871, pattern binding;GO:0003006, developmental process involved in reproduction;GO:0003674, molecular_function;GO:0003824, catalytic activity;GO:00…	CAF3873986.1 unnamed protein product [Rotaria sordida] 5.42e-75	-
TRINITY_DN11747_c0_g1	0.120831	0.588892	1.35448	-1.29584	-1.27982	-1.31124	1.53798	0.658885	-0.374172	1	-	-	-	-	-	-	-	-
TRINITY_DN11749_c0_g1	0.792225	0.895532	1.27367	-1.09283	-0.780027	-0.434689	0.791757	0.154893	-1.60053	1	-	pfam12859, ANAPC1, Anaphase-promoting complex subunit 1. Apc1 is the largest of the subunits of the anaphase-promoting complex or cyclosome. The anaphase-promoting complex is a multiprotein subunit E3 ubiquitin ligase complex that controls segregation of chromosomes and exit from mitosis in eukaryotes. Infection of human fibroblasts with human cytomegalovirus (HCMV) leads to cell cycle dysregulat…	K03348-ko04110 Cell cycle;ko04114 Oocyte meiosis;ko04914 Progesterone-mediated oocyte maturation;ko04120 Ubiquitin mediated proteolysis;ko04111 Cell cycle - yeast;ko04113 Meiosis - yeast	KOG1858, KOG1858, KOG1858, Anaphase-promoting complex (APC), subunit 1 (meiotic check point regulator/Tsg24) [Cell cycle control, cell division, chromosome partitioning, Posttranslational modification, protein turnover, chaperones]. 4.49e-140	sp|P24686|BIME_EMENI Negative regulator of mitosis OS=Emericella nidulans (strain FGSC A4 / ATCC 38163 / CBS 112.46 / NRRL 194 / M139) GN=bimE PE=2 SV=2 0.0	GO:0000151, ubiquitin ligase complex;GO:0000152, nuclear ubiquitin ligase complex;GO:0000228, nuclear chromosome;GO:0000278, mitotic cell cycle;GO:0000280, nuclear division;GO:0000775, chromosome, centromeric region;GO:0000785, chromatin;GO:0000790, nuclear chromatin;GO:0000792, heterochromatin;GO:0003674, molecular_function;GO:0005488, binding;GO:0005575, cellular_component;GO:0005622, intracell…	KAJ4431684.1 hypothetical protein ANN_20286 [Periplaneta americana] 5.34e-120	-
TRINITY_DN11754_c0_g1	0.532609	0.790947	1.36605	-0.556865	-0.465689	-0.953884	0.663292	-0.283929	-1.09253	1	-	pfam13520, AA_permease_2, Amino acid permease. 5.57e-15	-	KOG1289, KOG1289, KOG1289, Amino acid transporters [Amino acid transport and metabolism]. 1.66e-85	sp|O59942|AAP2_NEUCR Amino-acid permease 2 OS=Neurospora crassa (strain ATCC 24698 / 74-OR23-1A / CBS 708.71 / DSM 1257 / FGSC 987) GN=aap-2 PE=2 SV=2 1.46e-178	GO:0003333, amino acid transmembrane transport;GO:0003674, molecular_function;GO:0005215, transporter activity;GO:0005342, organic acid transmembrane transporter activity;GO:0005575, cellular_component;GO:0005622, intracellular;GO:0005623, cell;GO:0005737, cytoplasm;GO:0005783, endoplasmic reticulum;GO:0005794, Golgi apparatus;GO:0005886, plasma membrane;GO:0005887, integral component of plasma m…	CAF3532614.1 unnamed protein product [Rotaria sp. Silwood1] 3.34e-190	-
TRINITY_DN11757_c0_g1	0.410045	0.805364	1.40673	-1.50718	-0.378857	-1.2132	1.3634	0.258728	-1.14504	1	-	pfam00155, Aminotran_1_2, Aminotransferase class I and II. 6.51e-33	K14455-ko01210 2-Oxocarboxylic acid metabolism;ko04975 Fat digestion and absorption;ko00330 Arginine and proline metabolism;ko00950 Isoquinoline alkaloid biosynthesis;ko00360 Phenylalanine metabolism;ko00400 Phenylalanine, tyrosine and tryptophan biosynthesis;ko00220 Arginine biosynthesis;ko00710 Carbon fixation in photosynthetic organisms;ko00250 Alanine, aspartate and glutamate metabolism;ko003…	KOG1411, KOG1411, KOG1411, Aspartate aminotransferase/Glutamic oxaloacetic transaminase AAT1/GOT2 [Amino acid transport and metabolism]. 7.63e-170	sp|P12345|AATM_RABIT Aspartate aminotransferase, mitochondrial OS=Oryctolagus cuniculus GN=GOT2 PE=1 SV=2 4.28e-171	GO:0000096, sulfur amino acid metabolic process;GO:0001300, chronological cell aging;GO:0001302, replicative cell aging;GO:0003674, molecular_function;GO:0003824, catalytic activity;GO:0004069, L-aspartate:2-oxoglutarate aminotransferase activity;GO:0005575, cellular_component;GO:0005622, intracellular;GO:0005623, cell;GO:0005737, cytoplasm;GO:0005739, mitochondrion;GO:0005759, mitochondrial matr…	AQT27094.1 putative aspartate transaminase, partial [Nilaparvata lugens] 3.07e-195	PREDICTED: Diachasma alloeum aspartate aminotransferase, mitochondrial (LOC107039195), mRNA 2.48e-24
TRINITY_DN11769_c0_g2	0.47409	0.816173	1.45555	-1.16653	-0.935633	-1.33347	1.61626	0.0368246	-0.963263	1	cd21176, LPMO_auxiliary-like, fungal lytic polysaccharide monooxygenase (LPMO) auxiliary activity family protein. Proteins in this fungal family of copper-binding proteins may not function as lytic polysaccharide monooxygenases (LPMOs) or in specific binding of chitin and/or cellulose. A family member found in the ectomycorrhizal fungus Laccaria bicolor has been found to be located at the interfa…	-	-	-	sp|Q4WCX9|YA280_ASPFU Uncharacterized protein AFUA_6G02800 OS=Neosartorya fumigata (strain ATCC MYA-4609 / Af293 / CBS 101355 / FGSC A1100) GN=AFUA_6G02800 PE=1 SV=1 2.74e-09	-	-	-
TRINITY_DN11789_c0_g1	1.07988	1.33569	1.04886	0.0297723	-1.14209	-0.865956	-0.186617	-0.548503	-0.75104	1	-	pfam07859, Abhydrolase_3, alpha/beta hydrolase fold. This catalytic domain is found in a very wide range of enzymes. 1.06e-06	-	KOG4388, KOG4388, KOG4388, Hormone-sensitive lipase HSL [Lipid transport and metabolism]. 2.50e-07	sp|Q68J42|LIPS_PIG Hormone-sensitive lipase OS=Sus scrofa GN=LIPE PE=2 SV=1 2.38e-17	-	KAJ3014398.1 hypothetical protein HDU68_000298 [Siphonaria sp. JEL0065] 2.68e-82	-
TRINITY_DN11797_c0_g1	1.63123	1.39676	1.41355	-0.435388	-0.8609	-0.714045	-0.720937	-0.781427	-0.928844	1	-	pfam04928, PAP_central, Poly(A) polymerase central domain. The central domain of Poly(A) polymerase shares structural similarity with the allosteric activity domain of ribonucleotide reductase R1, which comprises a four-helix bundle and a three-stranded mixed beta- sheet. Even though the two enzymes bind ATP, the ATP-recognition motifs are different. 3.01e-22	-	KOG2245, KOG2245, KOG2245, Poly(A) polymerase and related nucleotidyltransferases [RNA processing and modification]. 7.54e-24	sp|Q9LMT2|PAPS1_ARATH Nuclear poly(A) polymerase 1 OS=Arabidopsis thaliana GN=PAPS1 PE=1 SV=1 1.20e-24	-	XP_034384082.1 poly(A) polymerase type 3-like [Cyclopterus lumpus] 1.79e-21	-
TRINITY_DN11823_c0_g1	0.87341	0.618567	1.10893	-0.599044	-1.58939	-0.849759	-0.115247	0.115772	0.436763	1	-	-	-	-	-	-	-	-
TRINITY_DN11832_c0_g1	0.562011	0.653509	1.57146	-0.423494	-0.964891	-1.24744	0.823077	-0.287534	-0.686694	1	cd18090, Arginine_MT_Sfm1, SAM-dependent arginine methyltransferase related to yeast Sfm1. Arginine methyltransferase Sfm1 methylates R146 of 40S ribosomal protein S3 (Rps3), which contacts 18S RNA. Sfm1 is part of the SPOUT (SpoU-TrmD) methyltransferase (MTase) superfamily, a large class of S-adenosyl-L-methionine (AdoMet or SAM)-dependent mainly RNA MTases which are structurally characterized b…	pfam04252, RNA_Me_trans, Predicted SAM-dependent RNA methyltransferase. This family of proteins are predicted to be alpha/beta-knot SAM-dependent RNA methyltransferases. 1.18e-76	-	-	sp|Q12314|SFM1_YEAST Protein arginine N-methyltransferase SFM1 OS=Saccharomyces cerevisiae (strain ATCC 204508 / S288c) GN=SFM1 PE=1 SV=1 1.96e-54	GO:0003674, molecular_function;GO:0003824, catalytic activity;GO:0006464, cellular protein modification process;GO:0006479, protein methylation;GO:0006807, nitrogen compound metabolic process;GO:0008150, biological_process;GO:0008152, metabolic process;GO:0008168, methyltransferase activity;GO:0008170, N-methyltransferase activity;GO:0008213, protein alkylation;GO:0008276, protein methyltransfera…	KAJ3032162.1 hypothetical protein HDU68_000001 [Siphonaria sp. JEL0065] 2.77e-43	-
TRINITY_DN11833_c0_g1	1.28537	1.0904	1.10061	0.0717634	-0.34233	-0.451998	-0.47133	-0.986312	-1.29618	1	cd05016, SIS_PGI_2, Phosphoglucose isomerase (PGI) contains two SIS (Sugar ISomerase) domains. This classification is based on the alignment of the second SIS domain. PGI is a multifunctional enzyme which as an intracellular dimer catalyzes the reversible isomerization of glucose 6-phosphate to fructose 6-phosphate. As an extracellular protein, PGI also has functions equivalent to neuroleukin (NL…	pfam00342, PGI, Phosphoglucose isomerase. Phosphoglucose isomerase catalyzes the interconversion of glucose-6-phosphate and fructose-6-phosphate. 0.0	K01810-ko00030 Pentose phosphate pathway;ko00500 Starch and sucrose metabolism;ko00520 Amino sugar and nucleotide sugar metabolism;ko00010 Glycolysis / Gluconeogenesis;ko01200 Carbon metabolism	KOG2446, KOG2446, KOG2446, Glucose-6-phosphate isomerase [Carbohydrate transport and metabolism]. 0.0	sp|Q7S986|G6PI_NEUCR Glucose-6-phosphate isomerase OS=Neurospora crassa (strain ATCC 24698 / 74-OR23-1A / CBS 708.71 / DSM 1257 / FGSC 987) GN=pgi-1 PE=3 SV=1 0.0	GO:0003674, molecular_function;GO:0003824, catalytic activity;GO:0004347, glucose-6-phosphate isomerase activity;GO:0005575, cellular_component;GO:0005576, extracellular region;GO:0005622, intracellular;GO:0005623, cell;GO:0005737, cytoplasm;GO:0005739, mitochondrion;GO:0005829, cytosol;GO:0005886, plasma membrane;GO:0005975, carbohydrate metabolic process;GO:0005996, monosaccharide metabolic pro…	AUX15092.1 glucose-6-phosphate isomerase [Sogatella furcifera] 0.0	PREDICTED: Ailuropoda melanoleuca glucose-6-phosphate isomerase (GPI), mRNA 1.01e-11
TRINITY_DN11841_c0_g1	0.462757	0.924207	1.32738	-0.878527	-0.62382	-0.869409	0.787858	0.122044	-1.25249	1	cd01428, ADK, Adenylate kinase (ADK) catalyzes the reversible phosphoryl transfer from adenosine triphosphates (ATP) to adenosine monophosphates (AMP) and to yield adenosine diphosphates (ADP). This enzyme is required for the biosynthesis of ADP and is essential for homeostasis of adenosine phosphates. 8.59e-47	pfam00406, ADK, Adenylate kinase. 2.13e-61	-	KOG3078, KOG3078, KOG3078, Adenylate kinase [Nucleotide transport and metabolism]. 8.13e-52	sp|Q9HE76|KAD2_NEUCR Adenylate kinase OS=Neurospora crassa (strain ATCC 24698 / 74-OR23-1A / CBS 708.71 / DSM 1257 / FGSC 987) GN=adk-1 PE=1 SV=2 2.54e-08	-	KAJ3022810.1 adenylate kinase [Siphonaria sp. JEL0065] 4.75e-78	-
TRINITY_DN11845_c0_g1	1.47322	1.92073	0.712511	-0.262399	-0.825197	-1.04906	-0.822893	-0.466521	-0.680387	1	-	pfam05057, DUF676, Putative serine esterase (DUF676). This family of proteins are probably serine esterase type enzymes with an alpha/beta hydrolase fold. 1.27e-14	-	KOG4372, KOG4372, KOG4372, Predicted alpha/beta hydrolase [General function prediction only]. 1.18e-22	sp|Q04093|YD444_YEAST Putative lipase YDR444W OS=Saccharomyces cerevisiae (strain ATCC 204508 / S288c) GN=YDR444W PE=1 SV=1 2.75e-13	GO:0003674, molecular_function;GO:0003824, catalytic activity;GO:0005575, cellular_component;GO:0005622, intracellular;GO:0005623, cell;GO:0005634, nucleus;GO:0005737, cytoplasm;GO:0005811, lipid droplet;GO:0006629, lipid metabolic process;GO:0008150, biological_process;GO:0008152, metabolic process;GO:0009056, catabolic process;GO:0009987, cellular process;GO:0016042, lipid catabolic process;GO:…	-	-
TRINITY_DN11997_c0_g1	1.10666	1.36502	2.59777	-0.913472	-2.1675	-1.4465	0.6436	-0.380154	-0.805425	1	cd11010, S1-P1_nuclease, S1/P1 nucleases and related enzymes. This family summarizes both S1 and P1 nucleases (EC:3.1.30.1) which cleave RNA and single stranded DNA with no base specificity. S1 nuclease is more active on DNA than RNA. Its reaction products are oligonucleotides or single nucleotides with 5' phosphoryl groups. Although its primary substrate is single-stranded, it may also introduce…	pfam02265, S1-P1_nuclease, S1/P1 Nuclease. This family contains both S1 and P1 nucleases (EC:3.1.30.1) which cleave RNA and single stranded DNA with no base specificity. 3.89e-07	-	KOG0029, KOG0029, KOG0029, Amine oxidase [Secondary metabolites biosynthesis, transport and catabolism]. 1.22e-07	sp|P46882|AOFN_ASPNG Monoamine oxidase N OS=Aspergillus niger GN=maoN PE=1 SV=1 1.64e-176	-	CAF0953197.1 unnamed protein product [Adineta ricciae] 8.07e-36	-
TRINITY_DN12015_c0_g1	0.367118	0.253647	1.18656	-0.641493	-1.11035	-1.10233	1.29871	0.0292771	-0.281138	1	cd01437, parp_like, Poly(ADP-ribose) polymerase (parp) catalytic domain catalyses the covalent attachment of ADP-ribose units from NAD+ to itself and to a limited number of other DNA binding proteins, which decreases their affinity for DNA. Poly(ADP-ribose) polymerase is a regulatory component induced by DNA damage. The carboxyl-terminal region is the most highly conserved region of the protein. …	pfam00644, PARP, Poly(ADP-ribose) polymerase catalytic domain. Poly(ADP-ribose) polymerase catalyzes the covalent attachment of ADP-ribose units from NAD+ to itself and to a limited number of other DNA binding proteins, which decreases their affinity for DNA. Poly(ADP-ribose) polymerase is a regulatory component induced by DNA damage. The carboxyl-terminal region is the most highly conserved regi…	K10798-ko04212 Longevity regulating pathway - worm;ko04210 Apoptosis;ko03410 Base excision repair;ko04214 Apoptosis - fly	KOG1037, KOG1037, KOG1037, NAD+ ADP-ribosyltransferase Parp, required for poly-ADP ribosylation of nuclear proteins [Transcription, Replication, recombination and repair, Posttranslational modification, protein turnover, chaperones]. 1.41e-53	sp|O50017|PARP2_MAIZE Poly [ADP-ribose] polymerase 2 OS=Zea mays GN=PARP2 PE=2 SV=1 1.13e-94	-	KAJ3017754.1 Poly [ADP-ribose] polymerase 2 [Siphonaria sp. JEL0065] 3.11e-93	-
TRINITY_DN12022_c0_g1	0.0602874	0.0697412	1.60977	-1.20261	-0.403571	-1.26801	1.07122	0.304182	-0.241007	1	cd00685, Trans_IPPS_HT, Trans-Isoprenyl Diphosphate Synthases, head-to-tail. These trans-Isoprenyl Diphosphate Synthases (Trans_IPPS) catalyze head-to-tail (HT) (1'-4) condensation reactions. This CD includes all-trans (E)-isoprenyl diphosphate synthases which synthesize various chain length (C10, C15, C20, C25, C30, C35, C40, C45, and C50) linear isoprenyl diphosphates from precursors, isopenten…	pfam00348, polyprenyl_synt, Polyprenyl synthetase. 1.44e-29	-	KOG0711, KOG0711, KOG0711, Polyprenyl synthetase [Coenzyme transport and metabolism]. 1.26e-91	sp|Q92235|FPPS_GIBFU Farnesyl pyrophosphate synthase OS=Gibberella fujikuroi GN=FPPS PE=3 SV=1 1.11e-152	-	XP_038140103.1 farnesyl pyrophosphate synthase isoform X2 [Cyprinodon tularosa] 2.54e-95	-
TRINITY_DN12028_c0_g1	0.434932	0.675029	1.14056	-0.758885	-0.543844	-0.861651	0.732368	0.0988109	-0.917323	1	cd17964, DEADc_MSS116, DEAD-box helicase domain of DEAD-box helicase Mss116. Mss116 is an RNA chaperone important for mitochondrial group I and II intron splicing, translational activation, and RNA end processing. Mss116 is a member of the DEAD-box helicases, a diverse family of proteins involved in ATP-dependent RNA unwinding, needed in a variety of cellular processes including splicing, ribosom…	pfam00270, DEAD, DEAD/DEAH box helicase. Members of this family include the DEAD and DEAH box helicases. Helicases are involved in unwinding nucleic acids. The DEAD box helicases are involved in various aspects of RNA metabolism, including nuclear transcription, pre mRNA splicing, ribosome biogenesis, nucleocytoplasmic transport, translation, RNA decay and organellar gene expression. 3.40e-27	-	KOG0342, KOG0342, KOG0342, ATP-dependent RNA helicase pitchoune [RNA processing and modification]. 4.83e-83	sp|Q0UG00|MS116_PHANO ATP-dependent RNA helicase MSS116, mitochondrial OS=Phaeosphaeria nodorum (strain SN15 / ATCC MYA-4574 / FGSC 10173) GN=MSS116 PE=3 SV=1 6.90e-98	GO:0000166, nucleotide binding;GO:0000959, mitochondrial RNA metabolic process;GO:0000963, mitochondrial RNA processing;GO:0003674, molecular_function;GO:0003724, RNA helicase activity;GO:0003824, catalytic activity;GO:0004004, ATP-dependent RNA helicase activity;GO:0004386, helicase activity;GO:0005488, binding;GO:0005524, ATP binding;GO:0005575, cellular_component;GO:0005622, intracellular;GO:0…	KAJ3021487.1 hypothetical protein HDU68_009604 [Siphonaria sp. JEL0065] 2.03e-99	-
TRINITY_DN12081_c0_g1	0.969027	1.41739	1.07819	0.184562	-1.79092	-1.25996	0.480837	-0.484049	-0.595084	1	cd08201, plant_peroxidase_like_1, Uncharacterized family of plant peroxidase-like proteins. This is a subgroup of heme-dependent peroxidases similar to plant peroxidases. Along with animal peroxidases, these enzymes belong to a group of peroxidases containing a heme prosthetic group (ferriprotoporphyrin IX) which catalyzes a multistep oxidative reaction involving hydrogen peroxide as the electron…	-	-	-	sp|D4AUF4|WSCD2_ARTBC WSC domain-containing protein ARB_07870 OS=Arthroderma benhamiae (strain ATCC MYA-4681 / CBS 112371) GN=ARB_07870 PE=1 SV=1 3.39e-36	-	-	-
TRINITY_DN12088_c0_g1	1.18395	1.17781	0.650093	-0.163074	-0.830586	-0.611632	-0.564125	-0.411877	-0.430567	1	-	-	-	-	-	-	-	-
TRINITY_DN12112_c0_g1	0.861141	0.880922	2.78729	-1.13603	-1.29558	-1.21755	0.878606	-0.238078	-1.52071	1	-	pfam03171, 2OG-FeII_Oxy, 2OG-Fe(II) oxygenase superfamily. This family contains members of the 2-oxoglutarate (2OG) and Fe(II)-dependent oxygenase superfamily. This family includes the C-terminal of prolyl 4-hydroxylase alpha subunit. The holoenzyme has the activity EC:1.14.11.2 catalyzing the reaction: Procollagen L-proline + 2-oxoglutarate + O2 <=> procollagen trans- 4-hydroxy-L-proline + succi…	-	KOG0143, KOG0143, KOG0143, Iron/ascorbate family oxidoreductases [Secondary metabolites biosynthesis, transport and catabolism, General function prediction only]. 4.43e-44	sp|Q54RA4|Y3291_DICDI Probable iron/ascorbate oxidoreductase DDB_G0283291 OS=Dictyostelium discoideum GN=DDB_G0283291 PE=3 SV=1 2.14e-31	-	CAF1035011.1 unnamed protein product [Didymodactylos carnosus] >CAF1070456.1 unnamed protein product [Didymodactylos carnosus] >CAF3803344.1 unnamed protein product [Didymodactylos carnosus] >CAF3837599.1 unnamed protein product [Didymodactylos carnosus] 9.23e-47	-
TRINITY_DN12159_c0_g1	0.0602397	0.811156	1.15987	-0.702026	-1.70789	-1.48239	1.17369	0.581945	0.105405	1	cd04188, DPG_synthase, DPG_synthase is involved in protein N-linked glycosylation. UDP-glucose:dolichyl-phosphate glucosyltransferase (DPG_synthase) is a transmembrane-bound enzyme of the endoplasmic reticulum involved in protein N-linked glycosylation. This enzyme catalyzes the transfer of glucose from UDP-glucose to dolichyl phosphate. 4.55e-50	pfam08491, SE, Squalene epoxidase. This domain is found in squalene epoxidase (SE) and related proteins which are found in taxonomically diverse groups of eukaryotes and also in bacteria. SE was first cloned from Saccharomyces cerevisiae where it was named ERG1. It contains a putative FAD binding site and is a key enzyme in the sterol biosynthetic pathway. Putative transmembrane regions are found…	K00511-ko00100 Steroid biosynthesis;ko00909 Sesquiterpenoid and triterpenoid biosynthesis	KOG1298, KOG1298, KOG1298, Squalene monooxygenase [Lipid transport and metabolism]. 7.13e-92	sp|Q92206|ERG1_CANAL Squalene monooxygenase OS=Candida albicans (strain SC5314 / ATCC MYA-2876) GN=ERG1 PE=3 SV=1 3.21e-99	GO:0003674, molecular_function;GO:0003824, catalytic activity;GO:0004497, monooxygenase activity;GO:0004506, squalene monooxygenase activity;GO:0005488, binding;GO:0005575, cellular_component;GO:0005622, intracellular;GO:0005623, cell;GO:0005737, cytoplasm;GO:0005783, endoplasmic reticulum;GO:0005789, endoplasmic reticulum membrane;GO:0005811, lipid droplet;GO:0005886, plasma membrane;GO:0006066,…	KAJ3021857.1 Squalene epoxidase [Siphonaria sp. JEL0065] 2.56e-105	-
TRINITY_DN12167_c0_g1	1.14632	0.549958	1.1514	-0.169854	-0.686974	-0.288071	-0.553518	-0.623242	-0.526025	1	-	-	-	-	-	-	-	-
TRINITY_DN12189_c0_g1	0.947843	0.951861	1.83539	-0.899344	-2.15754	-0.99806	0.499101	-0.166508	-0.0127435	1	-	pfam11374, DUF3176, Protein of unknown function (DUF3176). This eukaryotic family of proteins has no known function. 5.85e-14	-	KOG4245, KOG4245, KOG4245, Predicted metal-dependent hydrolase of the TIM-barrel fold [General function prediction only]. 1.22e-25	sp|Q8R519|ACMSD_MOUSE 2-amino-3-carboxymuconate-6-semialdehyde decarboxylase OS=Mus musculus GN=Acmsd PE=1 SV=2 3.24e-24	-	KAJ3031031.1 hypothetical protein HDU68_006869 [Siphonaria sp. JEL0065] 3.23e-27	-
TRINITY_DN12207_c0_g1	1.11133	2.00638	1.74085	-0.661409	-0.92577	-1.01841	-0.0356747	-1.17413	-1.04317	1	-	pfam01425, Amidase, Amidase. 1.76e-26	K01426-ko00627 Aminobenzoate degradation;ko00643 Styrene degradation;ko00360 Phenylalanine metabolism;ko00380 Tryptophan metabolism;ko00330 Arginine and proline metabolism	KOG1211, KOG1211, KOG1211, Amidases [Translation, ribosomal structure and biogenesis]. 1.77e-25	sp|Q9URY4|YI01_SCHPO Putative amidase C869.01 OS=Schizosaccharomyces pombe (strain 972 / ATCC 24843) GN=SPAC869.01 PE=3 SV=1 2.67e-85	-	XP_034140866.1 putative amidase C869.01 [Drosophila guanche] >BAF95823.1 amidase homolog [Saccharomyces pastorianus] 6.16e-91	-
TRINITY_DN12214_c0_g1	0.545072	1.12864	1.65575	-0.878652	-1.76948	-1.24764	1.08494	0.0753086	-0.593939	1	-	-	-	-	sp|Q8EPF5|IF3_OCEIH Translation initiation factor IF-3 OS=Oceanobacillus iheyensis (strain DSM 14371 / JCM 11309 / KCTC 3954 / HTE831) GN=infC PE=3 SV=2 7.60e-07	-	-	-
TRINITY_DN12227_c0_g1	0.52258	1.30076	1.54944	-0.777274	-1.38168	-1.10883	0.547376	0.156826	-0.809189	1	cd00775, LysRS_core, Lys_tRNA synthetase (LysRS) class II core domain. Class II LysRS is a dimer which attaches a lysine to the 3' OH group of ribose of the appropriate tRNA. Its assignment to class II aaRS is based upon its structure and the presence of three characteristic sequence motifs in the core domain. It is found in eukaryotes as well as some prokaryotes and archaea. However, LysRS belon…	pfam00152, tRNA-synt_2, tRNA synthetases class II (D, K and N). 7.59e-40	K04567-ko00970 Aminoacyl-tRNA biosynthesis	KOG1885, KOG1885, KOG1885, Lysyl-tRNA synthetase (class II) [Translation, ribosomal structure and biogenesis]. 0.0	sp|Q9UUE6|SYKC_SCHPO Lysine--tRNA ligase, cytoplasmic OS=Schizosaccharomyces pombe (strain 972 / ATCC 24843) GN=krs1 PE=3 SV=1 0.0	GO:0002181, cytoplasmic translation;GO:0003674, molecular_function;GO:0003676, nucleic acid binding;GO:0003723, RNA binding;GO:0003729, mRNA binding;GO:0003824, catalytic activity;GO:0004812, aminoacyl-tRNA ligase activity;GO:0004824, lysine-tRNA ligase activity;GO:0005488, binding;GO:0005575, cellular_component;GO:0005622, intracellular;GO:0005623, cell;GO:0005737, cytoplasm;GO:0006082, organic …	KAJ3007247.1 Lysine--tRNA ligase [Siphonaria sp. JEL0065] 4.83e-199	PREDICTED: Branchiostoma belcheri lysine--tRNA ligase-like (LOC109473831), transcript variant X2, mRNA 4.86e-29
TRINITY_DN12232_c0_g1	0.210978	0.579738	1.0661	-0.546116	-0.786355	-0.844985	1.11579	-0.0465763	-0.74858	1	cd16926, HATPase_MutL-MLH-PMS-like, Histidine kinase-like ATPase domain of DNA mismatch repair proteins Escherichia coli MutL, human MutL homologs (MLH/ PMS), and related domains. This family includes the histidine kinase-like ATPase (HATPase) domains of Escherichia coli MutL, human MLH1 (mutL homolog 1), human PMS1 (PMS1 homolog 1, mismatch repair system component), human MLH3 (mutL homolog 3), …	pfam01119, DNA_mis_repair, DNA mismatch repair protein, C-terminal domain. This family represents the C-terminal domain of the mutL/hexB/PMS1 family. This domain has a ribosomal S5 domain 2-like fold. 3.26e-06	K10858-ko03460 Fanconi anemia pathway;ko03430 Mismatch repair	KOG1978, KOG1978, KOG1978, DNA mismatch repair protein - MLH2/PMS1/Pms2 family [Replication, recombination and repair]. 1.50e-62	sp|P54280|PMS1_SCHPO DNA mismatch repair protein pms1 OS=Schizosaccharomyces pombe (strain 972 / ATCC 24843) GN=pms1 PE=3 SV=1 7.04e-58	GO:0000003, reproduction;GO:0000166, nucleotide binding;GO:0000228, nuclear chromosome;GO:0000710, meiotic mismatch repair;GO:0003674, molecular_function;GO:0003676, nucleic acid binding;GO:0003677, DNA binding;GO:0003690, double-stranded DNA binding;GO:0003697, single-stranded DNA binding;GO:0003824, catalytic activity;GO:0005488, binding;GO:0005524, ATP binding;GO:0005575, cellular_component;GO…	XP_019640995.1 PREDICTED: mismatch repair endonuclease PMS2-like isoform X1 [Branchiostoma belcheri] >XP_019641003.1 PREDICTED: mismatch repair endonuclease PMS2-like isoform X1 [Branchiostoma belcheri] >XP_019641038.1 PREDICTED: mismatch repair endonuclease PMS2-like isoform X4 [Branchiostoma belcheri] 1.24e-145	-
TRINITY_DN12257_c0_g1	0.708761	1.05173	1.52141	-1.14613	0.257954	-1.19478	0.117322	-0.469513	-0.846748	1	cd19120, AKR_AKR3C2-3, Saccharomyces pombe NAD/NADP-dependent indole-3-acetaldehyde reductase, Candida parapsilosis NADPH-dependent conjugated polyketone reductase C2 (CPR), and similar proteins. Saccharomyces pombe NAD/NADP-dependent indole-3-acetaldehyde reductase (EC 1.1.1.190/EC 1.1.1.191) and Candida parapsilosis NADPH-dependent CPR (EC 1.1.1.358/EC 1.1.1.168) are founding members of aldo-ke…	pfam00248, Aldo_ket_red, Aldo/keto reductase family. This family includes a number of K+ ion channel beta chain regulatory domains - these are reported to have oxidoreductase activity. 9.91e-26	-	KOG1577, KOG1577, KOG1577, Aldo/keto reductase family proteins [General function prediction only]. 1.56e-46	sp|O13848|I3ACR_SCHPO NAD/NADP-dependent indole-3-acetaldehyde reductase OS=Schizosaccharomyces pombe (strain 972 / ATCC 24843) GN=SPAC19G12.09 PE=1 SV=1 3.59e-43	-	XP_039301044.1 LOW QUALITY PROTEIN: NADPH-dependent conjugated polyketone reductase C2-like [Nilaparvata lugens] 8.20e-81	-
TRINITY_DN12266_c0_g1	0.826463	0.199676	0.693844	-0.962909	-0.856549	-1.11659	1.15266	0.171165	-0.107759	1	-	-	-	-	-	-	-	-
TRINITY_DN12272_c0_g1	0.873176	0.968118	1.493	-0.330964	-1.53355	-0.786775	0.403754	-0.13389	-0.952866	1	cd08217, STKc_Nek2, Catalytic domain of the Serine/Threonine Kinase, Never In Mitosis gene A (NIMA)-related kinase 2. STKs catalyze the transfer of the gamma-phosphoryl group from ATP to serine/threonine residues on protein substrates. The Nek2 subfamily includes Aspergillus nidulans NIMA kinase, the founding member of the Nek family, which was identified in a screen for cell cycle mutants preven…	pfam07714, Pkinase_Tyr, Protein tyrosine kinase. 1.07e-11	-	KOG0591, KOG0591, KOG0591, NIMA (never in mitosis)-related G2-specific serine/threonine protein kinase [Cell cycle control, cell division, chromosome partitioning]. 9.35e-48	sp|P48479|NIM1_NEUCR G2-specific protein kinase nim-1 OS=Neurospora crassa (strain ATCC 24698 / 74-OR23-1A / CBS 708.71 / DSM 1257 / FGSC 987) GN=nim-1 PE=2 SV=2 6.50e-83	GO:0000226, microtubule cytoskeleton organization;GO:0000278, mitotic cell cycle;GO:0000280, nuclear division;GO:0000910, cytokinesis;GO:0003674, molecular_function;GO:0003824, catalytic activity;GO:0004672, protein kinase activity;GO:0004674, protein serine/threonine kinase activity;GO:0005575, cellular_component;GO:0005622, intracellular;GO:0005623, cell;GO:0005815, microtubule organizing cente…	XP_002731116.1 PREDICTED: serine/threonine-protein kinase Nek2-like [Saccoglossus kowalevskii] 3.40e-35	-
TRINITY_DN12273_c0_g1	1.07578	1.75519	1.52726	-0.68607	-0.841908	-0.952201	-0.326185	-0.634938	-0.91693	1	-	-	-	-	sp|A1DPF0|PLYC_NEOFI Probable pectate lyase C OS=Neosartorya fischeri (strain ATCC 1020 / DSM 3700 / FGSC A1164 / NRRL 181) GN=plyC PE=3 SV=1 8.11e-170	-	-	-
TRINITY_DN12281_c0_g1	0.628328	0.296254	1.59061	-1.20054	-1.14159	-1.12475	1.61832	0.0873503	-0.753975	1	-	pfam00324, AA_permease, Amino acid permease. 2.41e-67	-	KOG1286, KOG1286, KOG1286, Amino acid transporters [Amino acid transport and metabolism]. 1.90e-81	sp|P43548|AGP3_YEAST General amino acid permease AGP3 OS=Saccharomyces cerevisiae (strain ATCC 204508 / S288c) GN=AGP3 PE=1 SV=1 0.0	GO:0003333, amino acid transmembrane transport;GO:0003674, molecular_function;GO:0005215, transporter activity;GO:0005342, organic acid transmembrane transporter activity;GO:0005575, cellular_component;GO:0005622, intracellular;GO:0005623, cell;GO:0005737, cytoplasm;GO:0005783, endoplasmic reticulum;GO:0005886, plasma membrane;GO:0006810, transport;GO:0006811, ion transport;GO:0006812, cation tra…	CAF1141514.1 unnamed protein product [Adineta steineri] >CAF3997107.1 unnamed protein product [Adineta steineri] 2.67e-155	-
TRINITY_DN12292_c0_g1	0.568487	1.25427	1.68945	-1.06352	-1.39142	-0.917827	0.731838	-0.20039	-0.670888	1	-	pfam03663, Glyco_hydro_76, Glycosyl hydrolase family 76. Family of alpha-1,6-mannanases. 2.05e-20	-	-	sp|Q5ACZ2|DFG5_CANAL Mannan endo-1,6-alpha-mannosidase DFG5 OS=Candida albicans (strain SC5314 / ATCC MYA-2876) GN=DFG5 PE=1 SV=1 4.56e-16	-	ODM94048.1 Mannan endo-1,6-alpha-mannosidase DFG5 [Orchesella cincta] 1.79e-69	-
TRINITY_DN12294_c0_g1	0.522018	0.353999	1.2331	-0.781958	-1.1323	-0.976608	1.50803	0.293501	-1.01979	1	-	-	-	-	-	-	-	-
TRINITY_DN12296_c0_g1	1.96278	1.78171	1.9196	-0.516067	-1.46271	-0.971507	-0.374218	-1.28601	-1.05359	1	-	-	-	-	-	-	-	-
TRINITY_DN12327_c0_g1	2.0744	1.17009	1.26272	-0.146989	-1.81139	-0.885687	-0.465686	-0.886049	-0.311409	1	-	-	-	-	-	-	-	-
TRINITY_DN12327_c0_g2	2.28519	1.24317	1.11782	-0.244164	-1.15472	-0.382249	-0.875216	-0.746831	-1.24299	1	sd00045, ANK, ankyrin repeats. Ankyrin repeats are one of the most abundant repeat motifs, and generally function as scaffolds for protein-protein interactions in processes including cell cycle, transcriptional regulation, signal transduction, vesicular trafficking, and inflammatory response. Although predominantly found in eukaryotic proteins, they are also found in some bacterial and viral prot…	pfam12796, Ank_2, Ankyrin repeats (3 copies). 1.18e-10	-	KOG4177, KOG4177, KOG4177, Ankyrin [Cell wall/membrane/envelope biogenesis]. 9.19e-08	sp|Q5UPG5|YL093_MIMIV Putative ankyrin repeat protein L93 OS=Acanthamoeba polyphaga mimivirus GN=MIMI_L93 PE=3 SV=1 3.60e-09	-	KAF0023589.1 hypothetical protein F2P81_024219 [Scophthalmus maximus] 5.04e-09	-
TRINITY_DN12343_c0_g1	1.38609	1.94065	1.55906	-0.563123	-1.5271	-0.80619	-0.303779	-0.722039	-0.963571	1	sd00039, 7WD40, WD40 repeats in seven bladed beta propellers. The WD40 repeat is found in a number of eukaryotic proteins that cover a wide variety of functions including adaptor/regulatory modules in signal transduction, pre-mRNA processing, and cytoskeleton assembly. It typically contains a GH dipeptide 11-24 residues from its N-terminus and the WD dipeptide at its C-terminus and is 40 residues…	-	-	KOG0266, KOG0266, KOG0266, WD40 repeat-containing protein [General function prediction only]. 6.72e-06	sp|O60097|SPT8_SCHPO Transcription factor spt8 OS=Schizosaccharomyces pombe (strain 972 / ATCC 24843) GN=spt8 PE=3 SV=1 1.34e-44	GO:0000122, negative regulation of transcription by RNA polymerase II;GO:0000123, histone acetyltransferase complex;GO:0000124, SAGA complex;GO:0000228, nuclear chromosome;GO:0000785, chromatin;GO:0000790, nuclear chromatin;GO:0003674, molecular_function;GO:0003712, transcription cofactor activity;GO:0005488, binding;GO:0005515, protein binding;GO:0005575, cellular_component;GO:0005622, intracell…	KAJ3010877.1 Transcription factor spt8 [Siphonaria sp. JEL0065] 5.59e-30	-
TRINITY_DN12355_c0_g1	0.683703	0.270687	1.56151	-0.810633	-0.865652	-0.884178	0.659113	0.404076	-1.01862	1	-	-	-	-	-	-	-	-
TRINITY_DN12357_c0_g1	1.29136	2.02389	1.20568	-0.0480437	-1.01991	-1.00536	-1.1035	-0.768389	-0.575722	1	-	-	-	-	-	-	-	-
TRINITY_DN12362_c0_g1	0.519035	0.922926	1.76429	-0.602401	-1.50761	-1.4289	1.15486	0.0442222	-0.866411	1	-	pfam09424, YqeY, Yqey-like protein. The function of this domain found in the YqeY protein is uncertain. 3.41e-14	-	-	sp|B2WMX8|AIM41_PYRTR Altered inheritance of mitochondria protein 41, mitochondrial OS=Pyrenophora tritici-repentis (strain Pt-1C-BFP) GN=AIM41 PE=3 SV=1 1.86e-20	-	MCL4157335.1 hypothetical protein [Idotea baltica] 4.40e-10	-
TRINITY_DN12390_c0_g1	0.918065	1.16092	1.23426	0.0573597	-1.62418	-1.58833	0.0559604	-0.0985025	-0.115546	1	-	pfam00173, Cyt-b5, Cytochrome b5-like Heme/Steroid binding domain. This family includes heme binding domains from a diverse range of proteins. This family also includes proteins that bind to steroids. The family includes progesterone receptors. Many members of this subfamily are membrane anchored by an N-terminal transmembrane alpha helix. This family also includes a domain in some chitin synthas…	-	KOG0539, KOG0539, KOG0539, Sphingolipid fatty acid hydroxylase [Lipid transport and metabolism]. 8.21e-47	sp|Q03529|SCS7_YEAST Ceramide very long chain fatty acid hydroxylase SCS7 OS=Saccharomyces cerevisiae (strain ATCC 204508 / S288c) GN=SCS7 PE=1 SV=1 6.55e-115	GO:0000170, sphingosine hydroxylase activity;GO:0003674, molecular_function;GO:0003824, catalytic activity;GO:0005575, cellular_component;GO:0005622, intracellular;GO:0005623, cell;GO:0005737, cytoplasm;GO:0005783, endoplasmic reticulum;GO:0005789, endoplasmic reticulum membrane;GO:0006082, organic acid metabolic process;GO:0006629, lipid metabolic process;GO:0006631, fatty acid metabolic process…	KAJ3031813.1 fatty acid alpha-hydroxylase [Siphonaria sp. JEL0065] 2.40e-87	-
TRINITY_DN12407_c1_g1	1.93746	1.30269	0.840228	0.0844354	-0.653804	-0.60525	-0.629502	-1.31217	-0.964091	1	cd11058, CYP60B-like, cytochrome P450 family 60, subfamily B and similar cytochrome P450s. This family is composed of fungal cytochrome P450s including: Aspergillus nidulans cytochrome P450 60B (CYP60B), also called versicolorin B desaturase, which catalyzes the conversion of versicolorin B to versicolorin A during sterigmatocystin biosynthesis; Fusarium sporotrichioides cytochrome P450 65A1 (CYP…	pfam00067, p450, Cytochrome P450. Cytochrome P450s are haem-thiolate proteins involved in the oxidative degradation of various compounds. They are particularly well known for their role in the degradation of environmental toxins and mutagens. They can be divided into 4 classes, according to the method by which electrons from NAD(P)H are delivered to the catalytic site. Sequence conservation is re…	-	KOG0158, KOG0158, KOG0158, Cytochrome P450 CYP3/CYP5/CYP6/CYP9 subfamilies [Secondary metabolites biosynthesis, transport and catabolism]. 2.30e-32	sp|Q12609|STCF_EMENI Probable sterigmatocystin biosynthesis P450 monooxygenase stcF OS=Emericella nidulans (strain FGSC A4 / ATCC 38163 / CBS 112.46 / NRRL 194 / M139) GN=stcF PE=3 SV=3 4.84e-94	-	XP_037037647.1 benzoate 4-monooxygenase-like [Bradysia coprophila] 4.71e-37	-
TRINITY_DN12424_c0_g1	0.445588	0.649535	1.64223	-0.916267	-0.791018	-0.951681	0.400651	-0.0441063	-0.434932	1	cd07000, cupin_HGO_N, homogentisate 1,2-dioxygenase and related proteins, N-terminal cupin domain. This family includes homogentisate 1,2-dioxygenase (also known as homogentisate oxygenase, homogentisic acid oxidase, homogentisicase, HGO, HGD, HGDO, or HmgA; EC 1.13.11.5), which is involved in the metabolic degradation of phenylalanine and tyrosine. It catalyzes the crucial aromatic ring opening …	pfam04209, HgmA, homogentisate 1,2-dioxygenase. Homogentisate dioxygenase cleaves the aromatic ring during the metabolic degradation of Phe and Tyr. Homogentisate dioxygenase deficiency causes alkaptonuria. The structure of homogentisate dioxygenase shows that the enzyme forms a hexamer arrangement comprised of a dimer of trimers. The active site iron ion is coordinated near the interface between…	K00451-ko00643 Styrene degradation;ko00350 Tyrosine metabolism	KOG1417, KOG1417, KOG1417, Homogentisate 1,2-dioxygenase [Amino acid transport and metabolism]. 1.84e-145	sp|Q00667|HGD_EMENI Homogentisate 1,2-dioxygenase OS=Emericella nidulans (strain FGSC A4 / ATCC 38163 / CBS 112.46 / NRRL 194 / M139) GN=hmgA PE=2 SV=1 0.0	-	XP_041775233.1 homogentisate 1,2-dioxygenase [Anopheles merus] 4.12e-152	-
TRINITY_DN12450_c0_g1	0.695328	1.13387	2.27486	-0.477109	-1.89899	-1.19282	-0.143975	0.331345	-0.7225	1	-	pfam13489, Methyltransf_23, Methyltransferase domain. This family appears to be a methyltransferase domain. 3.35e-07	-	-	sp|A7XRZ1|TDIE_EMENI Probable methyltransferase tdiE OS=Emericella nidulans (strain FGSC A4 / ATCC 38163 / CBS 112.46 / NRRL 194 / M139) GN=tdiE PE=2 SV=1 1.78e-49	-	XP_039274961.1 LOW QUALITY PROTEIN: methyltransferase pytC-like [Nilaparvata lugens] 7.81e-38	-
TRINITY_DN12461_c0_g1	0.499283	0.6594	1.27579	-0.800837	-0.885441	-0.876622	0.894382	-0.0660106	-0.69995	1	cd11058, CYP60B-like, cytochrome P450 family 60, subfamily B and similar cytochrome P450s. This family is composed of fungal cytochrome P450s including: Aspergillus nidulans cytochrome P450 60B (CYP60B), also called versicolorin B desaturase, which catalyzes the conversion of versicolorin B to versicolorin A during sterigmatocystin biosynthesis; Fusarium sporotrichioides cytochrome P450 65A1 (CYP…	pfam00067, p450, Cytochrome P450. Cytochrome P450s are haem-thiolate proteins involved in the oxidative degradation of various compounds. They are particularly well known for their role in the degradation of environmental toxins and mutagens. They can be divided into 4 classes, according to the method by which electrons from NAD(P)H are delivered to the catalytic site. Sequence conservation is re…	-	KOG0158, KOG0158, KOG0158, Cytochrome P450 CYP3/CYP5/CYP6/CYP9 subfamilies [Secondary metabolites biosynthesis, transport and catabolism]. 7.18e-33	sp|Q7RWM9|SWF1_NEUCR Palmitoyltransferase SWF1 OS=Neurospora crassa (strain ATCC 24698 / 74-OR23-1A / CBS 708.71 / DSM 1257 / FGSC 987) GN=swf-1 PE=3 SV=1 1.71e-143	-	XP_037037647.1 benzoate 4-monooxygenase-like [Bradysia coprophila] 2.76e-38	-
TRINITY_DN12465_c0_g1	0.406415	1.33637	1.83026	-0.887131	-1.16898	-1.22586	0.754139	-0.190085	-0.855125	1	cd06179, MFS_TRI12_like, Fungal trichothecene efflux pump (TRI12) of the Major Facilitator Superfamily of transporters. This family includes Fusarium sporotrichioides trichothecene efflux pump (TRI12), which may play a role in F. sporotrichioides self-protection against trichothecenes. TRI12 belongs to the Major Facilitator Superfamily (MFS) of membrane transport proteins, which are thought to fu…	pfam06609, TRI12, Fungal trichothecene efflux pump (TRI12). This family consists of several fungal specific trichothecene efflux pump proteins. Many of the genes involved in trichothecene toxin biosynthesis in Fusarium sporotrichioides are present within a gene cluster.It has been suggested that TRI12 may play a role in F. sporotrichioides self-protection against trichothecenes. 5.59e-08	-	-	sp|B6HJU0|ROQT_PENRW Efflux pump roqT OS=Penicillium rubens (strain ATCC 28089 / DSM 1075 / NRRL 1951 / Wisconsin 54-1255) GN=roqT PE=1 SV=1 1.71e-94	-	KAJ3024382.1 hypothetical protein HDU68_008231 [Siphonaria sp. JEL0065] 4.21e-59	-
TRINITY_DN12481_c0_g1	0.366359	0.803653	1.89179	-1.29649	-1.02084	-0.900686	1.21078	0.228892	-1.28345	1	-	-	-	-	sp|Q9P7N6|YIO2_SCHPO TPR repeat-containing protein P27G11.02 OS=Schizosaccharomyces pombe (strain 972 / ATCC 24843) GN=SPAP27G11.02 PE=3 SV=1 9.64e-16	-	-	-
TRINITY_DN12500_c0_g3	0.876938	0.858534	1.50295	-0.463162	-1.68812	-0.832618	0.726328	-0.0951295	-0.885726	1	-	pfam08654, DASH_Dad2, DASH complex subunit Dad2. The DASH complex is a ~10 subunit microtubule-binding complex that is transferred to the kinetochore prior to mitosis. In Saccharomyces cerevisiae DASH forms both rings and spiral structures on microtubules in vitro. 1.55e-14	-	-	-	-	-	-
TRINITY_DN12538_c0_g1	1.2067	1.13349	1.33786	-0.534754	-1.51824	-1.17472	0.483937	-0.205246	-0.729022	1	-	-	-	-	-	-	-	-
TRINITY_DN12565_c0_g4	0.614466	1.08082	1.4319	-1.03895	-0.755187	-1.07438	0.68474	-0.15025	-0.793167	1	cd20071, SET_SMYD, SET domain (including SET domain and post-SET domain) found in SET and MYND domain-containing protein, and similar proteins. The family includes SET and MYND domain-containing proteins, SMYD1-SYMD5. SMYD1 (EC 2.1.1.43; also termed BOP) is a heart and muscle specific SET-MYND domain containing protein, which functions as a histone methyltransferase and regulates downstream gene …	-	-	KOG2084, KOG2084, KOG2084, Predicted histone tail methylase containing SET domain [Chromatin structure and dynamics]. 1.06e-06	sp|O74467|SET5_SCHPO SET domain-containing protein 5 OS=Schizosaccharomyces pombe (strain 972 / ATCC 24843) GN=set5 PE=1 SV=1 1.21e-19	GO:0000228, nuclear chromosome;GO:0000785, chromatin;GO:0000790, nuclear chromatin;GO:0003674, molecular_function;GO:0003824, catalytic activity;GO:0005575, cellular_component;GO:0005622, intracellular;GO:0005623, cell;GO:0005634, nucleus;GO:0005694, chromosome;GO:0005737, cytoplasm;GO:0006325, chromatin organization;GO:0006464, cellular protein modification process;GO:0006479, protein methylatio…	CAF1088325.1 unnamed protein product [Brachionus calyciflorus] 6.12e-12	-
TRINITY_DN12583_c0_g1	0.569239	0.792515	1.34354	-1.11186	-0.105229	-1.26384	0.709481	-0.357341	-0.576511	1	-	-	-	-	-	-	XP_033115066.1 major facilitator superfamily domain-containing protein 1-like isoform X2 [Anneissia japonica] 6.46e-07	-
TRINITY_DN12634_c0_g1	0.415429	0.62679	0.636416	-0.699002	-0.590466	-0.917875	0.41591	-0.272443	0.38524	1	-	pfam00734, CBM_1, Fungal cellulose binding domain. 2.77e-07	-	-	sp|Q7Z9M8|XG74_HYPJQ Xyloglucanase OS=Hypocrea jecorina (strain QM6a) GN=cel74a PE=1 SV=1 4.66e-09	-	-	-
TRINITY_DN12646_c0_g1	0.56662	0.425241	1.80801	-0.967021	-1.13336	-1.15454	1.32955	0.027699	-0.902212	1	-	-	-	-	-	-	CAF5026796.1 unnamed protein product, partial [Rotaria sp. Silwood1] 2.67e-07	-
TRINITY_DN12677_c0_g1	0.61229	0.409676	0.733746	-0.621047	-1.03191	-0.521769	0.547214	0.239174	-0.367379	1	cd01370, KISc_KIP3_like, Kinesin motor domain, KIP3-like subgroup. Kinesin motor domain, KIP3-like subgroup. The yeast kinesin KIP3 plays a role in positioning the mitotic spindle. This catalytic (head) domain has ATPase activity and belongs to the larger group of P-loop NTPases. Kinesins are microtubule-dependent molecular motors that play important roles in intracellular transport and in cell d…	pfam00225, Kinesin, Kinesin motor domain. 7.99e-90	-	KOG0242, KOG0242, KOG0242, Kinesin-like protein [Cytoskeleton]. 2.60e-95	sp|O59751|KLP6_SCHPO Kinesin-like protein 6 OS=Schizosaccharomyces pombe (strain 972 / ATCC 24843) GN=klp6 PE=1 SV=1 1.07e-160	GO:0000070, mitotic sister chromatid segregation;GO:0000132, establishment of mitotic spindle orientation;GO:0000226, microtubule cytoskeleton organization;GO:0000228, nuclear chromosome;GO:0000235, astral microtubule;GO:0000278, mitotic cell cycle;GO:0000280, nuclear division;GO:0000281, mitotic cytokinesis;GO:0000775, chromosome, centromeric region;GO:0000776, kinetochore;GO:0000777, condensed …	EDO49131.1 predicted protein, partial [Nematostella vectensis] 1.15e-111	-
TRINITY_DN12678_c0_g1	2.1213	1.71392	1.57005	-0.187296	-2.76819	-2.26145	-0.362252	-0.603765	0.777672	1	-	-	-	-	sp|Q00808|HETE1_PODAS Vegetative incompatibility protein HET-E-1 OS=Podospora anserina GN=HET-E1 PE=3 SV=1 2.70e-83	-	CAF1012293.1 unnamed protein product [Rotaria sp. Silwood1] >CAF1320666.1 unnamed protein product [Rotaria sp. Silwood1] >CAF3520371.1 unnamed protein product [Rotaria sp. Silwood1] >CAF4506557.1 unnamed protein product [Rotaria sp. Silwood1] 3.51e-06	-
TRINITY_DN12722_c0_g1	1.21129	1.38375	1.67543	-1.14027	-1.25991	-1.02588	0.815399	-0.45477	-1.20504	1	-	pfam00549, Ligase_CoA, CoA-ligase. This family includes the CoA ligases Succinyl-CoA synthetase alpha and beta chains, malate CoA ligase and ATP-citrate lyase. Some members of the family utilize ATP others use GTP. 1.09e-09	K01899-ko00020 Citrate cycle (TCA cycle);ko01200 Carbon metabolism;ko00640 Propanoate metabolism	KOG1255, KOG1255, KOG1255, Succinyl-CoA synthetase, alpha subunit [Energy production and conversion]. 2.42e-67	sp|P53598|SUCA_YEAST Succinyl-CoA ligase [ADP-forming] subunit alpha, mitochondrial OS=Saccharomyces cerevisiae (strain ATCC 204508 / S288c) GN=LSC1 PE=1 SV=1 4.51e-72	-	CAG9823540.1 unnamed protein product [Phaedon cochleariae] 3.06e-82	-
TRINITY_DN12784_c0_g1	0.134833	0.818304	1.1856	-1.25765	-0.845002	-1.22167	1.81167	0.336096	-0.96218	1	-	pfam04437, RINT1_TIP1, RINT-1 / TIP-1 family. This family includes RINT-1, a Rad50 interacting protein which participates in radiation induced checkpoint control, as well as the TIP-1 protein from yeast that seems to be involved in a complex with Sec20p that is required for Golgi transport. 4.87e-144	-	KOG0758, KOG0758, KOG0758, Mitochondrial carnitine-acylcarnitine carrier protein [Energy production and conversion]. 5.94e-65	sp|P32331|YMC1_YEAST Carrier protein YMC1, mitochondrial OS=Saccharomyces cerevisiae (strain ATCC 204508 / S288c) GN=YMC1 PE=3 SV=2 8.90e-71	GO:0000724, double-strand break repair via homologous recombination;GO:0000725, recombinational repair;GO:0005575, cellular_component;GO:0005622, intracellular;GO:0005623, cell;GO:0005634, nucleus;GO:0006139, nucleobase-containing compound metabolic process;GO:0006259, DNA metabolic process;GO:0006281, DNA repair;GO:0006302, double-strand break repair;GO:0006310, DNA recombination;GO:0006725, cel…	KAJ3031287.1 Mitochondrial carrier protein ymc2 [Siphonaria sp. JEL0065] 2.81e-59	-
TRINITY_DN12785_c0_g1	-0.0756035	0.467088	1.34857	-1.28214	-1.11788	-1.13396	1.95931	0.421315	-0.586706	1	-	pfam00732, GMC_oxred_N, GMC oxidoreductase. This family of proteins bind FAD as a cofactor. 8.81e-18	-	KOG1238, KOG1238, KOG1238, Glucose dehydrogenase/choline dehydrogenase/mandelonitrile lyase (GMC oxidoreductase family) [General function prediction only]. 9.22e-46	sp|Q00922|ALOX_CANBO Alcohol oxidase OS=Candida boidinii GN=AOD1 PE=1 SV=1 1.77e-112	-	GFR59117.1 choline dehydrogenase [Elysia marginata] 1.61e-50	-
TRINITY_DN12800_c0_g1	1.29982	0.578495	1.90507	-1.02936	-0.935464	-1.31561	0.399659	-0.379156	-0.523442	1	-	pfam14441, OTT_1508_deam, OTT_1508-like deaminase. A member of the nucleic acid/nucleotide deaminase superfamily prototyped by Orientia OTT_1508. Members of this family are present in a wide phyletic range of bacteria,including several intracellular parasites and eukaryotes such as fungi, Leishmania, Selaginella, and some apicomplexa. In bacteria, these deaminases are predicted to function as tox…	-	-	-	-	-	-
TRINITY_DN12821_c0_g1	0.543189	0.652957	1.07659	-0.437528	-1.21886	-0.606358	0.453037	0.1937	-0.656727	1	cd14052, PTKc_Wee1_fungi, Catalytic domain of the Protein Tyrosine Kinases, Fungal Wee1 proteins. PTKs catalyze the transfer of the gamma-phosphoryl group from ATP to tyrosine (tyr) residues in protein substrates. This subfamily is composed of fungal Wee1 proteins, also called Swe1 in budding yeast and Mik1 in fission yeast. Yeast Wee1 is required to control cell size. Wee1 is a cell cycle checkp…	pfam04130, Spc97_Spc98, Spc97 / Spc98 family. The spindle pole body (SPB) functions as the microtubule-organising centre in yeast. Members of this family are spindle pole body (SBP) components such as Spc97 and Spc98 that form a complex with gamma-tubulin. This family of proteins includes the grip motif 1 and grip moti 2. Members of this family all form components of the gamma-tubulin complex, GC…	K03114-ko04111 Cell cycle - yeast;ko04011 MAPK signaling pathway - yeast;ko04113 Meiosis - yeast	KOG2000, KOG2000, KOG2000, Gamma-tubulin complex, DGRIP91/SPC98 component [Cytoskeleton]. 1.55e-84	sp|Q9USQ2|ALP6_SCHPO Spindle pole body component alp6 OS=Schizosaccharomyces pombe (strain 972 / ATCC 24843) GN=alp6 PE=1 SV=2 2.10e-154	-	XP_048588553.1 gamma-tubulin complex component 3 homolog [Nematostella vectensis] 2.63e-110	-
TRINITY_DN12839_c0_g1	0.265474	1.02579	0.974035	-0.425479	-1.80042	-1.27962	0.963994	0.563805	-0.287576	1	cd11063, CYP52, cytochrome P450 family 52. Cytochrome P450 52 (CYP52), also called P450ALK, monooxygenases catalyze the first hydroxylation step in the assimilation of alkanes and fatty acids by filamentous fungi. The number of CYP52 proteins depend on the fungal species: for example, Candida tropicalis has seven, Candida maltose has eight, and Yarrowia lipolytica has twelve. The CYP52 family bel…	pfam00067, p450, Cytochrome P450. Cytochrome P450s are haem-thiolate proteins involved in the oxidative degradation of various compounds. They are particularly well known for their role in the degradation of environmental toxins and mutagens. They can be divided into 4 classes, according to the method by which electrons from NAD(P)H are delivered to the catalytic site. Sequence conservation is re…	-	KOG0157, KOG0157, KOG0157, Cytochrome P450 CYP4/CYP19/CYP26 subfamilies [Secondary metabolites biosynthesis, transport and catabolism, Lipid transport and metabolism]. 1.11e-41	sp|P10615|CP52A_CANTR Cytochrome P450 52A1 OS=Candida tropicalis GN=CYP52A1 PE=1 SV=3 2.10e-86	-	UPN65120.1 cytochrome P450-2, partial [Laodelphax striatellus] 1.47e-48	-
TRINITY_DN12894_c0_g1	0.490561	0.217739	1.14	-0.527808	-0.7179	-0.64973	0.731244	0.0954285	-0.779531	1	-	pfam00933, Glyco_hydro_3, Glycosyl hydrolase family 3 N terminal domain. 2.18e-25	-	-	sp|P27034|BGLS_RHIRD Beta-glucosidase OS=Rhizobium radiobacter GN=cbg-1 PE=3 SV=1 4.13e-99	-	MCL4141981.1 hypothetical protein [Idotea baltica] 4.14e-88	-
TRINITY_DN12914_c0_g1	0.828222	1.00046	1.21616	-0.813431	-1.40547	-0.657097	1.18749	-0.266765	-1.08957	1	cd17323, MFS_Tpo1_MDR_like, Yeast Polyamine transporter 1 (Tpo1) and similar multidrug resistance (MDR) transporters of the Major Facilitator Superfamily. This family is composed of fungal multidrug resistance (MDR) transporters including several proteins from Saccharomyces cerevisiae such as polyamine transporters 1-4 (Tpo1-4), quinidine resistance proteins 1-3 (Qdr1-3), dityrosine transporter 1…	-	-	-	sp|P76628|YGAY_ECOLI Putative uncharacterized transporter YgaY OS=Escherichia coli (strain K12) GN=ygaY PE=5 SV=2 1.37e-35	-	KAF5296878.1 hypothetical protein FQR65_LT19786 [Abscondita terminalis] 4.22e-28	-
TRINITY_DN12984_c0_g1	0.575738	0.976628	1.85417	-0.055238	-2.05806	-1.65375	0.807883	0.0273758	-0.474745	1	-	pfam01593, Amino_oxidase, Flavin containing amine oxidoreductase. This family consists of various amine oxidases, including maze polyamine oxidase (PAO) and various flavin containing monoamine oxidases (MAO). The aligned region includes the flavin binding site of these enzymes. The family also contains phytoene dehydrogenases and related enzymes. In vertebrates MAO plays an important role regulat…	-	KOG0029, KOG0029, KOG0029, Amine oxidase [Secondary metabolites biosynthesis, transport and catabolism]. 1.03e-06	sp|O34363|YOBN_BACSU Putative L-amino-acid oxidase YobN OS=Bacillus subtilis (strain 168) GN=yobN PE=3 SV=3 3.39e-48	-	RDD39479.1 putative L-amino-acid oxidase YobN [Trichoplax sp. H2] 4.26e-64	-
TRINITY_DN12997_c0_g1	0.854471	0.733492	1.96201	-1.08103	-0.837833	-0.432326	0.924193	-0.64823	-1.47476	1	-	pfam01425, Amidase, Amidase. 2.26e-29	K01426-ko00627 Aminobenzoate degradation;ko00643 Styrene degradation;ko00360 Phenylalanine metabolism;ko00380 Tryptophan metabolism;ko00330 Arginine and proline metabolism	KOG1212, KOG1212, KOG1212, Amidases [Translation, ribosomal structure and biogenesis, Lipid transport and metabolism, Signal transduction mechanisms]. 2.71e-55	sp|Q12559|AMDS_ASPOR Acetamidase OS=Aspergillus oryzae (strain ATCC 42149 / RIB 40) GN=amdS PE=3 SV=2 1.31e-89	-	CAF3711633.1 unnamed protein product [Rotaria sp. Silwood1] 1.57e-97	-
TRINITY_DN13002_c0_g3	-0.1155	0.157693	1.56168	-1.01445	-1.44748	-1.07056	1.1934	0.685725	0.0494929	1	sd00016, Apc5, Tetratricopeptide repeat (TPR)-like motif of Apc5 and similar motifs. Apc5 is a subunit of the anaphase-promoting complex/cyclosome (APC/C) which is a multi-subunit ubiquitin ligase that mediates the proteolysis of cell cycle proteins in mitosis and G1. Apc5 binds the poly(A) binding protein (PABP), which directly binds the internal ribosome entry site (IRES) of growth factor 2 mRN…	pfam12862, ANAPC5, Anaphase-promoting complex subunit 5. Apc5 is a subunit of the anaphase-promoting complex/cyclosome (APC/C) which is a multi-subunit ubiquitin ligase that mediates the proteolysis of cell cycle proteins in mitosis and G1. Apc5, although it does not harbour a classical RNA binding domain, Apc5 binds the poly(A) binding protein (PABP), which directly binds the internal ribosome e…	K03352-ko04110 Cell cycle;ko04114 Oocyte meiosis;ko04914 Progesterone-mediated oocyte maturation;ko04111 Cell cycle - yeast;ko04120 Ubiquitin mediated proteolysis;ko04113 Meiosis - yeast	KOG4322, KOG4322, KOG4322, Anaphase-promoting complex (APC), subunit 5 [Cell cycle control, cell division, chromosome partitioning, Posttranslational modification, protein turnover, chaperones]. 9.60e-25	sp|O42636|CIA30_NEUCR Complex I intermediate-associated protein 30, mitochondrial OS=Neurospora crassa (strain ATCC 24698 / 74-OR23-1A / CBS 708.71 / DSM 1257 / FGSC 987) GN=cia30 PE=1 SV=1 1.24e-93	GO:0000151, ubiquitin ligase complex;GO:0000152, nuclear ubiquitin ligase complex;GO:0005575, cellular_component;GO:0005622, intracellular;GO:0005623, cell;GO:0005634, nucleus;GO:0005680, anaphase-promoting complex;GO:0006508, proteolysis;GO:0006511, ubiquitin-dependent protein catabolic process;GO:0006807, nitrogen compound metabolic process;GO:0007088, regulation of mitotic nuclear division;GO:…	CAA67682.1 unnamed protein product [Mus musculus] 3.87e-20	-
TRINITY_DN13012_c0_g1	1.22444	1.00418	2.09017	-1.32178	-1.29343	-1.40378	1.24478	-0.251697	-1.29289	1	cd01298, ATZ_TRZ_like, TRZ/ATZ family contains enzymes from the atrazine degradation pathway and related hydrolases. Atrazine, a chlorinated herbizide, can be catabolized by a variety of different bacteria. The first three steps of the atrazine dehalogenation pathway are catalyzed by atrazine chlorohydrolase (AtzA), hydroxyatrazine ethylaminohydrolase (AtzB), and N-isopropylammelide N-isopropylam…	pfam01979, Amidohydro_1, Amidohydrolase family. This family of enzymes are a a large metal dependent hydrolase superfamily. The family includes Adenine deaminase EC:3.5.4.2 that hydrolyzes adenine to form hypoxanthine and ammonia. Adenine deaminases reaction is important for adenine utilisation as a purine and also as a nitrogen source. This family also includes dihydroorotase and N-acetylglucosa…	-	KOG3968, KOG3968, KOG3968, Atrazine chlorohydrolase/guanine deaminase [Nucleotide transport and metabolism, Secondary metabolites biosynthesis, transport and catabolism]. 1.07e-20	sp|A5UMN6|DADD_METS3 5'-deoxyadenosine deaminase OS=Methanobrevibacter smithii (strain PS / ATCC 35061 / DSM 861) GN=dadD PE=3 SV=1 6.95e-66	-	CAF0986246.1 unnamed protein product [Adineta steineri] >CAF1024780.1 unnamed protein product [Adineta steineri] 1.01e-137	-
TRINITY_DN13024_c0_g2	0.950145	1.03698	0.794513	-0.448666	-0.976709	-1.00405	-0.230377	-0.0812476	-0.040591	1	-	-	K17775-ko04139 Regulation of mitophagy - yeast	-	sp|A4QT54|MDM34_MAGO7 Mitochondrial distribution and morphology protein 34 OS=Magnaporthe oryzae (strain 70-15 / ATCC MYA-4617 / FGSC 8958) GN=MDM34 PE=3 SV=2 2.65e-44	GO:0005575, cellular_component;GO:0005622, intracellular;GO:0005623, cell;GO:0005737, cytoplasm;GO:0005739, mitochondrion;GO:0005740, mitochondrial envelope;GO:0005741, mitochondrial outer membrane;GO:0005783, endoplasmic reticulum;GO:0006810, transport;GO:0006811, ion transport;GO:0006820, anion transport;GO:0006869, lipid transport;GO:0006996, organelle organization;GO:0007005, mitochondrion or…	KAJ3031617.1 ERMES complex subunit [Siphonaria sp. JEL0065] 2.49e-16	-
TRINITY_DN13044_c0_g1	-0.0716674	-0.081149	1.83029	-1.15442	-1.09243	-1.30945	1.68264	0.334523	-0.138335	1	cd01833, XynB_like, SGNH_hydrolase subfamily, similar to Ruminococcus flavefaciens XynB. Most likely a secreted hydrolase with xylanase activity. SGNH hydrolases are a diverse family of lipases and esterases. The tertiary fold of the enzyme is substantially different from that of the alpha/beta hydrolase family and unique among all known hydrolases; its active site closely resembles the Ser-His-A…	-	-	-	-	-	-	-
TRINITY_DN13064_c0_g1	0.605878	0.659335	0.82267	-0.43422	-1.12256	-0.846765	0.370259	0.116975	-0.171572	1	-	-	-	-	-	-	-	-
TRINITY_DN13085_c0_g1	1.52205	2.00587	1.86622	-0.896018	-2.67242	-2.16242	0.795525	-0.0230998	-0.435709	1	cd05474, SAP_like, SAPs, pepsin-like proteinases secreted from pathogens to degrade host proteins. SAPs (Secreted aspartic proteinases) are secreted from a group of pathogenic fungi, predominantly Candida species. They are secreted from the pathogen to degrade host proteins. SAP is one of the most significant extracellular hydrolytic enzymes produced by C. albicans. SAP proteins, encoded by a fam…	pfam00026, Asp, Eukaryotic aspartyl protease. Aspartyl (acid) proteases include pepsins, cathepsins, and renins. Two-domain structure, probably arising from ancestral duplication. This family does not include the retroviral nor retrotransposon proteases (pfam00077), which are much smaller and appear to be homologous to a single domain of the eukaryotic asp proteases. 2.12e-29	-	KOG3378, KOG3378, KOG3378, Hemoglobin-like flavoprotein [Energy production and conversion]. 1.76e-33	sp|Q7WUM8|HMP_RHIME Flavohemoprotein OS=Rhizobium meliloti (strain 1021) GN=hmp PE=3 SV=2 1.99e-72	-	GFR71550.1 flavohemoprotein [Elysia marginata] 2.58e-60	-
TRINITY_DN13133_c0_g1	1.3757	1.95764	1.82837	-1.57382	-1.2714	-2.98422	1.43763	0.026771	-0.796667	1	cd00078, HECTc, HECT domain; C-terminal catalytic domain of a subclass of Ubiquitin-protein ligase (E3). It binds specific ubiquitin-conjugating enzymes (E2), accepts ubiquitin from E2, transfers ubiquitin to substrate lysine side chains, and transfers additional ubiquitin molecules to the end of growing ubiquitin chains. 4.49e-74	pfam00632, HECT, HECT-domain (ubiquitin-transferase). The name HECT comes from Homologous to the E6-AP Carboxyl Terminus. 2.42e-64	-	KOG0941, KOG0941, KOG0941, E3 ubiquitin protein ligase [Posttranslational modification, protein turnover, chaperones]. 3.28e-112	sp|O94275|MUG30_SCHPO Probable E3 ubiquitin-protein ligase mug30 OS=Schizosaccharomyces pombe (strain 972 / ATCC 24843) GN=mug30 PE=1 SV=1 9.23e-118	GO:0003674, molecular_function;GO:0003824, catalytic activity;GO:0004842, ubiquitin-protein transferase activity;GO:0005575, cellular_component;GO:0005622, intracellular;GO:0005623, cell;GO:0005628, prospore membrane;GO:0005737, cytoplasm;GO:0006464, cellular protein modification process;GO:0006807, nitrogen compound metabolic process;GO:0008150, biological_process;GO:0008152, metabolic process;G…	XP_039301583.1 LOW QUALITY PROTEIN: probable E3 ubiquitin-protein ligase mug30 [Nilaparvata lugens] 2.27e-253	-
TRINITY_DN13153_c0_g2	0.396782	0.60916	1.36133	-0.922472	-1.35467	-0.795641	0.923449	0.354047	-0.571989	1	-	-	-	-	-	-	-	-
TRINITY_DN13187_c0_g1	0.708489	1.24938	1.98889	-0.596569	-1.26819	-2.18955	0.499654	-0.160734	-0.231381	1	cd20264, Complex1_LYR_LYRM4, LYR (leucine-tyrosine-arginine) motif found in LYR motif-containing protein 4 (LYRM4) and similar proteins. LYRM4, also called ISD11, is a eukaryote-specific component of the mitochondrial biogenesis of Fe-S clusters which are essential cofactors in multiple processes, including oxidative phosphorylation. It is required for nuclear and mitochondrial iron-sulfur protei…	pfam05347, Complex1_LYR, Complex 1 protein (LYR family). Proteins in this family include an accessory subunit of the higher eukaryotic NADH dehydrogenase complex. In Saccharomyces cerevisiae, the Isd11 protein has been shown to play a role in Fe/S cluster biogenesis in mitochondria. We have named this family LYR after a highly conserved tripeptide motif close to the N-terminus of these proteins. …	-	KOG3801, KOG3801, KOG3801, Uncharacterized conserved protein BCN92 [RNA processing and modification]. 2.14e-20	sp|Q0VCG0|LYRM4_BOVIN LYR motif-containing protein 4 OS=Bos taurus GN=LYRM4 PE=3 SV=1 4.13e-19	GO:0005575, cellular_component;GO:0005622, intracellular;GO:0005623, cell;GO:0005737, cytoplasm;GO:0005739, mitochondrion;GO:0005740, mitochondrial envelope;GO:0005743, mitochondrial inner membrane;GO:0005759, mitochondrial matrix;GO:0005829, cytosol;GO:0006790, sulfur compound metabolic process;GO:0008150, biological_process;GO:0008152, metabolic process;GO:0009987, cellular process;GO:0016020, …	XP_013075161.1 PREDICTED: LYR motif-containing protein 4-like [Biomphalaria glabrata] >KAI8790553.1 LYR motif-containing protein 4-like [Biomphalaria glabrata] 2.03e-13	-
TRINITY_DN13212_c0_g1	0.691785	0.750423	1.20095	-1.02513	-1.07276	-0.732463	0.718048	-0.0405986	-0.490259	1	cd17383, MFS_SLC18A3_VAChT, Vesicular acetylcholine transporter (VAChT) and similar transporters of the Major Facilitator Superfamily. Vesicular acetylcholine transporter (VAChT) is also called solute carrier family 18 member 3 (SLC18A3) in vertebrates and uncoordinated protein 17 (unc-17) in Caenorhabditis elegans. It is a glycoprotein involved in acetylcholine transport into synaptic vesicles a…	-	-	KOG3764, KOG3764, KOG3764, Vesicular amine transporter [Intracellular trafficking, secretion, and vesicular transport]. 7.22e-13	sp|O74852|YQ92_SCHPO Uncharacterized MFS-type transporter C18.02 OS=Schizosaccharomyces pombe (strain 972 / ATCC 24843) GN=SPCC18.02 PE=3 SV=1 4.81e-94	GO:0003674, molecular_function;GO:0005215, transporter activity;GO:0005575, cellular_component;GO:0005623, cell;GO:0005886, plasma membrane;GO:0005887, integral component of plasma membrane;GO:0006810, transport;GO:0008150, biological_process;GO:0016020, membrane;GO:0016021, integral component of membrane;GO:0022857, transmembrane transporter activity;GO:0031224, intrinsic component of membrane;G…	KAJ3030288.1 hypothetical protein HDU68_009559 [Siphonaria sp. JEL0065] 7.18e-32	-
TRINITY_DN13214_c0_g1	0.210544	-0.101237	1.14255	-0.970241	-0.746656	-1.35352	1.87538	0.582571	-0.639387	1	cd21092, TPT_S35C2, solute carrier family 35 member C2, member of the triose-phosphate transporter family. Solute carrier family 35 member C2 (S35C2 or Slc35c2), also called ovarian cancer-overexpressed gene 1 protein (OVCOV1), is a member of the triose-phosphate transporter (TPT) family, which is part of the drug/metabolite transporter (DMT) superfamily. It may function either as a GDP-fucose tr…	-	-	KOG1441, KOG1441, KOG1441, Glucose-6-phosphate/phosphate and phosphoenolpyruvate/phosphate antiporter [Carbohydrate transport and metabolism, Amino acid transport and metabolism]. 5.45e-22	sp|Q3E6T0|PT525_ARATH Probable sugar phosphate/phosphate translocator At5g25400 OS=Arabidopsis thaliana GN=At5g25400 PE=2 SV=1 3.74e-39	-	KAJ3025443.1 hypothetical protein HDU68_007127 [Siphonaria sp. JEL0065] 1.80e-52	-
TRINITY_DN13215_c0_g1	0.687985	0.618773	1.37822	-0.572124	-0.919486	-0.959958	0.617523	-0.0257741	-0.82516	1	cd07415, MPP_PP2A_PP4_PP6, PP2A, PP4, and PP6 phosphoprotein phosphatases, metallophosphatase domain. PP2A-like family of phosphoprotein phosphatases (PPP's) including PP4 and PP6. PP2A (Protein phosphatase 2A) is a critical regulator of many cellular activities. PP2A comprises about 1% of total cellular proteins. PP2A, together with protein phosphatase 1 (PP1), accounts for more than 90% of all …	pfam00149, Metallophos, Calcineurin-like phosphoesterase. This family includes a diverse range of phosphoesterases, including protein phosphoserine phosphatases, nucleotidases, sphingomyelin phosphodiesterases and 2'-3' cAMP phosphodiesterases as well as nucleases such as bacterial SbcD or yeast MRE11. The most conserved regions in this superfamily centre around the metal chelating residues. 6.71…	-	KOG0371, KOG0371, KOG0371, Serine/threonine protein phosphatase 2A, catalytic subunit [Signal transduction mechanisms]. 7.48e-161	sp|P48580|PP2A1_NEUCR Serine/threonine-protein phosphatase PP2A catalytic subunit OS=Neurospora crassa (strain ATCC 24698 / 74-OR23-1A / CBS 708.71 / DSM 1257 / FGSC 987) GN=pph-1 PE=3 SV=3 5.06e-14	-	KAJ3026055.1 Serine/threonine-protein phosphatase PP2A catalytic subunit [Siphonaria sp. JEL0065] 1.79e-173	PREDICTED: Pollicipes pollicipes serine/threonine-protein phosphatase 2A catalytic subunit beta isoform (LOC119104250), mRNA 1.66e-148
TRINITY_DN13265_c0_g1	0.972713	0.889789	1.81175	-1.13703	-1.47269	-1.57295	1.64974	0.135464	-1.27679	1	cd01359, Argininosuccinate_lyase, Argininosuccinate lyase (argininosuccinase, ASAL). This group contains ASAL and related proteins. It is a member of the Lyase class I family. Members of this family for the most part catalyze similar beta-elimination reactions in which a C-N or C-O bond is cleaved with the release of fumarate as one of the products. These proteins are active as tetramers. The fou…	pfam00206, Lyase_1, Lyase. 4.06e-35	K01755-ko01230 Biosynthesis of amino acids;ko00250 Alanine, aspartate and glutamate metabolism;ko00220 Arginine biosynthesis	KOG1316, KOG1316, KOG1316, Argininosuccinate lyase [Amino acid transport and metabolism]. 0.0	sp|P50514|ARLZ_SCHPO Probable argininosuccinate lyase OS=Schizosaccharomyces pombe (strain 972 / ATCC 24843) GN=argx PE=3 SV=1 0.0	-	XP_021364765.1 argininosuccinate lyase-like [Mizuhopecten yessoensis] >XP_021364766.1 argininosuccinate lyase-like [Mizuhopecten yessoensis] >OWF44901.1 Argininosuccinate lyase [Mizuhopecten yessoensis] 1.89e-167	-
TRINITY_DN13305_c0_g1	0.847157	0.722939	0.619026	0.0156327	-1.20557	-0.367578	0.114513	-0.0622779	-0.68384	1	cd01377, MYSc_class_II, class II myosins, motor domain. Myosin motor domain in class II myosins. Class II myosins, also called conventional myosins, are the myosin type responsible for producing actomyosin contraction in metazoan muscle and non-muscle cells. Myosin II contains two heavy chains made up of the head (N-terminal) and tail (C-terminal) domains with a coiled-coil morphology that holds …	pfam00063, Myosin_head, Myosin head (motor domain). 0.0	K10352-ko04530 Tight junction	KOG0161, KOG0161, KOG0161, Myosin class II heavy chain [Cytoskeleton]. 0.0	sp|Q9USI6|MYO2_SCHPO Myosin type-2 heavy chain 1 OS=Schizosaccharomyces pombe (strain 972 / ATCC 24843) GN=myo2 PE=1 SV=1 0.0	GO:0000131, incipient cellular bud site;GO:0000146, microfilament motor activity;GO:0000166, nucleotide binding;GO:0000278, mitotic cell cycle;GO:0000281, mitotic cytokinesis;GO:0000910, cytokinesis;GO:0000912, assembly of actomyosin apparatus involved in cytokinesis;GO:0000915, actomyosin contractile ring assembly;GO:0000916, actomyosin contractile ring contraction;GO:0000920, cell separation af…	XP_039283058.1 LOW QUALITY PROTEIN: myosin type-2 heavy chain 1-like [Nilaparvata lugens] 0.0	PREDICTED: Diabrotica virgifera virgifera myosin heavy chain, non-muscle (LOC114332917), transcript variant X6, mRNA 3.23e-28
TRINITY_DN13375_c0_g1	0.854874	1.06925	0.356725	-0.520536	-1.30286	-1.28471	-0.199031	0.376871	0.649428	1	cd20557, CYCLIN_ScPCL1-like, cyclin box found in Saccharomyces cerevisiae G1/S-specific cyclin PCL1, PCL2 and similar proteins. The family includes a group of cyclin-like proteins that interact with the Pho85 cyclin-dependent kinase, such as Saccharomyces cerevisiae G1/S-specific cyclin PCL1, PCL2, PCL9 and their vertebrate counterparts, cyclin Pas1/PHO80 domain-containing protein 1 (CNPPD1). PCL…	-	-	-	sp|P87049|CGP1_SCHPO G1/S-specific cyclin pas1 OS=Schizosaccharomyces pombe (strain 972 / ATCC 24843) GN=pas1 PE=2 SV=3 2.15e-21	GO:0000082, G1/S transition of mitotic cell cycle;GO:0000083, regulation of transcription involved in G1/S transition of mitotic cell cycle;GO:0000278, mitotic cell cycle;GO:0000307, cyclin-dependent protein kinase holoenzyme complex;GO:0001932, regulation of protein phosphorylation;GO:0003674, molecular_function;GO:0005575, cellular_component;GO:0005622, intracellular;GO:0005623, cell;GO:0005634…	KAJ3028188.1 hypothetical protein HDU68_002273 [Siphonaria sp. JEL0065] 2.32e-35	-
TRINITY_DN13385_c0_g2	2.15908	1.35927	0.922255	-0.0715237	-0.27443	-0.927471	-0.803314	-1.01774	-1.34612	1	-	-	-	-	-	-	-	-
TRINITY_DN13431_c0_g1	1.14531	1.66188	1.26693	-0.287876	-1.5391	-1.14267	0.148733	-0.553641	-0.699576	1	-	pfam01566, Nramp, Natural resistance-associated macrophage protein. The natural resistance-associated macrophage protein (NRAMP) family consists of Nramp1, Nramp2, and yeast proteins Smf1 and Smf2. The NRAMP family is a novel family of functional related proteins defined by a conserved hydrophobic core of ten transmembrane domains. This family of membrane proteins are divalent cation transporters…	-	KOG1291, KOG1291, KOG1291, Mn2+ and Fe2+ transporters of the NRAMP family [Inorganic ion transport and metabolism]. 3.62e-50	sp|P38925|SMF1_YEAST Manganese transporter SMF1 OS=Saccharomyces cerevisiae (strain ATCC 204508 / S288c) GN=SMF1 PE=1 SV=2 3.23e-109	GO:0000041, transition metal ion transport;GO:0000322, storage vacuole;GO:0000323, lytic vacuole;GO:0000324, fungal-type vacuole;GO:0000329, fungal-type vacuole membrane;GO:0003674, molecular_function;GO:0005215, transporter activity;GO:0005384, manganese ion transmembrane transporter activity;GO:0005575, cellular_component;GO:0005622, intracellular;GO:0005623, cell;GO:0005737, cytoplasm;GO:00057…	CAF1251190.1 unnamed protein product [Didymodactylos carnosus] >CAF4020425.1 unnamed protein product [Didymodactylos carnosus] 4.00e-91	-
TRINITY_DN13433_c0_g2	0.331421	0.522358	0.573673	-0.714572	-0.675379	-1.95138	0.90093	0.584926	0.428019	1	-	-	-	-	-	-	-	-
TRINITY_DN13443_c0_g1	1.56269	1.71052	1.98547	-1.41671	-0.728262	-1.7443	0.10168	-0.368142	-1.10295	1	-	-	-	-	-	-	-	-
TRINITY_DN13444_c0_g1	0.78594	0.897213	0.992516	-0.613283	-0.848078	-1.02022	0.462618	-0.0778588	-0.578844	1	-	pfam00933, Glyco_hydro_3, Glycosyl hydrolase family 3 N terminal domain. 1.32e-24	-	-	sp|Q56078|BGLX_SALTY Periplasmic beta-glucosidase OS=Salmonella typhimurium (strain LT2 / SGSC1412 / ATCC 700720) GN=bglX PE=3 SV=2 4.60e-08	-	XP_007470237.1 PREDICTED: lysosomal beta glucosidase-like [Lipotes vexillifer] >TCU00073.1 beta-glucosidase [Pseudomonas sp. LP_4_YM] >CRN05140.1 Periplasmic beta-glucosidase precursor [Pseudomonas sp. URMO17WK12:I11] 5.12e-73	-
TRINITY_DN13461_c0_g1	0.441696	0.49201	0.861217	-0.825635	-1.31382	-0.938484	1.07881	0.2188	-0.0146	1	cd09317, TDT_Mae1_like, C4-dicarboxylate transporter/malic acid transport protein family includes Mae1. This family contains eukaryotic homologs of C4-dicarboxylate transporter/malic acid transport proteins which are part of the Tellurite-resistance/Dicarboxylate Transporter (TDT) family. This includes the MAE1 gene in Schizosaccharomyces pombe gene that encodes malate permease, Mae1, which funct…	pfam03595, SLAC1, Voltage-dependent anion channel. This family of transporters has ten alpha helical transmembrane segments. The structure of a bacterial homolog of SLAC1 shows it to have a trimeric arrangement. The pore is composed of five helices with a conserved Phe residue involved in gating. One homolog, Mae1 from the yeast Schizosaccharomyces pombe, functions as a malate uptake transporter;…	-	-	sp|O59815|MAE2_SCHPO Putative malic acid transport protein OS=Schizosaccharomyces pombe (strain 972 / ATCC 24843) GN=SPCC794.06 PE=3 SV=1 1.19e-17	-	CAF0988866.1 unnamed protein product [Adineta ricciae] >CAF1529066.1 unnamed protein product [Adineta ricciae] 8.11e-56	-
TRINITY_DN13492_c0_g1	0.917296	1.25885	1.29713	-0.238231	-1.07217	-0.953383	-0.285517	-0.385619	-0.538358	1	cd06183, cyt_b5_reduct_like, Cytochrome b5 reductase catalyzes the reduction of 2 molecules of cytochrome b5 using NADH as an electron donor. Like ferredoxin reductases, these proteins have an N-terminal FAD binding subdomain and a C-terminal NADH binding subdomain, separated by a cleft, which accepts FAD. The NADH-binding moiety interacts with part of the FAD and resembles a Rossmann fold. Howev…	pfam00175, NAD_binding_1, Oxidoreductase NAD-binding domain. Xanthine dehydrogenases, that also bind FAD/NAD, have essentially no similarity. 5.34e-25	K00326-ko00520 Amino sugar and nucleotide sugar metabolism	KOG0534, KOG0534, KOG0534, NADH-cytochrome b-5 reductase [Coenzyme transport and metabolism, Energy production and conversion]. 5.46e-60	sp|A7EKT5|MCR1_SCLS1 NADH-cytochrome b5 reductase 2 OS=Sclerotinia sclerotiorum (strain ATCC 18683 / 1980 / Ss-1) GN=mcr1 PE=3 SV=1 2.53e-146	GO:0003674, molecular_function;GO:0003824, catalytic activity;GO:0004128, cytochrome-b5 reductase activity, acting on NAD(P)H;GO:0005575, cellular_component;GO:0005622, intracellular;GO:0005623, cell;GO:0005737, cytoplasm;GO:0005739, mitochondrion;GO:0005740, mitochondrial envelope;GO:0005741, mitochondrial outer membrane;GO:0005758, mitochondrial intermembrane space;GO:0006066, alcohol metabolic…	KAJ3022018.1 NADH-cytochrome b5 reductase [Siphonaria sp. JEL0065] 8.68e-66	-
TRINITY_DN13493_c0_g2	0.331097	0.662559	1.19914	-0.671102	-1.07823	-1.30396	0.733476	-0.25445	0.381462	1	-	pfam02935, COX7C, Cytochrome c oxidase subunit VIIc. Cytochrome c oxidase, a 13 sub-unit complex, EC:1.9.3.1 is the terminal oxidase in the mitochondrial electron transport chain. This family is composed of cytochrome c oxidase subunit VIIc. The yeast member of this family is called COX VIII. 7.90e-09	K02272-ko04260 Cardiac muscle contraction;ko00190 Oxidative phosphorylation	-	-	-	-	-
TRINITY_DN13509_c2_g1	1.43717	1.14657	0.757385	0.046395	-1.49673	-0.792233	-1.58023	-0.341841	0.823512	1	-	-	-	-	-	-	-	-
TRINITY_DN13527_c0_g1	1.04027	1.446	1.99354	-1.24461	-1.21236	-0.8181	0.144967	-0.297926	-1.05178	1	cd12148, fungal_TF_MHR, fungal transcription factor regulatory middle homology region. This domain is present in the large family of fungal zinc cluster transcription factors that contain an N-terminal GAL4-like C6 zinc binuclear cluster DNA-binding domain. Examples of members of this large fungal group are the following Saccharomyces cerevisiae transcription factors, GAL4, STB5, DAL81, CAT8, RDR…	pfam04082, Fungal_trans, Fungal specific transcription factor domain. 1.09e-08	-	-	sp|Q1MTM9|YFN1_SCHPO Uncharacterized transcriptional regulatory protein C1327.01c OS=Schizosaccharomyces pombe (strain 972 / ATCC 24843) GN=SPAC1327.01c PE=1 SV=2 9.24e-17	GO:0000976, transcription regulatory region sequence-specific DNA binding;GO:0000977, RNA polymerase II regulatory region sequence-specific DNA binding;GO:0000978, RNA polymerase II proximal promoter sequence-specific DNA binding;GO:0000981, RNA polymerase II transcription factor activity, sequence-specific DNA binding;GO:0000982, transcription factor activity, RNA polymerase II proximal promoter…	KAJ3019912.1 hypothetical protein HDU68_010434 [Siphonaria sp. JEL0065] 8.44e-13	-
TRINITY_DN13530_c0_g1	2.09328	1.82103	1.92885	-1.05429	-1.37443	-1.2174	-0.406657	-0.781399	-1.00898	1	-	-	-	-	-	-	-	-
TRINITY_DN13544_c0_g2	0.612153	0.885797	1.1313	-0.417872	-0.699909	-1.11109	0.526031	-0.142797	-0.783607	1	-	pfam10173, Mit_KHE1, Mitochondrial K+-H+ exchange-related. The members of this family function as mitochondrial potassium-hydrogen exchange transporters. The family is part of a large mitochondrial KHE protein complex. 2.15e-10	-	-	sp|Q9NWF9|RN216_HUMAN E3 ubiquitin-protein ligase RNF216 OS=Homo sapiens GN=RNF216 PE=1 SV=3 6.90e-21	-	XP_020894902.1 E3 ubiquitin-protein ligase RNF216 [Exaiptasia diaphana] 1.89e-34	-
TRINITY_DN13545_c0_g1	1.24454	1.28357	1.28526	0.133037	-0.500663	-0.615943	-0.367569	-1.00385	-1.45838	1	cd02933, OYE_like_FMN, Old yellow enzyme (OYE)-like FMN binding domain. OYE was the first flavin-dependent enzyme identified, however its true physiological role remains elusive to this day. Each monomer of OYE contains FMN as a non-covalently bound cofactor, uses NADPH as a reducing agent with oxygens, quinones, and alpha,beta-unsaturated aldehydes and ketones, and can act as electron acceptors …	pfam00724, Oxidored_FMN, NADH:flavin oxidoreductase / NADH oxidase family. 2.21e-42	-	KOG0134, KOG0134, KOG0134, NADH:flavin oxidoreductase/12-oxophytodienoate reductase [Energy production and conversion, General function prediction only]. 2.97e-34	sp|E9JFX9|DMOA_HYPSL Dimethyl-sulfide monooxygenase OS=Hyphomicrobium sulfonivorans GN=dmoA PE=1 SV=1 2.52e-93	-	KAF5293245.1 hypothetical protein FQR65_LT20130 [Abscondita terminalis] 3.80e-84	-
TRINITY_DN13546_c0_g2	1.38827	1.46699	1.35578	-0.119757	-0.787126	-0.811749	-0.47334	-1.26548	-0.753591	1	-	pfam03403, PAF-AH_p_II, Platelet-activating factor acetylhydrolase, isoform II. Platelet-activating factor acetylhydrolase (PAF-AH) is a subfamily of phospholipases A2, responsible for inactivation of platelet-activating factor through cleavage of an acetyl group. Three known PAF-AHs are the brain heterotrimeric PAF-AH Ib, whose catalytic beta and gamma subunits are aligned in pfam02266, the extr…	K01062-ko00565 Ether lipid metabolism	KOG3847, KOG3847, KOG3847, Phospholipase A2 (platelet-activating factor acetylhydrolase in humans) [Lipid transport and metabolism]. 1.61e-19	sp|Q8VDG7|PAFA2_MOUSE Platelet-activating factor acetylhydrolase 2, cytoplasmic OS=Mus musculus GN=Pafah2 PE=1 SV=2 7.17e-18	-	KAJ3029254.1 Platelet-activating factor acetylhydrolase [Siphonaria sp. JEL0065] 6.02e-23	-
TRINITY_DN13558_c0_g1	0.612593	0.822782	0.727162	-1.0398	-0.600085	-1.08543	1.03828	0.0833897	-0.55889	1	cd13592, PBP2_HisGL2, The catalytic domain of hexameric long form HisGL2; contains the type 2 periplasmic binding protein fold. Encoded by the hisG gene, the ATP phosphoribosyltransferase (ATP-PRT, EC 2.4.2.17) is the first enzyme in histidine biosynthetic pathway that catalyzes the condensation of ATP and PRPP (5'-phosphoribosyl 1'-pyrophosphate), and is regulated by a feedback inhibition from t…	pfam12009, Telomerase_RBD, Telomerase ribonucleoprotein complex - RNA binding domain. Telomeres in most organisms are comprised of tandem simple sequence repeats. The total length of telomeric repeat sequence at each chromosome end is determined in a balance of sequence loss and sequence addition. One major influence on telomere length is the enzyme telomerase. It is a reverse transcriptase that …	-	KOG2831, KOG2831, KOG2831, ATP phosphoribosyltransferase [Amino acid transport and metabolism]. 5.54e-67	sp|Q99145|HIS1_YARLI ATP phosphoribosyltransferase OS=Yarrowia lipolytica (strain CLIB 122 / E 150) GN=HIS1 PE=3 SV=1 2.91e-102	GO:0000228, nuclear chromosome;GO:0000333, telomerase catalytic core complex;GO:0000723, telomere maintenance;GO:0000781, chromosome, telomeric region;GO:0000782, telomere cap complex;GO:0000784, nuclear chromosome, telomeric region;GO:0001302, replicative cell aging;GO:0003674, molecular_function;GO:0003676, nucleic acid binding;GO:0003677, DNA binding;GO:0003720, telomerase activity;GO:0003721,…	KAJ3029986.1 ATP phosphoribosyltransferase (ATP-PRTase) (ATP-PRT) [Siphonaria sp. JEL0065] 4.49e-83	-
TRINITY_DN13570_c0_g2	1.19009	1.74286	1.58065	0.809731	-1.86302	-2.18677	-0.267754	-0.584025	-0.421757	1	cd00764, Eukaryotic_PFK, Phosphofructokinase, a key regulatory enzyme in glycolysis, catalyzes the phosphorylation of fructose-6-phosphate to fructose-1,6-biphosphate. The members belong to a subfamily of the PFKA family (cd00363) and include eukaryotic ATP-dependent phosphofructokinases. These have evolved from the bacterial PFKs by gene duplication and fusion events and exhibit complex alloster…	pfam00365, PFK, Phosphofructokinase. 4.92e-46	K00850-ko00680 Methane metabolism;ko01230 Biosynthesis of amino acids;ko04152 AMPK signaling pathway;ko01200 Carbon metabolism;ko00030 Pentose phosphate pathway;ko00052 Galactose metabolism;ko00010 Glycolysis / Gluconeogenesis;ko00051 Fructose and mannose metabolism;ko03018 RNA degradation	KOG2440, KOG2440, KOG2440, Pyrophosphate-dependent phosphofructo-1-kinase [Carbohydrate transport and metabolism]. 1.20e-22	sp|P78985|PFKA_ASPNG ATP-dependent 6-phosphofructokinase OS=Aspergillus niger GN=pfkA PE=3 SV=1 1.48e-18	GO:0000166, nucleotide binding;GO:0000426, micropexophagy;GO:0001678, cellular glucose homeostasis;GO:0003674, molecular_function;GO:0003676, nucleic acid binding;GO:0003723, RNA binding;GO:0003729, mRNA binding;GO:0003824, catalytic activity;GO:0003872, 6-phosphofructokinase activity;GO:0005488, binding;GO:0005524, ATP binding;GO:0005575, cellular_component;GO:0005622, intracellular;GO:0005623, …	NXD32191.1 PFKA phosphofructokinase [Elachura formosa] 2.90e-249	-
TRINITY_DN13573_c0_g1	0.900439	1.46811	0.943132	-0.578292	-1.17541	-1.84082	0.290115	-0.0056203	-0.00165322	1	-	pfam04137, ERO1, Endoplasmic Reticulum Oxidoreductin 1 (ERO1). Members of this family are required for the formation of disulphide bonds in the ER. 1.00e-108	-	KOG2608, KOG2608, KOG2608, Endoplasmic reticulum membrane-associated oxidoreductin involved in disulfide bond formation [Posttranslational modification, protein turnover, chaperones, Intracellular trafficking, secretion, and vesicular transport]. 4.88e-76	sp|Q7SEY9|ERO1_NEUCR Endoplasmic reticulum oxidoreductin-1 OS=Neurospora crassa (strain ATCC 24698 / 74-OR23-1A / CBS 708.71 / DSM 1257 / FGSC 987) GN=ero-1 PE=3 SV=1 0.0	GO:0003674, molecular_function;GO:0003756, protein disulfide isomerase activity;GO:0003824, catalytic activity;GO:0005575, cellular_component;GO:0005622, intracellular;GO:0005623, cell;GO:0005737, cytoplasm;GO:0005783, endoplasmic reticulum;GO:0005789, endoplasmic reticulum membrane;GO:0006457, protein folding;GO:0006464, cellular protein modification process;GO:0006807, nitrogen compound metabol…	KAJ3013097.1 hypothetical protein HDU68_000874 [Siphonaria sp. JEL0065] 1.32e-84	-
TRINITY_DN13583_c0_g1	1.88901	1.90936	1.71029	-0.00209677	-2.92521	-1.31085	-0.43066	-0.608085	-0.231755	1	cd01311, PDC_hydrolase, 2-pyrone-4,6-dicarboxylic acid (PDC) hydrolase hydrolyzes PDC to yield 4-oxalomesaconic acid (OMA) or its tautomer, 4-carboxy-2-hydroxymuconic acid (CHM). This reaction is part of the protocatechuate (PCA) 4,5-cleavage pathway. PCA is one of the most important intermediate metabolites in the bacterial pathways for various phenolic compounds, including lignin, which is the …	pfam02615, Ldh_2, Malate/L-lactate dehydrogenase. This family consists of bacterial and archaeal Malate/L-lactate dehydrogenase. L-lactate dehydrogenase, EC:1.1.1.27, catalyzes the reaction (S)-lactate + NAD(+) <=> pyruvate + NADH. Malate dehydrogenase, EC:1.1.1.37 and EC:1.1.1.82, catalyzes the reactions: (S)-malate + NAD(+) <=> oxaloacetate + NADH, and (S)-malate + NADP(+) <=> oxaloacetate + NA…	-	KOG4153, KOG4153, KOG4153, Fructose 1,6-bisphosphate aldolase [Carbohydrate transport and metabolism]. 1.75e-14	sp|Q58820|COMC_METJA L-sulfolactate dehydrogenase OS=Methanocaldococcus jannaschii (strain ATCC 43067 / DSM 2661 / JAL-1 / JCM 10045 / NBRC 100440) GN=comC PE=1 SV=1 1.33e-54	-	KAH9499210.1 hypothetical protein Btru_004456 [Bulinus truncatus] 1.37e-55	-
TRINITY_DN13589_c0_g1	1.65514	1.19595	0.713927	-0.888213	-1.41513	-1.17004	0.583597	-0.585785	-0.0894511	1	-	-	-	-	-	-	CAF3300523.1 unnamed protein product [Rotaria sp. Silwood2] >CAF4156471.1 unnamed protein product [Rotaria sp. Silwood2] >CAF4269864.1 unnamed protein product [Rotaria sp. Silwood2] 2.61e-11	-
TRINITY_DN13604_c0_g1	1.46024	2.06901	2.18321	-1.5072	-1.46525	-2.13231	0.988532	-0.352921	-1.24332	1	cd16147, G6S, glucosamine (N-acetyl)-6-sulfatase(G6S, GNS) AND sulfatase 1(SULF1). N-acetylglucosamine-6-sulfatase also known as glucosamine (N-acetyl)-6-sulfatase hydrolyzes of the 6-sulfate groups of the N-acetyl-D-glucosamine 6-sulfate units of heparan sulfate and keratan sulfate. Deficient of N-acetylglucosamine-6-sulfatase results in disease of Sanfilippo Syndrome type IIId or Mucopolysaccha…	pfam00884, Sulfatase, Sulfatase. 2.90e-10	-	KOG3731, KOG3731, KOG3731, Sulfatases [Carbohydrate transport and metabolism]. 6.06e-42	sp|Q10723|ARS_VOLCA Arylsulfatase OS=Volvox carteri PE=1 SV=1 1.10e-13	-	KAJ3030951.1 hypothetical protein HDU68_007151 [Siphonaria sp. JEL0065] 1.15e-101	-
TRINITY_DN13626_c0_g2	0.556388	0.977455	1.37417	-0.764342	-0.247116	-1.1173	0.194968	-0.246684	-0.727535	1	-	-	-	-	-	-	-	-
TRINITY_DN13650_c3_g1	0.677512	0.876873	1.39284	-0.516619	-1.25862	-0.744821	0.372318	0.143891	-0.943378	1	cd18617, GH43_XynB-like, Glycosyl hydrolase family 43, such as Bacteroides ovatus alpha-L-arabinofuranosidase (BoGH43, XynB). This glycosyl hydrolase family 43 (GH43) subgroup includes enzymes that have been characterized to have alpha-L-arabinofuranosidase (EC 3.2.1.55) and beta-1,4-xylosidase (beta-D-xylosidase;xylan 1,4-beta-xylosidase; EC 3.2.1.37) activities. Beta-1,4-xylosidases are part of…	pfam04616, Glyco_hydro_43, Glycosyl hydrolases family 43. The glycosyl hydrolase family 43 contains members that are arabinanases. Arabinanases hydrolyze the alpha-1,5-linked L-arabinofuranoside backbone of plant cell wall arabinans. The structure of arabinanase Arb43A from Cellvibrio japonicus reveals a five-bladed beta-propeller fold. A long V-shaped groove, partially enclosed at one end, forms…	-	KOG0440, KOG0440, KOG0440, Cell cycle-associated protein Mob1-1 [Cell cycle control, cell division, chromosome partitioning]. 6.63e-24	sp|A7LXT8|GH43A_BACO1 Non-reducing end alpha-L-arabinofuranosidase BoGH43A OS=Bacteroides ovatus (strain ATCC 8483 / DSM 1896 / JCM 5824 / NCTC 11153) GN=BACOVA_02654 PE=1 SV=1 2.99e-62	-	VEN63475.1 unnamed protein product [Callosobruchus maculatus] 3.11e-46	-
TRINITY_DN13650_c3_g2	0.0225905	0.461053	1.89578	-0.826241	-0.848949	-1.47423	1.14791	0.427999	-0.805908	1	cd01425, RPS2, Ribosomal protein S2 (RPS2), involved in formation of the translation initiation complex, where it might contact the messenger RNA and several components of the ribosome. It has been shown that in Escherichia coli RPS2 is essential for the binding of ribosomal protein S1 to the 30s ribosomal subunit. In humans, most likely in all vertebrates, and perhaps in all metazoans, the prote…	pfam00318, Ribosomal_S2, Ribosomal protein S2. 1.24e-09	K02998-ko03010 Ribosome	KOG0830, KOG0830, KOG0830, 40S ribosomal protein SA (P40)/Laminin receptor 1 [Translation, ribosomal structure and biogenesis]. 1.14e-86	sp|C7Z0Q8|RSSA_NECH7 40S ribosomal protein S0 OS=Nectria haematococca (strain 77-13-4 / ATCC MYA-4622 / FGSC 9596 / MPVI) GN=RPS0 PE=3 SV=1 2.96e-156	GO:0000028, ribosomal small subunit assembly;GO:0000447, endonucleolytic cleavage in ITS1 to separate SSU-rRNA from 5.8S rRNA and LSU-rRNA from tricistronic rRNA transcript (SSU-rRNA, 5.8S rRNA, LSU-rRNA);GO:0000460, maturation of 5.8S rRNA;GO:0000461, endonucleolytic cleavage to generate mature 3'-end of SSU-rRNA from (SSU-rRNA, 5.8S rRNA, LSU-rRNA);GO:0000462, maturation of SSU-rRNA from tricis…	KAJ3013588.1 structural constituent of ribosome [Siphonaria sp. JEL0065] 2.75e-104	Allophyes oxyacanthae genome assembly, chromosome: 10 9.23e-23
TRINITY_DN13674_c0_g1	0.851766	0.848013	1.4921	-1.17164	-1.28042	-1.16945	1.47661	-0.124637	-0.922351	1	-	-	-	-	-	-	-	-
TRINITY_DN13692_c0_g1	1.42365	1.469	1.05163	0.0290033	-0.742973	-0.422119	-0.448219	-1.30951	-1.05047	1	-	pfam03663, Glyco_hydro_76, Glycosyl hydrolase family 76. Family of alpha-1,6-mannanases. 1.27e-34	-	-	sp|P36091|DCW1_YEAST Mannan endo-1,6-alpha-mannosidase DCW1 OS=Saccharomyces cerevisiae (strain ATCC 204508 / S288c) GN=DCW1 PE=1 SV=1 6.91e-58	-	CAF3428153.1 unnamed protein product [Rotaria socialis] >CAF4783014.1 unnamed protein product [Rotaria socialis] 2.09e-46	-
TRINITY_DN13698_c3_g6	0.797456	1.08436	1.69308	-0.314529	-2.09129	-0.727008	0.367234	-0.0697351	-0.739571	1	-	-	-	KOG0048, KOG0048, KOG0048, Transcription factor, Myb superfamily [Transcription]. 6.81e-13	sp|O13493|MYB1_NEUCR Myb-like DNA-binding protein myb-1 OS=Neurospora crassa (strain ATCC 24698 / 74-OR23-1A / CBS 708.71 / DSM 1257 / FGSC 987) GN=rca-1 PE=3 SV=2 2.81e-31	GO:0000278, mitotic cell cycle;GO:0000981, RNA polymerase II transcription factor activity, sequence-specific DNA binding;GO:0000988, transcription factor activity, protein binding;GO:0000989, transcription factor activity, transcription factor binding;GO:0001067, regulatory region nucleic acid binding;GO:0001076, transcription factor activity, RNA polymerase II transcription factor binding;GO:00…	XP_009046770.1 hypothetical protein LOTGIDRAFT_88057, partial [Lottia gigantea] >ESP02554.1 hypothetical protein LOTGIDRAFT_88057, partial [Lottia gigantea] 1.75e-18	-
TRINITY_DN13713_c0_g1	0.386072	0.659594	2.09054	-0.38158	-1.53284	-1.19513	0.509102	-0.282989	-0.252769	1	cd19117, AKR_AKR3A1-2, AKR3A family of aldo-keto reductase (AKR). Saccharomyces cerevisiae Gcy1p and Ypr1p are founding members of aldo-keto reductase family 3 member A1 (AKR3A1) and A2 (AKR3A2), respectively. Gcy1p, also called galactose-inducible crystallin-like protein 1, is a glycerol dehydrogenase involved in glycerol catabolism under microaerobic conditions. It has mRNA binding activity. Yp…	pfam03055, RPE65, Retinal pigment epithelial membrane protein. This family represents a retinal pigment epithelial membrane receptor which is abundantly expressed in retinal pigment epithelium, and binds plasma retinal binding protein. The family also includes the sequence related neoxanthin cleavage enzyme in plants and lignostilbene-alpha,beta-dioxygenase in bacteria. 2.30e-25	K18097-ko00561 Glycerolipid metabolism	KOG1577, KOG1577, KOG1577, Aldo/keto reductase family proteins [General function prediction only]. 1.22e-71	sp|Q53353|LSDX1_SPHPI Lignostilbene-alpha,beta-dioxygenase isozyme I OS=Sphingomonas paucimobilis PE=1 SV=1 1.60e-83	-	XP_046808046.1 aldo-keto reductase family 1 member B1-like isoform X2 [Lucilia cuprina] >XP_046808048.1 aldo-keto reductase family 1 member B1-like isoform X2 [Lucilia cuprina] 2.20e-64	-
TRINITY_DN13719_c2_g3	0.971576	0.991632	1.34437	-1.0964	-1.54047	-1.24076	0.871516	0.138272	-0.439737	1	cd06179, MFS_TRI12_like, Fungal trichothecene efflux pump (TRI12) of the Major Facilitator Superfamily of transporters. This family includes Fusarium sporotrichioides trichothecene efflux pump (TRI12), which may play a role in F. sporotrichioides self-protection against trichothecenes. TRI12 belongs to the Major Facilitator Superfamily (MFS) of membrane transport proteins, which are thought to fu…	pfam06609, TRI12, Fungal trichothecene efflux pump (TRI12). This family consists of several fungal specific trichothecene efflux pump proteins. Many of the genes involved in trichothecene toxin biosynthesis in Fusarium sporotrichioides are present within a gene cluster.It has been suggested that TRI12 may play a role in F. sporotrichioides self-protection against trichothecenes. 3.25e-08	-	-	sp|Q9HE13|YI32_SCHPO Uncharacterized MFS-type transporter C1399.02 OS=Schizosaccharomyces pombe (strain 972 / ATCC 24843) GN=SPAC1399.02 PE=3 SV=1 1.47e-38	-	KAJ3010587.1 hypothetical protein HDU68_002075 [Siphonaria sp. JEL0065] 8.32e-46	-
TRINITY_DN13721_c0_g1	0.414846	0.655633	1.24791	-0.666002	-1.20367	-1.23082	0.999073	-0.074461	-0.142507	1	cd00926, Cyt_c_Oxidase_VIb, Cytochrome c oxidase subunit VIb. Cytochrome c oxidase (CcO), the terminal oxidase in the respiratory chains of eukaryotes and most bacteria, is a multi-chain transmembrane protein located in the inner membrane of mitochondria and the cell membrane of prokaryotes. It catalyzes the reduction of O2 and simultaneously pumps protons across the membrane. The number of subun…	pfam13019, Telomere_Sde2, Telomere stability and silencing. Sde2 has been identified in fission yeast as an important factor in telomere formation and maintenance. This is a more N-terminal domain on these nuclear proteins, and is essential for telomeric silencing and genomic stability. 1.48e-43	-	KOG3057, KOG3057, KOG3057, Cytochrome c oxidase, subunit VIb/COX12 [Energy production and conversion]. 5.63e-28	sp|O94581|COX12_SCHPO Cytochrome c oxidase subunit 6B OS=Schizosaccharomyces pombe (strain 972 / ATCC 24843) GN=cox12 PE=3 SV=2 1.96e-29	GO:0000375, RNA splicing, via transesterification reactions;GO:0000377, RNA splicing, via transesterification reactions with bulged adenosine as nucleophile;GO:0000398, mRNA splicing, via spliceosome;GO:0005575, cellular_component;GO:0005622, intracellular;GO:0005623, cell;GO:0005634, nucleus;GO:0005681, spliceosomal complex;GO:0005737, cytoplasm;GO:0006139, nucleobase-containing compound metabol…	XP_009013960.1 hypothetical protein HELRODRAFT_75683 [Helobdella robusta] >ESO08171.1 hypothetical protein HELRODRAFT_75683 [Helobdella robusta] 3.62e-27	-
TRINITY_DN13722_c0_g1	0.746059	0.924641	0.548959	-0.619855	-1.39072	-0.961738	-0.179208	0.216218	0.715645	1	cd20513, CYCLIN_CCNC_rpt1, first cyclin box found in cyclin-C (CCNC) and similar proteins. CCNC, also termed CycC, or SRB11, is a component of the Mediator complex, a coactivator involved in regulated gene transcription of nearly all RNA polymerase II-dependent genes. It mediates stress-induced mitochondrial fission and apoptosis. CCNC contains two cyclin boxes. This model corresponds to the firs…	pfam14618, DUF4452, Domain of unknown function (DUF4452). This fungal family has no known function. However, it is rich in paired, as CXXC, cysteines and histidines, but these do not fall in the conformation that might suggest zinc-binding. 8.37e-21	-	KOG0794, KOG0794, KOG0794, CDK8 kinase-activating protein cyclin C [Transcription]. 3.43e-32	sp|Q9C1M4|SSN8_GIBMO RNA polymerase II holoenzyme cyclin-like subunit OS=Gibberella moniliformis GN=SSN8 PE=1 SV=1 2.37e-91	GO:0000003, reproduction;GO:0000079, regulation of cyclin-dependent protein serine/threonine kinase activity;GO:0000122, negative regulation of transcription by RNA polymerase II;GO:0000307, cyclin-dependent protein kinase holoenzyme complex;GO:0000409, regulation of transcription by galactose;GO:0000411, positive regulation of transcription by galactose;GO:0000976, transcription regulatory regio…	XP_049849361.1 cyclin-C-like [Schistocerca gregaria] 2.40e-24	-
TRINITY_DN13727_c0_g1	0.612285	0.965129	0.928708	-0.108028	-0.764447	-0.623647	0.312092	-0.55009	-0.772004	1	cd17327, MFS_FEN2_like, Pantothenate transporter FEN2 and similar transporters of the Major Facilitator Superfamily. This family is composed of Saccharomyces cerevisiae pantothenate transporter FEN2 (or fenpropimorph resistance protein 2) and similar proteins from fungi and bacteria including fungal vitamin H transporter, allantoate permease, and high-affinity nicotinic acid transporter, as well …	pfam01425, Amidase, Amidase. 3.98e-31	-	KOG1212, KOG1212, KOG1212, Amidases [Translation, ribosomal structure and biogenesis, Lipid transport and metabolism, Signal transduction mechanisms]. 8.36e-53	sp|O43000|LIZ1_SCHPO Pantothenate transporter liz1 OS=Schizosaccharomyces pombe (strain 972 / ATCC 24843) GN=liz1 PE=2 SV=2 4.26e-114	-	CAF3245646.1 unnamed protein product [Rotaria socialis] >CAF3334030.1 unnamed protein product [Rotaria socialis] >CAF3397339.1 unnamed protein product [Rotaria socialis] >CAF3540874.1 unnamed protein product [Rotaria socialis] >CAF4265605.1 unnamed protein product [Rotaria socialis] 3.55e-121	-
TRINITY_DN13731_c0_g1	0.900467	0.662659	2.04403	-0.96266	-1.10657	-0.862888	0.889756	-0.137648	-1.42715	1	cd17502, MFS_Azr1_MDR_like, Saccharomyces cerevisiae Azole resistance protein 1 (Azr1p), and similar multidrug resistance (MDR) transporters of the Major Facilitator Superfamily. This subfamily is composed of multidrug resistance (MDR) transporters including various Saccharomyces cerevisiae proteins such as azole resistance protein 1 (Azr1p), vacuolar basic amino acid transporter 1 (Vba1p), vacuo…	-	-	-	sp|Q10072|YAN6_SCHPO Uncharacterized transporter C3H1.06c OS=Schizosaccharomyces pombe (strain 972 / ATCC 24843) GN=SPAC3H1.06c PE=3 SV=1 8.07e-10	-	KAJ3016809.1 hypothetical protein HDU68_012013 [Siphonaria sp. JEL0065] 2.42e-10	-
TRINITY_DN13737_c0_g1	1.63333	1.90691	1.64446	-1.45662	-1.25827	-2.29381	0.358986	-0.0607786	-0.474206	1	-	pfam01822, WSC, WSC domain. This domain may be involved in carbohydrate binding. 1.59e-06	-	-	-	-	PAA74710.1 hypothetical protein BOX15_Mlig013306g3, partial [Macrostomum lignano] >PAA89196.1 hypothetical protein BOX15_Mlig013306g1, partial [Macrostomum lignano] 1.30e-06	-
TRINITY_DN13740_c0_g2	0.875706	0.525039	1.52812	-0.841509	-0.75891	-1.2021	0.994503	-0.142264	-0.978593	1	cd02569, PseudoU_synth_ScPus3, Pseudouridine synthase, Saccharomyces cerevisiae Pus3 like. This group consists of eukaryotic pseudouridine synthases similar to S. cerevisiae Pus3p, mouse Pus3p and, human PUS2. Pseudouridine synthases catalyze the isomerization of specific uridines in an RNA molecule to pseudouridines (5-ribosyluracil, psi). No cofactors are required. S. cerevisiae Pus3p makes psi…	pfam10181, PIG-H, GPI-GlcNAc transferase complex, PIG-H component. PIG-H is a family of conserved proteins that complexes with three other proteins to form the GPI-GnT (glycosylphosphatidylinositol anchor biosynthesis transferase) complex. It appears to be a peripheral membrane protein facing the cytoplasm involved in the first step in GPI anchor formation. 1.25e-12	-	KOG2554, KOG2554, KOG2554, Pseudouridylate synthase [Translation, ribosomal structure and biogenesis]. 2.31e-66	sp|Q3SX07|PUS3_BOVIN tRNA pseudouridine(38/39) synthase OS=Bos taurus GN=PUS3 PE=2 SV=1 2.97e-63	GO:0001522, pseudouridine synthesis;GO:0003674, molecular_function;GO:0003824, catalytic activity;GO:0005575, cellular_component;GO:0005622, intracellular;GO:0005623, cell;GO:0005634, nucleus;GO:0005737, cytoplasm;GO:0006139, nucleobase-containing compound metabolic process;GO:0006396, RNA processing;GO:0006399, tRNA metabolic process;GO:0006400, tRNA modification;GO:0006725, cellular aromatic co…	XP_006140672.1 tRNA pseudouridine(38/39) synthase isoform X3 [Tupaia chinensis] 4.35e-63	-
TRINITY_DN13741_c3_g6	0.517085	1.0529	1.23715	-0.744229	-0.876409	-1.07759	0.907027	-0.149472	-0.866469	1	cd01741, GATase1_1, Subgroup of proteins having the Type 1 glutamine amidotransferase (GATase1) domain. This group contains a subgroup of proteins having the Type 1 glutamine amidotransferase (GATase1) domain. GATase activity catalyses the transfer of ammonia from the amide side chain of glutamine to an acceptor substrate. Glutamine amidotransferases (GATase) includes the triad family of amidotra…	-	-	KOG3179, KOG3179, KOG3179, Predicted glutamine synthetase [Nucleotide transport and metabolism]. 7.10e-23	sp|Q09686|YA14_SCHPO Putative glutamine amidotransferase-like protein C13C5.04 OS=Schizosaccharomyces pombe (strain 972 / ATCC 24843) GN=SPAC13C5.04 PE=3 SV=1 3.76e-32	GO:0003674, molecular_function;GO:0003824, catalytic activity;GO:0005575, cellular_component;GO:0005622, intracellular;GO:0005623, cell;GO:0005634, nucleus;GO:0005737, cytoplasm;GO:0006873, cellular ion homeostasis;GO:0006875, cellular metal ion homeostasis;GO:0006878, cellular copper ion homeostasis;GO:0006879, cellular iron ion homeostasis;GO:0008150, biological_process;GO:0009987, cellular pro…	KAJ3025938.1 hypothetical protein HDU68_006437 [Siphonaria sp. JEL0065] 1.10e-20	-
TRINITY_DN13748_c2_g7	0.735495	0.774201	1.38759	-1.12717	-1.49757	-0.267064	0.752126	-0.429817	-0.327801	1	-	-	-	-	-	-	XP_041092726.1 capping protein, Arp2/3 and myosin-I linker protein 3 isoform X3 [Polyodon spathula] 1.72e-06	-
TRINITY_DN13750_c0_g1	1.59881	2.05013	2.30832	-1.52079	-1.4891	-2.24467	0.00552377	-0.265057	-0.443174	1	-	pfam01915, Glyco_hydro_3_C, Glycosyl hydrolase family 3 C-terminal domain. This domain is involved in catalysis and may be involved in binding beta-glucan. This domain is found associated with pfam00933. 1.35e-26	-	-	sp|Q5BFG8|BGLB_EMENI Beta-glucosidase B OS=Emericella nidulans (strain FGSC A4 / ATCC 38163 / CBS 112.46 / NRRL 194 / M139) GN=bglB PE=1 SV=1 3.36e-83	-	MCL4141981.1 hypothetical protein [Idotea baltica] 9.67e-42	-
TRINITY_DN13759_c0_g5	1.39692	1.74531	2.11474	-1.51667	-1.21047	-1.2785	0.0797933	-0.183993	-1.14714	1	-	pfam04388, Hamartin, Hamartin protein. This family includes the hamartin protein which is thought to function as a tumor suppressor. The hamartin protein interacts with the tuberin protein pfam03542. Tuberous sclerosis complex (TSC) is an autosomal dominant disorder and is characterized by the presence of hamartomas in many organs, such as brain, skin, heart, lung, and kidney. It is caused by mut…	-	-	sp|Q09778|TSC1_SCHPO Tuberous sclerosis 1 protein homolog OS=Schizosaccharomyces pombe (strain 972 / ATCC 24843) GN=tsc1 PE=1 SV=1 6.17e-19	GO:0005575, cellular_component;GO:0005622, intracellular;GO:0005623, cell;GO:0005737, cytoplasm;GO:0005829, cytosol;GO:0007346, regulation of mitotic cell cycle;GO:0008150, biological_process;GO:0009966, regulation of signal transduction;GO:0009968, negative regulation of signal transduction;GO:0010564, regulation of cell cycle process;GO:0010646, regulation of cell communication;GO:0010648, nega…	XP_039252160.1 hamartin-like [Styela clava] 2.11e-08	-
TRINITY_DN13768_c2_g3	0.130214	0.166079	1.11087	-1.09965	-1.24782	-0.692773	0.244189	0.527567	0.861324	1	-	-	-	-	sp|D4AS41|A7056_ARTBC Uncharacterized FAD-linked oxidoreductase ARB_02478 OS=Arthroderma benhamiae (strain ATCC MYA-4681 / CBS 112371) GN=ARB_07056 PE=1 SV=2 1.18e-78	-	CAF1052714.1 unnamed protein product [Didymodactylos carnosus] >CAF1204979.1 unnamed protein product [Didymodactylos carnosus] >CAF3819371.1 unnamed protein product [Didymodactylos carnosus] >CAF3969335.1 unnamed protein product [Didymodactylos carnosus] 1.04e-84	-
TRINITY_DN13781_c0_g2	1.17112	0.805702	1.18583	0.12443	-0.669336	-0.324353	-0.655937	-0.818727	-0.818727	1	cd17327, MFS_FEN2_like, Pantothenate transporter FEN2 and similar transporters of the Major Facilitator Superfamily. This family is composed of Saccharomyces cerevisiae pantothenate transporter FEN2 (or fenpropimorph resistance protein 2) and similar proteins from fungi and bacteria including fungal vitamin H transporter, allantoate permease, and high-affinity nicotinic acid transporter, as well …	-	-	KOG2533, KOG2533, KOG2533, Permease of the major facilitator superfamily [Carbohydrate transport and metabolism]. 1.19e-32	sp|P40445|YIQ6_YEAST Uncharacterized transporter YIL166C OS=Saccharomyces cerevisiae (strain ATCC 204508 / S288c) GN=YIL166C PE=1 SV=1 8.82e-40	-	CAF2752080.1 unnamed protein product [Rotaria sp. Silwood2] >CAF2909301.1 unnamed protein product [Rotaria sp. Silwood2] >CAF3301913.1 unnamed protein product [Rotaria sp. Silwood2] >CAF4071427.1 unnamed protein product [Rotaria sp. Silwood2] >CAF4164566.1 unnamed protein product [Rotaria sp. Silwood2] 3.17e-54	-
TRINITY_DN13798_c2_g1	0.721169	1.0292	1.67411	-0.788887	-1.3198	-1.02087	0.743177	-0.015267	-1.02284	1	-	-	-	-	-	-	CAF1402541.1 unnamed protein product [Adineta ricciae] 4.45e-17	-
TRINITY_DN13800_c0_g3	0.300864	1.18112	1.10833	-0.523839	-2.40436	-1.25036	1.34775	0.813484	-0.572992	1	cd00897, UGPase_euk, Eukaryotic UGPase catalyses the synthesis of UDP-Glucose. UGPase (UDP-Glucose Pyrophosphorylase) catalyzes the reversible production of UDP-Glucose and pyrophosphate (PPi) from Glucose-1-phosphate and UTP. UDP-glucose plays pivotal roles in galactose utilization, in glycogen synthesis, and in the synthesis of the carbohydrate moieties of glycolipids, glycoproteins, and proteo…	pfam01704, UDPGP, UTP--glucose-1-phosphate uridylyltransferase. This family consists of UTP--glucose-1-phosphate uridylyltransferases, EC:2.7.7.9. Also known as UDP-glucose pyrophosphorylase (UDPGP) and Glucose-1-phosphate uridylyltransferase. UTP--glucose-1-phosphate uridylyltransferase catalyzes the interconversion of MgUTP + glucose-1-phosphate and UDP-glucose + MgPPi. UDP-glucose is an import…	K00963-ko00040 Pentose and glucuronate interconversions;ko00500 Starch and sucrose metabolism;ko00052 Galactose metabolism;ko00520 Amino sugar and nucleotide sugar metabolism	KOG2638, KOG2638, KOG2638, UDP-glucose pyrophosphorylase [Carbohydrate transport and metabolism]. 0.0	sp|P78811|UGPA1_SCHPO Probable UTP--glucose-1-phosphate uridylyltransferase OS=Schizosaccharomyces pombe (strain 972 / ATCC 24843) GN=fyu1 PE=1 SV=2 0.0	GO:0000271, polysaccharide biosynthetic process;GO:0003674, molecular_function;GO:0003824, catalytic activity;GO:0003983, UTP:glucose-1-phosphate uridylyltransferase activity;GO:0005575, cellular_component;GO:0005618, cell wall;GO:0005622, intracellular;GO:0005623, cell;GO:0005737, cytoplasm;GO:0005886, plasma membrane;GO:0005975, carbohydrate metabolic process;GO:0005976, polysaccharide metaboli…	KAJ3019311.1 UTP-glucose-1-phosphate uridylyltransferase [Siphonaria sp. JEL0065] 4.03e-200	-
TRINITY_DN13800_c0_g8	1.19389	1.23847	1.22119	0.00833963	-0.646679	-0.874316	-0.76886	-0.939135	-0.432902	1	-	pfam13883, Pyrid_oxidase_2, Pyridoxamine 5'-phosphate oxidase. 7.04e-12	-	-	-	-	-	-
TRINITY_DN13809_c1_g1	0.369428	0.948663	1.28445	-1.24229	-1.47453	-1.31262	-0.0927568	0.560012	0.959652	1	-	-	-	-	-	-	-	-
TRINITY_DN13819_c0_g1	1.42499	1.52481	0.880143	-0.634982	-0.662509	-1.05176	-0.0316233	-0.788005	-0.661059	1	-	pfam01425, Amidase, Amidase. 1.11e-07	-	KOG3923, KOG3923, KOG3923, D-aspartate oxidase [Amino acid transport and metabolism]. 1.71e-33	sp|Q9Y7N4|OXDA_SCHPO D-amino-acid oxidase OS=Schizosaccharomyces pombe (strain 972 / ATCC 24843) GN=dao1 PE=3 SV=1 5.28e-64	-	CAB4010832.1 Hypothetical predicted protein, partial [Paramuricea clavata] 5.23e-67	-
TRINITY_DN13822_c2_g1	0.40519	0.496717	1.50748	-1.00696	-0.996239	-0.745933	1.48779	0.0159668	-1.16401	1	cd08864, SRPBCC_DUF3074, DUF3074, an uncharacterized ligand-binding domain of the SRPBCC domain superfamily. Uncharacterized family of the SRPBCC (START/RHO_alpha_C/PITP/Bet_v1/CoxG/CalC) domain superfamily. SRPBCC domains have a deep hydrophobic ligand-binding pocket and they bind diverse ligands. SRPBCC domains include the steroidogenic acute regulatory protein (StAR)-related lipid transfer (ST…	pfam10637, Ofd1_CTDD, Oxoglutarate and iron-dependent oxygenase degradation C-term. Ofd1 is a prolyl 4-hydroxylase-like 2-oxoglutarate-Fe(II) dioxygenase that accelerates the degradation of Sre1N in the presence of oxygen. The domain is conserved from yeasts to humans. Yeast Sre1 is the orthologue of mammalian sterol regulatory element binding protein (SREBP), and it responds to changes in oxygen…	-	KOG3844, KOG3844, KOG3844, Predicted component of NuA3 histone acetyltransferase complex [Chromatin structure and dynamics]. 3.79e-06	sp|Q11120|OFD1_SCHPO Prolyl 3,4-dihydroxylase ofd1 OS=Schizosaccharomyces pombe (strain 972 / ATCC 24843) GN=ofd1 PE=1 SV=1 5.47e-13	-	-	-
TRINITY_DN13829_c0_g1	0.227814	0.479785	1.07706	-0.979745	-0.695313	-1.32135	1.44783	0.405945	-0.642028	1	sd00010, SLR, Sel1-like repeat. Sel1-like repeats (SLRs) share similar alpha-helical conformations with Tetratricopeptide repeats (TPRs), but with different consensus sequence lengths and superhelical topologies. SLRs contain 36 to 44 amino acids and are present in bacteria and eukaryotes but not in archaea. SLR proteins are involved in a variety of functions, and many serve as adaptor proteins f…	-	-	KOG1550, KOG1550, KOG1550, Extracellular protein SEL-1 and related proteins [Cell wall/membrane/envelope biogenesis, Posttranslational modification, protein turnover, chaperones, Signal transduction mechanisms]. 2.10e-12	sp|P34226|SKT5_YEAST Protein SKT5 OS=Saccharomyces cerevisiae (strain ATCC 204508 / S288c) GN=SKT5 PE=1 SV=1 4.67e-77	GO:0000003, reproduction;GO:0000131, incipient cellular bud site;GO:0000271, polysaccharide biosynthetic process;GO:0003006, developmental process involved in reproduction;GO:0003674, molecular_function;GO:0005575, cellular_component;GO:0005622, intracellular;GO:0005623, cell;GO:0005628, prospore membrane;GO:0005933, cellular bud;GO:0005935, cellular bud neck;GO:0005975, carbohydrate metabolic pr…	KAJ3018359.1 hypothetical protein HDU68_011203 [Siphonaria sp. JEL0065] 1.02e-66	-
TRINITY_DN13841_c3_g2	1.53078	1.63959	1.44501	-0.274606	-1.26814	-0.81123	-0.417443	-1.09114	-0.752813	1	-	pfam18922, DUF5672, Protein of unknown function (DUF5672). This family of proteins is functionally uncharacterized. This family of proteins is found in bacteria, archaea, eukaryotes and viruses. Proteins in this family are typically between 260 and 408 amino acids in length. This entry corresponds to a region of about 200 amino acids in length with multiple conserved motifs. There are two conserv…	-	-	-	-	CAF1137194.1 unnamed protein product [Rotaria magnacalcarata] >CAF1564152.1 unnamed protein product [Rotaria magnacalcarata] >CAF2078053.1 unnamed protein product [Rotaria magnacalcarata] >CAF4886345.1 unnamed protein product [Rotaria magnacalcarata] >CAF4965693.1 unnamed protein product [Rotaria magnacalcarata] 6.59e-20	-
TRINITY_DN13843_c3_g2	0.344574	0.468303	1.1837	-0.984838	-0.727162	-1.28518	1.05916	0.244582	-0.303134	1	-	pfam09511, RNA_lig_T4_1, RNA ligase. Members of this family include T4 phage proteins with ATP-dependent RNA ligase activity. Host defense to phage may include cleavage and inactivation of specific tRNA molecules; members of this family act to reverse this RNA damage. The enzyme is adenylated, transiently, on a Lys residue in a motif KXDGSL. This family also includes fungal tRNA ligases that have…	-	KOG1438, KOG1438, KOG1438, Anthranilate phosphoribosyltransferase [Amino acid transport and metabolism]. 2.16e-49	sp|Q10313|TRNL_SCHPO tRNA ligase 1 OS=Schizosaccharomyces pombe (strain 972 / ATCC 24843) GN=trl1 PE=3 SV=2 5.32e-148	GO:0000394, RNA splicing, via endonucleolytic cleavage and ligation;GO:0003674, molecular_function;GO:0003824, catalytic activity;GO:0003972, RNA ligase (ATP) activity;GO:0004112, cyclic-nucleotide phosphodiesterase activity;GO:0004113, 2',3'-cyclic-nucleotide 3'-phosphodiesterase activity;GO:0005575, cellular_component;GO:0005622, intracellular;GO:0005623, cell;GO:0005634, nucleus;GO:0005635, nu…	AQT27239.1 putative anthranilate phosphoribosyltransferase, partial [Nilaparvata lugens] 1.06e-108	-
TRINITY_DN13847_c1_g1	1.87872	1.69806	1.81416	-0.649648	-1.56326	-0.88902	-0.170069	-0.955084	-1.16386	1	cd08930, SDR_c8, classical (c) SDR, subgroup 8. This subgroup has a fairly well conserved active site tetrad and domain size of the classical SDRs, but has an atypical NAD-binding motif ([ST]G[GA]XGXXG). SDRs are a functionally diverse family of oxidoreductases that have a single domain with a structurally conserved Rossmann fold (alpha/beta folding pattern with a central beta-sheet), an NAD(P)(H…	pfam00106, adh_short, short chain dehydrogenase. This family contains a wide variety of dehydrogenases. 2.48e-20	-	KOG0725, KOG0725, KOG0725, Reductases with broad range of substrate specificities [General function prediction only]. 4.01e-15	sp|Q8KWT4|BACC_BACIU Dihydroanticapsin 7-dehydrogenase OS=Bacillus subtilis GN=bacC PE=1 SV=1 1.16e-15	-	CAF1483387.1 unnamed protein product [Adineta steineri] 1.25e-42	-
TRINITY_DN13849_c4_g3	0.457085	0.880577	1.5556	-0.58475	-1.85673	-1.23435	0.879092	0.0598792	-0.156406	1	-	pfam05047, L51_S25_CI-B8, Mitochondrial ribosomal protein L51 / S25 / CI-B8 domain. The proteins in this family are located in the mitochondrion. The family includes ribosomal protein L51, and S25. This family also includes mitochondrial NADH-ubiquinone oxidoreductase B8 subunit (CI-B8) EC:1.6.5.3. It is not known whether all members of this family form part of the NADH-ubiquinone oxidoreductase …	K03946-ko00190 Oxidative phosphorylation	KOG3446, KOG3446, KOG3446, NADH:ubiquinone oxidoreductase NDUFA2/B8 subunit [Energy production and conversion]. 5.59e-08	sp|Q07842|NDUA2_NEUCR NADH-ubiquinone oxidoreductase 10.5 kDa subunit OS=Neurospora crassa (strain ATCC 24698 / 74-OR23-1A / CBS 708.71 / DSM 1257 / FGSC 987) GN=nuo-10.5 PE=4 SV=1 1.48e-32	GO:0003674, molecular_function;GO:0003824, catalytic activity;GO:0003954, NADH dehydrogenase activity;GO:0005575, cellular_component;GO:0005622, intracellular;GO:0005623, cell;GO:0005737, cytoplasm;GO:0005739, mitochondrion;GO:0005740, mitochondrial envelope;GO:0005743, mitochondrial inner membrane;GO:0005746, mitochondrial respiratory chain;GO:0005747, mitochondrial respiratory chain complex I;G…	MCL4128054.1 hypothetical protein [Idotea baltica] 1.01e-08	-
TRINITY_DN13851_c0_g1	1.6102	1.46369	1.37188	-0.590424	-1.00173	-0.693782	-0.396331	-0.82987	-0.933628	1	-	-	-	-	-	-	-	-
TRINITY_DN13865_c6_g1	0.613285	0.705169	1.57832	-0.785591	-0.860881	-1.25171	1.09598	-0.283962	-0.810609	1	-	-	-	-	-	GO:0000313, organellar ribosome;GO:0000314, organellar small ribosomal subunit;GO:0003674, molecular_function;GO:0003735, structural constituent of ribosome;GO:0005198, structural molecule activity;GO:0005575, cellular_component;GO:0005622, intracellular;GO:0005623, cell;GO:0005737, cytoplasm;GO:0005739, mitochondrion;GO:0005759, mitochondrial matrix;GO:0005761, mitochondrial ribosome;GO:0005763,…	-	-
TRINITY_DN13872_c0_g1	1.12101	1.08989	0.948366	-0.157664	-0.905214	-0.211905	-0.346631	-0.733895	-0.803952	1	sd00045, ANK, ankyrin repeats. Ankyrin repeats are one of the most abundant repeat motifs, and generally function as scaffolds for protein-protein interactions in processes including cell cycle, transcriptional regulation, signal transduction, vesicular trafficking, and inflammatory response. Although predominantly found in eukaryotic proteins, they are also found in some bacterial and viral prot…	-	-	KOG4177, KOG4177, KOG4177, Ankyrin [Cell wall/membrane/envelope biogenesis]. 4.14e-06	sp|Q5UPF8|YL088_MIMIV Putative ankyrin repeat protein L88 OS=Acanthamoeba polyphaga mimivirus GN=MIMI_L88 PE=3 SV=1 4.10e-19	-	XP_046547141.1 putative ankyrin repeat protein RF_0381 [Haliotis rubra] 1.22e-14	-
TRINITY_DN13874_c0_g2	0.986449	1.32164	1.13746	-0.744924	-1.1651	-1.24278	0.590944	-0.166758	-0.716927	1	cd16464, RING-H2_Pirh2, RING finger, H2 subclass, found in p53-induced RING-H2 protein (Pirh2) and similar proteins. Pirh2, also known as RING finger and CHY zinc finger domain-containing protein 1 (Rchy1), androgen receptor N-terminal-interacting protein, CH-rich-interacting match with PLAG1, RING finger protein 199 (RNF199), or zinc finger protein 363 (ZNF363), is a p53 inducible E3 ubiquitin-p…	pfam05495, zf-CHY, CHY zinc finger. This family of domains are likely to bind to zinc ions. They contain many conserved cysteine and histidine residues. We have named this domain after the N-terminal motif CXHY. This domain can be found in isolation in some proteins, but is also often associated with pfam00097. One of the proteins in this family is a mitochondrial intermembrane space protein call…	-	KOG1940, KOG1940, KOG1940, Zn-finger protein [General function prediction only]. 5.21e-60	sp|O14099|YERG_SCHPO Uncharacterized RING finger protein C2F3.16 OS=Schizosaccharomyces pombe (strain 972 / ATCC 24843) GN=SPAC2F3.16 PE=3 SV=1 5.79e-79	GO:0003674, molecular_function;GO:0003824, catalytic activity;GO:0004842, ubiquitin-protein transferase activity;GO:0005488, binding;GO:0005575, cellular_component;GO:0005622, intracellular;GO:0005623, cell;GO:0005634, nucleus;GO:0006464, cellular protein modification process;GO:0006508, proteolysis;GO:0006511, ubiquitin-dependent protein catabolic process;GO:0006807, nitrogen compound metabolic …	KAJ3019272.1 hypothetical protein HDU68_010739 [Siphonaria sp. JEL0065] 2.50e-75	-
TRINITY_DN13883_c0_g1	1.31953	1.13208	0.948859	0.218648	-1.09448	-0.117146	-0.862802	-0.401839	-1.14285	1	cd05918, A_NRPS_SidN3_like, The adenylation (A) domain of siderophore-synthesizing nonribosomal peptide synthetases (NRPS). The adenylation (A) domain of NRPS recognizes a specific amino acid or hydroxy acid and activates it as an (amino) acyl adenylate by hydrolysis of ATP. The activated acyl moiety then forms a thioester to the enzyme-bound cofactor phosphopantetheine of a peptidyl carrier prot…	pfam00501, AMP-binding, AMP-binding enzyme. 1.42e-20	-	KOG1178, KOG1178, KOG1178, Non-ribosomal peptide synthetase/alpha-aminoadipate reductase and related enzymes [Secondary metabolites biosynthesis, transport and catabolism]. 2.33e-11	sp|Q4WVN4|NRPS8_ASPFU Nonribosomal peptide synthetase 8 OS=Neosartorya fumigata (strain ATCC MYA-4609 / Af293 / CBS 101355 / FGSC A1100) GN=NRPS8 PE=3 SV=1 5.22e-08	GO:0008150, biological_process;GO:0008152, metabolic process;GO:0019748, secondary metabolic process	XP_031624485.1 uncharacterized protein LOC116341514 [Contarinia nasturtii] 0.0	-
TRINITY_DN13893_c0_g1	1.27346	1.87636	0.947698	-0.448412	-0.885942	-0.425799	-0.371648	-0.841951	-1.12376	1	cd02872, GH18_chitolectin_chitotriosidase, This conserved domain family includes a large number of catalytically inactive chitinase-like lectins (chitolectins) including YKL-39, YKL-40 (HCGP39), YM1, oviductin, and AMCase (acidic mammalian chitinase), as well as catalytically active chitotriosidases. The conserved domain is an eight-stranded alpha/beta barrel fold belonging to the family 18 glyco…	pfam00704, Glyco_hydro_18, Glycosyl hydrolases family 18. 1.28e-35	K01183-ko00520 Amino sugar and nucleotide sugar metabolism	KOG2806, KOG2806, KOG2806, Chitinase [Carbohydrate transport and metabolism]. 6.57e-15	sp|P09805|KTXA_KLULA Killer toxin subunits alpha/beta OS=Kluyveromyces lactis (strain ATCC 8585 / CBS 2359 / DSM 70799 / NBRC 1267 / NRRL Y-1140 / WM37) PE=1 SV=1 2.95e-37	-	CAF2685818.1 unnamed protein product [Rotaria sp. Silwood2] >CAF3094001.1 unnamed protein product [Rotaria sp. Silwood2] >CAF4051720.1 unnamed protein product [Rotaria sp. Silwood2] >CAF4166201.1 unnamed protein product [Rotaria sp. Silwood2] 4.12e-97	-
TRINITY_DN13894_c3_g4	0.557489	0.986451	1.4593	-0.479411	-1.32496	-1.34706	0.958919	0.0355894	-0.846319	1	-	-	-	-	sp|Q12324|YVC1_YEAST Calcium channel YVC1 OS=Saccharomyces cerevisiae (strain ATCC 204508 / S288c) GN=YVC1 PE=1 SV=2 4.07e-13	-	-	-
TRINITY_DN13897_c0_g1	2.40428	1.85568	0.577961	0.113654	-1.2148	-0.783901	-1.16489	-1.46649	-0.321491	1	-	-	-	-	-	-	-	-
TRINITY_DN13901_c0_g3	1.29911	1.21442	1.25273	0.0330993	-1.29897	-0.283596	-0.476371	-0.480475	-1.25994	1	cd02183, GH16_fungal_CRH1_transglycosylase, glycosylphosphatidylinositol-glucanosyltransferase. Group of fungal GH16 members related to Saccharomyces cerevisiae Crh1p. Chr1p and Crh2p are transglycosylases that are required for the linkage of chitin to beta(1-3)glucose branches of beta(1-6)glucan, an important step in the assembly of new cell wall. Both have been shown to be glycosylphosphatidyli…	pfam00722, Glyco_hydro_16, Glycosyl hydrolases family 16. 1.74e-25	-	-	sp|Q8J0P4|CRF1_ASPFU Probable glycosidase crf1 OS=Neosartorya fumigata (strain ATCC MYA-4609 / Af293 / CBS 101355 / FGSC A1100) GN=crf1 PE=1 SV=2 2.01e-89	GO:0000131, incipient cellular bud site;GO:0003674, molecular_function;GO:0003824, catalytic activity;GO:0005488, binding;GO:0005575, cellular_component;GO:0005576, extracellular region;GO:0005618, cell wall;GO:0005622, intracellular;GO:0005623, cell;GO:0005886, plasma membrane;GO:0005975, carbohydrate metabolic process;GO:0005976, polysaccharide metabolic process;GO:0006022, aminoglycan metaboli…	KAJ3011378.1 hypothetical protein HDU68_001695 [Siphonaria sp. JEL0065] 5.76e-12	-
TRINITY_DN13919_c2_g6	0.218314	0.661745	1.72236	-1.12066	-1.04147	-1.21831	1.67695	0.351021	-1.24995	1	-	-	-	-	sp|Q9PPX7|RRF_UREPA Ribosome-recycling factor OS=Ureaplasma parvum serovar 3 (strain ATCC 700970) GN=frr PE=3 SV=1 1.69e-06	-	-	-
TRINITY_DN13929_c3_g4	1.04978	1.91365	1.9535	0.18565	-1.74224	-0.964918	-1.37267	-0.682379	-0.340376	1	-	-	-	-	-	-	-	-
TRINITY_DN13933_c1_g2	-0.192614	-0.22593	1.5139	-0.882028	-1.14836	-0.75084	1.49628	0.780682	-0.591089	1	-	-	-	KOG2132, KOG2132, KOG2132, Uncharacterized conserved protein, contains JmjC domain [Chromatin structure and dynamics, Signal transduction mechanisms]. 4.90e-11	sp|Q00808|HETE1_PODAS Vegetative incompatibility protein HET-E-1 OS=Podospora anserina GN=HET-E1 PE=3 SV=1 4.44e-50	-	OUC39983.1 putative JmjC domain protein [Trichinella nativa] 4.68e-13	-
TRINITY_DN13933_c1_g3	1.96881	1.90672	-0.357224	-0.685695	-0.359194	-1.03514	-0.904396	-0.598646	0.064761	1	-	-	-	-	-	-	-	-
TRINITY_DN13952_c2_g3	1.0914	0.986419	0.807348	-0.516295	-0.775892	-0.68798	0.312664	-0.441772	-0.775892	1	-	-	-	-	-	-	-	-
TRINITY_DN13952_c2_g6	1.51222	1.1998	1.05312	0.105511	-1.31227	-0.189272	-0.707004	-0.836621	-0.825486	1	-	-	-	-	-	-	-	-
TRINITY_DN13956_c1_g8	0.441832	0.727966	1.50324	-0.693543	-0.924981	-1.43173	0.792246	0.31521	-0.730233	1	cd01884, EF_Tu, Elongation Factor Tu (EF-Tu) GTP-binding proteins. EF-Tu subfamily. This subfamily includes orthologs of translation elongation factor EF-Tu in bacteria, mitochondria, and chloroplasts. It is one of several GTP-binding translation factors found in the larger family of GTP-binding elongation factors. The eukaryotic counterpart, eukaryotic translation elongation factor 1 (eEF-1 alph…	pfam00009, GTP_EFTU, Elongation factor Tu GTP binding domain. This domain contains a P-loop motif, also found in several other families such as pfam00071, pfam00025 and pfam00063. Elongation factor Tu consists of three structural domains, this plus two C-terminal beta barrel domains. 3.88e-31	-	KOG0460, KOG0460, KOG0460, Mitochondrial translation elongation factor Tu [Translation, ribosomal structure and biogenesis]. 6.80e-06	sp|P02992|EFTU_YEAST Elongation factor Tu, mitochondrial OS=Saccharomyces cerevisiae (strain ATCC 204508 / S288c) GN=TUF1 PE=1 SV=1 1.08e-174	GO:0000049, tRNA binding;GO:0000166, nucleotide binding;GO:0001882, nucleoside binding;GO:0001883, purine nucleoside binding;GO:0003674, molecular_function;GO:0003676, nucleic acid binding;GO:0003723, RNA binding;GO:0003746, translation elongation factor activity;GO:0003824, catalytic activity;GO:0003924, GTPase activity;GO:0005488, binding;GO:0005525, GTP binding;GO:0005575, cellular_component;G…	KAJ3022807.1 translation elongation factor Tu [Siphonaria sp. JEL0065] 1.15e-156	-
TRINITY_DN13969_c0_g1	0.947508	0.839814	1.0751	-0.771529	-0.904059	-0.985562	0.793964	-0.43302	-0.56222	1	cd12148, fungal_TF_MHR, fungal transcription factor regulatory middle homology region. This domain is present in the large family of fungal zinc cluster transcription factors that contain an N-terminal GAL4-like C6 zinc binuclear cluster DNA-binding domain. Examples of members of this large fungal group are the following Saccharomyces cerevisiae transcription factors, GAL4, STB5, DAL81, CAT8, RDR…	-	-	-	sp|P41890|SCN1_SCHPO Cut9-interacting protein scn1 OS=Schizosaccharomyces pombe (strain 972 / ATCC 24843) GN=scn1 PE=4 SV=2 3.46e-52	-	-	-
TRINITY_DN13970_c2_g2	0.732736	0.979278	1.58874	-0.326118	-1.64295	-0.830544	0.0563473	-0.207574	-0.349912	1	cd07564, nitrilases_CHs, Nitrilases, cyanide hydratase (CH)s, and similar proteins (class 1 nitrilases). Nitrilases (nitrile aminohydrolases, EC:3.5.5.1) hydrolyze nitriles (RCN) to ammonia and the corresponding carboxylic acid. Most nitrilases prefer aromatic nitriles, some prefer arylacetonitriles and others aliphatic nitriles. This group includes the nitrilase cyanide dihydratase (CDH), which …	pfam00795, CN_hydrolase, Carbon-nitrogen hydrolase. This family contains hydrolases that break carbon-nitrogen bonds. The family includes: Nitrilase EC:3.5.5.1, Aliphatic amidase EC:3.5.1.4, Biotidinase EC:3.5.1.12, Beta-ureidopropionase EC:3.5.1.6. Nitrilase-related proteins generally have a conserved E-K-C catalytic triad, and are multimeric alpha-beta-beta-alpha sandwich proteins. 1.96e-16	-	KOG0805, KOG0805, KOG0805, Carbon-nitrogen hydrolase [Amino acid transport and metabolism]. 2.69e-38	sp|Q03217|NRL2_RHORH Aliphatic nitrilase OS=Rhodococcus rhodochrous GN=nitA PE=1 SV=2 4.34e-46	-	CAF0985047.1 unnamed protein product [Rotaria sp. Silwood1] >CAF1278878.1 unnamed protein product [Rotaria sp. Silwood1] >CAF3547033.1 unnamed protein product [Rotaria sp. Silwood1] >CAF4825424.1 unnamed protein product [Rotaria sp. Silwood1] 1.12e-106	-
TRINITY_DN13982_c0_g1	2.07127	1.9246	1.0644	-1.34931	-0.107583	-1.15782	-0.910982	-0.904407	-0.630172	1	cd12453, RRM1_RIM4_like, RNA recognition motif 1 (RRM1) found in yeast meiotic activator RIM4 and similar proteins. This subfamily corresponds to the RRM1 of RIM4, also termed regulator of IME2 protein 4, a putative RNA binding protein that is expressed at elevated levels early in meiosis. It functions as a meiotic activator required for both the IME1- and IME2-dependent pathways of meiotic gene …	-	-	-	-	GO:0000003, reproduction;GO:0000280, nuclear division;GO:0003674, molecular_function;GO:0003676, nucleic acid binding;GO:0003723, RNA binding;GO:0005488, binding;GO:0005575, cellular_component;GO:0005622, intracellular;GO:0005623, cell;GO:0005737, cytoplasm;GO:0006139, nucleobase-containing compound metabolic process;GO:0006259, DNA metabolic process;GO:0006260, DNA replication;GO:0006261, DNA-de…	-	-
TRINITY_DN13983_c3_g1	0.653246	0.695164	1.38321	-1.09929	-0.795145	-1.11771	0.372016	0.185181	-0.276672	1	cd01408, SIRT1, SIRT1: Eukaryotic group (class1) which includes human sirtuins SIRT1-3 and yeast Hst1-4; and are members of the SIR2 family of proteins, silent information regulator 2 (Sir2) enzymes which catalyze NAD+-dependent protein/histone deacetylation. Sir2 proteins have been shown to regulate gene silencing, DNA repair, and life span. The most-studied function, gene silencing, involves th…	pfam02146, SIR2, Sir2 family. This region is characteristic of Silent information regulator 2 (Sir2) proteins, or sirtuins. These are protein deacetylases that depend on nicotine adenine dinucleotide (NAD). They are found in many subcellular locations, including the nucleus, cytoplasm and mitochondria. Eukaryotic forms play in important role in the regulation of transcriptional repression. Moreov…	K11121-ko04213 Longevity regulating pathway - multiple species;ko00760 Nicotinate and nicotinamide metabolism	KOG2684, KOG2684, KOG2684, Sirtuin 5 and related class III sirtuins (SIR2 family) [Chromatin structure and dynamics, Transcription]. 1.96e-68	sp|C8V3W5|HST1_EMENI NAD-dependent protein deacetylase hst1 OS=Emericella nidulans (strain FGSC A4 / ATCC 38163 / CBS 112.46 / NRRL 194 / M139) GN=AN10449 PE=3 SV=1 2.55e-154	GO:0000018, regulation of DNA recombination;GO:0000019, regulation of mitotic recombination;GO:0000118, histone deacetylase complex;GO:0000122, negative regulation of transcription by RNA polymerase II;GO:0000166, nucleotide binding;GO:0000183, chromatin silencing at rDNA;GO:0000228, nuclear chromosome;GO:0000302, response to reactive oxygen species;GO:0000726, non-recombinational repair;GO:00007…	XP_047492042.1 NAD-dependent protein deacetylase sirtuin-1-like [Penaeus chinensis] 6.71e-73	-
TRINITY_DN13986_c1_g1	-0.1839	0.645211	2.20281	-0.918902	-1.45741	-1.41308	1.48556	0.5515	-0.911798	1	-	-	-	-	sp|O94336|YHM3_SCHPO Uncharacterized FCP1 homology domain-containing protein C1271.03c OS=Schizosaccharomyces pombe (strain 972 / ATCC 24843) GN=SPBC1271.03c PE=3 SV=1 1.14e-26	GO:0003674, molecular_function;GO:0003824, catalytic activity;GO:0004721, phosphoprotein phosphatase activity;GO:0005575, cellular_component;GO:0005623, cell;GO:0005886, plasma membrane;GO:0006464, cellular protein modification process;GO:0006470, protein dephosphorylation;GO:0006793, phosphorus metabolic process;GO:0006796, phosphate-containing compound metabolic process;GO:0006807, nitrogen com…	CAF0743332.1 unnamed protein product [Didymodactylos carnosus] >CAF0773283.1 unnamed protein product [Didymodactylos carnosus] >CAF3521075.1 unnamed protein product [Didymodactylos carnosus] >CAF3555615.1 unnamed protein product [Didymodactylos carnosus] 9.23e-10	-
TRINITY_DN13992_c0_g1	1.29208	1.15649	0.780361	-0.403654	-0.594592	-0.233206	-0.410371	-0.757965	-0.82915	1	-	pfam06985, HET, Heterokaryon incompatibility protein (HET). This family represents a conserved region approximately 150 residues long within various heterokaryon incompatibility proteins that seem to be restricted to ascomycete fungi. Genetic differences in specific het genes prevent a viable heterokaryotic fungal cell from being formed by the fusion of filaments from two different wild-type stra…	-	-	sp|Q9UV10|HET6_NEUCR Heterokaryon incompatibility protein 6, OR allele OS=Neurospora crassa (strain ATCC 24698 / 74-OR23-1A / CBS 708.71 / DSM 1257 / FGSC 987) GN=het-6 PE=4 SV=1 2.07e-15	-	KAI1691421.1 heterokaryon incompatibility protein (HET) domain-containing protein [Ditylenchus destructor] 4.64e-27	-
TRINITY_DN13996_c0_g3	0.848569	1.65097	1.17549	-1.12183	-0.39218	-1.08195	0.0429128	-0.126686	-0.995286	1	cd16871, ARID_Swi1p-like, ARID/BRIGHT DNA binding domain of yeast SWI/SNF chromatin-remodeling complex subunit Swi1p and similar proteins. Saccharomyces cerevisiae Swi1p, also called SWI/SNF chromatin-remodeling complex subunit SWI1, regulatory protein GAM3, or transcription regulatory protein ADR6, is a transcription regulatory protein that is a subunit of the SWI/SNF complex, which plays critic…	pfam01388, ARID, ARID/BRIGHT DNA binding domain. This domain is know as ARID for AT-Rich Interaction Domain, and also known as the BRIGHT domain. 6.65e-12	-	KOG2744, KOG2744, KOG2744, DNA-binding proteins Bright/BRCAA1/RBP1 and related proteins containing BRIGHT domain [Transcription]. 4.17e-07	sp|O74365|SOL1_SCHPO SWI/SNF chromatin-remodeling complex subunit sol1 OS=Schizosaccharomyces pombe (strain 972 / ATCC 24843) GN=sol1 PE=1 SV=1 3.77e-06	-	-	-
TRINITY_DN14008_c0_g1	1.47194	1.10935	1.66364	-0.218527	-1.56379	-1.4381	-0.565064	-0.375172	-0.084274	1	-	-	-	-	-	-	-	-
TRINITY_DN14012_c0_g1	0.614127	0.454821	1.11663	-0.638323	-0.647126	-0.642915	0.777796	-0.0826352	-0.952374	1	cd12168, Mand_dh_like, D-Mandelate Dehydrogenase-like dehydrogenases. D-Mandelate dehydrogenase (D-ManDH), identified as an enzyme that interconverts benzoylformate and D-mandelate, is a D-2-hydroxyacid dehydrogenase family member that catalyzes the conversion of c3-branched 2-ketoacids. D-ManDH exhibits broad substrate specificities for 2-ketoacids with large hydrophobic side chains, particularl…	pfam02826, 2-Hacid_dh_C, D-isomer specific 2-hydroxyacid dehydrogenase, NAD binding domain. This domain is inserted into the catalytic domain, the large dehydrogenase and D-lactate dehydrogenase families in SCOP. N-terminal portion of which is represented by family pfam00389. 4.78e-39	-	KOG0069, KOG0069, KOG0069, Glyoxylate/hydroxypyruvate reductase (D-isomer-specific 2-hydroxy acid dehydrogenase superfamily) [Energy production and conversion]. 3.69e-48	sp|O94574|YGDH_SCHPO Putative 2-hydroxyacid dehydrogenase C1773.17c OS=Schizosaccharomyces pombe (strain 972 / ATCC 24843) GN=SPBC1773.17c PE=3 SV=3 2.11e-75	-	MCL4125640.1 hypothetical protein [Idotea baltica] 2.13e-53	-
TRINITY_DN14035_c1_g1	1.44804	1.16407	0.894006	-0.327832	-0.569006	-0.474766	-0.783799	-0.944888	-0.405831	1	-	-	-	-	-	-	-	-
TRINITY_DN14046_c1_g1	0.370266	1.2057	1.35694	-0.66451	-1.01479	-0.909093	0.418685	0.153148	-0.916341	1	cd04878, ACT_AHAS, N-terminal ACT domain of the Escherichia coli IlvH-like regulatory subunit of acetohydroxyacid synthase (AHAS). ACT_AHAS: N-terminal ACT domain of the Escherichia coli IlvH-like regulatory subunit of acetohydroxyacid synthase (AHAS). AHAS catalyses the first common step in the biosynthesis of the three branched-chain amino acids. The first step involves the condensation of eith…	-	-	KOG2663, KOG2663, KOG2663, Acetolactate synthase, small subunit [Amino acid transport and metabolism]. 5.22e-76	sp|P25605|ILV6_YEAST Acetolactate synthase small subunit, mitochondrial OS=Saccharomyces cerevisiae (strain ATCC 204508 / S288c) GN=ILV6 PE=1 SV=2 6.10e-105	-	AQT27096.1 putative acetolactate synthase, partial [Nilaparvata lugens] 9.60e-107	-
TRINITY_DN14050_c0_g2	1.41192	1.4512	0.545112	0.0677673	-1.22403	0.0081003	-0.831948	-0.855143	-0.572983	1	cd08864, SRPBCC_DUF3074, DUF3074, an uncharacterized ligand-binding domain of the SRPBCC domain superfamily. Uncharacterized family of the SRPBCC (START/RHO_alpha_C/PITP/Bet_v1/CoxG/CalC) domain superfamily. SRPBCC domains have a deep hydrophobic ligand-binding pocket and they bind diverse ligands. SRPBCC domains include the steroidogenic acute regulatory protein (StAR)-related lipid transfer (ST…	pfam10350, DUF2428, Putative death-receptor fusion protein (DUF2428). This is a family of proteins conserved from plants to humans. The function is not known. Several members have been annotated as being HEAT repeat-containing proteins while others are designated as death-receptor interacting proteins, but neither of these could be confirmed. 2.59e-44	-	KOG1810, KOG1810, KOG1810, Cell cycle-associated protein [Cell cycle control, cell division, chromosome partitioning]. 2.19e-30	sp|Q03496|TR732_YEAST tRNA (cytidine(32)-2'-O)-methyltransferase non-catalytic subunit TRM732 OS=Saccharomyces cerevisiae (strain ATCC 204508 / S288c) GN=TRM732 PE=1 SV=1 2.10e-43	GO:0001510, RNA methylation;GO:0005575, cellular_component;GO:0005622, intracellular;GO:0005623, cell;GO:0005737, cytoplasm;GO:0006139, nucleobase-containing compound metabolic process;GO:0006396, RNA processing;GO:0006399, tRNA metabolic process;GO:0006400, tRNA modification;GO:0006725, cellular aromatic compound metabolic process;GO:0006807, nitrogen compound metabolic process;GO:0008033, tRNA …	XP_037638453.1 thyroid adenoma-associated protein [Sebastes umbrosus] 4.38e-36	-
TRINITY_DN14051_c1_g1	1.47338	1.29364	0.789999	0.0820021	-1.83052	-1.08455	-0.345246	-0.344397	-0.0343159	1	-	pfam06978, POP1, Ribonucleases P/MRP protein subunit POP1. This family represents a conserved region approximately 150 residues long located towards the N-terminus of the POP1 subunit that is common to both the RNase MRP and RNase P ribonucleoproteins (EC:3.1.26.5). These RNA-containing enzymes generate mature tRNA molecules by cleaving their 5' ends. 1.62e-53	K01164-ko03013 RNA transport;ko03008 Ribosome biogenesis in eukaryotes	KOG4730, KOG4730, KOG4730, D-arabinono-1, 4-lactone oxidase [Defense mechanisms]. 8.91e-14	sp|Q9UTA4|POPI_SCHPO Ribonucleases P/MRP protein subunit pop1 OS=Schizosaccharomyces pombe (strain 972 / ATCC 24843) GN=pop1 PE=3 SV=1 5.24e-53	GO:0000049, tRNA binding;GO:0000171, ribonuclease MRP activity;GO:0000172, ribonuclease MRP complex;GO:0000294, nuclear-transcribed mRNA catabolic process, endonucleolytic cleavage-dependent decay;GO:0000447, endonucleolytic cleavage in ITS1 to separate SSU-rRNA from 5.8S rRNA and LSU-rRNA from tricistronic rRNA transcript (SSU-rRNA, 5.8S rRNA, LSU-rRNA);GO:0000460, maturation of 5.8S rRNA;GO:000…	KAJ3031316.1 hypothetical protein HDU68_005058 [Siphonaria sp. JEL0065] 1.10e-36	-
TRINITY_DN14057_c3_g8	0.41514	0.629045	1.16867	-0.884665	-0.606011	-1.31622	0.654256	0.0844908	-0.144707	1	cd01310, TatD_DNAse, TatD like proteins; E.coli TatD is a cytoplasmic protein, shown to have magnesium dependent DNase activity. 3.80e-30	pfam05238, CENP-N, Kinetochore protein CHL4 like. CHL4 is a protein involved in chromosome segregation. It is a component of the central kinetochore which mediates the attachment of the centromere to the mitotic spindle. CENP-N is one of the components that assembles onto the CENP-A-nucleosome-associated (NAC) centromere. The centromere, which is the basic element of chromosome inheritance, is ep…	-	KOG3020, KOG3020, KOG3020, TatD-related DNase [Replication, recombination and repair]. 7.37e-07	sp|Q9UUF1|YNF8_SCHPO Deoxyribonuclease Tat-D OS=Schizosaccharomyces pombe (strain 972 / ATCC 24843) GN=pi038 PE=3 SV=1 8.35e-07	GO:0000003, reproduction;GO:0000070, mitotic sister chromatid segregation;GO:0000075, cell cycle checkpoint;GO:0000228, nuclear chromosome;GO:0000278, mitotic cell cycle;GO:0000280, nuclear division;GO:0000775, chromosome, centromeric region;GO:0000776, kinetochore;GO:0000777, condensed chromosome kinetochore;GO:0000778, condensed nuclear chromosome kinetochore;GO:0000779, condensed chromosome, c…	XP_030838832.1 putative deoxyribonuclease TATDN1 [Strongylocentrotus purpuratus] 1.06e-64	-
TRINITY_DN14060_c4_g5	1.44563	1.34726	1.18715	-0.0302321	-0.798428	-0.683416	-0.66743	-0.854293	-0.946241	1	-	pfam14310, Fn3-like, Fibronectin type III-like domain. This domain has a fibronectin type III-like structure. It is often found in association with pfam00933 and pfam01915. Its function is unknown. 6.84e-18	K05349-ko00500 Starch and sucrose metabolism;ko00940 Phenylpropanoid biosynthesis;ko00460 Cyanoamino acid metabolism	-	sp|A2QPK4|BGLD_ASPNC Probable beta-glucosidase D OS=Aspergillus niger (strain CBS 513.88 / FGSC A1513) GN=bglD PE=3 SV=2 0.0	-	CAF3350180.1 unnamed protein product [Rotaria socialis] >CAF4200121.1 unnamed protein product [Rotaria socialis] 1.80e-126	-
TRINITY_DN14062_c3_g3	1.01962	1.60856	1.63732	-0.655199	-0.83525	-0.650227	-0.810613	-0.494476	-0.819731	1	sd00017, ZF_C2H2, Zinc finger, C2H2 type. The C2H2 zinc finger is a classical zinc finger domain. C2H2-type zinc fingers are ubiquitous; more than 1% of all mammalian proteins are predicted to contain at least one zinc finger. They often function as DNA or protein binding structural motifs, such as in eukaryotic transcription factors, and therefore they play important roles in cellular processes …	-	-	KOG3576, KOG3576, KOG3576, Ovo and related transcription factors [Transcription]. 2.47e-07	sp|Q9NV72|ZN701_HUMAN Zinc finger protein 701 OS=Homo sapiens GN=ZNF701 PE=2 SV=3 2.82e-08	-	-	-
TRINITY_DN14066_c0_g3	0.95617	0.84506	1.36882	-1.01783	-0.237969	-0.713976	0.885702	-0.58155	-1.50443	1	cd00354, FBPase, Fructose-1,6-bisphosphatase, an enzyme that catalyzes the hydrolysis of fructose-1,6-biphosphate into fructose-6-phosphate and is critical in gluconeogenesis pathway. The alignment model also includes chloroplastic FBPases and sedoheptulose-1,7-biphosphatases that play a role in pentose phosphate pathway (Calvin cycle). 3.33e-21	pfam18913, FBPase_C, Fructose-1-6-bisphosphatase, C-terminal domain. This entry represents the C-terminal domain of Fructose-1-6-bisphosphatase enzymes. According to ECOD this domain has a Rossmann-like fold. 9.86e-11	K01100-ko00710 Carbon fixation in photosynthetic organisms;ko01200 Carbon metabolism	KOG1458, KOG1458, KOG1458, Fructose-1,6-bisphosphatase [Carbohydrate transport and metabolism]. 1.12e-16	sp|O20252|S17P_SPIOL Sedoheptulose-1,7-bisphosphatase, chloroplastic OS=Spinacia oleracea PE=2 SV=1 2.29e-44	-	KAI3381340.1 hypothetical protein SNEBB_006416 [Seison nebaliae] 2.83e-17	-
TRINITY_DN14070_c1_g2	1.45937	1.78607	1.62412	-0.360623	-1.32187	-0.7193	-0.259029	-0.86501	-1.34373	1	cd07229, Pat_TGL3_like, Triacylglycerol lipase 3. Triacylglycerol lipase 3 (TGL3) are responsible for all the TAG lipase activity of the lipid particle. Triacylglycerol (TAG) lipases are also necessary for the mobilization of TAG stored in lipid particles. TGL3 contains the consensus sequence motif GXSXG, which is found in lipolytic enzymes. This family includes Tgl3p from Saccharomyces cerevisia…	pfam11815, DUF3336, Domain of unknown function (DUF3336). This family of proteins are functionally uncharacterized. This family is found in bacteria and eukaryotes. This presumed domain is typically between 143 to 227 amino acids in length. 2.95e-16	K14675-ko00561 Glycerolipid metabolism	KOG2214, KOG2214, KOG2214, Predicted esterase of the alpha-beta hydrolase superfamily [General function prediction only]. 1.17e-79	sp|Q9Y7P3|TLG3_SCHPO Probable triacylglycerol lipase C1450.16c OS=Schizosaccharomyces pombe (strain 972 / ATCC 24843) GN=SPCC1450.16c PE=3 SV=2 1.14e-87	GO:0000003, reproduction;GO:0003674, molecular_function;GO:0003824, catalytic activity;GO:0004806, triglyceride lipase activity;GO:0005575, cellular_component;GO:0005622, intracellular;GO:0005623, cell;GO:0005811, lipid droplet;GO:0006629, lipid metabolic process;GO:0006638, neutral lipid metabolic process;GO:0006639, acylglycerol metabolic process;GO:0006641, triglyceride metabolic process;GO:00…	KAJ3025690.1 hypothetical protein HDU68_006805 [Siphonaria sp. JEL0065] 2.76e-101	-
TRINITY_DN14075_c2_g4	0.913115	1.37705	1.05635	-0.823625	-1.05474	-0.840345	0.795809	-0.106364	-1.31725	1	cd03879, M28_AAP, M28 Zn-peptidase Aeromonas (Vibrio) proteolytica aminopeptidase. Peptidase family M28; Aeromonas (Vibrio) proteolytica aminopeptidase (AAP; leucine aminopeptidase from Vibrio proteolyticus; Bacterial leucyl aminopeptidase; E.C. 3.4.11.10) subfamily. AAP is a small (32kDa), heat stable leucine aminopeptidase and is active as a monomer. Similar forms of the enzyme have been isolat…	pfam01557, FAA_hydrolase, Fumarylacetoacetate (FAA) hydrolase family. This family consists of fumarylacetoacetate (FAA) hydrolase, or fumarylacetoacetate hydrolase (FAH) and it also includes HHDD isomerase/OPET decarboxylase from E. coli strain W. FAA is the last enzyme in the tyrosine catabolic pathway, it hydrolyzes fumarylacetoacetate into fumarate and acetoacetate which then join the citric a…	-	KOG2194, KOG2194, KOG2194, Aminopeptidases of the M20 family [Posttranslational modification, protein turnover, chaperones, General function prediction only]. 4.30e-06	sp|A4R640|LAP1_MAGO7 Leucine aminopeptidase 1 OS=Magnaporthe oryzae (strain 70-15 / ATCC MYA-4617 / FGSC 8958) GN=LAP1 PE=3 SV=1 2.08e-56	-	KAJ3012847.1 hypothetical protein HDU68_000989 [Siphonaria sp. JEL0065] 5.13e-48	-
TRINITY_DN14076_c1_g3	1.05321	1.30166	1.30447	0.830125	-2.18537	-0.744401	-0.60852	-0.591152	-0.360025	1	cd16573, RING-HC_TFB3_like, RING finger, HC subclass, found in RNA polymerase II transcription factor B subunit 3 (TFB3) from fungi. TFB3, also known as RNA polymerase II transcription factor B 38 kDa subunit, RNA polymerase II transcription factor B p38 subunit, or Rig2, is a component of the general transcription and DNA repair factor IIH (TFIIH or factor B), which is essential for both basal a…	pfam06391, MAT1, CDK-activating kinase assembly factor MAT1. MAT1 is an assembly/targeting factor for cyclin-dependent kinase-activating kinase (CAK), which interacts with the transcription factor TFIIH. The domain found to the N-terminal side of this domain is a C3HC4 RING finger. 5.84e-20	K10842-ko03022 Basal transcription factors;ko03420 Nucleotide excision repair	KOG3800, KOG3800, KOG3800, Predicted E3 ubiquitin ligase containing RING finger, subunit of transcription/repair factor TFIIH and CDK-activating kinase assembly factor [Posttranslational modification, protein turnover, chaperones]. 5.67e-30	sp|Q6BP96|TFB3_DEBHA RNA polymerase II transcription factor B subunit 3 OS=Debaryomyces hansenii (strain ATCC 36239 / CBS 767 / JCM 1990 / NBRC 0083 / IGC 2968) GN=TFB3 PE=3 SV=2 4.16e-50	GO:0000079, regulation of cyclin-dependent protein serine/threonine kinase activity;GO:0000109, nucleotide-excision repair complex;GO:0000112, nucleotide-excision repair factor 3 complex;GO:0000428, DNA-directed RNA polymerase complex;GO:0001932, regulation of protein phosphorylation;GO:0001934, positive regulation of protein phosphorylation;GO:0003674, molecular_function;GO:0003824, catalytic ac…	CAD2205308.1 unnamed protein product [Meloidogyne enterolobii] 8.14e-26	-
TRINITY_DN14079_c2_g4	0.902619	1.08207	1.05247	0.17116	-1.05342	-0.738978	0.0666173	-0.65594	-0.82659	1	cd01833, XynB_like, SGNH_hydrolase subfamily, similar to Ruminococcus flavefaciens XynB. Most likely a secreted hydrolase with xylanase activity. SGNH hydrolases are a diverse family of lipases and esterases. The tertiary fold of the enzyme is substantially different from that of the alpha/beta hydrolase family and unique among all known hydrolases; its active site closely resembles the Ser-His-A…	-	-	-	sp|Q9RLB8|CESA_RUMFL Multidomain esterase OS=Ruminococcus flavefaciens GN=cesA PE=1 SV=1 1.03e-08	-	-	-
TRINITY_DN14080_c0_g1	0.552518	0.63635	0.965155	-0.661572	-1.12558	-0.865025	0.855755	0.16648	-0.524084	1	cd04618, CBS_euAMPK_gamma-like_repeat1, Two tandem repeats of the cystathionine beta-synthase (CBS pair) domains found in AMP-activated protein kinase gamma-like proteins, repeat 1. AMP-activated protein kinase (AMPK) plays multiple roles in the body's overall metabolic balance and response to exercise, nutritional stress, hormonal stimulation, and the glucose-lowering drugs metformin and rosigli…	-	-	KOG1764, KOG1764, KOG1764, 5'-AMP-activated protein kinase, gamma subunit [Energy production and conversion]. 2.45e-53	sp|Q9P869|SNF4_KLULA Nuclear protein SNF4 OS=Kluyveromyces lactis (strain ATCC 8585 / CBS 2359 / DSM 70799 / NBRC 1267 / NRRL Y-1140 / WM37) GN=SNF4 PE=3 SV=2 4.33e-112	GO:0003674, molecular_function;GO:0005096, GTPase activator activity;GO:0005575, cellular_component;GO:0005622, intracellular;GO:0005623, cell;GO:0005737, cytoplasm;GO:0008047, enzyme activator activity;GO:0008150, biological_process;GO:0030234, enzyme regulator activity;GO:0030695, GTPase regulator activity;GO:0043085, positive regulation of catalytic activity;GO:0043087, regulation of GTPase ac…	XP_039301270.1 LOW QUALITY PROTEIN: 5'-AMP-activated protein kinase subunit gamma-like [Nilaparvata lugens] 2.02e-132	-
TRINITY_DN14083_c1_g12	1.90846	2.03454	1.88188	-1.21877	-1.0405	-1.32001	-0.391782	-0.725471	-1.12835	1	-	-	-	-	-	-	-	-
TRINITY_DN14097_c3_g1	0.880196	0.798465	1.74052	0.0561288	-2.00805	-1.24365	-0.427225	-0.632131	0.83575	1	cd05911, Firefly_Luc_like, Firefly luciferase of light emitting insects and 4-Coumarate-CoA Ligase (4CL). This family contains insect firefly luciferases that share significant sequence similarity to plant 4-coumarate:coenzyme A ligases, despite their functional diversity. Luciferase catalyzes the production of light in the presence of MgATP, molecular oxygen, and luciferin. In the first step, lu…	pfam00501, AMP-binding, AMP-binding enzyme. 8.99e-21	-	KOG1176, KOG1176, KOG1176, Acyl-CoA synthetase [Lipid transport and metabolism]. 1.56e-58	sp|Q4WLD5|PYR1_ASPFU Nicotinic acid-CoA ligase pyr1 OS=Neosartorya fumigata (strain ATCC MYA-4609 / Af293 / CBS 101355 / FGSC A1100) GN=pyr1 PE=1 SV=1 7.88e-97	-	XP_003386175.1 PREDICTED: probable 4-coumarate--CoA ligase 1 [Amphimedon queenslandica] 2.73e-52	-
TRINITY_DN14100_c3_g8	0.707033	1.13391	1.73074	-1.28716	-2.30248	-1.15936	1.14791	0.366018	-0.336617	1	-	pfam01474, DAHP_synth_2, Class-II DAHP synthetase family. Members of this family are aldolase enzymes that catalyze the first step of the shikimate pathway. 1.33e-65	K01626-ko00400 Phenylalanine, tyrosine and tryptophan biosynthesis;ko02024 Quorum sensing;ko01230 Biosynthesis of amino acids	-	sp|P80576|AROF_NEUCR Phospho-2-dehydro-3-deoxyheptonate aldolase OS=Neurospora crassa (strain ATCC 24698 / 74-OR23-1A / CBS 708.71 / DSM 1257 / FGSC 987) GN=aro-8 PE=1 SV=2 3.27e-90	-	KAJ3024763.1 hypothetical protein HDU68_007798 [Siphonaria sp. JEL0065] 1.02e-62	-
TRINITY_DN14103_c0_g2	0.547619	0.587434	1.55633	-0.347102	-0.722477	-1.33755	0.434206	-0.0276532	-0.69081	1	-	-	-	-	-	-	KMQ82093.1 ring finger-like protein, partial [Lasius niger] 8.04e-27	-
TRINITY_DN14105_c3_g2	0.283623	0.127685	1.20696	-1.00222	-0.662216	-1.17495	1.43167	0.355203	-0.565754	1	cd11061, CYP67-like, cytochrome P450 family 67 and similar cytochrome P450s. This subfamily includes Uromyces viciae-fabae cytochrome P450 67 (CYP67), also called planta-induced rust protein 16, Cystobasidium minutum (Rhodotorula minuta) cytochrome P450rm, and other fungal cytochrome P450s. P450rm catalyzes the formation of isobutene and 4-hydroxylation of benzoate. The gene encoding CYP67 is a p…	pfam00067, p450, Cytochrome P450. Cytochrome P450s are haem-thiolate proteins involved in the oxidative degradation of various compounds. They are particularly well known for their role in the degradation of environmental toxins and mutagens. They can be divided into 4 classes, according to the method by which electrons from NAD(P)H are delivered to the catalytic site. Sequence conservation is re…	-	KOG0158, KOG0158, KOG0158, Cytochrome P450 CYP3/CYP5/CYP6/CYP9 subfamilies [Secondary metabolites biosynthesis, transport and catabolism]. 1.40e-21	sp|A1DA60|FTMC_NEOFI Tryprostatin B 6-hydroxylase OS=Neosartorya fischeri (strain ATCC 1020 / DSM 3700 / FGSC A1164 / NRRL 181) GN=ftmP450-1 PE=3 SV=1 5.90e-36	-	KAE8610092.1 hypothetical protein XENTR_v10012012 [Xenopus tropicalis] 6.76e-22	-
TRINITY_DN14114_c0_g1	1.26847	1.80842	2.22564	-0.475139	-1.58046	-0.840346	-0.787017	-1.16908	-0.450484	1	cd08646, FMT_core_Met-tRNA-FMT_N, Methionyl-tRNA formyltransferase, N-terminal hydrolase domain. Methionyl-tRNA formyltransferase (Met-tRNA-FMT), N-terminal formyltransferase domain. Met-tRNA-FMT transfers a formyl group from N-10 formyltetrahydrofolate to the amino terminal end of a methionyl-aminoacyl-tRNA acyl moiety, yielding formyl-Met-tRNA. Formyl-Met-tRNA plays essential role in protein tr…	pfam05093, CIAPIN1, Cytokine-induced anti-apoptosis inhibitor 1, Fe-S biogenesis. Anamorsin, subsequently named CIAPIN1 for cytokine-induced anti-apoptosis inhibitor 1, in humans is the homolog of yeast Dre2, a conserved soluble eukaryotic Fe-S cluster protein, that functions in cytosolic Fe-S protein biogenesis. It is found in both the cytoplasm and in the mitochondrial intermembrane space (IMS)…	K00604-ko00670 One carbon pool by folate;ko00970 Aminoacyl-tRNA biosynthesis	KOG3082, KOG3082, KOG3082, Methionyl-tRNA formyltransferase [Translation, ribosomal structure and biogenesis]. 6.08e-16	sp|A7EYZ4|DRE2_SCLS1 Fe-S cluster assembly protein dre2 OS=Sclerotinia sclerotiorum (strain ATCC 18683 / 1980 / Ss-1) GN=dre2 PE=3 SV=1 8.37e-37	GO:0003674, molecular_function;GO:0003824, catalytic activity;GO:0004479, methionyl-tRNA formyltransferase activity;GO:0005575, cellular_component;GO:0005622, intracellular;GO:0005623, cell;GO:0005737, cytoplasm;GO:0005739, mitochondrion;GO:0006139, nucleobase-containing compound metabolic process;GO:0006396, RNA processing;GO:0006399, tRNA metabolic process;GO:0006400, tRNA modification;GO:00064…	KAF6406434.1 cytokine induced apoptosis inhibitor 1 [Molossus molossus] 7.33e-17	-
TRINITY_DN14114_c1_g5	-0.424506	0.0904106	2.21564	-1.19045	-0.937005	-1.11699	1.28175	0.809572	-0.728421	1	-	-	-	-	-	-	-	-
TRINITY_DN14123_c0_g1	0.684061	0.783655	1.23078	-0.385909	-1.26123	-0.388426	0.225294	-0.295437	-0.59279	1	-	-	-	-	-	-	-	-
TRINITY_DN14126_c0_g4	0.175706	0.591965	0.491168	-0.679482	-1.61408	-1.38487	0.937787	0.707864	0.773944	1	cd03506, Delta6-FADS-like, The Delta6 Fatty Acid Desaturase (Delta6-FADS)-like CD includes the integral-membrane enzymes: delta-4, delta-5, delta-6, delta-8, delta-8-sphingolipid, and delta-11 desaturases found in vertebrates, higher plants, fungi, and bacteria. These desaturases are required for the synthesis of highly unsaturated fatty acids (HUFAs), which are mainly esterified into phospholipi…	-	-	KOG4232, KOG4232, KOG4232, Delta 6-fatty acid desaturase/delta-8 sphingolipid desaturase [Lipid transport and metabolism]. 8.25e-19	sp|Q6CMK7|SLD1_KLULA Delta 8-(E)-sphingolipid desaturase OS=Kluyveromyces lactis (strain ATCC 8585 / CBS 2359 / DSM 70799 / NBRC 1267 / NRRL Y-1140 / WM37) GN=SLD PE=3 SV=1 3.73e-15	GO:0003674, molecular_function;GO:0003824, catalytic activity;GO:0006629, lipid metabolic process;GO:0006643, membrane lipid metabolic process;GO:0006664, glycolipid metabolic process;GO:0006665, sphingolipid metabolic process;GO:0006672, ceramide metabolic process;GO:0006677, glycosylceramide metabolic process;GO:0006678, glucosylceramide metabolic process;GO:0006679, glucosylceramide biosynthet…	CAF0831873.1 unnamed protein product [Didymodactylos carnosus] >CAF3616407.1 unnamed protein product [Didymodactylos carnosus] 5.36e-125	-
TRINITY_DN14128_c1_g2	0.651421	0.9622	1.4189	-0.503595	-0.878108	-1.90578	0.756656	0.117141	-0.618836	1	-	-	-	KOG2929, KOG2929, KOG2929, Transcription factor, component of CCR4 transcriptional complex [Transcription]. 1.20e-33	sp|A4R8F9|CAF17_MAGO7 Putative transferase CAF17, mitochondrial OS=Magnaporthe oryzae (strain 70-15 / ATCC MYA-4617 / FGSC 8958) GN=CAF17 PE=3 SV=1 2.19e-86	GO:0005575, cellular_component;GO:0005622, intracellular;GO:0005623, cell;GO:0005737, cytoplasm;GO:0005739, mitochondrion;GO:0005759, mitochondrial matrix;GO:0006790, sulfur compound metabolic process;GO:0008150, biological_process;GO:0008152, metabolic process;GO:0009987, cellular process;GO:0016043, cellular component organization;GO:0016226, iron-sulfur cluster assembly;GO:0022607, cellular co…	KAJ3008841.1 Iron-sulfur clusters incorporation protein [Siphonaria sp. JEL0065] 3.54e-40	-
TRINITY_DN14133_c1_g7	1.04515	2.18721	1.42191	-1.26395	-1.39276	-1.32593	0.571302	0.155371	-1.3983	1	-	pfam00566, RabGAP-TBC, Rab-GTPase-TBC domain. Identification of a TBC domain in GYP6_YEAST and GYP7_YEAST, which are GTPase activator proteins of yeast Ypt6 and Ypt7, implies that these domains are GTPase activator proteins of Rab-like small GTPases. 1.59e-27	-	KOG4347, KOG4347, KOG4347, GTPase-activating protein VRP [General function prediction only]. 3.31e-103	sp|C8VDQ4|GYP2_EMENI Putative GTPase-activating protein AN11010 OS=Emericella nidulans (strain FGSC A4 / ATCC 38163 / CBS 112.46 / NRRL 194 / M139) GN=AN11010 PE=3 SV=1 0.0	GO:0003674, molecular_function;GO:0005096, GTPase activator activity;GO:0005488, binding;GO:0005509, calcium ion binding;GO:0005515, protein binding;GO:0005575, cellular_component;GO:0005622, intracellular;GO:0005623, cell;GO:0005737, cytoplasm;GO:0006810, transport;GO:0006886, intracellular protein transport;GO:0008047, enzyme activator activity;GO:0008104, protein localization;GO:0008150, biolo…	XP_033118031.1 TBC1 domain family member 9-like isoform X3 [Anneissia japonica] 2.34e-73	-
TRINITY_DN14134_c3_g9	-0.373789	-0.0654572	1.5268	-0.951259	-1.16226	-1.42416	2.44017	0.786508	-0.77655	1	-	-	-	-	-	-	CAH1979414.1 unnamed protein product [Acanthoscelides obtectus] 1.81e-07	-
TRINITY_DN14149_c0_g1	1.4073	1.27894	1.76382	-0.968746	-1.19694	-1.08626	0.509619	-0.592406	-1.11533	1	-	pfam01083, Cutinase, Cutinase. 2.35e-08	-	-	sp|O59893|AXE2_TALPU Acetylxylan esterase 2 OS=Talaromyces purpureogenus GN=axe-2 PE=1 SV=1 3.43e-14	-	-	-
TRINITY_DN14164_c1_g5	0.244917	0.442524	1.58384	-1.14865	-0.735523	-0.450974	1.186	0.206799	-1.32893	1	cd12148, fungal_TF_MHR, fungal transcription factor regulatory middle homology region. This domain is present in the large family of fungal zinc cluster transcription factors that contain an N-terminal GAL4-like C6 zinc binuclear cluster DNA-binding domain. Examples of members of this large fungal group are the following Saccharomyces cerevisiae transcription factors, GAL4, STB5, DAL81, CAT8, RDR…	-	-	-	-	-	-	-
TRINITY_DN14168_c0_g5	0.315447	1.14052	1.87768	-1.1396	-0.787672	-1.28963	1.45701	-0.279203	-1.29457	1	-	-	-	KOG0322, KOG0322, KOG0322, G-protein beta subunit-like protein GNB1L, contains WD repeats [General function prediction only]. 3.61e-22	sp|A7UWE6|ASA1_NEUCR ASTRA-associated protein 1 OS=Neurospora crassa (strain ATCC 24698 / 74-OR23-1A / CBS 708.71 / DSM 1257 / FGSC 987) GN=asa-1 PE=3 SV=1 1.79e-149	GO:0000228, nuclear chromosome;GO:0000785, chromatin;GO:0000790, nuclear chromatin;GO:0005575, cellular_component;GO:0005622, intracellular;GO:0005623, cell;GO:0005634, nucleus;GO:0005694, chromosome;GO:0006325, chromatin organization;GO:0006338, chromatin remodeling;GO:0006996, organelle organization;GO:0008150, biological_process;GO:0009987, cellular process;GO:0016043, cellular component organ…	XP_038665480.1 guanine nucleotide-binding protein subunit beta-like protein 1 [Scyliorhinus canicula] >XP_038665573.1 guanine nucleotide-binding protein subunit beta-like protein 1 [Scyliorhinus canicula] 5.41e-22	-
TRINITY_DN14168_c0_g7	0.238001	0.824411	1.54814	-0.780901	-1.18696	-0.741695	1.29175	0.277297	-1.47004	1	-	-	-	-	sp|Q5A4F3|AHR1_CANAL Adhesion and hyphal regulator 1 OS=Candida albicans (strain SC5314 / ATCC MYA-2876) GN=AHR1 PE=1 SV=1 2.68e-13	-	-	-
TRINITY_DN14178_c0_g1	1.41658	0.661187	1.53598	0.379276	-1.69478	-1.35607	-0.477953	-0.491871	0.0276563	1	-	pfam12349, Sterol-sensing, Sterol-sensing domain of SREBP cleavage-activation. Sterol regulatory element-binding proteins (SREBPs) are membrane-bound transcription factors that promote lipid synthesis in animal cells. They are embedded in the membranes of the endoplasmic reticulum (ER) in a helical hairpin orientation and are released from the ER by a two-step proteolytic process. Proteolysis beg…	-	-	sp|O43043|SCAP_SCHPO Sterol regulatory element-binding protein cleavage-activating protein OS=Schizosaccharomyces pombe (strain 972 / ATCC 24843) GN=scp1 PE=1 SV=1 2.29e-26	GO:0000139, Golgi membrane;GO:0003674, molecular_function;GO:0005488, binding;GO:0005496, steroid binding;GO:0005575, cellular_component;GO:0005622, intracellular;GO:0005623, cell;GO:0005737, cytoplasm;GO:0005783, endoplasmic reticulum;GO:0005789, endoplasmic reticulum membrane;GO:0005794, Golgi apparatus;GO:0006355, regulation of transcription, DNA-templated;GO:0006357, regulation of transcripti…	NXQ67172.1 SCAP protein [Quiscalus mexicanus] 4.38e-20	-
TRINITY_DN14182_c0_g1	0.793818	0.813942	1.84605	-1.86382	-1.45244	-1.7665	1.72919	0.491255	-0.59149	1	cd02654, nuc_hydro_CjNH, nuc_hydro_CjNH. Nucleoside hydrolases similar to Campylobacter jejuni nucleoside hydrolase. This group contains eukaryotic and bacterial proteins similar to C. jejuni nucleoside hydrolase. Nucleoside hydrolases cleave the N-glycosidic bond in nucleosides generating ribose and the respective base. These enzymes vary in their substrate specificity. C. jejuni nucleoside hydr…	pfam01156, IU_nuc_hydro, Inosine-uridine preferring nucleoside hydrolase. 2.24e-14	-	KOG2938, KOG2938, KOG2938, Predicted inosine-uridine preferring nucleoside hydrolase [Nucleotide transport and metabolism]. 1.09e-09	sp|Q9HGL1|YHLB_SCHPO Uncharacterized protein C800.11 OS=Schizosaccharomyces pombe (strain 972 / ATCC 24843) GN=SPBC800.11 PE=3 SV=1 3.14e-32	GO:0003674, molecular_function;GO:0003824, catalytic activity;GO:0005575, cellular_component;GO:0005622, intracellular;GO:0005623, cell;GO:0005737, cytoplasm;GO:0005829, cytosol;GO:0006139, nucleobase-containing compound metabolic process;GO:0006152, purine nucleoside catabolic process;GO:0006725, cellular aromatic compound metabolic process;GO:0006807, nitrogen compound metabolic process;GO:0008…	CAF0847424.1 unnamed protein product [Adineta steineri] 1.81e-85	-
TRINITY_DN14185_c0_g2	1.328	1.47203	0.824384	-0.279618	-0.830185	-0.46236	-0.761577	-0.893034	-0.397636	1	-	-	-	-	-	-	-	-
TRINITY_DN14190_c4_g1	1.51496	1.27434	0.696336	-0.017719	-0.12791	-0.854286	-0.547472	-1.114	-0.824254	1	-	-	-	KOG4526, KOG4526, KOG4526, Predicted membrane protein [Function unknown]. 7.94e-07	sp|Q9URV4|YBL7_SCHPO Uncharacterized protein C106.07c OS=Schizosaccharomyces pombe (strain 972 / ATCC 24843) GN=SPBC106.07c PE=4 SV=1 1.07e-18	GO:0005575, cellular_component;GO:0005622, intracellular;GO:0005623, cell;GO:0005737, cytoplasm;GO:0005739, mitochondrion;GO:0006464, cellular protein modification process;GO:0006473, protein acetylation;GO:0006474, N-terminal protein amino acid acetylation;GO:0006807, nitrogen compound metabolic process;GO:0008150, biological_process;GO:0008152, metabolic process;GO:0009987, cellular process;GO:…	-	-
TRINITY_DN14193_c1_g6	0.656574	1.2689	0.964438	-0.290784	-1.44187	-0.973745	0.280037	-0.137106	-0.326449	1	cd11062, CYP58-like, cytochrome P450 family 58-like fungal cytochrome P450s. This group includes Fusarium sporotrichioides cytochrome P450 58 (CYP58, also known as Tri4 and trichodiene oxygenase), and similar fungal proteins. CYP58 catalyzes the oxygenation of trichodiene during the biosynthesis of trichothecenes, which are sesquiterpenoid toxins that act by inhibiting protein biosynthesis. The C…	pfam00067, p450, Cytochrome P450. Cytochrome P450s are haem-thiolate proteins involved in the oxidative degradation of various compounds. They are particularly well known for their role in the degradation of environmental toxins and mutagens. They can be divided into 4 classes, according to the method by which electrons from NAD(P)H are delivered to the catalytic site. Sequence conservation is re…	-	KOG0156, KOG0156, KOG0156, Cytochrome P450 CYP2 subfamily [Secondary metabolites biosynthesis, transport and catabolism]. 9.32e-16	sp|Q12612|TRI4_FUSSP Trichodiene oxygenase OS=Fusarium sporotrichioides GN=TRI4 PE=3 SV=1 4.53e-63	-	XP_036597164.1 cytochrome P450 3A8-like [Trichosurus vulpecula] 1.32e-20	-
TRINITY_DN14193_c1_g7	1.10222	1.16306	0.695923	-1.15278	-0.690206	-1.61058	1.06459	-0.350307	-0.221923	1	cd05327, retinol-DH_like_SDR_c_like, retinol dehydrogenase (retinol-DH), Light dependent Protochlorophyllide (Pchlide) OxidoReductase (LPOR) and related proteins, classical (c) SDRs. Classical SDR subgroup containing retinol-DHs, LPORs, and related proteins. Retinol is processed by a medium chain alcohol dehydrogenase followed by retinol-DHs. Pchlide reductases act in chlorophyll biosynthesis. Th…	pfam00106, adh_short, short chain dehydrogenase. This family contains a wide variety of dehydrogenases. 3.09e-10	-	KOG1208, KOG1208, KOG1208, Dehydrogenases with different specificities (related to short-chain alcohol dehydrogenases) [Secondary metabolites biosynthesis, transport and catabolism]. 8.07e-15	sp|O74959|YJCD_SCHPO Uncharacterized oxidoreductase C736.13 OS=Schizosaccharomyces pombe (strain 972 / ATCC 24843) GN=SPCC736.13 PE=3 SV=1 1.59e-23	-	CAG9808985.1 unnamed protein product [Chironomus riparius] 1.79e-18	-
TRINITY_DN14205_c2_g2	1.03368	1.25692	0.919145	0.268145	-1.65115	-0.321068	-0.550001	-0.584855	-0.370809	1	-	pfam16187, Peptidase_M16_M, Middle or third domain of peptidase_M16. Peptidase_M16_M is the third domain of peptidase_M16 in eukaryotes of the insulin-degrading-enzyme type. Insulin-degrading enzymes - insulysin - are zinc metallopeptidases that metabolize several bioactive peptides, including insulin and the amyloid-beta-peptide. The tertiary structure of insulin-degrading enzymes resembles a cl…	-	KOG0959, KOG0959, KOG0959, N-arginine dibasic convertase NRD1 and related Zn2+-dependent endopeptidases, insulinase superfamily [Posttranslational modification, protein turnover, chaperones]. 0.0	sp|O14077|MU138_SCHPO Putative zinc protease mug138 OS=Schizosaccharomyces pombe (strain 972 / ATCC 24843) GN=mug138 PE=1 SV=1 0.0	GO:0003674, molecular_function;GO:0003824, catalytic activity;GO:0004175, endopeptidase activity;GO:0004222, metalloendopeptidase activity;GO:0005575, cellular_component;GO:0005622, intracellular;GO:0005623, cell;GO:0005737, cytoplasm;GO:0005739, mitochondrion;GO:0006508, proteolysis;GO:0006807, nitrogen compound metabolic process;GO:0007323, peptide pheromone maturation;GO:0008150, biological_pr…	KAJ3016137.1 Insulinase (Peptidase M16) [Siphonaria sp. JEL0065] 1.83e-222	-
TRINITY_DN1421_c0_g1	0.507794	3.03518	0.826677	-0.728276	-0.728276	-0.728276	-0.728276	-0.728276	-0.728276	1	-	-	-	-	-	-	-	-
TRINITY_DN14223_c0_g1	0.535379	0.946082	1.76117	-1.0199	-1.37898	-1.29505	0.9375	-9.74666e-05	-0.486092	1	cd05398, NT_ClassII-CCAase, Nucleotidyltransferase (NT) domain of ClassII CCA-adding enzymes. CCA-adding enzymes add the sequence [cytidine(C)-cytidine-adenosine (A)], one nucleotide at a time, onto the 3' end of tRNA, in a template-independent reaction. This Class II group is comprised mainly of eubacterial and eukaryotic enzymes and includes Bacillus stearothermophilus CCAase, Escherichia coli …	pfam01743, PolyA_pol, Poly A polymerase head domain. This family includes nucleic acid independent RNA polymerases, such as Poly(A) polymerase, which adds the poly (A) tail to mRNA EC:2.7.7.19. This family also includes the tRNA nucleotidyltransferase that adds the CCA to the 3' of the tRNA EC:2.7.7.25. This family is part of the nucleotidyltransferase superfamily. 1.79e-17	-	KOG2159, KOG2159, KOG2159, tRNA nucleotidyltransferase/poly(A) polymerase [Translation, ribosomal structure and biogenesis]. 9.60e-47	sp|P21269|CCA1_YEAST CCA tRNA nucleotidyltransferase, mitochondrial OS=Saccharomyces cerevisiae (strain ATCC 204508 / S288c) GN=CCA1 PE=1 SV=1 4.62e-74	-	KAJ3012882.1 CCA tRNA nucleotidyltransferase, mitochondrial [Siphonaria sp. JEL0065] 5.07e-62	-
TRINITY_DN14227_c1_g1	0.875394	0.638695	1.0861	-1.01558	-0.665411	-0.627754	0.616934	0.148399	-1.05677	1	cd12148, fungal_TF_MHR, fungal transcription factor regulatory middle homology region. This domain is present in the large family of fungal zinc cluster transcription factors that contain an N-terminal GAL4-like C6 zinc binuclear cluster DNA-binding domain. Examples of members of this large fungal group are the following Saccharomyces cerevisiae transcription factors, GAL4, STB5, DAL81, CAT8, RDR…	-	-	-	sp|Q9KAK9|Y2278_BACHD Uncharacterized protein BH2278 OS=Bacillus halodurans (strain ATCC BAA-125 / DSM 18197 / FERM 7344 / JCM 9153 / C-125) GN=BH2278 PE=3 SV=1 2.95e-28	-	XP_037036842.1 uncharacterized protein aq_928-like isoform X3 [Bradysia coprophila] 6.19e-77	-
TRINITY_DN14230_c4_g7	0.770692	0.713563	0.801245	-0.98308	-0.666627	-0.700938	0.530071	0.328405	-0.793331	1	-	-	-	-	sp|Q5A4F3|AHR1_CANAL Adhesion and hyphal regulator 1 OS=Candida albicans (strain SC5314 / ATCC MYA-2876) GN=AHR1 PE=1 SV=1 3.41e-08	-	-	-
TRINITY_DN14236_c0_g3	1.59003	1.82984	2.10484	-1.66039	-0.554673	-2.35236	0.667587	-0.0731366	-1.55173	1	cd05312, NAD_bind_1_malic_enz, NAD(P) binding domain of malic enzyme (ME), subgroup 1. Malic enzyme (ME), a member of the amino acid dehydrogenase (DH)-like domain family, catalyzes the oxidative decarboxylation of L-malate to pyruvate in the presence of cations (typically Mg++ or Mn++) with the concomitant reduction of cofactor NAD+ or NADP+. ME has been found in all organisms, and plays importa…	pfam03949, Malic_M, Malic enzyme, NAD binding domain. 2.89e-64	K00029-ko00710 Carbon fixation in photosynthetic organisms;ko01200 Carbon metabolism;ko00620 Pyruvate metabolism	KOG1257, KOG1257, KOG1257, NADP+-dependent malic enzyme [Energy production and conversion]. 2.25e-149	sp|Q6TU48|MAOX_DICDI NADP-dependent malic enzyme OS=Dictyostelium discoideum GN=malA PE=2 SV=1 3.19e-141	-	KAJ3030227.1 hypothetical protein HDU68_009751 [Siphonaria sp. JEL0065] 4.79e-157	-
TRINITY_DN14241_c2_g1	1.36627	1.14529	0.767903	0.120662	-0.95581	-0.401641	-0.61382	-0.852254	-0.576594	1	cd00712, AsnB, Glutamine amidotransferases class-II (GATase) asparagine synthase_B type. Asparagine synthetase B catalyses the ATP-dependent conversion of aspartate to asparagine. This enzyme is a homodimer, with each monomer composed of a glutaminase domain and a synthetase domain. The N-terminal glutaminase domain hydrolyzes glutamine to glutamic acid and ammonia. 7.62e-30	pfam00733, Asn_synthase, Asparagine synthase. This family is always found associated with pfam00310. Members of this family catalyze the conversion of aspartate to asparagine. 6.71e-37	K01953-ko00250 Alanine, aspartate and glutamate metabolism	KOG0571, KOG0571, KOG0571, Asparagine synthase (glutamine-hydrolyzing) [Amino acid transport and metabolism]. 0.0	sp|P78753|ASNS_SCHPO Probable asparagine synthetase [glutamine-hydrolyzing] OS=Schizosaccharomyces pombe (strain 972 / ATCC 24843) GN=asn1 PE=1 SV=3 0.0	GO:0003674, molecular_function;GO:0003824, catalytic activity;GO:0004066, asparagine synthase (glutamine-hydrolyzing) activity;GO:0005488, binding;GO:0005515, protein binding;GO:0005575, cellular_component;GO:0005622, intracellular;GO:0005623, cell;GO:0005737, cytoplasm;GO:0006082, organic acid metabolic process;GO:0006520, cellular amino acid metabolic process;GO:0006528, asparagine metabolic pr…	XP_027201006.1 probable asparagine synthetase [glutamine-hydrolyzing] [Dermatophagoides pteronyssinus] 9.43e-206	-
TRINITY_DN14243_c2_g2	1.31804	1.49895	1.16434	-0.807088	-2.35098	-2.03637	0.831236	0.0459088	0.335969	1	cd02877, GH18_hevamine_XipI_class_III, This conserved domain family includes xylanase inhibitor Xip-I, and the class III plant chitinases such as hevamine, concanavalin B, and PPL2, all of which have a glycosyl hydrolase family 18 (GH18) domain. Hevamine is a class III endochitinase that hydrolyzes the linear polysaccharide chains of chitin and peptidoglycan and is important for defense against p…	pfam08624, CRC_subunit, Chromatin remodelling complex Rsc7/Swp82 subunit. This family has been identified as a subunit of chromatin remodelling complexes. Saccharomyces cerevisiae NPL6 and its paralogue SWP82 have been identified as subunits of the RSC chromatin remodelling complex, and SWI/SNF chromatin remodelling complex respectively. 4.07e-44	-	KOG4701, KOG4701, KOG4701, Chitinase [Cell wall/membrane/envelope biogenesis]. 7.25e-27	sp|O94522|RSC7_SCHPO Chromatin structure-remodeling complex subunit rsc7 OS=Schizosaccharomyces pombe (strain 972 / ATCC 24843) GN=rsc7 PE=1 SV=1 2.82e-78	GO:0000228, nuclear chromosome;GO:0000785, chromatin;GO:0000790, nuclear chromatin;GO:0003674, molecular_function;GO:0003676, nucleic acid binding;GO:0003677, DNA binding;GO:0003682, chromatin binding;GO:0005488, binding;GO:0005575, cellular_component;GO:0005622, intracellular;GO:0005623, cell;GO:0005634, nucleus;GO:0005694, chromosome;GO:0006139, nucleobase-containing compound metabolic process;…	CAF0951395.1 unnamed protein product [Rotaria sp. Silwood1] >CAF1190885.1 unnamed protein product [Rotaria sp. Silwood1] >CAF3470920.1 unnamed protein product [Rotaria sp. Silwood1] >CAF4507192.1 unnamed protein product [Rotaria sp. Silwood1] 3.91e-32	-
TRINITY_DN14243_c2_g4	1.37105	1.11198	1.40709	0.435762	-1.11723	-0.593607	-1.20567	-1.2813	-0.128072	1	-	pfam13520, AA_permease_2, Amino acid permease. 1.91e-21	-	KOG1289, KOG1289, KOG1289, Amino acid transporters [Amino acid transport and metabolism]. 1.83e-106	sp|Q09887|YC9D_SCHPO Uncharacterized amino-acid permease C584.13 OS=Schizosaccharomyces pombe (strain 972 / ATCC 24843) GN=SPCC584.13 PE=3 SV=1 6.51e-158	GO:0003333, amino acid transmembrane transport;GO:0003674, molecular_function;GO:0005215, transporter activity;GO:0005342, organic acid transmembrane transporter activity;GO:0005575, cellular_component;GO:0005623, cell;GO:0005886, plasma membrane;GO:0005887, integral component of plasma membrane;GO:0006810, transport;GO:0006811, ion transport;GO:0006820, anion transport;GO:0006865, amino acid tra…	CAF1116500.1 unnamed protein product [Adineta ricciae] 2.35e-70	-
TRINITY_DN14247_c3_g1	0.269663	0.745025	2.08504	-1.27395	-1.43955	-1.00866	1.46509	0.29184	-1.1345	1	-	pfam10637, Ofd1_CTDD, Oxoglutarate and iron-dependent oxygenase degradation C-term. Ofd1 is a prolyl 4-hydroxylase-like 2-oxoglutarate-Fe(II) dioxygenase that accelerates the degradation of Sre1N in the presence of oxygen. The domain is conserved from yeasts to humans. Yeast Sre1 is the orthologue of mammalian sterol regulatory element binding protein (SREBP), and it responds to changes in oxygen…	-	KOG3844, KOG3844, KOG3844, Predicted component of NuA3 histone acetyltransferase complex [Chromatin structure and dynamics]. 1.84e-63	sp|Q11120|OFD1_SCHPO Prolyl 3,4-dihydroxylase ofd1 OS=Schizosaccharomyces pombe (strain 972 / ATCC 24843) GN=ofd1 PE=1 SV=1 4.18e-113	GO:0000288, nuclear-transcribed mRNA catabolic process, deadenylation-dependent decay;GO:0000956, nuclear-transcribed mRNA catabolic process;GO:0003674, molecular_function;GO:0003676, nucleic acid binding;GO:0003723, RNA binding;GO:0003727, single-stranded RNA binding;GO:0003824, catalytic activity;GO:0005488, binding;GO:0005506, iron ion binding;GO:0005575, cellular_component;GO:0005622, intrace…	KAJ3026801.1 hypothetical protein HDU68_005032 [Siphonaria sp. JEL0065] 1.13e-56	-
TRINITY_DN14252_c0_g9	1.04461	0.664451	0.717874	-0.564311	-2.0575	-1.76206	2.30315	0.69803	-1.04424	1	-	-	K03136-ko03022 Basal transcription factors	KOG2593, KOG2593, KOG2593, Transcription initiation factor IIE, alpha subunit [Transcription]. 8.15e-27	sp|Q9P3W1|T2EA_SCHPO Transcription initiation factor IIE subunit alpha OS=Schizosaccharomyces pombe (strain 972 / ATCC 24843) GN=tfa1 PE=1 SV=3 1.26e-41	GO:0000428, DNA-directed RNA polymerase complex;GO:0000988, transcription factor activity, protein binding;GO:0000990, transcription factor activity, core RNA polymerase binding;GO:0000991, transcription factor activity, core RNA polymerase II binding;GO:0000993, RNA polymerase II core binding;GO:0001098, basal transcription machinery binding;GO:0001099, basal RNA polymerase II transcription mach…	RWS16228.1 General transcription factor IIE subunit 1-like protein [Dinothrombium tinctorium] >RWS16239.1 General transcription factor IIE subunit 1-like protein [Dinothrombium tinctorium] 7.06e-18	-
TRINITY_DN14258_c0_g4	1.67941	1.1881	1.30617	-0.50624	-3.0147	0.303443	-0.52477	-0.410303	-0.0211041	1	-	-	-	-	-	-	-	-
TRINITY_DN14258_c0_g5	1.12845	0.692862	1.09332	0.0744781	-1.0184	-1.1261	-0.534433	-0.268434	-0.041751	1	-	-	-	-	-	-	-	-
TRINITY_DN14258_c0_g9	0.536346	2.28874	2.44241	-0.347544	-1.88657	-1.01036	-0.896556	-0.52241	-0.604045	1	-	-	-	-	-	-	-	-
TRINITY_DN14263_c0_g1	0.551048	0.675491	1.97545	-0.834074	-1.11153	-1.17558	-0.327961	0.0916329	0.155522	1	-	-	-	-	-	-	-	-
TRINITY_DN14264_c0_g2	1.60571	1.81119	1.3503	-0.0866535	-1.77909	-1.46806	-0.365648	-0.829521	-0.238226	1	cd01285, nucleoside_deaminase, Nucleoside deaminases include adenosine, guanine and cytosine deaminases. These enzymes are Zn dependent and catalyze the deamination of nucleosides. The zinc ion in the active site plays a central role in the proposed catalytic mechanism, activating a water molecule to form a hydroxide ion that performs a nucleophilic attack on the substrate. The functional enzyme …	-	-	-	sp|O59834|FCYS_SCHPO Probable cytosine deaminase OS=Schizosaccharomyces pombe (strain 972 / ATCC 24843) GN=SPCC965.14c PE=3 SV=1 1.10e-09	-	CAF1009854.1 unnamed protein product [Rotaria sordida] >CAF4221850.1 unnamed protein product [Rotaria sordida] 3.17e-31	-
TRINITY_DN14276_c0_g9	1.00263	0.985093	1.29938	-0.685438	-0.872953	-1.12687	0.243235	0.0396289	-0.884709	1	-	-	-	-	-	-	-	-
TRINITY_DN14277_c1_g3	0.910676	1.28896	0.665109	-1.02192	-0.82952	-1.36845	0.306848	0.0957909	-0.0474985	1	-	pfam10295, DUF2406, Uncharacterized protein (DUF2406). This is a family of small proteins conserved in fungi. The function is not known. 6.94e-11	-	-	sp|Q2HDV5|VMA21_CHAGB Vacuolar ATPase assembly integral membrane protein VMA21 OS=Chaetomium globosum (strain ATCC 6205 / CBS 148.51 / DSM 1962 / NBRC 6347 / NRRL 1970) GN=VMA21 PE=3 SV=1 1.11e-44	GO:0005575, cellular_component;GO:0005623, cell;GO:0005933, cellular bud;GO:0005937, mating projection;GO:0030427, site of polarized growth;GO:0042995, cell projection;GO:0043332, mating projection tip;GO:0044463, cell projection part;GO:0044464, cell part;GO:0051286, cell tip;GO:0120025, plasma membrane bounded cell projection;GO:0120038, plasma membrane bounded cell projection part	-	-
TRINITY_DN14278_c2_g8	-0.220849	-0.0438947	1.57768	-1.31331	-0.870191	-0.955706	1.74599	0.805869	-0.725582	1	cd05339, 17beta-HSDXI-like_SDR_c, human 17-beta-hydroxysteroid dehydrogenase XI-like, classical (c) SDRs. 17-beta-hydroxysteroid dehydrogenases (17betaHSD) are a group of isozymes that catalyze activation and inactivation of estrogen and androgens. 17betaHSD type XI, a classical SDR, preferentially converts 3alpha-adiol to androsterone but not numerous other tested steroids. This subgroup of clas…	pfam00106, adh_short, short chain dehydrogenase. This family contains a wide variety of dehydrogenases. 9.11e-15	-	KOG1201, KOG1201, KOG1201, Hydroxysteroid 17-beta dehydrogenase 11 [Secondary metabolites biosynthesis, transport and catabolism]. 3.02e-48	sp|Q07530|YD114_YEAST Uncharacterized oxidoreductase YDL114W OS=Saccharomyces cerevisiae (strain ATCC 204508 / S288c) GN=YDL114W PE=3 SV=1 5.95e-31	GO:0003674, molecular_function;GO:0003824, catalytic activity;GO:0005575, cellular_component;GO:0005622, intracellular;GO:0005623, cell;GO:0005737, cytoplasm;GO:0005739, mitochondrion;GO:0008150, biological_process;GO:0008152, metabolic process;GO:0016020, membrane;GO:0016021, integral component of membrane;GO:0016491, oxidoreductase activity;GO:0031224, intrinsic component of membrane;GO:0043226…	XP_035743378.1 estradiol 17-beta-dehydrogenase 11-like isoform X2 [Vespa mandarinia] >XP_035743379.1 estradiol 17-beta-dehydrogenase 11-like isoform X2 [Vespa mandarinia] 1.33e-35	-
TRINITY_DN14280_c4_g6	-0.121724	0.210411	1.42443	-0.81213	-0.750839	-0.947074	1.18553	0.263084	-0.451695	1	-	pfam04084, ORC2, Origin recognition complex subunit 2. All DNA replication initiation is driven by a single conserved eukaryotic initiator complex termed he origin recognition complex (ORC). The ORC is a six protein complex. The function of ORC is reviewed in. 7.34e-65	K02604-ko04111 Cell cycle - yeast;ko04113 Meiosis - yeast;ko04110 Cell cycle	KOG2928, KOG2928, KOG2928, Origin recognition complex, subunit 2 [Replication, recombination and repair]. 9.11e-34	sp|Q09142|ORC2_SCHPO Origin recognition complex subunit 2 OS=Schizosaccharomyces pombe (strain 972 / ATCC 24843) GN=orc2 PE=1 SV=1 1.22e-37	GO:0000228, nuclear chromosome;GO:0000278, mitotic cell cycle;GO:0000785, chromatin;GO:0000790, nuclear chromatin;GO:0000808, origin recognition complex;GO:0003674, molecular_function;GO:0003676, nucleic acid binding;GO:0003677, DNA binding;GO:0003682, chromatin binding;GO:0003688, DNA replication origin binding;GO:0003690, double-stranded DNA binding;GO:0005488, binding;GO:0005575, cellular_comp…	CAF0799738.1 unnamed protein product [Didymodactylos carnosus] >CAF0921665.1 unnamed protein product [Didymodactylos carnosus] >CAF3583014.1 unnamed protein product [Didymodactylos carnosus] >CAF3700881.1 unnamed protein product [Didymodactylos carnosus] 7.02e-42	-
TRINITY_DN14283_c2_g3	0.355608	0.196404	0.849786	-1.06889	-1.28207	-1.59542	0.930749	0.788994	0.824842	1	-	-	-	-	-	-	-	-
TRINITY_DN14288_c1_g13	1.77667	1.22428	1.06149	0.0796492	-1.23181	-0.497736	-0.59098	-1.56429	-0.257285	1	-	-	-	-	-	-	-	-
TRINITY_DN14294_c2_g2	1.25171	1.24059	1.41712	-0.839972	-1.8053	-0.860513	0.671057	-0.182991	-0.891694	1	cd14474, SPX_YDR089W, SPX domain of the yeast protein YDR089W and related proteins. This region has been named the SPX domain after (Syg1, Pho81 and XPR1). The domain is found at the amino terminus of a variety of proteins. The uncharacterized yeast protein YDR089W has not been shown to be involved in phosphate homeostasis, in contrast to most of the other SPX-domain containing proteins. 4.66e-34	-	-	-	-	-	-	-
TRINITY_DN14302_c1_g8	0.819004	1.07809	1.66247	-0.543374	-1.08182	-1.32828	0.5159	-0.334963	-0.787029	1	-	pfam00793, DAHP_synth_1, DAHP synthetase I family. Members of this family catalyze the first step in aromatic amino acid biosynthesis from chorismate. E-coli has three related synthetases, which are inhibited by different aromatic amino acids. This family also includes KDSA which has very similar catalytic activity but is involved in the first step of liposaccharide biosynthesis. The enzyme is al…	K01626-ko00400 Phenylalanine, tyrosine and tryptophan biosynthesis;ko02024 Quorum sensing;ko01230 Biosynthesis of amino acids	-	sp|P32449|AROG_YEAST Phospho-2-dehydro-3-deoxyheptonate aldolase, tyrosine-inhibited OS=Saccharomyces cerevisiae (strain ATCC 204508 / S288c) GN=ARO4 PE=1 SV=2 1.65e-144	GO:0003674, molecular_function;GO:0003824, catalytic activity;GO:0003849, 3-deoxy-7-phosphoheptulonate synthase activity;GO:0005575, cellular_component;GO:0005622, intracellular;GO:0005623, cell;GO:0005634, nucleus;GO:0005737, cytoplasm;GO:0005739, mitochondrion;GO:0006082, organic acid metabolic process;GO:0006520, cellular amino acid metabolic process;GO:0006725, cellular aromatic compound meta…	KAJ3023257.1 3-deoxy-7-phosphoheptulonate synthase [Siphonaria sp. JEL0065] 1.10e-131	-
TRINITY_DN14309_c1_g1	0.752507	0.925732	0.868926	-0.25606	-1.90154	-1.07536	1.0296	0.00662231	-0.350423	1	-	-	-	-	-	-	-	-
TRINITY_DN14309_c2_g2	1.32496	1.59335	1.00711	0.0339177	-1.91751	-1.81972	0.484919	-0.466712	-0.240321	1	-	pfam00732, GMC_oxred_N, GMC oxidoreductase. This family of proteins bind FAD as a cofactor. 4.50e-13	-	KOG1238, KOG1238, KOG1238, Glucose dehydrogenase/choline dehydrogenase/mandelonitrile lyase (GMC oxidoreductase family) [General function prediction only]. 7.22e-13	sp|Q00922|ALOX_CANBO Alcohol oxidase OS=Candida boidinii GN=AOD1 PE=1 SV=1 2.99e-109	-	XP_015762929.1 PREDICTED: choline dehydrogenase, mitochondrial-like [Acropora digitifera] 1.80e-30	-
TRINITY_DN14309_c2_g6	0.165879	0.577939	1.88295	-0.935976	-0.851991	-0.568294	0.856946	0.175373	-1.30283	1	cd09870, PIN_YEN1, FEN-like PIN domains of Saccharomyces cerevisiae endonuclease 1 (YEN1), Chaetomium thermophilum junction-resolving enzyme GEN1, and fungal homologs. Fungal Endonuclease 1 (YEN1 and GEN1, GEN1 is known as YEN1 in Saccharomyces cerevisiae) is a four-way (Holliday) junction resolvase. Members of this subgroup belong to the structure-specific, 5' nuclease family (FEN-like) that cat…	pfam18380, GEN1_C, Holliday junction resolvase Gen1 C-terminal domain. This is the C-terminal domain found in GEN1 resolvase. It is composed of three-strand antiparallel beta sheets and four alpha helices. GEN1 protein, a member of the XPG/Rad2 family of structure-selective endonucleases, is specialized for the cleavage of Holliday junction recombination intermediates. Structural comparison indic…	-	KOG2520, KOG2520, KOG2520, 5'-3' exonuclease [Replication, recombination and repair]. 6.14e-22	sp|Q17RS7|GEN_HUMAN Flap endonuclease GEN homolog 1 OS=Homo sapiens GN=GEN1 PE=1 SV=2 5.81e-16	-	OWF56582.1 Flap endonuclease GEN-like 1 [Mizuhopecten yessoensis] 5.82e-22	-
TRINITY_DN14310_c2_g3	1.30552	1.27777	0.980733	-0.0413394	-1.82804	-1.55674	-0.19123	0.0610706	-0.00774628	1	cd01087, Prolidase, Prolidase. E.C. 3.4.13.9. Also known as Xaa-Pro dipeptidase, X-Pro dipeptidase, proline dipeptidase., imidodipeptidase, peptidase D, gamma-peptidase. Catalyses hydrolysis of Xaa-Pro dipeptides; also acts on aminoacyl-hydroxyproline analogs. No action on Pro-Pro. 4.11e-48	pfam00557, Peptidase_M24, Metallopeptidase family M24. This family contains metallopeptidases. It also contains non-peptidase homologs such as the N terminal domain of Spt16 which is a histone H3-H4 binding module. 7.24e-29	-	KOG2414, KOG2414, KOG2414, Putative Xaa-Pro aminopeptidase [Amino acid transport and metabolism]. 1.44e-118	sp|P40051|ICP55_YEAST Intermediate cleaving peptidase 55 OS=Saccharomyces cerevisiae (strain ATCC 204508 / S288c) GN=ICP55 PE=1 SV=1 3.23e-115	-	XP_028456223.1 xaa-Pro aminopeptidase 3 [Perca flavescens] >TDH02639.1 hypothetical protein EPR50_G00154730 [Perca flavescens] 1.25e-86	-
TRINITY_DN14320_c11_g1	0.779404	1.89931	1.42264	-0.308272	-1.41542	-0.654523	-0.416535	-0.211093	-1.09551	1	-	-	-	-	-	-	-	-
TRINITY_DN14344_c0_g1	1.00296	1.3379	1.1307	-0.885182	-0.676108	-1.47712	0.403515	-0.0424236	-0.794237	1	-	-	-	-	-	-	-	-
TRINITY_DN14411_c0_g1	1.55196	1.39075	1.48866	-0.0387882	-1.34598	-0.617571	-1.13792	-0.819906	-0.471199	1	-	-	-	-	-	-	-	-
TRINITY_DN14464_c0_g1	0.372313	0.518302	1.47698	-0.788416	-0.658403	-0.737228	1.66583	-0.320438	-1.52894	1	-	pfam01774, UreD, UreD urease accessory protein. UreD is a urease accessory protein. Urease pfam00449 hydrolyzes urea into ammonia and carbamic acid. UreD is involved in activation of the urease enzyme via the UreD-UreF-UreG-urease complex and is required for urease nickel metallocenter assembly. See also UreF pfam01730, UreG pfam01495. 2.29e-23	-	-	sp|P87125|URED_SCHPO Uncharacterized urease accessory protein ureD-like OS=Schizosaccharomyces pombe (strain 972 / ATCC 24843) GN=SPAC3A12.09c PE=3 SV=1 1.25e-38	GO:0006807, nitrogen compound metabolic process;GO:0008150, biological_process;GO:0008152, metabolic process;GO:0009987, cellular process;GO:0019627, urea metabolic process;GO:0034641, cellular nitrogen compound metabolic process;GO:0043603, cellular amide metabolic process;GO:0044237, cellular metabolic process;GO:0044281, small molecule metabolic process;GO:0071704, organic substance metabolic …	XP_013416227.1 urease accessory protein D [Lingula anatina] >XP_013416228.1 urease accessory protein D [Lingula anatina] 8.14e-28	-
TRINITY_DN14484_c0_g1	-0.128999	0.285249	1.99792	-1.02916	-1.49882	-1.08396	1.90174	0.740801	-1.18478	1	-	pfam03690, UPF0160, Uncharacterized protein family (UPF0160). This family of proteins contains a large number of metal binding residues. The patterns are suggestive of a phosphoesterase function. The conserved DHH motif may mean this family is related to pfam01368. 5.07e-119	-	KOG2948, KOG2948, KOG2948, Predicted metal-binding protein [General function prediction only]. 1.29e-106	sp|Q58DG1|MYG1_BOVIN UPF0160 protein MYG1, mitochondrial OS=Bos taurus PE=2 SV=1 1.26e-96	GO:0003674, molecular_function;GO:0003824, catalytic activity;GO:0005575, cellular_component;GO:0005622, intracellular;GO:0005623, cell;GO:0005634, nucleus;GO:0005737, cytoplasm;GO:0005739, mitochondrion;GO:0016787, hydrolase activity;GO:0043226, organelle;GO:0043227, membrane-bounded organelle;GO:0043229, intracellular organelle;GO:0043231, intracellular membrane-bounded organelle;GO:0044424, in…	XP_002711173.1 MYG1 exonuclease [Oryctolagus cuniculus] 2.46e-104	-
TRINITY_DN14509_c0_g1	1.08599	0.74837	1.1914	-0.394649	-0.551941	-0.499964	-0.551941	-0.551941	-0.475322	1	-	-	-	-	sp|P08159|HDNO_ARTOX 6-hydroxy-D-nicotine oxidase OS=Arthrobacter oxydans PE=1 SV=2 4.33e-12	-	CAF1145427.1 unnamed protein product [Adineta ricciae] 3.19e-24	-
TRINITY_DN14522_c0_g1	1.2626	1.59062	1.21237	-0.0252408	-1.0984	-0.908506	-0.407035	-1.0984	-0.528005	1	cd02892, SQCY_1, Squalene cyclase (SQCY) domain subgroup 1; found in class II terpene cyclases that have an alpha 6 - alpha 6 barrel fold. Squalene cyclase (SQCY) and 2,3-oxidosqualene cyclase (OSQCY) are integral membrane proteins that catalyze a cationic cyclization cascade converting linear triterpenes to fused ring compounds. This group contains bacterial SQCY which catalyzes the convertion o…	pfam13243, SQHop_cyclase_C, Squalene-hopene cyclase C-terminal domain. Squalene-hopene cyclase, EC:5.4.99.17, catalyzes the cyclisation of squalene into hopene in bacteria. This reaction is part of a cationic cyclisation cascade, which is homologous to a key step in cholesterol biosynthesis. This family is the C-terminal half of the molecule. 9.71e-43	K06045-ko00909 Sesquiterpenoid and triterpenoid biosynthesis	KOG0497, KOG0497, KOG0497, Oxidosqualene-lanosterol cyclase and related proteins [Lipid transport and metabolism]. 4.09e-07	sp|P33247|SQHC_ALIAD Squalene--hopene cyclase OS=Alicyclobacillus acidocaldarius subsp. acidocaldarius (strain ATCC 27009 / DSM 446 / JCM 5260 / NBRC 15652 / NCIMB 11725 / NRRL B-14509 / 104-1A) GN=shc PE=1 SV=4 6.71e-42	-	MCL4139138.1 hypothetical protein [Idotea baltica] 1.74e-37	-
TRINITY_DN14527_c0_g1	0.28446	0.424765	1.27941	-0.957988	-1.44778	-0.895976	1.0253	0.404501	-0.116688	1	-	pfam03663, Glyco_hydro_76, Glycosyl hydrolase family 76. Family of alpha-1,6-mannanases. 2.36e-141	-	-	sp|P36091|DCW1_YEAST Mannan endo-1,6-alpha-mannosidase DCW1 OS=Saccharomyces cerevisiae (strain ATCC 204508 / S288c) GN=DCW1 PE=1 SV=1 6.02e-126	-	KAJ3029194.1 hydrolase 76 protein [Siphonaria sp. JEL0065] 2.92e-19	-
TRINITY_DN14596_c0_g1	0.322453	0.655943	1.26041	-0.517771	-0.851769	-1.22179	1.04643	0.307558	-1.00147	1	-	-	-	-	sp|A2RAR6|EXGA_ASPNC Probable glucan 1,3-beta-glucosidase A OS=Aspergillus niger (strain CBS 513.88 / FGSC A1513) GN=exgA PE=3 SV=1 7.41e-20	-	GAV01895.1 hypothetical protein RvY_12533 [Ramazzottius varieornatus] 2.05e-20	-
TRINITY_DN14669_c0_g1	-0.169945	0.385498	1.94679	-0.306665	-1.65739	-1.0491	1.4215	0.283478	-0.854179	1	-	-	-	-	-	-	-	-
TRINITY_DN147_c0_g2	0.963566	2.27051	1.72974	-0.818921	-1.10386	-0.915469	-0.574438	-0.447276	-1.10386	1	-	-	-	-	-	-	-	-
TRINITY_DN1551_c0_g1	-0.157046	-0.183372	1.27649	-0.960168	-0.729876	-1.54293	1.99598	1.106	-0.805083	1	-	-	-	-	-	-	-	-
TRINITY_DN1589_c0_g1	0.737564	0.948666	0.857902	-0.705469	-1.1265	-0.818107	0.703074	0.217631	-0.814764	1	cd12148, fungal_TF_MHR, fungal transcription factor regulatory middle homology region. This domain is present in the large family of fungal zinc cluster transcription factors that contain an N-terminal GAL4-like C6 zinc binuclear cluster DNA-binding domain. Examples of members of this large fungal group are the following Saccharomyces cerevisiae transcription factors, GAL4, STB5, DAL81, CAT8, RDR…	-	-	-	-	-	-	-
TRINITY_DN15937_c0_g1	0.674942	0.934692	2.17637	-1.43544	-1.0626	-1.51271	1.56633	0.0665407	-1.40812	1	cd00779, ProRS_core_prok, Prolyl-tRNA synthetase (ProRS) class II core catalytic domain. ProRS is a homodimer. It is responsible for the attachment of proline to the 3' OH group of ribose of the appropriate tRNA. This domain is primarily responsible for ATP-dependent formation of the enzyme bound aminoacyl-adenylate. Class II assignment is based upon its structure and the presence of three charac…	-	K01881-ko00970 Aminoacyl-tRNA biosynthesis	KOG2324, KOG2324, KOG2324, Prolyl-tRNA synthetase [Translation, ribosomal structure and biogenesis]. 1.59e-29	sp|A0L8I2|SYP_MAGMM Proline--tRNA ligase OS=Magnetococcus marinus (strain ATCC BAA-1437 / JCM 17883 / MC-1) GN=proS PE=3 SV=1 7.07e-97	GO:0003674, molecular_function;GO:0003824, catalytic activity;GO:0004812, aminoacyl-tRNA ligase activity;GO:0004827, proline-tRNA ligase activity;GO:0005575, cellular_component;GO:0005622, intracellular;GO:0005623, cell;GO:0005737, cytoplasm;GO:0005739, mitochondrion;GO:0006082, organic acid metabolic process;GO:0006139, nucleobase-containing compound metabolic process;GO:0006399, tRNA metabolic …	XP_022186091.2 LOW QUALITY PROTEIN: probable proline--tRNA ligase, mitochondrial [Nilaparvata lugens] 4.61e-144	-
TRINITY_DN16184_c0_g1	0.217511	0.531453	1.28363	-1.14813	-0.832228	-1.26267	1.45418	0.349166	-0.592909	1	-	-	-	-	-	-	-	-
TRINITY_DN16194_c0_g1	1.67951	2.02848	1.08363	-0.334617	-0.952076	-0.952076	-0.952076	-0.952076	-0.648692	1	-	-	-	-	-	-	-	-
TRINITY_DN16570_c0_g1	0.0260821	2.38562	1.80243	-1.43255	-1.43255	-1.43255	0.511152	-0.429065	0.00143312	1	-	-	-	-	-	-	-	-
TRINITY_DN16734_c0_g1	0.378806	0.234128	1.66457	-0.65198	-1.39106	-1.27104	0.50287	0.604157	-0.07046	1	-	-	-	-	-	-	-	-
TRINITY_DN16937_c0_g1	1.51395	0.737166	1.0442	-0.549219	-0.549219	-0.549219	-0.549219	-0.549219	-0.549219	1	-	-	-	-	-	-	-	-
TRINITY_DN178_c0_g1	0.464912	0.626016	1.18349	-0.723643	-1.74772	-1.22438	1.91679	0.5816	-1.07707	1	-	pfam08498, Sterol_MT_C, Sterol methyltransferase C-terminal. This domain is found to the C-terminus of a methyltransferase domain (pfam08241) in fungal and plant sterol methyltransferases. 1.23e-19	K00559-ko00100 Steroid biosynthesis	KOG1269, KOG1269, KOG1269, SAM-dependent methyltransferases [Lipid transport and metabolism, General function prediction only]. 3.27e-56	sp|Q9P3R1|ERG6_NEUCR Sterol 24-C-methyltransferase erg-4 OS=Neurospora crassa (strain ATCC 24698 / 74-OR23-1A / CBS 708.71 / DSM 1257 / FGSC 987) GN=erg-4 PE=3 SV=1 0.0	GO:0003674, molecular_function;GO:0003824, catalytic activity;GO:0005575, cellular_component;GO:0005622, intracellular;GO:0005623, cell;GO:0005737, cytoplasm;GO:0008150, biological_process;GO:0008152, metabolic process;GO:0008168, methyltransferase activity;GO:0008757, S-adenosylmethionine-dependent methyltransferase activity;GO:0016740, transferase activity;GO:0016741, transferase activity, tran…	KAJ3615724.1 hypothetical protein Zmor_012353 [Zophobas morio] 3.45e-80	-
TRINITY_DN18382_c0_g1	0.899075	1.28093	2.37568	-0.938092	-1.70925	-1.06162	0.881536	-0.0598887	-1.66837	1	cd00770, SerRS_core, Seryl-tRNA synthetase (SerRS) class II core catalytic domain. SerRS is responsible for the attachment of serine to the 3' OH group of ribose of the appropriate tRNA. This domain It is primarily responsible for ATP-dependent formation of the enzyme bound aminoacyl-adenylate. Class II assignment is based upon its structure and the presence of three characteristic sequence motif…	pfam00587, tRNA-synt_2b, tRNA synthetase class II core domain (G, H, P, S and T). tRNA-synt_2b is a family of largely threonyl-tRNA members. 4.63e-09	K01875-ko00970 Aminoacyl-tRNA biosynthesis	KOG2509, KOG2509, KOG2509, Seryl-tRNA synthetase [Translation, ribosomal structure and biogenesis]. 3.82e-66	sp|P38705|SYSM_YEAST Serine--tRNA ligase, mitochondrial OS=Saccharomyces cerevisiae (strain ATCC 204508 / S288c) GN=DIA4 PE=1 SV=1 9.91e-80	GO:0000166, nucleotide binding;GO:0000959, mitochondrial RNA metabolic process;GO:0003674, molecular_function;GO:0003824, catalytic activity;GO:0004812, aminoacyl-tRNA ligase activity;GO:0004828, serine-tRNA ligase activity;GO:0005488, binding;GO:0005524, ATP binding;GO:0005575, cellular_component;GO:0005622, intracellular;GO:0005623, cell;GO:0005737, cytoplasm;GO:0005739, mitochondrion;GO:000608…	XP_039275160.1 LOW QUALITY PROTEIN: serine--tRNA ligase, mitochondrial-like [Nilaparvata lugens] 2.69e-182	-
TRINITY_DN18497_c0_g1	0.602672	0.53275	0.894585	-0.525811	-0.539086	-0.637405	0.45435	-0.163853	-0.6182	1	-	-	-	-	-	-	-	-
TRINITY_DN18705_c0_g1	0.636673	0.928147	2.04489	-0.771158	-0.87546	-0.886735	1.1278	-0.436157	-1.768	1	-	-	K06126-ko00130 Ubiquinone and other terpenoid-quinone biosynthesis	KOG3855, KOG3855, KOG3855, Monooxygenase involved in coenzyme Q (ubiquinone) biosynthesis [Coenzyme transport and metabolism, Energy production and conversion]. 2.79e-101	sp|Q9Y7Z9|COQ6_SCHPO Ubiquinone biosynthesis monooxygenase COQ6, mitochondrial OS=Schizosaccharomyces pombe (strain 972 / ATCC 24843) GN=coq6 PE=3 SV=2 1.62e-113	GO:0003674, molecular_function;GO:0003824, catalytic activity;GO:0004497, monooxygenase activity;GO:0005575, cellular_component;GO:0005622, intracellular;GO:0005623, cell;GO:0005737, cytoplasm;GO:0005739, mitochondrion;GO:0005740, mitochondrial envelope;GO:0005743, mitochondrial inner membrane;GO:0006732, coenzyme metabolic process;GO:0006733, oxidoreduction coenzyme metabolic process;GO:0006743,…	KAJ3029856.1 putative ubiquinone biosynthesis monooxygenase [Siphonaria sp. JEL0065] 5.31e-96	-
TRINITY_DN189_c0_g1	1.27374	1.13643	0.513787	0.268927	-0.70627	-0.565192	-0.70627	-0.70627	-0.508876	1	-	-	-	-	-	-	-	-
TRINITY_DN1896_c0_g1	-0.78465	-0.0482908	1.58796	-1.44493	-0.910433	-0.581686	1.98246	0.84815	-0.648579	1	-	pfam06985, HET, Heterokaryon incompatibility protein (HET). This family represents a conserved region approximately 150 residues long within various heterokaryon incompatibility proteins that seem to be restricted to ascomycete fungi. Genetic differences in specific het genes prevent a viable heterokaryotic fungal cell from being formed by the fusion of filaments from two different wild-type stra…	-	-	sp|Q9UV10|HET6_NEUCR Heterokaryon incompatibility protein 6, OR allele OS=Neurospora crassa (strain ATCC 24698 / 74-OR23-1A / CBS 708.71 / DSM 1257 / FGSC 987) GN=het-6 PE=4 SV=1 1.54e-15	-	KAI1691421.1 heterokaryon incompatibility protein (HET) domain-containing protein [Ditylenchus destructor] 4.10e-24	-
TRINITY_DN1930_c0_g1	1.05976	1.15342	1.00327	-0.274273	-1.12321	-2.00549	0.186683	-0.0131612	0.0130004	1	-	-	-	-	-	-	-	-
TRINITY_DN1948_c0_g1	0.459352	0.482526	1.36083	-1.08664	-1.19118	-0.968131	1.41056	0.401029	-0.868342	1	-	-	-	-	-	-	-	-
TRINITY_DN19756_c0_g1	0.864352	1.18098	1.55725	-0.083359	-0.703846	-0.703846	-0.703846	-0.703846	-0.703846	1	-	-	-	-	-	-	-	-
TRINITY_DN20836_c0_g1	1.93311	2.18622	1.66463	-1.00348	-1.00348	-1.00348	-1.00348	-1.00348	-0.766561	1	-	-	-	-	-	-	-	-
TRINITY_DN20972_c0_g1	-0.153873	0.259507	1.59734	-1.14088	-0.82647	-1.30557	1.90981	0.463697	-0.803563	1	-	pfam18972, Wheel, Cns1/TTC4 Wheel domain. The wheel domain is found at the C-terminus of yeast Cns1 and human TTC4 proteins. The structure of the domain shows an overall fold consisting of a twisted five-stranded beta sheet surrounded by several alpha helices. The Hsp90 chaperone machinery in eukaryotes comprises a number of distinct accessory factors. Cns1 is one of the few essential co-chaperon…	-	KOG0551, KOG0551, KOG0551, Hsp90 co-chaperone CNS1 (contains TPR repeats) [Posttranslational modification, protein turnover, chaperones]. 3.35e-40	sp|O13754|CNS1_SCHPO Hsp70/Hsp90 co-chaperone cns1 OS=Schizosaccharomyces pombe (strain 972 / ATCC 24843) GN=cns1 PE=3 SV=1 1.51e-53	GO:0003674, molecular_function;GO:0005488, binding;GO:0005515, protein binding;GO:0005575, cellular_component;GO:0005622, intracellular;GO:0005623, cell;GO:0005737, cytoplasm;GO:0006457, protein folding;GO:0008150, biological_process;GO:0009987, cellular process;GO:0030544, Hsp70 protein binding;GO:0031072, heat shock protein binding;GO:0032991, protein-containing complex;GO:0043021, ribonucleopr…	KAJ3019779.1 hypothetical protein HDU68_010508 [Siphonaria sp. JEL0065] 1.26e-40	-
TRINITY_DN21281_c0_g1	0.203024	2.60826	0.36222	-0.556376	-0.556376	-0.391623	-0.556376	-0.556376	-0.556376	1	-	-	-	-	-	-	-	-
TRINITY_DN21458_c0_g1	1.53749	1.47217	1.17556	0.485372	-1.75253	-0.240644	-0.974387	-0.640747	-1.06228	1	-	-	-	-	-	-	-	-
TRINITY_DN2191_c0_g1	0.174984	0.19531	1.64082	-1.35305	-0.79767	-1.69047	1.65404	0.700761	-0.524725	1	-	-	-	-	-	-	XP_053566315.1 EEF1A lysine methyltransferase 4 isoform X1 [Bombina bombina] 6.72e-11	-
TRINITY_DN22019_c0_g1	0.70919	2.69038	1.27924	-0.607925	-0.814177	-0.814177	-0.814177	-0.814177	-0.814177	1	-	-	-	-	-	-	-	-
TRINITY_DN2246_c0_g1	1.35567	1.47732	1.20489	-0.132579	-0.844216	-0.0395847	-0.912002	-0.805533	-1.30397	1	-	-	-	-	-	-	-	-
TRINITY_DN23271_c0_g1	0.379606	0.492031	1.74947	-0.974675	-0.903379	-1.02986	1.20739	-0.0670568	-0.853531	1	cd14069, STKc_Chk1, Catalytic domain of the Serine/Threonine kinase, Checkpoint kinase 1. STKs catalyze the transfer of the gamma-phosphoryl group from ATP to serine/threonine residues on protein substrates. Chk1 is implicated in many major checkpoints of the cell cycle, providing a link between upstream sensors and the cell cycle engine. It plays an important role in DNA damage response and main…	pfam07714, Pkinase_Tyr, Protein tyrosine kinase. 2.64e-15	K02216-ko04111 Cell cycle - yeast;ko04115 p53 signaling pathway;ko04110 Cell cycle;ko04113 Meiosis - yeast	KOG0583, KOG0583, KOG0583, Serine/threonine protein kinase [Signal transduction mechanisms]. 5.36e-50	sp|P34208|CHK1_SCHPO Serine/threonine-protein kinase chk1 OS=Schizosaccharomyces pombe (strain 972 / ATCC 24843) GN=chk1 PE=1 SV=2 2.18e-112	GO:0000003, reproduction;GO:0000075, cell cycle checkpoint;GO:0000076, DNA replication checkpoint;GO:0000077, DNA damage checkpoint;GO:0000166, nucleotide binding;GO:0000228, nuclear chromosome;GO:0000278, mitotic cell cycle;GO:0000785, chromatin;GO:0000790, nuclear chromatin;GO:0003674, molecular_function;GO:0003824, catalytic activity;GO:0004672, protein kinase activity;GO:0004674, protein seri…	XP_031569226.1 serine/threonine-protein kinase Chk1-like [Actinia tenebrosa] 1.17e-61	-
TRINITY_DN23374_c0_g1	0.738159	1.07271	0.907648	-0.347794	-0.545685	-0.18798	-0.545685	-0.545685	-0.545685	1	cd11062, CYP58-like, cytochrome P450 family 58-like fungal cytochrome P450s. This group includes Fusarium sporotrichioides cytochrome P450 58 (CYP58, also known as Tri4 and trichodiene oxygenase), and similar fungal proteins. CYP58 catalyzes the oxygenation of trichodiene during the biosynthesis of trichothecenes, which are sesquiterpenoid toxins that act by inhibiting protein biosynthesis. The C…	-	-	-	sp|Q12612|TRI4_FUSSP Trichodiene oxygenase OS=Fusarium sporotrichioides GN=TRI4 PE=3 SV=1 2.40e-34	-	-	-
TRINITY_DN23523_c0_g1	2.0507	1.61852	0.919408	-0.470515	-0.938915	-0.362451	-0.938915	-0.938915	-0.938915	1	-	-	-	-	-	-	-	-
TRINITY_DN23560_c0_g1	0.769919	0.732702	0.886938	-0.371755	-0.923136	-0.178701	0.250659	-0.363543	-0.803082	1	-	-	-	-	sp|Q10327|YD72_SCHPO Uncharacterized protein C32A11.02c OS=Schizosaccharomyces pombe (strain 972 / ATCC 24843) GN=SPAC32A11.02c PE=4 SV=1 3.14e-12	-	-	-
TRINITY_DN23855_c0_g1	0.699802	0.878621	1.22323	-0.731844	-1.13632	-0.274459	0.135457	-0.232409	-0.562081	1	cd18617, GH43_XynB-like, Glycosyl hydrolase family 43, such as Bacteroides ovatus alpha-L-arabinofuranosidase (BoGH43, XynB). This glycosyl hydrolase family 43 (GH43) subgroup includes enzymes that have been characterized to have alpha-L-arabinofuranosidase (EC 3.2.1.55) and beta-1,4-xylosidase (beta-D-xylosidase;xylan 1,4-beta-xylosidase; EC 3.2.1.37) activities. Beta-1,4-xylosidases are part of…	pfam04616, Glyco_hydro_43, Glycosyl hydrolases family 43. The glycosyl hydrolase family 43 contains members that are arabinanases. Arabinanases hydrolyze the alpha-1,5-linked L-arabinofuranoside backbone of plant cell wall arabinans. The structure of arabinanase Arb43A from Cellvibrio japonicus reveals a five-bladed beta-propeller fold. A long V-shaped groove, partially enclosed at one end, forms…	K14617-ko04977 Vitamin digestion and absorption	-	sp|A4RE85|LMBD1_MAGO7 Probable lysosomal cobalamin transporter OS=Magnaporthe oryzae (strain 70-15 / ATCC MYA-4617 / FGSC 8958) GN=MGG_00740 PE=3 SV=1 5.78e-173	-	XP_033123682.1 probable lysosomal cobalamin transporter [Anneissia japonica] 5.81e-60	-
TRINITY_DN23984_c0_g1	1.61624	1.31995	0.973056	-0.333875	-1.10664	-1.08381	-0.373342	-0.721368	-0.290206	1	-	-	-	-	-	-	-	-
TRINITY_DN25303_c0_g1	1.96875	2.00486	0.988958	-0.611306	-0.524001	-0.497641	-1.10987	-1.10987	-1.10987	1	-	-	-	-	-	-	-	-
TRINITY_DN25598_c0_g1	1.32353	1.00323	1.25789	-0.501041	-0.716215	-0.624792	-0.871941	-0.5404	-0.330253	1	-	-	-	-	-	-	-	-
TRINITY_DN25843_c0_g1	1.28201	1.45087	1.03971	-0.488768	-0.79466	-0.254342	-0.205767	-1.01445	-1.01461	1	cd01853, Toc34_like, Translocon at the Outer-envelope membrane of Chloroplasts 34-like (Toc34-like). The Toc34-like (Translocon at the Outer-envelope membrane of Chloroplasts) family contains several Toc proteins, including Toc34, Toc33, Toc120, Toc159, Toc86, Toc125, and Toc90. The Toc complex at the outer envelope membrane of chloroplasts is a molecular machine of ~500 kDa that contains a singl…	-	-	-	-	-	-	-
TRINITY_DN25865_c0_g1	0.993348	1.18666	1.73785	-0.970041	-1.77739	-1.27875	0.379289	-0.15338	-0.117582	1	-	pfam04707, PRELI, PRELI-like family. This family includes a conserved region found in the PRELI protein and yeast YLR168C gene MSF1 product. The function of this protein is unknown, though it is thought to be involved in intra-mitochondrial protein sorting. This region is also found in a number of other eukaryotic proteins. 4.84e-11	K02619-ko00790 Folate biosynthesis	KOG3336, KOG3336, KOG3336, Predicted member of the intramitochondrial sorting protein family [Intracellular trafficking, secretion, and vesicular transport]. 6.64e-16	sp|Q05776|UPS1_YEAST Protein UPS1, mitochondrial OS=Saccharomyces cerevisiae (strain ATCC 204508 / S288c) GN=UPS1 PE=1 SV=1 2.63e-16	-	XP_039437753.1 protein preli-like [Culex pipiens pallens] 2.22e-09	-
TRINITY_DN25907_c0_g1	-0.0136237	0.201683	1.72216	-0.830795	-1.2964	-1.06131	1.62685	0.705676	-1.05424	1	cd02585, HAD_PMM, phosphomannomutase, similar to human PMM1 and PMM2, Saccharomyces Sec53p, and Arabidopsis thaliana PMM. PMM catalyzes the interconversion of mannose-6-phosphate (M6P) to mannose-1-phosphate (M1P); the conversion of M6P to M1P is an essential step in mannose activation and the biosynthesis of glycoconjugates in all eukaryotes. M1P is the substrate for the synthesis of GDP-mannose…	pfam03332, PMM, Eukaryotic phosphomannomutase. This enzyme EC:5.4.2.8 is involved in the synthesis of the GDP-mannose and dolichol-phosphate-mannose required for a number of critical mannosyl transfer reactions. 6.02e-08	-	KOG3189, KOG3189, KOG3189, Phosphomannomutase [Lipid transport and metabolism]. 7.19e-12	sp|Q8SVM5|PMM_ENCCU Phosphomannomutase OS=Encephalitozoon cuniculi (strain GB-M1) GN=SEC53 PE=1 SV=1 2.37e-14	-	PAV69383.1 hypothetical protein WR25_24099 [Diploscapter pachys] 8.59e-122	-
TRINITY_DN25925_c0_g1	0.758883	1.22118	0.919616	-0.326769	-0.60789	-0.320417	-0.704938	-0.594874	-0.344793	1	-	-	-	-	sp|P27643|SP5K_BACSU Stage V sporulation protein K OS=Bacillus subtilis (strain 168) GN=spoVK PE=2 SV=3 5.22e-12	-	CAH0387796.1 unnamed protein product [Bemisia tabaci] 5.89e-143	-
TRINITY_DN26606_c0_g1	1.227	1.59278	2.50472	-1.52053	-1.69181	-1.53729	0.505215	-0.528909	-0.551182	1	-	-	-	-	-	-	KAJ3017480.1 hypothetical protein HDU68_011678 [Siphonaria sp. JEL0065] 1.61e-08	-
TRINITY_DN2695_c0_g1	1.44301	1.12272	0.906326	-0.0973719	-1.43977	-0.917159	-0.131647	-0.515935	-0.370166	1	cd03188, GST_C_Beta, C-terminal, alpha helical domain of Class Beta Glutathione S-transferases. Glutathione S-transferase (GST) C-terminal domain family, Class Beta subfamily; GSTs are cytosolic dimeric proteins involved in cellular detoxification by catalyzing the conjugation of glutathione (GSH) with a wide range of endogenous and xenobiotic alkylating agents, including carcinogens, therapeutic…	-	K00799-ko00480 Glutathione metabolism;ko00980 Metabolism of xenobiotics by cytochrome P450;ko00982 Drug metabolism - cytochrome P450	-	sp|P44521|GST_HAEIN Glutathione S-transferase OS=Haemophilus influenzae (strain ATCC 51907 / DSM 11121 / KW20 / Rd) GN=gst PE=3 SV=1 4.56e-13	-	KAF5271644.1 hypothetical protein FQR65_LT05265 [Abscondita terminalis] 2.56e-11	-
TRINITY_DN277_c0_g1	0.401272	0.762403	2.53452	-0.264502	-2.65387	-1.12423	0.835666	-0.0326993	-0.458562	1	-	-	-	-	-	-	-	-
TRINITY_DN2916_c0_g1	1.11349	0.949642	0.691168	-0.419571	-0.804707	-0.314401	0.241505	-0.531259	-0.925867	1	cd20071, SET_SMYD, SET domain (including SET domain and post-SET domain) found in SET and MYND domain-containing protein, and similar proteins. The family includes SET and MYND domain-containing proteins, SMYD1-SYMD5. SMYD1 (EC 2.1.1.43; also termed BOP) is a heart and muscle specific SET-MYND domain containing protein, which functions as a histone methyltransferase and regulates downstream gene …	-	-	-	sp|O74467|SET5_SCHPO SET domain-containing protein 5 OS=Schizosaccharomyces pombe (strain 972 / ATCC 24843) GN=set5 PE=1 SV=1 3.14e-46	-	CAF0710285.1 unnamed protein product [Brachionus calyciflorus] 8.88e-30	-
TRINITY_DN2996_c0_g1	1.01729	2.29741	0.336196	-0.566133	-1.43196	-0.875167	-0.553701	-0.412005	0.188075	1	-	-	-	-	-	-	-	-
TRINITY_DN3228_c0_g1	0.927403	1.55049	0.965063	-0.582777	-1.27155	-0.819097	0.192301	-0.312429	-0.6494	1	cd12188, SDH, Saccharopine Dehydrogenase NAD-binding and catalytic domains. Saccharopine Dehydrogenase (SDH) catalyzes the final step in the reversible NAD-dependent oxidative deamination of saccharopine to alpha-ketoglutarate and lysine, in the alpha-aminoadipate pathway of L-lysine biosynthesis. SHD is structurally related to formate dehydrogenase and similar enzymes, having a 2-domain structur…	-	K00290-ko01230 Biosynthesis of amino acids;ko00300 Lysine biosynthesis;ko00310 Lysine degradation	KOG0172, KOG0172, KOG0172, Lysine-ketoglutarate reductase/saccharopine dehydrogenase [Amino acid transport and metabolism]. 5.46e-11	sp|Q7SFX6|LYS1_NEUCR Saccharopine dehydrogenase [NAD(+), L-lysine-forming] OS=Neurospora crassa (strain ATCC 24698 / 74-OR23-1A / CBS 708.71 / DSM 1257 / FGSC 987) GN=NCU03118 PE=3 SV=1 5.61e-112	GO:0003674, molecular_function;GO:0003676, nucleic acid binding;GO:0003723, RNA binding;GO:0003729, mRNA binding;GO:0003824, catalytic activity;GO:0004753, saccharopine dehydrogenase activity;GO:0004754, saccharopine dehydrogenase (NAD+, L-lysine-forming) activity;GO:0005488, binding;GO:0005575, cellular_component;GO:0005622, intracellular;GO:0005623, cell;GO:0005737, cytoplasm;GO:0006082, organi…	KAJ3025773.1 Saccharopine dehydrogenase [Siphonaria sp. JEL0065] 8.50e-102	-
TRINITY_DN336_c0_g1	-0.283289	-0.213524	1.50529	-1.3392	-0.834	-0.887998	1.81352	0.734495	-0.495285	1	-	pfam01613, Flavin_Reduct, Flavin reductase like domain. This is a flavin reductase family consisting of enzymes known to be flavin reductases as well as various oxidoreductase and monooxygenase components. VlmR is a flavin reductase that functions in a two-component enzyme system to provide isobutylamine N-hydroxylase with reduced flavin and may be involved in the synthesis of valanimycin. SnaC i…	-	-	-	-	-	-
TRINITY_DN3460_c0_g1	1.19302	1.37039	1.66825	0.178888	-2.72331	-0.746235	-0.554292	-0.0889217	-0.297789	1	sd00017, ZF_C2H2, Zinc finger, C2H2 type. The C2H2 zinc finger is a classical zinc finger domain. C2H2-type zinc fingers are ubiquitous; more than 1% of all mammalian proteins are predicted to contain at least one zinc finger. They often function as DNA or protein binding structural motifs, such as in eukaryotic transcription factors, and therefore they play important roles in cellular processes …	-	-	KOG2462, KOG2462, KOG2462, C2H2-type Zn-finger protein [Transcription]. 3.32e-11	sp|O14258|ACE2_SCHPO Metallothionein expression activator OS=Schizosaccharomyces pombe (strain 972 / ATCC 24843) GN=ace2 PE=3 SV=1 1.69e-30	GO:0000082, G1/S transition of mitotic cell cycle;GO:0000083, regulation of transcription involved in G1/S transition of mitotic cell cycle;GO:0000278, mitotic cell cycle;GO:0000280, nuclear division;GO:0000976, transcription regulatory region sequence-specific DNA binding;GO:0000977, RNA polymerase II regulatory region sequence-specific DNA binding;GO:0000978, RNA polymerase II proximal promoter…	-	-
TRINITY_DN3505_c0_g1	0.720256	0.860381	1.09226	-0.79453	-0.919524	-0.823116	0.752511	0.177919	-1.06616	1	-	-	-	-	-	-	-	-
TRINITY_DN3551_c0_g1	-0.154656	0.174887	1.64407	-0.820585	-0.90594	-0.671671	1.21586	0.354082	-0.836043	1	cd19203, SET_SMYD3, SET domain (including post-SET domain) found in SET and MYND domain-containing protein 3 (SMYD3) and similar proteins. SMYD3 (also termed zinc finger MYND domain-containing protein 1) functions as a histone methyltransferase that specifically methylates 'Lys-4' of histone H3, inducing di- and tri-methylation, but not monomethylation. It also methylates 'Lys-5' of histone H4. S…	-	-	KOG2084, KOG2084, KOG2084, Predicted histone tail methylase containing SET domain [Chromatin structure and dynamics]. 6.33e-13	sp|Q7XJS0|ASHR1_ARATH Histone-lysine N-methyltransferase ASHR1 OS=Arabidopsis thaliana GN=ASHR1 PE=2 SV=2 5.08e-30	GO:0000228, nuclear chromosome;GO:0000785, chromatin;GO:0000790, nuclear chromatin;GO:0003674, molecular_function;GO:0003824, catalytic activity;GO:0005575, cellular_component;GO:0005622, intracellular;GO:0005623, cell;GO:0005634, nucleus;GO:0005694, chromosome;GO:0006325, chromatin organization;GO:0006464, cellular protein modification process;GO:0006479, protein methylation;GO:0006807, nitrogen…	XP_041481801.1 histone-lysine N-methyltransferase SMYD3-like [Lytechinus variegatus] 1.68e-26	-
TRINITY_DN3948_c0_g1	1.41191	1.27556	1.90891	0.542457	-1.71021	-0.837798	-1.04556	-1.11432	-0.430962	1	-	-	-	-	-	-	CAF0727211.1 unnamed protein product [Adineta steineri] >CAF3821552.1 unnamed protein product [Adineta steineri] 3.21e-209	-
TRINITY_DN4058_c0_g2	-0.498541	0.0306989	1.15119	-0.526971	-1.23045	-1.06383	1.91225	0.67781	-0.452156	1	-	-	-	-	-	-	-	-
TRINITY_DN4073_c0_g1	1.23285	0.717798	1.41983	-0.769877	-1.06792	-1.01614	0.220285	-0.133923	-0.602902	1	-	-	-	-	-	-	-	-
TRINITY_DN4157_c0_g1	0.813398	0.868567	1.10429	-0.422397	-1.42828	-1.14169	0.887975	-0.00366095	-0.678201	1	cd07521, HAD_FCP1-like, human CTD phosphatase subunit 1 (CTDP1/FCP1) and related proteins; belongs to the haloacid dehalogenase-like superfamily. Human CTDP1/FCP1 is a protein phosphatase which dephosphorylates the phosphorylated C terminus (CTD) of RNA polymerase II. CTD phosphorylation is a key mechanism of regulation of gene expression in eukaryotes. CTDP1/FCP1 may have other roles in in trans…	pfam03031, NIF, NLI interacting factor-like phosphatase. This family contains a number of NLI interacting factor isoforms and also an N-terminal regions of RNA polymerase II CTC phosphatase and FCP1 serine phosphatase. This region has been identified as the minimal phosphatase domain. 1.02e-28	-	KOG2832, KOG2832, KOG2832, TFIIF-interacting CTD phosphatase, including NLI-interacting factor (involved in RNA polymerase II regulation) [Transcription]. 4.43e-43	sp|Q4I099|TIM50_GIBZE Mitochondrial import inner membrane translocase subunit TIM50 OS=Gibberella zeae (strain PH-1 / ATCC MYA-4620 / FGSC 9075 / NRRL 31084) GN=TIM50 PE=3 SV=1 0.0	GO:0003674, molecular_function;GO:0003824, catalytic activity;GO:0004721, phosphoprotein phosphatase activity;GO:0005048, signal sequence binding;GO:0005488, binding;GO:0005575, cellular_component;GO:0005622, intracellular;GO:0005623, cell;GO:0005737, cytoplasm;GO:0005739, mitochondrion;GO:0005740, mitochondrial envelope;GO:0005743, mitochondrial inner membrane;GO:0005744, mitochondrial inner mem…	XP_003386476.1 PREDICTED: mitochondrial import inner membrane translocase subunit TIM50-A-like [Amphimedon queenslandica] 8.20e-48	-
TRINITY_DN427_c0_g1	1.93202	1.0153	1.86475	0.499107	-2.2777	-0.93152	-1.57177	-0.897508	0.367329	1	-	-	-	-	-	-	-	-
TRINITY_DN4336_c0_g1	0.620162	0.942335	1.47325	-1.12742	-1.00401	-1.44153	1.38645	0.28874	-1.13798	1	cd00609, AAT_like, Aspartate aminotransferase family. This family belongs to pyridoxal phosphate (PLP)-dependent aspartate aminotransferase superfamily (fold I). Pyridoxal phosphate combines with an alpha-amino acid to form a compound called a Schiff base or aldimine intermediate, which depending on the reaction, is the substrate in four kinds of reactions (1) transamination (movement of amino gr…	pfam00155, Aminotran_1_2, Aminotransferase class I and II. 1.17e-23	K00817-ko00350 Tyrosine metabolism;ko00360 Phenylalanine metabolism;ko00400 Phenylalanine, tyrosine and tryptophan biosynthesis;ko00401 Novobiocin biosynthesis;ko00340 Histidine metabolism;ko00960 Tropane, piperidine and pyridine alkaloid biosynthesis;ko01230 Biosynthesis of amino acids	KOG0633, KOG0633, KOG0633, Histidinol phosphate aminotransferase [Amino acid transport and metabolism]. 3.81e-98	sp|P36605|HIS8_SCHPO Histidinol-phosphate aminotransferase OS=Schizosaccharomyces pombe (strain 972 / ATCC 24843) GN=his3 PE=3 SV=1 8.27e-132	GO:0000105, histidine biosynthetic process;GO:0003674, molecular_function;GO:0003824, catalytic activity;GO:0004400, histidinol-phosphate transaminase activity;GO:0005575, cellular_component;GO:0005622, intracellular;GO:0005623, cell;GO:0005737, cytoplasm;GO:0006082, organic acid metabolic process;GO:0006520, cellular amino acid metabolic process;GO:0006547, histidine metabolic process;GO:0006725…	KAJ3026349.1 histidinol-phosphate transaminase [Siphonaria sp. JEL0065] 3.35e-123	-
TRINITY_DN4386_c0_g1	1.61784	1.47352	0.594903	-0.852791	-0.0969123	-1.04054	-0.65437	-0.566411	-0.475243	1	-	pfam00933, Glyco_hydro_3, Glycosyl hydrolase family 3 N terminal domain. 5.94e-12	K05349-ko00500 Starch and sucrose metabolism;ko00940 Phenylpropanoid biosynthesis;ko00460 Cyanoamino acid metabolism	-	sp|A2QPK4|BGLD_ASPNC Probable beta-glucosidase D OS=Aspergillus niger (strain CBS 513.88 / FGSC A1513) GN=bglD PE=3 SV=2 3.17e-132	-	CAF1521792.1 unnamed protein product [Didymodactylos carnosus] >CAF4380928.1 unnamed protein product [Didymodactylos carnosus] 1.27e-51	-
TRINITY_DN4399_c0_g1	0.483885	0.304384	1.28859	-1.10953	-0.593775	-0.84357	0.996978	0.299378	-0.826342	1	-	-	-	-	-	-	-	-
TRINITY_DN4530_c0_g1	-0.10307	0.609482	1.70715	-0.702514	-1.31344	-0.953753	0.547739	0.291838	-0.0834318	1	-	-	-	-	-	-	-	-
TRINITY_DN4993_c0_g1	0.851199	0.325929	1.96337	-0.586558	-2.10713	-1.54285	1.34585	0.681311	-0.931129	1	-	-	-	-	-	-	-	-
TRINITY_DN5176_c0_g1	0.608883	0.678597	1.82653	-0.41954	-1.53642	-0.758068	0.665344	-0.0785513	-0.986777	1	-	-	-	KOG0768, KOG0768, KOG0768, Mitochondrial carrier protein PET8 [Energy production and conversion]. 4.60e-39	sp|Q4V9P0|SAMC_DANRE S-adenosylmethionine mitochondrial carrier protein OS=Danio rerio GN=slc25a26 PE=2 SV=1 1.66e-39	-	XP_041348608.1 S-adenosylmethionine mitochondrial carrier protein-like [Gigantopelta aegis] 8.80e-43	-
TRINITY_DN5203_c0_g1	0.822436	0.908946	1.0639	-0.38886	-0.356064	-0.459402	-0.592814	-0.592814	-0.405331	1	-	-	-	-	-	-	-	-
TRINITY_DN5206_c0_g1	1.25664	0.867537	1.07732	0.440679	-0.915705	0.0146219	-1.35367	-0.688172	-0.69926	1	-	-	-	-	-	-	-	-
TRINITY_DN5231_c0_g1	-0.000710208	0.721775	1.45776	-0.773833	-0.523203	-0.933606	1.17425	0.179442	-1.30187	1	-	-	-	-	-	-	-	-
TRINITY_DN5325_c0_g1	1.18142	1.75199	1.70189	-1.35552	-0.842943	-2.33237	0.142079	-0.0640761	-0.182471	1	-	-	-	-	-	-	-	-
TRINITY_DN5471_c0_g1	0.881979	1.22434	1.59046	-0.121168	-2.56227	-1.09654	-0.247448	-0.268776	0.599421	1	-	-	-	-	-	-	-	-
TRINITY_DN5478_c0_g1	2.13772	0.853006	0.577472	-0.257573	-0.453466	-0.507929	-0.783078	-0.783078	-0.783078	1	-	-	-	-	-	-	-	-
TRINITY_DN5744_c0_g1	1.2569	1.04905	0.907519	1.14153	-1.77207	-0.224796	-0.93607	-0.948089	-0.473969	1	-	-	-	-	-	-	KAJ3027336.1 hypothetical protein HDU68_003997 [Siphonaria sp. JEL0065] 1.60e-07	-
TRINITY_DN5993_c0_g1	-0.138412	-0.230509	1.05557	-0.652685	-1.22617	-0.983629	2.04189	0.586717	-0.452777	1	cd02892, SQCY_1, Squalene cyclase (SQCY) domain subgroup 1; found in class II terpene cyclases that have an alpha 6 - alpha 6 barrel fold. Squalene cyclase (SQCY) and 2,3-oxidosqualene cyclase (OSQCY) are integral membrane proteins that catalyze a cationic cyclization cascade converting linear triterpenes to fused ring compounds. This group contains bacterial SQCY which catalyzes the convertion o…	pfam13249, SQHop_cyclase_N, Squalene-hopene cyclase N-terminal domain. Squalene-hopene cyclase, EC:5.4.99.17, catalyzes the cyclisation of squalene into hopene in bacteria. This reaction is part of a cationic cyclisation cascade, which is homologous to a key step in cholesterol biosynthesis. This family is the N-terminal domain. 1.39e-18	K01852-ko00100 Steroid biosynthesis	KOG0497, KOG0497, KOG0497, Oxidosqualene-lanosterol cyclase and related proteins [Lipid transport and metabolism]. 6.05e-10	sp|Q96WJ0|ERG7_PNECA Lanosterol synthase OS=Pneumocystis carinii GN=ERG7 PE=2 SV=1 0.0	-	KAJ3027830.1 Lanosterol synthase (Oxidosqualene--lanosterol cyclase) [Siphonaria sp. JEL0065] 2.81e-209	-
TRINITY_DN61_c0_g1	-0.0114536	0.426413	1.72313	-0.587698	-1.17507	-1.20888	1.30434	0.227973	-0.698743	1	cd01086, MetAP1, Methionine Aminopeptidase 1. E.C. 3.4.11.18. Also known as methionyl aminopeptidase and Peptidase M. Catalyzes release of N-terminal amino acids, preferentially methionine, from peptides and arylamides. 3.83e-76	pfam00557, Peptidase_M24, Metallopeptidase family M24. This family contains metallopeptidases. It also contains non-peptidase homologs such as the N terminal domain of Spt16 which is a histone H3-H4 binding module. 4.84e-19	-	KOG2738, KOG2738, KOG2738, Putative methionine aminopeptidase [Posttranslational modification, protein turnover, chaperones]. 3.16e-140	sp|O59730|MAP1_SCHPO Methionine aminopeptidase 1 OS=Schizosaccharomyces pombe (strain 972 / ATCC 24843) GN=fma1 PE=1 SV=1 1.22e-146	GO:0003674, molecular_function;GO:0003676, nucleic acid binding;GO:0003723, RNA binding;GO:0003729, mRNA binding;GO:0003824, catalytic activity;GO:0004177, aminopeptidase activity;GO:0005488, binding;GO:0005575, cellular_component;GO:0005622, intracellular;GO:0005623, cell;GO:0005737, cytoplasm;GO:0005829, cytosol;GO:0005840, ribosome;GO:0006464, cellular protein modification process;GO:0006508, …	XP_046267852.1 methionine aminopeptidase 1 [Scatophagus argus] 1.11e-130	-
TRINITY_DN632_c0_g1	-0.0144742	0.76584	1.63984	-0.579627	-1.17422	-1.4523	1.31918	0.265505	-0.769739	1	-	pfam17050, AIM5, Altered inheritance of mitochondria 5. AIM5 is a fungal mitochondrial inner membrane protein. It is a component of the mitochondrial inner membrane organising system (MINOS/MitOS), which promotes normal mitochondrial morphology. 1.39e-08	-	-	-	-	-	-
TRINITY_DN6373_c0_g1	0.627541	0.686509	1.29947	-0.640677	-1.0372	-0.333275	0.418883	-0.17057	-0.850683	1	cd05600, STKc_Sid2p_like, Catalytic domain of Fungal Sid2p-like Protein Serine/Threonine Kinases. STKs catalyze the transfer of the gamma-phosphoryl group from ATP to serine/threonine residues on protein substrates. This group contains fungal kinases including Schizosaccharomyces pombe Sid2p and Saccharomyces cerevisiae Dbf2p. Group members show similarity to NDR kinases in that they contain an N…	pfam00069, Pkinase, Protein kinase domain. 9.09e-09	-	KOG0605, KOG0605, KOG0605, NDR and related serine/threonine kinases [General function prediction only]. 2.47e-108	sp|Q09898|SID2_SCHPO Serine/threonine-protein kinase sid2 OS=Schizosaccharomyces pombe (strain 972 / ATCC 24843) GN=sid2 PE=1 SV=1 0.0	GO:0000003, reproduction;GO:0000075, cell cycle checkpoint;GO:0000166, nucleotide binding;GO:0000226, microtubule cytoskeleton organization;GO:0000278, mitotic cell cycle;GO:0000280, nuclear division;GO:0000281, mitotic cytokinesis;GO:0000910, cytokinesis;GO:0000917, division septum assembly;GO:0003006, developmental process involved in reproduction;GO:0003674, molecular_function;GO:0003824, cata…	KAJ3022112.1 hypothetical protein HDU68_009311 [Siphonaria sp. JEL0065] 1.22e-136	-
TRINITY_DN6375_c0_g1	0.000444908	0.37179	1.26977	-0.565753	-1.14436	-0.880619	1.21107	0.207529	-0.469869	1	cd00009, AAA, The AAA+ (ATPases Associated with a wide variety of cellular Activities) superfamily represents an ancient group of ATPases belonging to the ASCE (for additional strand, catalytic E) division of the P-loop NTPase fold. The ASCE division also includes ABC, RecA-like, VirD4-like, PilT-like, and SF1/2 helicases. Members of the AAA+ ATPases function as molecular chaperons, ATPase subuni…	-	-	KOG0989, KOG0989, KOG0989, Replication factor C, subunit RFC4 [Replication, recombination and repair]. 2.34e-94	sp|P0C7N7|RFC2_PHANO Replication factor C subunit 2 OS=Phaeosphaeria nodorum (strain SN15 / ATCC MYA-4574 / FGSC 10173) GN=RFC2 PE=3 SV=1 2.08e-161	-	XP_012496542.1 PREDICTED: replication factor C subunit 4 [Propithecus coquereli] 2.43e-106	-
TRINITY_DN6383_c0_g1	-0.444455	-0.0309137	1.49888	-1.23514	-0.681942	-0.836655	1.47165	0.781618	-0.523041	1	-	-	K12597-ko03018 RNA degradation	-	sp|Q12476|AIR2_YEAST Protein AIR2 OS=Saccharomyces cerevisiae (strain ATCC 204508 / S288c) GN=AIR2 PE=1 SV=1 1.41e-14	-	GBO09225.1 Zinc finger CCHC domain-containing protein 7, partial [Araneus ventricosus] 4.78e-06	-
TRINITY_DN6400_c0_g1	1.92642	1.49311	0.494748	-0.157696	-0.971227	-0.755357	-0.377293	-0.971227	-0.681474	1	-	-	-	-	-	-	-	-
TRINITY_DN6413_c0_g1	1.11788	1.40073	2.10749	-0.884074	-0.866074	-0.998798	-0.397013	-0.589207	-0.890935	1	-	-	-	-	-	-	-	-
TRINITY_DN6422_c0_g1	0.323596	0.510202	1.37325	-1.05779	-0.899364	-1.02276	1.19002	0.0300201	-0.447175	1	-	-	-	-	-	-	-	-
TRINITY_DN6469_c0_g1	2.07315	0.986578	0.74078	-0.0823855	-0.894319	-0.297557	-0.737608	-0.894319	-0.894319	1	-	-	-	-	-	-	-	-
TRINITY_DN6505_c0_g1	-0.777303	0.194678	1.62646	-1.23452	-0.95351	-0.697385	1.80549	0.482999	-0.446904	1	-	pfam09329, zf-primase, Primase zinc finger. This zinc finger is found in yeast Mcm10 proteins and DnaG-type primases. 3.63e-12	-	KOG3056, KOG3056, KOG3056, Protein required for S-phase initiation or completion [Cell cycle control, cell division, chromosome partitioning]. 4.17e-25	sp|O42709|MCM10_SCHPO DNA replication licensing factor mcm10 OS=Schizosaccharomyces pombe (strain 972 / ATCC 24843) GN=mcm10 PE=1 SV=1 1.19e-46	GO:0000228, nuclear chromosome;GO:0000724, double-strand break repair via homologous recombination;GO:0000725, recombinational repair;GO:0000727, double-strand break repair via break-induced replication;GO:0000785, chromatin;GO:0000790, nuclear chromatin;GO:0001932, regulation of protein phosphorylation;GO:0001934, positive regulation of protein phosphorylation;GO:0003674, molecular_function;GO:0…	XP_046442263.1 protein MCM10 homolog [Daphnia pulex] 2.33e-18	-
TRINITY_DN6586_c0_g1	0.389916	0.567008	1.85458	-1.37144	-1.01981	-0.983384	1.30981	0.206364	-0.95304	1	-	-	-	-	-	-	-	-
TRINITY_DN6609_c0_g1	0.531109	0.706957	1.05572	-1.00324	-0.795446	-1.06629	0.459283	-0.0675008	0.179406	1	-	-	K03031-ko03050 Proteasome	KOG3151, KOG3151, KOG3151, 26S proteasome regulatory complex, subunit RPN12/PSMD8 [Posttranslational modification, protein turnover, chaperones]. 1.19e-27	sp|P32496|RPN12_YEAST 26S proteasome regulatory subunit RPN12 OS=Saccharomyces cerevisiae (strain ATCC 204508 / S288c) GN=RPN12 PE=1 SV=3 1.32e-28	GO:0000075, cell cycle checkpoint;GO:0000076, DNA replication checkpoint;GO:0000228, nuclear chromosome;GO:0000278, mitotic cell cycle;GO:0000502, proteasome complex;GO:0000724, double-strand break repair via homologous recombination;GO:0000725, recombinational repair;GO:0000727, double-strand break repair via break-induced replication;GO:0000733, DNA strand renaturation;GO:0000785, chromatin;GO:…	XP_051253579.1 26S proteasome non-ATPase regulatory subunit 8 [Dicentrarchus labrax] 2.00e-37	-
TRINITY_DN6702_c0_g1	1.46037	1.0671	0.882926	-0.0659917	-0.482025	-0.754389	-0.627958	-0.820195	-0.659837	1	-	-	-	-	-	-	UJR07391.1 hypothetical protein I4U23_011677 [Adineta vaga] 8.63e-22	-
TRINITY_DN6864_c0_g1	1.17749	1.61578	0.980989	0.0766755	-1.1228	-0.971892	0.0982302	-0.920856	-0.933613	1	-	pfam07632, DUF1593, Protein of unknown function (DUF1593). A family of proteins in Rhodopirellula baltica that are predicted to be secreted. Also, a member has been identified in Caulobacter crescentus. These proteins mat be related to pfam01156. 3.29e-102	-	-	-	-	-	-
TRINITY_DN6882_c0_g1	-0.0799605	0.275005	1.25892	-0.92363	-1.35588	-1.06153	2.11855	0.626105	-0.857587	1	cd05356, 17beta-HSD1_like_SDR_c, 17-beta-hydroxysteroid dehydrogenases (17beta-HSDs) types -1, -3, and -12, -like, classical (c) SDRs. This subgroup includes various 17-beta-hydroxysteroid dehydrogenases and 3-ketoacyl-CoA reductase, these are members of the SDR family, and contain the canonical active site tetrad and glycine-rich NAD-binding motif of the classical SDRs. 3-ketoacyl-CoA reductase …	pfam00106, adh_short, short chain dehydrogenase. This family contains a wide variety of dehydrogenases. 1.05e-22	K10251-ko00062 Fatty acid elongation;ko00140 Steroid hormone biosynthesis;ko01040 Biosynthesis of unsaturated fatty acids;ko01212 Fatty acid metabolism	KOG1014, KOG1014, KOG1014, 17 beta-hydroxysteroid dehydrogenase type 3, HSD17B3 [Lipid transport and metabolism]. 4.90e-71	sp|A4QTE3|MKAR_MAGO7 Very-long-chain 3-oxoacyl-CoA reductase OS=Magnaporthe oryzae (strain 70-15 / ATCC MYA-4617 / FGSC 8958) GN=MGG_05096 PE=3 SV=1 2.03e-143	GO:0000038, very long-chain fatty acid metabolic process;GO:0003674, molecular_function;GO:0003824, catalytic activity;GO:0005575, cellular_component;GO:0005622, intracellular;GO:0005623, cell;GO:0005737, cytoplasm;GO:0005783, endoplasmic reticulum;GO:0005789, endoplasmic reticulum membrane;GO:0006082, organic acid metabolic process;GO:0006629, lipid metabolic process;GO:0006631, fatty acid metab…	KAJ3018680.1 hypothetical protein HDU68_011023 [Siphonaria sp. JEL0065] 4.32e-65	-
TRINITY_DN6930_c0_g1	1.94786	1.38676	0.175651	-0.398585	-0.974021	-0.321188	-0.569242	-0.197707	-1.04953	1	-	-	-	-	-	-	-	-
TRINITY_DN6945_c0_g1	0.219762	0.57245	1.15467	-0.840157	-0.952817	-1.0324	1.39138	0.289534	-0.80242	1	-	pfam10394, Hat1_N, Histone acetyl transferase HAT1 N-terminus. This domain is the N-terminal half of the structure of histone acetyl transferase HAT1. It is often found in association with the C-terminal part of the GNAT Acetyltransf_1 (pfam00583) domain. It seems to be motifs C and D of the structure. Histone acetyltransferases (HATs) catalyze the transfer of an acetyl group from acetyl-CoA to t…	-	KOG2696, KOG2696, KOG2696, Histone acetyltransferase type b catalytic subunit [Chromatin structure and dynamics]. 6.19e-44	sp|Q4I6A4|HAT1_GIBZE Histone acetyltransferase type B catalytic subunit OS=Gibberella zeae (strain PH-1 / ATCC MYA-4620 / FGSC 9075 / NRRL 31084) GN=HAT1 PE=3 SV=2 1.98e-131	GO:0000123, histone acetyltransferase complex;GO:0000228, nuclear chromosome;GO:0000302, response to reactive oxygen species;GO:0000785, chromatin;GO:0000790, nuclear chromatin;GO:0001558, regulation of cell growth;GO:0003674, molecular_function;GO:0003682, chromatin binding;GO:0003824, catalytic activity;GO:0004402, histone acetyltransferase activity;GO:0005488, binding;GO:0005515, protein bindi…	AQT27120.1 putative pyrroline-5-carboxylate reductase [Nilaparvata lugens] 4.04e-108	-
TRINITY_DN6972_c0_g1	-0.200941	0.320414	1.705	-0.848695	-0.945315	-1.545	1.37335	0.442336	-0.301153	1	cd19873, DSRM_MRPL3_like, double-stranded RNA binding motif of Saccharomyces cerevisiae mitochondrial 54S ribosomal protein L3 (MRPL3) and similar proteins. MRPL3 (also called mitochondrial large ribosomal subunit protein mL44) is a component of the mitochondrial ribosome (mitoribosome), a dedicated translation machinery responsible for the synthesis of mitochondrial genome-encoded proteins, incl…	-	-	KOG3769, KOG3769, KOG3769, Ribonuclease III domain proteins [Translation, ribosomal structure and biogenesis]. 9.14e-07	sp|P36516|RM03_YEAST 54S ribosomal protein L3, mitochondrial OS=Saccharomyces cerevisiae (strain ATCC 204508 / S288c) GN=MRPL3 PE=1 SV=2 7.71e-39	GO:0000313, organellar ribosome;GO:0000315, organellar large ribosomal subunit;GO:0003674, molecular_function;GO:0003676, nucleic acid binding;GO:0003723, RNA binding;GO:0003725, double-stranded RNA binding;GO:0003735, structural constituent of ribosome;GO:0003824, catalytic activity;GO:0004518, nuclease activity;GO:0004519, endonuclease activity;GO:0004521, endoribonuclease activity;GO:0004525, …	KAJ3020270.1 hypothetical protein HDU68_010256 [Siphonaria sp. JEL0065] 4.29e-16	-
TRINITY_DN6985_c0_g1	1.06657	0.956425	0.98824	-0.330867	-0.58721	-0.292861	-0.678972	-0.550821	-0.570501	1	cd02112, eukary_NR_Moco, molybdopterin binding domain of eukaryotic nitrate reductase (NR). Assimilatory NRs catalyze the reduction of nitrate to nitrite which is subsequently converted to NH4+ by nitrite reductase. Eukaryotic assimilatory nitrate reductases are cytosolic homodimeric enzymes with three prosthetic groups, flavin adenine dinucleotide (FAD), cytochrome b557, and Mo cofactor, which a…	pfam03404, Mo-co_dimer, Mo-co oxidoreductase dimerization domain. This domain is found in molybdopterin cofactor (Mo-co) oxidoreductases. It is involved in dimer formation, and has an Ig-fold structure. 3.64e-57	K10534-ko00910 Nitrogen metabolism	KOG0535, KOG0535, KOG0535, Sulfite oxidase, molybdopterin-binding component [Energy production and conversion]. 1.82e-76	sp|P43100|NIA_BEABA Nitrate reductase [NADPH] OS=Beauveria bassiana GN=NIA PE=3 SV=1 0.0	GO:0003674, molecular_function;GO:0003824, catalytic activity;GO:0006807, nitrogen compound metabolic process;GO:0008150, biological_process;GO:0008152, metabolic process;GO:0008940, nitrate reductase activity;GO:0016491, oxidoreductase activity;GO:0016661, oxidoreductase activity, acting on other nitrogenous compounds as donors;GO:0046857, oxidoreductase activity, acting on other nitrogenous com…	CAF1013340.1 unnamed protein product [Adineta steineri] >CAF3850773.1 unnamed protein product [Adineta steineri] 2.13e-289	-
TRINITY_DN7033_c0_g1	1.13114	1.92181	1.2134	-0.0968189	-0.712417	-1.43887	-0.783166	-0.986009	-0.249061	1	-	-	-	-	-	-	-	-
TRINITY_DN7042_c0_g1	1.41646	0.634187	0.584261	-0.585617	-0.974274	-1.59669	0.770507	0.0380589	-0.286892	1	cd00051, EFh, EF-hand, calcium binding motif; A diverse superfamily of calcium sensors and calcium signal modulators; most examples in this alignment model have 2 active canonical EF hands. Ca2+ binding induces a conformational change in the EF-hand motif, leading to the activation or inactivation of target proteins. EF-hands tend to occur in pairs or higher copy numbers. 9.39e-08	-	-	KOG0028, KOG0028, KOG0028, Ca2+-binding protein (centrin/caltractin), EF-Hand superfamily protein [Cytoskeleton, Cell cycle control, cell division, chromosome partitioning]. 9.33e-15	sp|O15182|CETN3_HUMAN Centrin-3 OS=Homo sapiens GN=CETN3 PE=1 SV=2 2.20e-22	GO:0000226, microtubule cytoskeleton organization;GO:0000278, mitotic cell cycle;GO:0003674, molecular_function;GO:0005198, structural molecule activity;GO:0005200, structural constituent of cytoskeleton;GO:0005488, binding;GO:0005509, calcium ion binding;GO:0005515, protein binding;GO:0005575, cellular_component;GO:0005622, intracellular;GO:0005623, cell;GO:0005634, nucleus;GO:0005737, cytoplasm…	XP_040841965.1 centrin-3 [Ochotona curzoniae] 2.42e-21	-
TRINITY_DN7047_c0_g1	0.590178	0.652042	1.21608	-0.762343	-1.03909	-0.565746	0.792041	-0.0577326	-0.825429	1	-	-	-	-	-	-	-	-
TRINITY_DN7062_c0_g1	1.35414	1.34005	0.719188	-0.557313	-0.456844	-0.70524	-0.283502	-0.70524	-0.70524	1	-	pfam02129, Peptidase_S15, X-Pro dipeptidyl-peptidase (S15 family). 1.94e-27	-	-	sp|Q9L9D7|COCE_RHOSM Cocaine esterase OS=Rhodococcus sp. (strain MB1 Bresler) GN=cocE PE=1 SV=1 1.05e-13	-	CAF4023904.1 unnamed protein product [Adineta steineri] 4.96e-116	-
TRINITY_DN7093_c0_g1	1.1103	0.623925	1.38881	-0.116303	-0.742162	-0.492648	-0.428507	-0.601257	-0.742162	1	-	-	-	-	-	-	-	-
TRINITY_DN7118_c0_g1	2.12673	1.6418	0.325591	-0.74576	-0.74576	-0.36532	-0.74576	-0.74576	-0.74576	1	cd00448, YjgF_YER057c_UK114_family, YjgF, YER057c, and UK114 belong to a large family of proteins present in bacteria, archaea, and eukaryotes with no definitive function. The conserved domain is similar in structure to chorismate mutase but there is no sequence similarity and no functional connection. Members of this family have been implicated in isoleucine (Yeo7, Ibm1, aldR) and purine (YjgF) …	pfam01042, Ribonuc_L-PSP, Endoribonuclease L-PSP. Endoribonuclease active on single-stranded mRNA. Inhibits protein synthesis by cleavage of mRNA. Previously thought to inhibit protein synthesis initiation. This protein may also be involved in the regulation of purine biosynthesis. YjgF (renamed RidA) family members are enamine/imine deaminases. They hydrolyze reactive intermediates released by P…	-	KOG2317, KOG2317, KOG2317, Putative translation initiation inhibitor UK114/IBM1 [Translation, ribosomal structure and biogenesis]. 7.42e-20	sp|Q9UR06|MMF2_SCHPO Protein mmf2, mitochondrial OS=Schizosaccharomyces pombe (strain 972 / ATCC 24843) GN=mmf2 PE=3 SV=1 7.16e-27	-	KAI4453325.1 2-iminobutanoate/2-iminopropanoate deaminase rida [Holotrichia oblita] 4.89e-19	-
TRINITY_DN7172_c0_g1	0.158201	0.434539	1.37756	-0.815742	-0.994388	-1.2691	1.2121	0.239892	-0.343059	1	-	-	-	KOG1733, KOG1733, KOG1733, Mitochondrial import inner membrane translocase, subunit TIM13 [Intracellular trafficking, secretion, and vesicular transport]. 1.88e-17	sp|Q4I6B0|TIM13_GIBZE Mitochondrial import inner membrane translocase subunit TIM13 OS=Gibberella zeae (strain PH-1 / ATCC MYA-4620 / FGSC 9075 / NRRL 31084) GN=TIM13 PE=3 SV=1 1.44e-18	GO:0000375, RNA splicing, via transesterification reactions;GO:0000377, RNA splicing, via transesterification reactions with bulged adenosine as nucleophile;GO:0000398, mRNA splicing, via spliceosome;GO:0003674, molecular_function;GO:0003676, nucleic acid binding;GO:0003723, RNA binding;GO:0003729, mRNA binding;GO:0005488, binding;GO:0005575, cellular_component;GO:0006139, nucleobase-containing c…	XP_037786720.1 mitochondrial import inner membrane translocase subunit Tim13-like [Penaeus monodon] 7.34e-13	-
TRINITY_DN7201_c0_g1	-0.433785	0.880695	2.5028	-0.662975	-1.46585	-1.01519	0.436068	-0.137111	-0.104652	1	-	-	-	-	-	-	-	-
TRINITY_DN7218_c0_g1	0.147327	1.0285	2.31696	-0.688815	-1.90705	-1.69944	1.52995	-0.424131	-0.303301	1	-	-	-	-	-	-	-	-
TRINITY_DN7223_c0_g1	1.9428	1.28695	0.628673	-0.425602	-0.869042	-0.763567	0.140607	-0.825692	-1.11513	1	-	pfam06985, HET, Heterokaryon incompatibility protein (HET). This family represents a conserved region approximately 150 residues long within various heterokaryon incompatibility proteins that seem to be restricted to ascomycete fungi. Genetic differences in specific het genes prevent a viable heterokaryotic fungal cell from being formed by the fusion of filaments from two different wild-type stra…	-	-	-	-	KAI1693513.1 heterokaryon incompatibility protein (HET) domain-containing protein [Ditylenchus destructor] 6.49e-27	-
TRINITY_DN7232_c0_g1	0.78545	1.19092	1.59672	-1.18624	-0.738707	-1.54457	1.47375	-0.0920936	-1.48523	1	cd01562, Thr-dehyd, Threonine dehydratase: The first step in amino acid degradation is the removal of nitrogen. Although the nitrogen atoms of most amino acids are transferred to alpha-ketoglutarate before removal, the alpha-amino group of threonine can be directly converted into NH4+. The direct deamination is catalyzed by threonine dehydratase, in which pyridoxal phosphate (PLP) is the prosthet…	pfam00291, PALP, Pyridoxal-phosphate dependent enzyme. Members of this family are all pyridoxal-phosphate dependent enzymes. This family includes: serine dehydratase EC:4.2.1.13 P20132, threonine dehydratase EC:4.2.1.16, tryptophan synthase beta chain EC:4.2.1.20, threonine synthase EC:4.2.99.2, cysteine synthase EC:4.2.99.8 P11096, cystathionine beta-synthase EC:4.2.1.22, 1-aminocyclopropane-1-c…	K01754-ko00260 Glycine, serine and threonine metabolism;ko01230 Biosynthesis of amino acids;ko00290 Valine, leucine and isoleucine biosynthesis;ko01200 Carbon metabolism	KOG1250, KOG1250, KOG1250, Threonine/serine dehydratases [Amino acid transport and metabolism]. 1.61e-75	sp|O42615|THDH_BLAAD Threonine dehydratase, mitochondrial OS=Blastobotrys adeninivorans GN=ILV1 PE=3 SV=1 0.0	GO:0003674, molecular_function;GO:0003824, catalytic activity;GO:0004794, L-threonine ammonia-lyase activity;GO:0005575, cellular_component;GO:0005622, intracellular;GO:0005623, cell;GO:0005737, cytoplasm;GO:0005739, mitochondrion;GO:0006082, organic acid metabolic process;GO:0006520, cellular amino acid metabolic process;GO:0006549, isoleucine metabolic process;GO:0006566, threonine metabolic pr…	AQT27276.1 putative threonine ammonia-lyase, partial [Nilaparvata lugens] 6.94e-191	-
TRINITY_DN7244_c0_g1	-0.0420078	1.3325	2.1295	-1.6862	-2.44467	-1.91334	1.06131	0.80939	0.75351	1	cd00413, Glyco_hydrolase_16, glycosyl hydrolase family 16. The O-Glycosyl hydrolases are a widespread group of enzymes that hydrolyse the glycosidic bond between two or more carbohydrates, or between a carbohydrate and a non-carbohydrate moiety. A glycosyl hydrolase classification system based on sequence similarity has led to the definition of more than 95 different families inlcuding glycosyl h…	pfam00722, Glyco_hydro_16, Glycosyl hydrolases family 16. 4.19e-07	-	-	-	-	-	-
TRINITY_DN7273_c0_g1	0.140348	0.369988	1.18584	-0.634371	-0.36496	-0.571134	0.781473	-0.152287	-0.754902	1	-	-	-	-	sp|Q2LRP7|TOLB_SYNAS Protein TolB OS=Syntrophus aciditrophicus (strain SB) GN=tolB PE=3 SV=2 1.65e-07	-	-	-
TRINITY_DN7296_c0_g1	0.878948	0.501223	0.8971	-0.162323	-0.790653	-0.785267	0.279604	-0.417604	-0.401028	1	-	-	-	-	-	-	-	-
TRINITY_DN73_c0_g1	0.0304196	0.281474	1.75773	-1.11289	-0.7659	-1.39818	1.63484	0.0860719	-0.513568	1	cd18086, HsC9orf114-like, SPOUT superfamily RNA methyltransferase HsC9orf114-like. Human C9orf114 (also known as centromere protein 32 or CENP-32) is required for association of the centrosomes with the poles of the bipolar mitotic spindle during metaphase. CENP-32 is a member of the SPOUT (SpoU-TrmD) methyltransferase (MTase) superfamily, a large class of S-adenosyl-L-methionine (AdoMet or SAM)-…	pfam02598, Methyltrn_RNA_3, Putative RNA methyltransferase. This family has a TIM barrel-like fold with a deep C-terminal trefoil knot. The arrangement of its hydrophilic and hydrophobic surfaces are opposite to that of the classic TIM barrel proteins. It is likely to bind RNA, and may function as a methyltransferase. 8.48e-76	-	KOG3925, KOG3925, KOG3925, Uncharacterized conserved protein [Function unknown]. 8.23e-54	sp|Q5T280|CI114_HUMAN Putative methyltransferase C9orf114 OS=Homo sapiens GN=C9orf114 PE=1 SV=3 6.81e-65	-	XP_028394946.1 putative methyltransferase C9orf114 homolog [Dendronephthya gigantea] 3.84e-66	-
TRINITY_DN7302_c0_g1	1.18213	1.47219	1.60332	-0.790856	-0.899021	-0.884593	-0.273993	-0.58782	-0.821346	1	cd12244, RRM2_MSSP, RNA recognition motif 2 (RRM2) found in the c-myc gene single-strand binding proteins (MSSP) family. This subfamily corresponds to the RRM2 of c-myc gene single-strand binding proteins (MSSP) family, including single-stranded DNA-binding protein MSSP-1 (also termed RBMS1 or SCR2) and MSSP-2 (also termed RBMS2 or SCR3). All MSSP family members contain two RNA recognition motifs…	pfam00076, RRM_1, RNA recognition motif. (a.k.a. RRM, RBD, or RNP domain). The RRM motif is probably diagnostic of an RNA binding protein. RRMs are found in a variety of RNA binding proteins, including various hnRNP proteins, proteins implicated in regulation of alternative splicing, and protein components of snRNPs. The motif also appears in a few single stranded DNA binding proteins. The RRM st…	-	KOG0145, KOG0145, KOG0145, RNA-binding protein ELAV/HU (RRM superfamily) [RNA processing and modification]. 1.93e-10	sp|Q2L4W6|SPO5_SCHPO Sporulation-specific protein 5 OS=Schizosaccharomyces pombe (strain 972 / ATCC 24843) GN=spo5 PE=1 SV=1 4.65e-24	GO:0000003, reproduction;GO:0000226, microtubule cytoskeleton organization;GO:0000280, nuclear division;GO:0003006, developmental process involved in reproduction;GO:0003674, molecular_function;GO:0003676, nucleic acid binding;GO:0003723, RNA binding;GO:0005488, binding;GO:0005575, cellular_component;GO:0005622, intracellular;GO:0005623, cell;GO:0005634, nucleus;GO:0005737, cytoplasm;GO:0006996, …	KAJ3027463.1 hypothetical protein HDU68_003760 [Siphonaria sp. JEL0065] 8.70e-16	-
TRINITY_DN7305_c0_g1	2.16749	1.9733	0.234466	-0.407722	-0.805174	-0.919935	-0.687003	-0.771464	-0.783957	1	-	-	-	-	-	-	-	-
TRINITY_DN7328_c0_g1	-0.347989	-0.323512	1.72409	-1.52692	-0.645677	-0.98745	1.98554	0.866693	-0.744777	1	-	-	-	-	-	-	-	-
TRINITY_DN7340_c0_g1	0.951663	0.740388	0.706128	-1.03699	-1.89155	-1.07277	0.52134	0.320797	0.760987	1	-	pfam11905, DUF3425, Domain of unknown function (DUF3425). This presumed domain is functionally uncharacterized. This domain is found in eukaryotes. This domain is typically between 120 to 143 amino acids in length. 1.01e-06	-	-	-	-	-	-
TRINITY_DN7368_c0_g1	0.038775	0.252104	1.75074	-1.29587	-1.15777	-1.10539	2.13832	0.787991	-1.4089	1	-	-	-	-	-	-	-	-
TRINITY_DN7377_c0_g1	1.40251	1.44156	1.35081	-1.20248	-0.8016	-1.60938	0.507414	-0.277447	-0.811372	1	-	-	-	-	sp|P47159|YJ94_YEAST Uncharacterized membrane protein YJR124C OS=Saccharomyces cerevisiae (strain ATCC 204508 / S288c) GN=YJR124C PE=1 SV=1 3.10e-59	-	KAJ3018815.1 hypothetical protein HDU68_010979 [Siphonaria sp. JEL0065] 4.62e-56	-
TRINITY_DN7384_c0_g1	0.0702898	0.452758	1.97218	-1.24331	-0.932636	-0.707342	1.03895	0.100717	-0.751607	1	cd00653, RNA_pol_B_RPB2, RNA polymerase beta subunit. RNA polymerases catalyse the DNA dependent polymerization of RNA. Prokaryotes contain a single RNA polymerase compared to three in eukaryotes (not including mitochondrial. and chloroplast polymerases). Each RNA polymerase complex contains two related members of this family, in each case they are the two largest subunits.The clamp is a mobile s…	pfam00562, RNA_pol_Rpb2_6, RNA polymerase Rpb2, domain 6. RNA polymerases catalyze the DNA dependent polymerization of RNA. Prokaryotes contain a single RNA polymerase compared to three in eukaryotes (not including mitochondrial. and chloroplast polymerases). This domain represents the hybrid binding domain and the wall domain. The hybrid binding domain binds the nascent RNA strand / template DNA…	K03021-ko00240 Pyrimidine metabolism;ko03020 RNA polymerase;ko00230 Purine metabolism;ko04623 Cytosolic DNA-sensing pathway	KOG0215, KOG0215, KOG0215, RNA polymerase III, second largest subunit [Transcription]. 0.0	sp|P22276|RPC2_YEAST DNA-directed RNA polymerase III subunit RPC2 OS=Saccharomyces cerevisiae (strain ATCC 204508 / S288c) GN=RET1 PE=1 SV=2 0.0	GO:0000428, DNA-directed RNA polymerase complex;GO:0003674, molecular_function;GO:0003824, catalytic activity;GO:0003899, DNA-directed 5'-3' RNA polymerase activity;GO:0005575, cellular_component;GO:0005622, intracellular;GO:0005623, cell;GO:0005634, nucleus;GO:0005654, nucleoplasm;GO:0005666, DNA-directed RNA polymerase III complex;GO:0006139, nucleobase-containing compound metabolic process;GO:…	CAH1244351.1 POLR3B [Branchiostoma lanceolatum] 0.0	PREDICTED: Strongylocentrotus purpuratus DNA-directed RNA polymerase III subunit RPC2 (LOC577662), mRNA 7.07e-24
TRINITY_DN7402_c0_g1	0.928788	0.877497	1.19191	-1.34514	-1.9549	-1.75958	1.21221	0.629344	0.219871	1	cd11062, CYP58-like, cytochrome P450 family 58-like fungal cytochrome P450s. This group includes Fusarium sporotrichioides cytochrome P450 58 (CYP58, also known as Tri4 and trichodiene oxygenase), and similar fungal proteins. CYP58 catalyzes the oxygenation of trichodiene during the biosynthesis of trichothecenes, which are sesquiterpenoid toxins that act by inhibiting protein biosynthesis. The C…	pfam00067, p450, Cytochrome P450. Cytochrome P450s are haem-thiolate proteins involved in the oxidative degradation of various compounds. They are particularly well known for their role in the degradation of environmental toxins and mutagens. They can be divided into 4 classes, according to the method by which electrons from NAD(P)H are delivered to the catalytic site. Sequence conservation is re…	-	KOG0684, KOG0684, KOG0684, Cytochrome P450 [Secondary metabolites biosynthesis, transport and catabolism]. 2.39e-11	sp|Q12612|TRI4_FUSSP Trichodiene oxygenase OS=Fusarium sporotrichioides GN=TRI4 PE=3 SV=1 1.03e-75	-	XP_022791671.1 cytochrome P450 3A30-like [Stylophora pistillata] 2.52e-21	-
TRINITY_DN7437_c0_g1	0.0886177	0.205319	1.64898	-0.736183	-1.01412	-0.91662	1.31421	0.129721	-0.719917	1	-	pfam05630, NPP1, Necrosis inducing protein (NPP1). This family consists of several NPP1 like necrosis inducing proteins from oomycetes, fungi and bacteria. Infiltration of NPP1 into leaves of Arabidopsis thaliana plants result in transcript accumulation of pathogenesis-related (PR) genes, production of ROS and ethylene, callose apposition, and HR-like cell death. 3.63e-45	-	-	-	-	-	-
TRINITY_DN746_c0_g1	0.204099	0.347022	1.67858	-0.940548	-0.965901	-0.976395	1.46351	0.0524355	-0.86281	1	cd02801, DUS_like_FMN, Dihydrouridine synthase-like (DUS-like) FMN-binding domain. Members of this family catalyze the reduction of the 5,6-double bond of a uridine residue on tRNA. Dihydrouridine modification of tRNA is widely observed in prokaryotes and eukaryotes, and also in some archaea. Most dihydrouridines are found in the D loop of t-RNAs. The role of dihydrouridine in tRNA is currently u…	pfam01207, Dus, Dihydrouridine synthase (Dus). Members of this family catalyze the reduction of the 5,6-double bond of a uridine residue on tRNA. Dihydrouridine modification of tRNA is widely observed in prokaryotes and eukaryotes, and also in some archae. Most dihydrouridines are found in the D loop of t-RNAs. The role of dihydrouridine in tRNA is currently unknown, but may increase conformation…	-	KOG2335, KOG2335, KOG2335, tRNA-dihydrouridine synthase [Translation, ribosomal structure and biogenesis]. 4.68e-43	sp|O95620|DUS4L_HUMAN tRNA-dihydrouridine(20a/20b) synthase [NAD(P)+]-like OS=Homo sapiens GN=DUS4L PE=2 SV=2 2.63e-54	GO:0002943, tRNA dihydrouridine synthesis;GO:0003674, molecular_function;GO:0003824, catalytic activity;GO:0006139, nucleobase-containing compound metabolic process;GO:0006396, RNA processing;GO:0006399, tRNA metabolic process;GO:0006400, tRNA modification;GO:0006725, cellular aromatic compound metabolic process;GO:0006807, nitrogen compound metabolic process;GO:0008033, tRNA processing;GO:000815…	NXA51355.1 DUS4L synthase [Nothocercus julius] 3.71e-52	-
TRINITY_DN7480_c0_g1	0.219401	1.21416	1.70401	-0.459119	-1.14914	-0.976832	0.254311	-0.158711	-0.648082	1	cd20071, SET_SMYD, SET domain (including SET domain and post-SET domain) found in SET and MYND domain-containing protein, and similar proteins. The family includes SET and MYND domain-containing proteins, SMYD1-SYMD5. SMYD1 (EC 2.1.1.43; also termed BOP) is a heart and muscle specific SET-MYND domain containing protein, which functions as a histone methyltransferase and regulates downstream gene …	-	-	-	sp|O74467|SET5_SCHPO SET domain-containing protein 5 OS=Schizosaccharomyces pombe (strain 972 / ATCC 24843) GN=set5 PE=1 SV=1 1.10e-12	-	TRY70054.1 hypothetical protein TCAL_04842 [Tigriopus californicus] 4.03e-12	-
TRINITY_DN7604_c0_g1	0.96523	0.677701	1.10291	-1.29543	-0.351921	-0.715325	0.874674	-0.282531	-0.975306	1	-	-	-	-	-	-	-	-
TRINITY_DN762_c0_g1	0.337671	0.453841	1.36545	-0.992857	-1.05393	-0.855036	1.14396	0.27156	-0.670669	1	-	pfam01922, SRP19, SRP19 protein. The signal recognition particle (SRP) binds to the signal peptide of proteins as they are being translated. The binding of the SRP halts translation and the complex is then transported to the endoplasmic reticulum's cytoplasmic surface. The SRP then aids translocation of the protein through the ER membrane. The SRP is a ribonucleoprotein that is composed of a smal…	K03105-ko03060 Protein export	KOG3198, KOG3198, KOG3198, Signal recognition particle, subunit Srp19 [Intracellular trafficking, secretion, and vesicular transport]. 4.48e-19	sp|P41922|SEC65_YARLI Signal recognition particle SEC65 subunit OS=Yarrowia lipolytica (strain CLIB 122 / E 150) GN=SEC65 PE=3 SV=1 3.40e-36	GO:0003674, molecular_function;GO:0003676, nucleic acid binding;GO:0003723, RNA binding;GO:0005488, binding;GO:0005575, cellular_component;GO:0005622, intracellular;GO:0005623, cell;GO:0005737, cytoplasm;GO:0005786, signal recognition particle, endoplasmic reticulum targeting;GO:0006605, protein targeting;GO:0006612, protein targeting to membrane;GO:0006613, cotranslational protein targeting to m…	XP_009560301.1 PREDICTED: signal recognition particle 19 kDa protein [Cuculus canorus] 4.16e-12	-
TRINITY_DN7649_c0_g1	0.832881	0.217269	1.00519	-0.870149	-1.12368	-1.53533	1.41382	0.379869	-0.319873	1	cd10958, CE4_NodB_like_2, Catalytic NodB homology domain of uncharacterized chitin deacetylases and hypothetical proteins. This family includes some uncharacterized chitin deacetylases and hypothetical proteins, mainly from eukaryotes. Although their biological function is unknown, members in this family show high sequence homology to the catalytic NodB homology domain of Colletotrichum lindemuth…	pfam01053, Cys_Met_Meta_PP, Cys/Met metabolism PLP-dependent enzyme. This family includes enzymes involved in cysteine and methionine metabolism. The following are members: Cystathionine gamma-lyase, Cystathionine gamma-synthase, Cystathionine beta-lyase, Methionine gamma-lyase, OAH/OAS sulfhydrylase, O-succinylhomoserine sulfhydrylase All of these members participate is slightly different reacti…	-	KOG0053, KOG0053, KOG0053, Cystathionine beta-lyases/cystathionine gamma-synthases [Amino acid transport and metabolism]. 3.20e-36	sp|P38716|YHR2_YEAST Uncharacterized trans-sulfuration enzyme YHR112C OS=Saccharomyces cerevisiae (strain ATCC 204508 / S288c) GN=YHR112C PE=1 SV=1 4.21e-99	GO:0000096, sulfur amino acid metabolic process;GO:0000097, sulfur amino acid biosynthetic process;GO:0003674, molecular_function;GO:0003824, catalytic activity;GO:0003962, cystathionine gamma-synthase activity;GO:0004121, cystathionine beta-lyase activity;GO:0004123, cystathionine gamma-lyase activity;GO:0005488, binding;GO:0005575, cellular_component;GO:0005622, intracellular;GO:0005623, cell;G…	CAF1209297.1 unnamed protein product [Rotaria sp. Silwood1] >CAF1585426.1 unnamed protein product [Rotaria sp. Silwood1] >CAF3706475.1 unnamed protein product [Rotaria sp. Silwood1] >CAF4857687.1 unnamed protein product [Rotaria sp. Silwood1] 1.41e-54	-
TRINITY_DN7657_c0_g1	0.489789	0.50153	1.48032	-1.03376	-0.642546	-1.0628	1.07027	-0.00807126	-0.794729	1	cd11385, RagC_like, Rag GTPase, subfamily of Ras-related GTPases, includes Ras-related GTP-binding proteins C and D. RagC and RagD are closely related Rag GTPases (ras-related GTP-binding protein C and D) that constitute a unique subgroup of the Ras superfamily, and are functional homologs of Saccharomyces cerevisiae Gtr2. These domains form heterodimers with RagA or RagB, and similarly, Gtr2 dim…	pfam04670, Gtr1_RagA, Gtr1/RagA G protein conserved region. GTR1 was first identified in S. cerevisiae as a suppressor of a mutation in RCC1. Biochemical analysis revealed that Gtr1 is in fact a G protein of the Ras family. The RagA/B proteins are the human homologs of Gtr1. Included in this family is the human Rag C, a novel protein that has been shown to interact with RagA/B. 4.77e-34	K16186-ko04150 mTOR signaling pathway	KOG3887, KOG3887, KOG3887, Predicted small GTPase involved in nuclear protein import [Intracellular trafficking, secretion, and vesicular transport]. 1.21e-104	sp|O74544|GTR2_SCHPO GTP-binding protein gtr2 OS=Schizosaccharomyces pombe (strain 972 / ATCC 24843) GN=gtr2 PE=3 SV=1 1.55e-101	GO:0000166, nucleotide binding;GO:0000228, nuclear chromosome;GO:0000322, storage vacuole;GO:0000323, lytic vacuole;GO:0000324, fungal-type vacuole;GO:0000329, fungal-type vacuole membrane;GO:0000785, chromatin;GO:0000790, nuclear chromatin;GO:0001101, response to acid chemical;GO:0001882, nucleoside binding;GO:0001883, purine nucleoside binding;GO:0003674, molecular_function;GO:0003824, catalyti…	XP_023241396.1 ras-related GTP-binding protein C-like [Centruroides sculpturatus] >XP_023241398.1 ras-related GTP-binding protein C-like [Centruroides sculpturatus] 2.77e-104	-
TRINITY_DN7691_c0_g1	1.83006	0.822556	2.17581	-1.01643	-1.47774	-1.36658	0.368738	-0.159455	-1.17695	1	-	pfam00561, Abhydrolase_1, alpha/beta hydrolase fold. This catalytic domain is found in a very wide range of enzymes. 9.08e-06	-	-	-	-	-	-
TRINITY_DN7692_c0_g1	0.397256	0.9053	1.19261	-0.775045	-1.25357	-1.07993	0.44881	-0.0192999	0.183859	1	-	pfam08643, DUF1776, Fungal family of unknown function (DUF1776). This is a fungal family of unknown function. One of the proteins in this family YSC83 has been localized to the mitochondria. 1.72e-66	-	KOG1040, KOG1040, KOG1040, Polyadenylation factor I complex, subunit, Yth1 (CPSF subunit) [RNA processing and modification]. 3.39e-33	sp|Q4IPA4|YTH1_GIBZE mRNA 3'-end-processing protein YTH1 OS=Gibberella zeae (strain PH-1 / ATCC MYA-4620 / FGSC 9075 / NRRL 31084) GN=YTH1 PE=3 SV=2 3.56e-86	GO:0003674, molecular_function;GO:0003824, catalytic activity;GO:0005575, cellular_component;GO:0005622, intracellular;GO:0005623, cell;GO:0005737, cytoplasm;GO:0005739, mitochondrion;GO:0043226, organelle;GO:0043227, membrane-bounded organelle;GO:0043229, intracellular organelle;GO:0043231, intracellular membrane-bounded organelle;GO:0044424, intracellular part;GO:0044444, cytoplasmic part;GO:00…	KAI0990699.1 hypothetical protein GJ496_009230 [Pomphorhynchus laevis] 1.16e-19	-
TRINITY_DN7702_c0_g2	1.14827	2.32942	0.333689	0.0663694	-1.62612	-0.889614	-0.684574	-0.419974	-0.257465	1	-	pfam00743, FMO-like, Flavin-binding monooxygenase-like. This family includes FMO proteins, cyclohexanone mono-oxygenase and a number of different mono-oxygenases. 1.37e-13	-	KOG1399, KOG1399, KOG1399, Flavin-containing monooxygenase [Secondary metabolites biosynthesis, transport and catabolism]. 1.44e-10	sp|Q9RKB5|BVMO2_STRCO Baeyer-Villiger monooxygenase OS=Streptomyces coelicolor (strain ATCC BAA-471 / A3(2) / M145) GN=SCO3172 PE=1 SV=1 2.61e-79	-	CAF4684158.1 unnamed protein product [Rotaria sp. Silwood1] 1.05e-92	-
TRINITY_DN7721_c0_g1	0.568517	0.715182	1.60087	-1.19043	-1.31491	-0.862736	0.699229	-0.0220094	-0.193711	1	-	-	-	-	-	-	CAF3905357.1 unnamed protein product [Rotaria sp. Silwood1] 2.18e-07	-
TRINITY_DN7731_c0_g1	1.02275	0.790595	1.60064	-0.856119	-0.652822	-0.766511	0.98994	-0.478659	-1.64981	1	-	-	-	-	-	-	-	-
TRINITY_DN7738_c0_g2	-0.00755305	0.416809	1.35015	-1.32496	-0.938538	-0.96853	1.88938	0.386275	-0.803035	1	cd00777, AspRS_core, Asp tRNA synthetase (aspRS) class II core domain. Class II assignment is based upon its structure and the presence of three characteristic sequence motifs. AspRS is a homodimer, which attaches a specific amino acid to the 3' OH group of ribose of the appropriate tRNA. The catalytic core domain is primarily responsible for the ATP-dependent formation of the enzyme bound aminoa…	pfam00152, tRNA-synt_2, tRNA synthetases class II (D, K and N). 4.12e-22	K01876-ko00970 Aminoacyl-tRNA biosynthesis	KOG2411, KOG2411, KOG2411, Aspartyl-tRNA synthetase, mitochondrial [Translation, ribosomal structure and biogenesis]. 2.25e-94	sp|P15179|SYDM_YEAST Aspartate--tRNA ligase, mitochondrial OS=Saccharomyces cerevisiae (strain ATCC 204508 / S288c) GN=MSD1 PE=1 SV=1 6.77e-96	GO:0000166, nucleotide binding;GO:0000959, mitochondrial RNA metabolic process;GO:0003674, molecular_function;GO:0003824, catalytic activity;GO:0004812, aminoacyl-tRNA ligase activity;GO:0004815, aspartate-tRNA ligase activity;GO:0005488, binding;GO:0005524, ATP binding;GO:0005575, cellular_component;GO:0005622, intracellular;GO:0005623, cell;GO:0005737, cytoplasm;GO:0005739, mitochondrion;GO:000…	XP_033122549.1 aspartate--tRNA ligase, mitochondrial-like isoform X1 [Anneissia japonica] 2.42e-94	-
TRINITY_DN7748_c0_g1	0.59003	0.891298	1.58553	-1.42909	-0.946669	-0.91595	0.771015	0.384241	-0.930406	1	-	-	-	-	-	-	-	-
TRINITY_DN7762_c0_g1	0.153613	1.63741	1.53407	-0.646639	-1.56375	-0.860156	0.868082	-0.343009	-0.779617	1	-	-	-	-	-	-	-	-
TRINITY_DN7782_c0_g2	0.476017	0.299807	0.343207	-0.487393	-0.382384	-0.487393	0.366277	0.192215	-0.320353	1	cd03281, ABC_MSH5_euk, ATP-binding cassette domain of eukaryotic MutS5 homolog. The MutS protein initiates DNA mismatch repair by recognizing mispaired and unpaired bases embedded in duplex DNA and activating endo- and exonucleases to remove the mismatch. Members of the MutS family possess C-terminal domain with a conserved ATPase activity that belongs to the ATP binding cassette (ABC) superfamil…	pfam00488, MutS_V, MutS domain V. This domain is found in proteins of the MutS family (DNA mismatch repair proteins) and is found associated with pfam01624, pfam05188, pfam05192 and pfam05190. The mutS family of proteins is named after the Salmonella typhimurium MutS protein involved in mismatch repair; other members of the family included the eukaryotic MSH 1,2,3, 4,5 and 6 proteins. These have …	-	KOG0221, KOG0221, KOG0221, Mismatch repair ATPase MSH5 (MutS family) [Replication, recombination and repair]. 4.48e-98	sp|O43196|MSH5_HUMAN MutS protein homolog 5 OS=Homo sapiens GN=MSH5 PE=1 SV=1 1.23e-85	GO:0000003, reproduction;GO:0000228, nuclear chromosome;GO:0000280, nuclear division;GO:0000793, condensed chromosome;GO:0000794, condensed nuclear chromosome;GO:0000795, synaptonemal complex;GO:0003674, molecular_function;GO:0003676, nucleic acid binding;GO:0003677, DNA binding;GO:0003690, double-stranded DNA binding;GO:0003824, catalytic activity;GO:0005488, binding;GO:0005575, cellular_compone…	XP_028412977.1 mutS protein homolog 5-like isoform X2 [Dendronephthya gigantea] 3.27e-111	-
TRINITY_DN7784_c0_g1	1.41956	1.21124	0.957357	-0.58656	-0.675905	-0.735258	-0.121402	-0.658605	-0.810425	1	-	pfam08450, SGL, SMP-30/Gluconolaconase/LRE-like region. This family describes a region that is found in proteins expressed by a variety of eukaryotic and prokaryotic species. These proteins include various enzymes, such as senescence marker protein 30 (SMP-30), gluconolactonase and luciferin-regenerating enzyme (LRE). SMP-30 is known to hydrolyze diisopropyl phosphorofluoridate in the liver, and …	-	KOG1520, KOG1520, KOG1520, Predicted alkaloid synthase/Surface mucin Hemomucin [General function prediction only]. 1.05e-06	sp|Q01578|GNL_ZYMMO Gluconolactonase OS=Zymomonas mobilis subsp. mobilis (strain ATCC 31821 / ZM4 / CP4) GN=gnl PE=1 SV=2 5.35e-07	-	CAF0914139.1 unnamed protein product [Adineta ricciae] >CAF0946521.1 unnamed protein product [Adineta ricciae] 4.49e-21	-
TRINITY_DN7792_c0_g1	0.212567	1.04899	1.24379	-0.708705	-1.23363	-1.03821	1.29607	0.396502	-1.21737	1	cd17647, A_NRPS_alphaAR, Alpha-aminoadipate reductase. This family contains L-2-aminoadipate reductase, also known as alpha-aminoadipate reductase (EC 1.2.1.95) or alpha-AR or L-aminoadipate-semialdehyde dehydrogenase (EC 1.2.1.31), which catalyzes the activation of alpha-aminoadipate by ATP-dependent adenylation and the reduction of activated alpha-aminoadipate by NADPH. The activated alpha-amin…	pfam07993, NAD_binding_4, Male sterility protein. This family represents the C-terminal region of the male sterility protein in a number of arabidopsis and drosophila. A sequence-related jojoba acyl CoA reductase is also included. 8.33e-39	K00143-ko00310 Lysine degradation;ko00300 Lysine biosynthesis;ko01230 Biosynthesis of amino acids	KOG1178, KOG1178, KOG1178, Non-ribosomal peptide synthetase/alpha-aminoadipate reductase and related enzymes [Secondary metabolites biosynthesis, transport and catabolism]. 4.03e-99	sp|O74298|LYS2_PENCH L-2-aminoadipate reductase large subunit OS=Penicillium chrysogenum GN=lys2 PE=3 SV=1 0.0	GO:0003674, molecular_function;GO:0003824, catalytic activity;GO:0004043, L-aminoadipate-semialdehyde dehydrogenase activity;GO:0005575, cellular_component;GO:0005622, intracellular;GO:0005623, cell;GO:0005737, cytoplasm;GO:0006082, organic acid metabolic process;GO:0006520, cellular amino acid metabolic process;GO:0006553, lysine metabolic process;GO:0006807, nitrogen compound metabolic process;…	XP_019919645.2 linear gramicidin synthase subunit D-like [Crassostrea gigas] >XP_019919646.2 linear gramicidin synthase subunit D-like [Crassostrea gigas] 7.17e-94	-
TRINITY_DN7825_c0_g1	1.3548	0.930279	1.45805	-0.0300048	-1.0604	-0.270415	-0.614128	-0.969514	-0.798676	1	cd11041, CYP503A1-like, cytochrome P450 family 503, subfamily A, polypeptide 1 and similar cytochrome P450s. This family is composed of predominantly fungal cytochrome P450s (CYPs) with similarity to Fusarium fujikuroi Cytochrome P450 503A1 (CYP503A1, also called ent-kaurene oxidase or cytochrome P450-4), Aspergillus nidulans austinol synthesis protein I (ausI), Alternaria alternata tentoxin synt…	pfam00067, p450, Cytochrome P450. Cytochrome P450s are haem-thiolate proteins involved in the oxidative degradation of various compounds. They are particularly well known for their role in the degradation of environmental toxins and mutagens. They can be divided into 4 classes, according to the method by which electrons from NAD(P)H are delivered to the catalytic site. Sequence conservation is re…	-	KOG0158, KOG0158, KOG0158, Cytochrome P450 CYP3/CYP5/CYP6/CYP9 subfamilies [Secondary metabolites biosynthesis, transport and catabolism]. 1.99e-22	sp|Q9C449|PAXP_PENPX Cytochrome P450 monooxygenase paxP OS=Penicillium paxilli GN=paxP PE=1 SV=1 1.22e-70	-	XP_014227659.1 probable cytochrome P450 49a1 [Trichogramma pretiosum] 1.55e-16	-
TRINITY_DN7848_c0_g1	0.827949	2.10975	1.16377	-0.0797623	-0.954728	-0.954728	-0.202787	-0.954728	-0.954728	1	-	-	-	-	-	-	-	-
TRINITY_DN7854_c0_g1	2.00333	1.66861	1.15462	-0.304605	-1.0073	-1.30044	-0.413168	-1.30044	-0.500606	1	-	-	-	-	-	-	-	-
TRINITY_DN7861_c0_g1	1.33661	1.26099	0.625894	-0.0594061	-0.956699	-0.535996	-0.566139	-0.534207	-0.571041	1	-	pfam08125, Mannitol_dh_C, Mannitol dehydrogenase C-terminal domain. 1.01e-58	K00045-ko00051 Fructose and mannose metabolism	-	sp|Q2U100|M2DH_ASPOR Mannitol 2-dehydrogenase OS=Aspergillus oryzae (strain ATCC 42149 / RIB 40) GN=AO090011000230 PE=3 SV=1 0.0	GO:0000166, nucleotide binding;GO:0003674, molecular_function;GO:0003824, catalytic activity;GO:0005488, binding;GO:0005575, cellular_component;GO:0005576, extracellular region;GO:0005975, carbohydrate metabolic process;GO:0006059, hexitol metabolic process;GO:0006066, alcohol metabolic process;GO:0008150, biological_process;GO:0008152, metabolic process;GO:0009987, cellular process;GO:0016491, o…	MCL4127413.1 hypothetical protein [Idotea baltica] 2.86e-141	-
TRINITY_DN7876_c0_g1	0.839455	0.320389	1.51621	-0.827451	-0.452852	-0.638684	0.535049	-0.120512	-1.17161	1	-	pfam14479, HeLo, Prion-inhibition and propagation. This N-terminal region, HeLo, has a prion-inhibitory effect in cis on its own prion-forming domain (PFD) and in trans on HET-s prion propagation. The domain is found exclusively in the fungal kingdom. Its structure, as it occurs in the HET-s/HET-S proteins, consists of two bundles of alpha-helices that pack into a single globular domain. The doma…	-	-	-	-	-	-
TRINITY_DN7879_c0_g1	0.245457	0.378939	1.26047	-0.957329	-1.09073	-0.858832	0.911448	0.826859	-0.716275	1	-	pfam10156, Med17, Subunit 17 of Mediator complex. This Mediator complex subunit was formerly known as Srb4 in yeasts or Trap80 in Drosophila and human. The Med17 subunit is located within the head domain and is essential for cell viability to the extent that a mutant strain of cerevisiae lacking it shows all RNA polymerase II-dependent transcription ceasing at non-permissive temperatures. 1.67e-46	-	-	sp|Q1DLD2|MED17_COCIM Mediator of RNA polymerase II transcription subunit 17 OS=Coccidioides immitis (strain RS) GN=SRB4 PE=3 SV=1 1.43e-53	GO:0000428, DNA-directed RNA polymerase complex;GO:0000976, transcription regulatory region sequence-specific DNA binding;GO:0000977, RNA polymerase II regulatory region sequence-specific DNA binding;GO:0000979, RNA polymerase II core promoter sequence-specific DNA binding;GO:0000988, transcription factor activity, protein binding;GO:0000990, transcription factor activity, core RNA polymerase bin…	XP_039301476.1 LOW QUALITY PROTEIN: mediator of RNA polymerase II transcription subunit 17-like [Nilaparvata lugens] 9.90e-83	-
TRINITY_DN7907_c0_g1	-0.100497	0.120697	1.52677	-1.54767	-0.69422	-1.23806	1.87294	0.981751	-0.921711	1	-	pfam09445, Methyltransf_15, RNA cap guanine-N2 methyltransferase. RNA cap guanine-N2 methyltransferases such as Schizosaccharomyces pombe Tgs1 and Giardia lamblia Tgs2 catalyze methylation of the exocyclic N2 amine of 7-methylguanosine. 1.25e-23	K14292-ko03013 RNA transport	KOG2730, KOG2730, KOG2730, Methylase [General function prediction only]. 3.00e-37	sp|Q09814|TGS1_SCHPO Trimethylguanosine synthase OS=Schizosaccharomyces pombe (strain 972 / ATCC 24843) GN=tgs1 PE=1 SV=3 3.15e-32	GO:0000003, reproduction;GO:0001510, RNA methylation;GO:0003674, molecular_function;GO:0003824, catalytic activity;GO:0005575, cellular_component;GO:0005622, intracellular;GO:0005623, cell;GO:0005634, nucleus;GO:0005730, nucleolus;GO:0006139, nucleobase-containing compound metabolic process;GO:0006396, RNA processing;GO:0006399, tRNA metabolic process;GO:0006725, cellular aromatic compound metabo…	XP_049604385.1 trimethylguanosine synthase isoform X2 [Syngnathus scovelli] 2.30e-34	-
TRINITY_DN7959_c0_g1	2.16659	0.723638	0.534291	0.0213062	-0.484594	-0.834642	-0.464174	-0.40266	-1.25976	1	-	-	-	-	-	-	-	-
TRINITY_DN7977_c0_g1	1.1299	1.3088	0.925484	-0.485921	-0.693899	-0.16339	-0.0754627	-0.979114	-0.966404	1	-	pfam05875, Ceramidase, Ceramidase. This family consists of several ceramidases. Ceramidases are enzymes involved in regulating cellular levels of ceramides, sphingoid bases, and their phosphates, EC:3.5.1.23. This family belongs to the CREST superfamily, which are distantly related to the GPCRs. 8.81e-21	K04711-ko00600 Sphingolipid metabolism	KOG2329, KOG2329, KOG2329, Alkaline ceramidase [Lipid transport and metabolism]. 8.94e-06	sp|P38298|YPC1_YEAST Alkaline ceramidase YPC1 OS=Saccharomyces cerevisiae (strain ATCC 204508 / S288c) GN=YPC1 PE=1 SV=1 1.87e-12	-	XP_026038178.1 alkaline ceramidase 3 [Astatotilapia calliptera] 9.41e-11	-
TRINITY_DN7994_c0_g1	0.234242	0.374094	1.28479	-0.770899	-0.859129	-0.911736	0.977775	0.26516	-0.594297	1	-	-	-	-	-	-	-	-
TRINITY_DN8013_c0_g1	0.308624	0.174062	2.36842	-1.90335	-1.25433	-0.901712	1.80247	0.347615	-0.941805	1	cd07091, ALDH_F1-2_Ald2-like, ALDH subfamily: ALDH families 1and 2, including 10-formyltetrahydrofolate dehydrogenase, NAD+-dependent retinal dehydrogenase 1 and related proteins. ALDH subfamily which includes the NAD+-dependent retinal dehydrogenase 1 (RALDH 1, ALDH1, EC=1.2.1.36), also known as aldehyde dehydrogenase family 1 member A1 (ALDH1A1), in humans, a homotetrameric, cytosolic enzyme th…	pfam00171, Aldedh, Aldehyde dehydrogenase family. This family of dehydrogenases act on aldehyde substrates. Members use NADP as a cofactor. The family includes the following members: The prototypical members are the aldehyde dehydrogenases EC:1.2.1.3. Succinate-semialdehyde dehydrogenase EC:1.2.1.16. Lactaldehyde dehydrogenase EC:1.2.1.22. Benzaldehyde dehydrogenase EC:1.2.1.28. Methylmalonate-se…	K00128-ko00903 Limonene and pinene degradation;ko00330 Arginine and proline metabolism;ko00280 Valine, leucine and isoleucine degradation;ko00310 Lysine degradation;ko00625 Chloroalkane and chloroalkene degradation;ko00561 Glycerolipid metabolism;ko00620 Pyruvate metabolism;ko00410 beta-Alanine metabolism;ko00040 Pentose and glucuronate interconversions;ko00071 Fatty acid degradation;ko00380 Tryp…	KOG2450, KOG2450, KOG2450, Aldehyde dehydrogenase [Energy production and conversion]. 7.18e-146	sp|P42041|ALDH_ALTAL Aldehyde dehydrogenase OS=Alternaria alternata GN=ALTA10 PE=1 SV=2 5.45e-152	-	CAH1797144.1 unnamed protein product [Owenia fusiformis] 6.57e-144	-
TRINITY_DN8022_c0_g1	0.434791	0.482298	1.04485	-0.870797	-1.29127	-1.49542	1.58434	0.36644	-0.255234	1	cd03264, ABC_drug_resistance_like, ABC-type multidrug transport system, ATPase component. The biological function of this family is not well characterized, but display ABC domains similar to members of ABCA subfamily. ABC transporters are a large family of proteins involved in the transport of a wide variety of different compounds, like sugars, ions, peptides, and more complex organic molecules. …	-	-	KOG0927, KOG0927, KOG0927, Predicted transporter (ABC superfamily) [General function prediction only]. 2.49e-06	sp|Q9UT95|YL44_SCHPO Uncharacterized ABC transporter ATP-binding protein C323.04 OS=Schizosaccharomyces pombe (strain 972 / ATCC 24843) GN=SPAC323.04 PE=3 SV=1 6.46e-66	GO:0000166, nucleotide binding;GO:0003674, molecular_function;GO:0003824, catalytic activity;GO:0005488, binding;GO:0005524, ATP binding;GO:0005575, cellular_component;GO:0005622, intracellular;GO:0005623, cell;GO:0005737, cytoplasm;GO:0005739, mitochondrion;GO:0008144, drug binding;GO:0016020, membrane;GO:0016462, pyrophosphatase activity;GO:0016787, hydrolase activity;GO:0016817, hydrolase acti…	KAJ3004000.1 hypothetical protein HDU68_005391 [Siphonaria sp. JEL0065] 1.40e-39	-
TRINITY_DN8114_c0_g1	1.69669	2.16643	0.843236	-0.784394	-0.784394	-0.784394	-0.784394	-0.784394	-0.784394	1	-	-	-	-	-	-	-	-
TRINITY_DN8163_c0_g2	0.978479	0.85094	0.794238	-0.394612	-0.73658	-0.252354	0.488142	-0.69242	-1.03583	1	cd07564, nitrilases_CHs, Nitrilases, cyanide hydratase (CH)s, and similar proteins (class 1 nitrilases). Nitrilases (nitrile aminohydrolases, EC:3.5.5.1) hydrolyze nitriles (RCN) to ammonia and the corresponding carboxylic acid. Most nitrilases prefer aromatic nitriles, some prefer arylacetonitriles and others aliphatic nitriles. This group includes the nitrilase cyanide dihydratase (CDH), which …	pfam00795, CN_hydrolase, Carbon-nitrogen hydrolase. This family contains hydrolases that break carbon-nitrogen bonds. The family includes: Nitrilase EC:3.5.5.1, Aliphatic amidase EC:3.5.1.4, Biotidinase EC:3.5.1.12, Beta-ureidopropionase EC:3.5.1.6. Nitrilase-related proteins generally have a conserved E-K-C catalytic triad, and are multimeric alpha-beta-beta-alpha sandwich proteins. 1.92e-12	-	KOG0805, KOG0805, KOG0805, Carbon-nitrogen hydrolase [Amino acid transport and metabolism]. 1.52e-13	sp|P32962|NRL2_ARATH Nitrilase 2 OS=Arabidopsis thaliana GN=NIT2 PE=1 SV=1 2.86e-09	-	CAF3333871.1 unnamed protein product [Rotaria socialis] >CAF3335695.1 unnamed protein product [Rotaria socialis] >CAF3396872.1 unnamed protein product [Rotaria socialis] >CAF4450792.1 unnamed protein product [Rotaria socialis] >CAF4453216.1 unnamed protein product [Rotaria socialis] 4.69e-58	-
TRINITY_DN8173_c0_g1	0.469829	0.74506	1.72754	-0.537396	-1.16401	-1.08287	1.09608	-0.0752305	-1.17899	1	cd02152, OAT, Ornithine acetyltransferase (OAT) family; also referred to as ArgJ. OAT catalyzes the first and fifth steps in arginine biosynthesis, coupling acetylation of glutamate with deacetylation of N-acetylornithine, which allows recycling of the acetyl group in the arginine biosynthetic pathway. Members of this family may experience feedback inhibition by L-arginine. The active enzyme is a…	pfam01960, ArgJ, ArgJ family. Members of the ArgJ family catalyze the first EC:2.3.1.1 and fifth steps EC:2.3.1.35 in arginine biosynthesis. 8.26e-92	K10755-ko03030 DNA replication;ko03430 Mismatch repair;ko03420 Nucleotide excision repair	KOG0991, KOG0991, KOG0991, Replication factor C, subunit RFC2 [Replication, recombination and repair]. 2.28e-160	sp|A4R5F6|ARGJ_MAGO7 Arginine biosynthesis bifunctional protein ArgJ, mitochondrial OS=Magnaporthe oryzae (strain 70-15 / ATCC MYA-4617 / FGSC 8958) GN=MGG_04210 PE=3 SV=2 0.0	GO:0000228, nuclear chromosome;GO:0000278, mitotic cell cycle;GO:0000785, chromatin;GO:0000790, nuclear chromatin;GO:0000819, sister chromatid segregation;GO:0003674, molecular_function;GO:0003676, nucleic acid binding;GO:0003677, DNA binding;GO:0003824, catalytic activity;GO:0005488, binding;GO:0005575, cellular_component;GO:0005622, intracellular;GO:0005623, cell;GO:0005634, nucleus;GO:0005657,…	XP_007643276.1 replication factor C subunit 2 isoform X4 [Cricetulus griseus] >XP_027271939.1 replication factor C subunit 2 isoform X9 [Cricetulus griseus] 1.57e-144	Ochropleura plecta genome assembly, chromosome: 1 1.87e-18
TRINITY_DN8182_c0_g1	0.491509	0.443314	1.08649	-0.549154	-0.599131	-0.378955	0.308103	-0.302151	-0.500029	1	cd12148, fungal_TF_MHR, fungal transcription factor regulatory middle homology region. This domain is present in the large family of fungal zinc cluster transcription factors that contain an N-terminal GAL4-like C6 zinc binuclear cluster DNA-binding domain. Examples of members of this large fungal group are the following Saccharomyces cerevisiae transcription factors, GAL4, STB5, DAL81, CAT8, RDR…	-	-	-	sp|D7PHY7|VRTR2_PENAE Transcription factor vrtR2 OS=Penicillium aethiopicum GN=vrtR2 PE=1 SV=1 1.59e-15	GO:0008150, biological_process;GO:0008152, metabolic process;GO:0009058, biosynthetic process;GO:0009889, regulation of biosynthetic process;GO:0009891, positive regulation of biosynthetic process;GO:0009893, positive regulation of metabolic process;GO:0019222, regulation of metabolic process;GO:0019748, secondary metabolic process;GO:0043455, regulation of secondary metabolic process;GO:0044550,…	-	-
TRINITY_DN8188_c0_g1	0.443234	0.527213	1.12357	-0.903825	-1.45721	-1.21849	1.68694	0.702654	-0.904089	1	-	-	-	-	-	-	CAF1269459.1 unnamed protein product [Adineta steineri] >CAF1555311.1 unnamed protein product [Adineta steineri] 4.83e-32	-
TRINITY_DN8268_c0_g1	0.655568	1.01969	1.13291	-0.79057	-0.652264	-1.1996	0.8493	-0.0133715	-1.00166	1	-	-	-	-	sp|Q5AT15|CYSA_EMENI Serine O-acetyltransferase OS=Emericella nidulans (strain FGSC A4 / ATCC 38163 / CBS 112.46 / NRRL 194 / M139) GN=cysA PE=3 SV=1 0.0	GO:0000096, sulfur amino acid metabolic process;GO:0000097, sulfur amino acid biosynthetic process;GO:0003674, molecular_function;GO:0003824, catalytic activity;GO:0004414, homoserine O-acetyltransferase activity;GO:0006082, organic acid metabolic process;GO:0006520, cellular amino acid metabolic process;GO:0006534, cysteine metabolic process;GO:0006535, cysteine biosynthetic process from serine;…	XP_014767701.1 uncharacterized protein LOC106867363 [Octopus bimaculoides] 8.09e-143	-
TRINITY_DN8272_c0_g1	1.50679	0.489423	0.96515	-0.594753	-0.970652	-0.769372	-0.119643	-0.138296	-0.36865	1	cd09596, M36, Peptidase M36 family, also known as fungalysin family. The M36 peptidase family, also known as fungalysin (elastinolytic metalloproteinase) family, includes endopeptidases from pathogenic fungi. Fungalysin can hydrolyze extracellular matrix proteins such as elastin and keratin, with a preference for cleavage on the amino side of hydrophobic residues with bulky side-chains. This fami…	pfam02128, Peptidase_M36, Fungalysin metallopeptidase (M36). 2.25e-151	-	-	sp|E3QKL1|MEP_COLGM Extracellular metalloproteinase mep OS=Colletotrichum graminicola (strain M1.001 / M2 / FGSC 10212) GN=mep PE=2 SV=1 0.0	GO:0005575, cellular_component;GO:0005576, extracellular region	KAJ3007428.1 Fungalysin/Thermolysin Extracellular metalloproteinase 5 [Siphonaria sp. JEL0065] 6.47e-103	-
TRINITY_DN8316_c0_g1	0.641475	0.469979	1.48155	-0.581207	-0.685357	-1.31587	0.922682	0.095032	-1.02828	1	cd00775, LysRS_core, Lys_tRNA synthetase (LysRS) class II core domain. Class II LysRS is a dimer which attaches a lysine to the 3' OH group of ribose of the appropriate tRNA. Its assignment to class II aaRS is based upon its structure and the presence of three characteristic sequence motifs in the core domain. It is found in eukaryotes as well as some prokaryotes and archaea. However, LysRS belon…	pfam00152, tRNA-synt_2, tRNA synthetases class II (D, K and N). 1.27e-36	K04567-ko00970 Aminoacyl-tRNA biosynthesis	KOG1885, KOG1885, KOG1885, Lysyl-tRNA synthetase (class II) [Translation, ribosomal structure and biogenesis]. 2.94e-106	sp|O74858|SYKM_SCHPO Lysine--tRNA ligase, mitochondrial OS=Schizosaccharomyces pombe (strain 972 / ATCC 24843) GN=msk1 PE=3 SV=1 1.32e-99	GO:0000049, tRNA binding;GO:0000166, nucleotide binding;GO:0000959, mitochondrial RNA metabolic process;GO:0003674, molecular_function;GO:0003676, nucleic acid binding;GO:0003723, RNA binding;GO:0003824, catalytic activity;GO:0004812, aminoacyl-tRNA ligase activity;GO:0004824, lysine-tRNA ligase activity;GO:0005488, binding;GO:0005524, ATP binding;GO:0005575, cellular_component;GO:0005622, intrac…	CAH0557472.1 unnamed protein product [Brassicogethes aeneus] 7.39e-91	-
TRINITY_DN8364_c0_g1	1.56177	1.69865	0.902234	-0.168289	-1.05077	-0.336476	-0.868435	-0.998448	-0.740238	1	cd02210, cupin_BLR2406-like, Bradyrhizobium japonicum BLR2406 and related proteins, cupin domain. This family includes bacterial and fungal proteins homologous to BLR2406, a Bradyrhizobium japonicum protein of unknown function with a cupin beta barrel domain. Proteins in this subfamily appear to align closest to RmlC carbohydrate epimerase which is involved in dTDP-L-rhamnose production, and belo…	-	-	-	-	-	-	-
TRINITY_DN8368_c0_g1	0.716749	0.575759	1.26984	-0.788773	-0.565446	-1.05939	0.465013	-0.00737385	-0.606379	1	-	pfam09696, Ctf8, Ctf8. Ctf8 (chromosome transmissions fidelity 8) is a component of the Ctf18 RFC-like complex which is a DNA clamp loader involved in sister chromatid cohesion. 1.75e-36	-	-	sp|P38877|CTF8_YEAST Chromosome transmission fidelity protein 8 OS=Saccharomyces cerevisiae (strain ATCC 204508 / S288c) GN=CTF8 PE=1 SV=1 4.63e-06	-	-	-
TRINITY_DN8457_c0_g1	2.17435	1.35402	1.06982	-0.203082	-0.949946	-0.23126	-1.26527	-0.650829	-1.2978	1	-	-	-	-	-	-	-	-
TRINITY_DN8517_c0_g1	1.02678	1.19984	1.464	-0.536519	-1.72764	-0.672614	0.627242	0.0369973	-1.41809	1	-	-	-	-	-	-	-	-
TRINITY_DN8528_c0_g1	1.34929	1.75971	1.44147	-0.434584	-2.28223	-1.81078	-0.904156	0.531513	0.349774	1	-	-	-	-	-	-	-	-
TRINITY_DN8533_c0_g1	1.08432	1.41522	1.85979	-0.988125	-1.16048	-1.26126	0.565917	-0.165931	-1.34945	1	-	pfam00180, Iso_dh, Isocitrate/isopropylmalate dehydrogenase. 5.58e-60	K05824-ko01210 2-Oxocarboxylic acid metabolism;ko00300 Lysine biosynthesis;ko01230 Biosynthesis of amino acids	KOG0785, KOG0785, KOG0785, Isocitrate dehydrogenase, alpha subunit [Amino acid transport and metabolism]. 1.33e-71	sp|O14104|LYS12_SCHPO Homoisocitrate dehydrogenase OS=Schizosaccharomyces pombe (strain 972 / ATCC 24843) GN=lys12 PE=1 SV=1 1.36e-151	GO:0003674, molecular_function;GO:0003824, catalytic activity;GO:0005575, cellular_component;GO:0005622, intracellular;GO:0005623, cell;GO:0005737, cytoplasm;GO:0005739, mitochondrion;GO:0006082, organic acid metabolic process;GO:0006520, cellular amino acid metabolic process;GO:0006553, lysine metabolic process;GO:0006807, nitrogen compound metabolic process;GO:0008150, biological_process;GO:000…	XP_039275170.1 homoisocitrate dehydrogenase-like [Nilaparvata lugens] 7.31e-174	-
TRINITY_DN8541_c0_g1	0.400291	0.0840653	0.985565	-0.478607	-0.466626	-0.411777	0.342165	-0.108717	-0.34636	1	-	pfam06985, HET, Heterokaryon incompatibility protein (HET). This family represents a conserved region approximately 150 residues long within various heterokaryon incompatibility proteins that seem to be restricted to ascomycete fungi. Genetic differences in specific het genes prevent a viable heterokaryotic fungal cell from being formed by the fusion of filaments from two different wild-type stra…	-	-	sp|Q9UV10|HET6_NEUCR Heterokaryon incompatibility protein 6, OR allele OS=Neurospora crassa (strain ATCC 24698 / 74-OR23-1A / CBS 708.71 / DSM 1257 / FGSC 987) GN=het-6 PE=4 SV=1 3.59e-29	-	KAI1691421.1 heterokaryon incompatibility protein (HET) domain-containing protein [Ditylenchus destructor] 1.33e-32	-
TRINITY_DN8584_c0_g1	0.252181	0.347951	1.23699	-0.682477	-1.04852	-0.858417	0.912572	0.427244	-0.587531	1	-	-	-	-	-	-	-	-
TRINITY_DN8596_c0_g1	-0.407843	-0.0206593	1.27291	-1.1607	-0.743602	-0.90444	1.7929	0.827286	-0.655842	1	-	-	-	KOG2752, KOG2752, KOG2752, Uncharacterized conserved protein, contains N-recognin-type Zn-finger [General function prediction only]. 9.25e-09	sp|Q09329|MLO2_SCHPO Protein mlo2 OS=Schizosaccharomyces pombe (strain 972 / ATCC 24843) GN=mlo2 PE=2 SV=1 3.58e-37	GO:0000070, mitotic sister chromatid segregation;GO:0000278, mitotic cell cycle;GO:0000280, nuclear division;GO:0000819, sister chromatid segregation;GO:0003674, molecular_function;GO:0003824, catalytic activity;GO:0004842, ubiquitin-protein transferase activity;GO:0006464, cellular protein modification process;GO:0006807, nitrogen compound metabolic process;GO:0006996, organelle organization;GO:…	XP_014275670.1 putative E3 ubiquitin-protein ligase UBR7 isoform X1 [Halyomorpha halys] 3.85e-40	-
TRINITY_DN8610_c0_g1	0.900453	1.11359	1.59919	-0.336259	-2.17086	-0.879744	-0.0739002	0.118694	-0.271155	1	-	-	-	-	-	-	-	-
TRINITY_DN8707_c0_g2	1.16575	0.662946	0.491893	-0.253406	-0.910328	-0.566578	-0.071415	-0.320408	-0.198454	1	-	pfam01425, Amidase, Amidase. 8.17e-18	-	KOG1211, KOG1211, KOG1211, Amidases [Translation, ribosomal structure and biogenesis]. 7.21e-16	sp|Q6MRL7|GATA_BDEBA Glutamyl-tRNA(Gln) amidotransferase subunit A OS=Bdellovibrio bacteriovorus (strain ATCC 15356 / DSM 50701 / NCIB 9529 / HD100) GN=gatA PE=3 SV=1 7.32e-19	-	XP_007450871.1 PREDICTED: glutamyl-tRNA(Gln) amidotransferase subunit A, mitochondrial-like, partial [Lipotes vexillifer] 6.70e-74	-
TRINITY_DN8730_c0_g1	0.12074	0.544328	1.16226	-1.196	-0.813534	-1.02008	1.42812	0.64802	-0.873853	1	-	pfam03853, YjeF_N, YjeF-related protein N-terminus. YjeF-N domain is a novel version of the Rossmann fold with a set of catalytic residues and structural features that are different from the conventional dehydrogenases. YjeF-N domain is fused to Ribokinases in bacteria (YjeF), where they may be phosphatases, and to divergent Sm and the FDF domain in eukaryotes (Dcp3p and FLJ21128), where they may…	K12615-ko03018 RNA degradation	KOG2585, KOG2585, KOG2585, Uncharacterized conserved protein [Function unknown]. 1.74e-12	sp|P39998|EDC3_YEAST Enhancer of mRNA-decapping protein 3 OS=Saccharomyces cerevisiae (strain ATCC 204508 / S288c) GN=EDC3 PE=1 SV=1 3.03e-13	GO:0000932, P-body;GO:0000956, nuclear-transcribed mRNA catabolic process;GO:0003674, molecular_function;GO:0003676, nucleic acid binding;GO:0003723, RNA binding;GO:0003729, mRNA binding;GO:0005488, binding;GO:0005575, cellular_component;GO:0005622, intracellular;GO:0005623, cell;GO:0005634, nucleus;GO:0005737, cytoplasm;GO:0006139, nucleobase-containing compound metabolic process;GO:0006401, RNA…	KAJ3032194.1 enhancer of mRNA decapping [Siphonaria sp. JEL0065] 6.07e-27	-
TRINITY_DN883_c0_g1	0.460703	0.410671	1.55249	-0.643589	-0.836356	-1.01015	0.800944	0.186126	-0.920841	1	cd11712, GINS_A_psf2, Alpha-helical domain of GINS complex protein Psf2 (partner of Sld5 2). Psf2 is a component of GINS tetrameric protein complex and has been found to play important roles in normal eye development in Xenopus laevis. GINS is a complex of four subunits (Sld5, Psf1, Psf2 and Psf3) that is involved in both initiation and elongation stages of eukaryotic chromosome replication. Besi…	-	-	KOG4071, KOG4071, KOG4071, Uncharacterized conserved protein [Function unknown]. 3.95e-15	sp|Q4IC11|PSF2_GIBZE DNA replication complex GINS protein PSF2 OS=Gibberella zeae (strain PH-1 / ATCC MYA-4620 / FGSC 9075 / NRRL 31084) GN=PSF2 PE=3 SV=1 2.15e-11	GO:0000228, nuclear chromosome;GO:0000278, mitotic cell cycle;GO:0000724, double-strand break repair via homologous recombination;GO:0000725, recombinational repair;GO:0000727, double-strand break repair via break-induced replication;GO:0000785, chromatin;GO:0000790, nuclear chromatin;GO:0000811, GINS complex;GO:0005575, cellular_component;GO:0005622, intracellular;GO:0005623, cell;GO:0005634, nu…	XP_026855315.2 DNA replication complex GINS protein PSF2 [Electrophorus electricus] 6.89e-13	-
TRINITY_DN8886_c0_g1	0.67087	1.23864	1.8912	-1.09944	-1.26886	-1.66564	0.989404	-0.174315	-0.581858	1	sd00045, ANK, ankyrin repeats. Ankyrin repeats are one of the most abundant repeat motifs, and generally function as scaffolds for protein-protein interactions in processes including cell cycle, transcriptional regulation, signal transduction, vesicular trafficking, and inflammatory response. Although predominantly found in eukaryotic proteins, they are also found in some bacterial and viral prot…	pfam12796, Ank_2, Ankyrin repeats (3 copies). 5.36e-07	-	KOG4177, KOG4177, KOG4177, Ankyrin [Cell wall/membrane/envelope biogenesis]. 7.41e-20	sp|Q8NFD2|ANKK1_HUMAN Ankyrin repeat and protein kinase domain-containing protein 1 OS=Homo sapiens GN=ANKK1 PE=2 SV=1 3.92e-13	-	PSN51182.1 hypothetical protein C0J52_06044 [Blattella germanica] 1.13e-07	-
TRINITY_DN8891_c0_g1	0.764779	0.390443	1.12402	-0.952439	-0.452024	-0.77984	0.666964	-0.386506	-0.375393	1	-	-	-	-	-	-	-	-
TRINITY_DN8903_c0_g1	0.137414	0.329738	1.32372	-0.921708	-0.856421	-1.21141	1.77613	0.774843	-1.3523	1	cd00812, LeuRS_core, catalytic core domain of leucyl-tRNA synthetases. Leucyl tRNA synthetase (LeuRS) catalytic core domain. This class I enzyme is a monomer which aminoacylates the 2'-OH of the nucleotide at the 3' of the appropriate tRNA. The core domain is based on the Rossman fold and is responsible for the ATP-dependent formation of the enzyme bound aminoacyl-adenylate. It contains the chara…	pfam13603, tRNA-synt_1_2, Leucyl-tRNA synthetase, Domain 2. This is a family of the conserved region of Leucine-tRNA ligase or Leucyl-tRNA synthetase, EC:6.1.1.4. 7.14e-22	K01869-ko00970 Aminoacyl-tRNA biosynthesis	KOG0435, KOG0435, KOG0435, Leucyl-tRNA synthetase [Translation, ribosomal structure and biogenesis]. 0.0	sp|P15181|SYLM_NEUCR Leucine--tRNA ligase, mitochondrial OS=Neurospora crassa (strain ATCC 24698 / 74-OR23-1A / CBS 708.71 / DSM 1257 / FGSC 987) GN=leu-5 PE=3 SV=1 0.0	GO:0003674, molecular_function;GO:0003824, catalytic activity;GO:0004812, aminoacyl-tRNA ligase activity;GO:0004823, leucine-tRNA ligase activity;GO:0005575, cellular_component;GO:0005622, intracellular;GO:0005623, cell;GO:0005737, cytoplasm;GO:0005739, mitochondrion;GO:0005759, mitochondrial matrix;GO:0006082, organic acid metabolic process;GO:0006139, nucleobase-containing compound metabolic pr…	XP_049849061.1 leucine--tRNA ligase-like [Schistocerca gregaria] 1.78e-194	-
TRINITY_DN8949_c0_g1	0.646944	0.66888	1.38636	-0.695738	-1.34759	-1.04055	0.812748	-0.0191948	-0.411861	1	-	-	-	-	-	-	-	-
TRINITY_DN8987_c0_g1	0.455878	0.306579	1.7372	-0.842902	-0.954205	-0.600102	1.2221	-0.0106496	-1.3139	1	cd01943, MAK32, MAK32 kinase. MAK32 is a protein found primarily in fungi that is necessary for the structural stability of L-A particles. The L-A virus particule is a specialized compartment for the transcription and replication of double-stranded RNA, known to infect yeast and other fungi. MAK32 is part of the host machinery used by the virus to multiply. 4.94e-63	-	-	-	sp|P23060|MAK32_YEAST Protein MAK32 OS=Saccharomyces cerevisiae (strain ATCC 204508 / S288c) GN=MAK32 PE=4 SV=2 2.59e-31	GO:0003674, molecular_function;GO:0003824, catalytic activity;GO:0005575, cellular_component;GO:0005622, intracellular;GO:0005623, cell;GO:0005737, cytoplasm;GO:0005975, carbohydrate metabolic process;GO:0006793, phosphorus metabolic process;GO:0006796, phosphate-containing compound metabolic process;GO:0008150, biological_process;GO:0008152, metabolic process;GO:0009987, cellular process;GO:0016…	KAJ3003831.1 hypothetical protein HDU68_005480 [Siphonaria sp. JEL0065] 1.58e-19	-
TRINITY_DN9018_c0_g1	1.00355	0.944441	0.903761	0.0132916	-1.39239	-0.160275	-0.514795	-0.550597	-0.246987	1	-	pfam03055, RPE65, Retinal pigment epithelial membrane protein. This family represents a retinal pigment epithelial membrane receptor which is abundantly expressed in retinal pigment epithelium, and binds plasma retinal binding protein. The family also includes the sequence related neoxanthin cleavage enzyme in plants and lignostilbene-alpha,beta-dioxygenase in bacteria. 9.09e-42	-	KOG1285, KOG1285, KOG1285, Beta, beta-carotene 15,15'-dioxygenase and related enzymes [Secondary metabolites biosynthesis, transport and catabolism]. 4.73e-08	sp|C3VEQ4|CCD1_ONCHC Carotenoid 9,10(9',10')-cleavage dioxygenase 1 OS=Oncidium hybrid cultivar GN=CCD1 PE=2 SV=1 3.80e-50	-	MCL4116348.1 hypothetical protein [Idotea baltica] 1.02e-29	-
TRINITY_DN9075_c0_g1	0.580662	0.673319	1.41752	-1.00212	-1.06666	-1.03367	0.896846	0.281347	-0.747252	1	cd09617, Peptidase_C12_UCH37_BAP1, Cysteine peptidase C12 containing ubiquitin carboxyl-terminal hydrolase (UCH) families UCH37 (UCH-L5) and BAP1. This ubiquitin C-terminal hydrolase (UCH) family includes UCH37 (also known as UCH-L5) and BRCA1-associated protein-1 (BAP1). They contain a UCH catalytic domain as well as an additional C-terminal extension which plays a role in protein-protein intera…	pfam01088, Peptidase_C12, Ubiquitin carboxyl-terminal hydrolase, family 1. 1.30e-43	-	KOG2778, KOG2778, KOG2778, Ubiquitin C-terminal hydrolase [Posttranslational modification, protein turnover, chaperones]. 7.98e-62	sp|Q9UUB6|UBLH2_SCHPO Ubiquitin carboxyl-terminal hydrolase 2 OS=Schizosaccharomyces pombe (strain 972 / ATCC 24843) GN=uch2 PE=1 SV=1 1.32e-84	GO:0000338, protein deneddylation;GO:0003674, molecular_function;GO:0003824, catalytic activity;GO:0004843, thiol-dependent ubiquitin-specific protease activity;GO:0005575, cellular_component;GO:0005622, intracellular;GO:0005623, cell;GO:0005737, cytoplasm;GO:0006464, cellular protein modification process;GO:0006508, proteolysis;GO:0006511, ubiquitin-dependent protein catabolic process;GO:0006515…	XP_038650817.1 ubiquitin carboxyl-terminal hydrolase isozyme L5 isoform X2 [Scyliorhinus canicula] 1.09e-57	-
TRINITY_DN9076_c0_g1	0.555134	0.54717	1.53949	-0.459727	-1.32123	-0.569715	0.313407	0.0656873	-0.670216	1	-	-	-	-	-	-	-	-
TRINITY_DN9095_c0_g2	1.24188	0.639886	1.05556	0.0345677	-0.771246	-0.258448	-0.469127	-0.744198	-0.728875	1	-	pfam03972, MmgE_PrpD, MmgE/PrpD family. This family includes 2-methylcitrate dehydratase EC:4.2.1.79 (PrpD) that is required for propionate catabolism. It catalyzes the third step of the 2-methylcitric acid cycle. 2.00e-52	-	-	sp|P54956|YXEQ_BACSU Uncharacterized protein YxeQ OS=Bacillus subtilis (strain 168) GN=yxeQ PE=3 SV=2 3.74e-35	-	XP_013293565.1 hypothetical protein NECAME_19382, partial [Necator americanus] >ETN71338.1 hypothetical protein NECAME_19382, partial [Necator americanus] 4.63e-60	-
TRINITY_DN9124_c0_g1	0.982285	0.738494	1.35979	-0.501997	-1.1976	-0.901738	0.435345	-0.185681	-0.728896	1	-	-	-	-	sp|Q59QC7|UPC2_CANAL Sterol uptake control protein 2 OS=Candida albicans (strain SC5314 / ATCC MYA-2876) GN=UPC2 PE=1 SV=1 3.56e-07	-	-	-
TRINITY_DN9128_c0_g1	0.593486	0.912573	1.59831	-0.719337	-1.03829	-0.950971	0.732466	-0.186749	-0.941488	1	cd12110, PHP_HisPPase_Hisj_like, Polymerase and Histidinol Phosphatase domain of Histidinol phosphate phosphatase of Hisj like. Bacillus subtilis YtvP HisJ has strong histidinol phosphate phosphatase (HisPPase) activity. The PHP (also called histidinol phosphatase-2/HIS2) domain is associated with several types of DNA polymerases, such as PolIIIA and family X DNA polymerases, stand alone histidin…	-	K04486-ko01230 Biosynthesis of amino acids;ko00340 Histidine metabolism	-	sp|O14059|HIS9_SCHPO Probable histidinol-phosphatase OS=Schizosaccharomyces pombe (strain 972 / ATCC 24843) GN=SPCC1672.01 PE=3 SV=1 2.61e-58	GO:0000105, histidine biosynthetic process;GO:0003674, molecular_function;GO:0003824, catalytic activity;GO:0004401, histidinol-phosphatase activity;GO:0005575, cellular_component;GO:0005622, intracellular;GO:0005623, cell;GO:0005737, cytoplasm;GO:0006082, organic acid metabolic process;GO:0006520, cellular amino acid metabolic process;GO:0006547, histidine metabolic process;GO:0006725, cellular …	XP_022800689.1 probable histidinol-phosphatase [Stylophora pistillata] >PFX19234.1 putative histidinol-phosphatase [Stylophora pistillata] 1.30e-58	-
TRINITY_DN9155_c0_g1	1.51543	0.981421	0.740774	-0.122584	-0.726001	-0.633284	-0.527677	-0.576896	-0.651184	1	-	-	-	-	-	-	-	-
TRINITY_DN9173_c0_g1	0.38153	0.702226	1.2792	-0.64146	-1.56789	-1.04781	1.15162	0.202437	-0.459852	1	cd00331, IGPS, Indole-3-glycerol phosphate synthase (IGPS); an enzyme in the tryptophan biosynthetic pathway, catalyzing the ring closure reaction of 1-(o-carboxyphenylamino)-1-deoxyribulose-5-phosphate (CdRP) to indole-3-glycerol phosphate (IGP), accompanied by the release of carbon dioxide and water. IGPS is active as a separate monomer in most organisms, but is also found fused to other enzyme…	pfam00218, IGPS, Indole-3-glycerol phosphate synthase. 4.84e-71	K13501-ko00400 Phenylalanine, tyrosine and tryptophan biosynthesis;ko01230 Biosynthesis of amino acids	KOG4201, KOG4201, KOG4201, Anthranilate synthase component II [Amino acid transport and metabolism]. 3.43e-84	sp|P00908|TRPG_NEUCR Multifunctional tryptophan biosynthesis protein OS=Neurospora crassa (strain ATCC 24698 / 74-OR23-1A / CBS 708.71 / DSM 1257 / FGSC 987) GN=trp-1 PE=3 SV=2 0.0	GO:0000162, tryptophan biosynthetic process;GO:0003674, molecular_function;GO:0003824, catalytic activity;GO:0004049, anthranilate synthase activity;GO:0004425, indole-3-glycerol-phosphate synthase activity;GO:0004640, phosphoribosylanthranilate isomerase activity;GO:0005575, cellular_component;GO:0005622, intracellular;GO:0005623, cell;GO:0005737, cytoplasm;GO:0005950, anthranilate synthase comp…	KAJ3028223.1 bifunctional tryptophan synthase trp1 [Siphonaria sp. JEL0065] 3.91e-185	-
TRINITY_DN9176_c0_g2	1.02731	0.936665	1.10057	-0.42002	-0.557722	-0.499965	-0.566651	-0.44557	-0.574618	1	-	-	-	-	-	-	CAF3807877.1 unnamed protein product [Rotaria sp. Silwood1] >CAF4775400.1 unnamed protein product [Rotaria sp. Silwood1] 7.05e-08	-
TRINITY_DN9181_c0_g1	-0.331712	1.78475	2.1964	-1.00705	-0.350133	-0.891528	-0.000933418	-0.434078	-0.965714	1	-	-	-	-	-	-	XP_037033187.1 taurine hydroxylase-like protein SAT17 [Bradysia coprophila] 1.80e-186	-
TRINITY_DN9210_c0_g1	1.08084	1.14525	1.05561	-0.0253369	-1.1755	0.480992	-1.13271	-0.786261	-0.642877	1	-	-	-	-	-	-	-	-
TRINITY_DN9213_c0_g2	0.992868	1.10515	1.60395	-1.14781	-1.39166	-0.967915	0.944327	-0.00352411	-1.13539	1	-	-	-	KOG2665, KOG2665, KOG2665, Predicted FAD-dependent oxidoreductase [Function unknown]. 2.41e-34	sp|P37339|LHGO_ECOLI L-2-hydroxyglutarate oxidase LhgO OS=Escherichia coli (strain K12) GN=lhgO PE=1 SV=3 3.04e-27	-	XP_040091681.1 L-2-hydroxyglutarate dehydrogenase, mitochondrial-like [Oryx dammah] 1.67e-61	-
TRINITY_DN9244_c0_g1	-0.524455	-0.157805	1.86567	-1.07752	-0.994424	-1.13088	1.43323	0.666286	-0.0801025	1	-	-	-	KOG2659, KOG2659, KOG2659, LisH motif-containing protein [Cytoskeleton]. 3.61e-11	sp|A7SWD3|GID8_NEMVE Glucose-induced degradation protein 8 homolog OS=Nematostella vectensis GN=v1g247787 PE=3 SV=1 4.22e-09	GO:0005575, cellular_component;GO:0005622, intracellular;GO:0005623, cell;GO:0006109, regulation of carbohydrate metabolic process;GO:0006111, regulation of gluconeogenesis;GO:0006508, proteolysis;GO:0006511, ubiquitin-dependent protein catabolic process;GO:0006807, nitrogen compound metabolic process;GO:0008150, biological_process;GO:0008152, metabolic process;GO:0009056, catabolic process;GO:00…	XP_022097849.1 glucose-induced degradation protein 8 homolog [Acanthaster planci] 9.34e-22	-
TRINITY_DN9261_c0_g1	0.237923	0.285824	1.35383	-0.982327	-0.844233	-1.01218	1.64812	0.0572246	-0.744179	1	-	pfam10343, Q_salvage, Potential Queuosine, Q, salvage protein family. Q_salvage proteins occur in most Eukarya as well as in a few bacteria possible via horizontal gene-transfer. Queuosine (Q) is a chemical modification found at the wobble position of tRNAs that have GUN anticodons. Most bacteria synthesize queuosine de novo, whereas eukaryotes rely solely on salvaging this essential component fr…	-	KOG2524, KOG2524, KOG2524, Cobyrinic acid a,c-diamide synthase [Coenzyme transport and metabolism]. 1.72e-22	sp|Q5T6V5|CI064_HUMAN UPF0553 protein C9orf64 OS=Homo sapiens GN=C9orf64 PE=1 SV=1 8.86e-57	GO:0003674, molecular_function;GO:0003824, catalytic activity;GO:0006139, nucleobase-containing compound metabolic process;GO:0006396, RNA processing;GO:0006399, tRNA metabolic process;GO:0006400, tRNA modification;GO:0006725, cellular aromatic compound metabolic process;GO:0006807, nitrogen compound metabolic process;GO:0008033, tRNA processing;GO:0008150, biological_process;GO:0008152, metaboli…	XP_015514096.2 queuosine salvage protein [Neodiprion lecontei] 4.15e-42	-
TRINITY_DN9276_c0_g1	1.19628	0.877862	0.995804	-0.344401	-0.425484	-0.389725	-0.886339	-0.694794	-0.329205	1	cd11041, CYP503A1-like, cytochrome P450 family 503, subfamily A, polypeptide 1 and similar cytochrome P450s. This family is composed of predominantly fungal cytochrome P450s (CYPs) with similarity to Fusarium fujikuroi Cytochrome P450 503A1 (CYP503A1, also called ent-kaurene oxidase or cytochrome P450-4), Aspergillus nidulans austinol synthesis protein I (ausI), Alternaria alternata tentoxin synt…	pfam00067, p450, Cytochrome P450. Cytochrome P450s are haem-thiolate proteins involved in the oxidative degradation of various compounds. They are particularly well known for their role in the degradation of environmental toxins and mutagens. They can be divided into 4 classes, according to the method by which electrons from NAD(P)H are delivered to the catalytic site. Sequence conservation is re…	-	KOG0684, KOG0684, KOG0684, Cytochrome P450 [Secondary metabolites biosynthesis, transport and catabolism]. 2.00e-10	sp|Q9C449|PAXP_PENPX Cytochrome P450 monooxygenase paxP OS=Penicillium paxilli GN=paxP PE=1 SV=1 9.89e-60	-	PFX34011.1 Cytochrome P450 3A12 [Stylophora pistillata] 4.97e-20	-
TRINITY_DN9306_c0_g1	1.28748	1.03404	1.2814	-0.234952	-0.749119	-0.581823	-0.905277	-0.512384	-0.619364	1	-	pfam03328, HpcH_HpaI, HpcH/HpaI aldolase/citrate lyase family. This family includes 2,4-dihydroxyhept-2-ene-1,7-dioic acid aldolase and 4-hydroxy-2-oxovalerate aldolase. 7.77e-12	-	-	sp|O86013|BPHF_NOVAR 4-hydroxy-2-oxovalerate aldolase OS=Novosphingobium aromaticivorans GN=bphF PE=3 SV=1 1.12e-19	-	MCL4142621.1 hypothetical protein [Idotea baltica] 6.48e-20	-
TRINITY_DN9315_c0_g1	0.311523	0.541345	1.81918	-0.46463	-0.782817	-1.05939	1.0882	0.0416346	-1.49504	1	-	pfam10568, Tom37, Outer mitochondrial membrane transport complex protein. The TOM37 protein is one of the outer membrane proteins that make up the TOM complex for guiding cytosolic mitochondrial beta-barrel proteins from the cytosol across the outer mitochondrial membrane into the intra-membrane space. In conjunction with TOM70 it guides peptides without an MTS into TOM40, the protein that forms …	-	KOG3028, KOG3028, KOG3028, Translocase of outer mitochondrial membrane complex, subunit TOM37/Metaxin 1 [Intracellular trafficking, secretion, and vesicular transport]. 1.13e-12	sp|Q4VBW0|MTX3_DANRE Metaxin-3 OS=Danio rerio GN=mtx3 PE=2 SV=2 2.89e-09	GO:0001401, mitochondrial sorting and assembly machinery complex;GO:0005575, cellular_component;GO:0005622, intracellular;GO:0005623, cell;GO:0005737, cytoplasm;GO:0005739, mitochondrion;GO:0005740, mitochondrial envelope;GO:0005741, mitochondrial outer membrane;GO:0006996, organelle organization;GO:0007005, mitochondrion organization;GO:0007006, mitochondrial membrane organization;GO:0007008, ou…	XP_013385715.1 metaxin-1 isoform X2 [Lingula anatina] 7.52e-10	-
TRINITY_DN9329_c0_g2	0.518106	0.521872	1.20472	-0.838983	-0.954124	-0.855417	1.35433	0.196597	-1.1471	1	cd05285, sorbitol_DH, Sorbitol dehydrogenase. Sorbitol and aldose reductase are NAD(+) binding proteins of the polyol pathway, which interconverts glucose and fructose. Sorbitol dehydrogenase is tetrameric and has a single catalytic zinc per subunit. Aldose reductase catalyzes the NADP(H)-dependent conversion of glucose to sorbital, and SDH uses NAD(H) in the conversion of sorbitol to fructose. N…	pfam08240, ADH_N, Alcohol dehydrogenase GroES-like domain. This is the catalytic domain of alcohol dehydrogenases. Many of them contain an inserted zinc binding domain. This domain has a GroES-like structure. 1.83e-23	K00008-ko00040 Pentose and glucuronate interconversions;ko00051 Fructose and mannose metabolism	KOG0024, KOG0024, KOG0024, Sorbitol dehydrogenase [Secondary metabolites biosynthesis, transport and catabolism]. 3.35e-64	sp|Q7S8C8|CSN6_NEUCR COP9 signalosome complex subunit 6 OS=Neurospora crassa (strain ATCC 24698 / 74-OR23-1A / CBS 708.71 / DSM 1257 / FGSC 987) GN=csn-6 PE=1 SV=1 5.35e-66	-	XP_001624910.2 sorbitol dehydrogenase [Nematostella vectensis] 1.68e-80	-
TRINITY_DN9340_c0_g1	1.66314	1.75492	1.3576	-0.362152	-1.09753	-0.120358	-1.09753	-1.09753	-1.00056	1	-	-	-	-	-	-	-	-
TRINITY_DN9351_c0_g1	0.829665	0.854702	2.13201	-1.21623	-1.49766	-1.06321	1.16304	0.0781681	-1.28049	1	-	-	-	-	-	-	-	-
TRINITY_DN9407_c0_g1	2.40595	1.83755	0.698893	-0.640788	-0.933129	-0.569095	-0.933129	-0.933129	-0.933129	1	cd17323, MFS_Tpo1_MDR_like, Yeast Polyamine transporter 1 (Tpo1) and similar multidrug resistance (MDR) transporters of the Major Facilitator Superfamily. This family is composed of fungal multidrug resistance (MDR) transporters including several proteins from Saccharomyces cerevisiae such as polyamine transporters 1-4 (Tpo1-4), quinidine resistance proteins 1-3 (Qdr1-3), dityrosine transporter 1…	-	-	-	sp|O59700|YN43_SCHPO Uncharacterized transporter C36.03c OS=Schizosaccharomyces pombe (strain 972 / ATCC 24843) GN=SPBC36.03c PE=3 SV=1 9.51e-33	-	CAF1212513.1 unnamed protein product [Adineta steineri] >CAF1494558.1 unnamed protein product [Adineta steineri] 1.06e-31	-
TRINITY_DN9438_c0_g1	0.729652	0.396586	1.01653	-0.987644	-1.01037	-1.25823	1.61948	0.152888	-0.658896	1	-	-	-	KOG1508, KOG1508, KOG1508, DNA replication factor/protein phosphatase inhibitor SET/SPR-2 [Replication, recombination and repair]. 6.74e-09	sp|Q9HGN2|YO48_SCHPO Putative nucleosome assembly protein C36B7.08c OS=Schizosaccharomyces pombe (strain 972 / ATCC 24843) GN=SPBC36B7.08c PE=1 SV=1 1.96e-13	GO:0000228, nuclear chromosome;GO:0000775, chromosome, centromeric region;GO:0000785, chromatin;GO:0000790, nuclear chromatin;GO:0001672, regulation of chromatin assembly or disassembly;GO:0003674, molecular_function;GO:0005488, binding;GO:0005515, protein binding;GO:0005575, cellular_component;GO:0005622, intracellular;GO:0005623, cell;GO:0005634, nucleus;GO:0005694, chromosome;GO:0006325, chrom…	XP_041529397.1 protein SET-like [Microtus oregoni] 5.15e-09	-
TRINITY_DN9482_c0_g1	1.37411	0.766995	0.989054	-0.484907	-0.578676	-0.520729	-0.608968	-0.539937	-0.396945	1	-	-	-	-	-	-	-	-
TRINITY_DN9489_c0_g1	0.415661	0.368389	1.2134	-0.810196	-1.60763	-0.851119	1.01864	0.487489	-0.23463	1	cd14966, 7tmD_STE3, fungal a-factor pheromone receptor STE3, member of the class D family of seven-transmembrane G protein-coupled receptors. This subfamily represents the a-factor pheromone receptor encoded by the STE3 gene, which is required for pheromone sensing and mating in haploid cells of the yeast Saccharomyces cerevisiae. The STE3-encoded seven-transmembrane domain receptor is a member o…	pfam02076, STE3, Pheromone A receptor. 1.49e-15	K04627-ko04011 MAPK signaling pathway - yeast	-	sp|P06783|STE3_YEAST Pheromone a factor receptor OS=Saccharomyces cerevisiae (strain ATCC 204508 / S288c) GN=STE3 PE=1 SV=1 5.31e-09	-	-	-
TRINITY_DN9495_c0_g1	0.90963	1.58163	1.48275	0.295197	-1.69469	-0.810201	-0.70735	-0.602387	-0.454573	1	-	-	-	-	-	-	-	-
TRINITY_DN9577_c0_g1	1.56562	0.834475	1.11246	-0.377485	-0.877482	-1.44064	-0.148352	-0.0804847	-0.588114	1	-	-	-	-	-	-	-	-
TRINITY_DN9588_c0_g1	0.62695	1.18532	1.7306	-1.33513	-0.929068	-0.881376	1.09836	-0.170949	-1.32471	1	-	-	-	-	-	GO:0000123, histone acetyltransferase complex;GO:0000228, nuclear chromosome;GO:0000785, chromatin;GO:0000790, nuclear chromatin;GO:0003674, molecular_function;GO:0005488, binding;GO:0005515, protein binding;GO:0005575, cellular_component;GO:0005622, intracellular;GO:0005623, cell;GO:0005634, nucleus;GO:0005654, nucleoplasm;GO:0005694, chromosome;GO:0006323, DNA packaging;GO:0006325, chromatin or…	-	-
TRINITY_DN9665_c0_g1	1.00315	0.515379	0.566752	-0.455662	-0.416621	-0.569527	0.398351	-0.506633	-0.535189	1	cd06179, MFS_TRI12_like, Fungal trichothecene efflux pump (TRI12) of the Major Facilitator Superfamily of transporters. This family includes Fusarium sporotrichioides trichothecene efflux pump (TRI12), which may play a role in F. sporotrichioides self-protection against trichothecenes. TRI12 belongs to the Major Facilitator Superfamily (MFS) of membrane transport proteins, which are thought to fu…	pfam06609, TRI12, Fungal trichothecene efflux pump (TRI12). This family consists of several fungal specific trichothecene efflux pump proteins. Many of the genes involved in trichothecene toxin biosynthesis in Fusarium sporotrichioides are present within a gene cluster.It has been suggested that TRI12 may play a role in F. sporotrichioides self-protection against trichothecenes. 2.30e-11	-	-	sp|O42922|YBIH_SCHPO Uncharacterized MFS-type transporter C16A3.17c OS=Schizosaccharomyces pombe (strain 972 / ATCC 24843) GN=SPBC16A3.17c PE=3 SV=1 5.76e-31	-	KAJ3024382.1 hypothetical protein HDU68_008231 [Siphonaria sp. JEL0065] 1.46e-39	-
TRINITY_DN9720_c0_g1	0.568855	0.493042	1.35106	-0.734625	-1.00611	-0.622076	0.470281	0.0983467	-0.618776	1	-	-	-	-	-	-	-	-
TRINITY_DN9742_c0_g1	-0.185578	0.121918	1.40037	-1.25463	-0.419261	-1.51771	1.73678	0.527192	-0.409075	1	cd10535, SET_EHMT1, SET domain (including pre-SET and post-SET domains) found in euchromatic histone-lysine N-methyltransferase 1 (EHMT1) and similar proteins. EHMT1 (also termed Eu-HMTase1, G9a-like protein 1, GLP, GLP1, histone H3-K9 methyltransferase 5, H3-K9-HMTase 5, or lysine N-methyltransferase 1D (KMT1D)) acts as a histone-lysine N-methyltransferase that specifically mono- and dimethylate…	pfam01532, Glyco_hydro_47, Glycosyl hydrolase family 47. Members of this family are alpha-mannosidases that catalyze the hydrolysis of the terminal 1,2-linked alpha-D-mannose residues in the oligo-mannose oligosaccharide Man(9)(GlcNAc)(2). 9.85e-118	K01230-ko00510 N-Glycan biosynthesis;ko04141 Protein processing in endoplasmic reticulum;ko00513 Various types of N-glycan biosynthesis	KOG2431, KOG2431, KOG2431, 1, 2-alpha-mannosidase [Carbohydrate transport and metabolism]. 5.59e-71	sp|Q9UKM7|MA1B1_HUMAN Endoplasmic reticulum mannosyl-oligosaccharide 1,2-alpha-mannosidase OS=Homo sapiens GN=MAN1B1 PE=1 SV=2 8.58e-72	-	KAG9469186.1 hypothetical protein GDO78_021086 [Eleutherodactylus coqui] 1.27e-77	-
TRINITY_DN9744_c0_g1	1.55139	1.49841	1.26434	-0.798862	-0.641475	-0.758186	-0.290796	-0.872883	-0.951938	1	-	-	-	-	sp|Q00808|HETE1_PODAS Vegetative incompatibility protein HET-E-1 OS=Podospora anserina GN=HET-E1 PE=3 SV=1 1.27e-51	-	CAF1317610.1 unnamed protein product [Rotaria sp. Silwood1] 2.01e-07	-
TRINITY_DN9747_c0_g1	0.483253	0.511554	1.20531	-1.10923	-0.943475	-1.15472	1.58727	0.381512	-0.96147	1	cd18983, CBD_MSL3_like, chromo barrel domain of human male-specific lethal complex subunit 3, and similar proteins. This subgroup includes human male-specific lethal (MSL) complex subunit 3 (MSL3, also known as MSL3L1). The MSL3 chromodomain specifically recognizes the H4K20 monomethyl mark, in a DNA-dependent manner, and may be involved in chromosomal targeting of the MSL complex. Also included …	pfam05712, MRG, MRG. This family consists of three different eukaryotic proteins (mortality factor 4 (MORF4/MRG15), male-specific lethal 3(MSL-3) and ESA1-associated factor 3(EAF3)). It is thought that the MRG family is involved in transcriptional regulation via histone acetylation. It contains 2 chromo domains and a leucine zipper motif. 4.15e-51	-	KOG3001, KOG3001, KOG3001, Dosage compensation regulatory complex/histone acetyltransferase complex, subunit MSL-3/MRG15/EAF3, and related CHROMO domain-containing proteins [Chromatin structure and dynamics, Transcription]. 4.37e-21	sp|Q5BBV4|EAF3_EMENI Chromatin modification-related protein eaf3 OS=Emericella nidulans (strain FGSC A4 / ATCC 38163 / CBS 112.46 / NRRL 194 / M139) GN=eaf3 PE=3 SV=1 3.78e-24	-	XP_030044736.1 mortality factor 4-like protein 1, partial [Microcaecilia unicolor] 1.11e-12	-
TRINITY_DN9784_c0_g2	1.3994	1.32516	1.29627	-0.342183	-1.4633	-0.696007	-0.556942	-0.611465	-0.350925	1	-	-	-	-	-	-	-	-
TRINITY_DN9792_c0_g1	2.36765	1.29185	1.46071	-1.04756	-1.04756	-1.04756	-1.04756	-1.04756	0.117599	1	-	-	-	-	-	-	-	-
TRINITY_DN9794_c0_g1	0.812322	1.31568	1.96331	-1.16829	-1.39686	-1.46476	1.21761	0.219071	-1.49808	1	-	pfam00185, OTCace, Aspartate/ornithine carbamoyltransferase, Asp/Orn binding domain. 4.70e-36	K00611-ko01230 Biosynthesis of amino acids;ko00220 Arginine biosynthesis	KOG1504, KOG1504, KOG1504, Ornithine carbamoyltransferase OTC/ARG3 [Amino acid transport and metabolism]. 1.85e-102	sp|P11803|OTC_EMENI Ornithine carbamoyltransferase, mitochondrial OS=Emericella nidulans (strain FGSC A4 / ATCC 38163 / CBS 112.46 / NRRL 194 / M139) GN=argB PE=2 SV=1 1.06e-165	GO:0000050, urea cycle;GO:0003674, molecular_function;GO:0003824, catalytic activity;GO:0004585, ornithine carbamoyltransferase activity;GO:0005575, cellular_component;GO:0005622, intracellular;GO:0005623, cell;GO:0005737, cytoplasm;GO:0005739, mitochondrion;GO:0005759, mitochondrial matrix;GO:0005829, cytosol;GO:0006082, organic acid metabolic process;GO:0006520, cellular amino acid metabolic pr…	XP_043853539.1 ornithine transcarbamylase, mitochondrial [Dromiciops gliroides] 2.00e-89	-
TRINITY_DN9803_c0_g1	0.391743	0.995826	1.16359	-0.872975	-0.830029	-1.06027	1.09568	-0.136165	-0.747395	1	cd01830, XynE_like, SGNH_hydrolase subfamily, similar to the putative arylesterase/acylhydrolase from the rumen anaerobe Prevotella bryantii XynE. The P. bryantii XynE gene is located in a xylanase gene cluster. SGNH hydrolases are a diverse family of lipases and esterases. The tertiary fold of the enzyme is substantially different from that of the alpha/beta hydrolase family and unique among all…	-	-	-	-	-	XP_037040728.1 uncharacterized protein LOC119077614 [Bradysia coprophila] 1.26e-106	-
TRINITY_DN9876_c0_g1	0.379966	1.98002	2.3611	-0.142624	-0.95075	-0.775467	-0.95075	-0.95075	-0.95075	1	-	-	-	-	-	-	-	-
TRINITY_DN9914_c0_g1	0.456825	0.726072	2.2788	-1.36241	-0.564386	-1.29937	0.458508	-0.0633252	-0.630701	1	cd07114, ALDH_DhaS, Uncharacterized Candidatus pelagibacter aldehyde dehydrogenase, DhaS-like. Uncharacterized aldehyde dehydrogenase from Candidatus pelagibacter (DhaS) and other related sequences are present in this CD. 1.39e-102	pfam00171, Aldedh, Aldehyde dehydrogenase family. This family of dehydrogenases act on aldehyde substrates. Members use NADP as a cofactor. The family includes the following members: The prototypical members are the aldehyde dehydrogenases EC:1.2.1.3. Succinate-semialdehyde dehydrogenase EC:1.2.1.16. Lactaldehyde dehydrogenase EC:1.2.1.22. Benzaldehyde dehydrogenase EC:1.2.1.28. Methylmalonate-se…	-	KOG2450, KOG2450, KOG2450, Aldehyde dehydrogenase [Energy production and conversion]. 6.58e-86	sp|P17202|BADH_SPIOL Betaine aldehyde dehydrogenase, chloroplastic OS=Spinacia oleracea PE=1 SV=1 1.21e-74	-	KAG4081050.1 hypothetical protein HA402_010221 [Bradysia odoriphaga] 1.50e-92	-
TRINITY_DN9917_c0_g1	1.19674	0.885132	1.51143	0.0224283	-1.01058	-0.443288	-0.530737	-0.604103	-1.02702	1	cd08942, RhlG_SDR_c, RhlG and related beta-ketoacyl reductases, classical (c) SDRs. Pseudomonas aeruginosa RhlG is an SDR-family beta-ketoacyl reductase involved in Rhamnolipid biosynthesis. RhlG is similar to but distinct from the FabG family of beta-ketoacyl-acyl carrier protein (ACP) of type II fatty acid synthesis. RhlG and related proteins are classical SDRs, with a canonical active site tet…	pfam13561, adh_short_C2, Enoyl-(Acyl carrier protein) reductase. 3.50e-20	-	KOG0725, KOG0725, KOG0725, Reductases with broad range of substrate specificities [General function prediction only]. 6.60e-30	sp|Q9RPT1|RHLG_PSEAE Rhamnolipids biosynthesis 3-oxoacyl-[acyl-carrier-protein] reductase OS=Pseudomonas aeruginosa (strain ATCC 15692 / PAO1 / 1C / PRS 101 / LMG 12228) GN=rhlG PE=1 SV=1 7.10e-29	-	KAJ3014027.1 hypothetical protein HDU68_000456 [Siphonaria sp. JEL0065] 3.27e-28	-
TRINITY_DN9925_c0_g1	1.26725	1.39958	0.548397	-0.00917926	-1.08128	-0.216326	-0.744527	-0.671382	-0.492527	1	-	-	-	-	-	-	-	-
TRINITY_DN9944_c0_g1	0.753706	0.738162	1.35859	-1.0023	-1.17829	-1.31619	0.590578	0.110364	-0.0546206	1	-	-	-	-	-	-	-	-
TRINITY_DN9970_c0_g1	0.531931	1.08862	1.28324	-0.993143	-0.719781	-0.873168	0.697087	-0.0287755	-0.98601	1	cd07011, cupin_PMI_type_I_N, type I phosphomannose isomerase in eukaryotes and bacteria, N-terminal cupin domain. This subfamily contains type I phosphomannose isomerase (PMI; E.C. 5.3.1.8; also known as mannose-6-phosphate isomerase) found in eukaryotes and some bacteria such as Salmonella enterica. PMI catalyzes the reversible isomerization of fructose-6-phosphate (F6P) and mannose-6-phosphate …	pfam01238, PMI_typeI, Phosphomannose isomerase type I. This is a family of Phosphomannose isomerase type I enzymes (EC 5.3.1.8). 1.26e-118	K01809-ko00051 Fructose and mannose metabolism;ko00520 Amino sugar and nucleotide sugar metabolism	KOG2757, KOG2757, KOG2757, Mannose-6-phosphate isomerase [Carbohydrate transport and metabolism]. 8.92e-118	sp|Q66WM4|MPI_ASPFU Mannose-6-phosphate isomerase OS=Neosartorya fumigata (strain ATCC MYA-4609 / Af293 / CBS 101355 / FGSC A1100) GN=pmi1 PE=2 SV=2 0.0	GO:0000032, cell wall mannoprotein biosynthetic process;GO:0003674, molecular_function;GO:0003824, catalytic activity;GO:0004476, mannose-6-phosphate isomerase activity;GO:0005575, cellular_component;GO:0005622, intracellular;GO:0005623, cell;GO:0005634, nucleus;GO:0005737, cytoplasm;GO:0005975, carbohydrate metabolic process;GO:0005996, monosaccharide metabolic process;GO:0006013, mannose metabo…	CAH1782177.1 unnamed protein product, partial [Owenia fusiformis] 3.11e-102	-
TRINITY_DN998_c0_g1	1.67463	1.73209	0.481077	-0.674828	-0.674828	-0.613289	-0.575199	-0.674828	-0.674828	1	cd00312, Esterase_lipase, Esterases and lipases (includes fungal lipases, cholinesterases, etc.) These enzymes act on carboxylic esters (EC: 3.1.1.-). The catalytic apparatus involves three residues (catalytic triad): a serine, a glutamate or aspartate and a histidine.These catalytic residues are responsible for the nucleophilic attack on the carbonyl carbon atom of the ester bond. In contrast wi…	pfam00135, COesterase, Carboxylesterase family. 8.17e-41	-	KOG4389, KOG4389, KOG4389, Acetylcholinesterase/Butyrylcholinesterase [Signal transduction mechanisms]. 1.05e-38	sp|P37136|ACES_RAT Acetylcholinesterase OS=Rattus norvegicus GN=Ache PE=2 SV=1 1.05e-39	-	XP_048345603.1 cholinesterase-like [Sphaerodactylus townsendi] 1.57e-41	-
TRINITY_DN9983_c0_g1	0.463003	0.0803712	1.67663	-1.01163	-0.26483	-1.26637	1.02997	0.331597	-1.03875	1	-	-	-	-	-	-	-	-
TRINITY_DN9992_c0_g1	0.339657	0.445687	1.44802	-1.13531	-1.49463	-0.957888	1.32682	0.557888	-0.530248	1	-	pfam04030, ALO, D-arabinono-1,4-lactone oxidase. This domain is specific to D-arabinono-1,4-lactone oxidase EC:1.1.3.-, which is involved in the final step of the D-erythroascorbic acid biosynthesis pathway. 1.44e-53	-	KOG4730, KOG4730, KOG4730, D-arabinono-1, 4-lactone oxidase [Defense mechanisms]. 7.13e-54	sp|Q7SGY1|ALO_NEUCR Putative D-arabinono-1,4-lactone oxidase OS=Neurospora crassa (strain ATCC 24698 / 74-OR23-1A / CBS 708.71 / DSM 1257 / FGSC 987) GN=alo-1 PE=3 SV=1 0.0	GO:0003674, molecular_function;GO:0003824, catalytic activity;GO:0003885, D-arabinono-1,4-lactone oxidase activity;GO:0005575, cellular_component;GO:0005622, intracellular;GO:0005623, cell;GO:0005737, cytoplasm;GO:0005739, mitochondrion;GO:0005740, mitochondrial envelope;GO:0005741, mitochondrial outer membrane;GO:0005886, plasma membrane;GO:0006766, vitamin metabolic process;GO:0006767, water-so…	ABO15547.1 L-gulono-gamma-lactone oxidase [Triakis scyllium] 1.42e-90	-
TRINITY_DN10011_c0_g1	0.646647	-0.109856	-0.790082	0.261912	0.979689	1.16891	-0.473759	-0.739068	-0.944397	2	cd14009, STKc_ATG1_ULK_like, Catalytic domain of the Serine/Threonine kinases, Autophagy-related protein 1 and Unc-51-like kinases. STKs catalyze the transfer of the gamma-phosphoryl group from ATP to serine/threonine residues on protein substrates. This subfamily includes yeast ATG1 and metazoan homologs including vertebrate ULK1-3. The ATG1/ULK complex is conserved from yeast to humans and it p…	-	-	KOG0198, KOG0198, KOG0198, MEKK and related serine/threonine protein kinases [Signal transduction mechanisms]. 1.61e-12	sp|F4JBP3|ATG1B_ARATH Serine/threonine-protein kinase ATG1b OS=Arabidopsis thaliana GN=ATG1B PE=2 SV=1 2.19e-11	-	-	-
TRINITY_DN10079_c0_g1	-0.249001	-0.00122176	0.412896	-0.482788	2.7055	-0.0432155	-0.524191	-0.694983	-1.12299	2	-	-	-	-	-	-	-	-
TRINITY_DN10136_c0_g1	0.497454	-0.0605961	0.913509	0.0930923	1.16008	1.13439	-0.655436	-1.41751	-1.66499	2	cd17358, MFS_GLUT6_8_Class3_like, Glucose transporter (GLUT) types 6 and 8, Class 3 GLUTs, and similar transporters of the Major Facilitator Superfamily. This subfamily is composed of glucose transporter type 6 (GLUT6), GLUT8, plant early dehydration-induced gene ERD6-like proteins, and similar insect proteins including facilitated trehalose transporter Tret1-1. GLUTs, also called Solute carrier …	pfam00083, Sugar_tr, Sugar (and other) transporter. 5.06e-28	-	KOG0254, KOG0254, KOG0254, Predicted transporter (major facilitator superfamily) [General function prediction only]. 8.18e-38	sp|A6ZX88|MPH3_YEAS7 Alpha-glucosides permease MPH3 OS=Saccharomyces cerevisiae (strain YJM789) GN=MPH3 PE=3 SV=1 8.14e-87	-	CAF1444061.1 unnamed protein product [Adineta ricciae] 1.59e-36	-
TRINITY_DN10158_c0_g1	-0.176892	0.0402992	-0.137287	0.0544614	1.69975	0.869822	-0.172897	-0.883199	-1.29405	2	cd01158, SCAD_SBCAD, Short chain acyl-CoA dehydrogenases and eukaryotic short/branched chain acyl-CoA dehydrogenases. Short chain acyl-CoA dehydrogenase (SCAD). SCAD is a mitochondrial beta-oxidation enzyme. It catalyzes the alpha,beta dehydrogenation of the corresponding trans-enoyl-CoA by FAD, which becomes reduced. The reduced form of SCAD is reoxidized in the oxidative half-reaction by electr…	pfam00441, Acyl-CoA_dh_1, Acyl-CoA dehydrogenase, C-terminal domain. C-terminal domain of Acyl-CoA dehydrogenase is an all-alpha, four helical up-and-down bundle. 7.60e-07	K19823-ko00910 Nitrogen metabolism	KOG0139, KOG0139, KOG0139, Short-chain acyl-CoA dehydrogenase [Lipid transport and metabolism]. 1.15e-12	sp|Q8X1D8|NAO_FUSOX Nitroalkane oxidase OS=Fusarium oxysporum PE=1 SV=1 1.45e-151	-	CAF1081143.1 unnamed protein product [Didymodactylos carnosus] >CAF3844097.1 unnamed protein product [Didymodactylos carnosus] 1.11e-102	-
TRINITY_DN10209_c0_g1	-0.303191	-0.228967	-0.246107	-0.472162	1.22776	0.523569	0.206877	-0.22057	-0.487207	2	cd05285, sorbitol_DH, Sorbitol dehydrogenase. Sorbitol and aldose reductase are NAD(+) binding proteins of the polyol pathway, which interconverts glucose and fructose. Sorbitol dehydrogenase is tetrameric and has a single catalytic zinc per subunit. Aldose reductase catalyzes the NADP(H)-dependent conversion of glucose to sorbital, and SDH uses NAD(H) in the conversion of sorbitol to fructose. N…	pfam08240, ADH_N, Alcohol dehydrogenase GroES-like domain. This is the catalytic domain of alcohol dehydrogenases. Many of them contain an inserted zinc binding domain. This domain has a GroES-like structure. 1.54e-19	K05351-ko00040 Pentose and glucuronate interconversions	KOG0024, KOG0024, KOG0024, Sorbitol dehydrogenase [Secondary metabolites biosynthesis, transport and catabolism]. 1.16e-104	sp|C5FTT1|XYL2_ARTOC Probable D-xylulose reductase A OS=Arthroderma otae (strain ATCC MYA-4605 / CBS 113480) GN=xdhA PE=3 SV=1 1.45e-121	GO:0003674, molecular_function;GO:0003824, catalytic activity;GO:0003939, L-iditol 2-dehydrogenase activity;GO:0005975, carbohydrate metabolic process;GO:0006059, hexitol metabolic process;GO:0006066, alcohol metabolic process;GO:0008150, biological_process;GO:0008152, metabolic process;GO:0009056, catabolic process;GO:0009987, cellular process;GO:0016052, carbohydrate catabolic process;GO:001649…	XP_046645668.1 sorbitol dehydrogenase-like [Daphnia pulicaria] 2.21e-105	-
TRINITY_DN10222_c0_g1	-0.599911	-0.826609	-0.907888	0.287335	2.22421	2.11138	-0.53795	-0.708453	-1.04212	2	cd03469, Rieske_RO_Alpha_N, Rieske non-heme iron oxygenase (RO) family, N-terminal Rieske domain of the oxygenase alpha subunit; The RO family comprise a large class of aromatic ring-hydroxylating dioxygenases found predominantly in microorganisms. These enzymes enable microorganisms to tolerate and even exclusively utilize aromatic compounds for growth. ROs consist of two or three components: re…	-	-	-	sp|P0ABR7|YEAW_ECOLI Putative dioxygenase subunit alpha YeaW OS=Escherichia coli (strain K12) GN=yeaW PE=3 SV=1 1.76e-27	-	KMQ81697.1 rieske domain-containing protein, partial [Lasius niger] 7.66e-46	-
TRINITY_DN10423_c0_g1	0.388291	-0.289286	-0.295873	-0.0463209	2.79177	-0.171181	-0.297957	-1.22909	-0.850353	2	-	-	-	-	-	-	-	-
TRINITY_DN10494_c0_g1	-0.163451	-0.384812	0.437794	1.15856	0.16094	1.10751	-0.560126	-0.931485	-0.824933	2	cd00829, SCP-x_thiolase, Thiolase domain associated with sterol carrier protein (SCP)-x isoform and related proteins; SCP-2 has multiple roles in intracellular lipid circulation and metabolism. The N-terminal presequence in the SCP-x isoform represents a peroxisomal 3-ketacyl-Coa thiolase specific for branched-chain acyl CoAs, which is proteolytically cleaved from the sterol carrier protein. 8.95…	-	K08764-ko04146 Peroxisome;ko03320 PPAR signaling pathway;ko00120 Primary bile acid biosynthesis	KOG1406, KOG1406, KOG1406, Peroxisomal 3-ketoacyl-CoA-thiolase P-44/SCP2 [Lipid transport and metabolism]. 1.89e-153	sp|O62742|NLTP_RABIT Non-specific lipid-transfer protein OS=Oryctolagus cuniculus GN=SCP2 PE=1 SV=1 1.62e-147	-	XP_053186029.1 sterol carrier protein 2 [Scomber japonicus] 5.06e-157	PREDICTED: Megalops cyprinoides sterol carrier protein 2a (scp2a), mRNA 5.37e-21
TRINITY_DN10501_c0_g1	-1.62324	-0.807969	-1.06758	1.21235	3.18305	2.18204	-0.281329	-0.890252	-1.90707	2	-	-	-	-	-	-	-	-
TRINITY_DN10542_c0_g1	-0.252998	-0.0728127	-0.427605	-0.0235294	1.79777	1.50188	-0.8409	-0.8409	-0.8409	2	cd00833, PKS, polyketide synthases (PKSs) polymerize simple fatty acids into a large variety of different products, called polyketides, by successive decarboxylating Claisen condensations. PKSs can be divided into 2 groups, modular type I PKSs consisting of one or more large multifunctional proteins and iterative type II PKSs, complexes of several monofunctional subunits. 3.15e-90	pfam00109, ketoacyl-synt, Beta-ketoacyl synthase, N-terminal domain. The structure of beta-ketoacyl synthase is similar to that of the thiolase family (pfam00108) and also chalcone synthase. The active site of beta-ketoacyl synthase is located between the N and C-terminal domains. The N-terminal domain contains most of the structures involved in dimer formation and also the active site cysteine. …	-	KOG1202, KOG1202, KOG1202, Animal-type fatty acid synthase and related proteins [Lipid transport and metabolism]. 8.12e-26	sp|Q8J0F5|MLCB_PENCI Compactin diketide synthase mokB OS=Penicillium citrinum GN=mlcB PE=1 SV=1 1.80e-95	-	NXD60729.1 ACTS3 synthase [Corvus moneduloides] 1.57e-30	-
TRINITY_DN10544_c0_g1	-0.379973	-0.521994	-1.04689	0.319748	2.00835	0.82416	0.0700076	-0.836816	-0.436593	2	-	-	K01580-ko00410 beta-Alanine metabolism;ko00250 Alanine, aspartate and glutamate metabolism;ko02024 Quorum sensing;ko00430 Taurine and hypotaurine metabolism;ko00650 Butanoate metabolism;ko04727 GABAergic synapse	KOG1383, KOG1383, KOG1383, Glutamate decarboxylase/sphingosine phosphate lyase [Amino acid transport and metabolism]. 6.45e-11	sp|Q9ZPS3|DCE4_ARATH Glutamate decarboxylase 4 OS=Arabidopsis thaliana GN=GAD4 PE=1 SV=1 8.65e-35	-	CAF3619617.1 unnamed protein product [Rotaria sp. Silwood1] >CAF4973411.1 unnamed protein product [Rotaria sp. Silwood1] 7.74e-33	-
TRINITY_DN10570_c0_g1	-0.684807	-0.390591	0.129697	0.920681	0.560714	0.926687	-0.542574	-0.566395	-0.35341	2	cd05369, TER_DECR_SDR_a, Trans-2-enoyl-CoA reductase (TER) and 2,4-dienoyl-CoA reductase (DECR), atypical (a) SDR. TTER is a peroxisomal protein with a proposed role in fatty acid elongation. Fatty acid synthesis is known to occur in the both endoplasmic reticulum and mitochondria; peroxisomal TER has been proposed as an additional fatty acid elongation system, it reduces the double bond at C-2 a…	pfam00106, adh_short, short chain dehydrogenase. This family contains a wide variety of dehydrogenases. 3.39e-18	-	KOG1201, KOG1201, KOG1201, Hydroxysteroid 17-beta dehydrogenase 11 [Secondary metabolites biosynthesis, transport and catabolism]. 8.72e-40	sp|P32573|SPS19_YEAST Peroxisomal 2,4-dienoyl-CoA reductase SPS19 OS=Saccharomyces cerevisiae (strain ATCC 204508 / S288c) GN=SPS19 PE=1 SV=4 4.95e-76	-	XP_038048258.1 peroxisomal 2,4-dienoyl-CoA reductase-like isoform X1 [Patiria miniata] 1.25e-48	-
TRINITY_DN10573_c0_g1	0.246469	0.335661	0.379655	0.0425449	0.761417	0.230777	-0.238856	-0.84379	-0.913877	2	-	pfam03986, Autophagy_N, Autophagocytosis associated protein (Atg3), N-terminal domain. Autophagocytosis is a starvation-induced process responsible for transport of cytoplasmic proteins to the lysosome/vacuole. Atg3 is a ubiquitin like modifier that is topologically similar to the canonical E2 enzyme. It catalyzes the conjugation of Atg8 and phosphatidylethanolamine. 1.61e-34	K08343-ko04140 Regulation of autophagy	KOG2981, KOG2981, KOG2981, Protein involved in autophagocytosis during starvation [General function prediction only]. 7.49e-42	sp|Q51LD2|ATG3_MAGO7 Autophagy-related protein 3 OS=Magnaporthe oryzae (strain 70-15 / ATCC MYA-4617 / FGSC 8958) GN=ATG3 PE=3 SV=1 1.48e-155	GO:0000045, autophagosome assembly;GO:0000151, ubiquitin ligase complex;GO:0000153, cytoplasmic ubiquitin ligase complex;GO:0000422, autophagy of mitochondrion;GO:0003674, molecular_function;GO:0003824, catalytic activity;GO:0005575, cellular_component;GO:0005622, intracellular;GO:0005623, cell;GO:0005737, cytoplasm;GO:0005829, cytosol;GO:0006464, cellular protein modification process;GO:0006497,…	RCN32723.1 autophagocytosis associated protein [Ancylostoma caninum] 1.78e-40	-
TRINITY_DN10580_c0_g1	-0.74035	-1.38012	-0.73881	0.263485	2.26657	1.95189	-0.746245	-0.669876	-0.206547	2	cd17327, MFS_FEN2_like, Pantothenate transporter FEN2 and similar transporters of the Major Facilitator Superfamily. This family is composed of Saccharomyces cerevisiae pantothenate transporter FEN2 (or fenpropimorph resistance protein 2) and similar proteins from fungi and bacteria including fungal vitamin H transporter, allantoate permease, and high-affinity nicotinic acid transporter, as well …	-	-	KOG2533, KOG2533, KOG2533, Permease of the major facilitator superfamily [Carbohydrate transport and metabolism]. 1.49e-43	sp|Q9US44|YIZG_SCHPO Uncharacterized transporter C1002.16c OS=Schizosaccharomyces pombe (strain 972 / ATCC 24843) GN=SPAC1002.16c PE=3 SV=1 1.18e-62	-	CAF1183618.1 unnamed protein product [Rotaria magnacalcarata] >CAF1643560.1 unnamed protein product [Rotaria magnacalcarata] >CAF2095884.1 unnamed protein product [Rotaria magnacalcarata] >CAF2114159.1 unnamed protein product [Rotaria magnacalcarata] >CAF3757442.1 unnamed protein product [Rotaria magnacalcarata] 2.85e-98	-
TRINITY_DN10583_c0_g1	-0.240874	-0.186211	-0.228271	0.78212	1.28264	0.807541	-1.11383	-0.585333	-0.517775	2	-	pfam00755, Carn_acyltransf, Choline/Carnitine o-acyltransferase. 8.04e-134	K00624-ko04146 Peroxisome	KOG3717, KOG3717, KOG3717, Carnitine O-acyltransferase CRAT [Lipid transport and metabolism]. 1.84e-103	sp|Q00614|CACP_CANTR Carnitine O-acetyltransferase, mitochondrial OS=Candida tropicalis GN=CAT2 PE=3 SV=1 2.67e-163	GO:0003674, molecular_function;GO:0003824, catalytic activity;GO:0004092, carnitine O-acetyltransferase activity;GO:0005575, cellular_component;GO:0005622, intracellular;GO:0005623, cell;GO:0005737, cytoplasm;GO:0005739, mitochondrion;GO:0005777, peroxisome;GO:0006575, cellular modified amino acid metabolic process;GO:0006577, amino-acid betaine metabolic process;GO:0006807, nitrogen compound met…	KAJ3027223.1 Carnitine O-acetyltransferase mitochondrial [Siphonaria sp. JEL0065] 1.51e-173	-
TRINITY_DN10587_c0_g1	-0.00369937	-0.596163	-0.632473	0.357832	0.892653	0.929166	-0.051556	-0.570124	-0.325635	2	-	pfam01670, Glyco_hydro_12, Glycosyl hydrolase family 12. 2.52e-12	-	-	sp|Q5BG78|XGEA_EMENI Xyloglucan-specific endo-beta-1,4-glucanase A OS=Emericella nidulans (strain FGSC A4 / ATCC 38163 / CBS 112.46 / NRRL 194 / M139) GN=xgeA PE=1 SV=1 1.67e-12	-	-	-
[truncated: 3,870 more rows]
