# Supplementary material for: The Response of Growth and Transcriptome Profiles of Tea Grey Blight Disease Pathogen Pestalotiopsis theae to the Variation of Exogenous L-Theanine
Source: Int J Mol Sci. 2024 Mar 20;25(6):3493. doi: 10.3390/ijms25063493 (PMC10971465; doi:10.3390/ijms25063493)
Supplement: Supplementary file 1 [file ijms-25-03493-s001.zip › ijms-2863686-supplementary/Supplemental Table S7.xlsx]

## Sheet: GO_enrichment
Table S7. GO of DEGs in the three comparisons
GO.ID	Term	Ontology	Significant genes	Annotated genes	P-value	Q-value
Th2 vs. Th0
GO:0003824	catalytic activity	molecular function	209/286	3244/6333	9.8e-15	3.283e-11
GO:0005739	mitochondrion	cellular component	98/298	1336/7023	4.1e-09	8.1795e-06
GO:0047536	2-aminoadipate transaminase activity	molecular function	5/286	6/6333	1e-06	0.001675
GO:0016491	oxidoreductase activity	molecular function	53/286	637/6333	5.9e-06	0.00658833
GO:0006520	cellular amino acid metabolic process	biological process	36/322	333/7119	7.7e-07	0.0111812
GO:0016798	hydrolase activity, acting on glycosyl bonds	molecular function	17/286	117/6333	1.7e-05	0.0142375
GO:0008483	transaminase activity	molecular function	8/286	31/6333	5e-05	0.0335
GO:0008793	aromatic-amino-acid:2-oxoglutarate aminotransferase activity	molecular function	3/286	3/6333	9.1e-05	0.0478571
GO:0016769	transferase activity, transferring nitrogenous groups	molecular function	8/286	34/6333	0.0001	0.0478571
Th4 vs. Th0
GO:0003824	catalytic activity	molecular function	303/448	3244/6333	2.3e-13	7.705e-10
GO:0000324	fungal-type vacuole	cellular component	48/482	248/7023	2.4e-11	2.69325e-08
GO:0000322	storage vacuole	cellular component	48/482	249/7023	2.7e-11	2.69325e-08
GO:0071852	fungal-type cell wall organization or biogenesis	biological process	37/528	151/7119	3.9e-11	5.66319e-07
GO:0045229	external encapsulating structure organization	biological process	31/528	119/7119	3e-10	2.17815e-06
GO:0071554	cell wall organization or biogenesis	biological process	40/528	187/7119	5.4e-10	2.61378e-06
GO:0071555	cell wall organization	biological process	30/528	117/7119	9e-10	3.26722e-06
GO:0031505	fungal-type cell wall organization	biological process	29/528	113/7119	1.7e-09	4.93714e-06
GO:0044550	secondary metabolite biosynthetic process	biological process	19/528	69/7119	3.5e-07	0.000847058
GO:0006520	cellular amino acid metabolic process	biological process	50/528	333/7119	8.8e-07	0.0018255
GO:0005976	polysaccharide metabolic process	biological process	32/528	175/7119	1.3e-06	0.00225882
GO:0019748	secondary metabolic process	biological process	24/528	111/7119	1.4e-06	0.00225882
GO:0004553	hydrolase activity, hydrolyzing O-glycosyl compounds	molecular function	20/448	97/6333	1.1e-05	0.018425
GO:0016798	hydrolase activity, acting on glycosyl bonds	molecular function	22/448	117/6333	1.8e-05	0.0201
GO:1901663	quinone biosynthetic process	biological process	10/528	28/7119	1.8e-05	0.0217815
GO:0042181	ketone biosynthetic process	biological process	12/528	40/7119	2e-05	0.0217815
GO:0000272	polysaccharide catabolic process	biological process	17/528	74/7119	2.1e-05	0.0217815
GO:0019752	carboxylic acid metabolic process	biological process	87/528	766/7119	2.1e-05	0.0217815
GO:1901605	alpha-amino acid metabolic process	biological process	35/528	226/7119	2.1e-05	0.0217815
GO:0009277	fungal-type cell wall	cellular component	18/482	91/7023	3.6e-05	0.02394
GO:0015809	arginine transport	biological process	7/528	14/7119	2.6e-05	0.0251697
GO:0031224	intrinsic component of membrane	cellular component	104/482	1066/7023	6.5e-05	0.027531
GO:0005739	mitochondrion	cellular component	125/482	1336/7023	6.9e-05	0.027531
GO:1901661	quinone metabolic process	biological process	10/528	30/7119	3.6e-05	0.0326722
GO:0043436	oxoacid metabolic process	biological process	88/528	790/7119	3.9e-05	0.0333129
GO:0015802	basic amino acid transport	biological process	7/528	15/7119	4.5e-05	0.0338823
GO:0006082	organic acid metabolic process	biological process	88/528	793/7119	4.5e-05	0.0338823
GO:0006855	drug transmembrane transport	biological process	19/528	94/7119	4.7e-05	0.0338823
GO:0000746	conjugation	biological process	23/528	127/7119	4.9e-05	0.0338823
GO:0044262	cellular carbohydrate metabolic process	biological process	37/528	255/7119	5.3e-05	0.0340928
GO:1903400	L-arginine transmembrane transport	biological process	6/528	11/7119	5.4e-05	0.0340928
GO:0044764	multi-organism cellular process	biological process	28/528	172/7119	5.7e-05	0.0344874
GO:0044283	small molecule biosynthetic process	biological process	70/528	599/7119	6.1e-05	0.0354312
GO:0008652	cellular amino acid biosynthetic process	biological process	25/528	147/7119	6.8e-05	0.037978
GO:0010383	cell wall polysaccharide metabolic process	biological process	14/528	59/7119	7.6e-05	0.0408739
GO:1902023	L-arginine transport	biological process	6/528	12/7119	0.0001	0.0458558
GO:1903826	arginine transmembrane transport	biological process	6/528	12/7119	0.0001	0.0458558
GO:0031204	posttranslational protein targeting to membrane, translocation	biological process	5/528	8/7119	0.0001	0.0458558
GO:0044264	cellular polysaccharide metabolic process	biological process	22/528	125/7119	0.00011	0.0458558
GO:0009272	fungal-type cell wall biogenesis	biological process	14/528	61/7119	0.00011	0.0458558
GO:0006081	cellular aldehyde metabolic process	biological process	17/528	84/7119	0.00011	0.0458558
GO:0006620	posttranslational protein targeting to endoplasmic reticulum membrane	biological process	7/528	17/7119	0.00012	0.0458558
GO:0045332	phospholipid translocation	biological process	7/528	17/7119	0.00012	0.0458558
GO:0016053	organic acid biosynthetic process	biological process	46/528	356/7119	0.00012	0.0458558
GO:0046394	carboxylic acid biosynthetic process	biological process	46/528	356/7119	0.00012	0.0458558
GO:0000747	conjugation with cellular fusion	biological process	22/528	126/7119	0.00012	0.0458558
GO:0016021	integral component of membrane	cellular component	99/482	1025/7023	0.00015	0.049875
Th4 vs. Th2
GO:0005789	endoplasmic reticulum membrane	cellular component	25/209	421/7023	0.00068	0.274867
GO:0097583	dolichyl-phosphate-mannose-protein mannosyltransferase Pmt1p-Pmt3p dimer complex	cellular component	2/209	2/7023	0.00088	0.274867
GO:0097584	dolichyl-phosphate-mannose-protein mannosyltransferase Pmt5p-Pmt2p dimer complex	cellular component	2/209	2/7023	0.00088	0.274867
GO:0097585	dolichyl-phosphate-mannose-protein mannosyltransferase Pmt5p-Pmt3p dimer complex	cellular component	2/209	2/7023	0.00088	0.274867
GO:0000324	fungal-type vacuole	cellular component	17/209	248/7023	0.0011	0.274867
GO:0042175	nuclear outer membrane-endoplasmic reticulum membrane network	cellular component	25/209	436/7023	0.00112	0.274867
GO:0000322	storage vacuole	cellular component	17/209	249/7023	0.00115	0.274867
GO:0005783	endoplasmic reticulum	cellular component	42/209	882/7023	0.00116	0.274867
GO:0098827	endoplasmic reticulum subcompartment	cellular component	25/209	439/7023	0.00124	0.274867
GO:0044438	microbody part	cellular component	7/209	60/7023	0.00189	0.342777
GO:0044439	peroxisomal part	cellular component	7/209	60/7023	0.00189	0.342777
GO:0031502	dolichyl-phosphate-mannose-protein mannosyltransferase complex	cellular component	2/209	3/7023	0.00259	0.397465
GO:0097582	dolichyl-phosphate-mannose-protein mannosyltransferase Pmt1p-Pmt2p dimer complex	cellular component	2/209	3/7023	0.00259	0.397465
