# Supplementary material for: The Response of Growth and Transcriptome Profiles of Tea Grey Blight Disease Pathogen Pestalotiopsis theae to the Variation of Exogenous L-Theanine
Source: Int J Mol Sci. 2024 Mar 20;25(6):3493. doi: 10.3390/ijms25063493 (PMC10971465; doi:10.3390/ijms25063493)
Supplement: Supplementary file 1 [file ijms-25-03493-s001.zip › ijms-2863686-supplementary/Supplemental Table S8.xlsx]

## Sheet: KEGG_enrichment
Table S8. KEGG of DEGs in the three comparisons
ID	Description	Significant genes	Annotated genes	P-value	Q-value
Th2 vs. Th0
ko00040	Pentose and glucuronate interconversions	18/293	75/4987	1.86654e-07	2.61315e-05
ko00340	Histidine metabolism	11/293	31/4987	7.02984e-07	3.65588e-05
ko00380	Tryptophan metabolism	18/293	82/4987	7.83403e-07	3.65588e-05
ko00360	Phenylalanine metabolism	17/293	76/4987	1.20751e-06	4.2263e-05
ko00950	Isoquinoline alkaloid biosynthesis	17/293	79/4987	2.14839e-06	6.01548e-05
ko00500	Starch and sucrose metabolism	27/293	181/4987	5.12903e-06	0.000119677
ko00960	Tropane, piperidine and pyridine alkaloid biosynthesis	10/293	31/4987	6.18149e-06	0.00012363
ko00350	Tyrosine metabolism	22/293	137/4987	1.2093e-05	0.000211628
ko00410	beta-Alanine metabolism	14/293	68/4987	2.95037e-05	0.000458946
ko00330	Arginine and proline metabolism	15/293	84/4987	8.85278e-05	0.00123939
ko00561	Glycerolipid metabolism	12/293	61/4987	0.000174475	0.00222059
ko00053	Ascorbate and aldarate metabolism	7/293	24/4987	0.000326911	0.00381396
ko00401	Novobiocin biosynthesis	4/293	7/4987	0.000354809	0.00382102
ko00940	Phenylpropanoid biosynthesis	12/293	69/4987	0.000578139	0.00534929
ko00903	Limonene and pinene degradation	5/293	13/4987	0.000588788	0.00534929
ko00400	Phenylalanine, tyrosine and tryptophan biosynthesis	8/293	34/4987	0.000611348	0.00534929
ko00260	Glycine, serine and threonine metabolism	14/293	99/4987	0.00174408	0.014363
ko00130	Ubiquinone and other terpenoid-quinone biosynthesis	7/293	32/4987	0.00211844	0.0164767
ko00300	Lysine biosynthesis	7/293	33/4987	0.00255627	0.0188357
Th4 vs. Th0
ko00500	Starch and sucrose metabolism	37/430	181/4987	3.83427e-07	6.69988e-05
ko00627	Aminobenzoate degradation	13/430	41/4987	2.26423e-05	0.00197822
ko00380	Tryptophan metabolism	19/430	82/4987	4.74749e-05	0.00240511
ko00360	Phenylalanine metabolism	18/430	76/4987	5.50567e-05	0.00240511
ko00350	Tyrosine metabolism	26/430	137/4987	8.35005e-05	0.00291812
ko00950	Isoquinoline alkaloid biosynthesis	17/430	79/4987	0.0003086	0.00898729
ko00520	Amino sugar and nucleotide sugar metabolism	22/430	119/4987	0.000429857	0.0107303
ko00040	Pentose and glucuronate interconversions	16/430	75/4987	0.000511552	0.0111734
ko00030	Pentose phosphate pathway	16/430	78/4987	0.000808086	0.0152648
ko00340	Histidine metabolism	9/430	31/4987	0.000873586	0.0152648
ko00460	Cyanoamino acid metabolism	15/430	72/4987	0.000987773	0.0156909
ko00260	Glycine, serine and threonine metabolism	18/430	99/4987	0.00171502	0.0249731
ko00940	Phenylpropanoid biosynthesis	14/430	69/4987	0.00188857	0.0253848
ko00960	Tropane, piperidine and pyridine alkaloid biosynthesis	8/430	31/4987	0.00382026	0.0470651
ko00740	Riboflavin metabolism	11/430	52/4987	0.00404022	0.0470651
ko00130	Ubiquinone and other terpenoid-quinone biosynthesis	8/430	32/4987	0.00471885	0.0498143
ko00330	Arginine and proline metabolism	15/430	84/4987	0.0048464	0.0498143
Th4 vs. Th2
ko00510	N-Glycan biosynthesis	9/190	46/4987	4.54006e-05	0.00821989
ko00513	Various types of N-glycan biosynthesis	8/190	46/4987	0.0002878	0.0175729
ko04146	Peroxisome	13/190	112/4987	0.000291178	0.0175729
