# Supplementary material for: The Response of Growth and Transcriptome Profiles of Tea Grey Blight Disease Pathogen Pestalotiopsis theae to the Variation of Exogenous L-Theanine
Source: Int J Mol Sci. 2024 Mar 20;25(6):3493. doi: 10.3390/ijms25063493 (PMC10971465; doi:10.3390/ijms25063493)
Supplement: Supplementary file 1 [file ijms-25-03493-s001.zip › ijms-2863686-supplementary/Supplemental Table S9.xlsx]

## Sheet: KOG enrichment
Table S9. KOG of DEGs in the three comparisons
ID	Description	Significant genes	Annotated gene	P-value	Q-value
Th2 vs. Th0
Q	Secondary metabolites biosynthesis, transport and catabolism	120/844	567/8237	1.04759e-15	1.87464e-14
R	General function prediction only	174/844	1233/8237	1.87324e-06	1.67606e-05
I	Lipid transport and metabolism	84/844	523/8237	1.36632e-05	8.15e-05
E	Amino acid transport and metabolism	75/844	479/8237	9.56807e-05	0.000428045
C	Energy production and conversion	91/844	659/8237	0.00150016	0.005369
G	Carbohydrate transport and metabolism	76/844	538/8237	0.00198646	0.00592452
Th4 vs. Th0
R	General function prediction only	289/1256	1233/8237	9.83391e-17	1.47304e-15
Q	Secondary metabolites biosynthesis, transport and catabolism	160/1256	567/8237	1.64634e-16	1.47304e-15
M	Cell wall/membrane/envelope biogenesis	60/1256	194/8237	1.95174e-08	1.16419e-07
I	Lipid transport and metabolism	112/1256	523/8237	6.39407e-05	0.000286051
E	Amino acid transport and metabolism	94/1256	479/8237	0.00457173	0.0139125
P	Inorganic ion transport and metabolism	45/1256	202/8237	0.00466478	0.0139125
G	Carbohydrate transport and metabolism	103/1256	538/8237	0.00660737	0.016891
Th4 vs. Th2
Q	Secondary metabolites biosynthesis, transport and catabolism	66/493	567/8237	7.90352e-08	1.5807e-06
I	Lipid transport and metabolism	61/493	523/8237	2.42846e-07	2.42846e-06
R	General function prediction only	101/493	1233/8237	0.000404858	0.00269905
