# Supplementary material for: The Response of Growth and Transcriptome Profiles of Tea Grey Blight Disease Pathogen Pestalotiopsis theae to the Variation of Exogenous L-Theanine
Source: Int J Mol Sci. 2024 Mar 20;25(6):3493. doi: 10.3390/ijms25063493 (PMC10971465; doi:10.3390/ijms25063493)
Supplement: Supplementary file 1 [file ijms-25-03493-s001.zip › ijms-2863686-supplementary/Supplemental Table S10.xlsx]

## Sheet: Sheet1
Table S10. Primers for validated qRT-PCR
Gene ID	Forward primer (5'-3')	Reverse primer (5'-3')
TRINITY_DN10916_c0_g1	GCAAGATAGCGATAGGCAGGATG	AGTCGGTGAACTTGGAACTTTCTG
TRINITY_DN12261_c0_g1	AGTGTAAGGTGATCGTTGAGCATTG	AGCCGCCTCGCCGAATTG
TRINITY_DN9407_c0_g2	CAAAGGCACAACCAATCGTAAAGG	ATCATCCGTACTGGCACCTCTC
TRINITY_DN8691_c0_g1	CCTGAGCGAACACCGATTGATG	CAGCCGTTCCGTTGCCTTG
TRINITY_DN3986_c0_g1	CGTCTACACTCGGCAGGGATC	TGTTGGAGGAAGCGGAGGTTC
TRINITY_DN14306_c2_g3	AAGCGAGTCTGAATAAGGCGTTTAG	GGGTTCGGTCCTCCAGTGTG
TRINITY_DN11167_c0_g1	GACGGTGTTCACATCTATGCCAAG	TGGTCTTGTCACAGTCCTGATGG
TRINITY_DN11140_c0_g1	GCCACGCAACTCATCATATTTCG	GAACAACATCGCTCACAATCATCTG
β-actin	CTTCTATTGTCGGCCGACCGC	GATGCCAGATCTTCTCCATGCG
